# Supplementary material for: fmo-4 promotes longevity and stress resistance via ER to mitochondria calcium regulation in C. elegans
Source: eLife journal article supplement (doi:10.7554/elife.99971), 2024-08-27
Supplement: data3 [file cox regression Carb and EDTA rep 1.xlsx]

## Sheet: data
condition	Plate	genotype	day	dead normal	dead rupture	censored
water WT	water	WT	10	0	0	0
water WT	water	WT	13	3	0	0
water WT	water	WT	15	11	0	0
water WT	water	WT	17	13	0	0
water WT	water	WT	20	14	0	0
water WT	water	WT	22	21	0	0
water WT	water	WT	24	21	0	0
water WT	water	WT	27	9	0	0
water WT	water	WT	29	7	0	0
water WT	water	WT	31	2	0	0
water WT	water	WT	34	5	0	0
water WT	water	WT	36	4	0	0
water WT	water	WT	38	0	0	0
water WT	water	WT	41	0	0	0
water WT	water	WT	43	0	0	0
water WT	water	WT	45	0	0	0
water fmo-4 OE	water	fmo-4 OE	10	0	0	0
water fmo-4 OE	water	fmo-4 OE	13	0	0	0
water fmo-4 OE	water	fmo-4 OE	15	2	0	0
water fmo-4 OE	water	fmo-4 OE	17	4	0	0
water fmo-4 OE	water	fmo-4 OE	20	6	0	0
water fmo-4 OE	water	fmo-4 OE	22	10	0	0
water fmo-4 OE	water	fmo-4 OE	24	13	0	0
water fmo-4 OE	water	fmo-4 OE	27	31	0	0
water fmo-4 OE	water	fmo-4 OE	29	24	0	0
water fmo-4 OE	water	fmo-4 OE	31	15	0	0
water fmo-4 OE	water	fmo-4 OE	34	10	0	0
water fmo-4 OE	water	fmo-4 OE	36	9	0	0
water fmo-4 OE	water	fmo-4 OE	38	5	0	0
water fmo-4 OE	water	fmo-4 OE	41	5	0	0
water fmo-4 OE	water	fmo-4 OE	43	1	0	0
water fmo-4 OE	water	fmo-4 OE	45	0	0	0
water fmo-4 KO	water	fmo-4 KO	10	0	0	0
water fmo-4 KO	water	fmo-4 KO	13	4	0	0
water fmo-4 KO	water	fmo-4 KO	15	11	0	0
water fmo-4 KO	water	fmo-4 KO	17	14	0	0
water fmo-4 KO	water	fmo-4 KO	20	19	0	0
water fmo-4 KO	water	fmo-4 KO	22	16	0	0
water fmo-4 KO	water	fmo-4 KO	24	15	0	0
water fmo-4 KO	water	fmo-4 KO	27	9	0	0
water fmo-4 KO	water	fmo-4 KO	29	7	0	0
water fmo-4 KO	water	fmo-4 KO	31	2	0	0
water fmo-4 KO	water	fmo-4 KO	34	6	0	0
water fmo-4 KO	water	fmo-4 KO	36	0	0	0
water fmo-4 KO	water	fmo-4 KO	38	0	0	0
water fmo-4 KO	water	fmo-4 KO	41	0	0	0
water fmo-4 KO	water	fmo-4 KO	43	0	0	0
water fmo-4 KO	water	fmo-4 KO	45	0	0	0
EDTA WT	EDTA	WT	10	0	0	0
EDTA WT	EDTA	WT	13	0	0	0
EDTA WT	EDTA	WT	15	1	0	0
EDTA WT	EDTA	WT	17	4	0	0
EDTA WT	EDTA	WT	20	9	0	0
EDTA WT	EDTA	WT	22	13	0	0
EDTA WT	EDTA	WT	24	25	0	0
EDTA WT	EDTA	WT	27	24	0	0
EDTA WT	EDTA	WT	29	16	0	0
EDTA WT	EDTA	WT	31	15	0	0
EDTA WT	EDTA	WT	34	10	0	0
EDTA WT	EDTA	WT	36	7	0	0
EDTA WT	EDTA	WT	38	8	0	0
EDTA WT	EDTA	WT	41	3	0	0
EDTA WT	EDTA	WT	43	0	0	0
EDTA WT	EDTA	WT	45	0	0	0
EDTA fmo-4 OE	EDTA	fmo-4 OE	10	0	0	0
EDTA fmo-4 OE	EDTA	fmo-4 OE	13	0	0	0
EDTA fmo-4 OE	EDTA	fmo-4 OE	15	1	0	0
EDTA fmo-4 OE	EDTA	fmo-4 OE	17	5	0	0
EDTA fmo-4 OE	EDTA	fmo-4 OE	20	7	0	0
EDTA fmo-4 OE	EDTA	fmo-4 OE	22	15	0	0
EDTA fmo-4 OE	EDTA	fmo-4 OE	24	23	0	0
EDTA fmo-4 OE	EDTA	fmo-4 OE	27	23	0	0
EDTA fmo-4 OE	EDTA	fmo-4 OE	29	16	0	0
EDTA fmo-4 OE	EDTA	fmo-4 OE	31	11	0	0
EDTA fmo-4 OE	EDTA	fmo-4 OE	34	7	0	0
EDTA fmo-4 OE	EDTA	fmo-4 OE	36	4	0	0
EDTA fmo-4 OE	EDTA	fmo-4 OE	38	5	0	0
EDTA fmo-4 OE	EDTA	fmo-4 OE	41	2	0	0
EDTA fmo-4 OE	EDTA	fmo-4 OE	43	1	0	0
EDTA fmo-4 OE	EDTA	fmo-4 OE	45	0	0	0
EDTA fmo-4 KO	EDTA	fmo-4 KO	10	0	0	0
EDTA fmo-4 KO	EDTA	fmo-4 KO	13	4	0	0
EDTA fmo-4 KO	EDTA	fmo-4 KO	15	11	0	0
EDTA fmo-4 KO	EDTA	fmo-4 KO	17	12	0	0
EDTA fmo-4 KO	EDTA	fmo-4 KO	20	32	0	0
EDTA fmo-4 KO	EDTA	fmo-4 KO	22	19	0	0
EDTA fmo-4 KO	EDTA	fmo-4 KO	24	22	0	0
EDTA fmo-4 KO	EDTA	fmo-4 KO	27	11	0	0
EDTA fmo-4 KO	EDTA	fmo-4 KO	29	8	0	0
EDTA fmo-4 KO	EDTA	fmo-4 KO	31	1	0	0
EDTA fmo-4 KO	EDTA	fmo-4 KO	34	0	0	0
EDTA fmo-4 KO	EDTA	fmo-4 KO	36	0	0	0
EDTA fmo-4 KO	EDTA	fmo-4 KO	38	0	0	0
EDTA fmo-4 KO	EDTA	fmo-4 KO	41	0	0	0
EDTA fmo-4 KO	EDTA	fmo-4 KO	43	0	0	0
EDTA fmo-4 KO	EDTA	fmo-4 KO	45	0	0	0
Carbachol WT	Carbachol	WT	10	0	0	0
Carbachol WT	Carbachol	WT	13	0	0	0
Carbachol WT	Carbachol	WT	15	1	0	0
Carbachol WT	Carbachol	WT	17	2	0	0
Carbachol WT	Carbachol	WT	20	7	0	0
Carbachol WT	Carbachol	WT	22	10	0	0
Carbachol WT	Carbachol	WT	24	23	0	0
Carbachol WT	Carbachol	WT	27	23	0	0
Carbachol WT	Carbachol	WT	29	15	0	0
Carbachol WT	Carbachol	WT	31	11	0	0
Carbachol WT	Carbachol	WT	34	11	0	0
Carbachol WT	Carbachol	WT	36	4	0	0
Carbachol WT	Carbachol	WT	38	6	0	0
Carbachol WT	Carbachol	WT	41	3	0	0
Carbachol WT	Carbachol	WT	43	1	0	0
Carbachol WT	Carbachol	WT	45	1	0	0
Carbachol fmo-4 OE	Carbachol	fmo-4 OE	10	0	0	0
Carbachol fmo-4 OE	Carbachol	fmo-4 OE	13	0	0	0
Carbachol fmo-4 OE	Carbachol	fmo-4 OE	15	1	0	0
Carbachol fmo-4 OE	Carbachol	fmo-4 OE	17	4	0	0
Carbachol fmo-4 OE	Carbachol	fmo-4 OE	20	7	0	0
Carbachol fmo-4 OE	Carbachol	fmo-4 OE	22	10	0	0
Carbachol fmo-4 OE	Carbachol	fmo-4 OE	24	20	0	0
Carbachol fmo-4 OE	Carbachol	fmo-4 OE	27	24	0	0
Carbachol fmo-4 OE	Carbachol	fmo-4 OE	29	18	0	0
Carbachol fmo-4 OE	Carbachol	fmo-4 OE	31	16	0	0
Carbachol fmo-4 OE	Carbachol	fmo-4 OE	34	11	0	0
Carbachol fmo-4 OE	Carbachol	fmo-4 OE	36	6	0	0
Carbachol fmo-4 OE	Carbachol	fmo-4 OE	38	12	0	0
Carbachol fmo-4 OE	Carbachol	fmo-4 OE	41	4	0	0
Carbachol fmo-4 OE	Carbachol	fmo-4 OE	43	1	0	0
Carbachol fmo-4 OE	Carbachol	fmo-4 OE	45	0	0	0
Carbachol fmo-4 KO	Carbachol	fmo-4 KO	10	0	0	0
Carbachol fmo-4 KO	Carbachol	fmo-4 KO	13	5	0	0
Carbachol fmo-4 KO	Carbachol	fmo-4 KO	15	11	0	0
Carbachol fmo-4 KO	Carbachol	fmo-4 KO	17	16	0	0
Carbachol fmo-4 KO	Carbachol	fmo-4 KO	20	33	0	0
Carbachol fmo-4 KO	Carbachol	fmo-4 KO	22	23	0	0
Carbachol fmo-4 KO	Carbachol	fmo-4 KO	24	26	0	0
Carbachol fmo-4 KO	Carbachol	fmo-4 KO	27	19	0	0
Carbachol fmo-4 KO	Carbachol	fmo-4 KO	29	6	0	0
Carbachol fmo-4 KO	Carbachol	fmo-4 KO	31	4	0	0
Carbachol fmo-4 KO	Carbachol	fmo-4 KO	34	0	0	0
Carbachol fmo-4 KO	Carbachol	fmo-4 KO	36	0	0	0
Carbachol fmo-4 KO	Carbachol	fmo-4 KO	38	0	0	0
Carbachol fmo-4 KO	Carbachol	fmo-4 KO	41	0	0	0
Carbachol fmo-4 KO	Carbachol	fmo-4 KO	43	0	0	0
Carbachol fmo-4 KO	Carbachol	fmo-4 KO	45	0	0	0
