# Supplementary material for: fmo-4 promotes longevity and stress resistance via ER to mitochondria calcium regulation in C. elegans
Source: eLife journal article supplement (doi:10.7554/elife.99971), 2024-08-27
Supplement: data3 [file cox regression Carb and EDTA rep 2.xlsx]

## Sheet: data
condition	Plate	genotype	day	dead normal	dead rupture	censored
water WT	water	WT	10	0	0	0
water WT	water	WT	13	3	0	0
water WT	water	WT	15	4	0	0
water WT	water	WT	17	7	0	0
water WT	water	WT	20	13	0	0
water WT	water	WT	22	9	0	0
water WT	water	WT	24	13	0	0
water WT	water	WT	27	17	0	0
water WT	water	WT	29	3	0	0
water WT	water	WT	31	5	0	0
water WT	water	WT	34	2	0	0
water WT	water	WT	36	1	0	0
water WT	water	WT	38	0	0	0
water WT	water	WT	41	0	0	0
water WT	water	WT	43	0	0	0
water WT	water	WT	45	0	0	0
water fmo-4 OE	water	fmo-4 OE	10	0	0	0
water fmo-4 OE	water	fmo-4 OE	13	0	0	0
water fmo-4 OE	water	fmo-4 OE	15	2	0	0
water fmo-4 OE	water	fmo-4 OE	17	4	0	0
water fmo-4 OE	water	fmo-4 OE	20	7	0	0
water fmo-4 OE	water	fmo-4 OE	22	6	0	0
water fmo-4 OE	water	fmo-4 OE	24	9	0	0
water fmo-4 OE	water	fmo-4 OE	27	13	0	0
water fmo-4 OE	water	fmo-4 OE	29	19	0	0
water fmo-4 OE	water	fmo-4 OE	31	26	0	0
water fmo-4 OE	water	fmo-4 OE	34	11	0	0
water fmo-4 OE	water	fmo-4 OE	36	6	0	0
water fmo-4 OE	water	fmo-4 OE	38	8	0	0
water fmo-4 OE	water	fmo-4 OE	41	0	0	0
water fmo-4 OE	water	fmo-4 OE	43	0	0	0
water fmo-4 OE	water	fmo-4 OE	45	0	0	0
water fmo-4 KO	water	fmo-4 KO	10	0	0	0
water fmo-4 KO	water	fmo-4 KO	13	4	0	0
water fmo-4 KO	water	fmo-4 KO	15	4	0	0
water fmo-4 KO	water	fmo-4 KO	17	9	0	0
water fmo-4 KO	water	fmo-4 KO	20	22	0	0
water fmo-4 KO	water	fmo-4 KO	22	30	0	0
water fmo-4 KO	water	fmo-4 KO	24	24	0	0
water fmo-4 KO	water	fmo-4 KO	27	18	0	0
water fmo-4 KO	water	fmo-4 KO	29	6	0	0
water fmo-4 KO	water	fmo-4 KO	31	0	0	0
water fmo-4 KO	water	fmo-4 KO	34	0	0	0
water fmo-4 KO	water	fmo-4 KO	36	0	0	0
water fmo-4 KO	water	fmo-4 KO	38	0	0	0
water fmo-4 KO	water	fmo-4 KO	41	0	0	0
water fmo-4 KO	water	fmo-4 KO	43	0	0	0
water fmo-4 KO	water	fmo-4 KO	45	0	0	0
EDTA WT	EDTA	WT	10	0	0	0
EDTA WT	EDTA	WT	13	0	0	0
EDTA WT	EDTA	WT	15	2	0	0
EDTA WT	EDTA	WT	17	3	0	0
EDTA WT	EDTA	WT	20	9	0	0
EDTA WT	EDTA	WT	22	8	0	0
EDTA WT	EDTA	WT	24	7	0	0
EDTA WT	EDTA	WT	27	13	0	0
EDTA WT	EDTA	WT	29	27	0	0
EDTA WT	EDTA	WT	31	7	0	0
EDTA WT	EDTA	WT	34	8	0	0
EDTA WT	EDTA	WT	36	4	0	0
EDTA WT	EDTA	WT	38	5	0	0
EDTA WT	EDTA	WT	41	0	0	0
EDTA WT	EDTA	WT	43	0	0	0
EDTA WT	EDTA	WT	45	0	0	0
EDTA fmo-4 OE	EDTA	fmo-4 OE	10	0	0	0
EDTA fmo-4 OE	EDTA	fmo-4 OE	13	0	0	0
EDTA fmo-4 OE	EDTA	fmo-4 OE	15	3	0	0
EDTA fmo-4 OE	EDTA	fmo-4 OE	17	4	0	0
EDTA fmo-4 OE	EDTA	fmo-4 OE	20	8	0	0
EDTA fmo-4 OE	EDTA	fmo-4 OE	22	7	0	0
EDTA fmo-4 OE	EDTA	fmo-4 OE	24	9	0	0
EDTA fmo-4 OE	EDTA	fmo-4 OE	27	11	0	0
EDTA fmo-4 OE	EDTA	fmo-4 OE	29	20	0	0
EDTA fmo-4 OE	EDTA	fmo-4 OE	31	13	0	0
EDTA fmo-4 OE	EDTA	fmo-4 OE	34	8	0	0
EDTA fmo-4 OE	EDTA	fmo-4 OE	36	3	0	0
EDTA fmo-4 OE	EDTA	fmo-4 OE	38	3	0	0
EDTA fmo-4 OE	EDTA	fmo-4 OE	41	1	0	0
EDTA fmo-4 OE	EDTA	fmo-4 OE	43	0	0	0
EDTA fmo-4 OE	EDTA	fmo-4 OE	45	0	0	0
EDTA fmo-4 KO	EDTA	fmo-4 KO	10	0	0	0
EDTA fmo-4 KO	EDTA	fmo-4 KO	13	4	0	0
EDTA fmo-4 KO	EDTA	fmo-4 KO	15	14	0	0
EDTA fmo-4 KO	EDTA	fmo-4 KO	17	30	0	0
EDTA fmo-4 KO	EDTA	fmo-4 KO	20	23	0	0
EDTA fmo-4 KO	EDTA	fmo-4 KO	22	19	0	0
EDTA fmo-4 KO	EDTA	fmo-4 KO	24	9	0	0
EDTA fmo-4 KO	EDTA	fmo-4 KO	27	0	0	0
EDTA fmo-4 KO	EDTA	fmo-4 KO	29	0	0	0
EDTA fmo-4 KO	EDTA	fmo-4 KO	31	0	0	0
EDTA fmo-4 KO	EDTA	fmo-4 KO	34	0	0	0
EDTA fmo-4 KO	EDTA	fmo-4 KO	36	0	0	0
EDTA fmo-4 KO	EDTA	fmo-4 KO	38	0	0	0
EDTA fmo-4 KO	EDTA	fmo-4 KO	41	0	0	0
EDTA fmo-4 KO	EDTA	fmo-4 KO	43	0	0	0
EDTA fmo-4 KO	EDTA	fmo-4 KO	45	0	0	0
Carbachol WT	Carbachol	WT	10	0	0	0
Carbachol WT	Carbachol	WT	13	0	0	0
Carbachol WT	Carbachol	WT	15	1	0	0
Carbachol WT	Carbachol	WT	17	7	0	0
Carbachol WT	Carbachol	WT	20	4	0	0
Carbachol WT	Carbachol	WT	22	6	0	0
Carbachol WT	Carbachol	WT	24	6	0	0
Carbachol WT	Carbachol	WT	27	15	0	0
Carbachol WT	Carbachol	WT	29	17	0	0
Carbachol WT	Carbachol	WT	31	22	0	0
Carbachol WT	Carbachol	WT	34	8	0	0
Carbachol WT	Carbachol	WT	36	3	0	0
Carbachol WT	Carbachol	WT	38	5	0	0
Carbachol WT	Carbachol	WT	41	0	0	0
Carbachol WT	Carbachol	WT	43	0	0	0
Carbachol WT	Carbachol	WT	45	0	0	0
Carbachol fmo-4 OE	Carbachol	fmo-4 OE	10	0	0	0
Carbachol fmo-4 OE	Carbachol	fmo-4 OE	13	0	0	0
Carbachol fmo-4 OE	Carbachol	fmo-4 OE	15	3	0	0
Carbachol fmo-4 OE	Carbachol	fmo-4 OE	17	5	0	0
Carbachol fmo-4 OE	Carbachol	fmo-4 OE	20	5	0	0
Carbachol fmo-4 OE	Carbachol	fmo-4 OE	22	6	0	0
Carbachol fmo-4 OE	Carbachol	fmo-4 OE	24	8	0	0
Carbachol fmo-4 OE	Carbachol	fmo-4 OE	27	13	0	0
Carbachol fmo-4 OE	Carbachol	fmo-4 OE	29	14	0	0
Carbachol fmo-4 OE	Carbachol	fmo-4 OE	31	15	0	0
Carbachol fmo-4 OE	Carbachol	fmo-4 OE	34	10	0	0
Carbachol fmo-4 OE	Carbachol	fmo-4 OE	36	5	0	0
Carbachol fmo-4 OE	Carbachol	fmo-4 OE	38	10	0	0
Carbachol fmo-4 OE	Carbachol	fmo-4 OE	41	1	0	0
Carbachol fmo-4 OE	Carbachol	fmo-4 OE	43	0	0	0
Carbachol fmo-4 OE	Carbachol	fmo-4 OE	45	0	0	0
Carbachol fmo-4 KO	Carbachol	fmo-4 KO	10	0	0	0
Carbachol fmo-4 KO	Carbachol	fmo-4 KO	13	6	0	0
Carbachol fmo-4 KO	Carbachol	fmo-4 KO	15	17	0	0
Carbachol fmo-4 KO	Carbachol	fmo-4 KO	17	22	0	0
Carbachol fmo-4 KO	Carbachol	fmo-4 KO	20	26	0	0
Carbachol fmo-4 KO	Carbachol	fmo-4 KO	22	11	0	0
Carbachol fmo-4 KO	Carbachol	fmo-4 KO	24	22	0	0
Carbachol fmo-4 KO	Carbachol	fmo-4 KO	27	8	0	0
Carbachol fmo-4 KO	Carbachol	fmo-4 KO	29	0	0	0
Carbachol fmo-4 KO	Carbachol	fmo-4 KO	31	0	0	0
Carbachol fmo-4 KO	Carbachol	fmo-4 KO	34	0	0	0
Carbachol fmo-4 KO	Carbachol	fmo-4 KO	36	0	0	0
Carbachol fmo-4 KO	Carbachol	fmo-4 KO	38	0	0	0
Carbachol fmo-4 KO	Carbachol	fmo-4 KO	41	0	0	0
Carbachol fmo-4 KO	Carbachol	fmo-4 KO	43	0	0	0
Carbachol fmo-4 KO	Carbachol	fmo-4 KO	45	0	0	0
