# Supplementary material for: fmo-4 promotes longevity and stress resistance via ER to mitochondria calcium regulation in C. elegans
Source: eLife journal article supplement (doi:10.7554/elife.99971), 2024-08-27
Supplement: data3 [file cox regression Carb and EDTA rep 3.xlsx]

## Sheet: data
condition	Plate	genotype	day	dead normal	dead rupture	censored
water WT	water	WT	10	0	0	0
water WT	water	WT	13	0	0	0
water WT	water	WT	15	0	0	0
water WT	water	WT	17	1	0	0
water WT	water	WT	20	19	0	0
water WT	water	WT	22	14	0	0
water WT	water	WT	24	15	0	0
water WT	water	WT	27	26	0	0
water WT	water	WT	29	8	0	0
water WT	water	WT	31	5	0	0
water WT	water	WT	34	0	0	0
water WT	water	WT	36	0	0	0
water WT	water	WT	38	0	0	0
water WT	water	WT	41	0	0	0
water WT	water	WT	43	0	0	0
water WT	water	WT	45	0	0	0
water fmo-4 OE	water	fmo-4 OE	10	0	0	0
water fmo-4 OE	water	fmo-4 OE	13	0	0	0
water fmo-4 OE	water	fmo-4 OE	15	2	0	0
water fmo-4 OE	water	fmo-4 OE	17	0	0	0
water fmo-4 OE	water	fmo-4 OE	20	2	0	0
water fmo-4 OE	water	fmo-4 OE	22	5	0	0
water fmo-4 OE	water	fmo-4 OE	24	12	0	0
water fmo-4 OE	water	fmo-4 OE	27	6	0	0
water fmo-4 OE	water	fmo-4 OE	29	16	0	0
water fmo-4 OE	water	fmo-4 OE	31	20	0	0
water fmo-4 OE	water	fmo-4 OE	34	13	0	0
water fmo-4 OE	water	fmo-4 OE	36	6	0	0
water fmo-4 OE	water	fmo-4 OE	38	7	0	0
water fmo-4 OE	water	fmo-4 OE	41	0	0	0
water fmo-4 OE	water	fmo-4 OE	43	0	0	0
water fmo-4 OE	water	fmo-4 OE	45	0	0	0
water fmo-4 KO	water	fmo-4 KO	10	0	0	0
water fmo-4 KO	water	fmo-4 KO	13	0	0	0
water fmo-4 KO	water	fmo-4 KO	15	4	0	0
water fmo-4 KO	water	fmo-4 KO	17	16	0	0
water fmo-4 KO	water	fmo-4 KO	20	27	0	0
water fmo-4 KO	water	fmo-4 KO	22	10	0	0
water fmo-4 KO	water	fmo-4 KO	24	24	0	0
water fmo-4 KO	water	fmo-4 KO	27	7	0	0
water fmo-4 KO	water	fmo-4 KO	29	5	0	0
water fmo-4 KO	water	fmo-4 KO	31	1	0	0
water fmo-4 KO	water	fmo-4 KO	34	0	0	0
water fmo-4 KO	water	fmo-4 KO	36	0	0	0
water fmo-4 KO	water	fmo-4 KO	38	0	0	0
water fmo-4 KO	water	fmo-4 KO	41	0	0	0
water fmo-4 KO	water	fmo-4 KO	43	0	0	0
water fmo-4 KO	water	fmo-4 KO	45	0	0	0
EDTA WT	EDTA	WT	10	0	0	0
EDTA WT	EDTA	WT	13	1	0	0
EDTA WT	EDTA	WT	15	0	0	0
EDTA WT	EDTA	WT	17	2	0	0
EDTA WT	EDTA	WT	20	6	0	0
EDTA WT	EDTA	WT	22	8	0	0
EDTA WT	EDTA	WT	24	27	0	0
EDTA WT	EDTA	WT	27	15	0	0
EDTA WT	EDTA	WT	29	21	0	0
EDTA WT	EDTA	WT	31	18	0	0
EDTA WT	EDTA	WT	34	5	0	0
EDTA WT	EDTA	WT	36	1	0	0
EDTA WT	EDTA	WT	38	0	0	0
EDTA WT	EDTA	WT	41	0	0	0
EDTA WT	EDTA	WT	43	0	0	0
EDTA WT	EDTA	WT	45	0	0	0
EDTA fmo-4 OE	EDTA	fmo-4 OE	10	0	0	0
EDTA fmo-4 OE	EDTA	fmo-4 OE	13	0	0	0
EDTA fmo-4 OE	EDTA	fmo-4 OE	15	1	0	0
EDTA fmo-4 OE	EDTA	fmo-4 OE	17	1	0	0
EDTA fmo-4 OE	EDTA	fmo-4 OE	20	5	0	0
EDTA fmo-4 OE	EDTA	fmo-4 OE	22	5	0	0
EDTA fmo-4 OE	EDTA	fmo-4 OE	24	6	0	0
EDTA fmo-4 OE	EDTA	fmo-4 OE	27	16	0	0
EDTA fmo-4 OE	EDTA	fmo-4 OE	29	13	0	0
EDTA fmo-4 OE	EDTA	fmo-4 OE	31	22	0	0
EDTA fmo-4 OE	EDTA	fmo-4 OE	34	17	0	0
EDTA fmo-4 OE	EDTA	fmo-4 OE	36	7	0	0
EDTA fmo-4 OE	EDTA	fmo-4 OE	38	2	0	0
EDTA fmo-4 OE	EDTA	fmo-4 OE	41	0	0	0
EDTA fmo-4 OE	EDTA	fmo-4 OE	43	0	0	0
EDTA fmo-4 OE	EDTA	fmo-4 OE	45	0	0	0
EDTA fmo-4 KO	EDTA	fmo-4 KO	10	0	0	0
EDTA fmo-4 KO	EDTA	fmo-4 KO	13	0	0	0
EDTA fmo-4 KO	EDTA	fmo-4 KO	15	5	0	0
EDTA fmo-4 KO	EDTA	fmo-4 KO	17	17	0	0
EDTA fmo-4 KO	EDTA	fmo-4 KO	20	26	0	0
EDTA fmo-4 KO	EDTA	fmo-4 KO	22	35	0	0
EDTA fmo-4 KO	EDTA	fmo-4 KO	24	31	0	0
EDTA fmo-4 KO	EDTA	fmo-4 KO	27	23	0	0
EDTA fmo-4 KO	EDTA	fmo-4 KO	29	0	0	0
EDTA fmo-4 KO	EDTA	fmo-4 KO	31	0	0	0
EDTA fmo-4 KO	EDTA	fmo-4 KO	34	0	0	0
EDTA fmo-4 KO	EDTA	fmo-4 KO	36	0	0	0
EDTA fmo-4 KO	EDTA	fmo-4 KO	38	0	0	0
EDTA fmo-4 KO	EDTA	fmo-4 KO	41	0	0	0
EDTA fmo-4 KO	EDTA	fmo-4 KO	43	0	0	0
EDTA fmo-4 KO	EDTA	fmo-4 KO	45	0	0	0
Carbachol WT	Carbachol	WT	10	0	0	0
Carbachol WT	Carbachol	WT	13	0	0	0
Carbachol WT	Carbachol	WT	15	2	0	0
Carbachol WT	Carbachol	WT	17	3	0	0
Carbachol WT	Carbachol	WT	20	5	0	0
Carbachol WT	Carbachol	WT	22	7	0	0
Carbachol WT	Carbachol	WT	24	12	0	0
Carbachol WT	Carbachol	WT	27	10	0	0
Carbachol WT	Carbachol	WT	29	20	0	0
Carbachol WT	Carbachol	WT	31	8	0	0
Carbachol WT	Carbachol	WT	34	1	0	0
Carbachol WT	Carbachol	WT	36	0	0	0
Carbachol WT	Carbachol	WT	38	0	0	0
Carbachol WT	Carbachol	WT	41	0	0	0
Carbachol WT	Carbachol	WT	43	0	0	0
Carbachol WT	Carbachol	WT	45	0	0	0
Carbachol fmo-4 OE	Carbachol	fmo-4 OE	10	0	0	0
Carbachol fmo-4 OE	Carbachol	fmo-4 OE	13	0	0	0
Carbachol fmo-4 OE	Carbachol	fmo-4 OE	15	0	0	0
Carbachol fmo-4 OE	Carbachol	fmo-4 OE	17	2	0	0
Carbachol fmo-4 OE	Carbachol	fmo-4 OE	20	8	0	0
Carbachol fmo-4 OE	Carbachol	fmo-4 OE	22	9	0	0
Carbachol fmo-4 OE	Carbachol	fmo-4 OE	24	8	0	0
Carbachol fmo-4 OE	Carbachol	fmo-4 OE	27	12	0	0
Carbachol fmo-4 OE	Carbachol	fmo-4 OE	29	9	0	0
Carbachol fmo-4 OE	Carbachol	fmo-4 OE	31	7	0	0
Carbachol fmo-4 OE	Carbachol	fmo-4 OE	34	2	0	0
Carbachol fmo-4 OE	Carbachol	fmo-4 OE	36	0	0	0
Carbachol fmo-4 OE	Carbachol	fmo-4 OE	38	0	0	0
Carbachol fmo-4 OE	Carbachol	fmo-4 OE	41	0	0	0
Carbachol fmo-4 OE	Carbachol	fmo-4 OE	43	0	0	0
Carbachol fmo-4 OE	Carbachol	fmo-4 OE	45	0	0	0
Carbachol fmo-4 KO	Carbachol	fmo-4 KO	10	0	0	0
Carbachol fmo-4 KO	Carbachol	fmo-4 KO	13	0	0	0
Carbachol fmo-4 KO	Carbachol	fmo-4 KO	15	4	0	0
Carbachol fmo-4 KO	Carbachol	fmo-4 KO	17	21	0	0
Carbachol fmo-4 KO	Carbachol	fmo-4 KO	20	33	0	0
Carbachol fmo-4 KO	Carbachol	fmo-4 KO	22	26	0	0
Carbachol fmo-4 KO	Carbachol	fmo-4 KO	24	12	0	0
Carbachol fmo-4 KO	Carbachol	fmo-4 KO	27	1	0	0
Carbachol fmo-4 KO	Carbachol	fmo-4 KO	29	0	0	0
Carbachol fmo-4 KO	Carbachol	fmo-4 KO	31	0	0	0
Carbachol fmo-4 KO	Carbachol	fmo-4 KO	34	0	0	0
Carbachol fmo-4 KO	Carbachol	fmo-4 KO	36	0	0	0
Carbachol fmo-4 KO	Carbachol	fmo-4 KO	38	0	0	0
Carbachol fmo-4 KO	Carbachol	fmo-4 KO	41	0	0	0
Carbachol fmo-4 KO	Carbachol	fmo-4 KO	43	0	0	0
Carbachol fmo-4 KO	Carbachol	fmo-4 KO	45	0	0	0
