# Supplementary material for: fmo-4 promotes longevity and stress resistance via ER to mitochondria calcium regulation in C. elegans
Source: eLife journal article supplement (doi:10.7554/elife.99971), 2024-08-27
Supplement: data3 [file cox regression DR rep 1.xlsx]

## Sheet: data
condition	Plate	genotype	day	dead normal	dead rupture	censored
Fed WT	Fed	WT	10	0	0	0
Fed WT	Fed	WT	12	6	0	0
Fed WT	Fed	WT	14	5	0	0
Fed WT	Fed	WT	17	11	0	0
Fed WT	Fed	WT	19	13	0	0
Fed WT	Fed	WT	21	10	0	0
Fed WT	Fed	WT	24	12	0	0
Fed WT	Fed	WT	26	16	0	0
Fed WT	Fed	WT	28	10	0	0
Fed WT	Fed	WT	31	1	0	0
Fed WT	Fed	WT	33	0	0	0
Fed WT	Fed	WT	35	0	0	0
Fed WT	Fed	WT	38	0	0	0
Fed WT	Fed	WT	40	0	0	0
Fed WT	Fed	WT	42	0	0	0
Fed WT	Fed	WT	45	0	0	0
Fed fmo-4 OE	Fed	fmo-4 OE	10	0	0	0
Fed fmo-4 OE	Fed	fmo-4 OE	12	4	0	0
Fed fmo-4 OE	Fed	fmo-4 OE	14	3	0	0
Fed fmo-4 OE	Fed	fmo-4 OE	17	5	0	0
Fed fmo-4 OE	Fed	fmo-4 OE	19	8	0	0
Fed fmo-4 OE	Fed	fmo-4 OE	21	11	0	0
Fed fmo-4 OE	Fed	fmo-4 OE	24	8	0	0
Fed fmo-4 OE	Fed	fmo-4 OE	26	13	0	0
Fed fmo-4 OE	Fed	fmo-4 OE	28	17	0	0
Fed fmo-4 OE	Fed	fmo-4 OE	31	10	0	0
Fed fmo-4 OE	Fed	fmo-4 OE	33	9	0	0
Fed fmo-4 OE	Fed	fmo-4 OE	35	1	0	0
Fed fmo-4 OE	Fed	fmo-4 OE	38	0	0	0
Fed fmo-4 OE	Fed	fmo-4 OE	40	0	0	0
Fed fmo-4 OE	Fed	fmo-4 OE	42	0	0	0
Fed fmo-4 OE	Fed	fmo-4 OE	45	0	0	0
Fed fmo-4 KO	Fed	fmo-4 KO	10	0	0	0
Fed fmo-4 KO	Fed	fmo-4 KO	12	7	0	0
Fed fmo-4 KO	Fed	fmo-4 KO	14	8	0	0
Fed fmo-4 KO	Fed	fmo-4 KO	17	16	0	0
Fed fmo-4 KO	Fed	fmo-4 KO	19	17	0	0
Fed fmo-4 KO	Fed	fmo-4 KO	21	17	0	0
Fed fmo-4 KO	Fed	fmo-4 KO	24	23	0	0
Fed fmo-4 KO	Fed	fmo-4 KO	26	23	0	0
Fed fmo-4 KO	Fed	fmo-4 KO	28	14	0	0
Fed fmo-4 KO	Fed	fmo-4 KO	31	6	0	0
Fed fmo-4 KO	Fed	fmo-4 KO	33	0	0	0
Fed fmo-4 KO	Fed	fmo-4 KO	35	0	0	0
Fed fmo-4 KO	Fed	fmo-4 KO	38	0	0	0
Fed fmo-4 KO	Fed	fmo-4 KO	40	0	0	0
Fed fmo-4 KO	Fed	fmo-4 KO	42	0	0	0
Fed fmo-4 KO	Fed	fmo-4 KO	45	0	0	0
DR WT	DR	WT	10	0	0	0
DR WT	DR	WT	12	3	0	0
DR WT	DR	WT	14	1	0	0
DR WT	DR	WT	17	2	0	0
DR WT	DR	WT	19	3	0	0
DR WT	DR	WT	21	3	0	0
DR WT	DR	WT	24	2	0	0
DR WT	DR	WT	26	3	0	0
DR WT	DR	WT	28	5	0	0
DR WT	DR	WT	31	3	0	0
DR WT	DR	WT	33	3	0	0
DR WT	DR	WT	35	9	0	0
DR WT	DR	WT	38	1	0	0
DR WT	DR	WT	40	1	0	0
DR WT	DR	WT	42	0	0	0
DR WT	DR	WT	45	0	0	0
DR fmo-4 OE	DR	fmo-4 OE	10	0	0	0
DR fmo-4 OE	DR	fmo-4 OE	12	5	0	0
DR fmo-4 OE	DR	fmo-4 OE	14	5	0	0
DR fmo-4 OE	DR	fmo-4 OE	17	4	0	0
DR fmo-4 OE	DR	fmo-4 OE	19	5	0	0
DR fmo-4 OE	DR	fmo-4 OE	21	5	0	0
DR fmo-4 OE	DR	fmo-4 OE	24	6	0	0
DR fmo-4 OE	DR	fmo-4 OE	26	7	0	0
DR fmo-4 OE	DR	fmo-4 OE	28	13	0	0
DR fmo-4 OE	DR	fmo-4 OE	31	12	0	0
DR fmo-4 OE	DR	fmo-4 OE	33	16	0	0
DR fmo-4 OE	DR	fmo-4 OE	35	18	0	0
DR fmo-4 OE	DR	fmo-4 OE	38	11	0	0
DR fmo-4 OE	DR	fmo-4 OE	40	4	0	0
DR fmo-4 OE	DR	fmo-4 OE	42	0	0	0
DR fmo-4 OE	DR	fmo-4 OE	45	0	0	0
DR fmo-4 KO	DR	fmo-4 KO	10	0	0	0
DR fmo-4 KO	DR	fmo-4 KO	12	3	0	0
DR fmo-4 KO	DR	fmo-4 KO	14	4	0	0
DR fmo-4 KO	DR	fmo-4 KO	17	6	0	0
DR fmo-4 KO	DR	fmo-4 KO	19	8	0	0
DR fmo-4 KO	DR	fmo-4 KO	21	9	0	0
DR fmo-4 KO	DR	fmo-4 KO	24	23	0	0
DR fmo-4 KO	DR	fmo-4 KO	26	25	0	0
DR fmo-4 KO	DR	fmo-4 KO	28	19	0	0
DR fmo-4 KO	DR	fmo-4 KO	31	11	0	0
DR fmo-4 KO	DR	fmo-4 KO	33	3	0	0
DR fmo-4 KO	DR	fmo-4 KO	35	0	0	0
DR fmo-4 KO	DR	fmo-4 KO	38	0	0	0
DR fmo-4 KO	DR	fmo-4 KO	40	0	0	0
DR fmo-4 KO	DR	fmo-4 KO	42	0	0	0
DR fmo-4 KO	DR	fmo-4 KO	45	0	0	0
