# Supplementary material for: fmo-4 promotes longevity and stress resistance via ER to mitochondria calcium regulation in C. elegans
Source: eLife journal article supplement (doi:10.7554/elife.99971), 2024-08-27
Supplement: data3 [file cox regression DR rep 3.xlsx]

## Sheet: data
condition	genotype	fed DR	technical replicate	day	dead normal	dead rupture	censored
WT fed	WT	fed	A	10	0	0	0
WT fed	WT	fed	A	12	1	0	0
WT fed	WT	fed	A	14	6	0	0
WT fed	WT	fed	A	17	15	0	2
WT fed	WT	fed	A	19	11	0	0
WT fed	WT	fed	A	21	17	0	0
WT fed	WT	fed	A	24	15	0	0
WT fed	WT	fed	A	26	4	0	0
WT fed	WT	fed	A	28	3	0	0
WT fed	WT	fed	B	10	0	0	0
WT fed	WT	fed	B	12	2	0	0
WT fed	WT	fed	B	14	5	0	0
WT fed	WT	fed	B	17	6	0	0
WT fed	WT	fed	B	19	14	0	0
WT fed	WT	fed	B	21	13	0	0
WT fed	WT	fed	B	24	12	0	0
WT fed	WT	fed	B	26	7	0	0
WT fed	WT	fed	B	28	3	0	0
WT fed	WT	fed	B	31	3	0	1
WT DR	WT	DR	A	10	0	0	0
WT DR	WT	DR	A	12	0	0	0
WT DR	WT	DR	A	14	7	0	0
WT DR	WT	DR	A	17	3	0	0
WT DR	WT	DR	A	19	1	0	0
WT DR	WT	DR	A	21	2	0	0
WT DR	WT	DR	A	24	2	0	0
WT DR	WT	DR	A	26	2	0	0
WT DR	WT	DR	A	28	6	0	0
WT DR	WT	DR	A	31	9	0	0
WT DR	WT	DR	B	10	0	0	0
WT DR	WT	DR	B	12	0	0	0
WT DR	WT	DR	B	14	3	0	0
WT DR	WT	DR	B	17	1	0	0
WT DR	WT	DR	B	19	2	0	0
WT DR	WT	DR	B	21	4	0	0
WT DR	WT	DR	B	24	5	0	0
WT DR	WT	DR	B	26	3	0	0
WT DR	WT	DR	B	28	5	0	0
WT DR	WT	DR	B	31	21	0	0
WT DR	WT	DR	A	33	10	0	0
WT DR	WT	DR	A	35	5	0	0
WT DR	WT	DR	A	38	8	0	0
WT DR	WT	DR	A	40	1	0	0
WT DR	WT	DR	B	33	18	0	0
WT DR	WT	DR	B	35	14	0	0
WT DR	WT	DR	B	38	9	0	0
WT DR	WT	DR	B	40	4	0	0
fmo-4 KO fed	fmo-4 KO	fed	A	10	0	0	0
fmo-4 KO fed	fmo-4 KO	fed	A	12	0	0	0
fmo-4 KO fed	fmo-4 KO	fed	A	14	0	0	1
fmo-4 KO fed	fmo-4 KO	fed	A	17	3	0	0
fmo-4 KO fed	fmo-4 KO	fed	A	19	4	0	0
fmo-4 KO fed	fmo-4 KO	fed	A	21	12	0	0
fmo-4 KO fed	fmo-4 KO	fed	A	24	10	0	0
fmo-4 KO fed	fmo-4 KO	fed	A	26	8	0	0
fmo-4 KO fed	fmo-4 KO	fed	A	28	4	0	0
fmo-4 KO fed	fmo-4 KO	fed	A	31	1	0	0
fmo-4 KO fed	fmo-4 KO	fed	B	10	0	0	1
fmo-4 KO fed	fmo-4 KO	fed	B	12	1	0	0
fmo-4 KO fed	fmo-4 KO	fed	B	14	0	0	1
fmo-4 KO fed	fmo-4 KO	fed	B	17	0	0	0
fmo-4 KO fed	fmo-4 KO	fed	B	19	6	0	0
fmo-4 KO fed	fmo-4 KO	fed	B	21	16	0	0
fmo-4 KO fed	fmo-4 KO	fed	B	24	5	0	0
fmo-4 KO fed	fmo-4 KO	fed	B	26	4	0	0
fmo-4 KO fed	fmo-4 KO	fed	B	28	4	0	0
fmo-4 KO fed	fmo-4 KO	fed	B	31	2	0	0
fmo-4 KO DR	fmo-4 KO	DR	A	10	0	0	0
fmo-4 KO DR	fmo-4 KO	DR	A	12	0	0	0
fmo-4 KO DR	fmo-4 KO	DR	A	14	0	0	0
fmo-4 KO DR	fmo-4 KO	DR	A	17	4	0	0
fmo-4 KO DR	fmo-4 KO	DR	A	19	7	0	0
fmo-4 KO DR	fmo-4 KO	DR	A	21	4	0	0
fmo-4 KO DR	fmo-4 KO	DR	A	24	4	0	0
fmo-4 KO DR	fmo-4 KO	DR	A	26	9	0	0
fmo-4 KO DR	fmo-4 KO	DR	A	28	8	0	0
fmo-4 KO DR	fmo-4 KO	DR	A	31	12	0	0
fmo-4 KO DR	fmo-4 KO	DR	A	33	6	0	0
fmo-4 KO DR	fmo-4 KO	DR	A	35	3	0	0
fmo-4 KO DR	fmo-4 KO	DR	A	38	1	0	0
fmo-4 OE fed	fmo-4 OE	fed	A	10	0	0	0
fmo-4 OE fed	fmo-4 OE	fed	A	12	0	0	0
fmo-4 OE fed	fmo-4 OE	fed	A	14	0	0	0
fmo-4 OE fed	fmo-4 OE	fed	A	17	0	0	0
fmo-4 OE fed	fmo-4 OE	fed	A	19	2	0	0
fmo-4 OE fed	fmo-4 OE	fed	A	21	1	0	0
fmo-4 OE fed	fmo-4 OE	fed	A	24	5	0	0
fmo-4 OE fed	fmo-4 OE	fed	A	26	5	0	0
fmo-4 OE fed	fmo-4 OE	fed	A	28	14	0	0
fmo-4 OE fed	fmo-4 OE	fed	A	31	8	0	0
fmo-4 OE fed	fmo-4 OE	fed	A	33	3	0	0
fmo-4 OE fed	fmo-4 OE	fed	A	35	3	0	0
fmo-4 OE fed	fmo-4 OE	fed	A	38	2	0	0
fmo-4 OE fed	fmo-4 OE	fed	B	10	0	0	0
fmo-4 OE fed	fmo-4 OE	fed	B	12	0	0	0
fmo-4 OE fed	fmo-4 OE	fed	B	14	0	0	0
fmo-4 OE fed	fmo-4 OE	fed	B	17	3	0	0
fmo-4 OE fed	fmo-4 OE	fed	B	19	5	0	0
fmo-4 OE fed	fmo-4 OE	fed	B	21	5	0	0
fmo-4 OE fed	fmo-4 OE	fed	B	24	10	0	0
fmo-4 OE fed	fmo-4 OE	fed	B	26	11	0	0
fmo-4 OE fed	fmo-4 OE	fed	B	28	9	0	0
fmo-4 OE fed	fmo-4 OE	fed	B	31	5	0	0
fmo-4 OE fed	fmo-4 OE	fed	B	33	4	0	0
fmo-4 OE fed	fmo-4 OE	fed	B	35	2	0	0
fmo-4 OE DR	fmo-4 OE	DR	A	10	0	0	0
fmo-4 OE DR	fmo-4 OE	DR	A	12	0	0	0
fmo-4 OE DR	fmo-4 OE	DR	A	14	2	0	0
fmo-4 OE DR	fmo-4 OE	DR	A	17	1	0	0
fmo-4 OE DR	fmo-4 OE	DR	A	19	0	0	0
fmo-4 OE DR	fmo-4 OE	DR	A	21	0	0	0
fmo-4 OE DR	fmo-4 OE	DR	A	24	3	0	0
fmo-4 OE DR	fmo-4 OE	DR	A	26	5	0	0
fmo-4 OE DR	fmo-4 OE	DR	A	28	4	0	0
fmo-4 OE DR	fmo-4 OE	DR	A	31	2	0	0
fmo-4 OE DR	fmo-4 OE	DR	A	33	8	0	0
fmo-4 OE DR	fmo-4 OE	DR	A	35	9	0	0
fmo-4 OE DR	fmo-4 OE	DR	A	38	7	0	0
fmo-4 OE DR	fmo-4 OE	DR	A	40	3	0	0
fmo-4 OE DR	fmo-4 OE	DR	A	42	2	0	0
fmo-4 OE DR	fmo-4 OE	DR	B	10	0	0	0
fmo-4 OE DR	fmo-4 OE	DR	B	12	0	0	0
fmo-4 OE DR	fmo-4 OE	DR	B	14	0	0	0
fmo-4 OE DR	fmo-4 OE	DR	B	17	0	0	0
fmo-4 OE DR	fmo-4 OE	DR	B	19	1	0	0
fmo-4 OE DR	fmo-4 OE	DR	B	21	1	0	0
fmo-4 OE DR	fmo-4 OE	DR	B	24	5	0	0
fmo-4 OE DR	fmo-4 OE	DR	B	26	3	0	0
fmo-4 OE DR	fmo-4 OE	DR	B	28	3	0	0
fmo-4 OE DR	fmo-4 OE	DR	B	31	8	0	0
fmo-4 OE DR	fmo-4 OE	DR	B	33	14	0	0
fmo-4 OE DR	fmo-4 OE	DR	B	35	8	0	0
fmo-4 OE DR	fmo-4 OE	DR	B	38	4	0	0
fmo-4 OE DR	fmo-4 OE	DR	B	40	4	0	0
