# Supplementary material for: fmo-4 promotes longevity and stress resistance via ER to mitochondria calcium regulation in C. elegans
Source: eLife journal article supplement (doi:10.7554/elife.99971), 2024-08-27
Supplement: data3 [file cox regression EV ATF6 CRT1 MCU1 ITR1 PQ assay rep 1.xlsx]

## Sheet: data
condition	RNAi	genotype	day	dead normal	dead rupture	censored
EV WT	EV	WT	0	0	0	0
EV WT	EV	WT	1	3	0	0
EV WT	EV	WT	5	13	0	0
EV WT	EV	WT	7	15	0	0
EV WT	EV	WT	9	9	0	0
EV WT	EV	WT	12	15	0	0
EV WT	EV	WT	14	4	0	0
EV WT	EV	WT	16	0	0	0
EV WT	EV	WT	19	0	0	0
EV WT	EV	WT	21	0	0	0
EV WT	EV	WT	23	0	0	0
EV fmo-4 OE	EV	fmo-4 OE	0	0	0	0
EV fmo-4 OE	EV	fmo-4 OE	1	0	0	0
EV fmo-4 OE	EV	fmo-4 OE	5	11	0	0
EV fmo-4 OE	EV	fmo-4 OE	7	9	0	0
EV fmo-4 OE	EV	fmo-4 OE	9	7	0	0
EV fmo-4 OE	EV	fmo-4 OE	12	9	0	0
EV fmo-4 OE	EV	fmo-4 OE	14	12	0	0
EV fmo-4 OE	EV	fmo-4 OE	16	9	0	0
EV fmo-4 OE	EV	fmo-4 OE	19	14	0	0
EV fmo-4 OE	EV	fmo-4 OE	21	4	0	0
EV fmo-4 OE	EV	fmo-4 OE	23	0	0	0
EV fmo-4 KO	EV	fmo-4 KO	0	0	0	0
EV fmo-4 KO	EV	fmo-4 KO	1	4	0	0
EV fmo-4 KO	EV	fmo-4 KO	5	19	0	0
EV fmo-4 KO	EV	fmo-4 KO	7	25	0	0
EV fmo-4 KO	EV	fmo-4 KO	9	14	0	0
EV fmo-4 KO	EV	fmo-4 KO	12	21	0	0
EV fmo-4 KO	EV	fmo-4 KO	14	5	0	0
EV fmo-4 KO	EV	fmo-4 KO	16	0	0	0
EV fmo-4 KO	EV	fmo-4 KO	19	0	0	0
EV fmo-4 KO	EV	fmo-4 KO	21	0	0	0
EV fmo-4 KO	EV	fmo-4 KO	23	0	0	0
atf-6 WT	atf-6	WT	0	0	0	0
atf-6 WT	atf-6	WT	1	0	0	0
atf-6 WT	atf-6	WT	5	9	0	0
atf-6 WT	atf-6	WT	7	7	0	0
atf-6 WT	atf-6	WT	9	5	0	0
atf-6 WT	atf-6	WT	12	14	0	0
atf-6 WT	atf-6	WT	14	15	0	0
atf-6 WT	atf-6	WT	16	19	0	0
atf-6 WT	atf-6	WT	19	14	0	0
atf-6 WT	atf-6	WT	21	5	0	0
atf-6 WT	atf-6	WT	23	0	0	0
atf-6 fmo-4 OE	atf-6	fmo-4 OE	0	0	0	0
atf-6 fmo-4 OE	atf-6	fmo-4 OE	1	0	0	0
atf-6 fmo-4 OE	atf-6	fmo-4 OE	5	11	0	0
atf-6 fmo-4 OE	atf-6	fmo-4 OE	7	6	0	0
atf-6 fmo-4 OE	atf-6	fmo-4 OE	9	6	0	0
atf-6 fmo-4 OE	atf-6	fmo-4 OE	12	7	0	0
atf-6 fmo-4 OE	atf-6	fmo-4 OE	14	19	0	0
atf-6 fmo-4 OE	atf-6	fmo-4 OE	16	14	0	0
atf-6 fmo-4 OE	atf-6	fmo-4 OE	19	19	0	0
atf-6 fmo-4 OE	atf-6	fmo-4 OE	21	5	0	0
atf-6 fmo-4 OE	atf-6	fmo-4 OE	23	1	0	0
atf-6 fmo-4 KO	atf-6	fmo-4 KO	0	0	0	0
atf-6 fmo-4 KO	atf-6	fmo-4 KO	1	4	0	0
atf-6 fmo-4 KO	atf-6	fmo-4 KO	5	22	0	0
atf-6 fmo-4 KO	atf-6	fmo-4 KO	7	25	0	0
atf-6 fmo-4 KO	atf-6	fmo-4 KO	9	19	0	0
atf-6 fmo-4 KO	atf-6	fmo-4 KO	12	9	0	0
atf-6 fmo-4 KO	atf-6	fmo-4 KO	14	8	0	0
atf-6 fmo-4 KO	atf-6	fmo-4 KO	16	0	0	0
atf-6 fmo-4 KO	atf-6	fmo-4 KO	19	0	0	0
atf-6 fmo-4 KO	atf-6	fmo-4 KO	21	0	0	0
atf-6 fmo-4 KO	atf-6	fmo-4 KO	23	0	0	0
crt-1 WT	crt-1	WT	0	0	0	0
crt-1 WT	crt-1	WT	1	1	0	0
crt-1 WT	crt-1	WT	5	10	0	0
crt-1 WT	crt-1	WT	7	3	0	0
crt-1 WT	crt-1	WT	9	5	0	0
crt-1 WT	crt-1	WT	12	13	0	0
crt-1 WT	crt-1	WT	14	11	0	0
crt-1 WT	crt-1	WT	16	11	0	0
crt-1 WT	crt-1	WT	19	8	0	0
crt-1 WT	crt-1	WT	21	3	0	0
crt-1 WT	crt-1	WT	23	0	0	0
crt-1 fmo-4 OE	crt-1	fmo-4 OE	0	0	0	0
crt-1 fmo-4 OE	crt-1	fmo-4 OE	1	0	0	0
crt-1 fmo-4 OE	crt-1	fmo-4 OE	5	13	0	0
crt-1 fmo-4 OE	crt-1	fmo-4 OE	7	5	0	0
crt-1 fmo-4 OE	crt-1	fmo-4 OE	9	6	0	0
crt-1 fmo-4 OE	crt-1	fmo-4 OE	12	10	0	0
crt-1 fmo-4 OE	crt-1	fmo-4 OE	14	11	0	0
crt-1 fmo-4 OE	crt-1	fmo-4 OE	16	15	0	0
crt-1 fmo-4 OE	crt-1	fmo-4 OE	19	10	0	0
crt-1 fmo-4 OE	crt-1	fmo-4 OE	21	4	0	0
crt-1 fmo-4 OE	crt-1	fmo-4 OE	23	1	0	0
crt-1 fmo-4 KO	crt-1	fmo-4 KO	0	0	0	0
crt-1 fmo-4 KO	crt-1	fmo-4 KO	1	1	0	0
crt-1 fmo-4 KO	crt-1	fmo-4 KO	5	15	0	0
crt-1 fmo-4 KO	crt-1	fmo-4 KO	7	8	0	0
crt-1 fmo-4 KO	crt-1	fmo-4 KO	9	9	0	0
crt-1 fmo-4 KO	crt-1	fmo-4 KO	12	12	0	0
crt-1 fmo-4 KO	crt-1	fmo-4 KO	14	13	0	0
crt-1 fmo-4 KO	crt-1	fmo-4 KO	16	10	0	0
crt-1 fmo-4 KO	crt-1	fmo-4 KO	19	12	0	0
crt-1 fmo-4 KO	crt-1	fmo-4 KO	21	0	0	0
crt-1 fmo-4 KO	crt-1	fmo-4 KO	23	0	0	0
mcu-1 WT	mcu-1	WT	0	0	0	0
mcu-1 WT	mcu-1	WT	1	4	0	0
mcu-1 WT	mcu-1	WT	5	16	0	0
mcu-1 WT	mcu-1	WT	7	14	0	0
mcu-1 WT	mcu-1	WT	9	9	0	0
mcu-1 WT	mcu-1	WT	12	10	0	0
mcu-1 WT	mcu-1	WT	14	3	0	0
mcu-1 WT	mcu-1	WT	16	0	0	0
mcu-1 WT	mcu-1	WT	19	0	0	0
mcu-1 WT	mcu-1	WT	21	0	0	0
mcu-1 WT	mcu-1	WT	23	0	0	0
mcu-1 fmo-4 OE	mcu-1	fmo-4 OE	0	0	0	0
mcu-1 fmo-4 OE	mcu-1	fmo-4 OE	1	3	0	0
mcu-1 fmo-4 OE	mcu-1	fmo-4 OE	5	21	0	0
mcu-1 fmo-4 OE	mcu-1	fmo-4 OE	7	19	0	0
mcu-1 fmo-4 OE	mcu-1	fmo-4 OE	9	13	0	0
mcu-1 fmo-4 OE	mcu-1	fmo-4 OE	12	18	0	0
mcu-1 fmo-4 OE	mcu-1	fmo-4 OE	14	4	0	0
mcu-1 fmo-4 OE	mcu-1	fmo-4 OE	16	0	0	0
mcu-1 fmo-4 OE	mcu-1	fmo-4 OE	19	0	0	0
mcu-1 fmo-4 OE	mcu-1	fmo-4 OE	21	0	0	0
mcu-1 fmo-4 OE	mcu-1	fmo-4 OE	23	0	0	0
mcu-1 fmo-4 KO	mcu-1	fmo-4 KO	0	0	0	0
mcu-1 fmo-4 KO	mcu-1	fmo-4 KO	1	6	0	0
mcu-1 fmo-4 KO	mcu-1	fmo-4 KO	5	23	0	0
mcu-1 fmo-4 KO	mcu-1	fmo-4 KO	7	33	0	0
mcu-1 fmo-4 KO	mcu-1	fmo-4 KO	9	13	0	0
mcu-1 fmo-4 KO	mcu-1	fmo-4 KO	12	8	0	0
mcu-1 fmo-4 KO	mcu-1	fmo-4 KO	14	2	0	0
mcu-1 fmo-4 KO	mcu-1	fmo-4 KO	16	0	0	0
mcu-1 fmo-4 KO	mcu-1	fmo-4 KO	19	0	0	0
mcu-1 fmo-4 KO	mcu-1	fmo-4 KO	21	0	0	0
mcu-1 fmo-4 KO	mcu-1	fmo-4 KO	23	0	0	0
itr-1 WT	itr-1	WT	0	0	0	0
itr-1 WT	itr-1	WT	1	3	0	0
itr-1 WT	itr-1	WT	5	23	0	0
itr-1 WT	itr-1	WT	7	24	0	0
itr-1 WT	itr-1	WT	9	13	0	0
itr-1 WT	itr-1	WT	12	8	0	0
itr-1 WT	itr-1	WT	14	2	0	0
itr-1 WT	itr-1	WT	16	0	0	0
itr-1 WT	itr-1	WT	19	0	0	0
itr-1 WT	itr-1	WT	21	0	0	0
itr-1 WT	itr-1	WT	23	0	0	0
itr-1 fmo-4 OE	itr-1	fmo-4 OE	0	0	0	0
itr-1 fmo-4 OE	itr-1	fmo-4 OE	1	2	0	0
itr-1 fmo-4 OE	itr-1	fmo-4 OE	5	24	0	0
itr-1 fmo-4 OE	itr-1	fmo-4 OE	7	29	0	0
itr-1 fmo-4 OE	itr-1	fmo-4 OE	9	14	0	0
itr-1 fmo-4 OE	itr-1	fmo-4 OE	12	18	0	0
itr-1 fmo-4 OE	itr-1	fmo-4 OE	14	7	0	0
itr-1 fmo-4 OE	itr-1	fmo-4 OE	16	0	0	0
itr-1 fmo-4 OE	itr-1	fmo-4 OE	19	0	0	0
itr-1 fmo-4 OE	itr-1	fmo-4 OE	21	0	0	0
itr-1 fmo-4 OE	itr-1	fmo-4 OE	23	0	0	0
itr-1 fmo-4 KO	itr-1	fmo-4 KO	0	0	0	0
itr-1 fmo-4 KO	itr-1	fmo-4 KO	1	5	0	0
itr-1 fmo-4 KO	itr-1	fmo-4 KO	5	28	0	0
itr-1 fmo-4 KO	itr-1	fmo-4 KO	7	54	0	0
itr-1 fmo-4 KO	itr-1	fmo-4 KO	9	11	0	0
itr-1 fmo-4 KO	itr-1	fmo-4 KO	12	3	0	0
itr-1 fmo-4 KO	itr-1	fmo-4 KO	14	1	0	0
itr-1 fmo-4 KO	itr-1	fmo-4 KO	16	0	0	0
itr-1 fmo-4 KO	itr-1	fmo-4 KO	19	0	0	0
itr-1 fmo-4 KO	itr-1	fmo-4 KO	21	0	0	0
itr-1 fmo-4 KO	itr-1	fmo-4 KO	23	0	0	0
