# Supplementary material for: fmo-4 promotes longevity and stress resistance via ER to mitochondria calcium regulation in C. elegans
Source: eLife journal article supplement (doi:10.7554/elife.99971), 2024-08-27
Supplement: data3 [file cox regression EV ATF6 CRT1 MCU1 ITR1 PQ assay rep 3.xlsx]

## Sheet: data
condition	RNAi	genotype	day	dead normal	dead rupture	censored
EV WT	EV	WT	0	0	0	0
EV WT	EV	WT	1	7	0	0
EV WT	EV	WT	5	7	0	0
EV WT	EV	WT	7	16	0	0
EV WT	EV	WT	9	12	0	0
EV WT	EV	WT	12	10	0	0
EV WT	EV	WT	14	0	0	0
EV WT	EV	WT	16	0	0	0
EV WT	EV	WT	19	0	0	0
EV WT	EV	WT	21	0	0	0
EV WT	EV	WT	23	0	0	0
EV fmo-4 OE	EV	fmo-4 OE	0	0	0	0
EV fmo-4 OE	EV	fmo-4 OE	1	0	0	0
EV fmo-4 OE	EV	fmo-4 OE	5	4	0	0
EV fmo-4 OE	EV	fmo-4 OE	7	9	0	0
EV fmo-4 OE	EV	fmo-4 OE	9	8	0	0
EV fmo-4 OE	EV	fmo-4 OE	12	8	0	0
EV fmo-4 OE	EV	fmo-4 OE	14	5	0	0
EV fmo-4 OE	EV	fmo-4 OE	16	5	0	0
EV fmo-4 OE	EV	fmo-4 OE	19	1	0	0
EV fmo-4 OE	EV	fmo-4 OE	21	0	0	0
EV fmo-4 OE	EV	fmo-4 OE	23	0	0	0
EV fmo-4 KO	EV	fmo-4 KO	0	0	0	0
EV fmo-4 KO	EV	fmo-4 KO	1	5	0	0
EV fmo-4 KO	EV	fmo-4 KO	5	7	0	0
EV fmo-4 KO	EV	fmo-4 KO	7	20	0	0
EV fmo-4 KO	EV	fmo-4 KO	9	14	0	0
EV fmo-4 KO	EV	fmo-4 KO	12	7	0	0
EV fmo-4 KO	EV	fmo-4 KO	14	0	0	0
EV fmo-4 KO	EV	fmo-4 KO	16	0	0	0
EV fmo-4 KO	EV	fmo-4 KO	19	0	0	0
EV fmo-4 KO	EV	fmo-4 KO	21	0	0	0
EV fmo-4 KO	EV	fmo-4 KO	23	0	0	0
atf-6 WT	atf-6	WT	0	0	0	0
atf-6 WT	atf-6	WT	1	0	0	0
atf-6 WT	atf-6	WT	5	2	0	0
atf-6 WT	atf-6	WT	7	8	0	0
atf-6 WT	atf-6	WT	9	11	0	0
atf-6 WT	atf-6	WT	12	7	0	0
atf-6 WT	atf-6	WT	14	6	0	0
atf-6 WT	atf-6	WT	16	4	0	0
atf-6 WT	atf-6	WT	19	0	0	0
atf-6 WT	atf-6	WT	21	0	0	0
atf-6 WT	atf-6	WT	23	0	0	0
atf-6 fmo-4 OE	atf-6	fmo-4 OE	0	0	0	0
atf-6 fmo-4 OE	atf-6	fmo-4 OE	1	0	0	0
atf-6 fmo-4 OE	atf-6	fmo-4 OE	5	2	0	0
atf-6 fmo-4 OE	atf-6	fmo-4 OE	7	7	0	0
atf-6 fmo-4 OE	atf-6	fmo-4 OE	9	8	0	0
atf-6 fmo-4 OE	atf-6	fmo-4 OE	12	5	0	0
atf-6 fmo-4 OE	atf-6	fmo-4 OE	14	7	0	0
atf-6 fmo-4 OE	atf-6	fmo-4 OE	16	5	0	0
atf-6 fmo-4 OE	atf-6	fmo-4 OE	19	2	0	0
atf-6 fmo-4 OE	atf-6	fmo-4 OE	21	1	0	0
atf-6 fmo-4 OE	atf-6	fmo-4 OE	23	0	0	0
atf-6 fmo-4 KO	atf-6	fmo-4 KO	0	0	0	0
atf-6 fmo-4 KO	atf-6	fmo-4 KO	1	6	0	0
atf-6 fmo-4 KO	atf-6	fmo-4 KO	5	7	0	0
atf-6 fmo-4 KO	atf-6	fmo-4 KO	7	16	0	0
atf-6 fmo-4 KO	atf-6	fmo-4 KO	9	13	0	0
atf-6 fmo-4 KO	atf-6	fmo-4 KO	12	10	0	0
atf-6 fmo-4 KO	atf-6	fmo-4 KO	14	0	0	0
atf-6 fmo-4 KO	atf-6	fmo-4 KO	16	0	0	0
atf-6 fmo-4 KO	atf-6	fmo-4 KO	19	0	0	0
atf-6 fmo-4 KO	atf-6	fmo-4 KO	21	0	0	0
atf-6 fmo-4 KO	atf-6	fmo-4 KO	23	0	0	0
crt-1 WT	crt-1	WT	0	0	0	0
crt-1 WT	crt-1	WT	1	0	0	0
crt-1 WT	crt-1	WT	5	2	0	0
crt-1 WT	crt-1	WT	7	8	0	0
crt-1 WT	crt-1	WT	9	11	0	0
crt-1 WT	crt-1	WT	12	6	0	0
crt-1 WT	crt-1	WT	14	7	0	0
crt-1 WT	crt-1	WT	16	3	0	0
crt-1 WT	crt-1	WT	19	0	0	0
crt-1 WT	crt-1	WT	21	0	0	0
crt-1 WT	crt-1	WT	23	0	0	0
crt-1 fmo-4 OE	crt-1	fmo-4 OE	0	0	0	0
crt-1 fmo-4 OE	crt-1	fmo-4 OE	1	0	0	0
crt-1 fmo-4 OE	crt-1	fmo-4 OE	5	3	0	0
crt-1 fmo-4 OE	crt-1	fmo-4 OE	7	8	0	0
crt-1 fmo-4 OE	crt-1	fmo-4 OE	9	11	0	0
crt-1 fmo-4 OE	crt-1	fmo-4 OE	12	7	0	0
crt-1 fmo-4 OE	crt-1	fmo-4 OE	14	7	0	0
crt-1 fmo-4 OE	crt-1	fmo-4 OE	16	4	0	0
crt-1 fmo-4 OE	crt-1	fmo-4 OE	19	0	0	0
crt-1 fmo-4 OE	crt-1	fmo-4 OE	21	0	0	0
crt-1 fmo-4 OE	crt-1	fmo-4 OE	23	0	0	0
crt-1 fmo-4 KO	crt-1	fmo-4 KO	0	0	0	0
crt-1 fmo-4 KO	crt-1	fmo-4 KO	1	0	0	0
crt-1 fmo-4 KO	crt-1	fmo-4 KO	5	4	0	0
crt-1 fmo-4 KO	crt-1	fmo-4 KO	7	7	0	0
crt-1 fmo-4 KO	crt-1	fmo-4 KO	9	11	0	0
crt-1 fmo-4 KO	crt-1	fmo-4 KO	12	9	0	0
crt-1 fmo-4 KO	crt-1	fmo-4 KO	14	8	0	0
crt-1 fmo-4 KO	crt-1	fmo-4 KO	16	5	0	0
crt-1 fmo-4 KO	crt-1	fmo-4 KO	19	0	0	0
crt-1 fmo-4 KO	crt-1	fmo-4 KO	21	0	0	0
crt-1 fmo-4 KO	crt-1	fmo-4 KO	23	0	0	0
mcu-1 WT	mcu-1	WT	0	0	0	0
mcu-1 WT	mcu-1	WT	1	4	0	0
mcu-1 WT	mcu-1	WT	5	5	0	0
mcu-1 WT	mcu-1	WT	7	16	0	0
mcu-1 WT	mcu-1	WT	9	15	0	0
mcu-1 WT	mcu-1	WT	12	4	0	0
mcu-1 WT	mcu-1	WT	14	0	0	0
mcu-1 WT	mcu-1	WT	16	0	0	0
mcu-1 WT	mcu-1	WT	19	0	0	0
mcu-1 WT	mcu-1	WT	21	0	0	0
mcu-1 WT	mcu-1	WT	23	0	0	0
mcu-1 fmo-4 OE	mcu-1	fmo-4 OE	0	0	0	0
mcu-1 fmo-4 OE	mcu-1	fmo-4 OE	1	3	0	0
mcu-1 fmo-4 OE	mcu-1	fmo-4 OE	5	6	0	0
mcu-1 fmo-4 OE	mcu-1	fmo-4 OE	7	15	0	0
mcu-1 fmo-4 OE	mcu-1	fmo-4 OE	9	14	0	0
mcu-1 fmo-4 OE	mcu-1	fmo-4 OE	12	4	0	0
mcu-1 fmo-4 OE	mcu-1	fmo-4 OE	14	0	0	0
mcu-1 fmo-4 OE	mcu-1	fmo-4 OE	16	0	0	0
mcu-1 fmo-4 OE	mcu-1	fmo-4 OE	19	0	0	0
mcu-1 fmo-4 OE	mcu-1	fmo-4 OE	21	0	0	0
mcu-1 fmo-4 OE	mcu-1	fmo-4 OE	23	0	0	0
mcu-1 fmo-4 KO	mcu-1	fmo-4 KO	0	0	0	0
mcu-1 fmo-4 KO	mcu-1	fmo-4 KO	1	5	0	0
mcu-1 fmo-4 KO	mcu-1	fmo-4 KO	5	5	0	0
mcu-1 fmo-4 KO	mcu-1	fmo-4 KO	7	15	0	0
mcu-1 fmo-4 KO	mcu-1	fmo-4 KO	9	16	0	0
mcu-1 fmo-4 KO	mcu-1	fmo-4 KO	12	3	0	0
mcu-1 fmo-4 KO	mcu-1	fmo-4 KO	14	0	0	0
mcu-1 fmo-4 KO	mcu-1	fmo-4 KO	16	0	0	0
mcu-1 fmo-4 KO	mcu-1	fmo-4 KO	19	0	0	0
mcu-1 fmo-4 KO	mcu-1	fmo-4 KO	21	0	0	0
mcu-1 fmo-4 KO	mcu-1	fmo-4 KO	23	0	0	0
itr-1 WT	itr-1	WT	0	0	0	0
itr-1 WT	itr-1	WT	1	5	0	0
itr-1 WT	itr-1	WT	5	5	0	0
itr-1 WT	itr-1	WT	7	18	0	0
itr-1 WT	itr-1	WT	9	13	0	0
itr-1 WT	itr-1	WT	12	4	0	0
itr-1 WT	itr-1	WT	14	0	0	0
itr-1 WT	itr-1	WT	16	0	0	0
itr-1 WT	itr-1	WT	19	0	0	0
itr-1 WT	itr-1	WT	21	0	0	0
itr-1 WT	itr-1	WT	23	0	0	0
itr-1 fmo-4 OE	itr-1	fmo-4 OE	0	0	0	0
itr-1 fmo-4 OE	itr-1	fmo-4 OE	1	5	0	0
itr-1 fmo-4 OE	itr-1	fmo-4 OE	5	7	0	0
itr-1 fmo-4 OE	itr-1	fmo-4 OE	7	21	0	0
itr-1 fmo-4 OE	itr-1	fmo-4 OE	9	14	0	0
itr-1 fmo-4 OE	itr-1	fmo-4 OE	12	7	0	0
itr-1 fmo-4 OE	itr-1	fmo-4 OE	14	2	0	0
itr-1 fmo-4 OE	itr-1	fmo-4 OE	16	0	0	0
itr-1 fmo-4 OE	itr-1	fmo-4 OE	19	0	0	0
itr-1 fmo-4 OE	itr-1	fmo-4 OE	21	0	0	0
itr-1 fmo-4 OE	itr-1	fmo-4 OE	23	0	0	0
itr-1 fmo-4 KO	itr-1	fmo-4 KO	0	0	0	0
itr-1 fmo-4 KO	itr-1	fmo-4 KO	1	7	0	0
itr-1 fmo-4 KO	itr-1	fmo-4 KO	5	6	0	0
itr-1 fmo-4 KO	itr-1	fmo-4 KO	7	19	0	0
itr-1 fmo-4 KO	itr-1	fmo-4 KO	9	12	0	0
itr-1 fmo-4 KO	itr-1	fmo-4 KO	12	2	0	0
itr-1 fmo-4 KO	itr-1	fmo-4 KO	14	0	0	0
itr-1 fmo-4 KO	itr-1	fmo-4 KO	16	0	0	0
itr-1 fmo-4 KO	itr-1	fmo-4 KO	19	0	0	0
itr-1 fmo-4 KO	itr-1	fmo-4 KO	21	0	0	0
itr-1 fmo-4 KO	itr-1	fmo-4 KO	23	0	0	0
