# Supplementary material for: fmo-4 promotes longevity and stress resistance via ER to mitochondria calcium regulation in C. elegans
Source: eLife journal article supplement (doi:10.7554/elife.99971), 2024-08-27
Supplement: data3 [file cox regression EV ATF6 rep 1.xlsx]

## Sheet: data
condition	RNAi	genotype	day	dead normal	dead rupture	censored
EV WT	EV	WT	9	0	0	0
EV WT	EV	WT	13	1	0	0
EV WT	EV	WT	15	4	0	0
EV WT	EV	WT	17	7	0	0
EV WT	EV	WT	20	13	0	0
EV WT	EV	WT	22	12	0	0
EV WT	EV	WT	24	31	0	0
EV WT	EV	WT	27	34	0	0
EV WT	EV	WT	29	9	0	0
EV WT	EV	WT	31	8	0	0
EV WT	EV	WT	34	0	0	0
EV WT	EV	WT	36	0	0	0
EV WT	EV	WT	38	0	0	0
EV WT	EV	WT	41	0	0	0
EV WT	EV	WT	43	0	0	0
EV fmo-4 OE	EV	fmo-4 OE	9	0	0	0
EV fmo-4 OE	EV	fmo-4 OE	13	2	0	0
EV fmo-4 OE	EV	fmo-4 OE	15	2	0	0
EV fmo-4 OE	EV	fmo-4 OE	17	4	0	0
EV fmo-4 OE	EV	fmo-4 OE	20	5	0	0
EV fmo-4 OE	EV	fmo-4 OE	22	6	0	0
EV fmo-4 OE	EV	fmo-4 OE	24	13	0	0
EV fmo-4 OE	EV	fmo-4 OE	27	14	0	0
EV fmo-4 OE	EV	fmo-4 OE	29	26	0	0
EV fmo-4 OE	EV	fmo-4 OE	31	19	0	0
EV fmo-4 OE	EV	fmo-4 OE	34	17	0	0
EV fmo-4 OE	EV	fmo-4 OE	36	4	0	0
EV fmo-4 OE	EV	fmo-4 OE	38	5	0	0
EV fmo-4 OE	EV	fmo-4 OE	41	0	0	0
EV fmo-4 OE	EV	fmo-4 OE	43	0	0	0
EV fmo-4 KO	EV	fmo-4 KO	9	0	0	0
EV fmo-4 KO	EV	fmo-4 KO	13	4	0	0
EV fmo-4 KO	EV	fmo-4 KO	15	7	0	0
EV fmo-4 KO	EV	fmo-4 KO	17	5	0	0
EV fmo-4 KO	EV	fmo-4 KO	20	13	0	0
EV fmo-4 KO	EV	fmo-4 KO	22	10	0	0
EV fmo-4 KO	EV	fmo-4 KO	24	27	0	0
EV fmo-4 KO	EV	fmo-4 KO	27	21	0	0
EV fmo-4 KO	EV	fmo-4 KO	29	11	0	0
EV fmo-4 KO	EV	fmo-4 KO	31	2	0	0
EV fmo-4 KO	EV	fmo-4 KO	34	0	0	0
EV fmo-4 KO	EV	fmo-4 KO	36	0	0	0
EV fmo-4 KO	EV	fmo-4 KO	38	0	0	0
EV fmo-4 KO	EV	fmo-4 KO	41	0	0	0
EV fmo-4 KO	EV	fmo-4 KO	43	0	0	0
atf-6 WT	atf-6	WT	9	0	0	0
atf-6 WT	atf-6	WT	13	0	0	0
atf-6 WT	atf-6	WT	15	0	0	0
atf-6 WT	atf-6	WT	17	3	0	0
atf-6 WT	atf-6	WT	20	7	0	0
atf-6 WT	atf-6	WT	22	8	0	0
atf-6 WT	atf-6	WT	24	18	0	0
atf-6 WT	atf-6	WT	27	17	0	0
atf-6 WT	atf-6	WT	29	21	0	0
atf-6 WT	atf-6	WT	31	13	0	0
atf-6 WT	atf-6	WT	34	15	0	0
atf-6 WT	atf-6	WT	36	2	0	0
atf-6 WT	atf-6	WT	38	1	0	0
atf-6 WT	atf-6	WT	41	0	0	0
atf-6 WT	atf-6	WT	43	0	0	0
atf-6 fmo-4 OE	atf-6	fmo-4 OE	9	0	0	0
atf-6 fmo-4 OE	atf-6	fmo-4 OE	13	3	0	0
atf-6 fmo-4 OE	atf-6	fmo-4 OE	15	1	0	0
atf-6 fmo-4 OE	atf-6	fmo-4 OE	17	9	0	0
atf-6 fmo-4 OE	atf-6	fmo-4 OE	20	4	0	0
atf-6 fmo-4 OE	atf-6	fmo-4 OE	22	6	0	0
atf-6 fmo-4 OE	atf-6	fmo-4 OE	24	10	0	0
atf-6 fmo-4 OE	atf-6	fmo-4 OE	27	14	0	0
atf-6 fmo-4 OE	atf-6	fmo-4 OE	29	9	0	0
atf-6 fmo-4 OE	atf-6	fmo-4 OE	31	4	0	0
atf-6 fmo-4 OE	atf-6	fmo-4 OE	34	8	0	0
atf-6 fmo-4 OE	atf-6	fmo-4 OE	36	0	0	0
atf-6 fmo-4 OE	atf-6	fmo-4 OE	38	1	0	0
atf-6 fmo-4 OE	atf-6	fmo-4 OE	41	0	0	0
atf-6 fmo-4 OE	atf-6	fmo-4 OE	43	0	0	0
atf-6 fmo-4 KO	atf-6	fmo-4 KO	9	0	0	0
atf-6 fmo-4 KO	atf-6	fmo-4 KO	13	3	0	0
atf-6 fmo-4 KO	atf-6	fmo-4 KO	15	3	0	0
atf-6 fmo-4 KO	atf-6	fmo-4 KO	17	7	0	0
atf-6 fmo-4 KO	atf-6	fmo-4 KO	20	4	0	0
atf-6 fmo-4 KO	atf-6	fmo-4 KO	22	8	0	0
atf-6 fmo-4 KO	atf-6	fmo-4 KO	24	20	0	0
atf-6 fmo-4 KO	atf-6	fmo-4 KO	27	22	0	0
atf-6 fmo-4 KO	atf-6	fmo-4 KO	29	18	0	0
atf-6 fmo-4 KO	atf-6	fmo-4 KO	31	4	0	0
atf-6 fmo-4 KO	atf-6	fmo-4 KO	34	0	0	0
atf-6 fmo-4 KO	atf-6	fmo-4 KO	36	0	0	0
atf-6 fmo-4 KO	atf-6	fmo-4 KO	38	0	0	0
atf-6 fmo-4 KO	atf-6	fmo-4 KO	41	0	0	0
atf-6 fmo-4 KO	atf-6	fmo-4 KO	43	0	0	0
