# Supplementary material for: fmo-4 promotes longevity and stress resistance via ER to mitochondria calcium regulation in C. elegans
Source: eLife journal article supplement (doi:10.7554/elife.99971), 2024-08-27
Supplement: data3 [file cox regression EV ATF6 rep 2.xlsx]

## Sheet: data
condition	RNAi	genotype	day	dead normal	dead rupture	censored
EV WT	EV	WT	10	0	0	0
EV WT	EV	WT	12	1	0	0
EV WT	EV	WT	14	4	0	0
EV WT	EV	WT	17	10	0	0
EV WT	EV	WT	19	12	0	0
EV WT	EV	WT	21	20	0	0
EV WT	EV	WT	24	30	0	0
EV WT	EV	WT	26	30	0	0
EV WT	EV	WT	28	11	0	0
EV WT	EV	WT	31	4	0	0
EV WT	EV	WT	33	0	0	0
EV WT	EV	WT	35	0	0	0
EV WT	EV	WT	38	0	0	0
EV WT	EV	WT	41	0	0	0
EV WT	EV	WT	43	0	0	0
EV fmo-4 OE	EV	fmo-4 OE	10	0	0	0
EV fmo-4 OE	EV	fmo-4 OE	12	0	0	0
EV fmo-4 OE	EV	fmo-4 OE	14	2	0	0
EV fmo-4 OE	EV	fmo-4 OE	17	2	0	0
EV fmo-4 OE	EV	fmo-4 OE	19	6	0	0
EV fmo-4 OE	EV	fmo-4 OE	21	9	0	0
EV fmo-4 OE	EV	fmo-4 OE	24	11	0	0
EV fmo-4 OE	EV	fmo-4 OE	26	18	0	0
EV fmo-4 OE	EV	fmo-4 OE	28	18	0	0
EV fmo-4 OE	EV	fmo-4 OE	31	18	0	0
EV fmo-4 OE	EV	fmo-4 OE	33	15	0	0
EV fmo-4 OE	EV	fmo-4 OE	35	7	0	0
EV fmo-4 OE	EV	fmo-4 OE	38	1	0	0
EV fmo-4 OE	EV	fmo-4 OE	41	0	0	0
EV fmo-4 OE	EV	fmo-4 OE	43	0	0	0
EV fmo-4 KO	EV	fmo-4 KO	10	0	0	0
EV fmo-4 KO	EV	fmo-4 KO	12	0	0	0
EV fmo-4 KO	EV	fmo-4 KO	14	4	0	0
EV fmo-4 KO	EV	fmo-4 KO	17	14	0	0
EV fmo-4 KO	EV	fmo-4 KO	19	19	0	0
EV fmo-4 KO	EV	fmo-4 KO	21	28	0	0
EV fmo-4 KO	EV	fmo-4 KO	24	33	0	0
EV fmo-4 KO	EV	fmo-4 KO	26	18	0	0
EV fmo-4 KO	EV	fmo-4 KO	28	5	0	0
EV fmo-4 KO	EV	fmo-4 KO	31	0	0	0
EV fmo-4 KO	EV	fmo-4 KO	33	0	0	0
EV fmo-4 KO	EV	fmo-4 KO	35	0	0	0
EV fmo-4 KO	EV	fmo-4 KO	38	0	0	0
EV fmo-4 KO	EV	fmo-4 KO	41	0	0	0
EV fmo-4 KO	EV	fmo-4 KO	43	0	0	0
atf-6 WT	atf-6	WT	10	0	0	0
atf-6 WT	atf-6	WT	12	1	0	0
atf-6 WT	atf-6	WT	14	0	0	0
atf-6 WT	atf-6	WT	17	2	0	0
atf-6 WT	atf-6	WT	19	7	0	0
atf-6 WT	atf-6	WT	21	12	0	0
atf-6 WT	atf-6	WT	24	22	0	0
atf-6 WT	atf-6	WT	26	29	0	0
atf-6 WT	atf-6	WT	28	31	0	0
atf-6 WT	atf-6	WT	31	8	0	0
atf-6 WT	atf-6	WT	33	3	0	0
atf-6 WT	atf-6	WT	35	2	0	0
atf-6 WT	atf-6	WT	38	0	0	0
atf-6 WT	atf-6	WT	41	0	0	0
atf-6 WT	atf-6	WT	43	0	0	0
atf-6 fmo-4 OE	atf-6	fmo-4 OE	10	0	0	0
atf-6 fmo-4 OE	atf-6	fmo-4 OE	12	0	0	0
atf-6 fmo-4 OE	atf-6	fmo-4 OE	14	0	0	0
atf-6 fmo-4 OE	atf-6	fmo-4 OE	17	3	0	0
atf-6 fmo-4 OE	atf-6	fmo-4 OE	19	6	0	0
atf-6 fmo-4 OE	atf-6	fmo-4 OE	21	11	0	0
atf-6 fmo-4 OE	atf-6	fmo-4 OE	24	17	0	0
atf-6 fmo-4 OE	atf-6	fmo-4 OE	26	18	0	0
atf-6 fmo-4 OE	atf-6	fmo-4 OE	28	25	0	0
atf-6 fmo-4 OE	atf-6	fmo-4 OE	31	11	0	0
atf-6 fmo-4 OE	atf-6	fmo-4 OE	33	7	0	0
atf-6 fmo-4 OE	atf-6	fmo-4 OE	35	7	0	0
atf-6 fmo-4 OE	atf-6	fmo-4 OE	38	0	0	0
atf-6 fmo-4 OE	atf-6	fmo-4 OE	41	0	0	0
atf-6 fmo-4 OE	atf-6	fmo-4 OE	43	0	0	0
atf-6 fmo-4 KO	atf-6	fmo-4 KO	10	0	0	0
atf-6 fmo-4 KO	atf-6	fmo-4 KO	12	0	0	0
atf-6 fmo-4 KO	atf-6	fmo-4 KO	14	5	0	0
atf-6 fmo-4 KO	atf-6	fmo-4 KO	17	19	0	0
atf-6 fmo-4 KO	atf-6	fmo-4 KO	19	22	0	0
atf-6 fmo-4 KO	atf-6	fmo-4 KO	21	24	0	0
atf-6 fmo-4 KO	atf-6	fmo-4 KO	24	36	0	0
atf-6 fmo-4 KO	atf-6	fmo-4 KO	26	16	0	0
atf-6 fmo-4 KO	atf-6	fmo-4 KO	28	2	0	0
atf-6 fmo-4 KO	atf-6	fmo-4 KO	31	0	0	0
atf-6 fmo-4 KO	atf-6	fmo-4 KO	33	0	0	0
atf-6 fmo-4 KO	atf-6	fmo-4 KO	35	0	0	0
atf-6 fmo-4 KO	atf-6	fmo-4 KO	38	0	0	0
atf-6 fmo-4 KO	atf-6	fmo-4 KO	41	0	0	0
atf-6 fmo-4 KO	atf-6	fmo-4 KO	43	0	0	0
