# Supplementary material for: fmo-4 promotes longevity and stress resistance via ER to mitochondria calcium regulation in C. elegans
Source: eLife journal article supplement (doi:10.7554/elife.99971), 2024-08-27
Supplement: data3 [file cox regression EV CRT1 MCU1 ITR1 rep 1.xlsx]

## Sheet: data
condition	RNAi	genotype	day	dead normal	dead rupture	censored
EV WT	EV	WT	11	3	0	0
EV WT	EV	WT	14	6	0	0
EV WT	EV	WT	16	12	0	0
EV WT	EV	WT	18	14	0	0
EV WT	EV	WT	21	11	0	0
EV WT	EV	WT	23	13	0	0
EV WT	EV	WT	25	19	0	0
EV WT	EV	WT	28	21	0	0
EV WT	EV	WT	30	20	0	0
EV WT	EV	WT	32	1	0	0
EV WT	EV	WT	35	0	0	0
EV WT	EV	WT	37	0	0	0
EV fmo-4 OE	EV	fmo-4 OE	11	0	0	0
EV fmo-4 OE	EV	fmo-4 OE	14	5	0	0
EV fmo-4 OE	EV	fmo-4 OE	16	5	0	0
EV fmo-4 OE	EV	fmo-4 OE	18	7	0	0
EV fmo-4 OE	EV	fmo-4 OE	21	9	0	0
EV fmo-4 OE	EV	fmo-4 OE	23	11	0	0
EV fmo-4 OE	EV	fmo-4 OE	25	15	0	0
EV fmo-4 OE	EV	fmo-4 OE	28	21	0	0
EV fmo-4 OE	EV	fmo-4 OE	30	19	0	0
EV fmo-4 OE	EV	fmo-4 OE	32	7	0	0
EV fmo-4 OE	EV	fmo-4 OE	35	7	0	0
EV fmo-4 OE	EV	fmo-4 OE	37	5	0	0
EV fmo-4 KO	EV	fmo-4 KO	11	5	0	0
EV fmo-4 KO	EV	fmo-4 KO	14	8	0	0
EV fmo-4 KO	EV	fmo-4 KO	16	12	0	0
EV fmo-4 KO	EV	fmo-4 KO	18	15	0	0
EV fmo-4 KO	EV	fmo-4 KO	21	17	0	0
EV fmo-4 KO	EV	fmo-4 KO	23	7	0	0
EV fmo-4 KO	EV	fmo-4 KO	25	27	0	0
EV fmo-4 KO	EV	fmo-4 KO	28	17	0	0
EV fmo-4 KO	EV	fmo-4 KO	30	3	0	0
EV fmo-4 KO	EV	fmo-4 KO	32	0	0	0
EV fmo-4 KO	EV	fmo-4 KO	35	0	0	0
EV fmo-4 KO	EV	fmo-4 KO	37	0	0	0
crt-1 WT	crt-1	WT	11	0	0	0
crt-1 WT	crt-1	WT	14	3	0	0
crt-1 WT	crt-1	WT	16	5	0	0
crt-1 WT	crt-1	WT	18	7	0	0
crt-1 WT	crt-1	WT	21	9	0	0
crt-1 WT	crt-1	WT	23	15	0	0
crt-1 WT	crt-1	WT	25	23	0	0
crt-1 WT	crt-1	WT	28	24	0	0
crt-1 WT	crt-1	WT	30	19	0	0
crt-1 WT	crt-1	WT	32	5	0	0
crt-1 WT	crt-1	WT	35	4	0	0
crt-1 WT	crt-1	WT	37	2	0	0
crt-1 fmo-4 OE	crt-1	fmo-4 OE	11	0	0	0
crt-1 fmo-4 OE	crt-1	fmo-4 OE	14	4	0	0
crt-1 fmo-4 OE	crt-1	fmo-4 OE	16	4	0	0
crt-1 fmo-4 OE	crt-1	fmo-4 OE	18	9	0	0
crt-1 fmo-4 OE	crt-1	fmo-4 OE	21	10	0	0
crt-1 fmo-4 OE	crt-1	fmo-4 OE	23	13	0	0
crt-1 fmo-4 OE	crt-1	fmo-4 OE	25	22	0	0
crt-1 fmo-4 OE	crt-1	fmo-4 OE	28	23	0	0
crt-1 fmo-4 OE	crt-1	fmo-4 OE	30	19	0	0
crt-1 fmo-4 OE	crt-1	fmo-4 OE	32	7	0	0
crt-1 fmo-4 OE	crt-1	fmo-4 OE	35	5	0	0
crt-1 fmo-4 OE	crt-1	fmo-4 OE	37	4	0	0
crt-1 fmo-4 KO	crt-1	fmo-4 KO	11	1	0	0
crt-1 fmo-4 KO	crt-1	fmo-4 KO	14	5	0	0
crt-1 fmo-4 KO	crt-1	fmo-4 KO	16	7	0	0
crt-1 fmo-4 KO	crt-1	fmo-4 KO	18	12	0	0
crt-1 fmo-4 KO	crt-1	fmo-4 KO	21	12	0	0
crt-1 fmo-4 KO	crt-1	fmo-4 KO	23	22	0	0
crt-1 fmo-4 KO	crt-1	fmo-4 KO	25	27	0	0
crt-1 fmo-4 KO	crt-1	fmo-4 KO	28	16	0	0
crt-1 fmo-4 KO	crt-1	fmo-4 KO	30	2	0	0
crt-1 fmo-4 KO	crt-1	fmo-4 KO	32	2	0	0
crt-1 fmo-4 KO	crt-1	fmo-4 KO	35	1	0	0
crt-1 fmo-4 KO	crt-1	fmo-4 KO	37	0	0	0
mcu-1 WT	mcu-1	WT	11	2	0	0
mcu-1 WT	mcu-1	WT	14	8	0	0
mcu-1 WT	mcu-1	WT	16	10	0	0
mcu-1 WT	mcu-1	WT	18	12	0	0
mcu-1 WT	mcu-1	WT	21	17	0	0
mcu-1 WT	mcu-1	WT	23	14	0	0
mcu-1 WT	mcu-1	WT	25	23	0	0
mcu-1 WT	mcu-1	WT	28	20	0	0
mcu-1 WT	mcu-1	WT	30	7	0	0
mcu-1 WT	mcu-1	WT	32	2	0	0
mcu-1 WT	mcu-1	WT	35	0	0	0
mcu-1 WT	mcu-1	WT	37	0	0	0
mcu-1 fmo-4 OE	mcu-1	fmo-4 OE	11	2	0	0
mcu-1 fmo-4 OE	mcu-1	fmo-4 OE	14	7	0	0
mcu-1 fmo-4 OE	mcu-1	fmo-4 OE	16	11	0	0
mcu-1 fmo-4 OE	mcu-1	fmo-4 OE	18	8	0	0
mcu-1 fmo-4 OE	mcu-1	fmo-4 OE	21	19	0	0
mcu-1 fmo-4 OE	mcu-1	fmo-4 OE	23	13	0	0
mcu-1 fmo-4 OE	mcu-1	fmo-4 OE	25	21	0	0
mcu-1 fmo-4 OE	mcu-1	fmo-4 OE	28	22	0	0
mcu-1 fmo-4 OE	mcu-1	fmo-4 OE	30	14	0	0
mcu-1 fmo-4 OE	mcu-1	fmo-4 OE	32	3	0	0
mcu-1 fmo-4 OE	mcu-1	fmo-4 OE	35	0	0	0
mcu-1 fmo-4 OE	mcu-1	fmo-4 OE	37	0	0	0
mcu-1 fmo-4 KO	mcu-1	fmo-4 KO	11	5	0	0
mcu-1 fmo-4 KO	mcu-1	fmo-4 KO	14	9	0	0
mcu-1 fmo-4 KO	mcu-1	fmo-4 KO	16	14	0	0
mcu-1 fmo-4 KO	mcu-1	fmo-4 KO	18	13	0	0
mcu-1 fmo-4 KO	mcu-1	fmo-4 KO	21	19	0	0
mcu-1 fmo-4 KO	mcu-1	fmo-4 KO	23	15	0	0
mcu-1 fmo-4 KO	mcu-1	fmo-4 KO	25	16	0	0
mcu-1 fmo-4 KO	mcu-1	fmo-4 KO	28	9	0	0
mcu-1 fmo-4 KO	mcu-1	fmo-4 KO	30	0	0	0
mcu-1 fmo-4 KO	mcu-1	fmo-4 KO	32	0	0	0
mcu-1 fmo-4 KO	mcu-1	fmo-4 KO	35	0	0	0
mcu-1 fmo-4 KO	mcu-1	fmo-4 KO	37	0	0	0
itr-1 WT	itr-1	WT	11	0	0	0
itr-1 WT	itr-1	WT	14	4	0	0
itr-1 WT	itr-1	WT	16	9	0	0
itr-1 WT	itr-1	WT	18	17	0	0
itr-1 WT	itr-1	WT	21	35	0	0
itr-1 WT	itr-1	WT	23	26	0	0
itr-1 WT	itr-1	WT	25	21	0	0
itr-1 WT	itr-1	WT	28	6	0	0
itr-1 WT	itr-1	WT	30	0	0	0
itr-1 WT	itr-1	WT	32	0	0	0
itr-1 WT	itr-1	WT	35	0	0	0
itr-1 WT	itr-1	WT	37	0	0	0
itr-1 fmo-4 OE	itr-1	fmo-4 OE	11	0	0	0
itr-1 fmo-4 OE	itr-1	fmo-4 OE	14	6	0	0
itr-1 fmo-4 OE	itr-1	fmo-4 OE	16	6	0	0
itr-1 fmo-4 OE	itr-1	fmo-4 OE	18	19	0	0
itr-1 fmo-4 OE	itr-1	fmo-4 OE	21	46	0	0
itr-1 fmo-4 OE	itr-1	fmo-4 OE	23	27	0	0
itr-1 fmo-4 OE	itr-1	fmo-4 OE	25	14	0	0
itr-1 fmo-4 OE	itr-1	fmo-4 OE	28	2	0	0
itr-1 fmo-4 OE	itr-1	fmo-4 OE	30	0	0	0
itr-1 fmo-4 OE	itr-1	fmo-4 OE	32	0	0	0
itr-1 fmo-4 OE	itr-1	fmo-4 OE	35	0	0	0
itr-1 fmo-4 OE	itr-1	fmo-4 OE	37	0	0	0
itr-1 fmo-4 KO	itr-1	fmo-4 KO	11	0	0	0
itr-1 fmo-4 KO	itr-1	fmo-4 KO	14	7	0	0
itr-1 fmo-4 KO	itr-1	fmo-4 KO	16	13	0	0
itr-1 fmo-4 KO	itr-1	fmo-4 KO	18	16	0	0
itr-1 fmo-4 KO	itr-1	fmo-4 KO	21	43	0	0
itr-1 fmo-4 KO	itr-1	fmo-4 KO	23	21	0	0
itr-1 fmo-4 KO	itr-1	fmo-4 KO	25	16	0	0
itr-1 fmo-4 KO	itr-1	fmo-4 KO	28	1	0	0
itr-1 fmo-4 KO	itr-1	fmo-4 KO	30	0	0	0
itr-1 fmo-4 KO	itr-1	fmo-4 KO	32	0	0	0
itr-1 fmo-4 KO	itr-1	fmo-4 KO	35	0	0	0
itr-1 fmo-4 KO	itr-1	fmo-4 KO	37	0	0	0
