# Supplementary material for: fmo-4 promotes longevity and stress resistance via ER to mitochondria calcium regulation in C. elegans
Source: eLife journal article supplement (doi:10.7554/elife.99971), 2024-08-27
Supplement: data3 [file cox regression EV CRT1 rep 3.xlsx]

## Sheet: data
condition	RNAi	genotype	day	dead normal	dead rupture	censored
EV WT	EV	WT	10	0	0	0
EV WT	EV	WT	12	0	0	0
EV WT	EV	WT	14	3	0	0
EV WT	EV	WT	17	8	0	0
EV WT	EV	WT	19	14	0	0
EV WT	EV	WT	21	15	0	0
EV WT	EV	WT	24	16	0	0
EV WT	EV	WT	26	18	0	0
EV WT	EV	WT	28	20	0	0
EV WT	EV	WT	31	23	0	0
EV WT	EV	WT	33	6	0	0
EV WT	EV	WT	35	0	0	0
EV WT	EV	WT	38	0	0	0
EV WT	EV	WT	40	0	0	0
EV fmo-4 OE	EV	fmo-4 OE	10	0	0	0
EV fmo-4 OE	EV	fmo-4 OE	12	0	0	0
EV fmo-4 OE	EV	fmo-4 OE	14	1	0	0
EV fmo-4 OE	EV	fmo-4 OE	17	3	0	0
EV fmo-4 OE	EV	fmo-4 OE	19	5	0	0
EV fmo-4 OE	EV	fmo-4 OE	21	7	0	0
EV fmo-4 OE	EV	fmo-4 OE	24	7	0	0
EV fmo-4 OE	EV	fmo-4 OE	26	5	0	0
EV fmo-4 OE	EV	fmo-4 OE	28	5	0	0
EV fmo-4 OE	EV	fmo-4 OE	31	8	0	0
EV fmo-4 OE	EV	fmo-4 OE	33	6	0	0
EV fmo-4 OE	EV	fmo-4 OE	35	5	0	0
EV fmo-4 OE	EV	fmo-4 OE	38	3	0	0
EV fmo-4 OE	EV	fmo-4 OE	40	3	0	0
EV fmo-4 KO	EV	fmo-4 KO	10	0	0	0
EV fmo-4 KO	EV	fmo-4 KO	12	4	0	0
EV fmo-4 KO	EV	fmo-4 KO	14	5	0	0
EV fmo-4 KO	EV	fmo-4 KO	17	11	0	0
EV fmo-4 KO	EV	fmo-4 KO	19	17	0	0
EV fmo-4 KO	EV	fmo-4 KO	21	18	0	0
EV fmo-4 KO	EV	fmo-4 KO	24	16	0	0
EV fmo-4 KO	EV	fmo-4 KO	26	11	0	0
EV fmo-4 KO	EV	fmo-4 KO	28	14	0	0
EV fmo-4 KO	EV	fmo-4 KO	31	5	0	0
EV fmo-4 KO	EV	fmo-4 KO	33	5	0	0
EV fmo-4 KO	EV	fmo-4 KO	35	0	0	0
EV fmo-4 KO	EV	fmo-4 KO	38	0	0	0
EV fmo-4 KO	EV	fmo-4 KO	40	0	0	0
crt-1 WT	crt-1	WT	10	0	0	0
crt-1 WT	crt-1	WT	12	0	0	0
crt-1 WT	crt-1	WT	14	2	0	0
crt-1 WT	crt-1	WT	17	7	0	0
crt-1 WT	crt-1	WT	19	9	0	0
crt-1 WT	crt-1	WT	21	6	0	0
crt-1 WT	crt-1	WT	24	7	0	0
crt-1 WT	crt-1	WT	26	14	0	0
crt-1 WT	crt-1	WT	28	10	0	0
crt-1 WT	crt-1	WT	31	14	0	0
crt-1 WT	crt-1	WT	33	13	0	0
crt-1 WT	crt-1	WT	35	16	0	0
crt-1 WT	crt-1	WT	38	8	0	0
crt-1 WT	crt-1	WT	40	2	0	0
crt-1 fmo-4 OE	crt-1	fmo-4 OE	10	0	0	0
crt-1 fmo-4 OE	crt-1	fmo-4 OE	12	2	0	0
crt-1 fmo-4 OE	crt-1	fmo-4 OE	14	4	0	0
crt-1 fmo-4 OE	crt-1	fmo-4 OE	17	5	0	0
crt-1 fmo-4 OE	crt-1	fmo-4 OE	19	7	0	0
crt-1 fmo-4 OE	crt-1	fmo-4 OE	21	5	0	0
crt-1 fmo-4 OE	crt-1	fmo-4 OE	24	7	0	0
crt-1 fmo-4 OE	crt-1	fmo-4 OE	26	3	0	0
crt-1 fmo-4 OE	crt-1	fmo-4 OE	28	6	0	0
crt-1 fmo-4 OE	crt-1	fmo-4 OE	31	10	0	0
crt-1 fmo-4 OE	crt-1	fmo-4 OE	33	11	0	0
crt-1 fmo-4 OE	crt-1	fmo-4 OE	35	12	0	0
crt-1 fmo-4 OE	crt-1	fmo-4 OE	38	5	0	0
crt-1 fmo-4 OE	crt-1	fmo-4 OE	40	2	0	0
crt-1 fmo-4 KO	crt-1	fmo-4 KO	10	0	0	0
crt-1 fmo-4 KO	crt-1	fmo-4 KO	12	5	0	0
crt-1 fmo-4 KO	crt-1	fmo-4 KO	14	6	0	0
crt-1 fmo-4 KO	crt-1	fmo-4 KO	17	12	0	0
crt-1 fmo-4 KO	crt-1	fmo-4 KO	19	15	0	0
crt-1 fmo-4 KO	crt-1	fmo-4 KO	21	22	0	0
crt-1 fmo-4 KO	crt-1	fmo-4 KO	24	14	0	0
crt-1 fmo-4 KO	crt-1	fmo-4 KO	26	10	0	0
crt-1 fmo-4 KO	crt-1	fmo-4 KO	28	10	0	0
crt-1 fmo-4 KO	crt-1	fmo-4 KO	31	6	0	0
crt-1 fmo-4 KO	crt-1	fmo-4 KO	33	5	0	0
crt-1 fmo-4 KO	crt-1	fmo-4 KO	35	0	0	0
crt-1 fmo-4 KO	crt-1	fmo-4 KO	38	0	0	0
crt-1 fmo-4 KO	crt-1	fmo-4 KO	40	0	0	0
