# Supplementary material for: fmo-4 promotes longevity and stress resistance via ER to mitochondria calcium regulation in C. elegans
Source: eLife journal article supplement (doi:10.7554/elife.99971), 2024-08-27
Supplement: data3 [file cox regression EV CRT1 rep 4.xlsx]

## Sheet: data
condition	RNAi	genotype	day	dead normal	dead rupture	censored
EV WT	EV	WT	10	2	0	0
EV WT	EV	WT	13	7	0	0
EV WT	EV	WT	15	10	0	0
EV WT	EV	WT	17	13	0	0
EV WT	EV	WT	20	18	0	0
EV WT	EV	WT	22	21	0	0
EV WT	EV	WT	24	19	0	0
EV WT	EV	WT	27	15	0	0
EV WT	EV	WT	29	11	0	0
EV WT	EV	WT	31	2	0	0
EV WT	EV	WT	34	0	0	0
EV WT	EV	WT	36	0	0	0
EV WT	EV	WT	38	0	0	0
EV WT	EV	WT	41	0	0	0
EV fmo-4 OE	EV	fmo-4 OE	10	0	0	0
EV fmo-4 OE	EV	fmo-4 OE	13	3	0	0
EV fmo-4 OE	EV	fmo-4 OE	15	5	0	0
EV fmo-4 OE	EV	fmo-4 OE	17	8	0	0
EV fmo-4 OE	EV	fmo-4 OE	20	11	0	0
EV fmo-4 OE	EV	fmo-4 OE	22	13	0	0
EV fmo-4 OE	EV	fmo-4 OE	24	17	0	0
EV fmo-4 OE	EV	fmo-4 OE	27	23	0	0
EV fmo-4 OE	EV	fmo-4 OE	29	16	0	0
EV fmo-4 OE	EV	fmo-4 OE	31	10	0	0
EV fmo-4 OE	EV	fmo-4 OE	34	6	0	0
EV fmo-4 OE	EV	fmo-4 OE	36	5	0	0
EV fmo-4 OE	EV	fmo-4 OE	38	3	0	0
EV fmo-4 OE	EV	fmo-4 OE	41	0	0	0
EV fmo-4 KO	EV	fmo-4 KO	10	1	0	0
EV fmo-4 KO	EV	fmo-4 KO	13	6	0	0
EV fmo-4 KO	EV	fmo-4 KO	15	13	0	0
EV fmo-4 KO	EV	fmo-4 KO	17	16	0	0
EV fmo-4 KO	EV	fmo-4 KO	20	25	0	0
EV fmo-4 KO	EV	fmo-4 KO	22	23	0	0
EV fmo-4 KO	EV	fmo-4 KO	24	18	0	0
EV fmo-4 KO	EV	fmo-4 KO	27	11	0	0
EV fmo-4 KO	EV	fmo-4 KO	29	3	0	0
EV fmo-4 KO	EV	fmo-4 KO	31	3	0	0
EV fmo-4 KO	EV	fmo-4 KO	34	0	0	0
EV fmo-4 KO	EV	fmo-4 KO	36	0	0	0
EV fmo-4 KO	EV	fmo-4 KO	38	0	0	0
EV fmo-4 KO	EV	fmo-4 KO	41	0	0	0
crt-1 WT	crt-1	WT	10	0	0	0
crt-1 WT	crt-1	WT	13	2	0	0
crt-1 WT	crt-1	WT	15	7	0	0
crt-1 WT	crt-1	WT	17	5	0	0
crt-1 WT	crt-1	WT	20	10	0	0
crt-1 WT	crt-1	WT	22	17	0	0
crt-1 WT	crt-1	WT	24	19	0	0
crt-1 WT	crt-1	WT	27	27	0	0
crt-1 WT	crt-1	WT	29	18	0	0
crt-1 WT	crt-1	WT	31	6	0	0
crt-1 WT	crt-1	WT	34	4	0	0
crt-1 WT	crt-1	WT	36	3	0	0
crt-1 WT	crt-1	WT	38	1	0	0
crt-1 WT	crt-1	WT	41	1	0	0
crt-1 fmo-4 OE	crt-1	fmo-4 OE	10	0	0	0
crt-1 fmo-4 OE	crt-1	fmo-4 OE	13	2	0	0
crt-1 fmo-4 OE	crt-1	fmo-4 OE	15	2	0	0
crt-1 fmo-4 OE	crt-1	fmo-4 OE	17	11	0	0
crt-1 fmo-4 OE	crt-1	fmo-4 OE	20	15	0	0
crt-1 fmo-4 OE	crt-1	fmo-4 OE	22	18	0	0
crt-1 fmo-4 OE	crt-1	fmo-4 OE	24	25	0	0
crt-1 fmo-4 OE	crt-1	fmo-4 OE	27	20	0	0
crt-1 fmo-4 OE	crt-1	fmo-4 OE	29	16	0	0
crt-1 fmo-4 OE	crt-1	fmo-4 OE	31	5	0	0
crt-1 fmo-4 OE	crt-1	fmo-4 OE	34	3	0	0
crt-1 fmo-4 OE	crt-1	fmo-4 OE	36	2	0	0
crt-1 fmo-4 OE	crt-1	fmo-4 OE	38	1	0	0
crt-1 fmo-4 OE	crt-1	fmo-4 OE	41	0	0	0
crt-1 fmo-4 KO	crt-1	fmo-4 KO	10	0	0	0
crt-1 fmo-4 KO	crt-1	fmo-4 KO	13	3	0	0
crt-1 fmo-4 KO	crt-1	fmo-4 KO	15	4	0	0
crt-1 fmo-4 KO	crt-1	fmo-4 KO	17	8	0	0
crt-1 fmo-4 KO	crt-1	fmo-4 KO	20	15	0	0
crt-1 fmo-4 KO	crt-1	fmo-4 KO	22	17	0	0
crt-1 fmo-4 KO	crt-1	fmo-4 KO	24	21	0	0
crt-1 fmo-4 KO	crt-1	fmo-4 KO	27	17	0	0
crt-1 fmo-4 KO	crt-1	fmo-4 KO	29	13	0	0
crt-1 fmo-4 KO	crt-1	fmo-4 KO	31	7	0	0
crt-1 fmo-4 KO	crt-1	fmo-4 KO	34	4	0	0
crt-1 fmo-4 KO	crt-1	fmo-4 KO	36	3	0	0
crt-1 fmo-4 KO	crt-1	fmo-4 KO	38	1	0	0
crt-1 fmo-4 KO	crt-1	fmo-4 KO	41	2	0	0
