# Supplementary material for: fmo-4 promotes longevity and stress resistance via ER to mitochondria calcium regulation in C. elegans
Source: eLife journal article supplement (doi:10.7554/elife.99971), 2024-08-27
Supplement: data3 [file cox regression EV CYC1 rep 2.xlsx]

## Sheet: data
condition	RNAi	genotype	day	dead normal	dead rupture	censored
EV WT	EV	WT	10	0	0	0
EV WT	EV	WT	14	3	0	0
EV WT	EV	WT	16	5	0	0
EV WT	EV	WT	18	18	0	0
EV WT	EV	WT	21	24	0	0
EV WT	EV	WT	23	26	0	0
EV WT	EV	WT	25	18	0	0
EV WT	EV	WT	28	14	0	0
EV WT	EV	WT	30	9	0	0
EV WT	EV	WT	32	4	0	0
EV WT	EV	WT	35	0	0	0
EV WT	EV	WT	37	0	0	0
EV WT	EV	WT	39	0	0	0
EV WT	EV	WT	42	0	0	0
EV fmo-4 OE	EV	fmo-4 OE	10	0	0	0
EV fmo-4 OE	EV	fmo-4 OE	14	1	0	0
EV fmo-4 OE	EV	fmo-4 OE	16	5	0	0
EV fmo-4 OE	EV	fmo-4 OE	18	6	0	0
EV fmo-4 OE	EV	fmo-4 OE	21	10	0	0
EV fmo-4 OE	EV	fmo-4 OE	23	18	0	0
EV fmo-4 OE	EV	fmo-4 OE	25	23	0	0
EV fmo-4 OE	EV	fmo-4 OE	28	20	0	0
EV fmo-4 OE	EV	fmo-4 OE	30	10	0	0
EV fmo-4 OE	EV	fmo-4 OE	32	12	0	0
EV fmo-4 OE	EV	fmo-4 OE	35	6	0	0
EV fmo-4 OE	EV	fmo-4 OE	37	3	0	0
EV fmo-4 OE	EV	fmo-4 OE	39	3	0	0
EV fmo-4 OE	EV	fmo-4 OE	42	2	0	0
EV fmo-4 KO	EV	fmo-4 KO	10	0	0	0
EV fmo-4 KO	EV	fmo-4 KO	14	4	0	0
EV fmo-4 KO	EV	fmo-4 KO	16	9	0	0
EV fmo-4 KO	EV	fmo-4 KO	18	16	0	0
EV fmo-4 KO	EV	fmo-4 KO	21	20	0	0
EV fmo-4 KO	EV	fmo-4 KO	23	28	0	0
EV fmo-4 KO	EV	fmo-4 KO	25	17	0	0
EV fmo-4 KO	EV	fmo-4 KO	28	14	0	0
EV fmo-4 KO	EV	fmo-4 KO	30	8	0	0
EV fmo-4 KO	EV	fmo-4 KO	32	4	0	0
EV fmo-4 KO	EV	fmo-4 KO	35	0	0	0
EV fmo-4 KO	EV	fmo-4 KO	37	0	0	0
EV fmo-4 KO	EV	fmo-4 KO	39	0	0	0
EV fmo-4 KO	EV	fmo-4 KO	42	0	0	0
cyc-1 WT	cyc-1	WT	10	0	0	0
cyc-1 WT	cyc-1	WT	14	1	0	0
cyc-1 WT	cyc-1	WT	16	2	0	0
cyc-1 WT	cyc-1	WT	18	2	0	0
cyc-1 WT	cyc-1	WT	21	4	0	0
cyc-1 WT	cyc-1	WT	23	15	0	0
cyc-1 WT	cyc-1	WT	25	17	0	0
cyc-1 WT	cyc-1	WT	28	17	0	0
cyc-1 WT	cyc-1	WT	30	21	0	0
cyc-1 WT	cyc-1	WT	32	15	0	0
cyc-1 WT	cyc-1	WT	35	12	0	0
cyc-1 WT	cyc-1	WT	37	8	0	0
cyc-1 WT	cyc-1	WT	39	4	0	0
cyc-1 WT	cyc-1	WT	42	2	0	0
cyc-1 fmo-4 OE	cyc-1	fmo-4 OE	10	0	0	0
cyc-1 fmo-4 OE	cyc-1	fmo-4 OE	14	0	0	0
cyc-1 fmo-4 OE	cyc-1	fmo-4 OE	16	3	0	0
cyc-1 fmo-4 OE	cyc-1	fmo-4 OE	18	1	0	0
cyc-1 fmo-4 OE	cyc-1	fmo-4 OE	21	3	0	0
cyc-1 fmo-4 OE	cyc-1	fmo-4 OE	23	12	0	0
cyc-1 fmo-4 OE	cyc-1	fmo-4 OE	25	20	0	0
cyc-1 fmo-4 OE	cyc-1	fmo-4 OE	28	16	0	0
cyc-1 fmo-4 OE	cyc-1	fmo-4 OE	30	12	0	0
cyc-1 fmo-4 OE	cyc-1	fmo-4 OE	32	22	0	0
cyc-1 fmo-4 OE	cyc-1	fmo-4 OE	35	14	0	0
cyc-1 fmo-4 OE	cyc-1	fmo-4 OE	37	5	0	0
cyc-1 fmo-4 OE	cyc-1	fmo-4 OE	39	6	0	0
cyc-1 fmo-4 OE	cyc-1	fmo-4 OE	42	4	0	0
cyc-1 fmo-4 KO	cyc-1	fmo-4 KO	10	0	0	0
cyc-1 fmo-4 KO	cyc-1	fmo-4 KO	14	0	0	0
cyc-1 fmo-4 KO	cyc-1	fmo-4 KO	16	2	0	0
cyc-1 fmo-4 KO	cyc-1	fmo-4 KO	18	2	0	0
cyc-1 fmo-4 KO	cyc-1	fmo-4 KO	21	6	0	0
cyc-1 fmo-4 KO	cyc-1	fmo-4 KO	23	13	0	0
cyc-1 fmo-4 KO	cyc-1	fmo-4 KO	25	16	0	0
cyc-1 fmo-4 KO	cyc-1	fmo-4 KO	28	21	0	0
cyc-1 fmo-4 KO	cyc-1	fmo-4 KO	30	15	0	0
cyc-1 fmo-4 KO	cyc-1	fmo-4 KO	32	14	0	0
cyc-1 fmo-4 KO	cyc-1	fmo-4 KO	35	6	0	0
cyc-1 fmo-4 KO	cyc-1	fmo-4 KO	37	11	0	0
cyc-1 fmo-4 KO	cyc-1	fmo-4 KO	39	10	0	0
cyc-1 fmo-4 KO	cyc-1	fmo-4 KO	42	3	0	0
