# Supplementary material for: fmo-4 promotes longevity and stress resistance via ER to mitochondria calcium regulation in C. elegans
Source: eLife journal article supplement (doi:10.7554/elife.99971), 2024-08-27
Supplement: data3 [file cox regression EV DAF2 rep 1.xlsx]

## Sheet: data
condition	RNAi	genotype	day	dead normal	dead rupture	censored
EV WT	EV	WT	10	0	0	0
EV WT	EV	WT	13	5	0	0
EV WT	EV	WT	15	1	0	0
EV WT	EV	WT	17	4	0	0
EV WT	EV	WT	20	11	0	0
EV WT	EV	WT	22	16	0	0
EV WT	EV	WT	24	20	0	0
EV WT	EV	WT	27	35	0	0
EV WT	EV	WT	29	17	0	0
EV WT	EV	WT	31	9	0	0
EV WT	EV	WT	34	1	0	0
EV WT	EV	WT	36	0	0	0
EV WT	EV	WT	38	0	0	0
EV WT	EV	WT	41	0	0	0
EV WT	EV	WT	43	0	0	0
EV WT	EV	WT	45	0	0	0
EV fmo-4 OE	EV	fmo-4 OE	10	0	0	0
EV fmo-4 OE	EV	fmo-4 OE	13	7	0	0
EV fmo-4 OE	EV	fmo-4 OE	15	3	0	0
EV fmo-4 OE	EV	fmo-4 OE	17	6	0	0
EV fmo-4 OE	EV	fmo-4 OE	20	6	0	0
EV fmo-4 OE	EV	fmo-4 OE	22	4	0	0
EV fmo-4 OE	EV	fmo-4 OE	24	10	0	0
EV fmo-4 OE	EV	fmo-4 OE	27	15	0	0
EV fmo-4 OE	EV	fmo-4 OE	29	24	0	0
EV fmo-4 OE	EV	fmo-4 OE	31	19	0	0
EV fmo-4 OE	EV	fmo-4 OE	34	16	0	0
EV fmo-4 OE	EV	fmo-4 OE	36	1	0	0
EV fmo-4 OE	EV	fmo-4 OE	38	2	0	0
EV fmo-4 OE	EV	fmo-4 OE	41	0	0	0
EV fmo-4 OE	EV	fmo-4 OE	43	0	0	0
EV fmo-4 OE	EV	fmo-4 OE	45	0	0	0
EV fmo-4 KO	EV	fmo-4 KO	10	0	0	0
EV fmo-4 KO	EV	fmo-4 KO	13	6	0	0
EV fmo-4 KO	EV	fmo-4 KO	15	5	0	0
EV fmo-4 KO	EV	fmo-4 KO	17	5	0	0
EV fmo-4 KO	EV	fmo-4 KO	20	4	0	0
EV fmo-4 KO	EV	fmo-4 KO	22	8	0	0
EV fmo-4 KO	EV	fmo-4 KO	24	19	0	0
EV fmo-4 KO	EV	fmo-4 KO	27	20	0	0
EV fmo-4 KO	EV	fmo-4 KO	29	16	0	0
EV fmo-4 KO	EV	fmo-4 KO	31	4	0	0
EV fmo-4 KO	EV	fmo-4 KO	34	0	0	0
EV fmo-4 KO	EV	fmo-4 KO	36	0	0	0
EV fmo-4 KO	EV	fmo-4 KO	38	0	0	0
EV fmo-4 KO	EV	fmo-4 KO	41	0	0	0
EV fmo-4 KO	EV	fmo-4 KO	43	0	0	0
EV fmo-4 KO	EV	fmo-4 KO	45	0	0	0
daf-2 WT	daf-2	WT	10	2	0	0
daf-2 WT	daf-2	WT	13	0	0	0
daf-2 WT	daf-2	WT	15	0	0	0
daf-2 WT	daf-2	WT	17	1	0	0
daf-2 WT	daf-2	WT	20	2	0	0
daf-2 WT	daf-2	WT	22	5	0	0
daf-2 WT	daf-2	WT	24	4	0	0
daf-2 WT	daf-2	WT	27	11	0	0
daf-2 WT	daf-2	WT	29	10	0	0
daf-2 WT	daf-2	WT	31	26	0	0
daf-2 WT	daf-2	WT	34	21	0	0
daf-2 WT	daf-2	WT	36	15	0	0
daf-2 WT	daf-2	WT	38	7	0	0
daf-2 WT	daf-2	WT	41	5	0	0
daf-2 WT	daf-2	WT	43	0	0	0
daf-2 WT	daf-2	WT	45	0	0	0
daf-2 fmo-4 OE	daf-2	fmo-4 OE	10	0	0	0
daf-2 fmo-4 OE	daf-2	fmo-4 OE	13	0	0	0
daf-2 fmo-4 OE	daf-2	fmo-4 OE	15	0	0	0
daf-2 fmo-4 OE	daf-2	fmo-4 OE	17	0	0	0
daf-2 fmo-4 OE	daf-2	fmo-4 OE	20	1	0	0
daf-2 fmo-4 OE	daf-2	fmo-4 OE	22	2	0	0
daf-2 fmo-4 OE	daf-2	fmo-4 OE	24	2	0	0
daf-2 fmo-4 OE	daf-2	fmo-4 OE	27	3	0	0
daf-2 fmo-4 OE	daf-2	fmo-4 OE	29	9	0	0
daf-2 fmo-4 OE	daf-2	fmo-4 OE	31	10	0	0
daf-2 fmo-4 OE	daf-2	fmo-4 OE	34	30	0	0
daf-2 fmo-4 OE	daf-2	fmo-4 OE	36	18	0	0
daf-2 fmo-4 OE	daf-2	fmo-4 OE	38	10	0	0
daf-2 fmo-4 OE	daf-2	fmo-4 OE	41	21	0	0
daf-2 fmo-4 OE	daf-2	fmo-4 OE	43	9	0	0
daf-2 fmo-4 OE	daf-2	fmo-4 OE	45	1	0	0
daf-2 fmo-4 KO	daf-2	fmo-4 KO	10	0	0	0
daf-2 fmo-4 KO	daf-2	fmo-4 KO	13	6	0	0
daf-2 fmo-4 KO	daf-2	fmo-4 KO	15	2	0	0
daf-2 fmo-4 KO	daf-2	fmo-4 KO	17	7	0	0
daf-2 fmo-4 KO	daf-2	fmo-4 KO	20	12	0	0
daf-2 fmo-4 KO	daf-2	fmo-4 KO	22	9	0	0
daf-2 fmo-4 KO	daf-2	fmo-4 KO	24	8	0	0
daf-2 fmo-4 KO	daf-2	fmo-4 KO	27	7	0	0
daf-2 fmo-4 KO	daf-2	fmo-4 KO	29	13	0	0
daf-2 fmo-4 KO	daf-2	fmo-4 KO	31	12	0	0
daf-2 fmo-4 KO	daf-2	fmo-4 KO	34	16	0	0
daf-2 fmo-4 KO	daf-2	fmo-4 KO	36	9	0	0
daf-2 fmo-4 KO	daf-2	fmo-4 KO	38	6	0	0
daf-2 fmo-4 KO	daf-2	fmo-4 KO	41	8	0	0
daf-2 fmo-4 KO	daf-2	fmo-4 KO	43	5	0	0
daf-2 fmo-4 KO	daf-2	fmo-4 KO	45	1	0	0
