# Supplementary material for: fmo-4 promotes longevity and stress resistance via ER to mitochondria calcium regulation in C. elegans
Source: eLife journal article supplement (doi:10.7554/elife.99971), 2024-08-27
Supplement: data3 [file cox regression EV DAF2 rep 2.xlsx]

## Sheet: data
condition	RNAi	genotype	day	dead normal	dead rupture	censored
EV WT	EV	WT	10	0	0	0
EV WT	EV	WT	14	8	0	0
EV WT	EV	WT	16	8	0	0
EV WT	EV	WT	18	13	0	0
EV WT	EV	WT	21	14	0	0
EV WT	EV	WT	23	43	0	0
EV WT	EV	WT	25	15	0	0
EV WT	EV	WT	28	9	0	0
EV WT	EV	WT	30	7	0	0
EV WT	EV	WT	32	0	0	0
EV WT	EV	WT	35	0	0	0
EV WT	EV	WT	37	0	0	0
EV WT	EV	WT	39	0	0	0
EV WT	EV	WT	42	0	0	0
EV fmo-4 OE	EV	fmo-4 OE	10	0	0	0
EV fmo-4 OE	EV	fmo-4 OE	14	2	0	0
EV fmo-4 OE	EV	fmo-4 OE	16	6	0	0
EV fmo-4 OE	EV	fmo-4 OE	18	5	0	0
EV fmo-4 OE	EV	fmo-4 OE	21	8	0	0
EV fmo-4 OE	EV	fmo-4 OE	23	23	0	0
EV fmo-4 OE	EV	fmo-4 OE	25	23	0	0
EV fmo-4 OE	EV	fmo-4 OE	28	21	0	0
EV fmo-4 OE	EV	fmo-4 OE	30	11	0	0
EV fmo-4 OE	EV	fmo-4 OE	32	8	0	0
EV fmo-4 OE	EV	fmo-4 OE	35	5	0	0
EV fmo-4 OE	EV	fmo-4 OE	37	1	0	0
EV fmo-4 OE	EV	fmo-4 OE	39	0	0	0
EV fmo-4 OE	EV	fmo-4 OE	42	0	0	0
EV fmo-4 KO	EV	fmo-4 KO	10	0	0	0
EV fmo-4 KO	EV	fmo-4 KO	14	6	0	0
EV fmo-4 KO	EV	fmo-4 KO	16	8	0	0
EV fmo-4 KO	EV	fmo-4 KO	18	11	0	0
EV fmo-4 KO	EV	fmo-4 KO	21	17	0	0
EV fmo-4 KO	EV	fmo-4 KO	23	37	0	0
EV fmo-4 KO	EV	fmo-4 KO	25	7	0	0
EV fmo-4 KO	EV	fmo-4 KO	28	11	0	0
EV fmo-4 KO	EV	fmo-4 KO	30	6	0	0
EV fmo-4 KO	EV	fmo-4 KO	32	1	0	0
EV fmo-4 KO	EV	fmo-4 KO	35	0	0	0
EV fmo-4 KO	EV	fmo-4 KO	37	0	0	0
EV fmo-4 KO	EV	fmo-4 KO	39	0	0	0
EV fmo-4 KO	EV	fmo-4 KO	42	0	0	0
daf-2 WT	daf-2	WT	10	0	0	0
daf-2 WT	daf-2	WT	14	2	0	0
daf-2 WT	daf-2	WT	16	0	0	0
daf-2 WT	daf-2	WT	18	3	0	0
daf-2 WT	daf-2	WT	21	1	0	0
daf-2 WT	daf-2	WT	23	13	0	0
daf-2 WT	daf-2	WT	25	12	0	0
daf-2 WT	daf-2	WT	28	14	0	0
daf-2 WT	daf-2	WT	30	24	0	0
daf-2 WT	daf-2	WT	32	22	0	0
daf-2 WT	daf-2	WT	35	17	0	0
daf-2 WT	daf-2	WT	37	8	0	0
daf-2 WT	daf-2	WT	39	3	0	0
daf-2 WT	daf-2	WT	42	2	0	0
daf-2 fmo-4 OE	daf-2	fmo-4 OE	10	0	0	0
daf-2 fmo-4 OE	daf-2	fmo-4 OE	14	3	0	0
daf-2 fmo-4 OE	daf-2	fmo-4 OE	16	3	0	0
daf-2 fmo-4 OE	daf-2	fmo-4 OE	18	3	0	0
daf-2 fmo-4 OE	daf-2	fmo-4 OE	21	3	0	0
daf-2 fmo-4 OE	daf-2	fmo-4 OE	23	14	0	0
daf-2 fmo-4 OE	daf-2	fmo-4 OE	25	12	0	0
daf-2 fmo-4 OE	daf-2	fmo-4 OE	28	15	0	0
daf-2 fmo-4 OE	daf-2	fmo-4 OE	30	23	0	0
daf-2 fmo-4 OE	daf-2	fmo-4 OE	32	12	0	0
daf-2 fmo-4 OE	daf-2	fmo-4 OE	35	10	0	0
daf-2 fmo-4 OE	daf-2	fmo-4 OE	37	6	0	0
daf-2 fmo-4 OE	daf-2	fmo-4 OE	39	2	0	0
daf-2 fmo-4 OE	daf-2	fmo-4 OE	42	1	0	0
daf-2 fmo-4 KO	daf-2	fmo-4 KO	10	0	0	0
daf-2 fmo-4 KO	daf-2	fmo-4 KO	14	2	0	0
daf-2 fmo-4 KO	daf-2	fmo-4 KO	16	2	0	0
daf-2 fmo-4 KO	daf-2	fmo-4 KO	18	4	0	0
daf-2 fmo-4 KO	daf-2	fmo-4 KO	21	1	0	0
daf-2 fmo-4 KO	daf-2	fmo-4 KO	23	15	0	0
daf-2 fmo-4 KO	daf-2	fmo-4 KO	25	14	0	0
daf-2 fmo-4 KO	daf-2	fmo-4 KO	28	12	0	0
daf-2 fmo-4 KO	daf-2	fmo-4 KO	30	24	0	0
daf-2 fmo-4 KO	daf-2	fmo-4 KO	32	18	0	0
daf-2 fmo-4 KO	daf-2	fmo-4 KO	35	14	0	0
daf-2 fmo-4 KO	daf-2	fmo-4 KO	37	10	0	0
daf-2 fmo-4 KO	daf-2	fmo-4 KO	39	6	0	0
daf-2 fmo-4 KO	daf-2	fmo-4 KO	42	4	0	0
