# Supplementary material for: fmo-4 promotes longevity and stress resistance via ER to mitochondria calcium regulation in C. elegans
Source: eLife journal article supplement (doi:10.7554/elife.99971), 2024-08-27
Supplement: data3 [file cox regression EV ITR1 rep 3.xlsx]

## Sheet: data
condition	RNAi	genotype	day	dead normal	dead rupture	censored
EV WT	EV	WT	10	0	0	0
EV WT	EV	WT	12	2	0	0
EV WT	EV	WT	14	5	0	0
EV WT	EV	WT	17	10	0	0
EV WT	EV	WT	19	10	0	0
EV WT	EV	WT	21	23	0	0
EV WT	EV	WT	24	27	0	0
EV WT	EV	WT	26	24	0	0
EV WT	EV	WT	28	13	0	0
EV WT	EV	WT	31	4	0	0
EV WT	EV	WT	33	0	0	0
EV WT	EV	WT	35	0	0	0
EV WT	EV	WT	38	0	0	0
EV WT	EV	WT	40	0	0	0
EV fmo-4 OE	EV	fmo-4 OE	10	0	0	0
EV fmo-4 OE	EV	fmo-4 OE	12	0	0	0
EV fmo-4 OE	EV	fmo-4 OE	14	2	0	0
EV fmo-4 OE	EV	fmo-4 OE	17	2	0	0
EV fmo-4 OE	EV	fmo-4 OE	19	4	0	0
EV fmo-4 OE	EV	fmo-4 OE	21	11	0	0
EV fmo-4 OE	EV	fmo-4 OE	24	15	0	0
EV fmo-4 OE	EV	fmo-4 OE	26	22	0	0
EV fmo-4 OE	EV	fmo-4 OE	28	18	0	0
EV fmo-4 OE	EV	fmo-4 OE	31	12	0	0
EV fmo-4 OE	EV	fmo-4 OE	33	12	0	0
EV fmo-4 OE	EV	fmo-4 OE	35	8	0	0
EV fmo-4 OE	EV	fmo-4 OE	38	6	0	0
EV fmo-4 OE	EV	fmo-4 OE	40	4	0	0
EV fmo-4 KO	EV	fmo-4 KO	10	0	0	0
EV fmo-4 KO	EV	fmo-4 KO	12	4	0	0
EV fmo-4 KO	EV	fmo-4 KO	14	4	0	0
EV fmo-4 KO	EV	fmo-4 KO	17	12	0	0
EV fmo-4 KO	EV	fmo-4 KO	19	25	0	0
EV fmo-4 KO	EV	fmo-4 KO	21	27	0	0
EV fmo-4 KO	EV	fmo-4 KO	24	23	0	0
EV fmo-4 KO	EV	fmo-4 KO	26	16	0	0
EV fmo-4 KO	EV	fmo-4 KO	28	5	0	0
EV fmo-4 KO	EV	fmo-4 KO	31	4	0	0
EV fmo-4 KO	EV	fmo-4 KO	33	0	0	0
EV fmo-4 KO	EV	fmo-4 KO	35	0	0	0
EV fmo-4 KO	EV	fmo-4 KO	38	0	0	0
EV fmo-4 KO	EV	fmo-4 KO	40	0	0	0
itr-1 WT	itr-1	WT	10	0	0	0
itr-1 WT	itr-1	WT	12	4	0	0
itr-1 WT	itr-1	WT	14	12	0	0
itr-1 WT	itr-1	WT	17	22	0	0
itr-1 WT	itr-1	WT	19	35	0	0
itr-1 WT	itr-1	WT	21	32	0	0
itr-1 WT	itr-1	WT	24	8	0	0
itr-1 WT	itr-1	WT	26	7	0	0
itr-1 WT	itr-1	WT	28	0	0	0
itr-1 WT	itr-1	WT	31	0	0	0
itr-1 WT	itr-1	WT	33	0	0	0
itr-1 WT	itr-1	WT	35	0	0	0
itr-1 WT	itr-1	WT	38	0	0	0
itr-1 WT	itr-1	WT	40	0	0	0
itr-1 fmo-4 OE	itr-1	fmo-4 OE	10	0	0	0
itr-1 fmo-4 OE	itr-1	fmo-4 OE	12	3	0	0
itr-1 fmo-4 OE	itr-1	fmo-4 OE	14	8	0	0
itr-1 fmo-4 OE	itr-1	fmo-4 OE	17	16	0	0
itr-1 fmo-4 OE	itr-1	fmo-4 OE	19	28	0	0
itr-1 fmo-4 OE	itr-1	fmo-4 OE	21	31	0	0
itr-1 fmo-4 OE	itr-1	fmo-4 OE	24	22	0	0
itr-1 fmo-4 OE	itr-1	fmo-4 OE	26	6	0	0
itr-1 fmo-4 OE	itr-1	fmo-4 OE	28	3	0	0
itr-1 fmo-4 OE	itr-1	fmo-4 OE	31	0	0	0
itr-1 fmo-4 OE	itr-1	fmo-4 OE	33	0	0	0
itr-1 fmo-4 OE	itr-1	fmo-4 OE	35	0	0	0
itr-1 fmo-4 OE	itr-1	fmo-4 OE	38	0	0	0
itr-1 fmo-4 OE	itr-1	fmo-4 OE	40	0	0	0
itr-1 fmo-4 KO	itr-1	fmo-4 KO	10	0	0	0
itr-1 fmo-4 KO	itr-1	fmo-4 KO	12	6	0	0
itr-1 fmo-4 KO	itr-1	fmo-4 KO	14	10	0	0
itr-1 fmo-4 KO	itr-1	fmo-4 KO	17	21	0	0
itr-1 fmo-4 KO	itr-1	fmo-4 KO	19	28	0	0
itr-1 fmo-4 KO	itr-1	fmo-4 KO	21	26	0	0
itr-1 fmo-4 KO	itr-1	fmo-4 KO	24	18	0	0
itr-1 fmo-4 KO	itr-1	fmo-4 KO	26	6	0	0
itr-1 fmo-4 KO	itr-1	fmo-4 KO	28	0	0	0
itr-1 fmo-4 KO	itr-1	fmo-4 KO	31	0	0	0
itr-1 fmo-4 KO	itr-1	fmo-4 KO	33	0	0	0
itr-1 fmo-4 KO	itr-1	fmo-4 KO	35	0	0	0
itr-1 fmo-4 KO	itr-1	fmo-4 KO	38	0	0	0
itr-1 fmo-4 KO	itr-1	fmo-4 KO	40	0	0	0
