# Supplementary material for: fmo-4 promotes longevity and stress resistance via ER to mitochondria calcium regulation in C. elegans
Source: eLife journal article supplement (doi:10.7554/elife.99971), 2024-08-27
Supplement: data3 [file cox regression EV RSKS1 rep 1.xlsx]

## Sheet: data
condition	RNAi	genotype	day	dead normal	dead rupture	censored
EV WT	EV	WT	10	0	0	0
EV WT	EV	WT	12	5	0	0
EV WT	EV	WT	14	5	0	0
EV WT	EV	WT	17	7	0	0
EV WT	EV	WT	19	14	0	0
EV WT	EV	WT	21	10	0	0
EV WT	EV	WT	24	40	0	0
EV WT	EV	WT	26	20	0	0
EV WT	EV	WT	28	8	0	0
EV WT	EV	WT	31	8	0	0
EV WT	EV	WT	33	0	0	0
EV WT	EV	WT	35	0	0	0
EV WT	EV	WT	38	0	0	0
EV WT	EV	WT	40	0	0	0
EV fmo-4 OE	EV	fmo-4 OE	10	0	0	0
EV fmo-4 OE	EV	fmo-4 OE	12	0	0	0
EV fmo-4 OE	EV	fmo-4 OE	14	3	0	0
EV fmo-4 OE	EV	fmo-4 OE	17	3	0	0
EV fmo-4 OE	EV	fmo-4 OE	19	9	0	0
EV fmo-4 OE	EV	fmo-4 OE	21	11	0	0
EV fmo-4 OE	EV	fmo-4 OE	24	25	0	0
EV fmo-4 OE	EV	fmo-4 OE	26	25	0	0
EV fmo-4 OE	EV	fmo-4 OE	28	9	0	0
EV fmo-4 OE	EV	fmo-4 OE	31	8	0	0
EV fmo-4 OE	EV	fmo-4 OE	33	6	0	0
EV fmo-4 OE	EV	fmo-4 OE	35	5	0	0
EV fmo-4 OE	EV	fmo-4 OE	38	1	0	0
EV fmo-4 OE	EV	fmo-4 OE	40	0	0	0
EV fmo-4 KO	EV	fmo-4 KO	10	0	0	0
EV fmo-4 KO	EV	fmo-4 KO	12	6	0	0
EV fmo-4 KO	EV	fmo-4 KO	14	7	0	0
EV fmo-4 KO	EV	fmo-4 KO	17	9	0	0
EV fmo-4 KO	EV	fmo-4 KO	19	19	0	0
EV fmo-4 KO	EV	fmo-4 KO	21	27	0	0
EV fmo-4 KO	EV	fmo-4 KO	24	15	0	0
EV fmo-4 KO	EV	fmo-4 KO	26	5	0	0
EV fmo-4 KO	EV	fmo-4 KO	28	0	0	0
EV fmo-4 KO	EV	fmo-4 KO	31	0	0	0
EV fmo-4 KO	EV	fmo-4 KO	33	0	0	0
EV fmo-4 KO	EV	fmo-4 KO	35	0	0	0
EV fmo-4 KO	EV	fmo-4 KO	38	0	0	0
EV fmo-4 KO	EV	fmo-4 KO	40	0	0	0
rsks-1 WT	rsks-1	WT	10	0	0	0
rsks-1 WT	rsks-1	WT	12	0	0	0
rsks-1 WT	rsks-1	WT	14	2	0	0
rsks-1 WT	rsks-1	WT	17	3	0	0
rsks-1 WT	rsks-1	WT	19	7	0	0
rsks-1 WT	rsks-1	WT	21	5	0	0
rsks-1 WT	rsks-1	WT	24	19	0	0
rsks-1 WT	rsks-1	WT	26	23	0	0
rsks-1 WT	rsks-1	WT	28	13	0	0
rsks-1 WT	rsks-1	WT	31	6	0	0
rsks-1 WT	rsks-1	WT	33	4	0	0
rsks-1 WT	rsks-1	WT	35	4	0	0
rsks-1 WT	rsks-1	WT	38	1	0	0
rsks-1 WT	rsks-1	WT	40	0	0	0
rsks-1 fmo-4 OE	rsks-1	fmo-4 OE	10	0	0	0
rsks-1 fmo-4 OE	rsks-1	fmo-4 OE	12	0	0	0
rsks-1 fmo-4 OE	rsks-1	fmo-4 OE	14	1	0	0
rsks-1 fmo-4 OE	rsks-1	fmo-4 OE	17	2	0	0
rsks-1 fmo-4 OE	rsks-1	fmo-4 OE	19	8	0	0
rsks-1 fmo-4 OE	rsks-1	fmo-4 OE	21	10	0	0
rsks-1 fmo-4 OE	rsks-1	fmo-4 OE	24	10	0	0
rsks-1 fmo-4 OE	rsks-1	fmo-4 OE	26	6	0	0
rsks-1 fmo-4 OE	rsks-1	fmo-4 OE	28	6	0	0
rsks-1 fmo-4 OE	rsks-1	fmo-4 OE	31	6	0	0
rsks-1 fmo-4 OE	rsks-1	fmo-4 OE	33	4	0	0
rsks-1 fmo-4 OE	rsks-1	fmo-4 OE	35	2	0	0
rsks-1 fmo-4 OE	rsks-1	fmo-4 OE	38	1	0	0
rsks-1 fmo-4 OE	rsks-1	fmo-4 OE	40	0	0	0
rsks-1 fmo-4 KO	rsks-1	fmo-4 KO	10	0	0	0
rsks-1 fmo-4 KO	rsks-1	fmo-4 KO	12	5	0	0
rsks-1 fmo-4 KO	rsks-1	fmo-4 KO	14	8	0	0
rsks-1 fmo-4 KO	rsks-1	fmo-4 KO	17	12	0	0
rsks-1 fmo-4 KO	rsks-1	fmo-4 KO	19	23	0	0
rsks-1 fmo-4 KO	rsks-1	fmo-4 KO	21	28	0	0
rsks-1 fmo-4 KO	rsks-1	fmo-4 KO	24	17	0	0
rsks-1 fmo-4 KO	rsks-1	fmo-4 KO	26	2	0	0
rsks-1 fmo-4 KO	rsks-1	fmo-4 KO	28	0	0	0
rsks-1 fmo-4 KO	rsks-1	fmo-4 KO	31	0	0	0
rsks-1 fmo-4 KO	rsks-1	fmo-4 KO	33	0	0	0
rsks-1 fmo-4 KO	rsks-1	fmo-4 KO	35	0	0	0
rsks-1 fmo-4 KO	rsks-1	fmo-4 KO	38	0	0	0
rsks-1 fmo-4 KO	rsks-1	fmo-4 KO	40	0	0	0
