# Supplementary material for: fmo-4 promotes longevity and stress resistance via ER to mitochondria calcium regulation in C. elegans
Source: eLife journal article supplement (doi:10.7554/elife.99971), 2024-08-27
Supplement: data3 [file cox regression EV RSKS1 rep 3.xlsx]

## Sheet: data
condition	RNAi	genotype	day	dead normal	dead rupture	censored
EV WT	EV	WT	10	0	0	0
EV WT	EV	WT	12	1	0	0
EV WT	EV	WT	14	4	0	0
EV WT	EV	WT	17	8	0	0
EV WT	EV	WT	19	9	0	0
EV WT	EV	WT	21	21	0	0
EV WT	EV	WT	24	33	0	0
EV WT	EV	WT	26	27	0	0
EV WT	EV	WT	28	11	0	0
EV WT	EV	WT	31	1	0	0
EV WT	EV	WT	33	0	0	0
EV WT	EV	WT	35	0	0	0
EV WT	EV	WT	38	0	0	0
EV WT	EV	WT	40	0	0	0
EV fmo-4 OE	EV	fmo-4 OE	10	0	0	0
EV fmo-4 OE	EV	fmo-4 OE	12	0	0	0
EV fmo-4 OE	EV	fmo-4 OE	14	3	0	0
EV fmo-4 OE	EV	fmo-4 OE	17	0	0	0
EV fmo-4 OE	EV	fmo-4 OE	19	3	0	0
EV fmo-4 OE	EV	fmo-4 OE	21	2	0	0
EV fmo-4 OE	EV	fmo-4 OE	24	2	0	0
EV fmo-4 OE	EV	fmo-4 OE	26	3	0	0
EV fmo-4 OE	EV	fmo-4 OE	28	3	0	0
EV fmo-4 OE	EV	fmo-4 OE	31	5	0	0
EV fmo-4 OE	EV	fmo-4 OE	33	4	0	0
EV fmo-4 OE	EV	fmo-4 OE	35	3	0	0
EV fmo-4 OE	EV	fmo-4 OE	38	2	0	0
EV fmo-4 OE	EV	fmo-4 OE	40	0	0	0
EV fmo-4 KO	EV	fmo-4 KO	10	0	0	0
EV fmo-4 KO	EV	fmo-4 KO	12	3	0	0
EV fmo-4 KO	EV	fmo-4 KO	14	5	0	0
EV fmo-4 KO	EV	fmo-4 KO	17	4	0	0
EV fmo-4 KO	EV	fmo-4 KO	19	19	0	0
EV fmo-4 KO	EV	fmo-4 KO	21	25	0	0
EV fmo-4 KO	EV	fmo-4 KO	24	19	0	0
EV fmo-4 KO	EV	fmo-4 KO	26	13	0	0
EV fmo-4 KO	EV	fmo-4 KO	28	1	0	0
EV fmo-4 KO	EV	fmo-4 KO	31	0	0	0
EV fmo-4 KO	EV	fmo-4 KO	33	0	0	0
EV fmo-4 KO	EV	fmo-4 KO	35	0	0	0
EV fmo-4 KO	EV	fmo-4 KO	38	0	0	0
EV fmo-4 KO	EV	fmo-4 KO	40	0	0	0
rsks-1 WT	rsks-1	WT	10	0	0	0
rsks-1 WT	rsks-1	WT	12	0	0	0
rsks-1 WT	rsks-1	WT	14	1	0	0
rsks-1 WT	rsks-1	WT	17	3	0	0
rsks-1 WT	rsks-1	WT	19	2	0	0
rsks-1 WT	rsks-1	WT	21	2	0	0
rsks-1 WT	rsks-1	WT	24	8	0	0
rsks-1 WT	rsks-1	WT	26	7	0	0
rsks-1 WT	rsks-1	WT	28	11	0	0
rsks-1 WT	rsks-1	WT	31	24	0	0
rsks-1 WT	rsks-1	WT	33	44	0	0
rsks-1 WT	rsks-1	WT	35	9	0	0
rsks-1 WT	rsks-1	WT	38	8	0	0
rsks-1 WT	rsks-1	WT	40	0	0	0
rsks-1 fmo-4 OE	rsks-1	fmo-4 OE	10	0	0	0
rsks-1 fmo-4 OE	rsks-1	fmo-4 OE	12	1	0	0
rsks-1 fmo-4 OE	rsks-1	fmo-4 OE	14	1	0	0
rsks-1 fmo-4 OE	rsks-1	fmo-4 OE	17	4	0	0
rsks-1 fmo-4 OE	rsks-1	fmo-4 OE	19	4	0	0
rsks-1 fmo-4 OE	rsks-1	fmo-4 OE	21	5	0	0
rsks-1 fmo-4 OE	rsks-1	fmo-4 OE	24	6	0	0
rsks-1 fmo-4 OE	rsks-1	fmo-4 OE	26	7	0	0
rsks-1 fmo-4 OE	rsks-1	fmo-4 OE	28	6	0	0
rsks-1 fmo-4 OE	rsks-1	fmo-4 OE	31	10	0	0
rsks-1 fmo-4 OE	rsks-1	fmo-4 OE	33	19	0	0
rsks-1 fmo-4 OE	rsks-1	fmo-4 OE	35	3	0	0
rsks-1 fmo-4 OE	rsks-1	fmo-4 OE	38	4	0	0
rsks-1 fmo-4 OE	rsks-1	fmo-4 OE	40	0	0	0
rsks-1 fmo-4 KO	rsks-1	fmo-4 KO	10	0	0	0
rsks-1 fmo-4 KO	rsks-1	fmo-4 KO	12	2	0	0
rsks-1 fmo-4 KO	rsks-1	fmo-4 KO	14	3	0	0
rsks-1 fmo-4 KO	rsks-1	fmo-4 KO	17	10	0	0
rsks-1 fmo-4 KO	rsks-1	fmo-4 KO	19	11	0	0
rsks-1 fmo-4 KO	rsks-1	fmo-4 KO	21	15	0	0
rsks-1 fmo-4 KO	rsks-1	fmo-4 KO	24	43	0	0
rsks-1 fmo-4 KO	rsks-1	fmo-4 KO	26	19	0	0
rsks-1 fmo-4 KO	rsks-1	fmo-4 KO	28	7	0	0
rsks-1 fmo-4 KO	rsks-1	fmo-4 KO	31	3	0	0
rsks-1 fmo-4 KO	rsks-1	fmo-4 KO	33	0	0	0
rsks-1 fmo-4 KO	rsks-1	fmo-4 KO	35	0	0	0
rsks-1 fmo-4 KO	rsks-1	fmo-4 KO	38	0	0	0
rsks-1 fmo-4 KO	rsks-1	fmo-4 KO	40	0	0	0
