# Supplementary material for: fmo-4 promotes longevity and stress resistance via ER to mitochondria calcium regulation in C. elegans
Source: eLife journal article supplement (doi:10.7554/elife.99971), 2024-08-27
Supplement: data3 [file cox regression EV VDAC PQ assay rep 1.xlsx]

## Sheet: data
condition	RNAi	genotype	day	dead normal	dead rupture	censored
EV WT	EV	WT	0	0	0	0
EV WT	EV	WT	1	9	0	0
EV WT	EV	WT	4	26	0	0
EV WT	EV	WT	6	36	0	0
EV WT	EV	WT	8	1	0	0
EV WT	EV	WT	11	0	0	0
EV WT	EV	WT	13	0	0	0
EV WT	EV	WT	15	0	0	0
EV WT	EV	WT	18	0	0	0
EV WT	EV	WT	20	0	0	0
EV WT	EV	WT	22	0	0	0
EV fmo-4 OE	EV	fmo-4 OE	0	0	0	0
EV fmo-4 OE	EV	fmo-4 OE	1	1	0	0
EV fmo-4 OE	EV	fmo-4 OE	4	14	0	0
EV fmo-4 OE	EV	fmo-4 OE	6	18	0	0
EV fmo-4 OE	EV	fmo-4 OE	8	29	0	0
EV fmo-4 OE	EV	fmo-4 OE	11	14	0	0
EV fmo-4 OE	EV	fmo-4 OE	13	3	0	0
EV fmo-4 OE	EV	fmo-4 OE	15	1	0	0
EV fmo-4 OE	EV	fmo-4 OE	18	0	0	0
EV fmo-4 OE	EV	fmo-4 OE	20	0	0	0
EV fmo-4 OE	EV	fmo-4 OE	22	0	0	0
EV fmo-4 KO	EV	fmo-4 KO	0	0	0	0
EV fmo-4 KO	EV	fmo-4 KO	1	10	0	0
EV fmo-4 KO	EV	fmo-4 KO	4	27	0	0
EV fmo-4 KO	EV	fmo-4 KO	6	42	0	0
EV fmo-4 KO	EV	fmo-4 KO	8	0	0	0
EV fmo-4 KO	EV	fmo-4 KO	11	0	0	0
EV fmo-4 KO	EV	fmo-4 KO	13	0	0	0
EV fmo-4 KO	EV	fmo-4 KO	15	0	0	0
EV fmo-4 KO	EV	fmo-4 KO	18	0	0	0
EV fmo-4 KO	EV	fmo-4 KO	20	0	0	0
EV fmo-4 KO	EV	fmo-4 KO	22	0	0	0
vdac-1 WT	vdac-1	WT	0	0	0	0
vdac-1 WT	vdac-1	WT	1	10	0	0
vdac-1 WT	vdac-1	WT	4	31	0	0
vdac-1 WT	vdac-1	WT	6	29	0	0
vdac-1 WT	vdac-1	WT	8	0	0	0
vdac-1 WT	vdac-1	WT	11	0	0	0
vdac-1 WT	vdac-1	WT	13	0	0	0
vdac-1 WT	vdac-1	WT	15	0	0	0
vdac-1 WT	vdac-1	WT	18	0	0	0
vdac-1 WT	vdac-1	WT	20	0	0	0
vdac-1 WT	vdac-1	WT	22	0	0	0
vdac-1 fmo-4 OE	vdac-1	fmo-4 OE	0	0	0	0
vdac-1 fmo-4 OE	vdac-1	fmo-4 OE	1	8	0	0
vdac-1 fmo-4 OE	vdac-1	fmo-4 OE	4	28	0	0
vdac-1 fmo-4 OE	vdac-1	fmo-4 OE	6	30	0	0
vdac-1 fmo-4 OE	vdac-1	fmo-4 OE	8	0	0	0
vdac-1 fmo-4 OE	vdac-1	fmo-4 OE	11	0	0	0
vdac-1 fmo-4 OE	vdac-1	fmo-4 OE	13	0	0	0
vdac-1 fmo-4 OE	vdac-1	fmo-4 OE	15	0	0	0
vdac-1 fmo-4 OE	vdac-1	fmo-4 OE	18	0	0	0
vdac-1 fmo-4 OE	vdac-1	fmo-4 OE	20	0	0	0
vdac-1 fmo-4 OE	vdac-1	fmo-4 OE	22	0	0	0
vdac-1 fmo-4 KO	vdac-1	fmo-4 KO	0	0	0	0
vdac-1 fmo-4 KO	vdac-1	fmo-4 KO	1	11	0	0
vdac-1 fmo-4 KO	vdac-1	fmo-4 KO	4	39	0	0
vdac-1 fmo-4 KO	vdac-1	fmo-4 KO	6	45	0	0
vdac-1 fmo-4 KO	vdac-1	fmo-4 KO	8	0	0	0
vdac-1 fmo-4 KO	vdac-1	fmo-4 KO	11	0	0	0
vdac-1 fmo-4 KO	vdac-1	fmo-4 KO	13	0	0	0
vdac-1 fmo-4 KO	vdac-1	fmo-4 KO	15	0	0	0
vdac-1 fmo-4 KO	vdac-1	fmo-4 KO	18	0	0	0
vdac-1 fmo-4 KO	vdac-1	fmo-4 KO	20	0	0	0
vdac-1 fmo-4 KO	vdac-1	fmo-4 KO	22	0	0	0
