# Supplementary material for: fmo-4 promotes longevity and stress resistance via ER to mitochondria calcium regulation in C. elegans
Source: eLife journal article supplement (doi:10.7554/elife.99971), 2024-08-27
Supplement: data3 [file cox regression EV VDAC PQ assay rep 2.xlsx]

## Sheet: data
condition	RNAi	genotype	day	dead normal	dead rupture	censored
EV WT	EV	WT	0	0	0	0
EV WT	EV	WT	2	9	0	0
EV WT	EV	WT	5	24	0	0
EV WT	EV	WT	7	24	0	0
EV WT	EV	WT	9	9	0	0
EV WT	EV	WT	12	0	0	0
EV WT	EV	WT	14	0	0	0
EV WT	EV	WT	16	0	0	0
EV WT	EV	WT	19	0	0	0
EV WT	EV	WT	21	0	0	0
EV WT	EV	WT	23	0	0	0
EV fmo-4 OE	EV	fmo-4 OE	0	0	0	0
EV fmo-4 OE	EV	fmo-4 OE	2	0	0	0
EV fmo-4 OE	EV	fmo-4 OE	5	8	0	0
EV fmo-4 OE	EV	fmo-4 OE	7	20	0	0
EV fmo-4 OE	EV	fmo-4 OE	9	10	0	0
EV fmo-4 OE	EV	fmo-4 OE	12	7	0	0
EV fmo-4 OE	EV	fmo-4 OE	14	3	0	0
EV fmo-4 OE	EV	fmo-4 OE	16	0	0	0
EV fmo-4 OE	EV	fmo-4 OE	19	0	0	0
EV fmo-4 OE	EV	fmo-4 OE	21	0	0	0
EV fmo-4 OE	EV	fmo-4 OE	23	0	0	0
EV fmo-4 KO	EV	fmo-4 KO	0	0	0	0
EV fmo-4 KO	EV	fmo-4 KO	2	5	0	0
EV fmo-4 KO	EV	fmo-4 KO	5	18	0	0
EV fmo-4 KO	EV	fmo-4 KO	7	29	0	0
EV fmo-4 KO	EV	fmo-4 KO	9	6	0	0
EV fmo-4 KO	EV	fmo-4 KO	12	0	0	0
EV fmo-4 KO	EV	fmo-4 KO	14	0	0	0
EV fmo-4 KO	EV	fmo-4 KO	16	0	0	0
EV fmo-4 KO	EV	fmo-4 KO	19	0	0	0
EV fmo-4 KO	EV	fmo-4 KO	21	0	0	0
EV fmo-4 KO	EV	fmo-4 KO	23	0	0	0
vdac-1 WT	vdac-1	WT	0	0	0	0
vdac-1 WT	vdac-1	WT	2	15	0	0
vdac-1 WT	vdac-1	WT	5	27	0	0
vdac-1 WT	vdac-1	WT	7	15	0	0
vdac-1 WT	vdac-1	WT	9	0	0	0
vdac-1 WT	vdac-1	WT	12	0	0	0
vdac-1 WT	vdac-1	WT	14	0	0	0
vdac-1 WT	vdac-1	WT	16	0	0	0
vdac-1 WT	vdac-1	WT	19	0	0	0
vdac-1 WT	vdac-1	WT	21	0	0	0
vdac-1 WT	vdac-1	WT	23	0	0	0
vdac-1 fmo-4 OE	vdac-1	fmo-4 OE	0	0	0	0
vdac-1 fmo-4 OE	vdac-1	fmo-4 OE	2	11	0	0
vdac-1 fmo-4 OE	vdac-1	fmo-4 OE	5	17	0	0
vdac-1 fmo-4 OE	vdac-1	fmo-4 OE	7	11	0	0
vdac-1 fmo-4 OE	vdac-1	fmo-4 OE	9	7	0	0
vdac-1 fmo-4 OE	vdac-1	fmo-4 OE	12	0	0	0
vdac-1 fmo-4 OE	vdac-1	fmo-4 OE	14	0	0	0
vdac-1 fmo-4 OE	vdac-1	fmo-4 OE	16	0	0	0
vdac-1 fmo-4 OE	vdac-1	fmo-4 OE	19	0	0	0
vdac-1 fmo-4 OE	vdac-1	fmo-4 OE	21	0	0	0
vdac-1 fmo-4 OE	vdac-1	fmo-4 OE	23	0	0	0
vdac-1 fmo-4 KO	vdac-1	fmo-4 KO	0	0	0	0
vdac-1 fmo-4 KO	vdac-1	fmo-4 KO	2	11	0	0
vdac-1 fmo-4 KO	vdac-1	fmo-4 KO	5	21	0	0
vdac-1 fmo-4 KO	vdac-1	fmo-4 KO	7	15	0	0
vdac-1 fmo-4 KO	vdac-1	fmo-4 KO	9	6	0	0
vdac-1 fmo-4 KO	vdac-1	fmo-4 KO	12	0	0	0
vdac-1 fmo-4 KO	vdac-1	fmo-4 KO	14	0	0	0
vdac-1 fmo-4 KO	vdac-1	fmo-4 KO	16	0	0	0
vdac-1 fmo-4 KO	vdac-1	fmo-4 KO	19	0	0	0
vdac-1 fmo-4 KO	vdac-1	fmo-4 KO	21	0	0	0
vdac-1 fmo-4 KO	vdac-1	fmo-4 KO	23	0	0	0
