# Supplementary material for: fmo-4 promotes longevity and stress resistance via ER to mitochondria calcium regulation in C. elegans
Source: eLife journal article supplement (doi:10.7554/elife.99971), 2024-08-27
Supplement: data3 [file cox regression EV VDAC PQ assay rep 3.xlsx]

## Sheet: data
condition	RNAi	genotype	day	dead normal	dead rupture	censored
EV WT	EV	WT	0	0	0	0
EV WT	EV	WT	1	5	0	0
EV WT	EV	WT	2	5	0	0
EV WT	EV	WT	5	27	0	0
EV WT	EV	WT	7	17	0	0
EV WT	EV	WT	9	12	0	0
EV WT	EV	WT	12	0	0	0
EV WT	EV	WT	14	0	0	0
EV WT	EV	WT	16	0	0	0
EV WT	EV	WT	19	0	0	0
EV WT	EV	WT	21	0	0	0
EV fmo-4 OE	EV	fmo-4 OE	0	0	0	0
EV fmo-4 OE	EV	fmo-4 OE	1	0	0	0
EV fmo-4 OE	EV	fmo-4 OE	2	3	0	0
EV fmo-4 OE	EV	fmo-4 OE	5	11	0	0
EV fmo-4 OE	EV	fmo-4 OE	7	14	0	0
EV fmo-4 OE	EV	fmo-4 OE	9	16	0	0
EV fmo-4 OE	EV	fmo-4 OE	12	28	0	0
EV fmo-4 OE	EV	fmo-4 OE	14	17	0	0
EV fmo-4 OE	EV	fmo-4 OE	16	0	0	0
EV fmo-4 OE	EV	fmo-4 OE	19	0	0	0
EV fmo-4 OE	EV	fmo-4 OE	21	0	0	0
EV fmo-4 KO	EV	fmo-4 KO	0	0	0	0
EV fmo-4 KO	EV	fmo-4 KO	1	5	0	0
EV fmo-4 KO	EV	fmo-4 KO	2	4	0	0
EV fmo-4 KO	EV	fmo-4 KO	5	25	0	0
EV fmo-4 KO	EV	fmo-4 KO	7	26	0	0
EV fmo-4 KO	EV	fmo-4 KO	9	18	0	0
EV fmo-4 KO	EV	fmo-4 KO	12	0	0	0
EV fmo-4 KO	EV	fmo-4 KO	14	0	0	0
EV fmo-4 KO	EV	fmo-4 KO	16	0	0	0
EV fmo-4 KO	EV	fmo-4 KO	19	0	0	0
EV fmo-4 KO	EV	fmo-4 KO	21	0	0	0
vdac-1 WT	vdac-1	WT	0	0	0	0
vdac-1 WT	vdac-1	WT	1	4	0	0
vdac-1 WT	vdac-1	WT	2	14	0	0
vdac-1 WT	vdac-1	WT	5	42	0	0
vdac-1 WT	vdac-1	WT	7	12	0	0
vdac-1 WT	vdac-1	WT	9	6	0	0
vdac-1 WT	vdac-1	WT	12	0	0	0
vdac-1 WT	vdac-1	WT	14	0	0	0
vdac-1 WT	vdac-1	WT	16	0	0	0
vdac-1 WT	vdac-1	WT	19	0	0	0
vdac-1 WT	vdac-1	WT	21	0	0	0
vdac-1 fmo-4 OE	vdac-1	fmo-4 OE	0	0	0	0
vdac-1 fmo-4 OE	vdac-1	fmo-4 OE	1	2	0	0
vdac-1 fmo-4 OE	vdac-1	fmo-4 OE	2	10	0	0
vdac-1 fmo-4 OE	vdac-1	fmo-4 OE	5	25	0	0
vdac-1 fmo-4 OE	vdac-1	fmo-4 OE	7	21	0	0
vdac-1 fmo-4 OE	vdac-1	fmo-4 OE	9	6	0	0
vdac-1 fmo-4 OE	vdac-1	fmo-4 OE	12	0	0	0
vdac-1 fmo-4 OE	vdac-1	fmo-4 OE	14	0	0	0
vdac-1 fmo-4 OE	vdac-1	fmo-4 OE	16	0	0	0
vdac-1 fmo-4 OE	vdac-1	fmo-4 OE	19	0	0	0
vdac-1 fmo-4 OE	vdac-1	fmo-4 OE	21	0	0	0
vdac-1 fmo-4 KO	vdac-1	fmo-4 KO	0	0	0	0
vdac-1 fmo-4 KO	vdac-1	fmo-4 KO	1	5	0	0
vdac-1 fmo-4 KO	vdac-1	fmo-4 KO	2	8	0	0
vdac-1 fmo-4 KO	vdac-1	fmo-4 KO	5	22	0	0
vdac-1 fmo-4 KO	vdac-1	fmo-4 KO	7	25	0	0
vdac-1 fmo-4 KO	vdac-1	fmo-4 KO	9	14	0	0
vdac-1 fmo-4 KO	vdac-1	fmo-4 KO	12	0	0	0
vdac-1 fmo-4 KO	vdac-1	fmo-4 KO	14	0	0	0
vdac-1 fmo-4 KO	vdac-1	fmo-4 KO	16	0	0	0
vdac-1 fmo-4 KO	vdac-1	fmo-4 KO	19	0	0	0
vdac-1 fmo-4 KO	vdac-1	fmo-4 KO	21	0	0	0
