# Supplementary material for: fmo-4 promotes longevity and stress resistance via ER to mitochondria calcium regulation in C. elegans
Source: eLife journal article supplement (doi:10.7554/elife.99971), 2024-08-27
Supplement: data3 [file cox regression EV VHL1 rep 1.xlsx]

## Sheet: data
condition	RNAi	genotype	day	dead normal	dead rupture	censored
EV WT	EV	WT	10	0	0	0
EV WT	EV	WT	13	5	0	0
EV WT	EV	WT	15	1	0	0
EV WT	EV	WT	17	4	0	0
EV WT	EV	WT	20	11	0	0
EV WT	EV	WT	22	16	0	0
EV WT	EV	WT	24	20	0	0
EV WT	EV	WT	27	35	0	0
EV WT	EV	WT	29	17	0	0
EV WT	EV	WT	31	9	0	0
EV WT	EV	WT	34	1	0	0
EV WT	EV	WT	36	0	0	0
EV WT	EV	WT	38	0	0	0
EV WT	EV	WT	41	0	0	0
EV fmo-4 OE	EV	fmo-4 OE	10	0	0	0
EV fmo-4 OE	EV	fmo-4 OE	13	7	0	0
EV fmo-4 OE	EV	fmo-4 OE	15	3	0	0
EV fmo-4 OE	EV	fmo-4 OE	17	6	0	0
EV fmo-4 OE	EV	fmo-4 OE	20	6	0	0
EV fmo-4 OE	EV	fmo-4 OE	22	4	0	0
EV fmo-4 OE	EV	fmo-4 OE	24	10	0	0
EV fmo-4 OE	EV	fmo-4 OE	27	15	0	0
EV fmo-4 OE	EV	fmo-4 OE	29	24	0	0
EV fmo-4 OE	EV	fmo-4 OE	31	19	0	0
EV fmo-4 OE	EV	fmo-4 OE	34	16	0	0
EV fmo-4 OE	EV	fmo-4 OE	36	1	0	0
EV fmo-4 OE	EV	fmo-4 OE	38	2	0	0
EV fmo-4 OE	EV	fmo-4 OE	41	0	0	0
EV fmo-4 KO	EV	fmo-4 KO	10	0	0	0
EV fmo-4 KO	EV	fmo-4 KO	13	6	0	0
EV fmo-4 KO	EV	fmo-4 KO	15	5	0	0
EV fmo-4 KO	EV	fmo-4 KO	17	5	0	0
EV fmo-4 KO	EV	fmo-4 KO	20	4	0	0
EV fmo-4 KO	EV	fmo-4 KO	22	8	0	0
EV fmo-4 KO	EV	fmo-4 KO	24	19	0	0
EV fmo-4 KO	EV	fmo-4 KO	27	20	0	0
EV fmo-4 KO	EV	fmo-4 KO	29	16	0	0
EV fmo-4 KO	EV	fmo-4 KO	31	4	0	0
EV fmo-4 KO	EV	fmo-4 KO	34	0	0	0
EV fmo-4 KO	EV	fmo-4 KO	36	0	0	0
EV fmo-4 KO	EV	fmo-4 KO	38	0	0	0
EV fmo-4 KO	EV	fmo-4 KO	41	0	0	0
vhl-1 WT	vhl-1	WT	10	4	0	0
vhl-1 WT	vhl-1	WT	13	0	0	0
vhl-1 WT	vhl-1	WT	15	2	0	0
vhl-1 WT	vhl-1	WT	17	4	0	0
vhl-1 WT	vhl-1	WT	20	7	0	0
vhl-1 WT	vhl-1	WT	22	21	0	0
vhl-1 WT	vhl-1	WT	24	21	0	0
vhl-1 WT	vhl-1	WT	27	35	0	0
vhl-1 WT	vhl-1	WT	29	23	0	0
vhl-1 WT	vhl-1	WT	31	4	0	0
vhl-1 WT	vhl-1	WT	34	1	0	0
vhl-1 WT	vhl-1	WT	36	0	0	0
vhl-1 WT	vhl-1	WT	38	0	0	0
vhl-1 WT	vhl-1	WT	41	0	0	0
vhl-1 fmo-4 OE	vhl-1	fmo-4 OE	10	1	0	0
vhl-1 fmo-4 OE	vhl-1	fmo-4 OE	13	1	0	0
vhl-1 fmo-4 OE	vhl-1	fmo-4 OE	15	3	0	0
vhl-1 fmo-4 OE	vhl-1	fmo-4 OE	17	5	0	0
vhl-1 fmo-4 OE	vhl-1	fmo-4 OE	20	5	0	0
vhl-1 fmo-4 OE	vhl-1	fmo-4 OE	22	10	0	0
vhl-1 fmo-4 OE	vhl-1	fmo-4 OE	24	13	0	0
vhl-1 fmo-4 OE	vhl-1	fmo-4 OE	27	31	0	0
vhl-1 fmo-4 OE	vhl-1	fmo-4 OE	29	34	0	0
vhl-1 fmo-4 OE	vhl-1	fmo-4 OE	31	13	0	0
vhl-1 fmo-4 OE	vhl-1	fmo-4 OE	34	3	0	0
vhl-1 fmo-4 OE	vhl-1	fmo-4 OE	36	2	0	0
vhl-1 fmo-4 OE	vhl-1	fmo-4 OE	38	1	0	0
vhl-1 fmo-4 OE	vhl-1	fmo-4 OE	41	0	0	0
vhl-1 fmo-4 KO	vhl-1	fmo-4 KO	10	3	0	0
vhl-1 fmo-4 KO	vhl-1	fmo-4 KO	13	3	0	0
vhl-1 fmo-4 KO	vhl-1	fmo-4 KO	15	4	0	0
vhl-1 fmo-4 KO	vhl-1	fmo-4 KO	17	10	0	0
vhl-1 fmo-4 KO	vhl-1	fmo-4 KO	20	11	0	0
vhl-1 fmo-4 KO	vhl-1	fmo-4 KO	22	20	0	0
vhl-1 fmo-4 KO	vhl-1	fmo-4 KO	24	22	0	0
vhl-1 fmo-4 KO	vhl-1	fmo-4 KO	27	18	0	0
vhl-1 fmo-4 KO	vhl-1	fmo-4 KO	29	19	0	0
vhl-1 fmo-4 KO	vhl-1	fmo-4 KO	31	11	0	0
vhl-1 fmo-4 KO	vhl-1	fmo-4 KO	34	0	0	0
vhl-1 fmo-4 KO	vhl-1	fmo-4 KO	36	1	0	0
vhl-1 fmo-4 KO	vhl-1	fmo-4 KO	38	0	0	0
vhl-1 fmo-4 KO	vhl-1	fmo-4 KO	41	0	0	0
