# Supplementary material for: fmo-4 promotes longevity and stress resistance via ER to mitochondria calcium regulation in C. elegans
Source: eLife journal article supplement (doi:10.7554/elife.99971), 2024-08-27
Supplement: data3 [file cox regression EV VHL1 rep 4.xlsx]

## Sheet: data
condition	RNAi	genotype	day	dead normal	dead rupture	censored
EV WT	EV	WT	10	0	0	0
EV WT	EV	WT	12	3	0	0
EV WT	EV	WT	14	4	0	0
EV WT	EV	WT	17	12	0	0
EV WT	EV	WT	19	15	0	0
EV WT	EV	WT	21	20	0	0
EV WT	EV	WT	24	16	0	0
EV WT	EV	WT	26	13	0	0
EV WT	EV	WT	28	10	0	0
EV WT	EV	WT	31	8	0	0
EV WT	EV	WT	33	6	0	0
EV WT	EV	WT	35	8	0	0
EV WT	EV	WT	38	0	0	0
EV WT	EV	WT	40	0	0	0
EV fmo-4 OE	EV	fmo-4 OE	10	0	0	0
EV fmo-4 OE	EV	fmo-4 OE	12	1	0	0
EV fmo-4 OE	EV	fmo-4 OE	14	2	0	0
EV fmo-4 OE	EV	fmo-4 OE	17	2	0	0
EV fmo-4 OE	EV	fmo-4 OE	19	2	0	0
EV fmo-4 OE	EV	fmo-4 OE	21	8	0	0
EV fmo-4 OE	EV	fmo-4 OE	24	6	0	0
EV fmo-4 OE	EV	fmo-4 OE	26	12	0	0
EV fmo-4 OE	EV	fmo-4 OE	28	11	0	0
EV fmo-4 OE	EV	fmo-4 OE	31	19	0	0
EV fmo-4 OE	EV	fmo-4 OE	33	22	0	0
EV fmo-4 OE	EV	fmo-4 OE	35	4	0	0
EV fmo-4 OE	EV	fmo-4 OE	38	8	0	0
EV fmo-4 OE	EV	fmo-4 OE	40	10	0	0
EV fmo-4 KO	EV	fmo-4 KO	10	0	0	0
EV fmo-4 KO	EV	fmo-4 KO	12	2	0	0
EV fmo-4 KO	EV	fmo-4 KO	14	2	0	0
EV fmo-4 KO	EV	fmo-4 KO	17	7	0	0
EV fmo-4 KO	EV	fmo-4 KO	19	14	0	0
EV fmo-4 KO	EV	fmo-4 KO	21	11	0	0
EV fmo-4 KO	EV	fmo-4 KO	24	21	0	0
EV fmo-4 KO	EV	fmo-4 KO	26	23	0	0
EV fmo-4 KO	EV	fmo-4 KO	28	6	0	0
EV fmo-4 KO	EV	fmo-4 KO	31	14	0	0
EV fmo-4 KO	EV	fmo-4 KO	33	3	0	0
EV fmo-4 KO	EV	fmo-4 KO	35	2	0	0
EV fmo-4 KO	EV	fmo-4 KO	38	0	0	0
EV fmo-4 KO	EV	fmo-4 KO	40	0	0	0
vhl-1 WT	vhl-1	WT	10	0	0	0
vhl-1 WT	vhl-1	WT	12	0	0	0
vhl-1 WT	vhl-1	WT	14	0	0	0
vhl-1 WT	vhl-1	WT	17	5	0	0
vhl-1 WT	vhl-1	WT	19	9	0	0
vhl-1 WT	vhl-1	WT	21	3	0	0
vhl-1 WT	vhl-1	WT	24	13	0	0
vhl-1 WT	vhl-1	WT	26	9	0	0
vhl-1 WT	vhl-1	WT	28	16	0	0
vhl-1 WT	vhl-1	WT	31	24	0	0
vhl-1 WT	vhl-1	WT	33	11	0	0
vhl-1 WT	vhl-1	WT	35	8	0	0
vhl-1 WT	vhl-1	WT	38	5	0	0
vhl-1 WT	vhl-1	WT	40	8	0	0
vhl-1 fmo-4 OE	vhl-1	fmo-4 OE	10	0	0	0
vhl-1 fmo-4 OE	vhl-1	fmo-4 OE	12	0	0	0
vhl-1 fmo-4 OE	vhl-1	fmo-4 OE	14	1	0	0
vhl-1 fmo-4 OE	vhl-1	fmo-4 OE	17	6	0	0
vhl-1 fmo-4 OE	vhl-1	fmo-4 OE	19	4	0	0
vhl-1 fmo-4 OE	vhl-1	fmo-4 OE	21	5	0	0
vhl-1 fmo-4 OE	vhl-1	fmo-4 OE	24	9	0	0
vhl-1 fmo-4 OE	vhl-1	fmo-4 OE	26	13	0	0
vhl-1 fmo-4 OE	vhl-1	fmo-4 OE	28	19	0	0
vhl-1 fmo-4 OE	vhl-1	fmo-4 OE	31	20	0	0
vhl-1 fmo-4 OE	vhl-1	fmo-4 OE	33	11	0	0
vhl-1 fmo-4 OE	vhl-1	fmo-4 OE	35	10	0	0
vhl-1 fmo-4 OE	vhl-1	fmo-4 OE	38	5	0	0
vhl-1 fmo-4 OE	vhl-1	fmo-4 OE	40	5	0	0
vhl-1 fmo-4 KO	vhl-1	fmo-4 KO	10	0	0	0
vhl-1 fmo-4 KO	vhl-1	fmo-4 KO	12	1	0	0
vhl-1 fmo-4 KO	vhl-1	fmo-4 KO	14	1	0	0
vhl-1 fmo-4 KO	vhl-1	fmo-4 KO	17	6	0	0
vhl-1 fmo-4 KO	vhl-1	fmo-4 KO	19	7	0	0
vhl-1 fmo-4 KO	vhl-1	fmo-4 KO	21	7	0	0
vhl-1 fmo-4 KO	vhl-1	fmo-4 KO	24	17	0	0
vhl-1 fmo-4 KO	vhl-1	fmo-4 KO	26	10	0	0
vhl-1 fmo-4 KO	vhl-1	fmo-4 KO	28	17	0	0
vhl-1 fmo-4 KO	vhl-1	fmo-4 KO	31	21	0	0
vhl-1 fmo-4 KO	vhl-1	fmo-4 KO	33	5	0	0
vhl-1 fmo-4 KO	vhl-1	fmo-4 KO	35	8	0	0
vhl-1 fmo-4 KO	vhl-1	fmo-4 KO	38	4	0	0
vhl-1 fmo-4 KO	vhl-1	fmo-4 KO	40	5	0	0
