# Supplementary material for: fmo-4 promotes longevity and stress resistance via ER to mitochondria calcium regulation in C. elegans
Source: eLife journal article supplement (doi:10.7554/elife.99971), 2024-08-27
Supplement: data3 [file elife-99971-data3-v1.zip]

## Sheet: data
condition	RNAi	genotype	day	dead normal	dead rupture	censored
EV WT	EV	WT	10	0	0	0
EV WT	EV	WT	14	2	0	0
EV WT	EV	WT	16	5	0	0
EV WT	EV	WT	18	11	0	0
EV WT	EV	WT	21	13	0	0
EV WT	EV	WT	23	38	0	0
EV WT	EV	WT	25	19	0	0
EV WT	EV	WT	28	22	0	0
EV WT	EV	WT	30	8	0	0
EV WT	EV	WT	32	2	0	0
EV WT	EV	WT	35	0	0	0
EV WT	EV	WT	37	0	0	0
EV WT	EV	WT	39	0	0	0
EV fmo-4 OE	EV	fmo-4 OE	10	0	0	0
EV fmo-4 OE	EV	fmo-4 OE	14	0	0	0
EV fmo-4 OE	EV	fmo-4 OE	16	2	0	0
EV fmo-4 OE	EV	fmo-4 OE	18	4	0	0
EV fmo-4 OE	EV	fmo-4 OE	21	6	0	0
EV fmo-4 OE	EV	fmo-4 OE	23	13	0	0
EV fmo-4 OE	EV	fmo-4 OE	25	19	0	0
EV fmo-4 OE	EV	fmo-4 OE	28	18	0	0
EV fmo-4 OE	EV	fmo-4 OE	30	19	0	0
EV fmo-4 OE	EV	fmo-4 OE	32	9	0	0
EV fmo-4 OE	EV	fmo-4 OE	35	3	0	0
EV fmo-4 OE	EV	fmo-4 OE	37	5	0	0
EV fmo-4 OE	EV	fmo-4 OE	39	0	0	0
EV fmo-4 KO	EV	fmo-4 KO	10	0	0	0
EV fmo-4 KO	EV	fmo-4 KO	14	4	0	0
EV fmo-4 KO	EV	fmo-4 KO	16	6	0	0
EV fmo-4 KO	EV	fmo-4 KO	18	12	0	0
EV fmo-4 KO	EV	fmo-4 KO	21	22	0	0
EV fmo-4 KO	EV	fmo-4 KO	23	44	0	0
EV fmo-4 KO	EV	fmo-4 KO	25	33	0	0
EV fmo-4 KO	EV	fmo-4 KO	28	7	0	0
EV fmo-4 KO	EV	fmo-4 KO	30	3	0	0
EV fmo-4 KO	EV	fmo-4 KO	32	0	0	0
EV fmo-4 KO	EV	fmo-4 KO	35	0	0	0
EV fmo-4 KO	EV	fmo-4 KO	37	0	0	0
EV fmo-4 KO	EV	fmo-4 KO	39	0	0	0
crt-1 WT	crt-1	WT	10	0	0	0
crt-1 WT	crt-1	WT	14	0	0	0
crt-1 WT	crt-1	WT	16	0	0	0
crt-1 WT	crt-1	WT	18	5	0	0
crt-1 WT	crt-1	WT	21	8	0	0
crt-1 WT	crt-1	WT	23	15	0	0
crt-1 WT	crt-1	WT	25	27	0	0
crt-1 WT	crt-1	WT	28	24	0	0
crt-1 WT	crt-1	WT	30	17	0	0
crt-1 WT	crt-1	WT	32	6	0	0
crt-1 WT	crt-1	WT	35	7	0	0
crt-1 WT	crt-1	WT	37	2	0	0
crt-1 WT	crt-1	WT	39	0	0	0
crt-1 fmo-4 OE	crt-1	fmo-4 OE	10	0	0	0
crt-1 fmo-4 OE	crt-1	fmo-4 OE	14	0	0	0
crt-1 fmo-4 OE	crt-1	fmo-4 OE	16	0	0	0
crt-1 fmo-4 OE	crt-1	fmo-4 OE	18	5	0	0
crt-1 fmo-4 OE	crt-1	fmo-4 OE	21	8	0	0
crt-1 fmo-4 OE	crt-1	fmo-4 OE	23	14	0	0
crt-1 fmo-4 OE	crt-1	fmo-4 OE	25	18	0	0
crt-1 fmo-4 OE	crt-1	fmo-4 OE	28	20	0	0
crt-1 fmo-4 OE	crt-1	fmo-4 OE	30	12	0	0
crt-1 fmo-4 OE	crt-1	fmo-4 OE	32	8	0	0
crt-1 fmo-4 OE	crt-1	fmo-4 OE	35	11	0	0
crt-1 fmo-4 OE	crt-1	fmo-4 OE	37	5	0	0
crt-1 fmo-4 OE	crt-1	fmo-4 OE	39	2	0	0
crt-1 fmo-4 KO	crt-1	fmo-4 KO	10	0	0	0
crt-1 fmo-4 KO	crt-1	fmo-4 KO	14	0	0	0
crt-1 fmo-4 KO	crt-1	fmo-4 KO	16	1	0	0
crt-1 fmo-4 KO	crt-1	fmo-4 KO	18	8	0	0
crt-1 fmo-4 KO	crt-1	fmo-4 KO	21	8	0	0
crt-1 fmo-4 KO	crt-1	fmo-4 KO	23	27	0	0
crt-1 fmo-4 KO	crt-1	fmo-4 KO	25	28	0	0
crt-1 fmo-4 KO	crt-1	fmo-4 KO	28	16	0	0
crt-1 fmo-4 KO	crt-1	fmo-4 KO	30	9	0	0
crt-1 fmo-4 KO	crt-1	fmo-4 KO	32	7	0	0
crt-1 fmo-4 KO	crt-1	fmo-4 KO	35	4	0	0
crt-1 fmo-4 KO	crt-1	fmo-4 KO	37	0	0	0
crt-1 fmo-4 KO	crt-1	fmo-4 KO	39	0	0	0
mcu-1 WT	mcu-1	WT	10	0	0	0
mcu-1 WT	mcu-1	WT	14	3	0	0
mcu-1 WT	mcu-1	WT	16	6	0	0
mcu-1 WT	mcu-1	WT	18	10	0	0
mcu-1 WT	mcu-1	WT	21	26	0	0
mcu-1 WT	mcu-1	WT	23	30	0	0
mcu-1 WT	mcu-1	WT	25	20	0	0
mcu-1 WT	mcu-1	WT	28	23	0	0
mcu-1 WT	mcu-1	WT	30	5	0	0
mcu-1 WT	mcu-1	WT	32	1	0	0
mcu-1 WT	mcu-1	WT	35	0	0	0
mcu-1 WT	mcu-1	WT	37	0	0	0
mcu-1 WT	mcu-1	WT	39	0	0	0
mcu-1 fmo-4 OE	mcu-1	fmo-4 OE	10	0	0	0
mcu-1 fmo-4 OE	mcu-1	fmo-4 OE	14	3	0	0
mcu-1 fmo-4 OE	mcu-1	fmo-4 OE	16	8	0	0
mcu-1 fmo-4 OE	mcu-1	fmo-4 OE	18	10	0	0
mcu-1 fmo-4 OE	mcu-1	fmo-4 OE	21	13	0	0
mcu-1 fmo-4 OE	mcu-1	fmo-4 OE	23	18	0	0
mcu-1 fmo-4 OE	mcu-1	fmo-4 OE	25	8	0	0
mcu-1 fmo-4 OE	mcu-1	fmo-4 OE	28	6	0	0
mcu-1 fmo-4 OE	mcu-1	fmo-4 OE	30	2	0	0
mcu-1 fmo-4 OE	mcu-1	fmo-4 OE	32	2	0	0
mcu-1 fmo-4 OE	mcu-1	fmo-4 OE	35	0	0	0
mcu-1 fmo-4 OE	mcu-1	fmo-4 OE	37	0	0	0
mcu-1 fmo-4 OE	mcu-1	fmo-4 OE	39	0	0	0
mcu-1 fmo-4 KO	mcu-1	fmo-4 KO	10	0	0	0
mcu-1 fmo-4 KO	mcu-1	fmo-4 KO	14	5	0	0
mcu-1 fmo-4 KO	mcu-1	fmo-4 KO	16	11	0	0
mcu-1 fmo-4 KO	mcu-1	fmo-4 KO	18	17	0	0
mcu-1 fmo-4 KO	mcu-1	fmo-4 KO	21	27	0	0
mcu-1 fmo-4 KO	mcu-1	fmo-4 KO	23	26	0	0
mcu-1 fmo-4 KO	mcu-1	fmo-4 KO	25	4	0	0
mcu-1 fmo-4 KO	mcu-1	fmo-4 KO	28	1	0	0
mcu-1 fmo-4 KO	mcu-1	fmo-4 KO	30	0	0	0
mcu-1 fmo-4 KO	mcu-1	fmo-4 KO	32	0	0	0
mcu-1 fmo-4 KO	mcu-1	fmo-4 KO	35	0	0	0
mcu-1 fmo-4 KO	mcu-1	fmo-4 KO	37	0	0	0
mcu-1 fmo-4 KO	mcu-1	fmo-4 KO	39	0	0	0
itr-1 WT	itr-1	WT	10	0	0	0
itr-1 WT	itr-1	WT	14	5	0	0
itr-1 WT	itr-1	WT	16	7	0	0
itr-1 WT	itr-1	WT	18	12	0	0
itr-1 WT	itr-1	WT	21	22	0	0
itr-1 WT	itr-1	WT	23	29	0	0
itr-1 WT	itr-1	WT	25	17	0	0
itr-1 WT	itr-1	WT	28	10	0	0
itr-1 WT	itr-1	WT	30	4	0	0
itr-1 WT	itr-1	WT	32	1	0	0
itr-1 WT	itr-1	WT	35	0	0	0
itr-1 WT	itr-1	WT	37	0	0	0
itr-1 WT	itr-1	WT	39	0	0	0
itr-1 fmo-4 OE	itr-1	fmo-4 OE	10	0	0	0
itr-1 fmo-4 OE	itr-1	fmo-4 OE	14	8	0	0
itr-1 fmo-4 OE	itr-1	fmo-4 OE	16	7	0	0
itr-1 fmo-4 OE	itr-1	fmo-4 OE	18	15	0	0
itr-1 fmo-4 OE	itr-1	fmo-4 OE	21	25	0	0
itr-1 fmo-4 OE	itr-1	fmo-4 OE	23	31	0	0
itr-1 fmo-4 OE	itr-1	fmo-4 OE	25	10	0	0
itr-1 fmo-4 OE	itr-1	fmo-4 OE	28	5	0	0
itr-1 fmo-4 OE	itr-1	fmo-4 OE	30	2	0	0
itr-1 fmo-4 OE	itr-1	fmo-4 OE	32	0	0	0
itr-1 fmo-4 OE	itr-1	fmo-4 OE	35	0	0	0
itr-1 fmo-4 OE	itr-1	fmo-4 OE	37	0	0	0
itr-1 fmo-4 OE	itr-1	fmo-4 OE	39	0	0	0
itr-1 fmo-4 KO	itr-1	fmo-4 KO	10	0	0	0
itr-1 fmo-4 KO	itr-1	fmo-4 KO	14	10	0	0
itr-1 fmo-4 KO	itr-1	fmo-4 KO	16	12	0	0
itr-1 fmo-4 KO	itr-1	fmo-4 KO	18	20	0	0
itr-1 fmo-4 KO	itr-1	fmo-4 KO	21	36	0	0
itr-1 fmo-4 KO	itr-1	fmo-4 KO	23	33	0	0
itr-1 fmo-4 KO	itr-1	fmo-4 KO	25	6	0	0
itr-1 fmo-4 KO	itr-1	fmo-4 KO	28	1	0	0
itr-1 fmo-4 KO	itr-1	fmo-4 KO	30	0	0	0
itr-1 fmo-4 KO	itr-1	fmo-4 KO	32	0	0	0
itr-1 fmo-4 KO	itr-1	fmo-4 KO	35	0	0	0
itr-1 fmo-4 KO	itr-1	fmo-4 KO	37	0	0	0
itr-1 fmo-4 KO	itr-1	fmo-4 KO	39	0	0	0
