# Supplementary material for: fmo-4 promotes longevity and stress resistance via ER to mitochondria calcium regulation in C. elegans
Source: eLife journal article supplement (doi:10.7554/elife.99971), 2024-08-27
Supplement: fig1-data1 [file DR rep 2.xls]

## Sheet: data
condition	genotype	fed DR	technical replicate	day	dead normal	dead rupture	censored
WT fed	WT	fed	A	10	0	0	0
WT fed	WT	fed	A	12	0	0	0
WT fed	WT	fed	A	14	3	0	0
WT fed	WT	fed	A	17	4	0	0
WT fed	WT	fed	A	19	5	0	0
WT fed	WT	fed	A	21	5	0	0
WT fed	WT	fed	A	24	13	0	0
WT fed	WT	fed	A	26	9	0	0
WT fed	WT	fed	A	28	16	0	0
WT fed	WT	fed	A	31	6	0	0
WT fed	WT	fed	B	10	0	0	0
WT fed	WT	fed	B	12	0	0	0
WT fed	WT	fed	B	14	2	0	0
WT fed	WT	fed	B	17	3	0	0
WT fed	WT	fed	B	19	2	0	0
WT fed	WT	fed	B	21	3	0	0
WT fed	WT	fed	B	24	9	0	0
WT fed	WT	fed	B	26	14	0	0
WT fed	WT	fed	B	28	23	0	0
WT fed	WT	fed	B	31	9	0	0
WT DR	WT	DR	A	10	0	0	0
WT DR	WT	DR	A	12	0	0	0
WT DR	WT	DR	A	14	0	0	0
WT DR	WT	DR	A	17	0	0	0
WT DR	WT	DR	A	19	0	0	0
WT DR	WT	DR	A	21	0	0	0
WT DR	WT	DR	A	24	2	0	0
WT DR	WT	DR	A	26	4	0	0
WT DR	WT	DR	A	28	8	0	0
WT DR	WT	DR	A	31	11	0	0
WT DR	WT	DR	B	10	0	0	0
WT DR	WT	DR	B	12	0	0	0
WT DR	WT	DR	B	14	0	0	0
WT DR	WT	DR	B	17	0	0	0
WT DR	WT	DR	B	19	1	0	0
WT DR	WT	DR	B	21	0	0	0
WT DR	WT	DR	B	24	1	0	0
WT DR	WT	DR	B	26	1	0	0
WT DR	WT	DR	B	28	0	0	0
WT DR	WT	DR	B	31	5	0	0
WT fed	WT	fed	A	33	4	0	0
WT fed	WT	fed	A	35	2	0	0
WT fed	WT	fed	B	33	3	0	0
WT fed	WT	fed	B	35	3	0	0
WT DR	WT	DR	A	33	17	0	0
WT DR	WT	DR	A	35	3	0	0
WT DR	WT	DR	A	38	1	0	0
WT DR	WT	DR	A	40	2	0	0
WT DR	WT	DR	B	33	10	0	0
WT DR	WT	DR	B	35	2	0	0
WT DR	WT	DR	B	38	1	0	0
WT DR	WT	DR	B	40	4	0	0
fmo-4 KO fed	fmo-4 KO	fed	A	10	0	0	0
fmo-4 KO fed	fmo-4 KO	fed	A	12	0	0	0
fmo-4 KO fed	fmo-4 KO	fed	A	14	3	0	0
fmo-4 KO fed	fmo-4 KO	fed	A	17	8	0	0
fmo-4 KO fed	fmo-4 KO	fed	A	19	5	0	0
fmo-4 KO fed	fmo-4 KO	fed	A	21	15	0	0
fmo-4 KO fed	fmo-4 KO	fed	A	24	11	0	0
fmo-4 KO fed	fmo-4 KO	fed	A	26	6	0	0
fmo-4 KO fed	fmo-4 KO	fed	A	28	6	0	0
fmo-4 KO fed	fmo-4 KO	fed	A	31	10	0	0
fmo-4 KO fed	fmo-4 KO	fed	A	33	5	0	0
fmo-4 KO fed	fmo-4 KO	fed	B	10	0	0	0
fmo-4 KO fed	fmo-4 KO	fed	B	12	0	0	0
fmo-4 KO fed	fmo-4 KO	fed	B	14	1	0	0
fmo-4 KO fed	fmo-4 KO	fed	B	17	8	0	0
fmo-4 KO fed	fmo-4 KO	fed	B	19	9	0	0
fmo-4 KO fed	fmo-4 KO	fed	B	21	8	0	0
fmo-4 KO fed	fmo-4 KO	fed	B	24	9	0	0
fmo-4 KO fed	fmo-4 KO	fed	B	26	6	0	0
fmo-4 KO fed	fmo-4 KO	fed	B	28	4	0	0
fmo-4 KO fed	fmo-4 KO	fed	B	31	12	0	0
fmo-4 KO fed	fmo-4 KO	fed	B	33	5	0	0
fmo-4 KO fed	fmo-4 KO	fed	B	35	4	0	0
fmo-4 KO DR	fmo-4 KO	DR	B	10	0	0	0
fmo-4 KO DR	fmo-4 KO	DR	B	12	0	0	0
fmo-4 KO DR	fmo-4 KO	DR	B	14	0	0	0
fmo-4 KO DR	fmo-4 KO	DR	B	17	2	0	0
fmo-4 KO DR	fmo-4 KO	DR	B	19	2	0	0
fmo-4 KO DR	fmo-4 KO	DR	B	21	1	0	0
fmo-4 KO DR	fmo-4 KO	DR	B	24	5	0	0
fmo-4 KO DR	fmo-4 KO	DR	B	26	3	0	0
fmo-4 KO DR	fmo-4 KO	DR	B	28	4	0	0
fmo-4 KO DR	fmo-4 KO	DR	B	31	14	0	0
fmo-4 KO DR	fmo-4 KO	DR	B	33	15	0	0
fmo-4 KO DR	fmo-4 KO	DR	B	35	5	0	0
fmo-4 OE fed	fmo-4 OE	fed	A	10	0	0	0
fmo-4 OE fed	fmo-4 OE	fed	A	12	0	0	0
fmo-4 OE fed	fmo-4 OE	fed	A	14	1	0	0
fmo-4 OE fed	fmo-4 OE	fed	A	17	2	0	0
fmo-4 OE fed	fmo-4 OE	fed	A	19	7	0	0
fmo-4 OE fed	fmo-4 OE	fed	A	21	5	0	0
fmo-4 OE fed	fmo-4 OE	fed	A	24	11	0	0
fmo-4 OE fed	fmo-4 OE	fed	A	26	11	0	0
fmo-4 OE fed	fmo-4 OE	fed	A	28	22	0	0
fmo-4 OE fed	fmo-4 OE	fed	A	31	8	0	0
fmo-4 OE fed	fmo-4 OE	fed	A	33	10	0	0
fmo-4 OE fed	fmo-4 OE	fed	A	35	2	0	0
fmo-4 OE fed	fmo-4 OE	fed	A	38	4	0	0
fmo-4 OE fed	fmo-4 OE	fed	B	10	0	0	0
fmo-4 OE fed	fmo-4 OE	fed	B	12	0	0	0
fmo-4 OE fed	fmo-4 OE	fed	B	14	1	0	0
fmo-4 OE fed	fmo-4 OE	fed	B	17	3	0	0
fmo-4 OE fed	fmo-4 OE	fed	B	19	5	0	0
fmo-4 OE fed	fmo-4 OE	fed	B	21	1	0	0
fmo-4 OE fed	fmo-4 OE	fed	B	24	4	0	0
fmo-4 OE fed	fmo-4 OE	fed	B	26	9	0	0
fmo-4 OE fed	fmo-4 OE	fed	B	28	10	0	0
fmo-4 OE fed	fmo-4 OE	fed	B	31	18	0	0
fmo-4 OE fed	fmo-4 OE	fed	B	33	13	0	0
fmo-4 OE fed	fmo-4 OE	fed	B	35	7	0	0
fmo-4 OE fed	fmo-4 OE	fed	B	38	2	0	0
fmo-4 OE fed	fmo-4 OE	fed	B	40	2	0	0
fmo-4 OE DR	fmo-4 OE	DR	A	10	0	0	0
fmo-4 OE DR	fmo-4 OE	DR	A	12	0	0	0
fmo-4 OE DR	fmo-4 OE	DR	A	14	1	0	0
fmo-4 OE DR	fmo-4 OE	DR	A	17	1	0	0
fmo-4 OE DR	fmo-4 OE	DR	A	19	0	0	0
fmo-4 OE DR	fmo-4 OE	DR	A	21	2	0	0
fmo-4 OE DR	fmo-4 OE	DR	A	24	3	0	0
fmo-4 OE DR	fmo-4 OE	DR	A	26	3	0	0
fmo-4 OE DR	fmo-4 OE	DR	A	28	6	0	0
fmo-4 OE DR	fmo-4 OE	DR	A	31	13	0	0
fmo-4 OE DR	fmo-4 OE	DR	A	33	20	0	0
fmo-4 OE DR	fmo-4 OE	DR	A	35	15	0	0
fmo-4 OE DR	fmo-4 OE	DR	A	38	10	0	0
fmo-4 OE DR	fmo-4 OE	DR	A	40	4	0	0
fmo-4 OE DR	fmo-4 OE	DR	B	10	0	0	0
fmo-4 OE DR	fmo-4 OE	DR	B	12	0	0	0
fmo-4 OE DR	fmo-4 OE	DR	B	14	1	0	0
fmo-4 OE DR	fmo-4 OE	DR	B	17	2	0	0
fmo-4 OE DR	fmo-4 OE	DR	B	19	0	0	0
fmo-4 OE DR	fmo-4 OE	DR	B	21	1	0	0
fmo-4 OE DR	fmo-4 OE	DR	B	24	3	0	0
fmo-4 OE DR	fmo-4 OE	DR	B	26	2	0	0
fmo-4 OE DR	fmo-4 OE	DR	B	28	7	0	0
fmo-4 OE DR	fmo-4 OE	DR	B	31	23	0	0
fmo-4 OE DR	fmo-4 OE	DR	B	33	31	0	0
fmo-4 OE DR	fmo-4 OE	DR	B	35	12	0	0
fmo-4 OE DR	fmo-4 OE	DR	B	38	19	0	0
fmo-4 OE DR	fmo-4 OE	DR	B	40	12	0	0
fmo-4 OE DR	fmo-4 OE	DR	B	42	5	0	0
fmo-4 OE DR	fmo-4 OE	DR	B	45	4	0	0

## Sheet: stats
% WT fed [135]						condition	chi	pvalue	corrected_pvalue
#days	dead	censored				WT fed v.s. fmo-4 OE fed	18.12	2.1e-05	0.0001
10	0					WT fed v.s. fmo-4 KO fed	1.58	0.2086	1
12	0					WT fed v.s. WT sDR	62.49	0	0
14	5					WT fed v.s. fmo-4OE sdr	166.45	0	0
17	7					WT fed v.s. fmo-4KO sdr	22.99	1.6e-06	8.1e-06
19	7					fmo-4 OE fed v.s. WT fed	18.12	2.1e-05	0.0001
21	8					fmo-4 OE fed v.s. fmo-4 KO fed	25.26	5e-07	2.5e-06
24	22					fmo-4 OE fed v.s. WT sDR	20.45	6.1e-06	3.1e-05
26	23					fmo-4 OE fed v.s. fmo-4OE sdr	80.45	0	0
28	39					fmo-4 OE fed v.s. fmo-4KO sdr	1.78	0.182	0.9099
31	12					fmo-4 KO fed v.s. WT fed	1.58	0.2086	1
33	7					fmo-4 KO fed v.s. fmo-4 OE fed	25.26	5e-07	2.5e-06
35	5					fmo-4 KO fed v.s. WT sDR	62.88	0	0
38						fmo-4 KO fed v.s. fmo-4OE sdr	168.64	0	0
40						fmo-4 KO fed v.s. fmo-4KO sdr	24.89	6.1e-07	3e-06
						WT sDR v.s. WT fed	62.49	0	0
						WT sDR v.s. fmo-4 OE fed	20.45	6.1e-06	3.1e-05
						WT sDR v.s. fmo-4 KO fed	62.88	0	0
						WT sDR v.s. fmo-4OE sdr	8.75	0.0031	0.0154
						WT sDR v.s. fmo-4KO sdr	6.11	0.0134	0.067
						fmo-4OE sdr v.s. WT fed	166.45	0	0
% fmo-4 OE fed [158]						fmo-4OE sdr v.s. fmo-4 OE fed	80.45	0	0
#days	dead	censored				fmo-4OE sdr v.s. fmo-4 KO fed	168.64	0	0
10	0					fmo-4OE sdr v.s. WT sDR	8.75	0.0031	0.0154
12	0					fmo-4OE sdr v.s. fmo-4KO sdr	29.47	5.7e-08	2.8e-07
14	2					fmo-4KO sdr v.s. WT fed	22.99	1.6e-06	8.1e-06
17	5					fmo-4KO sdr v.s. fmo-4 OE fed	1.78	0.182	0.9099
19	12					fmo-4KO sdr v.s. fmo-4 KO fed	24.89	6.1e-07	3e-06
21	6					fmo-4KO sdr v.s. WT sDR	6.11	0.0134	0.067
24	15					fmo-4KO sdr v.s. fmo-4OE sdr	29.47	5.7e-08	2.8e-07
26	20
28	32
31	26
33	23
35	9
38	6
40	2
% fmo-4 KO fed [135]
#days	dead	censored
10	0
12	0
14	4
17	16
19	14
21	23
24	20
26	12
28	10
31	22
33	10
35	4
38
40
% WT sDR [73]
#days	dead	censored
10	0
12	0
14	0
17	0
19	1
21	0
24	3
26	5
28	8
31	16
33	27
35	5
38	2
40	6
% fmo-4OE sdr [200]
#days	dead	censored
10	0
12	0
14	2
17	3
19	0
21	3
24	6
26	5
28	13
31	36
33	51
35	27
38	29
40	16
42	5
45	4
% fmo-4KO sdr [51]
#days	dead	censored
10	0
12	0
14	0
17	2
19	2
21	1
24	5
26	3
28	4
31	14
33	15
35	5
38
40
