# Supplementary material for: fmo-4 promotes longevity and stress resistance via ER to mitochondria calcium regulation in C. elegans
Source: eLife journal article supplement (doi:10.7554/elife.99971), 2024-08-27
Supplement: fig1-data1 [file DR rep 3.xlsx]

## Sheet: data
condition	genotype	fed DR	technical replicate	day	dead normal	dead rupture	censored
WT fed	WT	fed	A	10	0	0	0
WT fed	WT	fed	A	12	1	0	0
WT fed	WT	fed	A	14	6	0	0
WT fed	WT	fed	A	17	15	0	2
WT fed	WT	fed	A	19	11	0	0
WT fed	WT	fed	A	21	17	0	0
WT fed	WT	fed	A	24	15	0	0
WT fed	WT	fed	A	26	4	0	0
WT fed	WT	fed	A	28	3	0	0
WT fed	WT	fed	B	10	0	0	0
WT fed	WT	fed	B	12	2	0	0
WT fed	WT	fed	B	14	5	0	0
WT fed	WT	fed	B	17	6	0	0
WT fed	WT	fed	B	19	14	0	0
WT fed	WT	fed	B	21	13	0	0
WT fed	WT	fed	B	24	12	0	0
WT fed	WT	fed	B	26	7	0	0
WT fed	WT	fed	B	28	3	0	0
WT fed	WT	fed	B	31	3	0	1
WT DR	WT	DR	A	10	0	0	0
WT DR	WT	DR	A	12	0	0	0
WT DR	WT	DR	A	14	7	0	0
WT DR	WT	DR	A	17	3	0	0
WT DR	WT	DR	A	19	1	0	0
WT DR	WT	DR	A	21	2	0	0
WT DR	WT	DR	A	24	2	0	0
WT DR	WT	DR	A	26	2	0	0
WT DR	WT	DR	A	28	6	0	0
WT DR	WT	DR	A	31	9	0	0
WT DR	WT	DR	B	10	0	0	0
WT DR	WT	DR	B	12	0	0	0
WT DR	WT	DR	B	14	3	0	0
WT DR	WT	DR	B	17	1	0	0
WT DR	WT	DR	B	19	2	0	0
WT DR	WT	DR	B	21	4	0	0
WT DR	WT	DR	B	24	5	0	0
WT DR	WT	DR	B	26	3	0	0
WT DR	WT	DR	B	28	5	0	0
WT DR	WT	DR	B	31	21	0	0
WT DR	WT	DR	A	33	10	0	0
WT DR	WT	DR	A	35	5	0	0
WT DR	WT	DR	A	38	8	0	0
WT DR	WT	DR	A	40	1	0	0
WT DR	WT	DR	B	33	18	0	0
WT DR	WT	DR	B	35	14	0	0
WT DR	WT	DR	B	38	9	0	0
WT DR	WT	DR	B	40	4	0	0
fmo-4 KO fed	fmo-4 KO	fed	A	10	0	0	0
fmo-4 KO fed	fmo-4 KO	fed	A	12	0	0	0
fmo-4 KO fed	fmo-4 KO	fed	A	14	0	0	1
fmo-4 KO fed	fmo-4 KO	fed	A	17	3	0	0
fmo-4 KO fed	fmo-4 KO	fed	A	19	4	0	0
fmo-4 KO fed	fmo-4 KO	fed	A	21	12	0	0
fmo-4 KO fed	fmo-4 KO	fed	A	24	10	0	0
fmo-4 KO fed	fmo-4 KO	fed	A	26	8	0	0
fmo-4 KO fed	fmo-4 KO	fed	A	28	4	0	0
fmo-4 KO fed	fmo-4 KO	fed	A	31	1	0	0
fmo-4 KO fed	fmo-4 KO	fed	B	10	0	0	1
fmo-4 KO fed	fmo-4 KO	fed	B	12	1	0	0
fmo-4 KO fed	fmo-4 KO	fed	B	14	0	0	1
fmo-4 KO fed	fmo-4 KO	fed	B	17	0	0	0
fmo-4 KO fed	fmo-4 KO	fed	B	19	6	0	0
fmo-4 KO fed	fmo-4 KO	fed	B	21	16	0	0
fmo-4 KO fed	fmo-4 KO	fed	B	24	5	0	0
fmo-4 KO fed	fmo-4 KO	fed	B	26	4	0	0
fmo-4 KO fed	fmo-4 KO	fed	B	28	4	0	0
fmo-4 KO fed	fmo-4 KO	fed	B	31	2	0	0
fmo-4 KO DR	fmo-4 KO	DR	A	10	0	0	0
fmo-4 KO DR	fmo-4 KO	DR	A	12	0	0	0
fmo-4 KO DR	fmo-4 KO	DR	A	14	0	0	0
fmo-4 KO DR	fmo-4 KO	DR	A	17	4	0	0
fmo-4 KO DR	fmo-4 KO	DR	A	19	7	0	0
fmo-4 KO DR	fmo-4 KO	DR	A	21	4	0	0
fmo-4 KO DR	fmo-4 KO	DR	A	24	4	0	0
fmo-4 KO DR	fmo-4 KO	DR	A	26	9	0	0
fmo-4 KO DR	fmo-4 KO	DR	A	28	8	0	0
fmo-4 KO DR	fmo-4 KO	DR	A	31	12	0	0
fmo-4 KO DR	fmo-4 KO	DR	A	33	6	0	0
fmo-4 KO DR	fmo-4 KO	DR	A	35	3	0	0
fmo-4 KO DR	fmo-4 KO	DR	A	38	1	0	0
fmo-4 OE fed	fmo-4 OE	fed	A	10	0	0	0
fmo-4 OE fed	fmo-4 OE	fed	A	12	0	0	0
fmo-4 OE fed	fmo-4 OE	fed	A	14	0	0	0
fmo-4 OE fed	fmo-4 OE	fed	A	17	0	0	0
fmo-4 OE fed	fmo-4 OE	fed	A	19	2	0	0
fmo-4 OE fed	fmo-4 OE	fed	A	21	1	0	0
fmo-4 OE fed	fmo-4 OE	fed	A	24	5	0	0
fmo-4 OE fed	fmo-4 OE	fed	A	26	5	0	0
fmo-4 OE fed	fmo-4 OE	fed	A	28	14	0	0
fmo-4 OE fed	fmo-4 OE	fed	A	31	8	0	0
fmo-4 OE fed	fmo-4 OE	fed	A	33	3	0	0
fmo-4 OE fed	fmo-4 OE	fed	A	35	3	0	0
fmo-4 OE fed	fmo-4 OE	fed	A	38	2	0	0
fmo-4 OE fed	fmo-4 OE	fed	B	10	0	0	0
fmo-4 OE fed	fmo-4 OE	fed	B	12	0	0	0
fmo-4 OE fed	fmo-4 OE	fed	B	14	0	0	0
fmo-4 OE fed	fmo-4 OE	fed	B	17	3	0	0
fmo-4 OE fed	fmo-4 OE	fed	B	19	5	0	0
fmo-4 OE fed	fmo-4 OE	fed	B	21	5	0	0
fmo-4 OE fed	fmo-4 OE	fed	B	24	10	0	0
fmo-4 OE fed	fmo-4 OE	fed	B	26	11	0	0
fmo-4 OE fed	fmo-4 OE	fed	B	28	9	0	0
fmo-4 OE fed	fmo-4 OE	fed	B	31	5	0	0
fmo-4 OE fed	fmo-4 OE	fed	B	33	4	0	0
fmo-4 OE fed	fmo-4 OE	fed	B	35	2	0	0
fmo-4 OE DR	fmo-4 OE	DR	A	10	0	0	0
fmo-4 OE DR	fmo-4 OE	DR	A	12	0	0	0
fmo-4 OE DR	fmo-4 OE	DR	A	14	2	0	0
fmo-4 OE DR	fmo-4 OE	DR	A	17	1	0	0
fmo-4 OE DR	fmo-4 OE	DR	A	19	0	0	0
fmo-4 OE DR	fmo-4 OE	DR	A	21	0	0	0
fmo-4 OE DR	fmo-4 OE	DR	A	24	3	0	0
fmo-4 OE DR	fmo-4 OE	DR	A	26	5	0	0
fmo-4 OE DR	fmo-4 OE	DR	A	28	4	0	0
fmo-4 OE DR	fmo-4 OE	DR	A	31	2	0	0
fmo-4 OE DR	fmo-4 OE	DR	A	33	8	0	0
fmo-4 OE DR	fmo-4 OE	DR	A	35	9	0	0
fmo-4 OE DR	fmo-4 OE	DR	A	38	7	0	0
fmo-4 OE DR	fmo-4 OE	DR	A	40	3	0	0
fmo-4 OE DR	fmo-4 OE	DR	A	42	2	0	0
fmo-4 OE DR	fmo-4 OE	DR	B	10	0	0	0
fmo-4 OE DR	fmo-4 OE	DR	B	12	0	0	0
fmo-4 OE DR	fmo-4 OE	DR	B	14	0	0	0
fmo-4 OE DR	fmo-4 OE	DR	B	17	0	0	0
fmo-4 OE DR	fmo-4 OE	DR	B	19	1	0	0
fmo-4 OE DR	fmo-4 OE	DR	B	21	1	0	0
fmo-4 OE DR	fmo-4 OE	DR	B	24	5	0	0
fmo-4 OE DR	fmo-4 OE	DR	B	26	3	0	0
fmo-4 OE DR	fmo-4 OE	DR	B	28	3	0	0
fmo-4 OE DR	fmo-4 OE	DR	B	31	8	0	0
fmo-4 OE DR	fmo-4 OE	DR	B	33	14	0	0
fmo-4 OE DR	fmo-4 OE	DR	B	35	8	0	0
fmo-4 OE DR	fmo-4 OE	DR	B	38	4	0	0
fmo-4 OE DR	fmo-4 OE	DR	B	40	4	0	0

## Sheet: stats
% WT fed [137]						condition	chi	pvalue	corrected_pvalue
#days	dead	censored				WT fed v.s. fmo-4 OE fed	84	0	0
10	0					WT fed v.s. fmo-4 KO fed	10.26	0.0014	0.0068
12	3					WT fed v.s. WT sDR	163.03	0	0
14	11					WT fed v.s. fmo-4OE sdr	162.57	0	0
17	21					WT fed v.s. fmo-4KO sdr	54.53	0	0
19	25					fmo-4 OE fed v.s. WT fed	84	0	0
21	30					fmo-4 OE fed v.s. fmo-4 KO fed	39.55	0	0
24	27					fmo-4 OE fed v.s. WT sDR	34.13	5.1e-09	2.6e-08
26	11					fmo-4 OE fed v.s. fmo-4OE sdr	46.49	0	0
28	6					fmo-4 OE fed v.s. fmo-4KO sdr	0.07	0.7952	1
31	3					fmo-4 KO fed v.s. WT fed	10.26	0.0014	0.0068
33						fmo-4 KO fed v.s. fmo-4 OE fed	39.55	0	0
35						fmo-4 KO fed v.s. WT sDR	104.19	0	0
38						fmo-4 KO fed v.s. fmo-4OE sdr	115.84	0	0
40						fmo-4 KO fed v.s. fmo-4KO sdr	27.73	1.4e-07	7e-07
42						WT sDR v.s. WT fed	163.03	0	0
						WT sDR v.s. fmo-4 OE fed	34.13	5.1e-09	2.6e-08
						WT sDR v.s. fmo-4 KO fed	104.19	0	0
						WT sDR v.s. fmo-4OE sdr	4.51	0.0336	0.1681
						WT sDR v.s. fmo-4KO sdr	21.96	2.8e-06	1.4e-05
						fmo-4OE sdr v.s. WT fed	162.57	0	0
% fmo-4 OE fed [97]						fmo-4OE sdr v.s. fmo-4 OE fed	46.49	0	0
#days	dead	censored				fmo-4OE sdr v.s. fmo-4 KO fed	115.84	0	0
10	0					fmo-4OE sdr v.s. WT sDR	4.51	0.0336	0.1681
12	0					fmo-4OE sdr v.s. fmo-4KO sdr	33.89	5.8e-09	2.9e-08
14	0					fmo-4KO sdr v.s. WT fed	54.53	0	0
17	3					fmo-4KO sdr v.s. fmo-4 OE fed	0.07	0.7952	1
19	7					fmo-4KO sdr v.s. fmo-4 KO fed	27.73	1.4e-07	7e-07
21	6					fmo-4KO sdr v.s. WT sDR	21.96	2.8e-06	1.4e-05
24	15					fmo-4KO sdr v.s. fmo-4OE sdr	33.89	5.8e-09	2.9e-08
26	16
28	23
31	13
33	7
35	5
38	2
40
42
% fmo-4 KO fed [80]
#days	dead	censored
10	0
12	1
14	0
17	3
19	10
21	28
24	15
26	12
28	8
31	3
33
35
38
40
42
% WT sDR [145]
#days	dead	censored
10	0
12	0
14	10
17	4
19	3
21	6
24	7
26	5
28	11
31	30
33	28
35	19
38	17
40	5
42
% fmo-4OE sdr [97]
#days	dead	censored
10	0
12	0
14	2
17	1
19	1
21	1
24	8
26	8
28	7
31	10
33	22
35	17
38	11
40	7
42	2
% fmo-4KO sdr [58]
#days	dead	censored
10	0
12	0
14	0
17	4
19	7
21	4
24	4
26	9
28	8
31	12
33	6
35	3
38	1
40
42
