# Supplementary material for: fmo-4 promotes longevity and stress resistance via ER to mitochondria calcium regulation in C. elegans
Source: eLife journal article supplement (doi:10.7554/elife.99971), 2024-08-27
Supplement: fig1-data1 [file elife-99971-fig1-data1-v1.zip]

## Sheet: Data
strain	day	alive	dead-total	dead-normal	dead-ruptured	censored	ratio-alive	percentage-alive
N2	0	84	0	0	0	0	1	100
N2	5	84	0	0	0	0	1	100
N2	7	84	0	0	0	0	1	100						1	2	3	4	5	6	7				sDR
N2	10	84	0	0	0	0	1	100			plot data here-->		day	Wild-Type Fed	FMO-2 OE	FMO-2 KO Fed	fmo-1	FMO-4 KO Fed	FMO-4 OE	fmo-2O;1K	fmo-2OE;4OE	FMO-2OE;4KO	fmo-2K;4K	Wild-Type DR	fmo-2 OE sDR	FMO-2 KO DR	fmo-1	FMO-4 KO DR	fmo-4 OE DR	fmo-2O;4O	fmo-2O;4K	fmo-2O;1K	fmo-2K;4K
N2	12	78	6	6	0	0	0.928571	92.8571				0	0	100	100	100	100	100	100	100	100	100	100	100	100	100	100	100	100	100	100	100	100
N2	14	73	11	5		0	0.869048	86.9048				5	5	100	100	100	100	100	100	100	100	100	100	100	100	100	100	100	100	100	100	100	100
N2	17	62	22	11		0	0.738095	73.8095				7	7	100	100	100	100	100	100	100	100	100	100	100	100	100	100	100	100	100	100	100	100
N2	19	49	35	13		0	0.583333	58.3333				10	10	100	100	100	100	100	100	100	100	100	100	100	100	100	100	100	100	100	100	100	100
N2	21	39	45	10		0	0.464286	46.4286				12	12	92.8571	100	88.8889	96.5116	94.6565	95.5056	94.5455	97.7941	92.6316	72.7273	92.3077	93.5484	95	89.8551	95	95.4955	95.6044	94.9367	94.1176	97.619
N2	24	27	57	12		0	0.321429	32.1429				14	14	86.9048	95.2381	77.7778	90.6977	88.5496	92.1348	85.4545	94.8529	85.2632	72.7273	89.7436	88.7097	86	84.058	85	90.991	94.5055	91.1392	88.2353	92.8571
N2	26	11	73	16		0	0.130952	13.0952				17	17	73.8095	85.7143	72.2222	79.0698	76.3359	86.5169	74.5455	91.1765	74.7368	63.6364	84.6154	87.0968	75	73.913	82	87.3874	92.3077	82.2785	83.8235	73.8095
N2	30	1	83	10		0	0.0119048	1.19048				19	19	58.3333	80.9524	61.1111	63.9535	63.3588	77.5281	61.8182	85.2941	64.2105	45.4545	76.9231	83.871	62	60.8696	75	82.8829	90.1099	56.962	76.4706	61.9048
N2	32	0	84	1	0	0	0	0				21	21	46.4286	71.4286	44.4444	50	50.3817	65.1685	50.9091	80.1471	48.4211	27.2727	69.2308	80.6452	52	57.971	57	78.3784	86.8132	43.038	72.0588	42.8571
N2	34	0	84		0	0	0	0				24	24	32.1429	61.9048	27.7778	34.8837	32.8244	56.1798	29.0909	70.5882	23.1579	0	64.1026	74.1935	36	55.0725	45	72.973	82.4176	22.7848	67.6471	7.14286
N2	37	0	84		0	0	0	0				26	26	13.0952	52.381	11.1111	17.4419	15.2672	41.573	9.09091	58.8235	6.31579		56.4103	66.129	20	39.1304	26	66.6667	78.022	8.86076	52.9412	2.38095
N2	39	0	84		0	0	0	0				28	28	1.19048	42.8571	0	4.65116	4.58015	22.4719	3.63636	49.2647	1.05263		43.5897	61.2903	5	33.3333	12	54.955	74.7253	2.53165	35.2941	2.38095
N2	41	0	84		0	0	0	0				31	31	0	33.3333		0	0	11.236	0	32.3529	1.05263		35.8974	50	1	10.1449	2.7027	44.1441	69.2308	0	11.7647	0
N2	44	0	84		0	0	0	0				33	33		9.52381				1.1236		11.7647	0		28.2051	45.1613	0	2.89855	0	29.7297	58.2418		1.47059
N2	46	0	84		0	0	0	0				35	35		0				0		5.14706			5.12821	19.3548		0		13.5135	31.8681		1.47059
												38	38								0			2.5641	8.06452				3.6036	15.3846		0
C9	0	21	0	0	0	0	1	100				40	40											0	0				0	4.3956
C9	5	21	0	0	0	0	1	100				42	42																	1.0989
C9	7	21	0	0	0	0	1	100				45	45																	0
C9	10	21	0	0	0	0	1	100
C9	12	21	0	0		0	1	100
C9	14	20	1	1		0	0.952381	95.2381
C9	17	18	3	2		0	0.857143	85.7143
C9	19	17	4	1		0	0.809524	80.9524
C9	21	15	6	2		0	0.714286	71.4286
C9	24	13	8	2		0	0.619048	61.9048
C9	26	11	10	2		0	0.52381	52.381
C9	28	9	12	2		0	0.428571	42.8571
C9	32	7	14	2		0	0.333333	33.3333
C9	34	2	19	5		0	0.0952381	9.52381
C9	37	0	21	2		0	0	0
C9	39	0	21			0	0	0
C9	41	0	21			0	0	0
C9	44	0	21			0	0	0
C9	46	0	21			0	0	0
fmo-2	0	18	0	0	0	0	1	100
fmo-2	5	18	0	0	0	0	1	100
fmo-2	7	18	0	0	0	0	1	100
fmo-2	10	18	0	0	0	0	1	100
fmo-2	12	16	2	2		0	0.888889	88.8889
fmo-2	14	14	4	2		0	0.777778	77.7778
fmo-2	17	13	5	1		0	0.722222	72.2222
fmo-2	19	11	7	2		0	0.611111	61.1111
fmo-2	21	8	10	3		0	0.444444	44.4444
fmo-2	24	5	13	3		0	0.277778	27.7778
fmo-2	26	2	16	3		0	0.111111	11.1111
fmo-2	28	0	18	2		0	0	0
fmo-2	32	0	18			0	0	0
fmo-2	34	0	18		0	0	0	0
fmo-2	37	0	18		0	0	0	0
fmo-2	39	0	18		0	0	0	0
fmo-2	41	0	18		0	0	0	0
fmo-2	44	0	18		0	0	0	0
fmo-2	46	0	18		0	0	0	0
1KO	0	86	0	0	0	0	1	100
1KO	5	86	0	0	0	0	1	100
1KO	7	86	0	0	0	0	1	100
1KO	10	86	0	0	0	0	1	100
1KO	12	83	3	3	0	0	0.965116	96.5116
1KO	14	78	8	5	0	0	0.906977	90.6977
1KO	17	68	18	10	0	0	0.790698	79.0698
1KO	19	55	31	13	0	0	0.639535	63.9535
1KO	21	43	43	12	0	0	0.5	50
1KO	24	30	56	13	0	0	0.348837	34.8837
1KO	26	15	71	15	0	0	0.174419	17.4419
1KO	28	4	82	11	0	0	0.0465116	4.65116
1KO	32	0	86	4	0	0	0	0
1KO	34	0	86		0	0	0	0
1KO	37	0	86		0	0	0	0
1KO	39	0	86		0	0	0	0
1KO	41	0	86		0	0	0	0
1KO	44	0	86		0	0	0	0
1KO	46	0	86		0	0	0	0
4KO	0	131	0	0	0	0	1	100
4KO	5	131	0	0	0	0	1	100
4KO	7	131	0	0	0	0	1	100
4KO	10	131	0	0	0	0	1	100
4KO	12	124	7	7	0	0	0.946565	94.6565
4KO	14	116	15	8	0	0	0.885496	88.5496
4KO	17	100	31	16	0	0	0.763359	76.3359
4KO	19	83	48	17		0	0.633588	63.3588
4KO	21	66	65	17	0	0	0.503817	50.3817
4KO	24	43	88	23	0	0	0.328244	32.8244
4KO	26	20	111	23	0	0	0.152672	15.2672
4KO	28	6	125	14	0	0	0.0458015	4.58015
4KO	32	0	131	6	0	0	0	0
4KO	34	0	131		0	0	0	0
4KO	37	0	131		0	0	0	0
4KO	39	0	131		0	0	0	0
4KO	41	0	131		0	0	0	0
4KO	44	0	131		0	0	0	0
4KO	46	0	131	0	0	0	0	0
4OE	0	89	0	0	0	0	1	100
4OE	5	89	0	0	0	0	1	100
4OE	7	89	0	0	0	0	1	100
4OE	10	89	0	0	0	0	1	100							fmo1 is not required for sDR
4OE	12	85	4	4	0	0	0.955056	95.5056							fmo1 is downstream of fmo2 under fed conditions
4OE	14	82	7	3		0	0.921348	92.1348							could the sdr be a substrate epistasis? So takes on the 2OE phenotype?
4OE	17	77	12	5	0	0	0.865169	86.5169
4OE	19	69	20	8		0	0.775281	77.5281
4OE	21	58	31	11	0	0	0.651685	65.1685
4OE	24	50	39	8	0	0	0.561798	56.1798
4OE	26	37	52	13	0	0	0.41573	41.573
4OE	28	20	69	17	0	0	0.224719	22.4719
4OE	32	10	79	10	0	0	0.11236	11.236
4OE	34	1	88	9	0	0	0.011236	1.1236
4OE	37	0	89	1	0	0	0	0
4OE	39	0	89		0	0	0	0
4OE	41	0	89		0	0	0	0
4OE	44	0	89		0	0	0	0
4OE	46	0	89		0	0	0	0
2O;1KO	0	55	0	0	0	0	1	100
2O;1KO	5	55	0	0	0	0	1	100
2O;1KO	7	55	0	0	0	0	1	100
2O;1KO	10	55	0	0	0	0	1	100
2O;1KO	12	52	3	3		0	0.945455	94.5455
2O;1KO	14	47	8	5		0	0.854545	85.4545
2O;1KO	17	41	14	6		0	0.745455	74.5455
2O;1KO	19	34	21	7	0	0	0.618182	61.8182
2O;1KO	21	28	27	6	0	0	0.509091	50.9091
2O;1KO	24	16	39	12	0	0	0.290909	29.0909
2O;1KO	26	5	50	11	0	0	0.0909091	9.09091
2O;1KO	28	2	53	3	0	0	0.0363636	3.63636
2O;1KO	32	0	55	2	0	0	0	0
2O;1KO	34	0	55		0	0	0	0
2O;1KO	37	0	55		0	0	0	0
2O;1KO	39	0	55		0	0	0	0
2O;1KO	41	0	55		0	0	0	0
2O;1KO	44	0	55		0	0	0	0
2O;1KO	46	0	55		0	0	0	0
2O;4O	0	136	0	0	0	0	1	100
2O;4O	5	136	0	0	0	0	1	100																																			fmo4 is downstream of fmo2, and fmo4 is required for sDR.
2O;4O	7	136	0	0	0	0	1	100
2O;4O	10	136	0	0	0	0	1	100
2O;4O	12	133	3	3		0	0.977941	97.7941																								sdr is additive with 2o;4o
2O;4O	14	129	7	4		0	0.948529	94.8529
2O;4O	17	124	12	5	0	0	0.911765	91.1765
2O;4O	19	116	20	8	0	0	0.852941	85.2941
2O;4O	21	109	27	7	0	0	0.801471	80.1471
2O;4O	24	96	40	13	0	0	0.705882	70.5882
2O;4O	26	80	56	16	0	0	0.588235	58.8235
2O;4O	28	67	69	13	0	0	0.492647	49.2647
2O;4O	32	44	92	23	0	0	0.323529	32.3529
2O;4O	34	16	120	28	0	0	0.117647	11.7647
2O;4O	37	7	129	9	0	0	0.0514706	5.14706
2O;4O	39	0	136	7	0	0	0	0
2O;4O	41	0	136	0	0	0	0	0
2O;4O	44	0	136	0	0	0	0	0
	46
2O;4KO	0	95	0	0	0	0	1	100
2O;4KO	5	95	0	0	0	0	1	100
2O;4KO	7	95	0	0	0	0	1	100
2O;4KO	10	95	0	0	0	0	1	100
2O;4KO	12	88	7	7		0	0.926316	92.6316
2O;4KO	14	81	14	7		0	0.852632	85.2632
2O;4KO	17	71	24	10		0	0.747368	74.7368
2O;4KO	19	61	34	10		0	0.642105	64.2105
2O;4KO	21	46	49	15		0	0.484211	48.4211
2O;4KO	24	22	73	24		0	0.231579	23.1579
2O;4KO	26	6	89	16		0	0.0631579	6.31579
2O;4KO	28	1	94	5	0	0	0.0105263	1.05263
2O;4KO	32	1	94	0	0	0	0.0105263	1.05263
2O;4KO	34	0	95	1	0	0	0	0
2O;4KO	37	0	95		0	0	0	0
2O;4KO	39	0	95		0	0	0	0
2O;4KO	41	0	95		0	0	0	0
2O;4KO	44	0	95		0	0	0	0
2O;4KO	46	0	95		0		0	0
2O;4KO	47	0	95		0		0	0
2K;4K	0	11	0	0	0	0	1	100
2K;4K	5	11	0	0	0	0	1	100
2K;4K	7	11	0	0	0	0	1	100
2K;4K	10	11	0	0	0	0	1	100
2K;4K	12	8	3	3	0	0	0.727273	72.7273
2K;4K	14	8	3	0	0	0	0.727273	72.7273
2K;4K	17	7	4	1	0	0	0.636364	63.6364
2K;4K	19	5	6	2		0	0.454545	45.4545
2K;4K	21	3	8	2		0	0.272727	27.2727
2K;4K	24	0	11	3		0	0	0
2K;4K	26	0	11			0	0	0
2K;4K	29	0	11			0	0	0
2K;4K	31	0	11			0	0	0
2K;4K	33	0	11			0	0	0
2K;4K	35	0	11			0	0	0
2K;4K	38	0	11			0	0	0
2K;4K	40	0	11			0	0	0
2K;4K		0	11		0	0	0	0
							0
14	14	0	0	0	0	0	#DIV/0!	#DIV/0!
14	17	0	0	0	0	0	#DIV/0!	#DIV/0!
14	19	-1	1	1	0	0	#DIV/0!	#DIV/0!
14	21	-5	5	2	2	0	#DIV/0!	#DIV/0!
14	24	-19	19	12	2	0	#DIV/0!	#DIV/0!
14	26	-31	31	11	1	0	#DIV/0!	#DIV/0!
14	29	-82	82	50	1	0	#DIV/0!	#DIV/0!
14	31	-92	92	10	0	0	#DIV/0!	#DIV/0!
14	33	-97	97	5	0	0	#DIV/0!	#DIV/0!
14	35	-97	97	0	0	0	#DIV/0!	#DIV/0!
14	38	-97	97	0	0	0	#DIV/0!	#DIV/0!
14	40	-97	97	0	0	0	#DIV/0!	#DIV/0!
14		-97	97	0	0	0	#DIV/0!	#DIV/0!
15L	0	156	0	0	0	0	1	100
15	5	156	0	0	0	0	1	100
15	7	156	0	0	0	0	1	100
15	10	156	0	0	0	0	1	100
15	12	153	3	3	0	0	0.980769	98.0769
15	14	153	3	0	0	0	0.980769	98.0769
15	17	151	5	2	0	0	0.967949	96.7949
15	19	151	5	0	0	0	0.967949	96.7949
15	21	143	13	4	4	0	0.916667	91.6667
15	24	120	36	18	5	0	0.769231	76.9231
15	26	99	57	18	3	0	0.634615	63.4615
15	29	18	138	81	0	0	0.115385	11.5385
15	31	4	152	14	0	0	0.025641	2.5641
15	33	0	156	4	0	0	0	0
15	35	0	156	0	0	0	0	0
15	38	0	156	0	0	0	0	0
15	40	0	156	0	0	0	0	0
15		0	156	0	0	0	0	0
16	0	156	0	0	0	0	1	100
16	5	156	0	0	0	0	1	100
16	7	156	0	0	0	0	1	100
16	10	156	0	0	0	0	1	100
16	12	154	2	2	0	0	0.987179	98.7179
16	14	154	2	0	0	0	0.987179	98.7179
16	17	154	2	0	0	0	0.987179	98.7179
16	19	148	8	4	2	0	0.948718	94.8718
16	21	136	20	4	8	0	0.871795	87.1795
16	24	98	58	10	28	0	0.628205	62.8205
16	26	79	77	11	8	0	0.50641	50.641
16	29	27	129	52	0	0	0.173077	17.3077
16	31	18	138	9	0	0	0.115385	11.5385
16	33	7	149	11	0	0	0.0448718	4.48718
16	35	2	154	5	0	0	0.0128205	1.28205
16	38	1	155	1	0	0	0.00641026	0.641026
16	40	1	155	0	0	0	0.00641026	0.641026
16	42	0	156	1	0	0	0	0
17	0	134	0	0	0	0	1	100
17	5	134	0	0	0	0	1	100
17	7	134	0	0	0	0	1	100
17	10	134	0	0	0	0	1	100
17	12	132	2	2	0	0	0.985075	98.5075
17	14	132	2	0	0	0	0.985075	98.5075
17	17	132	2	0	0	0	0.985075	98.5075
17	19	124	10	4	4	0	0.925373	92.5373
17	21	109	25	5	10	0	0.813433	81.3433
17	24	90	44	10	9	0	0.671642	67.1642
17	26	70	64	15	5	0	0.522388	52.2388
17	29	34	100	36	0	0	0.253731	25.3731
17	31	23	111	11	0	0	0.171642	17.1642
17	33	3	131	20	0	0	0.0223881	2.23881
17	35	1	133	2	0	0	0.00746269	0.746269
17	38	1	133	0	0	0	0.00746269	0.746269
17	40	0	134	1	0	0	0	0
17		0	134	0	0	0	0	0
18	0	233	0	0	0	0	1	100
18	5	233	0	0	0	0	1	100
18	7	233	0	0	0	0	1	100
18	10	233	0	0	0	0	1	100
18	12	233	0	0	0	0	1	100
18	14	232	1	1	0	0	0.995708	99.5708
18	17	221	12	10	1	0	0.948498	94.8498
18	19	219	14	1	1	0	0.939914	93.9914
18	21	212	21	3	4	0	0.909871	90.9871
18	24	180	53	24	8	0	0.772532	77.2532
18	26	136	97	39	5	0	0.583691	58.3691
18	29	72	161	62	2	0	0.309013	30.9013
18	31	59	174	13	0	0	0.253219	25.3219
18	33	36	197	23	0	0	0.154506	15.4506
18	35	27	206	9	0	0	0.11588	11.588
18	38	15	218	12	0	0	0.0643777	6.43777
18	40	7	226	8	0	0	0.0300429	3.00429
18	42	7	226	0	0	0	0.0300429	3.00429
18	45	0	233	7	0	0	0	0
19	0	142	0	0	0	0	1	100
19	5	142	0	0	0	0	1	100
19	7	142	0	0	0	0	1	100
19	10	142	0	0	0	0	1	100
19	12	140	2	2	0	0	0.985915	98.5915
19	14	137	5	2	1	0	0.964789	96.4789
19	17	128	14	7	2	0	0.901408	90.1408
19	19	121	21	0	7	0	0.852113	85.2113
19	21	115	27	3	3	0	0.809859	80.9859
19	24	81	61	21	13	0	0.570423	57.0423
19	26	48	94	26	7	0	0.338028	33.8028
19	29	21	121	27	0	0	0.147887	14.7887
19	31	11	131	10	0	0	0.0774648	7.74648
19	33	2	140	9	0	0	0.0140845	1.40845
19	35	1	141	1	0	0	0.00704225	0.704225
19	38	0	142	1	0	0	0	0
19	40	0	142	0	0	0	0	0
19		0	142	0	0	0	0	0
20	0	227	0	0	0	0	1	100
20	5	227	0	0	0	0	1	100
20	7	227	0	0	0	0	1	100
20	10	227	0	0	0	0	1	100
20	12	224	3	3	0	0	0.986784	98.6784
20	14	224	3	0	0	0	0.986784	98.6784
20	17	214	13	8	2	0	0.942731	94.2731
20	19	202	25	5	7	0	0.889868	88.9868
20	21	180	47	10	12	0	0.792952	79.2952
20	24	116	111	31	33	0	0.511013	51.1013
20	26	86	141	26	4	0	0.378855	37.8855
20	29	21	206	59	6	0	0.092511	9.2511
20	31	7	220	14	0	0	0.030837	3.0837
20	33	1	226	6	0	0	0.00440529	0.440529
20	35	0	227	1	0	0	0	0
20	38	0	227	0	0	0	0	0
20	40	0	227	0	0	0	0	0
20		0	227	0	0	0	0	0
21	0	154	0	0	0	0	1	100
21	5	154	0	0	0	0	1	100
21	7	154	0	0	0	0	1	100
21	10	154	0	0	0	0	1	100
21	12	154	0	0	0	0	1	100
21	14	154	0	0	0	0	1	100
21	17	154	0	0	0	0	1	100
21	19	146	8	7	1	0	0.948052	94.8052
21	21	127	27	4	15	0	0.824675	82.4675
21	24	106	48	17	4	0	0.688312	68.8312
21	26	68	86	31	7	0	0.441558	44.1558
21	29	38	116	29	1	0	0.246753	24.6753
21	31	29	125	9	0	0	0.188312	18.8312
21	33	11	143	18	0	0	0.0714286	7.14286
21	35	5	149	6	0	0	0.0324675	3.24675
21	38	0	154	5	0	0	0	0
21	40	0	154	0	0	0	0	0
21		0	154	0	0	0	0	0

## Sheet: stats
% WT [84]					condition	chi	pvalue	corrected_pvalue
#days	dead	censored			WT v.s. fmo-2 OE	18.56	1.6e-05	0.0001
0	0				WT v.s. fmo-4 OE	22.77	1.8e-06	9.1e-06
5	0				WT v.s. fmo-4 KO	0.59	0.4436	1
7	0				WT v.s. fmo-2O;4O	72.59	0	0
10	0				WT v.s. fmo-2O;4K	0.53	0.4653	1
12	6				fmo-2 OE v.s. WT	18.56	1.6e-05	0.0001
14	5				fmo-2 OE v.s. fmo-4 OE	4.02	0.045	0.225
17	11				fmo-2 OE v.s. fmo-4 KO	19.87	8.3e-06	4.1e-05
19	13				fmo-2 OE v.s. fmo-2O;4O	0.42	0.5177	1
21	10				fmo-2 OE v.s. fmo-2O;4K	20.14	7.2e-06	3.6e-05
24	12				fmo-4 OE v.s. WT	22.77	1.8e-06	9.1e-06
26	16				fmo-4 OE v.s. fmo-2 OE	4.02	0.045	0.225
28	10				fmo-4 OE v.s. fmo-4 KO	22.28	2.4e-06	1.2e-05
31	1				fmo-4 OE v.s. fmo-2O;4O	19.07	1.3e-05	0.0001
33					fmo-4 OE v.s. fmo-2O;4K	28.47	9.5e-08	4.8e-07
35					fmo-4 KO v.s. WT	0.59	0.4436	1
38					fmo-4 KO v.s. fmo-2 OE	19.87	8.3e-06	4.1e-05
40					fmo-4 KO v.s. fmo-4 OE	22.28	2.4e-06	1.2e-05
					fmo-4 KO v.s. fmo-2O;4O	81.67	0	0
					fmo-4 KO v.s. fmo-2O;4K	2.15	0.1423	0.7116
					fmo-2O;4O v.s. WT	72.59	0	0
% fmo-2 OE [21]					fmo-2O;4O v.s. fmo-2 OE	0.42	0.5177	1
#days	dead	censored			fmo-2O;4O v.s. fmo-4 OE	19.07	1.3e-05	0.0001
0	0				fmo-2O;4O v.s. fmo-4 KO	81.67	0	0
5	0				fmo-2O;4O v.s. fmo-2O;4K	82.58	0	0
7	0				fmo-2O;4K v.s. WT	0.53	0.4653	1
10	0				fmo-2O;4K v.s. fmo-2 OE	20.14	7.2e-06	3.6e-05
12	0				fmo-2O;4K v.s. fmo-4 OE	28.47	9.5e-08	4.8e-07
14	1				fmo-2O;4K v.s. fmo-4 KO	2.15	0.1423	0.7116
17	2				fmo-2O;4K v.s. fmo-2O;4O	82.58	0	0
19	1
21	2
24	2
26	2
28	2
31	2
33	5
35	2
38
40
% fmo-4 OE [89]
#days	dead	censored
0	0
5	0
7	0
10	0
12	4
14	3
17	5
19	8
21	11
24	8
26	13
28	17
31	10
33	9
35	1
38
40
% fmo-4 KO [131]
#days	dead	censored
0	0
5	0
7	0
10	0
12	7
14	8
17	16
19	17
21	17
24	23
26	23
28	14
31	6
33
35
38
40
% fmo-2O;4O [136]
#days	dead	censored
0	0
5	0
7	0
10	0
12	3
14	4
17	5
19	8
21	7
24	13
26	16
28	13
31	23
33	28
35	9
38	7
40
% fmo-2O;4K [95]
#days	dead	censored
0	0
5	0
7	0
10	0
12	7
14	7
17	10
19	10
21	15
24	24
26	16
28	5
31	0
33	1
35
38
40

## Sheet: Sheet2
condition	chi	pvalue	corrected_pvalue
WT v.s. fmo-2 OE	18.56	1.6e-05	0.0001
WT v.s. fmo-4 OE	22.77	1.8e-06	9.1e-06
WT v.s. fmo-4 KO	0.59	0.4436	1
WT v.s. fmo-2O;4O	72.59	0	0
WT v.s. fmo-2O;4K	0.53	0.4653	1
fmo-2 OE v.s. WT	18.56	1.6e-05	0.0001
fmo-2 OE v.s. fmo-4 OE	4.02	0.045	0.225
fmo-2 OE v.s. fmo-4 KO	19.87	8.3e-06	4.1e-05
fmo-2 OE v.s. fmo-2O;4O	0.42	0.5177	1
fmo-2 OE v.s. fmo-2O;4K	20.14	7.2e-06	3.6e-05
fmo-4 OE v.s. WT	22.77	1.8e-06	9.1e-06
fmo-4 OE v.s. fmo-2 OE	4.02	0.045	0.225
fmo-4 OE v.s. fmo-4 KO	22.28	2.4e-06	1.2e-05
fmo-4 OE v.s. fmo-2O;4O	19.07	1.3e-05	0.0001
fmo-4 OE v.s. fmo-2O;4K	28.47	9.5e-08	4.8e-07
fmo-4 KO v.s. WT	0.59	0.4436	1
fmo-4 KO v.s. fmo-2 OE	19.87	8.3e-06	4.1e-05
fmo-4 KO v.s. fmo-4 OE	22.28	2.4e-06	1.2e-05
fmo-4 KO v.s. fmo-2O;4O	81.67	0	0
fmo-4 KO v.s. fmo-2O;4K	2.15	0.1423	0.7116
fmo-2O;4O v.s. WT	72.59	0	0
fmo-2O;4O v.s. fmo-2 OE	0.42	0.5177	1
fmo-2O;4O v.s. fmo-4 OE	19.07	1.3e-05	0.0001
fmo-2O;4O v.s. fmo-4 KO	81.67	0	0
fmo-2O;4O v.s. fmo-2O;4K	82.58	0	0
fmo-2O;4K v.s. WT	0.53	0.4653	1
fmo-2O;4K v.s. fmo-2 OE	20.14	7.2e-06	3.6e-05
fmo-2O;4K v.s. fmo-4 OE	28.47	9.5e-08	4.8e-07
fmo-2O;4K v.s. fmo-4 KO	2.15	0.1423	0.7116
fmo-2O;4K v.s. fmo-2O;4O	82.58	0	0

## Sheet: sDR
strain	day	alive	dead-total	dead-normal	dead-ruptured	censored	ratio-alive	percentage-alive
N2	0	39	0	0	0	0	1	100
N2	5	39	0	0	0	0	1	100
N2	7	39	0	0	0	0	1	100						1	2	3	4	5	6	7
N2	10	39	0	0	0	0	1	100			plot data here-->		day	WT	fmo-2 OE	fmo-2	fmo-1	fmo-4	fmo-4 OE	fmo-2O;4O	fmo-2O;4K	fmo-2O;1K	fmo-2K;4K
N2	12	36	3	3	0	0	0.923077	92.3077				0	0	100	100	100	100	100	100	100	100	100	100
N2	14	35	4	1		0	0.897436	89.7436				5	5	100	100	100	100	100	100	100	100	100	100
N2	17	33	6	2		0	0.846154	84.6154				7	7	100	100	100	100	100	100	100	100	100	100
N2	19	30	9	3		0	0.769231	76.9231				10	10	100	100	100	100	100	100	100	100	100	100
N2	21	27	12	3		0	0.692308	69.2308				12	12	92.3077	93.5484	85	89.8551	97.2973	95.4955	95.6044	94.9367	94.1176	97.619
N2	24	25	14	2		0	0.641026	64.1026				14	14	89.7436	88.7097	80	84.058	93.6937	90.991	94.5055	91.1392	88.2353	92.8571
N2	26	22	17	3		0	0.564103	56.4103				17	17	84.6154	87.0968	80	73.913	88.2883	87.3874	92.3077	82.2785	83.8235	73.8095
N2	30	17	22	5		0	0.435897	43.5897				19	19	76.9231	83.871	75	60.8696	81.0811	82.8829	90.1099	56.962	76.4706	61.9048
N2	32	14	25	3	0	0	0.358974	35.8974				21	21	69.2308	80.6452	60	57.971	72.973	78.3784	86.8132	43.038	72.0588	42.8571
N2	34	11	28	3	0	0	0.282051	28.2051				24	24	64.1026	74.1935	45	55.0725	52.2523	72.973	82.4176	22.7848	67.6471	7.14286
N2	37	2	37	9	0	0	0.0512821	5.12821				26	26	56.4103	66.129	15	39.1304	29.7297	66.6667	78.022	8.86076	52.9412	2.38095
N2	39	1	38	1	0	0	0.025641	2.5641				28	28	43.5897	61.2903	10	33.3333	12.6126	54.955	74.7253	2.53165	35.2941	2.38095
N2	41	0	39	1	0	0	0	0				31	31	35.8974	50	5	10.1449	2.7027	44.1441	69.2308	0	11.7647	0
N2	44	0	39		0	0	0	0				33	33	28.2051	45.1613	0	2.89855	0	29.7297	58.2418		1.47059
N2	46	0	39		0	0	0	0				35	35	5.12821	19.3548		0		13.5135	31.8681		1.47059
												38	38	2.5641	8.06452				3.6036	15.3846		0
C9	0	62	0	0	0	0	1	100				40	40	0	0				0	4.3956
C9	5	62	0	0	0	0	1	100				42	42							1.0989
C9	7	62	0	0	0	0	1	100				45	45							0
C9	10	62	0	0	0	0	1	100
C9	12	58	4	4		0	0.935484	93.5484
C9	14	55	7	3		0	0.887097	88.7097
C9	17	54	8	1		0	0.870968	87.0968
C9	19	52	10	2		0	0.83871	83.871
C9	21	50	12	2		0	0.806452	80.6452
C9	24	46	16	4		0	0.741935	74.1935
C9	26	41	21	5		0	0.66129	66.129
C9	28	38	24	3		0	0.612903	61.2903
C9	32	31	31	7		0	0.5	50
C9	34	28	34	3		0	0.451613	45.1613
C9	37	12	50	16		0	0.193548	19.3548
C9	39	5	57	7		0	0.0806452	8.06452
C9	41	0	62	5		0	0	0
C9	44	0	62			0	0	0
C9	46	0	62			0	0	0
fmo-2	0	20	0	0	0	0	1	100
fmo-2	5	20	0	0	0	0	1	100
fmo-2	7	20	0	0	0	0	1	100
fmo-2	10	20	0	0	0	0	1	100
fmo-2	12	17	3	3		0	0.85	85
fmo-2	14	16	4	1		0	0.8	80
fmo-2	17	16	4	0		0	0.8	80
fmo-2	19	15	5	1		0	0.75	75
fmo-2	21	12	8	3		0	0.6	60
fmo-2	24	9	11	3		0	0.45	45
fmo-2	26	3	17	6		0	0.15	15
fmo-2	28	2	18	1		0	0.1	10
fmo-2	32	1	19	1		0	0.05	5
fmo-2	34	0	20	1	0	0	0	0
fmo-2	37	0	20		0	0	0	0
fmo-2	39	0	20		0	0	0	0
fmo-2	41	0	20		0	0	0	0
fmo-2	44	0	20		0	0	0	0
fmo-2	46	0	20		0	0	0	0
1KO	0	69	0	0	0	0	1	100
1KO	5	69	0	0	0	0	1	100
1KO	7	69	0	0	0	0	1	100
1KO	10	69	0	0	0	0	1	100
1KO	12	62	7	7	0	0	0.898551	89.8551
1KO	14	58	11	4	0	0	0.84058	84.058
1KO	17	51	18	7	0	0	0.73913	73.913
1KO	19	42	27	9	0	0	0.608696	60.8696
1KO	21	40	29	2	0	0	0.57971	57.971
1KO	24	38	31	2	0	0	0.550725	55.0725
1KO	26	27	42	11	0	0	0.391304	39.1304
1KO	28	23	46	4	0	0	0.333333	33.3333
1KO	32	7	62	16	0	0	0.101449	10.1449
1KO	34	2	67	5	0	0	0.0289855	2.89855
1KO	37	0	69	2	0	0	0	0
1KO	39	0	69		0	0	0	0
1KO	41	0	69		0	0	0	0
1KO	44	0	69		0	0	0	0
1KO	46	0	69		0	0	0	0
4KO	0	111	0	0	0	0	1	100
4KO	5	111	0	0	0	0	1	100
4KO	7	111	0	0	0	0	1	100
4KO	10	111	0	0	0	0	1	100
4KO	12	108	3	3	0	0	0.972973	97.2973
4KO	14	104	7	4	0	0	0.936937	93.6937
4KO	17	98	13	6	0	0	0.882883	88.2883
4KO	19	90	21	8		0	0.810811	81.0811
4KO	21	81	30	9	0	0	0.72973	72.973
4KO	24	58	53	23	0	0	0.522523	52.2523
4KO	26	33	78	25	0	0	0.297297	29.7297
4KO	28	14	97	19	0	0	0.126126	12.6126
4KO	32	3	108	11	0	0	0.027027	2.7027
4KO	34	0	111	3	0	0	0	0
4KO	37	0	111		0	0	0	0
4KO	39	0	111		0	0	0	0
4KO	41	0	111	0	0	0	0	0
4KO	44	0	111	0	0	0	0	0
4KO	46	0	111	0	0	0	0	0
4OE	0	111	0	0	0	0	1	100
4OE	5	111	0	0	0	0	1	100
4OE	7	111	0	0	0	0	1	100
4OE	10	111	0	0	0	0	1	100
4OE	12	106	5	5	0	0	0.954955	95.4955
4OE	14	101	10	5		0	0.90991	90.991
4OE	17	97	14	4	0	0	0.873874	87.3874
4OE	19	92	19	5		0	0.828829	82.8829
4OE	21	87	24	5	0	0	0.783784	78.3784
4OE	24	81	30	6	0	0	0.72973	72.973
4OE	26	74	37	7	0	0	0.666667	66.6667
4OE	28	61	50	13	0	0	0.54955	54.955
4OE	32	49	62	12	0	0	0.441441	44.1441
4OE	34	33	78	16	0	0	0.297297	29.7297
4OE	37	15	96	18	0	0	0.135135	13.5135
4OE	39	4	107	11	0	0	0.036036	3.6036
4OE	41	0	111	4	0	0	0	0
4OE	44	0	111		0	0	0	0
4OE	46	0	111		0	0	0	0
2O;4O	0	91	0	0	0	0	1	100
2O;4O	5	91	0	0	0	0	1	100
2O;4O	7	91	0	0	0	0	1	100
2O;4O	10	91	0	0	0	0	1	100
2O;4O	12	87	4	4		0	0.956044	95.6044
2O;4O	14	86	5	1		0	0.945055	94.5055
2O;4O	17	84	7	2		0	0.923077	92.3077
2O;4O	19	82	9	2	0	0	0.901099	90.1099
2O;4O	21	79	12	3	0	0	0.868132	86.8132
2O;4O	24	75	16	4	0	0	0.824176	82.4176
2O;4O	26	71	20	4	0	0	0.78022	78.022
2O;4O	28	68	23	3	0	0	0.747253	74.7253
2O;4O	32	63	28	5	0	0	0.692308	69.2308
2O;4O	34	53	38	10	0	0	0.582418	58.2418
2O;4O	37	29	62	24	0	0	0.318681	31.8681
2O;4O	39	14	77	15	0	0	0.153846	15.3846
2O;4O	41	4	87	10	0	0	0.043956	4.3956
2O;4O	44	1	90	3	0	0	0.010989	1.0989
2O;4O	46	0	91	1	0	0	0	0
2O;4KO	0	79	0	0	0	0	1	100
2O;4KO	5	79	0	0	0	0	1	100
2O;4KO	7	79	0	0	0	0	1	100
2O;4KO	10	79	0	0	0	0	1	100
2O;4KO	12	75	4	4		0	0.949367	94.9367
2O;4KO	14	72	7	3		0	0.911392	91.1392
2O;4KO	17	65	14	7	0	0	0.822785	82.2785
2O;4KO	19	45	34	20	0	0	0.56962	56.962
2O;4KO	21	34	45	11	0	0	0.43038	43.038
2O;4KO	24	18	61	16	0	0	0.227848	22.7848
2O;4KO	26	7	72	11	0	0	0.0886076	8.86076
2O;4KO	28	2	77	5	0	0	0.0253165	2.53165
2O;4KO	32	0	79	2	0	0	0	0
2O;4KO	34	0	79		0	0	0	0
2O;4KO	37	0	79		0	0	0	0
2O;4KO	39	0	79	0	0	0	0	0
2O;4KO	41	0	79	0	0	0	0	0
2O;4KO	44	0	79	0	0	0	0	0
	46
2O;1KO	0	68	0	0	0	0	1	100
2O;1KO	5	68	0	0	0	0	1	100
2O;1KO	7	68	0	0	0	0	1	100
2O;1KO	10	68	0	0	0	0	1	100
2O;1KO	12	64	4	4		0	0.941176	94.1176
2O;1KO	14	60	8	4		0	0.882353	88.2353
2O;1KO	17	57	11	3		0	0.838235	83.8235
2O;1KO	19	52	16	5		0	0.764706	76.4706
2O;1KO	21	49	19	3		0	0.720588	72.0588
2O;1KO	24	46	22	3		0	0.676471	67.6471
2O;1KO	26	36	32	10		0	0.529412	52.9412
2O;1KO	28	24	44	12	0	0	0.352941	35.2941
2O;1KO	32	8	60	16	0	0	0.117647	11.7647
2O;1KO	34	1	67	7	0	0	0.0147059	1.47059
2O;1KO	37	1	67	0	0	0	0.0147059	1.47059
2O;1KO	39	0	68	1	0	0	0	0
2O;1KO	41	0	68		0	0	0	0
2O;1KO	44	0	68		0	0	0	0
2O;1KO	46	0	68		0		0	0
2O;1KO	47	0	68		0		0	0
2K;4K	0	42	0	0	0	0	1	100
2K;4K	5	42	0	0	0	0	1	100
2K;4K	7	42	0	0	0	0	1	100
2K;4K	10	42	0	0	0	0	1	100
2K;4K	12	41	1	1	0	0	0.97619	97.619
2K;4K	14	39	3	2	0	0	0.928571	92.8571
2K;4K	17	31	11	8	0	0	0.738095	73.8095
2K;4K	19	26	16	5		0	0.619048	61.9048
2K;4K	21	18	24	8		0	0.428571	42.8571
2K;4K	24	3	39	15		0	0.0714286	7.14286
2K;4K	26	1	41	2		0	0.0238095	2.38095
2K;4K	29	1	41	0		0	0.0238095	2.38095
2K;4K	31	0	42	1		0	0	0
2K;4K	33	0	42			0	0	0
2K;4K	35	0	42			0	0	0
2K;4K	38	0	42			0	0	0
2K;4K	40	0	42			0	0	0
2K;4K		0	42			0	0	0
14
14
14
14
14
14
14
14
14
14
14
14
14
15L
15
15
15
15
15
15
15
15
15
15
15
15
15
15
15
15
15
16
16
16
16
16
16
16
16
16
16
16
16
16
16
16
16
16
16
17
17
17
17
17
17
17
17
17
17
17
17
17
17
17
17
17
17
18
18
18
18
18
18
18
18
18
18
18
18
18
18
18
18
18
18
18
19
19
19
19
19
19
19
19
19
19
19
19
19
19
19
19
19
19
20
20
20
20
20
20
20
20
20
20
20
20
20
20
20
20
20
20
21
21	5	0	0	0	0	0	#DIV/0!	#DIV/0!
21	7	0	0	0	0	0	#DIV/0!	#DIV/0!
21	10	0	0	0	0	0	#DIV/0!	#DIV/0!
21	12	0	0	0	0	0	#DIV/0!	#DIV/0!
21	14	0	0	0	0	0	#DIV/0!	#DIV/0!
21	17	0	0	0	0	0	#DIV/0!	#DIV/0!
21	19	-8	8	7	1	0	#DIV/0!	#DIV/0!
21	21	-27	27	4	15	0	#DIV/0!	#DIV/0!
21	24	-48	48	17	4	0	#DIV/0!	#DIV/0!
21	26	-86	86	31	7	0	#DIV/0!	#DIV/0!
21	29	-116	116	29	1	0	#DIV/0!	#DIV/0!
21	31	-125	125	9	0	0	#DIV/0!	#DIV/0!
21	33	-143	143	18	0	0	#DIV/0!	#DIV/0!
21	35	-149	149	6	0	0	#DIV/0!	#DIV/0!
21	38	-154	154	5	0	0	#DIV/0!	#DIV/0!
21	40	-154	154	0	0	0	#DIV/0!	#DIV/0!
21		-154	154	0	0	0	#DIV/0!	#DIV/0!

## Sheet: stats sDR
% WT fed [84]						condition	chi	pvalue	corrected_pvalue
#days	dead	censored				WT fed v.s. fmo-4 OE fed	22.77	1.8e-06	9.1e-06
0	0					WT fed v.s. fmo-4 KO fed	0.59	0.4436	1
5	0					WT fed v.s. WT sDR	28	1.2e-07	6.1e-07
7	0					WT fed v.s. fmo-4OE sdr	73.63	0	0
10	0					WT fed v.s. fmo-4KO sdr	17.2	3.4e-05	0.0002
12	6					fmo-4 OE fed v.s. WT fed	22.77	1.8e-06	9.1e-06
14	5					fmo-4 OE fed v.s. fmo-4 KO fed	22.28	2.4e-06	1.2e-05
17	11					fmo-4 OE fed v.s. WT sDR	10.89	0.001	0.0048
19	13					fmo-4 OE fed v.s. fmo-4OE sdr	32.69	1.1e-08	5.4e-08
21	10					fmo-4 OE fed v.s. fmo-4KO sdr	3.02	0.0823	0.4117
24	12					fmo-4 KO fed v.s. WT fed	0.59	0.4436	1
26	16					fmo-4 KO fed v.s. fmo-4 OE fed	22.28	2.4e-06	1.2e-05
28	10					fmo-4 KO fed v.s. WT sDR	31.05	2.5e-08	1.3e-07
31	1					fmo-4 KO fed v.s. fmo-4OE sdr	84.96	0	0
33						fmo-4 KO fed v.s. fmo-4KO sdr	14.61	0.0001	0.0007
35						WT sDR v.s. WT fed	28	1.2e-07	6.1e-07
38						WT sDR v.s. fmo-4 OE fed	10.89	0.001	0.0048
40						WT sDR v.s. fmo-4 KO fed	31.05	2.5e-08	1.3e-07
						WT sDR v.s. fmo-4OE sdr	1.23	0.2673	1
						WT sDR v.s. fmo-4KO sdr	18.21	2e-05	0.0001
						fmo-4OE sdr v.s. WT fed	73.63	0	0
% fmo-4 OE fed [89]						fmo-4OE sdr v.s. fmo-4 OE fed	32.69	1.1e-08	5.4e-08
#days	dead	censored				fmo-4OE sdr v.s. fmo-4 KO fed	84.96	0	0
0	0					fmo-4OE sdr v.s. WT sDR	1.23	0.2673	1
5	0					fmo-4OE sdr v.s. fmo-4KO sdr	52.09	0	0
7	0					fmo-4KO sdr v.s. WT fed	17.2	3.4e-05	0.0002
10	0					fmo-4KO sdr v.s. fmo-4 OE fed	3.02	0.0823	0.4117
12	4					fmo-4KO sdr v.s. fmo-4 KO fed	14.61	0.0001	0.0007
14	3					fmo-4KO sdr v.s. WT sDR	18.21	2e-05	0.0001
17	5					fmo-4KO sdr v.s. fmo-4OE sdr	52.09	0	0
19	8
21	11
24	8
26	13
28	17
31	10
33	9
35	1
38
40
% fmo-4 KO fed [131]
#days	dead	censored
0	0
5	0
7	0
10	0
12	7
14	8
17	16
19	17
21	17
24	23
26	23
28	14
31	6
33
35
38
40
% WT sDR [39]
#days	dead	censored
0	0
5	0
7	0
10	0
12	3
14	1
17	2
19	3
21	3
24	2
26	3
28	5
31	3
33	3
35	9
38	1
40	1
% fmo-4OE sdr [111]
#days	dead	censored
0	0
5	0
7	0
10	0
12	5
14	5
17	4
19	5
21	5
24	6
26	7
28	13
31	12
33	16
35	18
38	11
40	4
% fmo-4KO sdr [111]
#days	dead	censored
0	0
5	0
7	0
10	0
12	3
14	4
17	6
19	8
21	9
24	23
26	25
28	19
31	11
33	3
35
38
40

## Sheet: Sheet1
#1	N2								#1	N2					#1	N2
#2	Lei42	fmo-2p::MC; unc-119p::HIF-1(P621A); JT307 #1							#2	Lei42	fmo-2p::MC; unc-119p::HIF-1(P621A); JT307 #1				#11L	Lei51	fmo-2p::MC; JT307; gcy-31; gcy-36 - XA2262 sibling #1
#3	Lei43	fmo-2p::MC; unc-119p::HIF-1(P621A); JT307 #2							#3	Lei43	fmo-2p::MC; unc-119p::HIF-1(P621A); JT307 #2				#12L	Lei52	fmo-2p::MC; JT307; gcy-33; gcy-36 - XA2262 sibling #1
#4	Lei44	fmo-2p::MC; TU3311; CB5602 #1							#4	Lei44	fmo-2p::MC; TU3311; CB5602 #1				#13	Lei53	fmo-2p::MC; JT307; gcy-33; gcy-36 - XA2262 sibling #2
#5	Lei45	fmo-2p::MC; TU3311 #1							#5	Lei45	fmo-2p::MC; TU3311 #1				#14L	Lei55	fmo-2p::MC; JT307 - XA2262 sibling #1
#6	Lei46	fmo-2p::MC; CB5602 #1							#6	Lei46	fmo-2p::MC; CB5602 #1				#15L	Lei56	fmo-2p::MC; JT307 - XA2262 sibling #2
#7	Lei47	fmo-2p::MC; TU3311; CB5602 #2							#7	Lei47	fmo-2p::MC; TU3311; CB5602 #2				#16	Lei57	fmo-2p::MC - XA2262 sibling #1
#8L	Lei48	fmo-2p::MC; JT307; XA2262 #1													#17	Lei58	fmo-2p::MC - XA2262 sibling #2
#9	Lei49	fmo-2p::MC; JT307; XA2262 #2													#18	Lei59	fmo-2p::MC; gcy-33; gcy-36 - XA2262 sibling #1
#10L	Lei50	fmo-2p::MC; JT307; XA2262 #3							#1	N2					#19	Lei60	fmo-2p::MC; gcy-33; gcy-36 - XA2262 sibling #2
#11L	Lei51	fmo-2p::MC; JT307; gcy-31; gcy-36 - XA2262 sibling #1							#8L	Lei48	fmo-2p::MC; JT307; XA2262 #1
#12L	Lei52	fmo-2p::MC; JT307; gcy-33; gcy-36 - XA2262 sibling #1							#9	Lei49	fmo-2p::MC; JT307; XA2262 #2
#13	Lei53	fmo-2p::MC; JT307; gcy-33; gcy-36 - XA2262 sibling #2							#10L	Lei50	fmo-2p::MC; JT307; XA2262 #3
#14L	Lei55	fmo-2p::MC; JT307 - XA2262 sibling #1							#14L	Lei55	fmo-2p::MC; JT307 - XA2262 sibling #1
#15L	Lei56	fmo-2p::MC; JT307 - XA2262 sibling #2							#15L	Lei56	fmo-2p::MC; JT307 - XA2262 sibling #2
#16	Lei57	fmo-2p::MC - XA2262 sibling #1							#16	Lei57	fmo-2p::MC - XA2262 sibling #1
#17	Lei58	fmo-2p::MC - XA2262 sibling #2							#17	Lei58	fmo-2p::MC - XA2262 sibling #2
#18	Lei59	fmo-2p::MC; gcy-33; gcy-36 - XA2262 sibling #1							#20	Lei61	fmo-2p::MC; XA2262 #1
#19	Lei60	fmo-2p::MC; gcy-33; gcy-36 - XA2262 sibling #2							#21	Lei62	fmo-2p::MC; XA2262 #2
#20	Lei61	fmo-2p::MC; XA2262 #1
#21	Lei62	fmo-2p::MC; XA2262 #2
