# Supplementary material for: fmo-4 promotes longevity and stress resistance via ER to mitochondria calcium regulation in C. elegans
Source: eLife journal article supplement (doi:10.7554/elife.99971), 2024-08-27
Supplement: fig1-data2 [file 20NOV2023 RNAi longevity lifespan cyc1 rsks1 itr1 copy.xlsx]

## Sheet: lifespan
strain	day	alive	dead-total	dead-normal	dead-ruptured	censored	ratio-alive	percentage-alive
N2 EV	0	118	0				1	100
N2 EV	5	118	0				1	100
N2 EV	7	118	0				1	100						1	2	3	4	5	6	7	8	9	10	11	12	13	14	15
N2 EV	10	118	0	0			1	100			plot data here-->		day	WT; Empty Vector	FMO-4 OE	FMO-4 KO; Empty Vector	WT; cyc-1 RNAi	FMO-4 OE; cyc-1 RNAi	FMO-4 KO; cyc-1 RNAi	WT; itr-1 RNAi	FMO-4 OE; itr-1 RNAi	FMO-4 KO; itr-1 RNAi	WT; rsks-1	FMO-4 OE; rsks-1	FMO-4 KO; rsks-1
N2 EV	12	116	2	2			0.983051	98.3051				0	0	100	100	100	100	100	100	100	100	100	100	100	100
N2 EV	14	111	7	5			0.940678	94.0678				5	5	100	100	100	100	100	100	100	100	100	100	100	100
N2 EV	17	101	17	10			0.855932	85.5932				7	7	100	100	100	100	100	100	100	100	100	100	100	100
N2 EV	19	91	27	10			0.771186	77.1186				10	10	100	100	100	100	100	100	100	100	100	100	100	100
N2 EV	21	68	50	23			0.576271	57.6271				12	12	98.3051	100	96.6667	100	100	100	96.6667	97.4359	94.7826	100	100	96.4602
N2 EV	24	41	77	27			0.347458	34.7458				14	14	94.0678	98.2759	93.3333	97.5	99.1597	96.6387	86.6667	90.5983	86.087	99.1667	98.3333	92.9204
N2 EV	26	17	101	24			0.144068	14.4068				17	17	85.5932	96.5517	83.3333	95	96.6387	94.958	68.3333	76.9231	67.8261	95.8333	95.8333	81.4159
N2 EV	28	4	114	13			0.0338983	3.38983				19	19	77.1186	93.1034	62.5	93.3333	94.1176	90.7563	39.1667	52.9915	43.4783	92.5	88.3333	68.1416
N2 EV	31	0	118	4			0	0				21	21	57.6271	83.6207	40	86.6667	89.916	78.9916	12.5	26.4957	20.8696	85	73.3333	45.1327
N2 EV	33	0	118				0	0				24	24	34.7458	70.6897	20.8333	74.1667	80.6723	71.4286	5.83333	7.69231	5.21739	70.8333	55	24.7788
N2 EV	35	0	118				0	0				26	26	14.4068	51.7241	7.5	59.1667	66.3866	53.7815	0	2.5641	0	50.8333	38.3333	14.1593
N2 EV	38	0	118				0	0				28	28	3.38983	36.2069	3.33333	40.8333	44.5378	38.6555		0		35.8333	29.1667	7.07965
N2 EV	40	0	118				0	0				31	31	0	25.8621	0	32.5	23.5294	20.1681				25	22.5	1.76991
N2 EV	42	0	118				0	0				33	33		15.5172		22.5	14.2857	13.4454				16.6667	12.5	0
N2 EV	45	0	118				0	0				35	35		8.62069		11.6667	7.56303	4.20168				10	6.66667
												38	38		3.44828		5	3.36134	0				3.4188	2.5
4OE EV	0	116	0				1	100				40	40		0		0	0					0	0
4OE EV	5	116	0				1	100				42	42
4OE EV	7	116	0				1	100				45	45
4OE EV	10	116	0	0			1	100
4OE EV	12	116	0	0			1	100
4OE EV	14	114	2	2			0.982759	98.2759
4OE EV	17	112	4	2			0.965517	96.5517
4OE EV	19	108	8	4			0.931034	93.1034
4OE EV	21	97	19	11			0.836207	83.6207
4OE EV	24	82	34	15			0.706897	70.6897
4OE EV	26	60	56	22			0.517241	51.7241
4OE EV	28	42	74	18			0.362069	36.2069
4OE EV	31	30	86	12			0.258621	25.8621
4OE EV	33	18	98	12			0.155172	15.5172
4OE EV	35	10	106	8			0.0862069	8.62069
4OE EV	38	4	112	6			0.0344828	3.44828
4OE EV	40	0	116	4			0	0
4OE EV	42	0	116				0	0
4OE EV	45	0	116				0	0
4KO EV	0	120	0				1	100
4KO EV	5	120	0				1	100
4KO EV	7	120	0				1	100
4KO EV	10	120	0	0			1	100
4KO EV	12	116	4	4			0.966667	96.6667
4KO EV	14	112	8	4			0.933333	93.3333
4KO EV	17	100	20	12			0.833333	83.3333
4KO EV	19	75	45	25			0.625	62.5
4KO EV	21	48	72	27			0.4	40
4KO EV	24	25	95	23			0.208333	20.8333
4KO EV	26	9	111	16			0.075	7.5
4KO EV	28	4	116	5			0.0333333	3.33333
4KO EV	31	0	120	4			0	0
4KO EV	33	0	120				0	0
4KO EV	35	0	120				0	0
4KO EV	38	0	120				0	0
4KO EV	40	0	120				0	0
4KO EV	42	0	120				0	0
4KO EV	45	0	120				0	0
WT cyc1	0	120	0				1	100
WT cyc1	5	120	0				1	100
WT cyc1	7	120	0				1	100
WT cyc1	10	120	0	0			1	100
WT cyc1	12	120	0	0			1	100
WT cyc1	14	117	3	3			0.975	97.5
WT cyc1	17	114	6	3			0.95	95
WT cyc1	19	112	8	2			0.933333	93.3333
WT cyc1	21	104	16	8			0.866667	86.6667
WT cyc1	24	89	31	15			0.741667	74.1667
WT cyc1	26	71	49	18			0.591667	59.1667
WT cyc1	28	49	71	22			0.408333	40.8333
WT cyc1	31	39	81	10			0.325	32.5
WT cyc1	33	27	93	12			0.225	22.5
WT cyc1	35	14	106	13			0.116667	11.6667
WT cyc1	38	6	114	8			0.05	5
WT cyc1	40	0	120	6			0	0
WT cyc1	42	0	120				0	0
WT cyc1	45	0	120				0	0
4OE cyc1	0	119	0				1	100
4OE cyc1	5	119	0				1	100
4OE cyc1	7	119	0				1	100
4OE cyc1	10	119	0	0			1	100
4OE cyc1	12	119	0	0			1	100
4OE cyc1	14	118	1	1			0.991597	99.1597
4OE cyc1	17	115	4	3			0.966387	96.6387
4OE cyc1	19	112	7	3			0.941176	94.1176
4OE cyc1	21	107	12	5			0.89916	89.916
4OE cyc1	24	96	23	11			0.806723	80.6723
4OE cyc1	26	79	40	17			0.663866	66.3866
4OE cyc1	28	53	66	26			0.445378	44.5378
4OE cyc1	31	28	91	25			0.235294	23.5294
4OE cyc1	33	17	102	11			0.142857	14.2857
4OE cyc1	35	9	110	8			0.0756303	7.56303
4OE cyc1	38	4	115	5			0.0336134	3.36134
4OE cyc1	40	0	119	4			0	0
4OE cyc1	42	0	119				0	0
4OE cyc1	45	0	119				0	0
4KO cyc1	0	119	0				1	100
4KO cyc1	5	119	0				1	100
4KO cyc1	7	119	0				1	100
4KO cyc1	10	119	0	0			1	100
4KO cyc1	12	119	0	0			1	100
4KO cyc1	14	115	4	4			0.966387	96.6387
4KO cyc1	17	113	6	2			0.94958	94.958
4KO cyc1	19	108	11	5			0.907563	90.7563
4KO cyc1	21	94	25	14			0.789916	78.9916
4KO cyc1	24	85	34	9			0.714286	71.4286
4KO cyc1	26	64	55	21			0.537815	53.7815
4KO cyc1	28	46	73	18			0.386555	38.6555
4KO cyc1	31	24	95	22			0.201681	20.1681
4KO cyc1	33	16	103	8			0.134454	13.4454
4KO cyc1	35	5	114	11			0.0420168	4.20168
4KO cyc1	38	0	119	5			0	0
4KO cyc1	40	0	119				0	0
4KO cyc1	42	0	119				0	0
4KO cyc1	45	0	119				0	0
WT itr1	0	120	0				1	100
WT itr1	5	120	0				1	100
WT itr1	7	120	0				1	100
WT itr1	10	120	0	0			1	100
WT itr1	12	116	4	4			0.966667	96.6667
WT itr1	14	104	16	12			0.866667	86.6667
WT itr1	17	82	38	22			0.683333	68.3333
WT itr1	19	47	73	35			0.391667	39.1667
WT itr1	21	15	105	32			0.125	12.5
WT itr1	24	7	113	8			0.0583333	5.83333
WT itr1	26	0	120	7			0	0
WT itr1	28	0	120				0	0
WT itr1	31	0	120				0	0
WT itr1	33	0	120				0	0
WT itr1	35	0	120				0	0
WT itr1	38	0	120				0	0
WT itr1	40	0	120				0	0
WT itr1	42	0	120				0	0
WT itr1	45	0	120				0	0
4OE itr1	0	117	0				1	100
4OE itr1	5	117	0				1	100
4OE itr1	7	117	0				1	100
4OE itr1	10	117	0	0			1	100
4OE itr1	12	114	3	3			0.974359	97.4359
4OE itr1	14	106	11	8			0.905983	90.5983
4OE itr1	17	90	27	16			0.769231	76.9231
4OE itr1	19	62	55	28			0.529915	52.9915
4OE itr1	21	31	86	31			0.264957	26.4957
4OE itr1	24	9	108	22			0.0769231	7.69231
4OE itr1	26	3	114	6			0.025641	2.5641
4OE itr1	28	0	117	3			0	0
4OE itr1	31	0	117				0	0
4OE itr1	33	0	117				0	0
4OE itr1	35	0	117				0	0
4OE itr1	38	0	117				0	0
4OE itr1	40	0	117				0	0
4OE itr1	42	0	117				0	0
4OE itr1	45
4KO itr1	0	115	0				1	100
4KO itr1	5	115	0				1	100
4KO itr1	7	115	0				1	100
4KO itr1	10	115	0	0			1	100
4KO itr1	12	109	6	6			0.947826	94.7826
4KO itr1	14	99	16	10			0.86087	86.087
4KO itr1	17	78	37	21			0.678261	67.8261
4KO itr1	19	50	65	28			0.434783	43.4783
4KO itr1	21	24	91	26			0.208696	20.8696
4KO itr1	24	6	109	18			0.0521739	5.21739
4KO itr1	26	0	115	6			0	0
4KO itr1	28	0	115				0	0
4KO itr1	31	0	115				0	0
4KO itr1	33	0	115				0	0
4KO itr1	35	0	115				0	0
4KO itr1	38	0	115				0	0
4KO itr1	40	0	115				0	0
4KO itr1	42	0	115				0	0
4KO itr1	45	0	115				0	0
4KO itr1	47	0	115				0	0
	0	120	0				1	100
WT rsks1	5	120	0				1	100
WT rsks1	7	120	0				1	100
WT rsks1	10	120	0	0			1	100
WT rsks1	12	120	0	0			1	100
WT rsks1	14	119	1	1			0.991667	99.1667
WT rsks1	17	115	5	4			0.958333	95.8333
WT rsks1	19	111	9	4			0.925	92.5
WT rsks1	21	102	18	9			0.85	85
WT rsks1	24	85	35	17			0.708333	70.8333
WT rsks1	26	61	59	24			0.508333	50.8333
WT rsks1	28	43	77	18			0.358333	35.8333
WT rsks1	31	30	90	13			0.25	25
WT rsks1	33	20	100	10			0.166667	16.6667
WT rsks1	35	12	108	8			0.1	10
WT rsks1	38	4	116	8			0.034188	3.4188
WT rsks1	40	0	120	4			0	0
WT rsks1	42	0	120				0	0
	45
4OE rsks1	0	120	0				1	100
4OE rsks1	5	120	0				1	100
4OE rsks1	7	120	0				1	100
4OE rsks1	10	120	0	0			1	100
4OE rsks1	12	120	0	0			1	100
4OE rsks1	14	118	2	2			0.983333	98.3333
4OE rsks1	17	115	5	3			0.958333	95.8333
4OE rsks1	19	106	14	9			0.883333	88.3333
4OE rsks1	21	88	32	18			0.733333	73.3333
4OE rsks1	24	66	54	22			0.55	55
4OE rsks1	26	46	74	20			0.383333	38.3333
4OE rsks1	28	35	85	11			0.291667	29.1667
4OE rsks1	31	27	93	8			0.225	22.5
4OE rsks1	33	15	105	12			0.125	12.5
4OE rsks1	35	8	112	7			0.0666667	6.66667
4OE rsks1	38	3	117	5			0.025	2.5
4OE rsks1	40	0	120	3			0	0
4OE rsks1	42	0	120				0	0
4OE rsks1	45
4KO rsks1	0	113	0				1	100
4KO rsks1	5	113	0				1	100
4KO rsks1	7	113	0				1	100
4KO rsks1	10	113	0	0			1	100
4KO rsks1	12	109	4	4			0.964602	96.4602
4KO rsks1	14	105	8	4			0.929204	92.9204
4KO rsks1	17	92	21	13			0.814159	81.4159
4KO rsks1	19	77	36	15			0.681416	68.1416
4KO rsks1	21	51	62	26			0.451327	45.1327
4KO rsks1	24	28	85	23			0.247788	24.7788
4KO rsks1	26	16	97	12			0.141593	14.1593
4KO rsks1	28	8	105	8			0.0707965	7.07965
4KO rsks1	31	2	111	6			0.0176991	1.76991
4KO rsks1	33	0	113	2			0	0
4KO rsks1	35	0	113				0	0
4KO rsks1	38	0	113				0	0
4KO rsks1	40	0	113				0	0
4KO rsks1	42	0	113				0	0
4KO rsks1	45
1KO sams1	36	0	0			0	#DIV/0!	#DIV/0!
1KO sams1	38	0	0			0	#DIV/0!	#DIV/0!
1KO sams1	41	0	0			0	#DIV/0!	#DIV/0!
1KO sams1	43	0	0			0	#DIV/0!	#DIV/0!
1KO sams1	45	0	0			0	#DIV/0!	#DIV/0!
							#DIV/0!

## Sheet: rsks1
% WT EV [118]					condition	chi	pvalue	corrected_pvalue
#days	dead	censored			WT EV v.s. fmo-4 OE EV	59.09	0	0
0					WT EV v.s. fmo-4 KO EV	6.43	0.0112	0.056
5					WT EV v.s. WT rsks1	59.74	0	0
7					WT EV v.s. fmo-4 OE rsks1	31.22	2.3e-08	1.2e-07
10	0				WT EV v.s. fmo-4 ko rsks1	0.76	0.3847	1
12	2				fmo-4 OE EV v.s. WT EV	59.09	0	0
14	5				fmo-4 OE EV v.s. fmo-4 KO EV	85.83	0	0
17	10				fmo-4 OE EV v.s. WT rsks1	0	0.9448	1
19	10				fmo-4 OE EV v.s. fmo-4 OE rsks1	2.56	0.1096	0.5478
21	23				fmo-4 OE EV v.s. fmo-4 ko rsks1	63.43	0	0
24	27				fmo-4 KO EV v.s. WT EV	6.43	0.0112	0.056
26	24				fmo-4 KO EV v.s. fmo-4 OE EV	85.83	0	0
28	13				fmo-4 KO EV v.s. WT rsks1	87.21	0	0
31	4				fmo-4 KO EV v.s. fmo-4 OE rsks1	54.39	0	0
33					fmo-4 KO EV v.s. fmo-4 ko rsks1	1.86	0.1732	0.8659
35					WT rsks1 v.s. WT EV	59.74	0	0
38					WT rsks1 v.s. fmo-4 OE EV	0	0.9448	1
40					WT rsks1 v.s. fmo-4 KO EV	87.21	0	0
42					WT rsks1 v.s. fmo-4 OE rsks1	2.88	0.0898	0.4491
45					WT rsks1 v.s. fmo-4 ko rsks1	64.67	0	0
					fmo-4 OE rsks1 v.s. WT EV	31.22	2.3e-08	1.2e-07
% fmo-4 OE EV [116]					fmo-4 OE rsks1 v.s. fmo-4 OE EV	2.56	0.1096	0.5478
#days	dead	censored			fmo-4 OE rsks1 v.s. fmo-4 KO EV	54.39	0	0
0					fmo-4 OE rsks1 v.s. WT rsks1	2.88	0.0898	0.4491
5					fmo-4 OE rsks1 v.s. fmo-4 ko rsks1	38.28	0	0
7					fmo-4 ko rsks1 v.s. WT EV	0.76	0.3847	1
10	0				fmo-4 ko rsks1 v.s. fmo-4 OE EV	63.43	0	0
12	0				fmo-4 ko rsks1 v.s. fmo-4 KO EV	1.86	0.1732	0.8659
14	2				fmo-4 ko rsks1 v.s. WT rsks1	64.67	0	0
17	2				fmo-4 ko rsks1 v.s. fmo-4 OE rsks1	38.28	0	0
19	4
21	11
24	15
26	22
28	18
31	12
33	12
35	8
38	6
40	4
42
45
% fmo-4 KO EV [120]
#days	dead	censored
0
5
7
10	0
12	4
14	4
17	12
19	25
21	27
24	23
26	16
28	5
31	4
33
35
38
40
42
45
% WT rsks1 [120]
#days	dead	censored
0
5
7
10	0
12	0
14	1
17	4
19	4
21	9
24	17
26	24
28	18
31	13
33	10
35	8
38	8
40	4
42
45
% fmo-4 OE rsks1 [120]
#days	dead	censored
0
5
7
10	0
12	0
14	2
17	3
19	9
21	18
24	22
26	20
28	11
31	8
33	12
35	7
38	5
40	3
42
45
% fmo-4 ko rsks1 [113]
#days	dead	censored
0
5
7
10	0
12	4
14	4
17	13
19	15
21	26
24	23
26	12
28	8
31	6
33	2
35
38
40
42
45

## Sheet: itr1
% WT EV [118]						condition	chi	pvalue	corrected_pvalue
#days	dead	censored				WT EV v.s. fmo-4 OE EV	59.09	0	0
0						WT EV v.s. fmo-4 KO EV	6.43	0.0112	0.056
5						WT EV v.s. WT itr1	57.37	0	0
7						WT EV v.s. fmo-4 OE itr1	31.15	2.4e-08	1.2e-07
10	0					WT EV v.s. fmo-4 ko itr1	48.33	0	0
12	2					fmo-4 OE EV v.s. WT EV	59.09	0	0
14	5					fmo-4 OE EV v.s. fmo-4 KO EV	85.83	0	0
17	10					fmo-4 OE EV v.s. WT itr1	152.1	0	0
19	10					fmo-4 OE EV v.s. fmo-4 OE itr1	124.01	0	0
21	23					fmo-4 OE EV v.s. fmo-4 ko itr1	142.48	0	0
24	27					fmo-4 KO EV v.s. WT EV	6.43	0.0112	0.056
26	24					fmo-4 KO EV v.s. fmo-4 OE EV	85.83	0	0
28	13					fmo-4 KO EV v.s. WT itr1	25.37	4.7e-07	2.4e-06
31	4					fmo-4 KO EV v.s. fmo-4 OE itr1	8.31	0.0039	0.0197
33						fmo-4 KO EV v.s. fmo-4 ko itr1	18.96	1.3e-05	0.0001
35						WT itr1 v.s. WT EV	57.37	0	0
38						WT itr1 v.s. fmo-4 OE EV	152.1	0	0
40						WT itr1 v.s. fmo-4 KO EV	25.37	4.7e-07	2.4e-06
42						WT itr1 v.s. fmo-4 OE itr1	6.57	0.0104	0.0518
45						WT itr1 v.s. fmo-4 ko itr1	0.51	0.4753	1
						fmo-4 OE itr1 v.s. WT EV	31.15	2.4e-08	1.2e-07
% fmo-4 OE EV [116]						fmo-4 OE itr1 v.s. fmo-4 OE EV	124.01	0	0
#days	dead	censored				fmo-4 OE itr1 v.s. fmo-4 KO EV	8.31	0.0039	0.0197
0						fmo-4 OE itr1 v.s. WT itr1	6.57	0.0104	0.0518
5						fmo-4 OE itr1 v.s. fmo-4 ko itr1	3.08	0.0793	0.3966
7						fmo-4 ko itr1 v.s. WT EV	48.33	0	0
10	0					fmo-4 ko itr1 v.s. fmo-4 OE EV	142.48	0	0
12	0					fmo-4 ko itr1 v.s. fmo-4 KO EV	18.96	1.3e-05	0.0001
14	2					fmo-4 ko itr1 v.s. WT itr1	0.51	0.4753	1
17	2					fmo-4 ko itr1 v.s. fmo-4 OE itr1	3.08	0.0793	0.3966
19	4
21	11
24	15
26	22
28	18
31	12
33	12
35	8
38	6
40	4
42
45
% fmo-4 KO EV [120]
#days	dead	censored
0
5
7
10	0
12	4
14	4
17	12
19	25
21	27
24	23
26	16
28	5
31	4
33
35
38
40
42
45
% WT itr1 [120]
#days	dead	censored
0
5
7
10	0
12	4
14	12
17	22
19	35
21	32
24	8
26	7
28
31
33
35
38
40
42
45
% fmo-4 OE itr1 [117]
#days	dead	censored
0
5
7
10	0
12	3
14	8
17	16
19	28
21	31
24	22
26	6
28	3
31
33
35
38
40
42
45
% fmo-4 ko itr1 [115]
#days	dead	censored
0
5
7
10	0
12	6
14	10
17	21
19	28
21	26
24	18
26	6
28
31
33
35
38
40
42
45

## Sheet: cyc1
% WT EV [118]						condition	chi	pvalue	corrected_pvalue
#days	dead	censored				WT EV v.s. fmo-4 OE EV	59.09	0	0
0						WT EV v.s. fmo-4 KO EV	6.43	0.0112	0.056
5						WT EV v.s. WT cyc1	74.95	0	0
7						WT EV v.s. fmo-4 OE cyc1	89.26	0	0
10	0					WT EV v.s. fmo-4 ko cyc1	57.89	0	0
12	2					fmo-4 OE EV v.s. WT EV	59.09	0	0
14	5					fmo-4 OE EV v.s. fmo-4 KO EV	85.83	0	0
17	10					fmo-4 OE EV v.s. WT cyc1	1.53	0.2167	1
19	10					fmo-4 OE EV v.s. fmo-4 OE cyc1	0.65	0.4189	1
21	23					fmo-4 OE EV v.s. fmo-4 ko cyc1	0.7	0.4014	1
24	27					fmo-4 KO EV v.s. WT EV	6.43	0.0112	0.056
26	24					fmo-4 KO EV v.s. fmo-4 OE EV	85.83	0	0
28	13					fmo-4 KO EV v.s. WT cyc1	102.1	0	0
31	4					fmo-4 KO EV v.s. fmo-4 OE cyc1	116.46	0	0
33						fmo-4 KO EV v.s. fmo-4 ko cyc1	82.24	0	0
35						WT cyc1 v.s. WT EV	74.95	0	0
38						WT cyc1 v.s. fmo-4 OE EV	1.53	0.2167	1
40						WT cyc1 v.s. fmo-4 KO EV	102.1	0	0
42						WT cyc1 v.s. fmo-4 OE cyc1	0.27	0.6016	1
45						WT cyc1 v.s. fmo-4 ko cyc1	4.63	0.0314	0.1568
						fmo-4 OE cyc1 v.s. WT EV	89.26	0	0
% fmo-4 OE EV [116]						fmo-4 OE cyc1 v.s. fmo-4 OE EV	0.65	0.4189	1
#days	dead	censored				fmo-4 OE cyc1 v.s. fmo-4 KO EV	116.46	0	0
0						fmo-4 OE cyc1 v.s. WT cyc1	0.27	0.6016	1
5						fmo-4 OE cyc1 v.s. fmo-4 ko cyc1	2.71	0.0999	0.4996
7						fmo-4 ko cyc1 v.s. WT EV	57.89	0	0
10	0					fmo-4 ko cyc1 v.s. fmo-4 OE EV	0.7	0.4014	1
12	0					fmo-4 ko cyc1 v.s. fmo-4 KO EV	82.24	0	0
14	2					fmo-4 ko cyc1 v.s. WT cyc1	4.63	0.0314	0.1568
17	2					fmo-4 ko cyc1 v.s. fmo-4 OE cyc1	2.71	0.0999	0.4996
19	4
21	11
24	15
26	22
28	18
31	12
33	12
35	8
38	6
40	4
42
45
% fmo-4 KO EV [120]
#days	dead	censored
0
5
7
10	0
12	4
14	4
17	12
19	25
21	27
24	23
26	16
28	5
31	4
33
35
38
40
42
45
% WT cyc1 [120]
#days	dead	censored
0
5
7
10	0
12	0
14	3
17	3
19	2
21	8
24	15
26	18
28	22
31	10
33	12
35	13
38	8
40	6
42
45
% fmo-4 OE cyc1 [119]
#days	dead	censored
0
5
7
10	0
12	0
14	1
17	3
19	3
21	5
24	11
26	17
28	26
31	25
33	11
35	8
38	5
40	4
42
45
% fmo-4 ko cyc1 [119]
#days	dead	censored
0
5
7
10	0
12	0
14	4
17	2
19	5
21	14
24	9
26	21
28	18
31	22
33	8
35	11
38	5
40
42
45

## Sheet: vhl1 stats
% WT EV [119]						condition	chi	pvalue	corrected_pvalue
#days	dead	censored				WT EV v.s. WT vhl	20.23	6.9e-06	2.1e-05	****
0						WT EV v.s. 4OE vhl1	55.76	0	0	****
5						WT EV v.s. fmo-4 KO vhl1	10.49	0.0012	0.0036	***
7						WT vhl v.s. WT EV	20.23	6.9e-06	2.1e-05
9	0					WT vhl v.s. 4OE vhl1	14.77	0.0001	0.0004
13	5					WT vhl v.s. fmo-4 KO vhl1	0.16	0.6861	1
15	1					4OE vhl1 v.s. WT EV	55.76	0	0
17	4					4OE vhl1 v.s. WT vhl	14.77	0.0001	0.0004
20	11					4OE vhl1 v.s. fmo-4 KO vhl1	13.98	0.0002	0.0006
22	16					fmo-4 KO vhl1 v.s. WT EV	10.49	0.0012	0.0036
24	20					fmo-4 KO vhl1 v.s. WT vhl	0.16	0.6861	1
27	35					fmo-4 KO vhl1 v.s. 4OE vhl1	13.98	0.0002	0.0006
29	17
31	9
34	1
36
38
41
43
45
% WT vhl [122]
#days	dead	censored
0
5
7
9
13	4
15	0
17	2
20	4
22	7
24	21
27	21
29	35
31	23
34	4
36	1
38
41
43
45
% 4OE vhl1 [122]
#days	dead	censored
0
5
7
9
13	1
15	1
17	3
20	5
22	5
24	10
27	13
29	31
31	34
34	13
36	3
38	2
41	1
43
45
% fmo-4 KO vhl1 [122]
#days	dead	censored
0
5
7
9
13	3
15	3
17	4
20	10
22	11
24	20
27	22
29	18
31	19
34	11
36	0
38	1
41
43
45

## Sheet: daf2 stats
% WT EV [119]					condition	chi	pvalue	corrected_pvalue
#days	dead	censored			WT EV v.s. WT daf2	145.16	0	0	****
0					WT EV v.s. 4OE daf2	187.13	0	0	****
5					WT EV v.s. fmo-4 KO daf2	39.59	0	0	****
7					WT daf2 v.s. WT EV	145.16	0	0
9	0				WT daf2 v.s. 4OE daf2	5.99	0.0144	0.0432
13	5				WT daf2 v.s. fmo-4 KO daf2	10.01	0.0016	0.0047
15	1				4OE daf2 v.s. WT EV	187.13	0	0
17	4				4OE daf2 v.s. WT daf2	5.99	0.0144	0.0432
20	11				4OE daf2 v.s. fmo-4 KO daf2	26.68	2.4e-07	7.2e-07
22	16				fmo-4 KO daf2 v.s. WT EV	39.59	0	0
24	20				fmo-4 KO daf2 v.s. WT daf2	10.01	0.0016	0.0047
27	35				fmo-4 KO daf2 v.s. 4OE daf2	26.68	2.4e-07	7.2e-07
29	17
31	9
34	1
36
38
41
43
45
% WT daf2 [109]
#days	dead	censored
0
5
7
9
13	2
15	0
17	0
20	1
22	2
24	5
27	4
29	11
31	10
34	26
36	21
38	15
41	7
43	5
45
% 4OE daf2 [116]
#days	dead	censored
0
5
7
9	0
13	0
15	0
17	0
20	1
22	2
24	2
27	3
29	9
31	10
34	30
36	18
38	10
41	21
43	9
45	1
% fmo-4 KO daf2 [121]
#days	dead	censored
0
5
7
9	0
13	6
15	2
17	7
20	12
22	9
24	8
27	7
29	13
31	12
34	16
36	9
38	6
41	8
43	5
45	1

## Sheet: Sheet1
#1	N2								#1	N2					#1	N2
#2	Lei42	fmo-2p::MC; unc-119p::HIF-1(P621A); JT307 #1							#2	Lei42	fmo-2p::MC; unc-119p::HIF-1(P621A); JT307 #1				#11L	Lei51	fmo-2p::MC; JT307; gcy-31; gcy-36 - XA2262 sibling #1
#3	Lei43	fmo-2p::MC; unc-119p::HIF-1(P621A); JT307 #2							#3	Lei43	fmo-2p::MC; unc-119p::HIF-1(P621A); JT307 #2				#12L	Lei52	fmo-2p::MC; JT307; gcy-33; gcy-36 - XA2262 sibling #1
#4	Lei44	fmo-2p::MC; TU3311; CB5602 #1							#4	Lei44	fmo-2p::MC; TU3311; CB5602 #1				#13	Lei53	fmo-2p::MC; JT307; gcy-33; gcy-36 - XA2262 sibling #2
#5	Lei45	fmo-2p::MC; TU3311 #1							#5	Lei45	fmo-2p::MC; TU3311 #1				#14L	Lei55	fmo-2p::MC; JT307 - XA2262 sibling #1
#6	Lei46	fmo-2p::MC; CB5602 #1							#6	Lei46	fmo-2p::MC; CB5602 #1				#15L	Lei56	fmo-2p::MC; JT307 - XA2262 sibling #2
#7	Lei47	fmo-2p::MC; TU3311; CB5602 #2							#7	Lei47	fmo-2p::MC; TU3311; CB5602 #2				#16	Lei57	fmo-2p::MC - XA2262 sibling #1
#8L	Lei48	fmo-2p::MC; JT307; XA2262 #1													#17	Lei58	fmo-2p::MC - XA2262 sibling #2
#9	Lei49	fmo-2p::MC; JT307; XA2262 #2													#18	Lei59	fmo-2p::MC; gcy-33; gcy-36 - XA2262 sibling #1
#10L	Lei50	fmo-2p::MC; JT307; XA2262 #3							#1	N2					#19	Lei60	fmo-2p::MC; gcy-33; gcy-36 - XA2262 sibling #2
#11L	Lei51	fmo-2p::MC; JT307; gcy-31; gcy-36 - XA2262 sibling #1							#8L	Lei48	fmo-2p::MC; JT307; XA2262 #1
#12L	Lei52	fmo-2p::MC; JT307; gcy-33; gcy-36 - XA2262 sibling #1							#9	Lei49	fmo-2p::MC; JT307; XA2262 #2
#13	Lei53	fmo-2p::MC; JT307; gcy-33; gcy-36 - XA2262 sibling #2							#10L	Lei50	fmo-2p::MC; JT307; XA2262 #3
#14L	Lei55	fmo-2p::MC; JT307 - XA2262 sibling #1							#14L	Lei55	fmo-2p::MC; JT307 - XA2262 sibling #1
#15L	Lei56	fmo-2p::MC; JT307 - XA2262 sibling #2							#15L	Lei56	fmo-2p::MC; JT307 - XA2262 sibling #2
#16	Lei57	fmo-2p::MC - XA2262 sibling #1							#16	Lei57	fmo-2p::MC - XA2262 sibling #1
#17	Lei58	fmo-2p::MC - XA2262 sibling #2							#17	Lei58	fmo-2p::MC - XA2262 sibling #2
#18	Lei59	fmo-2p::MC; gcy-33; gcy-36 - XA2262 sibling #1							#20	Lei61	fmo-2p::MC; XA2262 #1
#19	Lei60	fmo-2p::MC; gcy-33; gcy-36 - XA2262 sibling #2							#21	Lei62	fmo-2p::MC; XA2262 #2
#20	Lei61	fmo-2p::MC; XA2262 #1
#21	Lei62	fmo-2p::MC; XA2262 #2
