# Supplementary material for: fmo-4 promotes longevity and stress resistance via ER to mitochondria calcium regulation in C. elegans
Source: eLife journal article supplement (doi:10.7554/elife.99971), 2024-08-27
Supplement: fig1-data2 [file 23OCT2023 TOR lifespan daf15 let363 rict1 rsks1.xlsx]

## Sheet: lifespan
strain	day	alive	dead-total	dead-normal	dead-ruptured	censored	ratio-alive	percentage-alive
N2 EV	0	117	0				1	100
N2 EV	5	117	0				1	100
N2 EV	7	117	0				1	100						1	2	3	4	5	6	7	8	9	10	11	12	13	14	15
N2 EV	10	117	0	0			1	100			plot data here-->		day	WT; Empty Vector	FMO-4 OE; Empty Vector	FMO-4 KO; Empty Vector	WT; daf-15 RNAi	FMO-4 OE; daf-15 RNAi	FMO-4 KO; daf-15 RNAi	WT; let-363 RNAi	FMO-4 OE; let-363 RNAi	FMO-4 KO; let-363 RNAi	WT; rict-1 RNAi	FMO-4 OE; rict-1 RNAi	FMO-4 KO; rict-1 RNAi	WT; rsks-1 RNAi	FMO-4 OE; rsks-1	FMO-4 KO; rsks-1 RNAi
N2 EV	12	112	5	5			0.957265	95.7265				0	0	100	100	100	100	100	100	100	100	100	100	100	100	100	100	100
N2 EV	14	107	10	5			0.91453	91.453				5	5	100	100	100	100	100	100	100	100	100	100	100	100	100	100	100
N2 EV	17	100	17	7			0.854701	85.4701				7	7	100	100	100	100	100	100	100	100	100	100	100	100	100	100	100
N2 EV	19	86	31	14			0.735043	73.5043				10	10	100	100	100	100	100	100	100	100	100	100	100	100	100	100	100
N2 EV	21	76	41	10			0.649573	64.9573				12	12	95.7265	100	93.1818	93.4783	96.2617	93.2584	97.5	99.2188	96.8421	97.5207	98.8372	97.0874	100	100	94.7368
N2 EV	24	36	81	40			0.307692	30.7692				14	14	91.453	97.1429	85.2273	84.7826	91.5888	87.6404	95	97.6562	91.5789	95.0413	98.8372	92.233	97.7011	98.2143	86.3158
N2 EV	26	16	101	20			0.136752	13.6752				17	17	85.4701	94.2857	75	73.913	82.243	75.2809	90.8333	92.9688	82.1053	92.562	93.0233	81.5534	94.2529	94.6429	73.6842
N2 EV	28	8	109	8			0.0683761	6.83761				19	19	73.5043	85.7143	53.4091	64.1304	72.8972	58.427	78.3333	81.25	66.3158	85.9504	75.5814	54.3689	86.2069	80.3571	49.4737
N2 EV	31	0	117	8			0	0				21	21	64.9573	75.2381	22.7273	51.087	64.486	37.0787	63.3333	61.7188	44.2105	77.686	62.7907	31.068	80.4598	62.5	20
N2 EV	33	0	117				0	0				24	24	30.7692	51.4286	5.68182	32.6087	48.5981	12.3596	40	42.1875	25.2632	45.4545	36.0465	14.5631	58.6207	44.6429	2.10526
N2 EV	35	0	117				0	0				26	26	13.6752	27.619	0	18.4783	31.7757	0	13.3333	10.1562	4.21053	20.6612	18.6047	4.85437	32.1839	33.9286	0
N2 EV	38	0	117				0	0				28	28	6.83761	19.0476		6.52174	20.5607		4.16667	3.90625	0	4.13223	8.13953	2.91262	17.2414	23.2143
N2 EV	40	0	117				0	0				31	31	0	11.4286		0	14.0187		0	3.125		0	3.48837	0	10.3448	12.5
N2 EV	42	0	117				0	0				33	33		5.71429			9.34579			1.5625			2.32558		5.74713	5.35714
N2 EV	45	0	117				0	0				35	35		0.952381			2.80374			0.78125			1.16279		1.14943	1.78571
												38	38		0			0			0			0		0	0
4OE EV	0	105	0				1	100				40	40
4OE EV	5	105	0				1	100				42	42
4OE EV	7	105	0				1	100				45	45
4OE EV	10	105	0	0			1	100
4OE EV	12	105	0	0			1	100
4OE EV	14	102	3	3			0.971429	97.1429
4OE EV	17	99	6	3			0.942857	94.2857
4OE EV	19	90	15	9			0.857143	85.7143
4OE EV	21	79	26	11			0.752381	75.2381
4OE EV	24	54	51	25			0.514286	51.4286
4OE EV	26	29	76	25			0.27619	27.619
4OE EV	28	20	85	9			0.190476	19.0476
4OE EV	31	12	93	8			0.114286	11.4286
4OE EV	33	6	99	6			0.0571429	5.71429
4OE EV	35	1	104	5			0.00952381	0.952381
4OE EV	38	0	105	1			0	0
4OE EV	40	0	105				0	0
4OE EV	42	0	105				0	0
4OE EV	45	0	105				0	0
4KO EV	0	88	0				1	100
4KO EV	5	88	0				1	100
4KO EV	7	88	0				1	100
4KO EV	10	88	0	0			1	100
4KO EV	12	82	6	6			0.931818	93.1818
4KO EV	14	75	13	7			0.852273	85.2273
4KO EV	17	66	22	9			0.75	75
4KO EV	19	47	41	19			0.534091	53.4091
4KO EV	21	20	68	27			0.227273	22.7273
4KO EV	24	5	83	15			0.0568182	5.68182
4KO EV	26	0	88	5			0	0
4KO EV	28	0	88				0	0
4KO EV	31	0	88				0	0
4KO EV	33	0	88				0	0
4KO EV	35	0	88				0	0
4KO EV	38	0	88				0	0
4KO EV	40	0	88				0	0
4KO EV	42	0	88				0	0
4KO EV	45	0	88				0	0
WT daf15	0	92	0				1	100
WT daf15	5	92	0				1	100
WT daf15	7	92	0				1	100
WT daf15	10	92	0	0			1	100
WT daf15	12	86	6	6			0.934783	93.4783
WT daf15	14	78	14	8			0.847826	84.7826
WT daf15	17	68	24	10			0.73913	73.913
WT daf15	19	59	33	9			0.641304	64.1304
WT daf15	21	47	45	12			0.51087	51.087
WT daf15	24	30	62	17			0.326087	32.6087
WT daf15	26	17	75	13			0.184783	18.4783
WT daf15	28	6	86	11			0.0652174	6.52174
WT daf15	31	0	92	6			0	0
WT daf15	33	0	92				0	0
WT daf15	35	0	92				0	0
WT daf15	38	0	92				0	0
WT daf15	40	0	92				0	0
WT daf15	42	0	92				0	0
WT daf15	45	0	92				0	0
4OE daf15	0	107	0				1	100
4OE daf15	5	107	0				1	100
4OE daf15	7	107	0				1	100
4OE daf15	10	107	0	0			1	100
4OE daf15	12	103	4	4			0.962617	96.2617
4OE daf15	14	98	9	5			0.915888	91.5888
4OE daf15	17	88	19	10			0.82243	82.243
4OE daf15	19	78	29	10			0.728972	72.8972
4OE daf15	21	69	38	9			0.64486	64.486
4OE daf15	24	52	55	17			0.485981	48.5981
4OE daf15	26	34	73	18			0.317757	31.7757
4OE daf15	28	22	85	12			0.205607	20.5607
4OE daf15	31	15	92	7			0.140187	14.0187
4OE daf15	33	10	97	5			0.0934579	9.34579
4OE daf15	35	3	104	7			0.0280374	2.80374
4OE daf15	38	0	107	3			0	0
4OE daf15	40	0	107				0	0
4OE daf15	42	0	107				0	0
4OE daf15	45	0	107				0	0
4KO daf15	0	89	0				1	100
4KO daf15	5	89	0				1	100
4KO daf15	7	89	0				1	100
4KO daf15	10	89	0	0			1	100
4KO daf15	12	83	6	6			0.932584	93.2584
4KO daf15	14	78	11	5			0.876404	87.6404
4KO daf15	17	67	22	11			0.752809	75.2809
4KO daf15	19	52	37	15			0.58427	58.427
4KO daf15	21	33	56	19			0.370787	37.0787
4KO daf15	24	11	78	22			0.123596	12.3596
4KO daf15	26	0	89	11			0	0
4KO daf15	28	0	89				0	0
4KO daf15	31	0	89				0	0
4KO daf15	33	0	89				0	0
4KO daf15	35	0	89				0	0
4KO daf15	38	0	89				0	0
4KO daf15	40	0	89				0	0
4KO daf15	42	0	89				0	0
4KO daf15	45	0	89				0	0
WT let363	0	120	0				1	100
WT let363	5	120	0				1	100
WT let363	7	120	0				1	100
WT let363	10	120	0	0			1	100
WT let363	12	117	3	3			0.975	97.5
WT let363	14	114	6	3			0.95	95
WT let363	17	109	11	5			0.908333	90.8333
WT let363	19	94	26	15			0.783333	78.3333
WT let363	21	76	44	18			0.633333	63.3333
WT let363	24	48	72	28			0.4	40
WT let363	26	16	104	32			0.133333	13.3333
WT let363	28	5	115	11			0.0416667	4.16667
WT let363	31	0	120	5			0	0
WT let363	33	0	120				0	0
WT let363	35	0	120				0	0
WT let363	38	0	120				0	0
WT let363	40	0	120				0	0
WT let363	42	0	120				0	0
WT let363	45	0	120				0	0
4OE let363	0	128	0				1	100
4OE let363	5	128	0				1	100
4OE let363	7	128	0				1	100
4OE let363	10	128	0	0			1	100
4OE let363	12	127	1	1			0.992188	99.2188
4OE let363	14	125	3	2			0.976562	97.6562
4OE let363	17	119	9	6			0.929688	92.9688
4OE let363	19	104	24	15			0.8125	81.25
4OE let363	21	79	49	25			0.617188	61.7188
4OE let363	24	54	74	25			0.421875	42.1875
4OE let363	26	13	115	41			0.101562	10.1562
4OE let363	28	5	123	8			0.0390625	3.90625
4OE let363	31	4	124	1			0.03125	3.125
4OE let363	33	2	126	2			0.015625	1.5625
4OE let363	35	1	127	1			0.0078125	0.78125
4OE let363	38	0	128	1			0	0
4OE let363	40	0	128				0	0
4OE let363	42	0	128				0	0
4OE let363	45
4KO let363	0	95	0				1	100
4KO let363	5	95	0				1	100
4KO let363	7	95	0				1	100
4KO let363	10	95	0	0			1	100
4KO let363	12	92	3	3			0.968421	96.8421
4KO let363	14	87	8	5			0.915789	91.5789
4KO let363	17	78	17	9			0.821053	82.1053
4KO let363	19	63	32	15			0.663158	66.3158
4KO let363	21	42	53	21			0.442105	44.2105
4KO let363	24	24	71	18			0.252632	25.2632
4KO let363	26	4	91	20			0.0421053	4.21053
4KO let363	28	0	95	4			0	0
4KO let363	31	0	95				0	0
4KO let363	33	0	95				0	0
4KO let363	35	0	95				0	0
4KO let363	38	0	95				0	0
4KO let363	40	0	95				0	0
4KO let363	42	0	95				0	0
4KO let363	45	0	95				0	0
4KO let363	47	0	95				0	0
WT rict1	0	121	0				1	100
WT rict1	5	121	0				1	100
WT rict1	7	121	0				1	100
WT rict1	10	121	0	0			1	100
WT rict1	12	118	3	3			0.975207	97.5207
WT rict1	14	115	6	3			0.950413	95.0413
WT rict1	17	112	9	3			0.92562	92.562
WT rict1	19	104	17	8			0.859504	85.9504
WT rict1	21	94	27	10			0.77686	77.686
WT rict1	24	55	66	39			0.454545	45.4545
WT rict1	26	25	96	30			0.206612	20.6612
WT rict1	28	5	116	20			0.0413223	4.13223
WT rict1	31	0	121	5			0	0
WT rict1	33	0	121				0	0
WT rict1	35	0	121				0	0
WT rict1	38	0	121				0	0
WT rict1	40	0	121				0	0
WT rict1	42	0	121				0	0
	45
4OE rict1	0	86	0				1	100
4OE rict1	5	86	0				1	100
4OE rict1	7	86	0				1	100
4OE rict1	10	86	0	0			1	100
4OE rict1	12	85	1	1			0.988372	98.8372
4OE rict1	14	85	1	0			0.988372	98.8372
4OE rict1	17	80	6	5			0.930233	93.0233
4OE rict1	19	65	21	15			0.755814	75.5814
4OE rict1	21	54	32	11			0.627907	62.7907
4OE rict1	24	31	55	23			0.360465	36.0465
4OE rict1	26	16	70	15			0.186047	18.6047
4OE rict1	28	7	79	9			0.0813953	8.13953
4OE rict1	31	3	83	4			0.0348837	3.48837
4OE rict1	33	2	84	1			0.0232558	2.32558
4OE rict1	35	1	85	1			0.0116279	1.16279
4OE rict1	38	0	86	1			0	0
4OE rict1	40	0	86				0	0
4OE rict1	42	0	86				0	0
4OE rict1	45
4KO rict1	0	103	0				1	100
4KO rict1	5	103	0				1	100
4KO rict1	7	103	0				1	100
4KO rict1	10	103	0	0			1	100
4KO rict1	12	100	3	3			0.970874	97.0874
4KO rict1	14	95	8	5			0.92233	92.233
4KO rict1	17	84	19	11			0.815534	81.5534
4KO rict1	19	56	47	28			0.543689	54.3689
4KO rict1	21	32	71	24			0.31068	31.068
4KO rict1	24	15	88	17			0.145631	14.5631
4KO rict1	26	5	98	10			0.0485437	4.85437
4KO rict1	28	3	100	2			0.0291262	2.91262
4KO rict1	31	0	103	3			0	0
4KO rict1	33	0	103				0	0
4KO rict1	35	0	103				0	0
4KO rict1	38	0	103				0	0
4KO rict1	40	0	103				0	0
4KO rict1	42	0	103				0	0
4KO rict1	45
WT rsks1	0	87	0				1	100
WT rsks1	5	87	0				1	100
WT rsks1	7	87	0				1	100
WT rsks1	10	87	0	0			1	100
WT rsks1	12	87	0	0			1	100
WT rsks1	14	85	2	2			0.977011	97.7011
WT rsks1	17	82	5	3			0.942529	94.2529
WT rsks1	19	75	12	7			0.862069	86.2069
WT rsks1	21	70	17	5			0.804598	80.4598
WT rsks1	24	51	36	19			0.586207	58.6207
WT rsks1	26	28	59	23			0.321839	32.1839
WT rsks1	28	15	72	13			0.172414	17.2414
WT rsks1	31	9	78	6			0.103448	10.3448
WT rsks1	33	5	82	4			0.0574713	5.74713
WT rsks1	35	1	86	4			0.0114943	1.14943
WT rsks1	38	0	87	1			0	0
WT rsks1	40	0	87				0	0
WT rsks1	42	0	87				0	0
WT rsks1	45	0	87				0	0
4OE rsks1	0	56	0				1	100
4OE rsks1	5	56	0				1	100
4OE rsks1	7	56	0				1	100
4OE rsks1	10	56	0	0			1	100
4OE rsks1	12	56	0	0			1	100
4OE rsks1	14	55	1	1			0.982143	98.2143
4OE rsks1	17	53	3	2			0.946429	94.6429
4OE rsks1	19	45	11	8			0.803571	80.3571
4OE rsks1	21	35	21	10			0.625	62.5
4OE rsks1	24	25	31	10			0.446429	44.6429
4OE rsks1	26	19	37	6			0.339286	33.9286
4OE rsks1	28	13	43	6			0.232143	23.2143
4OE rsks1	31	7	49	6			0.125	12.5
4OE rsks1	33	3	53	4			0.0535714	5.35714
4OE rsks1	35	1	55	2			0.0178571	1.78571
4OE rsks1	38	0	56	1			0	0
4OE rsks1	40	0	56				0	0
4OE rsks1	42	0	56				0	0
4OE rsks1	45
4KO rsks1	0	95	0				1	100
4KO rsks1	5	95	0				1	100
4KO rsks1	7	95	0				1	100
4KO rsks1	10	95	0	0			1	100
4KO rsks1	12	90	5	5			0.947368	94.7368
4KO rsks1	14	82	13	8			0.863158	86.3158
4KO rsks1	17	70	25	12			0.736842	73.6842
4KO rsks1	19	47	48	23			0.494737	49.4737
4KO rsks1	21	19	76	28			0.2	20
4KO rsks1	24	2	93	17			0.0210526	2.10526
4KO rsks1	26	0	95	2			0	0
4KO rsks1	28	0	95				0	0
4KO rsks1	31	0	95				0	0
4KO rsks1	33	0	95				0	0
4KO rsks1	35	0	95				0	0
4KO rsks1	38	0	95				0	0
4KO rsks1	40	0	95				0	0
4KO rsks1	42	0	95				0	0
4KO rsks1	45
4KO sams1	0	83	0			0	1	100
4KO sams1	5	83	0			0	1	100
4KO sams1	7	83	0			0	1	100
4KO sams1	10	83	0			0	1	100
4KO sams1	12	83	0			0	1	100
4KO sams1	14	83	0			0	1	100
4KO sams1	17	83	0			0	1	100
4KO sams1	19	83	0			0	1	100
4KO sams1	21	83	0			0	1	100
4KO sams1	24	83	0			0	1	100
4KO sams1	26	83	0			0	1	100
4KO sams1	28	83	0			0	1	100
4KO sams1	31	83	0			0	1	100
4KO sams1	33	83	0			0	1	100
4KO sams1	35	83	0			0	1	100
4KO sams1	38	83	0			0	1	100
4KO sams1	40	83	0			0	1	100
4KO sams1	42	83	0			0	1	100
4KO sams1	45	134	0			0	1	100
1OE sams1	0	114	0			0	1	100
1OE sams1	5	114	0			0	1	100
1OE sams1	7	114	0			0	1	100
1OE sams1	10	114	0			0	1	100
1OE sams1	12	114	0			0	1	100
1OE sams1	14	114	0			0	1	100
1OE sams1	17	114	0			0	1	100
1OE sams1	19	114	0			0	1	100
1OE sams1	21	114	0			0	1	100
1OE sams1	24	114	0			0	1	100
1OE sams1	26	114	0			0	1	100
1OE sams1	28	114	0			0	1	100
1OE sams1	31	114	0			0	1	100
1OE sams1	33	114	0			0	1	100
1OE sams1	35	114	0			0	1	100
1OE sams1	38	114	0			0	1	100
1OE sams1	40	114	0			0	1	100
1OE sams1	42	114	0			0	1	100
1OE sams1	45	114	0			0	1	100
1KO sams1	0	83	0			0	1	100
1KO sams1	5	83	0			0	1	100
1KO sams1	7	83	0			0	1	100
1KO sams1	9	83	0			0	1	100
1KO sams1	13	83	0			0	1	100
1KO sams1	15	83	0			0	1	100
1KO sams1	17	83	0			0	1	100
1KO sams1	20	83	0			0	1	100
1KO sams1	22	83	0			0	1	100
1KO sams1	24	83	0			0	1	100
1KO sams1	27	83	0			0	1	100
1KO sams1	29	83	0			0	1	100
1KO sams1	31	83	0			0	1	100
1KO sams1	34	83	0			0	1	100
1KO sams1	36	83	0			0	1	100
1KO sams1	38	83	0			0	1	100
1KO sams1	41	83	0			0	1	100
1KO sams1	43	83	0			0	1	100
1KO sams1	45	83	0			0	1	100
							0

## Sheet: rsks1
% WT EV [117]					condition	chi	pvalue	corrected_pvalue
#days	dead	censored			WT EV v.s. fmo-4 OE EV	15.22	0.0001	0.0005
0					WT EV v.s. fmo-4 KO EV	36.21	0	0
5					WT EV v.s. WT rsks1	18.48	1.7e-05	0.0001
7					WT EV v.s. fmo-4 OE rsks1	8.69	0.0032	0.016
10	0				WT EV v.s. fmo-4 ko rsks1	45.93	0	0
12	5				fmo-4 OE EV v.s. WT EV	15.22	0.0001	0.0005
14	5				fmo-4 OE EV v.s. fmo-4 KO EV	71.51	0	0
17	7				fmo-4 OE EV v.s. WT rsks1	0.23	0.6331	1
19	14				fmo-4 OE EV v.s. fmo-4 OE rsks1	0.03	0.8561	1
21	10				fmo-4 OE EV v.s. fmo-4 ko rsks1	84.2	0	0
24	40				fmo-4 KO EV v.s. WT EV	36.21	0	0
26	20				fmo-4 KO EV v.s. fmo-4 OE EV	71.51	0	0
28	8				fmo-4 KO EV v.s. WT rsks1	75.75	0	0
31	8				fmo-4 KO EV v.s. fmo-4 OE rsks1	39.08	0	0
33					fmo-4 KO EV v.s. fmo-4 ko rsks1	0.56	0.4527	1
35					WT rsks1 v.s. WT EV	18.48	1.7e-05	0.0001
38					WT rsks1 v.s. fmo-4 OE EV	0.23	0.6331	1
40					WT rsks1 v.s. fmo-4 KO EV	75.75	0	0
42					WT rsks1 v.s. fmo-4 OE rsks1	0.2	0.6549	1
45					WT rsks1 v.s. fmo-4 ko rsks1	87.48	0	0
					fmo-4 OE rsks1 v.s. WT EV	8.69	0.0032	0.016
% fmo-4 OE EV [105]					fmo-4 OE rsks1 v.s. fmo-4 OE EV	0.03	0.8561	1
#days	dead	censored			fmo-4 OE rsks1 v.s. fmo-4 KO EV	39.08	0	0
0					fmo-4 OE rsks1 v.s. WT rsks1	0.2	0.6549	1
5					fmo-4 OE rsks1 v.s. fmo-4 ko rsks1	44.91	0	0
7					fmo-4 ko rsks1 v.s. WT EV	45.93	0	0
10	0				fmo-4 ko rsks1 v.s. fmo-4 OE EV	84.2	0	0
12	0				fmo-4 ko rsks1 v.s. fmo-4 KO EV	0.56	0.4527	1
14	3				fmo-4 ko rsks1 v.s. WT rsks1	87.48	0	0
17	3				fmo-4 ko rsks1 v.s. fmo-4 OE rsks1	44.91	0	0
19	9
21	11
24	25
26	25
28	9
31	8
33	6
35	5
38	1
40
42
45
% fmo-4 KO EV [88]
#days	dead	censored
0
5
7
10	0
12	6
14	7
17	9
19	19
21	27
24	15
26	5
28
31
33
35
38
40
42
45
% WT rsks1 [87]
#days	dead	censored
0
5
7
10	0
12	0
14	2
17	3
19	7
21	5
24	19
26	23
28	13
31	6
33	4
35	4
38	1
40
42
45
% fmo-4 OE rsks1 [56]
#days	dead	censored
0
5
7
10	0
12	0
14	1
17	2
19	8
21	10
24	10
26	6
28	6
31	6
33	4
35	2
38	1
40
42
45
% fmo-4 ko rsks1 [95]
#days	dead	censored
0
5
7
10	0
12	5
14	8
17	12
19	23
21	28
24	17
26	2
28
31
33
35
38
40
42
45

## Sheet: vhl1 stats
% WT EV [119]						condition	chi	pvalue	corrected_pvalue
#days	dead	censored				WT EV v.s. WT vhl	20.23	6.9e-06	2.1e-05	****
0						WT EV v.s. 4OE vhl1	55.76	0	0	****
5						WT EV v.s. fmo-4 KO vhl1	10.49	0.0012	0.0036	***
7						WT vhl v.s. WT EV	20.23	6.9e-06	2.1e-05
9	0					WT vhl v.s. 4OE vhl1	14.77	0.0001	0.0004
13	5					WT vhl v.s. fmo-4 KO vhl1	0.16	0.6861	1
15	1					4OE vhl1 v.s. WT EV	55.76	0	0
17	4					4OE vhl1 v.s. WT vhl	14.77	0.0001	0.0004
20	11					4OE vhl1 v.s. fmo-4 KO vhl1	13.98	0.0002	0.0006
22	16					fmo-4 KO vhl1 v.s. WT EV	10.49	0.0012	0.0036
24	20					fmo-4 KO vhl1 v.s. WT vhl	0.16	0.6861	1
27	35					fmo-4 KO vhl1 v.s. 4OE vhl1	13.98	0.0002	0.0006
29	17
31	9
34	1
36
38
41
43
45
% WT vhl [122]
#days	dead	censored
0
5
7
9
13	4
15	0
17	2
20	4
22	7
24	21
27	21
29	35
31	23
34	4
36	1
38
41
43
45
% 4OE vhl1 [122]
#days	dead	censored
0
5
7
9
13	1
15	1
17	3
20	5
22	5
24	10
27	13
29	31
31	34
34	13
36	3
38	2
41	1
43
45
% fmo-4 KO vhl1 [122]
#days	dead	censored
0
5
7
9
13	3
15	3
17	4
20	10
22	11
24	20
27	22
29	18
31	19
34	11
36	0
38	1
41
43
45

## Sheet: daf2 stats
% WT EV [119]					condition	chi	pvalue	corrected_pvalue
#days	dead	censored			WT EV v.s. WT daf2	145.16	0	0	****
0					WT EV v.s. 4OE daf2	187.13	0	0	****
5					WT EV v.s. fmo-4 KO daf2	39.59	0	0	****
7					WT daf2 v.s. WT EV	145.16	0	0
9	0				WT daf2 v.s. 4OE daf2	5.99	0.0144	0.0432
13	5				WT daf2 v.s. fmo-4 KO daf2	10.01	0.0016	0.0047
15	1				4OE daf2 v.s. WT EV	187.13	0	0
17	4				4OE daf2 v.s. WT daf2	5.99	0.0144	0.0432
20	11				4OE daf2 v.s. fmo-4 KO daf2	26.68	2.4e-07	7.2e-07
22	16				fmo-4 KO daf2 v.s. WT EV	39.59	0	0
24	20				fmo-4 KO daf2 v.s. WT daf2	10.01	0.0016	0.0047
27	35				fmo-4 KO daf2 v.s. 4OE daf2	26.68	2.4e-07	7.2e-07
29	17
31	9
34	1
36
38
41
43
45
% WT daf2 [109]
#days	dead	censored
0
5
7
9
13	2
15	0
17	0
20	1
22	2
24	5
27	4
29	11
31	10
34	26
36	21
38	15
41	7
43	5
45
% 4OE daf2 [116]
#days	dead	censored
0
5
7
9	0
13	0
15	0
17	0
20	1
22	2
24	2
27	3
29	9
31	10
34	30
36	18
38	10
41	21
43	9
45	1
% fmo-4 KO daf2 [121]
#days	dead	censored
0
5
7
9	0
13	6
15	2
17	7
20	12
22	9
24	8
27	7
29	13
31	12
34	16
36	9
38	6
41	8
43	5
45	1

## Sheet: Sheet1
#1	N2								#1	N2					#1	N2
#2	Lei42	fmo-2p::MC; unc-119p::HIF-1(P621A); JT307 #1							#2	Lei42	fmo-2p::MC; unc-119p::HIF-1(P621A); JT307 #1				#11L	Lei51	fmo-2p::MC; JT307; gcy-31; gcy-36 - XA2262 sibling #1
#3	Lei43	fmo-2p::MC; unc-119p::HIF-1(P621A); JT307 #2							#3	Lei43	fmo-2p::MC; unc-119p::HIF-1(P621A); JT307 #2				#12L	Lei52	fmo-2p::MC; JT307; gcy-33; gcy-36 - XA2262 sibling #1
#4	Lei44	fmo-2p::MC; TU3311; CB5602 #1							#4	Lei44	fmo-2p::MC; TU3311; CB5602 #1				#13	Lei53	fmo-2p::MC; JT307; gcy-33; gcy-36 - XA2262 sibling #2
#5	Lei45	fmo-2p::MC; TU3311 #1							#5	Lei45	fmo-2p::MC; TU3311 #1				#14L	Lei55	fmo-2p::MC; JT307 - XA2262 sibling #1
#6	Lei46	fmo-2p::MC; CB5602 #1							#6	Lei46	fmo-2p::MC; CB5602 #1				#15L	Lei56	fmo-2p::MC; JT307 - XA2262 sibling #2
#7	Lei47	fmo-2p::MC; TU3311; CB5602 #2							#7	Lei47	fmo-2p::MC; TU3311; CB5602 #2				#16	Lei57	fmo-2p::MC - XA2262 sibling #1
#8L	Lei48	fmo-2p::MC; JT307; XA2262 #1													#17	Lei58	fmo-2p::MC - XA2262 sibling #2
#9	Lei49	fmo-2p::MC; JT307; XA2262 #2													#18	Lei59	fmo-2p::MC; gcy-33; gcy-36 - XA2262 sibling #1
#10L	Lei50	fmo-2p::MC; JT307; XA2262 #3							#1	N2					#19	Lei60	fmo-2p::MC; gcy-33; gcy-36 - XA2262 sibling #2
#11L	Lei51	fmo-2p::MC; JT307; gcy-31; gcy-36 - XA2262 sibling #1							#8L	Lei48	fmo-2p::MC; JT307; XA2262 #1
#12L	Lei52	fmo-2p::MC; JT307; gcy-33; gcy-36 - XA2262 sibling #1							#9	Lei49	fmo-2p::MC; JT307; XA2262 #2
#13	Lei53	fmo-2p::MC; JT307; gcy-33; gcy-36 - XA2262 sibling #2							#10L	Lei50	fmo-2p::MC; JT307; XA2262 #3
#14L	Lei55	fmo-2p::MC; JT307 - XA2262 sibling #1							#14L	Lei55	fmo-2p::MC; JT307 - XA2262 sibling #1
#15L	Lei56	fmo-2p::MC; JT307 - XA2262 sibling #2							#15L	Lei56	fmo-2p::MC; JT307 - XA2262 sibling #2
#16	Lei57	fmo-2p::MC - XA2262 sibling #1							#16	Lei57	fmo-2p::MC - XA2262 sibling #1
#17	Lei58	fmo-2p::MC - XA2262 sibling #2							#17	Lei58	fmo-2p::MC - XA2262 sibling #2
#18	Lei59	fmo-2p::MC; gcy-33; gcy-36 - XA2262 sibling #1							#20	Lei61	fmo-2p::MC; XA2262 #1
#19	Lei60	fmo-2p::MC; gcy-33; gcy-36 - XA2262 sibling #2							#21	Lei62	fmo-2p::MC; XA2262 #2
#20	Lei61	fmo-2p::MC; XA2262 #1
#21	Lei62	fmo-2p::MC; XA2262 #2
