# Supplementary material for: fmo-4 promotes longevity and stress resistance via ER to mitochondria calcium regulation in C. elegans
Source: eLife journal article supplement (doi:10.7554/elife.99971), 2024-08-27
Supplement: fig1-data3 [file 02.04.2022 fmo4 and fmo1 daf2 and vhl-1 RNAi lifespan.xlsx]

## Sheet: lifespan
strain	day	alive	dead-total	dead-normal	dead-ruptured	censored	ratio-alive	percentage-alive
N2 EV	0	119	0				1	100
N2 EV	5	119	0				1	100
N2 EV	7	119	0				1	100						1	2	3	4	5	6	7	8	9	10	11	12	13	14	15
N2 EV	9	119	0	0			1	100			plot data here-->		day	WT EV	4OE EV	4KO EV	WT; daf-2 RNAi	4OE; daf-2 RNAi	4KO; daf-2 RNAi	1OE; daf-2 RNAi	1KO; daf-2 RNAi	WT; vhl-1 RNAi	4OE; vhl-1 RNAi	4KO; vhl-1 RNAi	1OE; vhl-1 RNAi	1KO; vhl-1 RNAi	WT; sams-1 RNAi	4OE; sams-1 RNAi	4KO; sams-1 RNAi	1OE; sams-1 RNAi	1KO; sams-1 RNAi	1KO; sams-1 RNAi
N2 EV	13	114	5	5			0.957983	95.7983				0	0	100	100	100	100	100	100	100	100	100	100	100	100	100	100	100	100	100	100	100
N2 EV	15	113	6	1			0.94958	94.958				5	5	100	100	100	100	100	100	100	100	100	100	100	100	100	100	100	100	100	100	100
N2 EV	17	109	10	4			0.915966	91.5966				7	7	100	100	100	100	100	100	100	100	100	100	100	100	100	100	100	100	100	100	100
N2 EV	20	98	21	11			0.823529	82.3529				10	10	100	100	100	100	100	100	100	100	100	100	100	100	100	100	100	100	100	100	100
N2 EV	22	82	37	16			0.689076	68.9076				13	13	95.7983	93.8053	93.1034	98.1651	100	95.0413	100	95.7265	96.7213	99.1803	97.541	94.7368	95.935	97.1429	97.0588	92.7711	98.2456	90.3614	90.3614
N2 EV	24	62	57	20			0.521008	52.1008				15	15	94.958	91.1504	87.3563	98.1651	100	93.3884	100	95.7265	96.7213	98.3607	95.082	93.8596	95.122	94.2857	95.098	87.9518	97.3684	81.9277	81.9277
N2 EV	27	27	92	35			0.226891	22.6891				17	17	91.5966	85.8407	81.6092	98.1651	100	87.6033	96.3303	94.0171	95.082	95.9016	91.8033	89.4737	92.6829	89.5238	90.1961	69.8795	91.2281	66.2651	66.2651
N2 EV	29	10	109	17			0.0840336	8.40336				20	20	82.3529	80.531	77.0115	97.2477	99.1379	77.686	91.7431	93.1624	91.8033	91.8033	83.6066	78.9474	87.8049	79.0476	77.451	51.8072	83.3333	39.759	39.759
N2 EV	31	1	118	9			0.00840336	0.840336				22	22	68.9076	76.9912	67.8161	95.4128	97.4138	70.2479	86.2385	91.453	86.0656	87.7049	74.5902	70.1754	73.1707	66.6667	53.9216	34.9398	75.4386	3.61446	3.61446
N2 EV	34	0	119	1			0	0				24	24	52.1008	68.1416	45.977	90.8257	95.6897	63.6364	81.6514	88.8889	68.8525	79.5082	58.1967	59.6491	49.5935	47.619	30.3922	13.253	61.4035	2.40964	2.40964
N2 EV	36	0	119				0	0				27	27	22.6891	54.8673	22.9885	87.156	93.1034	57.8512	77.0642	86.3248	51.6393	68.8525	40.1639	43.8596	27.6423	28.5714	6.86275	6.0241	45.614	0	0
N2 EV	38	0	119				0	0				29	29	8.40336	33.6283	4.5977	77.0642	85.3448	47.1074	69.7248	78.6325	22.9508	43.4426	25.4098	18.4211	4.06504	1.90476	0	1.20482	14.9123
N2 EV	41	0	119				0	0				31	31	0.840336	16.8142	0	67.8899	76.7241	37.1901	58.7156	67.5214	4.09836	15.5738	9.83607	8.77193	0	0		0	2.63158
N2 EV	43	0	119				0	0				34	34	0	2.65487		44.0367	50.8621	23.9669	40.367	41.8803	0.819672	4.91803	0.819672	2.63158					0
N2 EV	45	0	119				0	0				36	36		1.76991		24.7706	35.3448	16.5289	27.5229	29.0598	0	2.45902	0.819672	0.877193
												38	38		0		11.0092	26.7241	11.5702	12.844	17.9487		0.833333	0	0
4OE EV	0	113	0				1	100				41	41				4.58716	8.62069	4.95868	7.33945	5.12821		0
4OE EV	5	113	0				1	100				43	43				0	0.862069	0.826446	0	0
4OE EV	7	113	0				1	100				45	45					0	0
4OE EV	9	113	0	0			1	100
4OE EV	13	106	7	7			0.938053	93.8053
4OE EV	15	103	10	3			0.911504	91.1504
4OE EV	17	97	16	6			0.858407	85.8407
4OE EV	20	91	22	6			0.80531	80.531
4OE EV	22	87	26	4			0.769912	76.9912
4OE EV	24	77	36	10			0.681416	68.1416
4OE EV	27	62	51	15			0.548673	54.8673
4OE EV	29	38	75	24			0.336283	33.6283
4OE EV	31	19	94	19			0.168142	16.8142
4OE EV	34	3	110	16			0.0265487	2.65487
4OE EV	36	2	111	1			0.0176991	1.76991
4OE EV	38	0	113	2			0	0
4OE EV	41	0	113				0	0
4OE EV	43	0	113				0	0
4OE EV	45	0	113				0	0
4KO EV	0	87	0				1	100
4KO EV	5	87	0				1	100
4KO EV	7	87	0				1	100
4KO EV	9	87	0	0			1	100
4KO EV	13	81	6	6			0.931034	93.1034
4KO EV	15	76	11	5			0.873563	87.3563
4KO EV	17	71	16	5			0.816092	81.6092
4KO EV	20	67	20	4			0.770115	77.0115
4KO EV	22	59	28	8			0.678161	67.8161
4KO EV	24	40	47	19			0.45977	45.977
4KO EV	27	20	67	20			0.229885	22.9885
4KO EV	29	4	83	16			0.045977	4.5977
4KO EV	31	0	87	4			0	0
4KO EV	34	0	87				0	0
4KO EV	36	0	87				0	0
4KO EV	38	0	87				0	0
4KO EV	41	0	87				0	0
4KO EV	43	0	87				0	0
4KO EV	45	0	87				0	0
N2 daf2	0	109	0				1	100
N2 daf2	5	109	0				1	100
N2 daf2	7	109	0				1	100
N2 daf2	9	109	0				1	100
N2 daf2	13	107	2	2			0.981651	98.1651
N2 daf2	15	107	2	0			0.981651	98.1651
N2 daf2	17	107	2	0			0.981651	98.1651
N2 daf2	20	106	3	1			0.972477	97.2477
N2 daf2	22	104	5	2			0.954128	95.4128
N2 daf2	24	99	10	5			0.908257	90.8257
N2 daf2	27	95	14	4			0.87156	87.156
N2 daf2	29	84	25	11			0.770642	77.0642
N2 daf2	31	74	35	10			0.678899	67.8899
N2 daf2	34	48	61	26			0.440367	44.0367
N2 daf2	36	27	82	21			0.247706	24.7706
N2 daf2	38	12	97	15			0.110092	11.0092
N2 daf2	41	5	104	7			0.0458716	4.58716
N2 daf2	43	0	109	5			0	0
N2 daf2	45	0	109				0	0
4OE daf2	0	116	0				1	100
4OE daf2	5	116	0				1	100
4OE daf2	7	116	0				1	100
4OE daf2	9	116	0	0			1	100
4OE daf2	13	116	0	0			1	100
4OE daf2	15	116	0	0			1	100
4OE daf2	17	116	0	0			1	100
4OE daf2	20	115	1	1			0.991379	99.1379
4OE daf2	22	113	3	2			0.974138	97.4138
4OE daf2	24	111	5	2			0.956897	95.6897
4OE daf2	27	108	8	3			0.931034	93.1034
4OE daf2	29	99	17	9			0.853448	85.3448
4OE daf2	31	89	27	10			0.767241	76.7241
4OE daf2	34	59	57	30			0.508621	50.8621
4OE daf2	36	41	75	18			0.353448	35.3448
4OE daf2	38	31	85	10			0.267241	26.7241
4OE daf2	41	10	106	21			0.0862069	8.62069
4OE daf2	43	1	115	9			0.00862069	0.862069
4OE daf2	45	0	116	1			0	0
4KO daf2	0	121	0				1	100
4KO daf2	5	121	0				1	100
4KO daf2	7	121	0				1	100
4KO daf2	9	121	0	0			1	100
4KO daf2	13	115	6	6			0.950413	95.0413
4KO daf2	15	113	8	2			0.933884	93.3884
4KO daf2	17	106	15	7			0.876033	87.6033
4KO daf2	20	94	27	12			0.77686	77.686
4KO daf2	22	85	36	9			0.702479	70.2479
4KO daf2	24	77	44	8			0.636364	63.6364
4KO daf2	27	70	51	7			0.578512	57.8512
4KO daf2	29	57	64	13			0.471074	47.1074
4KO daf2	31	45	76	12			0.371901	37.1901
4KO daf2	34	29	92	16			0.239669	23.9669
4KO daf2	36	20	101	9			0.165289	16.5289
4KO daf2	38	14	107	6			0.115702	11.5702
4KO daf2	41	6	115	8			0.0495868	4.95868
4KO daf2	43	1	120	5			0.00826446	0.826446
4KO daf2	45	0	121	1			0	0
1OE daf2	0	109	0				1	100
1OE daf2	5	109	0				1	100
1OE daf2	7	109	0				1	100
1OE daf2	9	109	0				1	100
1OE daf2	13	109	0	0			1	100
1OE daf2	15	109	0	0			1	100
1OE daf2	17	105	4	4			0.963303	96.3303
1OE daf2	20	100	9	5			0.917431	91.7431
1OE daf2	22	94	15	6			0.862385	86.2385
1OE daf2	24	89	20	5			0.816514	81.6514
1OE daf2	27	84	25	5			0.770642	77.0642
1OE daf2	29	76	33	8			0.697248	69.7248
1OE daf2	31	64	45	12			0.587156	58.7156
1OE daf2	34	44	65	20			0.40367	40.367
1OE daf2	36	30	79	14			0.275229	27.5229
1OE daf2	38	14	95	16			0.12844	12.844
1OE daf2	41	8	101	6			0.0733945	7.33945
1OE daf2	43	0	109	8			0	0
1OE daf2	45	0	109				0	0
1KO daf2	0	117	0				1	100
1KO daf2	5	117	0				1	100
1KO daf2	7	117	0				1	100
1KO daf2	9	117	0				1	100
1KO daf2	13	112	5	5			0.957265	95.7265
1KO daf2	15	112	5	0			0.957265	95.7265
1KO daf2	17	110	7	2			0.940171	94.0171
1KO daf2	20	109	8	1			0.931624	93.1624
1KO daf2	22	107	10	2			0.91453	91.453
1KO daf2	24	104	13	3			0.888889	88.8889
1KO daf2	27	101	16	3			0.863248	86.3248
1KO daf2	29	92	25	9			0.786325	78.6325
1KO daf2	31	79	38	13			0.675214	67.5214
1KO daf2	34	49	68	30			0.418803	41.8803
1KO daf2	36	34	83	15			0.290598	29.0598
1KO daf2	38	21	96	13			0.179487	17.9487
1KO daf2	41	6	111	15			0.0512821	5.12821
1KO daf2	43	0	117	6			0	0
1KO daf2	45
N2 vhl1	0	122	0				1	100
N2 vhl1	5	122	0				1	100
N2 vhl1	7	122	0				1	100
N2 vhl1	9	122	0				1	100
N2 vhl1	13	118	4	4			0.967213	96.7213
N2 vhl1	15	118	4	0			0.967213	96.7213
N2 vhl1	17	116	6	2			0.95082	95.082
N2 vhl1	20	112	10	4			0.918033	91.8033
N2 vhl1	22	105	17	7			0.860656	86.0656
N2 vhl1	24	84	38	21			0.688525	68.8525
N2 vhl1	27	63	59	21			0.516393	51.6393
N2 vhl1	29	28	94	35			0.229508	22.9508
N2 vhl1	31	5	117	23			0.0409836	4.09836
N2 vhl1	34	1	121	4			0.00819672	0.819672
N2 vhl1	36	0	122	1			0	0
N2 vhl1	38	0	122				0	0
N2 vhl1	41	0	122				0	0
N2 vhl1	43	0	122				0	0
N2 vhl1	45	0	122				0	0
N2 vhl1	47	0	122				0	0
4OE vhl1	0	122	0				1	100
4OE vhl1	5	122	0				1	100
4OE vhl1	7	122	0				1	100
4OE vhl1	9	122	0				1	100
4OE vhl1	13	121	1	1			0.991803	99.1803
4OE vhl1	15	120	2	1			0.983607	98.3607
4OE vhl1	17	117	5	3			0.959016	95.9016
4OE vhl1	20	112	10	5			0.918033	91.8033
4OE vhl1	22	107	15	5			0.877049	87.7049
4OE vhl1	24	97	25	10			0.795082	79.5082
4OE vhl1	27	84	38	13			0.688525	68.8525
4OE vhl1	29	53	69	31			0.434426	43.4426
4OE vhl1	31	19	103	34			0.155738	15.5738
4OE vhl1	34	6	116	13			0.0491803	4.91803
4OE vhl1	36	3	119	3			0.0245902	2.45902
4OE vhl1	38	1	121	2			0.00854701	0.854701
4OE vhl1	41	0	122	1			0	0
4OE vhl1	43	0	122				0	0
	45
4KO vhl1	0	122	0				1	100
4KO vhl1	5	122	0				1	100
4KO vhl1	7	122	0				1	100
4KO vhl1	9	122	0				1	100
4KO vhl1	13	119	3	3			0.97541	97.541
4KO vhl1	15	116	6	3			0.95082	95.082
4KO vhl1	17	112	10	4			0.918033	91.8033
4KO vhl1	20	102	20	10			0.836066	83.6066
4KO vhl1	22	91	31	11			0.745902	74.5902
4KO vhl1	24	71	51	20			0.581967	58.1967
4KO vhl1	27	49	73	22			0.401639	40.1639
4KO vhl1	29	31	91	18			0.254098	25.4098
4KO vhl1	31	12	110	19			0.0983607	9.83607
4KO vhl1	34	1	121	11			0.00819672	0.819672
4KO vhl1	36	1	121	0			0.00819672	0.819672
4KO vhl1	38	0	122	1			0	0
4KO vhl1	41	0	122				0	0
4KO vhl1	43	0	122				0	0
4KO vhl1	45
1OE vhl1	0	114	0				1	100
1OE vhl1	5	114	0				1	100
1OE vhl1	7	114	0				1	100
1OE vhl1	9	114	0				1	100
1OE vhl1	13	108	6	6			0.947368	94.7368
1OE vhl1	15	107	7	1			0.938596	93.8596
1OE vhl1	17	102	12	5			0.894737	89.4737
1OE vhl1	20	90	24	12			0.789474	78.9474
1OE vhl1	22	80	34	10			0.701754	70.1754
1OE vhl1	24	68	46	12			0.596491	59.6491
1OE vhl1	27	50	64	18			0.438596	43.8596
1OE vhl1	29	21	93	29			0.184211	18.4211
1OE vhl1	31	10	104	11			0.0877193	8.77193
1OE vhl1	34	3	111	7			0.0263158	2.63158
1OE vhl1	36	1	113	2			0.00877193	0.877193
1OE vhl1	38	0	114	1			0	0
1OE vhl1	41	0	114				0	0
1OE vhl1	43	0	114				0	0
1OE vhl1	45
1KO vhl1	0	123	0				1	100
1KO vhl1	5	123	0				1	100
1KO vhl1	7	123	0				1	100
1KO vhl1	9	123	0				1	100
1KO vhl1	13	118	5	5			0.95935	95.935
1KO vhl1	15	117	6	1			0.95122	95.122
1KO vhl1	17	114	9	3			0.926829	92.6829
1KO vhl1	20	108	15	6			0.878049	87.8049
1KO vhl1	22	90	33	18			0.731707	73.1707
1KO vhl1	24	61	62	29			0.495935	49.5935
1KO vhl1	27	34	89	27			0.276423	27.6423
1KO vhl1	29	5	118	29			0.0406504	4.06504
1KO vhl1	31	0	123	5			0	0
1KO vhl1	34	0	123				0	0
1KO vhl1	36	0	123				0	0
1KO vhl1	38	0	123				0	0
1KO vhl1	41	0	123				0	0
1KO vhl1	43	0	123				0	0
1KO vhl1	45	0	123				0	0
n2 sams1	0	105	0				1	100
n2 sams1	5	105	0				1	100
n2 sams1	7	105	0				1	100
n2 sams1	9	105	0				1	100
n2 sams1	13	102	3	3			0.971429	97.1429
n2 sams1	15	99	6	3			0.942857	94.2857
n2 sams1	17	94	11	5			0.895238	89.5238
n2 sams1	20	83	22	11			0.790476	79.0476
n2 sams1	22	70	35	13			0.666667	66.6667
n2 sams1	24	50	55	20			0.47619	47.619
n2 sams1	27	30	75	20			0.285714	28.5714
n2 sams1	29	2	103	28			0.0190476	1.90476
n2 sams1	31	0	105	2			0	0
n2 sams1	34	0	105				0	0
n2 sams1	36	0	105				0	0
n2 sams1	38	0	105				0	0
n2 sams1	41	0	105				0	0
n2 sams1	43	0	105				0	0
n2 sams1	45
4OE sams1	0	102	0				1	100
4OE sams1	5	102	0				1	100
4OE sams1	7	102	0				1	100
4OE sams1	9	102	0				1	100
4OE sams1	13	99	3	3			0.970588	97.0588
4OE sams1	15	97	5	2			0.95098	95.098
4OE sams1	17	92	10	5			0.901961	90.1961
4OE sams1	20	79	23	13			0.77451	77.451
4OE sams1	22	55	47	24			0.539216	53.9216
4OE sams1	24	31	71	24			0.303922	30.3922
4OE sams1	27	7	95	24			0.0686275	6.86275
4OE sams1	29	0	102	7			0	0
4OE sams1	31	0	102				0	0
4OE sams1	34	0	102				0	0
4OE sams1	36	0	102				0	0
4OE sams1	38	0	102				0	0
4OE sams1	41	0	102				0	0
4OE sams1	43	0	102			0	0	0
4OE sams1	45
4KO sams1	0	83	0			0	1	100
4KO sams1	5	83	0			0	1	100
4KO sams1	7	83	0			0	1	100
4KO sams1	9	83	0			0	1	100
4KO sams1	13	77	6	6		0	0.927711	92.7711
4KO sams1	15	73	10	4		0	0.879518	87.9518
4KO sams1	17	58	25	15		0	0.698795	69.8795
4KO sams1	20	43	40	15		0	0.518072	51.8072
4KO sams1	22	29	54	14		0	0.349398	34.9398
4KO sams1	24	11	72	18		0	0.13253	13.253
4KO sams1	27	5	78	6		0	0.060241	6.0241
4KO sams1	29	1	82	4		0	0.0120482	1.20482
4KO sams1	31	0	83	1		0	0	0
4KO sams1	34	0	83			0	0	0
4KO sams1	36	0	83			0	0	0
4KO sams1	38	0	83			0	0	0
4KO sams1	41	0	83			0	0	0
4KO sams1	43	0	83			0	0	0
4KO sams1	45	134	0			0	1	100
1OE sams1	0	114	0			0	1	100
1OE sams1	5	114	0			0	1	100
1OE sams1	7	114	0			0	1	100
1OE sams1	9	114	0			0	1	100
1OE sams1	13	112	2	2		0	0.982456	98.2456
1OE sams1	15	111	3	1		0	0.973684	97.3684
1OE sams1	17	104	10	7		0	0.912281	91.2281
1OE sams1	20	95	19	9		0	0.833333	83.3333
1OE sams1	22	86	28	9		0	0.754386	75.4386
1OE sams1	24	70	44	16		0	0.614035	61.4035
1OE sams1	27	52	62	18		0	0.45614	45.614
1OE sams1	29	17	97	35		0	0.149123	14.9123
1OE sams1	31	3	111	14		0	0.0263158	2.63158
1OE sams1	34	0	114	3		0	0	0
1OE sams1	36	0	114			0	0	0
1OE sams1	38	0	114			0	0	0
1OE sams1	41	0	114			0	0	0
1OE sams1	43	114	0			0	1	100
1OE sams1	45	114	0			0	1	100
1KO sams1	0	83	0			0	1	100
1KO sams1	5	83	0			0	1	100
1KO sams1	7	83	0			0	1	100
1KO sams1	9	83	0			0	1	100
1KO sams1	13	75	8	8		0	0.903614	90.3614
1KO sams1	15	68	15	7		0	0.819277	81.9277
1KO sams1	17	55	28	13		0	0.662651	66.2651
1KO sams1	20	33	50	22		0	0.39759	39.759
1KO sams1	22	3	80	30		0	0.0361446	3.61446
1KO sams1	24	2	81	1		0	0.0240964	2.40964
1KO sams1	27	0	83	2		0	0	0
1KO sams1	29	0	83			0	0	0
1KO sams1	31	0	83			0	0	0
1KO sams1	34	0	83			0	0	0
1KO sams1	36	0	83			0	0	0
1KO sams1	38	0	83			0	0	0
1KO sams1	41	0	83			0	0	0
1KO sams1	43	0	83			0	0	0
1KO sams1	45	0	83			0	0	0
							0

## Sheet: vhl1 stats
% WT EV [119]						condition	chi	pvalue	corrected_pvalue
#days	dead	censored				WT EV v.s. fmo-4 OE EV	25.6	4.2e-07	2.1e-06
0						WT EV v.s. fmo-4 KO EV	0.81	0.3674	1
5						WT EV v.s. WT vhl	20.23	6.9e-06	3.4e-05
7						WT EV v.s. 4OE vhl1	55.76	0	0
10	0					WT EV v.s. fmo-4 KO vhl1	10.49	0.0012	0.006
13	5					fmo-4 OE EV v.s. WT EV	25.6	4.2e-07	2.1e-06
15	1					fmo-4 OE EV v.s. fmo-4 KO EV	28.12	1.1e-07	5.7e-07
17	4					fmo-4 OE EV v.s. WT vhl	3.32	0.0684	0.3421
20	11					fmo-4 OE EV v.s. 4OE vhl1	2.64	0.104	0.52
22	16					fmo-4 OE EV v.s. fmo-4 KO vhl1	3.4	0.0652	0.3262
24	20					fmo-4 KO EV v.s. WT EV	0.81	0.3674	1
27	35					fmo-4 KO EV v.s. fmo-4 OE EV	28.12	1.1e-07	5.7e-07
29	17					fmo-4 KO EV v.s. WT vhl	24.97	5.8e-07	2.9e-06
31	9					fmo-4 KO EV v.s. 4OE vhl1	58.94	0	0
34	1					fmo-4 KO EV v.s. fmo-4 KO vhl1	13.77	0.0002	0.001
36						WT vhl v.s. WT EV	20.23	6.9e-06	3.4e-05
38						WT vhl v.s. fmo-4 OE EV	3.32	0.0684	0.3421
41						WT vhl v.s. fmo-4 KO EV	24.97	5.8e-07	2.9e-06
43						WT vhl v.s. 4OE vhl1	14.77	0.0001	0.0006
45						WT vhl v.s. fmo-4 KO vhl1	0.16	0.6861	1
						4OE vhl1 v.s. WT EV	55.76	0	0
% fmo-4 OE EV [113]						4OE vhl1 v.s. fmo-4 OE EV	2.64	0.104	0.52
#days	dead	censored				4OE vhl1 v.s. fmo-4 KO EV	58.94	0	0
0						4OE vhl1 v.s. WT vhl	14.77	0.0001	0.0006
5						4OE vhl1 v.s. fmo-4 KO vhl1	13.98	0.0002	0.0009
7						fmo-4 KO vhl1 v.s. WT EV	10.49	0.0012	0.006
10	0					fmo-4 KO vhl1 v.s. fmo-4 OE EV	3.4	0.0652	0.3262
13	7					fmo-4 KO vhl1 v.s. fmo-4 KO EV	13.77	0.0002	0.001
15	3					fmo-4 KO vhl1 v.s. WT vhl	0.16	0.6861	1
17	6					fmo-4 KO vhl1 v.s. 4OE vhl1	13.98	0.0002	0.0009
20	6
22	4
24	10
27	15
29	24
31	19
34	16
36	1
38	2
41
43
45
% fmo-4 KO EV [87]
#days	dead	censored
0
5
7
10	0
13	6
15	5
17	5
20	4
22	8
24	19
27	20
29	16
31	4
34
36
38
41
43
45
% WT vhl [122]
#days	dead	censored
0
5
7
10
13	4
15	0
17	2
20	4
22	7
24	21
27	21
29	35
31	23
34	4
36	1
38
41
43
45
% 4OE vhl1 [122]
#days	dead	censored
0
5
7
10
13	1
15	1
17	3
20	5
22	5
24	10
27	13
29	31
31	34
34	13
36	3
38	2
41	1
43
45
% fmo-4 KO vhl1 [122]
#days	dead	censored
0
5
7
10
13	3
15	3
17	4
20	10
22	11
24	20
27	22
29	18
31	19
34	11
36	0
38	1
41
43
45

## Sheet: daf2 stats
% WT EV [119]					condition	chi	pvalue	corrected_pvalue
#days	dead	censored			WT EV v.s. fmo-4 OE EV	25.6	4.2e-07	2.1e-06
0					WT EV v.s. fmo-4 KO EV	0.81	0.3674	1
5					WT EV v.s. WT daf2	145.16	0	0
7					WT EV v.s. 4OE daf2	187.13	0	0
10	0				WT EV v.s. fmo-4 KO daf2	39.59	0	0
13	5				fmo-4 OE EV v.s. WT EV	25.6	4.2e-07	2.1e-06
15	1				fmo-4 OE EV v.s. fmo-4 KO EV	28.12	1.1e-07	5.7e-07
17	4				fmo-4 OE EV v.s. WT daf2	75.85	0	0
20	11				fmo-4 OE EV v.s. 4OE daf2	111.08	0	0
22	16				fmo-4 OE EV v.s. fmo-4 KO daf2	12.34	0.0004	0.0022
24	20				fmo-4 KO EV v.s. WT EV	0.81	0.3674	1
27	35				fmo-4 KO EV v.s. fmo-4 OE EV	28.12	1.1e-07	5.7e-07
29	17				fmo-4 KO EV v.s. WT daf2	136.89	0	0
31	9				fmo-4 KO EV v.s. 4OE daf2	178.14	0	0
34	1				fmo-4 KO EV v.s. fmo-4 KO daf2	38.06	0	0
36					WT daf2 v.s. WT EV	145.16	0	0
38					WT daf2 v.s. fmo-4 OE EV	75.85	0	0
41					WT daf2 v.s. fmo-4 KO EV	136.89	0	0
43					WT daf2 v.s. 4OE daf2	5.99	0.0144	0.0721
45					WT daf2 v.s. fmo-4 KO daf2	10.01	0.0016	0.0078
					4OE daf2 v.s. WT EV	187.13	0	0
% fmo-4 OE EV [113]					4OE daf2 v.s. fmo-4 OE EV	111.08	0	0
#days	dead	censored			4OE daf2 v.s. fmo-4 KO EV	178.14	0	0
0					4OE daf2 v.s. WT daf2	5.99	0.0144	0.0721
5					4OE daf2 v.s. fmo-4 KO daf2	26.68	2.4e-07	1.2e-06
7					fmo-4 KO daf2 v.s. WT EV	39.59	0	0
10	0				fmo-4 KO daf2 v.s. fmo-4 OE EV	12.34	0.0004	0.0022
13	7				fmo-4 KO daf2 v.s. fmo-4 KO EV	38.06	0	0
15	3				fmo-4 KO daf2 v.s. WT daf2	10.01	0.0016	0.0078
17	6				fmo-4 KO daf2 v.s. 4OE daf2	26.68	2.4e-07	1.2e-06
20	6
22	4
24	10
27	15
29	24
31	19
34	16
36	1
38	2
41
43
45
% fmo-4 KO EV [87]
#days	dead	censored
0
5
7
10	0
13	6
15	5
17	5
20	4
22	8
24	19
27	20
29	16
31	4
34
36
38
41
43
45
% WT daf2 [109]
#days	dead	censored
0
5
7
10
13	2
15	0
17	0
20	1
22	2
24	5
27	4
29	11
31	10
34	26
36	21
38	15
41	7
43	5
45
% 4OE daf2 [116]
#days	dead	censored
0
5
7
10	0
13	0
15	0
17	0
20	1
22	2
24	2
27	3
29	9
31	10
34	30
36	18
38	10
41	21
43	9
45	1
% fmo-4 KO daf2 [121]
#days	dead	censored
0
5
7
10	0
13	6
15	2
17	7
20	12
22	9
24	8
27	7
29	13
31	12
34	16
36	9
38	6
41	8
43	5
45	1

## Sheet: Sheet1
#1	N2								#1	N2					#1	N2
#2	Lei42	fmo-2p::MC; unc-119p::HIF-1(P621A); JT307 #1							#2	Lei42	fmo-2p::MC; unc-119p::HIF-1(P621A); JT307 #1				#11L	Lei51	fmo-2p::MC; JT307; gcy-31; gcy-36 - XA2262 sibling #1
#3	Lei43	fmo-2p::MC; unc-119p::HIF-1(P621A); JT307 #2							#3	Lei43	fmo-2p::MC; unc-119p::HIF-1(P621A); JT307 #2				#12L	Lei52	fmo-2p::MC; JT307; gcy-33; gcy-36 - XA2262 sibling #1
#4	Lei44	fmo-2p::MC; TU3311; CB5602 #1							#4	Lei44	fmo-2p::MC; TU3311; CB5602 #1				#13	Lei53	fmo-2p::MC; JT307; gcy-33; gcy-36 - XA2262 sibling #2
#5	Lei45	fmo-2p::MC; TU3311 #1							#5	Lei45	fmo-2p::MC; TU3311 #1				#14L	Lei55	fmo-2p::MC; JT307 - XA2262 sibling #1
#6	Lei46	fmo-2p::MC; CB5602 #1							#6	Lei46	fmo-2p::MC; CB5602 #1				#15L	Lei56	fmo-2p::MC; JT307 - XA2262 sibling #2
#7	Lei47	fmo-2p::MC; TU3311; CB5602 #2							#7	Lei47	fmo-2p::MC; TU3311; CB5602 #2				#16	Lei57	fmo-2p::MC - XA2262 sibling #1
#8L	Lei48	fmo-2p::MC; JT307; XA2262 #1													#17	Lei58	fmo-2p::MC - XA2262 sibling #2
#9	Lei49	fmo-2p::MC; JT307; XA2262 #2													#18	Lei59	fmo-2p::MC; gcy-33; gcy-36 - XA2262 sibling #1
#10L	Lei50	fmo-2p::MC; JT307; XA2262 #3							#1	N2					#19	Lei60	fmo-2p::MC; gcy-33; gcy-36 - XA2262 sibling #2
#11L	Lei51	fmo-2p::MC; JT307; gcy-31; gcy-36 - XA2262 sibling #1							#8L	Lei48	fmo-2p::MC; JT307; XA2262 #1
#12L	Lei52	fmo-2p::MC; JT307; gcy-33; gcy-36 - XA2262 sibling #1							#9	Lei49	fmo-2p::MC; JT307; XA2262 #2
#13	Lei53	fmo-2p::MC; JT307; gcy-33; gcy-36 - XA2262 sibling #2							#10L	Lei50	fmo-2p::MC; JT307; XA2262 #3
#14L	Lei55	fmo-2p::MC; JT307 - XA2262 sibling #1							#14L	Lei55	fmo-2p::MC; JT307 - XA2262 sibling #1
#15L	Lei56	fmo-2p::MC; JT307 - XA2262 sibling #2							#15L	Lei56	fmo-2p::MC; JT307 - XA2262 sibling #2
#16	Lei57	fmo-2p::MC - XA2262 sibling #1							#16	Lei57	fmo-2p::MC - XA2262 sibling #1
#17	Lei58	fmo-2p::MC - XA2262 sibling #2							#17	Lei58	fmo-2p::MC - XA2262 sibling #2
#18	Lei59	fmo-2p::MC; gcy-33; gcy-36 - XA2262 sibling #1							#20	Lei61	fmo-2p::MC; XA2262 #1
#19	Lei60	fmo-2p::MC; gcy-33; gcy-36 - XA2262 sibling #2							#21	Lei62	fmo-2p::MC; XA2262 #2
#20	Lei61	fmo-2p::MC; XA2262 #1
#21	Lei62	fmo-2p::MC; XA2262 #2
