# Supplementary material for: fmo-4 promotes longevity and stress resistance via ER to mitochondria calcium regulation in C. elegans
Source: eLife journal article supplement (doi:10.7554/elife.99971), 2024-08-27
Supplement: fig1-data3 [file 09.18.2023 cyc-1 and vhl-1 RNAi lifespan.xlsx]

## Sheet: lifespan
strain	day	alive	dead-total	dead-normal	dead-ruptured	censored	ratio-alive	percentage-alive
N2 EV	0	121	0				1	100
N2 EV	5	121	0				1	100
N2 EV	7	121	0				1	100						1	2	3	4	5	6	7	8	9	10	11	12	13	14	15
N2 EV	10	121	0	0			1	100			plot data here-->		day	Wild-Type	FMO-4 OE	FMO-4 KO	WT; cyc-1 RNAi	FMO-4OE; cyc-1 RNAi	FMO-4KO; cyc-1 RNAi	Wild-Type; vhl-1 RNAi	FMO-4OE; vhl-1 RNAi	FMO-4 KO; vhl-1 RNAi
N2 EV	14	118	3	3			0.975207	97.5207				0	0	100	100	100	100	100	100	100	100	100
N2 EV	16	113	8	5			0.933884	93.3884				5	5	100	100	100	100	100	100	100	100	100
N2 EV	18	95	26	18			0.785124	78.5124				7	7	100	100	100	100	100	100	100	100	100
N2 EV	21	71	50	24			0.586777	58.6777				10	10	100	100	100	100	100	100	100	100	100
N2 EV	23	45	76	26			0.371901	37.1901				14	14	97.5207	99.1597	96.6667	99.1667	100	100	100	100	99.1667
N2 EV	25	27	94	18			0.22314	22.314				16	16	93.3884	94.958	89.1667	97.5	97.4576	98.3193	96.5217	96.6387	96.6667
N2 EV	28	13	108	14			0.107438	10.7438				18	18	78.5124	89.916	75.8333	95.8333	96.6102	96.6387	95.6522	94.958	93.3333
N2 EV	30	4	117	9			0.0330579	3.30579				21	21	58.6777	81.5126	59.1667	92.5	94.0678	91.5966	87.8261	86.5546	84.1667
N2 EV	32	0	121	4			0	0				23	23	37.1901	66.3866	35.8333	80	83.8983	80.6723	75.6522	72.2689	65
N2 EV	35	0	121				0	0				25	25	22.314	47.0588	21.6667	65.8333	66.9492	67.2269	59.1304	52.9412	43.3333
N2 EV	37	0	121				0	0				28	28	10.7438	30.2521	10	51.6667	53.3898	49.5798	38.2609	34.4538	26.6667
N2 EV	39	0	121				0	0				30	30	3.30579	21.8487	3.33333	34.1667	43.2203	36.9748	27.8261	22.6891	20
N2 EV	42	0	121				0	0				32	32	0	11.7647	0	21.6667	24.5763	25.2101	17.3913	15.9664	13.3333
N2 EV	44	0	121				0	0				35	35		6.72269		11.6667	12.7119	20.1681	8.69565	9.2437	10.8333
N2 EV	46	0	121				0	0				37	37		4.20168		5	8.47458	10.9244	3.47826	4.20168	5.83333
												39	39		1.68067		1.66667	3.38983	2.52101	1.73913	0.840336	4.16667
4OE EV	0	119	0				1	100				42	42		0		0	0	0	0	0	2.5
4OE EV	5	119	0				1	100				44	44									0
4OE EV	7	119	0				1	100				46	46
4OE EV	10	119	0	0			1	100
4OE EV	14	118	1	1			0.991597	99.1597
4OE EV	16	113	6	5			0.94958	94.958
4OE EV	18	107	12	6			0.89916	89.916
4OE EV	21	97	22	10			0.815126	81.5126
4OE EV	23	79	40	18			0.663866	66.3866
4OE EV	25	56	63	23			0.470588	47.0588
4OE EV	28	36	83	20			0.302521	30.2521
4OE EV	30	26	93	10			0.218487	21.8487
4OE EV	32	14	105	12			0.117647	11.7647
4OE EV	35	8	111	6			0.0672269	6.72269
4OE EV	37	5	114	3			0.0420168	4.20168
4OE EV	39	2	117	3			0.0168067	1.68067
4OE EV	42	0	119	2			0	0
4OE EV	44	0	119				0	0
4OE EV	46	0	119				0	0
4KO EV	0	120	0				1	100
4KO EV	5	120	0				1	100
4KO EV	7	120	0				1	100
4KO EV	10	120	0	0			1	100
4KO EV	14	116	4	4			0.966667	96.6667
4KO EV	16	107	13	9			0.891667	89.1667
4KO EV	18	91	29	16			0.758333	75.8333
4KO EV	21	71	49	20			0.591667	59.1667
4KO EV	23	43	77	28			0.358333	35.8333
4KO EV	25	26	94	17			0.216667	21.6667
4KO EV	28	12	108	14			0.1	10
4KO EV	30	4	116	8			0.0333333	3.33333
4KO EV	32	0	120	4			0	0
4KO EV	35	0	120				0	0
4KO EV	37	0	120				0	0
4KO EV	39	0	120				0	0
4KO EV	42	0	120				0	0
4KO EV	44	0	120				0	0
4KO EV	46	0	120				0	0
N2 cyc-1	0	120	0				1	100
N2 cyc-1	5	120	0				1	100
N2 cyc-1	7	120	0				1	100
N2 cyc-1	10	120	0	0			1	100
N2 cyc-1	14	119	1	1			0.991667	99.1667
N2 cyc-1	16	117	3	2			0.975	97.5
N2 cyc-1	18	115	5	2			0.958333	95.8333
N2 cyc-1	21	111	9	4			0.925	92.5
N2 cyc-1	23	96	24	15			0.8	80
N2 cyc-1	25	79	41	17			0.658333	65.8333
N2 cyc-1	28	62	58	17			0.516667	51.6667
N2 cyc-1	30	41	79	21			0.341667	34.1667
N2 cyc-1	32	26	94	15			0.216667	21.6667
N2 cyc-1	35	14	106	12			0.116667	11.6667
N2 cyc-1	37	6	114	8			0.05	5
N2 cyc-1	39	2	118	4			0.0166667	1.66667
N2 cyc-1	42	0	120	2			0	0
N2 cyc-1	44	0	120				0	0
N2 cyc-1	46	0	120				0	0
4OE cyc-1	0	118	0				1	100
4OE cyc-1	5	118	0				1	100
4OE cyc-1	7	118	0				1	100
4OE cyc-1	10	118	0	0			1	100
4OE cyc-1	14	118	0	0			1	100
4OE cyc-1	16	115	3	3			0.974576	97.4576
4OE cyc-1	18	114	4	1			0.966102	96.6102
4OE cyc-1	21	111	7	3			0.940678	94.0678
4OE cyc-1	23	99	19	12			0.838983	83.8983
4OE cyc-1	25	79	39	20			0.669492	66.9492
4OE cyc-1	28	63	55	16			0.533898	53.3898
4OE cyc-1	30	51	67	12			0.432203	43.2203
4OE cyc-1	32	29	89	22			0.245763	24.5763
4OE cyc-1	35	15	103	14			0.127119	12.7119
4OE cyc-1	37	10	108	5			0.0847458	8.47458
4OE cyc-1	39	4	114	6			0.0338983	3.38983
4OE cyc-1	42	0	118	4			0	0
4OE cyc-1	44	0	118				0	0
4OE cyc-1	46	0	118				0	0
4KO cyc-1	0	119	0				1	100
4KO cyc-1	5	119	0				1	100
4KO cyc-1	7	119	0				1	100
4KO cyc-1	10	119	0	0			1	100
4KO cyc-1	14	119	0	0			1	100
4KO cyc-1	16	117	2	2			0.983193	98.3193
4KO cyc-1	18	115	4	2			0.966387	96.6387
4KO cyc-1	21	109	10	6			0.915966	91.5966
4KO cyc-1	23	96	23	13			0.806723	80.6723
4KO cyc-1	25	80	39	16			0.672269	67.2269
4KO cyc-1	28	59	60	21			0.495798	49.5798
4KO cyc-1	30	44	75	15			0.369748	36.9748
4KO cyc-1	32	30	89	14			0.252101	25.2101
4KO cyc-1	35	24	95	6			0.201681	20.1681
4KO cyc-1	37	13	106	11			0.109244	10.9244
4KO cyc-1	39	3	116	10			0.0252101	2.52101
4KO cyc-1	42	0	119	3			0	0
4KO cyc-1	44	0	119				0	0
4KO cyc-1	46	0	119				0	0
N2 vhl-1	0	115	0				1	100
N2 vhl-1	5	115	0				1	100
N2 vhl-1	7	115	0				1	100
N2 vhl-1	10	115	0	0			1	100
N2 vhl-1	14	115	0	0			1	100
N2 vhl-1	16	111	4	4			0.965217	96.5217
N2 vhl-1	18	110	5	1			0.956522	95.6522
N2 vhl-1	21	101	14	9			0.878261	87.8261
N2 vhl-1	23	87	28	14			0.756522	75.6522
N2 vhl-1	25	68	47	19			0.591304	59.1304
N2 vhl-1	28	44	71	24			0.382609	38.2609
N2 vhl-1	30	32	83	12			0.278261	27.8261
N2 vhl-1	32	20	95	12			0.173913	17.3913
N2 vhl-1	35	10	105	10			0.0869565	8.69565
N2 vhl-1	37	4	111	6			0.0347826	3.47826
N2 vhl-1	39	2	113	2			0.0173913	1.73913
N2 vhl-1	42	0	115	2			0	0
N2 vhl-1	44	0	115				0	0
N2 vhl-1	46	0	115				0	0
4OE vhl-1	0	119	0				1	100
4OE vhl-1	5	119	0				1	100
4OE vhl-1	7	119	0				1	100
4OE vhl-1	10	119	0	0			1	100
4OE vhl-1	14	119	0	0			1	100
4OE vhl-1	16	115	4	4			0.966387	96.6387
4OE vhl-1	18	113	6	2			0.94958	94.958
4OE vhl-1	21	103	16	10			0.865546	86.5546
4OE vhl-1	23	86	33	17			0.722689	72.2689
4OE vhl-1	25	63	56	23			0.529412	52.9412
4OE vhl-1	28	41	78	22			0.344538	34.4538
4OE vhl-1	30	27	92	14			0.226891	22.6891
4OE vhl-1	32	19	100	8			0.159664	15.9664
4OE vhl-1	35	11	108	8			0.092437	9.2437
4OE vhl-1	37	5	114	6			0.0420168	4.20168
4OE vhl-1	39	1	118	4			0.00840336	0.840336
4OE vhl-1	42	0	119	1			0	0
4OE vhl-1	44	0	119				0	0
4OE vhl-1	46
4KO vhl-1	0	120	0				1	100
4KO vhl-1	5	120	0				1	100
4KO vhl-1	7	120	0				1	100
4KO vhl-1	10	120	0	0			1	100
4KO vhl-1	14	119	1	1			0.991667	99.1667
4KO vhl-1	16	116	4	3			0.966667	96.6667
4KO vhl-1	18	112	8	4			0.933333	93.3333
4KO vhl-1	21	101	19	11			0.841667	84.1667
4KO vhl-1	23	78	42	23			0.65	65
4KO vhl-1	25	52	68	26			0.433333	43.3333
4KO vhl-1	28	32	88	20			0.266667	26.6667
4KO vhl-1	30	24	96	8			0.2	20
4KO vhl-1	32	16	104	8			0.133333	13.3333
4KO vhl-1	35	13	107	3			0.108333	10.8333
4KO vhl-1	37	7	113	6			0.0583333	5.83333
4KO vhl-1	39	5	115	2			0.0416667	4.16667
4KO vhl-1	42	3	117	2			0.025	2.5
4KO vhl-1	44	0	120	3			0	0
4KO vhl-1	46	0	120				0	0
4KO vhl-1	47	0	120				0	0

## Sheet: vhl1 stats
% WT EV [121]						condition	chi	pvalue	corrected_pvalue
#days	dead	censored				WT EV v.s. fmo-4 OE EV	31.02	2.6e-08	1.3e-07
0						WT EV v.s. fmo-4 KO EV	0.06	0.809	1
5						WT EV v.s. WT vhl	53.12	0	0
7						WT EV v.s. 4OE vhl1	43.64	0	0
10	0					WT EV v.s. fmo-4 KO vhl1	29.7	5.1e-08	2.5e-07
14	3					fmo-4 OE EV v.s. WT EV	31.02	2.6e-08	1.3e-07
16	5					fmo-4 OE EV v.s. fmo-4 KO EV	32.74	1.1e-08	5.3e-08
18	18					fmo-4 OE EV v.s. WT vhl	2.16	0.142	0.71
21	24					fmo-4 OE EV v.s. 4OE vhl1	0.66	0.4161	1
23	26					fmo-4 OE EV v.s. fmo-4 KO vhl1	0.15	0.6966	1
25	18					fmo-4 KO EV v.s. WT EV	0.06	0.809	1
28	14					fmo-4 KO EV v.s. fmo-4 OE EV	32.74	1.1e-08	5.3e-08
30	9					fmo-4 KO EV v.s. WT vhl	55.01	0	0
32	4					fmo-4 KO EV v.s. 4OE vhl1	45.56	0	0
35						fmo-4 KO EV v.s. fmo-4 KO vhl1	31.37	2.1e-08	1.1e-07
37						WT vhl v.s. WT EV	53.12	0	0
39						WT vhl v.s. fmo-4 OE EV	2.16	0.142	0.71
42						WT vhl v.s. fmo-4 KO EV	55.01	0	0
44						WT vhl v.s. 4OE vhl1	0.39	0.53	1
46						WT vhl v.s. fmo-4 KO vhl1	1	0.3163	1
						4OE vhl1 v.s. WT EV	43.64	0	0
% fmo-4 OE EV [119]						4OE vhl1 v.s. fmo-4 OE EV	0.66	0.4161	1
#days	dead	censored				4OE vhl1 v.s. fmo-4 KO EV	45.56	0	0
0						4OE vhl1 v.s. WT vhl	0.39	0.53	1
5						4OE vhl1 v.s. fmo-4 KO vhl1	0.17	0.6762	1
7						fmo-4 KO vhl1 v.s. WT EV	29.7	5.1e-08	2.5e-07
10	0					fmo-4 KO vhl1 v.s. fmo-4 OE EV	0.15	0.6966	1
14	1					fmo-4 KO vhl1 v.s. fmo-4 KO EV	31.37	2.1e-08	1.1e-07
16	5					fmo-4 KO vhl1 v.s. WT vhl	1	0.3163	1
18	6					fmo-4 KO vhl1 v.s. 4OE vhl1	0.17	0.6762	1
21	10
23	18
25	23
28	20
30	10
32	12
35	6
37	3
39	3
42	2
44
46
% fmo-4 KO EV [120]
#days	dead	censored
0
5
7
10	0
14	4
16	9
18	16
21	20
23	28
25	17
28	14
30	8
32	4
35
37
39
42
44
46
% WT vhl [115]
#days	dead	censored
0
5
7
10	0
14	0
16	4
18	1
21	9
23	14
25	19
28	24
30	12
32	12
35	10
37	6
39	2
42	2
44
46
% 4OE vhl1 [119]
#days	dead	censored
0
5
7
10	0
14	0
16	4
18	2
21	10
23	17
25	23
28	22
30	14
32	8
35	8
37	6
39	4
42	1
44
46
% fmo-4 KO vhl1 [120]
#days	dead	censored
0
5
7
10	0
14	1
16	3
18	4
21	11
23	23
25	26
28	20
30	8
32	8
35	3
37	6
39	2
42	2
44	3
46

## Sheet: cyc1 stats
% WT EV [121]					condition	chi	pvalue	corrected_pvalue
#days	dead	censored			WT EV v.s. fmo-4 OE EV	31.02	2.6e-08	1.3e-07
0					WT EV v.s. fmo-4 KO EV	0.06	0.809	1
5					WT EV v.s. WT cyc1	75.8	0	0
7					WT EV v.s. fmo-4 OE cyc1	87.19	0	0
10	0				WT EV v.s. fmo-4 ko cyc1	78.21	0	0
14	3				fmo-4 OE EV v.s. WT EV	31.02	2.6e-08	1.3e-07
16	5				fmo-4 OE EV v.s. fmo-4 KO EV	32.74	1.1e-08	5.3e-08
18	18				fmo-4 OE EV v.s. WT cyc1	7.49	0.0062	0.031
21	24				fmo-4 OE EV v.s. fmo-4 OE cyc1	12.93	0.0003	0.0016
23	26				fmo-4 OE EV v.s. fmo-4 ko cyc1	11.98	0.0005	0.0027
25	18				fmo-4 KO EV v.s. WT EV	0.06	0.809	1
28	14				fmo-4 KO EV v.s. fmo-4 OE EV	32.74	1.1e-08	5.3e-08
30	9				fmo-4 KO EV v.s. WT cyc1	77.82	0	0
32	4				fmo-4 KO EV v.s. fmo-4 OE cyc1	89.08	0	0
35					fmo-4 KO EV v.s. fmo-4 ko cyc1	80.17	0	0
37					WT cyc1 v.s. WT EV	75.8	0	0
39					WT cyc1 v.s. fmo-4 OE EV	7.49	0.0062	0.031
42					WT cyc1 v.s. fmo-4 KO EV	77.82	0	0
44					WT cyc1 v.s. fmo-4 OE cyc1	1.03	0.3103	1
46					WT cyc1 v.s. fmo-4 ko cyc1	1.09	0.2974	1
					fmo-4 OE cyc1 v.s. WT EV	87.19	0	0
% fmo-4 OE EV [119]					fmo-4 OE cyc1 v.s. fmo-4 OE EV	12.93	0.0003	0.0016
#days	dead	censored			fmo-4 OE cyc1 v.s. fmo-4 KO EV	89.08	0	0
0					fmo-4 OE cyc1 v.s. WT cyc1	1.03	0.3103	1
5					fmo-4 OE cyc1 v.s. fmo-4 ko cyc1	0	0.9927	1
7					fmo-4 ko cyc1 v.s. WT EV	78.21	0	0
10	0				fmo-4 ko cyc1 v.s. fmo-4 OE EV	11.98	0.0005	0.0027
14	1				fmo-4 ko cyc1 v.s. fmo-4 KO EV	80.17	0	0
16	5				fmo-4 ko cyc1 v.s. WT cyc1	1.09	0.2974	1
18	6				fmo-4 ko cyc1 v.s. fmo-4 OE cyc1	0	0.9927	1
21	10
23	18
25	23
28	20
30	10
32	12
35	6
37	3
39	3
42	2
44
46
% fmo-4 KO EV [120]
#days	dead	censored
0
5
7
10	0
14	4
16	9
18	16
21	20
23	28
25	17
28	14
30	8
32	4
35
37
39
42
44
46
% WT cyc1 [120]
#days	dead	censored
0
5
7
10	0
14	1
16	2
18	2
21	4
23	15
25	17
28	17
30	21
32	15
35	12
37	8
39	4
42	2
44
46
% fmo-4 OE cyc1 [118]
#days	dead	censored
0
5
7
10	0
14	0
16	3
18	1
21	3
23	12
25	20
28	16
30	12
32	22
35	14
37	5
39	6
42	4
44
46
% fmo-4 ko cyc1 [119]
#days	dead	censored
0
5
7
10	0
14	0
16	2
18	2
21	6
23	13
25	16
28	21
30	15
32	14
35	6
37	11
39	10
42	3
44
46

## Sheet: Sheet1
#1	N2								#1	N2					#1	N2
#2	Lei42	fmo-2p::MC; unc-119p::HIF-1(P621A); JT307 #1							#2	Lei42	fmo-2p::MC; unc-119p::HIF-1(P621A); JT307 #1				#11L	Lei51	fmo-2p::MC; JT307; gcy-31; gcy-36 - XA2262 sibling #1
#3	Lei43	fmo-2p::MC; unc-119p::HIF-1(P621A); JT307 #2							#3	Lei43	fmo-2p::MC; unc-119p::HIF-1(P621A); JT307 #2				#12L	Lei52	fmo-2p::MC; JT307; gcy-33; gcy-36 - XA2262 sibling #1
#4	Lei44	fmo-2p::MC; TU3311; CB5602 #1							#4	Lei44	fmo-2p::MC; TU3311; CB5602 #1				#13	Lei53	fmo-2p::MC; JT307; gcy-33; gcy-36 - XA2262 sibling #2
#5	Lei45	fmo-2p::MC; TU3311 #1							#5	Lei45	fmo-2p::MC; TU3311 #1				#14L	Lei55	fmo-2p::MC; JT307 - XA2262 sibling #1
#6	Lei46	fmo-2p::MC; CB5602 #1							#6	Lei46	fmo-2p::MC; CB5602 #1				#15L	Lei56	fmo-2p::MC; JT307 - XA2262 sibling #2
#7	Lei47	fmo-2p::MC; TU3311; CB5602 #2							#7	Lei47	fmo-2p::MC; TU3311; CB5602 #2				#16	Lei57	fmo-2p::MC - XA2262 sibling #1
#8L	Lei48	fmo-2p::MC; JT307; XA2262 #1													#17	Lei58	fmo-2p::MC - XA2262 sibling #2
#9	Lei49	fmo-2p::MC; JT307; XA2262 #2													#18	Lei59	fmo-2p::MC; gcy-33; gcy-36 - XA2262 sibling #1
#10L	Lei50	fmo-2p::MC; JT307; XA2262 #3							#1	N2					#19	Lei60	fmo-2p::MC; gcy-33; gcy-36 - XA2262 sibling #2
#11L	Lei51	fmo-2p::MC; JT307; gcy-31; gcy-36 - XA2262 sibling #1							#8L	Lei48	fmo-2p::MC; JT307; XA2262 #1
#12L	Lei52	fmo-2p::MC; JT307; gcy-33; gcy-36 - XA2262 sibling #1							#9	Lei49	fmo-2p::MC; JT307; XA2262 #2
#13	Lei53	fmo-2p::MC; JT307; gcy-33; gcy-36 - XA2262 sibling #2							#10L	Lei50	fmo-2p::MC; JT307; XA2262 #3
#14L	Lei55	fmo-2p::MC; JT307 - XA2262 sibling #1							#14L	Lei55	fmo-2p::MC; JT307 - XA2262 sibling #1
#15L	Lei56	fmo-2p::MC; JT307 - XA2262 sibling #2							#15L	Lei56	fmo-2p::MC; JT307 - XA2262 sibling #2
#16	Lei57	fmo-2p::MC - XA2262 sibling #1							#16	Lei57	fmo-2p::MC - XA2262 sibling #1
#17	Lei58	fmo-2p::MC - XA2262 sibling #2							#17	Lei58	fmo-2p::MC - XA2262 sibling #2
#18	Lei59	fmo-2p::MC; gcy-33; gcy-36 - XA2262 sibling #1							#20	Lei61	fmo-2p::MC; XA2262 #1
#19	Lei60	fmo-2p::MC; gcy-33; gcy-36 - XA2262 sibling #2							#21	Lei62	fmo-2p::MC; XA2262 #2
#20	Lei61	fmo-2p::MC; XA2262 #1
#21	Lei62	fmo-2p::MC; XA2262 #2
