# Supplementary material for: fmo-4 promotes longevity and stress resistance via ER to mitochondria calcium regulation in C. elegans
Source: eLife journal article supplement (doi:10.7554/elife.99971), 2024-08-27
Supplement: fig1-data3 [file elife-99971-fig1-data3-v1.zip]

## Sheet: lifespan
strain	day	alive	dead-total	dead-normal	dead-ruptured	censored	ratio-alive	percentage-alive
N2 EV	0	117	0				1	100
N2 EV	5	117	0				1	100
N2 EV	7	117	0				1	100						1	2	3	4	5	6	7	8	9	10	11	12	13	14	15
N2 EV	10	117	0	0			1	100			plot data here-->		day	Wild-Type	FMO-4 OE	FMO-4 KO	WT; daf-2 RNAi	FMO-4OE; daf-2 RNAi	FMO-4KO; daf-2 RNAi	Wild-Type; vhl-1 RNAi	FMO-4OE; vhl-1 RNAi	FMO-4 KO; vhl-1 RNAi	WT; clk-1 RNAi	FMO-4 OE; clk-1 RNAi	FMO-4 KO; clk-1 RNAi	WT; atf-6 RNAi	FMO-4 OE; atf-6 RNAi	FMO-4 KO; atf-6 RNAi
N2 EV	14	109	8	8			0.931624	93.1624				0	0	100	100	100	100	100	100	100	100	100	100	100	100	100	100	100
N2 EV	16	101	16	8			0.863248	86.3248				5	5	100	100	100	100	100	100	100	100	100	100	100	100	100	100	100
N2 EV	18	88	29	13			0.752137	75.2137				7	7	100	100	100	100	100	100	100	100	100	100	100	100	100	100	100
N2 EV	21	74	43	14			0.632479	63.2479				10	10	100	100	100	100	100	100	100	100	100	100	100	100	100	100	100
N2 EV	23	31	86	43			0.264957	26.4957				14	14	93.1624	98.2301	94.2308	98.3471	97.1963	98.4127	96.0784	100	93.9655	98.0392	95.7265	90.9091	96.5812	96.4602	95.8678
N2 EV	25	16	101	15			0.136752	13.6752				16	16	86.3248	92.9204	86.5385	98.3471	94.3925	96.8254	93.1373	97.3451	88.7931	92.1569	88.8889	83.4711	94.0171	92.9204	90.0826
N2 EV	28	7	110	9			0.0598291	5.98291				18	18	75.2137	88.4956	75.9615	95.8678	91.5888	93.6508	91.1765	92.0354	81.8966	82.3529	81.1966	75.2066	88.8889	87.6106	84.2975
N2 EV	30	0	117	7			0	0				21	21	63.2479	81.4159	59.6154	95.0413	88.785	92.8571	83.3333	88.4956	75.8621	61.7647	61.5385	50.4132	80.3419	80.531	64.4628
N2 EV	32	0	117				0	0				23	23	26.4957	61.0619	24.0385	84.2975	75.7009	80.9524	60.7843	68.1416	54.3103	27.451	44.4444	20.6612	57.265	57.5221	45.4545
N2 EV	35	0	117				0	0				25	25	13.6752	40.708	17.3077	74.3802	64.486	69.8413	47.0588	49.5575	36.2069	9.80392	28.2051	14.0496	38.4615	37.1681	19.0083
N2 EV	37	0	117				0	0				28	28	5.98291	22.1239	6.73077	62.8099	50.4673	60.3175	25.4902	33.6283	21.5517	2.94118	14.5299	5.78512	17.9487	21.2389	0.826446
N2 EV	39	0	117				0	0				30	30	0	12.3894	0.961538	42.9752	28.972	41.2698	10.7843	17.6991	12.069	0	7.69231	0	10.2564	12.3894	0
N2 EV	42	0	117				0	0				32	32		5.30973	0	24.7934	17.757	26.9841	5.88235	13.2743	8.62069		2.5641		5.12821	6.19469
N2 EV	44	0	117				0	0				35	35		0.884956		10.7438	8.41121	15.873	1.96078	8.84956	6.89655		0		1.7094	4.42478
N2 EV	46	0	117				0	0				37	37		0		4.13223	2.80374	7.93651	0	0	0				0	0
												39	39				1.65289	0.934579	3.1746
4OE EV	0	113	0				1	100				42	42				0	0	0
4OE EV	5	113	0				1	100				44	44
4OE EV	7	113	0				1	100				46	46
4OE EV	10	113	0	0			1	100
4OE EV	14	111	2	2			0.982301	98.2301
4OE EV	16	105	8	6			0.929204	92.9204
4OE EV	18	100	13	5			0.884956	88.4956
4OE EV	21	92	21	8			0.814159	81.4159
4OE EV	23	69	44	23			0.610619	61.0619
4OE EV	25	46	67	23			0.40708	40.708
4OE EV	28	25	88	21			0.221239	22.1239
4OE EV	30	14	99	11			0.123894	12.3894
4OE EV	32	6	107	8			0.0530973	5.30973
4OE EV	35	1	112	5			0.00884956	0.884956
4OE EV	37	0	113	1			0	0
4OE EV	39	0	113				0	0
4OE EV	42	0	113				0	0
4OE EV	44	0	113				0	0
4OE EV	46	0	113				0	0
4KO EV	0	104	0				1	100
4KO EV	5	104	0				1	100
4KO EV	7	104	0				1	100
4KO EV	10	104	0	0			1	100
4KO EV	14	98	6	6			0.942308	94.2308
4KO EV	16	90	14	8			0.865385	86.5385
4KO EV	18	79	25	11			0.759615	75.9615
4KO EV	21	62	42	17			0.596154	59.6154
4KO EV	23	25	79	37			0.240385	24.0385
4KO EV	25	18	86	7			0.173077	17.3077
4KO EV	28	7	97	11			0.0673077	6.73077
4KO EV	30	1	103	6			0.00961538	0.961538
4KO EV	32	0	104	1			0	0
4KO EV	35	0	104				0	0
4KO EV	37	0	104				0	0
4KO EV	39	0	104				0	0
4KO EV	42	0	104				0	0
4KO EV	44	0	104				0	0
4KO EV	46	0	104				0	0
N2 daf2	0	121	0				1	100
N2 daf2	5	121	0				1	100
N2 daf2	7	121	0				1	100
N2 daf2	10	121	0	0			1	100
N2 daf2	14	119	2	2			0.983471	98.3471
N2 daf2	16	119	2	0			0.983471	98.3471
N2 daf2	18	116	5	3			0.958678	95.8678
N2 daf2	21	115	6	1			0.950413	95.0413
N2 daf2	23	102	19	13			0.842975	84.2975
N2 daf2	25	90	31	12			0.743802	74.3802
N2 daf2	28	76	45	14			0.628099	62.8099
N2 daf2	30	52	69	24			0.429752	42.9752
N2 daf2	32	30	91	22			0.247934	24.7934
N2 daf2	35	13	108	17			0.107438	10.7438
N2 daf2	37	5	116	8			0.0413223	4.13223
N2 daf2	39	2	119	3			0.0165289	1.65289
N2 daf2	42	0	121	2			0	0
N2 daf2	44	0	121				0	0
N2 daf2	46	0	121				0	0
4OE daf2	0	107	0				1	100
4OE daf2	5	107	0				1	100
4OE daf2	7	107	0				1	100
4OE daf2	10	107	0	0			1	100
4OE daf2	14	104	3	3			0.971963	97.1963
4OE daf2	16	101	6	3			0.943925	94.3925
4OE daf2	18	98	9	3			0.915888	91.5888
4OE daf2	21	95	12	3			0.88785	88.785
4OE daf2	23	81	26	14			0.757009	75.7009
4OE daf2	25	69	38	12			0.64486	64.486
4OE daf2	28	54	53	15			0.504673	50.4673
4OE daf2	30	31	76	23			0.28972	28.972
4OE daf2	32	19	88	12			0.17757	17.757
4OE daf2	35	9	98	10			0.0841121	8.41121
4OE daf2	37	3	104	6			0.0280374	2.80374
4OE daf2	39	1	106	2			0.00934579	0.934579
4OE daf2	42	0	107	1			0	0
4OE daf2	44	0	107				0	0
4OE daf2	46	0	107				0	0
4KO daf2	0	126	0				1	100
4KO daf2	5	126	0				1	100
4KO daf2	7	126	0				1	100
4KO daf2	10	126	0	0			1	100
4KO daf2	14	124	2	2			0.984127	98.4127
4KO daf2	16	122	4	2			0.968254	96.8254
4KO daf2	18	118	8	4			0.936508	93.6508
4KO daf2	21	117	9	1			0.928571	92.8571
4KO daf2	23	102	24	15			0.809524	80.9524
4KO daf2	25	88	38	14			0.698413	69.8413
4KO daf2	28	76	50	12			0.603175	60.3175
4KO daf2	30	52	74	24			0.412698	41.2698
4KO daf2	32	34	92	18			0.269841	26.9841
4KO daf2	35	20	106	14			0.15873	15.873
4KO daf2	37	10	116	10			0.0793651	7.93651
4KO daf2	39	4	122	6			0.031746	3.1746
4KO daf2	42	0	126	4			0	0
4KO daf2	44	0	126				0	0
4KO daf2	46	0	126				0	0
N2 vhl-1	0	102	0				1	100
N2 vhl-1	5	102	0				1	100
N2 vhl-1	7	102	0				1	100
N2 vhl-1	10	102	0	0			1	100
N2 vhl-1	14	98	4	4			0.960784	96.0784
N2 vhl-1	16	95	7	3			0.931373	93.1373
N2 vhl-1	18	93	9	2			0.911765	91.1765
N2 vhl-1	21	85	17	8			0.833333	83.3333
N2 vhl-1	23	62	40	23			0.607843	60.7843
N2 vhl-1	25	48	54	14			0.470588	47.0588
N2 vhl-1	28	26	76	22			0.254902	25.4902
N2 vhl-1	30	11	91	15			0.107843	10.7843
N2 vhl-1	32	6	96	5			0.0588235	5.88235
N2 vhl-1	35	2	100	4			0.0196078	1.96078
N2 vhl-1	37	0	102	2			0	0
N2 vhl-1	39	0	102				0	0
N2 vhl-1	42	0	102				0	0
N2 vhl-1	44	0	102				0	0
N2 vhl-1	46	0	102				0	0
4OE vhl-1	0	113	0				1	100
4OE vhl-1	5	113	0				1	100
4OE vhl-1	7	113	0				1	100
4OE vhl-1	10	113	0	0			1	100
4OE vhl-1	14	113	0	0			1	100
4OE vhl-1	16	110	3	3			0.973451	97.3451
4OE vhl-1	18	104	9	6			0.920354	92.0354
4OE vhl-1	21	100	13	4			0.884956	88.4956
4OE vhl-1	23	77	36	23			0.681416	68.1416
4OE vhl-1	25	56	57	21			0.495575	49.5575
4OE vhl-1	28	38	75	18			0.336283	33.6283
4OE vhl-1	30	20	93	18			0.176991	17.6991
4OE vhl-1	32	15	98	5			0.132743	13.2743
4OE vhl-1	35	10	103	5			0.0884956	8.84956
4OE vhl-1	37	0	113	10			0	0
4OE vhl-1	39	0	113				0	0
4OE vhl-1	42	0	113				0	0
4OE vhl-1	44	0	113				0	0
4OE vhl-1	46
4KO vhl-1	0	116	0				1	100
4KO vhl-1	5	116	0				1	100
4KO vhl-1	7	116	0				1	100
4KO vhl-1	10	116	0	0			1	100
4KO vhl-1	14	109	7	7			0.939655	93.9655
4KO vhl-1	16	103	13	6			0.887931	88.7931
4KO vhl-1	18	95	21	8			0.818966	81.8966
4KO vhl-1	21	88	28	7			0.758621	75.8621
4KO vhl-1	23	63	53	25			0.543103	54.3103
4KO vhl-1	25	42	74	21			0.362069	36.2069
4KO vhl-1	28	25	91	17			0.215517	21.5517
4KO vhl-1	30	14	102	11			0.12069	12.069
4KO vhl-1	32	10	106	4			0.0862069	8.62069
4KO vhl-1	35	8	108	2			0.0689655	6.89655
4KO vhl-1	37	0	116	8			0	0
4KO vhl-1	39	0	116				0	0
4KO vhl-1	42	0	116				0	0
4KO vhl-1	44	0	116				0	0
4KO vhl-1	46	0	116				0	0
4KO vhl-1	47	0	116				0	0
N2 clk-1	0	102	0				1	100
N2 clk-1	5	102	0				1	100
N2 clk-1	7	102	0				1	100
N2 clk-1	10	102	0	0			1	100
N2 clk-1	14	100	2	2			0.980392	98.0392
N2 clk-1	16	94	8	6			0.921569	92.1569
N2 clk-1	18	84	18	10			0.823529	82.3529
N2 clk-1	21	63	39	21			0.617647	61.7647
N2 clk-1	23	28	74	35			0.27451	27.451
N2 clk-1	25	10	92	18			0.0980392	9.80392
N2 clk-1	28	3	99	7			0.0294118	2.94118
N2 clk-1	30	0	102	3			0	0
N2 clk-1	32	0	102				0	0
N2 clk-1	35	0	102				0	0
N2 clk-1	37	0	102				0	0
N2 clk-1	39	0	102				0	0
N2 clk-1	42	0	102				0	0
N2 clk-1	44	0	102				0	0
	46
4OE clk-1	0	117	0				1	100
4OE clk-1	5	117	0				1	100
4OE clk-1	7	117	0				1	100
4OE clk-1	10	117	0	0			1	100
4OE clk-1	14	112	5	5			0.957265	95.7265
4OE clk-1	16	104	13	8			0.888889	88.8889
4OE clk-1	18	95	22	9			0.811966	81.1966
4OE clk-1	21	72	45	23			0.615385	61.5385
4OE clk-1	23	52	65	20			0.444444	44.4444
4OE clk-1	25	33	84	19			0.282051	28.2051
4OE clk-1	28	17	100	16			0.145299	14.5299
4OE clk-1	30	9	108	8			0.0769231	7.69231
4OE clk-1	32	3	114	6			0.025641	2.5641
4OE clk-1	35	0	117	3			0	0
4OE clk-1	37	0	117				0	0
4OE clk-1	39	0	117				0	0
4OE clk-1	42	0	117				0	0
4OE clk-1	44	0	117				0	0
4OE clk-1	46
4KO clk-1	0	121	0				1	100
4KO clk-1	5	121	0				1	100
4KO clk-1	7	121	0				1	100
4KO clk-1	10	121	0	0			1	100
4KO clk-1	14	110	11	11			0.909091	90.9091
4KO clk-1	16	101	20	9			0.834711	83.4711
4KO clk-1	18	91	30	10			0.752066	75.2066
4KO clk-1	21	61	60	30			0.504132	50.4132
4KO clk-1	23	25	96	36			0.206612	20.6612
4KO clk-1	25	17	104	8			0.140496	14.0496
4KO clk-1	28	7	114	10			0.0578512	5.78512
4KO clk-1	30	0	121	7			0	0
4KO clk-1	32	0	121				0	0
4KO clk-1	35	0	121				0	0
4KO clk-1	37	0	121				0	0
4KO clk-1	39	0	121				0	0
4KO clk-1	42	0	121				0	0
4KO clk-1	44	0	121				0	0
4KO clk-1	46
N2 atf-6	0	117	0				1	100
N2 atf-6	5	117	0				1	100
N2 atf-6	7	117	0				1	100
N2 atf-6	10	117	0	0			1	100
N2 atf-6	14	113	4	4			0.965812	96.5812
N2 atf-6	16	110	7	3			0.940171	94.0171
N2 atf-6	18	104	13	6			0.888889	88.8889
N2 atf-6	21	94	23	10			0.803419	80.3419
N2 atf-6	23	67	50	27			0.57265	57.265
N2 atf-6	25	45	72	22			0.384615	38.4615
N2 atf-6	28	21	96	24			0.179487	17.9487
N2 atf-6	30	12	105	9			0.102564	10.2564
N2 atf-6	32	6	111	6			0.0512821	5.12821
N2 atf-6	35	2	115	4			0.017094	1.7094
N2 atf-6	37	0	117	2			0	0
N2 atf-6	39	0	117				0	0
N2 atf-6	42	0	117				0	0
N2 atf-6	44	0	117				0	0
N2 atf-6	46	0	117				0	0
4OE atf-6	0	113	0				1	100
4OE atf-6	5	113	0				1	100
4OE atf-6	7	113	0				1	100
4OE atf-6	10	113	0	0			1	100
4OE atf-6	14	109	4	4			0.964602	96.4602
4OE atf-6	16	105	8	4			0.929204	92.9204
4OE atf-6	18	99	14	6			0.876106	87.6106
4OE atf-6	21	91	22	8			0.80531	80.531
4OE atf-6	23	65	48	26			0.575221	57.5221
4OE atf-6	25	42	71	23			0.371681	37.1681
4OE atf-6	28	24	89	18			0.212389	21.2389
4OE atf-6	30	14	99	10			0.123894	12.3894
4OE atf-6	32	7	106	7			0.0619469	6.19469
4OE atf-6	35	5	108	2			0.0442478	4.42478
4OE atf-6	37	0	113	5			0	0
4OE atf-6	39	0	113				0	0
4OE atf-6	42	0	113				0	0
4OE atf-6	44	0	113				0	0
4OE atf-6	46
4KO atf-6	0	121	0				1	100
4KO atf-6	5	121	0				1	100
4KO atf-6	7	121	0				1	100
4KO atf-6	10	121	0	0			1	100
4KO atf-6	14	116	5	5			0.958678	95.8678
4KO atf-6	16	109	12	7			0.900826	90.0826
4KO atf-6	18	102	19	7			0.842975	84.2975
4KO atf-6	21	78	43	24			0.644628	64.4628
4KO atf-6	23	55	66	23			0.454545	45.4545
4KO atf-6	25	23	98	32			0.190083	19.0083
4KO atf-6	28	1	120	22			0.00826446	0.826446
4KO atf-6	30	0	121	1			0	0
4KO atf-6	32	0	121				0	0
4KO atf-6	35	0	121				0	0
4KO atf-6	37	0	121				0	0
4KO atf-6	39	0	121				0	0
4KO atf-6	42	0	121				0	0
4KO atf-6	44	0	121			0	0	0
4KO atf-6	46
4KO sams1	0	83	0			0	1	100
4KO sams1	5	83	0			0	1	100
4KO sams1	7	83	0			0	1	100
4KO sams1	10	83	0			0	1	100
4KO sams1	14	83	0			0	1	100
4KO sams1	16	83	0			0	1	100
4KO sams1	18	83	0			0	1	100
4KO sams1	21	83	0			0	1	100
4KO sams1	23	83	0			0	1	100
4KO sams1	25	83	0			0	1	100
4KO sams1	28	83	0			0	1	100
4KO sams1	30	83	0			0	1	100
4KO sams1	32	83	0			0	1	100
4KO sams1	35	83	0			0	1	100
4KO sams1	37	83	0			0	1	100
4KO sams1	39	83	0			0	1	100
4KO sams1	42	83	0			0	1	100
4KO sams1	44	83	0			0	1	100
4KO sams1	46	134	0			0	1	100
1OE sams1	0	114	0			0	1	100
1OE sams1	5	114	0			0	1	100
1OE sams1	7	114	0			0	1	100
1OE sams1	10	114	0			0	1	100
1OE sams1	14	114	0			0	1	100
1OE sams1	16	114	0			0	1	100
1OE sams1	18	114	0			0	1	100
1OE sams1	21	114	0			0	1	100
1OE sams1	23	114	0			0	1	100
1OE sams1	25	114	0			0	1	100
1OE sams1	28	114	0			0	1	100
1OE sams1	30	114	0			0	1	100
1OE sams1	32	114	0			0	1	100
1OE sams1	35	114	0			0	1	100
1OE sams1	37	114	0			0	1	100
1OE sams1	39	114	0			0	1	100
1OE sams1	42	114	0			0	1	100
1OE sams1	44	114	0			0	1	100
1OE sams1	46	114	0			0	1	100
1KO sams1	0	83	0			0	1	100
1KO sams1	5	83	0			0	1	100
1KO sams1	7	83	0			0	1	100
1KO sams1	9	83	0			0	1	100
1KO sams1	13	83	0			0	1	100
1KO sams1	15	83	0			0	1	100
1KO sams1	17	83	0			0	1	100
1KO sams1	20	83	0			0	1	100
1KO sams1	22	83	0			0	1	100
1KO sams1	24	83	0			0	1	100
1KO sams1	27	83	0			0	1	100
1KO sams1	29	83	0			0	1	100
1KO sams1	31	83	0			0	1	100
1KO sams1	34	83	0			0	1	100
1KO sams1	36	83	0			0	1	100
1KO sams1	38	83	0			0	1	100
1KO sams1	41	83	0			0	1	100
1KO sams1	43	83	0			0	1	100
1KO sams1	45	83	0			0	1	100
							0

## Sheet: vhl1 stats
% WT EV [117]						condition	chi	pvalue	corrected_pvalue
#days	dead	censored				WT EV v.s. fmo-4 OE EV	31.92	1.6e-08	8.1e-08
0						WT EV v.s. fmo-4 KO EV	0.01	0.9278	1
5						WT EV v.s. WT vhl	34.96	3.4e-09	1.7e-08
7						WT EV v.s. 4OE vhl1	54.09	0	0
10	0					WT EV v.s. fmo-4 KO vhl1	22.08	2.6e-06	1.3e-05
14	8					fmo-4 OE EV v.s. WT EV	31.92	1.6e-08	8.1e-08
16	8					fmo-4 OE EV v.s. fmo-4 KO EV	27.59	1.5e-07	7.5e-07
18	13					fmo-4 OE EV v.s. WT vhl	0.28	0.599	1
21	14					fmo-4 OE EV v.s. 4OE vhl1	6.1	0.0135	0.0674
23	43					fmo-4 OE EV v.s. fmo-4 KO vhl1	0	0.971	1
25	15					fmo-4 KO EV v.s. WT EV	0.01	0.9278	1
28	9					fmo-4 KO EV v.s. fmo-4 OE EV	27.59	1.5e-07	7.5e-07
30	7					fmo-4 KO EV v.s. WT vhl	30.42	3.5e-08	1.7e-07
32						fmo-4 KO EV v.s. 4OE vhl1	48.67	0	0
35						fmo-4 KO EV v.s. fmo-4 KO vhl1	19.37	1.1e-05	0.0001
37						WT vhl v.s. WT EV	34.96	3.4e-09	1.7e-08
39						WT vhl v.s. fmo-4 OE EV	0.28	0.599	1
42						WT vhl v.s. fmo-4 KO EV	30.42	3.5e-08	1.7e-07
44						WT vhl v.s. 4OE vhl1	3.58	0.0586	0.293
46						WT vhl v.s. fmo-4 KO vhl1	0.22	0.6408	1
						4OE vhl1 v.s. WT EV	54.09	0	0
% fmo-4 OE EV [113]						4OE vhl1 v.s. fmo-4 OE EV	6.1	0.0135	0.0674
#days	dead	censored				4OE vhl1 v.s. fmo-4 KO EV	48.67	0	0
0						4OE vhl1 v.s. WT vhl	3.58	0.0586	0.293
5						4OE vhl1 v.s. fmo-4 KO vhl1	4.85	0.0277	0.1383
7						fmo-4 KO vhl1 v.s. WT EV	22.08	2.6e-06	1.3e-05
10	0					fmo-4 KO vhl1 v.s. fmo-4 OE EV	0	0.971	1
14	2					fmo-4 KO vhl1 v.s. fmo-4 KO EV	19.37	1.1e-05	0.0001
16	6					fmo-4 KO vhl1 v.s. WT vhl	0.22	0.6408	1
18	5					fmo-4 KO vhl1 v.s. 4OE vhl1	4.85	0.0277	0.1383
21	8
23	23
25	23
28	21
30	11
32	8
35	5
37	1
39
42
44
46
% fmo-4 KO EV [104]
#days	dead	censored
0
5
7
10	0
14	6
16	8
18	11
21	17
23	37
25	7
28	11
30	6
32	1
35
37
39
42
44
46
% WT vhl [102]
#days	dead	censored
0
5
7
10	0
14	4
16	3
18	2
21	8
23	23
25	14
28	22
30	15
32	5
35	4
37	2
39
42
44
46
% 4OE vhl1 [113]
#days	dead	censored
0
5
7
10	0
14	0
16	3
18	6
21	4
23	23
25	21
28	18
30	18
32	5
35	5
37	10
39
42
44
46
% fmo-4 KO vhl1 [116]
#days	dead	censored
0
5
7
10	0
14	7
16	6
18	8
21	7
23	25
25	21
28	17
30	11
32	4
35	2
37	8
39
42
44
46

## Sheet: daf2 stats
% WT EV [117]					condition	chi	pvalue	corrected_pvalue
#days	dead	censored			WT EV v.s. fmo-4 OE EV	31.92	1.6e-08	8.1e-08
0					WT EV v.s. fmo-4 KO EV	0.01	0.9278	1
5					WT EV v.s. WT daf2	126.33	0	0
7					WT EV v.s. 4OE daf2	79.22	0	0
10	0				WT EV v.s. fmo-4 KO daf2	115.05	0	0
14	8				fmo-4 OE EV v.s. WT EV	31.92	1.6e-08	8.1e-08
16	8				fmo-4 OE EV v.s. fmo-4 KO EV	27.59	1.5e-07	7.5e-07
18	13				fmo-4 OE EV v.s. WT daf2	43.31	0	0
21	14				fmo-4 OE EV v.s. 4OE daf2	18.96	1.3e-05	0.0001
23	43				fmo-4 OE EV v.s. fmo-4 KO daf2	41.03	0	0
25	15				fmo-4 KO EV v.s. WT EV	0.01	0.9278	1
28	9				fmo-4 KO EV v.s. fmo-4 OE EV	27.59	1.5e-07	7.5e-07
30	7				fmo-4 KO EV v.s. WT daf2	115.2	0	0
32					fmo-4 KO EV v.s. 4OE daf2	71.23	0	0
35					fmo-4 KO EV v.s. fmo-4 KO daf2	105.24	0	0
37					WT daf2 v.s. WT EV	126.33	0	0
39					WT daf2 v.s. fmo-4 OE EV	43.31	0	0
42					WT daf2 v.s. fmo-4 KO EV	115.2	0	0
44					WT daf2 v.s. 4OE daf2	3.75	0.0529	0.2643
46					WT daf2 v.s. fmo-4 KO daf2	0.21	0.6493	1
					4OE daf2 v.s. WT EV	79.22	0	0
% fmo-4 OE EV [113]					4OE daf2 v.s. fmo-4 OE EV	18.96	1.3e-05	0.0001
#days	dead	censored			4OE daf2 v.s. fmo-4 KO EV	71.23	0	0
0					4OE daf2 v.s. WT daf2	3.75	0.0529	0.2643
5					4OE daf2 v.s. fmo-4 KO daf2	4.9	0.0268	0.134
7					fmo-4 KO daf2 v.s. WT EV	115.05	0	0
10	0				fmo-4 KO daf2 v.s. fmo-4 OE EV	41.03	0	0
14	2				fmo-4 KO daf2 v.s. fmo-4 KO EV	105.24	0	0
16	6				fmo-4 KO daf2 v.s. WT daf2	0.21	0.6493	1
18	5				fmo-4 KO daf2 v.s. 4OE daf2	4.9	0.0268	0.134
21	8
23	23
25	23
28	21
30	11
32	8
35	5
37	1
39
42
44
46
% fmo-4 KO EV [104]
#days	dead	censored
0
5
7
10	0
14	6
16	8
18	11
21	17
23	37
25	7
28	11
30	6
32	1
35
37
39
42
44
46
% WT daf2 [121]
#days	dead	censored
0
5
7
10	0
14	2
16	0
18	3
21	1
23	13
25	12
28	14
30	24
32	22
35	17
37	8
39	3
42	2
44
46
% 4OE daf2 [107]
#days	dead	censored
0
5
7
10	0
14	3
16	3
18	3
21	3
23	14
25	12
28	15
30	23
32	12
35	10
37	6
39	2
42	1
44
46
% fmo-4 KO daf2 [126]
#days	dead	censored
0
5
7
10	0
14	2
16	2
18	4
21	1
23	15
25	14
28	12
30	24
32	18
35	14
37	10
39	6
42	4
44
46

## Sheet: Sheet1
#1	N2								#1	N2					#1	N2
#2	Lei42	fmo-2p::MC; unc-119p::HIF-1(P621A); JT307 #1							#2	Lei42	fmo-2p::MC; unc-119p::HIF-1(P621A); JT307 #1				#11L	Lei51	fmo-2p::MC; JT307; gcy-31; gcy-36 - XA2262 sibling #1
#3	Lei43	fmo-2p::MC; unc-119p::HIF-1(P621A); JT307 #2							#3	Lei43	fmo-2p::MC; unc-119p::HIF-1(P621A); JT307 #2				#12L	Lei52	fmo-2p::MC; JT307; gcy-33; gcy-36 - XA2262 sibling #1
#4	Lei44	fmo-2p::MC; TU3311; CB5602 #1							#4	Lei44	fmo-2p::MC; TU3311; CB5602 #1				#13	Lei53	fmo-2p::MC; JT307; gcy-33; gcy-36 - XA2262 sibling #2
#5	Lei45	fmo-2p::MC; TU3311 #1							#5	Lei45	fmo-2p::MC; TU3311 #1				#14L	Lei55	fmo-2p::MC; JT307 - XA2262 sibling #1
#6	Lei46	fmo-2p::MC; CB5602 #1							#6	Lei46	fmo-2p::MC; CB5602 #1				#15L	Lei56	fmo-2p::MC; JT307 - XA2262 sibling #2
#7	Lei47	fmo-2p::MC; TU3311; CB5602 #2							#7	Lei47	fmo-2p::MC; TU3311; CB5602 #2				#16	Lei57	fmo-2p::MC - XA2262 sibling #1
#8L	Lei48	fmo-2p::MC; JT307; XA2262 #1													#17	Lei58	fmo-2p::MC - XA2262 sibling #2
#9	Lei49	fmo-2p::MC; JT307; XA2262 #2													#18	Lei59	fmo-2p::MC; gcy-33; gcy-36 - XA2262 sibling #1
#10L	Lei50	fmo-2p::MC; JT307; XA2262 #3							#1	N2					#19	Lei60	fmo-2p::MC; gcy-33; gcy-36 - XA2262 sibling #2
#11L	Lei51	fmo-2p::MC; JT307; gcy-31; gcy-36 - XA2262 sibling #1							#8L	Lei48	fmo-2p::MC; JT307; XA2262 #1
#12L	Lei52	fmo-2p::MC; JT307; gcy-33; gcy-36 - XA2262 sibling #1							#9	Lei49	fmo-2p::MC; JT307; XA2262 #2
#13	Lei53	fmo-2p::MC; JT307; gcy-33; gcy-36 - XA2262 sibling #2							#10L	Lei50	fmo-2p::MC; JT307; XA2262 #3
#14L	Lei55	fmo-2p::MC; JT307 - XA2262 sibling #1							#14L	Lei55	fmo-2p::MC; JT307 - XA2262 sibling #1
#15L	Lei56	fmo-2p::MC; JT307 - XA2262 sibling #2							#15L	Lei56	fmo-2p::MC; JT307 - XA2262 sibling #2
#16	Lei57	fmo-2p::MC - XA2262 sibling #1							#16	Lei57	fmo-2p::MC - XA2262 sibling #1
#17	Lei58	fmo-2p::MC - XA2262 sibling #2							#17	Lei58	fmo-2p::MC - XA2262 sibling #2
#18	Lei59	fmo-2p::MC; gcy-33; gcy-36 - XA2262 sibling #1							#20	Lei61	fmo-2p::MC; XA2262 #1
#19	Lei60	fmo-2p::MC; gcy-33; gcy-36 - XA2262 sibling #2							#21	Lei62	fmo-2p::MC; XA2262 #2
#20	Lei61	fmo-2p::MC; XA2262 #1
#21	Lei62	fmo-2p::MC; XA2262 #2
