# Supplementary material for: fmo-4 promotes longevity and stress resistance via ER to mitochondria calcium regulation in C. elegans
Source: eLife journal article supplement (doi:10.7554/elife.99971), 2024-08-27
Supplement: fig1-data4 [file 12Dec2022 RNAi longevity lifespan atf6 daf2 vhl1 for PAPER.xlsx]

## Sheet: lifespan
strain	day	alive	dead-total	dead-normal	dead-ruptured	censored	ratio-alive	percentage-alive
N2 EV	0	115	0				1	100
N2 EV	5	115	0				1	100
N2 EV	7	115	0				1	100						1	2	3	4	5	6	7	8	9	10	11	12	13	14	15
N2 EV	10	115	0	0			1	100			plot data here-->		day	WT; EV	FMO-4 OE; EV	FMO-4 KO; EV	WT; atf-6 RNAi	FMO-4 OE; atf-6 RNAi	FMO-4 KO; atf-6 RNAi	WT; daf-2 RNAi	4OE; daf-2	FMO-4KO; daf-2 RNAi	WT; vhl-1 RNAi	4OE; vhl-1	FMO-4 KO; vhl-1 RNAi
N2 EV	12	112	3	3			0.973913	97.3913				0	0	100	100	100	100	100	100	100	100	100	100	100	100
N2 EV	14	108	7	4			0.93913	93.913				5	5	100	100	100	100	100	100	100	100	100	100	100	100
N2 EV	17	96	19	12			0.834783	83.4783				7	7	100	100	100	100	100	100	100	100	100	100	100	100
N2 EV	19	81	34	15			0.704348	70.4348				10	0	100	100	100	100	100	100	100	100	100	100	100	100
N2 EV	21	61	54	20			0.530435	53.0435				12	12	97.3913	99.0654	98.0952	100	100	94.2308	100	100	98.3051	100	100	99.0826
N2 EV	24	45	70	16			0.391304	39.1304				14	14	93.913	97.1963	96.1905	98.9796	98	88.4615	98.3333	97.4359	98.3051	100	99.0741	98.1651
N2 EV	26	32	83	13			0.278261	27.8261				17	17	83.4783	95.3271	89.5238	95.9184	95	75.9615	95.8333	94.8718	94.9153	95.4955	93.5185	92.6606
N2 EV	28	22	93	10			0.191304	19.1304				19	19	70.4348	93.4579	76.1905	91.8367	90	64.4231	91.6667	89.7436	89.8305	87.3874	89.8148	86.2385
N2 EV	31	14	101	8			0.121739	12.1739				21	21	53.0435	85.9813	65.7143	86.7347	83	49.0385	88.3333	85.4701	86.4407	84.6847	85.1852	79.8165
N2 EV	33	8	107	6			0.0695652	6.95652				24	24	39.1304	80.3738	45.7143	79.5918	76	33.6538	86.6667	82.0513	81.3559	72.973	76.8519	64.2202
N2 EV	35	0	115	8			0	0				26	26	27.8261	69.1589	23.8095	62.2449	64	21.1538	82.5	75.2137	76.2712	64.8649	64.8148	55.0459
N2 EV	38	0	115				0	0				28	28	19.1304	58.8785	18.0952	46.9388	45	11.5385	78.3333	69.2308	69.4915	50.4505	47.2222	39.4495
N2 EV	40	0	115				0	0				31	31	12.1739	41.1215	4.7619	25.5102	25	3.84615	64.1667	52.1368	54.2373	28.8288	28.7037	20.1835
N2 EV	42	0	115				0	0				33	33	6.95652	20.5607	1.90476	18.3673	19	0.961538	54.1667	42.735	45.7627	18.9189	18.5185	15.5963
N2 EV	45	0	115				0	0				35	35	0	16.8224	0	14.2857	14	0	47.5	34.188	38.9831	11.7117	9.25926	8.25688
												38	38		9.34579		8.16327	6		33.3333	20.5128	28.8136	6.66667	4.62963	4.58716
4OE EV	0	107	0				1	100				40	40		0		1.02041	0		15.8333	12.8205	16.9492	0	0	0
4OE EV	5	107	0				1	100				42	42				0			10	7.69231	11.8644
4OE EV	7	107	0				1	100				45	45							5	2.5641	5.08475
4OE EV	10	107	0	0			1	100				47	47							0	0	0
4OE EV	12	106	1	1			0.990654	99.0654
4OE EV	14	104	3	2			0.971963	97.1963
4OE EV	17	102	5	2			0.953271	95.3271
4OE EV	19	100	7	2			0.934579	93.4579
4OE EV	21	92	15	8			0.859813	85.9813
4OE EV	24	86	21	6			0.803738	80.3738
4OE EV	26	74	33	12			0.691589	69.1589
4OE EV	28	63	44	11			0.588785	58.8785
4OE EV	31	44	63	19			0.411215	41.1215
4OE EV	33	22	85	22			0.205607	20.5607
4OE EV	35	18	89	4			0.168224	16.8224
4OE EV	38	10	97	8			0.0934579	9.34579
4OE EV	40	0	107	10			0	0
4OE EV	42	0	107				0	0
4OE EV	45	0	107				0	0
4KO EV	0	105	0				1	100
4KO EV	5	105	0				1	100
4KO EV	7	105	0				1	100
4KO EV	10	105	0	0			1	100
4KO EV	12	103	2	2			0.980952	98.0952
4KO EV	14	101	4	2			0.961905	96.1905
4KO EV	17	94	11	7			0.895238	89.5238
4KO EV	19	80	25	14			0.761905	76.1905
4KO EV	21	69	36	11			0.657143	65.7143
4KO EV	24	48	57	21			0.457143	45.7143
4KO EV	26	25	80	23			0.238095	23.8095
4KO EV	28	19	86	6			0.180952	18.0952
4KO EV	31	5	100	14			0.047619	4.7619
4KO EV	33	2	103	3			0.0190476	1.90476
4KO EV	35	0	105	2			0	0
4KO EV	38	0	105				0	0
4KO EV	40	0	105				0	0
4KO EV	42	0	105				0	0
4KO EV	45	0	105				0	0
WT atf6	0	98	0				1	100
WT atf6	5	98	0				1	100
WT atf6	7	98	0				1	100
WT atf6	10	98	0	0			1	100
WT atf6	12	98	0	0			1	100
WT atf6	14	97	1	1			0.989796	98.9796
WT atf6	17	94	4	3			0.959184	95.9184
WT atf6	19	90	8	4			0.918367	91.8367
WT atf6	21	85	13	5			0.867347	86.7347
WT atf6	24	78	20	7			0.795918	79.5918
WT atf6	26	61	37	17			0.622449	62.2449
WT atf6	28	46	52	15			0.469388	46.9388
WT atf6	31	25	73	21			0.255102	25.5102
WT atf6	33	18	80	7			0.183673	18.3673
WT atf6	35	14	84	4			0.142857	14.2857
WT atf6	38	8	90	6			0.0816327	8.16327
WT atf6	40	1	97	7			0.0102041	1.02041
WT atf6	42	0	98	1			0	0
WT atf6	45	0	98				0	0
4OE atf6	0	100	0				1	100
4OE atf6	5	100	0				1	100
4OE atf6	7	100	0				1	100
4OE atf6	10	100	0	0			1	100
4OE atf6	12	100	0	0			1	100
4OE atf6	14	98	2	2			0.98	98
4OE atf6	17	95	5	3			0.95	95
4OE atf6	19	90	10	5			0.9	90
4OE atf6	21	83	17	7			0.83	83
4OE atf6	24	76	24	7			0.76	76
4OE atf6	26	64	36	12			0.64	64
4OE atf6	28	45	55	19			0.45	45
4OE atf6	31	25	75	20			0.25	25
4OE atf6	33	19	81	6			0.19	19
4OE atf6	35	14	86	5			0.14	14
4OE atf6	38	6	94	8			0.06	6
4OE atf6	40	0	100	6			0	0
4OE atf6	42	0	100				0	0
4OE atf6	45	0	100				0	0
4KO atf6	0	104	0				1	100
4KO atf6	5	104	0				1	100
4KO atf6	7	104	0				1	100
4KO atf6	10	104	0	0			1	100
4KO atf6	12	98	6	6			0.942308	94.2308
4KO atf6	14	92	12	6			0.884615	88.4615
4KO atf6	17	79	25	13			0.759615	75.9615
4KO atf6	19	67	37	12			0.644231	64.4231
4KO atf6	21	51	53	16			0.490385	49.0385
4KO atf6	24	35	69	16			0.336538	33.6538
4KO atf6	26	22	82	13			0.211538	21.1538
4KO atf6	28	12	92	10			0.115385	11.5385
4KO atf6	31	4	100	8			0.0384615	3.84615
4KO atf6	33	1	103	3			0.00961538	0.961538
4KO atf6	35	0	104	1			0	0
4KO atf6	38	0	104				0	0
4KO atf6	40	0	104				0	0
4KO atf6	42	0	104				0	0
4KO atf6	45	0	104				0	0
WT daf2	0	120	0				1	100
WT daf2	5	120	0				1	100
WT daf2	7	120	0				1	100
WT daf2	10	120	0	0			1	100
WT daf2	12	120	0	0			1	100
WT daf2	14	118	2	2			0.983333	98.3333
WT daf2	17	115	5	3			0.958333	95.8333
WT daf2	19	110	10	5			0.916667	91.6667
WT daf2	21	106	14	4			0.883333	88.3333
WT daf2	24	104	16	2			0.866667	86.6667
WT daf2	26	99	21	5			0.825	82.5
WT daf2	28	94	26	5			0.783333	78.3333
WT daf2	31	77	43	17			0.641667	64.1667
WT daf2	33	65	55	12			0.541667	54.1667
WT daf2	35	57	63	8			0.475	47.5
WT daf2	38	40	80	17			0.333333	33.3333
WT daf2	40	19	101	21			0.158333	15.8333
WT daf2	42	12	108	7			0.1	10
WT daf2	45	6	114	6			0.05	5
	47	0	120	6			0	0
4OE daf2	0	117	0				1	100
4OE daf2	5	117	0				1	100
4OE daf2	7	117	0				1	100
4OE daf2	10	117	0	0			1	100
4OE daf2	12	117	0	0			1	100
4OE daf2	14	114	3	3			0.974359	97.4359
4OE daf2	17	111	6	3			0.948718	94.8718
4OE daf2	19	105	12	6			0.897436	89.7436
4OE daf2	21	100	17	5			0.854701	85.4701
4OE daf2	24	96	21	4			0.820513	82.0513
4OE daf2	26	88	29	8			0.752137	75.2137
4OE daf2	28	81	36	7			0.692308	69.2308
4OE daf2	31	61	56	20			0.521368	52.1368
4OE daf2	33	50	67	11			0.42735	42.735
4OE daf2	35	40	77	10			0.34188	34.188
4OE daf2	38	24	93	16			0.205128	20.5128
4OE daf2	40	15	102	9			0.128205	12.8205
4OE daf2	42	9	108	6			0.0769231	7.69231
4OE daf2	45	3	114	6			0.025641	2.5641
	47	0	117	3			0	0
4KO daf2	0	59	0				1	100
4KO daf2	5	59	0				1	100
4KO daf2	7	59	0				1	100
4KO daf2	10	59	0	0			1	100
4KO daf2	12	58	1	1			0.983051	98.3051
4KO daf2	14	58	1	0			0.983051	98.3051
4KO daf2	17	56	3	2			0.949153	94.9153
4KO daf2	19	53	6	3			0.898305	89.8305
4KO daf2	21	51	8	2			0.864407	86.4407
4KO daf2	24	48	11	3			0.813559	81.3559
4KO daf2	26	45	14	3			0.762712	76.2712
4KO daf2	28	41	18	4			0.694915	69.4915
4KO daf2	31	32	27	9			0.542373	54.2373
4KO daf2	33	27	32	5			0.457627	45.7627
4KO daf2	35	23	36	4			0.389831	38.9831
4KO daf2	38	17	42	6			0.288136	28.8136
4KO daf2	40	10	49	7			0.169492	16.9492
4KO daf2	42	7	52	3			0.118644	11.8644
4KO daf2	45	3	56	4			0.0508475	5.08475
4KO daf2	47	0	59	3			0	0
WT vhl1	0	111	0				1	100
WT vhl1	5	111	0				1	100
WT vhl1	7	111	0				1	100
WT vhl1	10	111	0	0			1	100
WT vhl1	12	111	0	0			1	100
WT vhl1	14	111	0	0			1	100
WT vhl1	17	106	5	5			0.954955	95.4955
WT vhl1	19	97	14	9			0.873874	87.3874
WT vhl1	21	94	17	3			0.846847	84.6847
WT vhl1	24	81	30	13			0.72973	72.973
WT vhl1	26	72	39	9			0.648649	64.8649
WT vhl1	28	56	55	16			0.504505	50.4505
WT vhl1	31	32	79	24			0.288288	28.8288
WT vhl1	33	21	90	11			0.189189	18.9189
WT vhl1	35	13	98	8			0.117117	11.7117
WT vhl1	38	8	103	5			0.0683761	6.83761
WT vhl1	40	0	111	8			0	0
WT vhl1	42	0	111				0	0
	45
4OE vhl1	0	108	0				1	100
4OE vhl1	5	108	0				1	100
4OE vhl1	7	108	0				1	100
4OE vhl1	10	108	0	0			1	100
4OE vhl1	12	108	0	0			1	100
4OE vhl1	14	107	1	1			0.990741	99.0741
4OE vhl1	17	101	7	6			0.935185	93.5185
4OE vhl1	19	97	11	4			0.898148	89.8148
4OE vhl1	21	92	16	5			0.851852	85.1852
4OE vhl1	24	83	25	9			0.768519	76.8519
4OE vhl1	26	70	38	13			0.648148	64.8148
4OE vhl1	28	51	57	19			0.472222	47.2222
4OE vhl1	31	31	77	20			0.287037	28.7037
4OE vhl1	33	20	88	11			0.185185	18.5185
4OE vhl1	35	10	98	10			0.0925926	9.25926
4OE vhl1	38	5	103	5			0.0462963	4.62963
4OE vhl1	40	0	108	5			0	0
4OE vhl1	42	0	108				0	0
4OE vhl1	45
4KO vhl1	0	109	0				1	100
4KO vhl1	5	109	0				1	100
4KO vhl1	7	109	0				1	100
4KO vhl1	10	109	0	0			1	100
4KO vhl1	12	108	1	1			0.990826	99.0826
4KO vhl1	14	107	2	1			0.981651	98.1651
4KO vhl1	17	101	8	6			0.926606	92.6606
4KO vhl1	19	94	15	7			0.862385	86.2385
4KO vhl1	21	87	22	7			0.798165	79.8165
4KO vhl1	24	70	39	17			0.642202	64.2202
4KO vhl1	26	60	49	10			0.550459	55.0459
4KO vhl1	28	43	66	17			0.394495	39.4495
4KO vhl1	31	22	87	21			0.201835	20.1835
4KO vhl1	33	17	92	5			0.155963	15.5963
4KO vhl1	35	9	100	8			0.0825688	8.25688
4KO vhl1	38	5	104	4			0.0458716	4.58716
4KO vhl1	40	0	109	5			0	0
4KO vhl1	42	0	109				0	0
4KO vhl1	45
WT rsks1	0	119	0				1	100
WT rsks1	5	119	0				1	100
WT rsks1	7	119	0				1	100
WT rsks1	10	119	0				1	100
WT rsks1	12	119	0				1	100
WT rsks1	14	119	0				1	100
WT rsks1	17	119	0				1	100
WT rsks1	19	119	0				1	100
WT rsks1	21	119	0				1	100
WT rsks1	24	119	0				1	100
WT rsks1	26	119	0				1	100
WT rsks1	28	119	0				1	100
WT rsks1	31	119	0				1	100
WT rsks1	33	119	0				1	100
WT rsks1	35	119	0				1	100
WT rsks1	38	119	0				1	100
WT rsks1	40	119	0				1	100
WT rsks1	42	119	0				1	100
WT rsks1	45	119	0				1	100
4OE rsks1	0	70	0				1	100
4OE rsks1	5	70	0				1	100
4OE rsks1	7	70	0				1	100
4OE rsks1	10	70	0				1	100
4OE rsks1	12	70	0				1	100
4OE rsks1	14	70	0				1	100
4OE rsks1	17	70	0				1	100
4OE rsks1	19	70	0				1	100
4OE rsks1	21	70	0				1	100
4OE rsks1	24	70	0				1	100
4OE rsks1	26	70	0				1	100
4OE rsks1	28	70	0				1	100
4OE rsks1	31	70	0				1	100
4OE rsks1	33	70	0				1	100
4OE rsks1	35	70	0				1	100
4OE rsks1	38	70	0				1	100
4OE rsks1	40	70	0				1	100
4OE rsks1	42	70	0				1	100
4OE rsks1	45
4KO rsks1	0	113	0				1	100
4KO rsks1	5	113	0				1	100
4KO rsks1	7	113	0				1	100
4KO rsks1	10	113	0				1	100
4KO rsks1	12	113	0				1	100
4KO rsks1	14	113	0				1	100
4KO rsks1	17	113	0				1	100
4KO rsks1	19	113	0				1	100
4KO rsks1	21	113	0				1	100
4KO rsks1	24	113	0				1	100
4KO rsks1	26	113	0				1	100
4KO rsks1	28	113	0				1	100
4KO rsks1	31	113	0				1	100
4KO rsks1	33	113	0				1	100
4KO rsks1	35	113	0				1	100
4KO rsks1	38	113	0				1	100
4KO rsks1	40	113	0				1	100
4KO rsks1	42	113	0			0	1	100
4KO rsks1	45
4KO sams1	0	83	0			0	1	100
4KO sams1	5	83	0			0	1	100
4KO sams1	7	83	0			0	1	100
4KO sams1	10	83	0			0	1	100
4KO sams1	12	83	0			0	1	100
4KO sams1	14	83	0			0	1	100
4KO sams1	17	83	0			0	1	100
4KO sams1	19	83	0			0	1	100
4KO sams1	21	83	0			0	1	100
4KO sams1	24	83	0			0	1	100
4KO sams1	26	83	0			0	1	100
4KO sams1	28	83	0			0	1	100
4KO sams1	31	83	0			0	1	100
4KO sams1	33	83	0			0	1	100
4KO sams1	35	83	0			0	1	100
4KO sams1	38	83	0			0	1	100
4KO sams1	40	83	0			0	1	100
4KO sams1	42	83	0			0	1	100
4KO sams1	45	134	0			0	1	100
1OE sams1	0	114	0			0	1	100
1OE sams1	5	114	0			0	1	100
1OE sams1	7	114	0			0	1	100
1OE sams1	10	114	0			0	1	100
1OE sams1	12	114	0			0	1	100
1OE sams1	14	114	0			0	1	100
1OE sams1	17	114	0			0	1	100
1OE sams1	19	114	0			0	1	100
1OE sams1	21	114	0			0	1	100
1OE sams1	24	114	0			0	1	100
1OE sams1	26	114	0			0	1	100
1OE sams1	28	114	0			0	1	100
1OE sams1	31	114	0			0	1	100
1OE sams1	33	114	0			0	1	100
1OE sams1	35	114	0			0	1	100
1OE sams1	38	114	0			0	1	100
1OE sams1	40	114	0			0	1	100
1OE sams1	42	114	0			0	1	100
1OE sams1	45	114	0			0	1	100
1KO sams1	0	83	0			0	1	100
1KO sams1	5	83	0			0	1	100
1KO sams1	7	83	0			0	1	100
1KO sams1	9	83	0			0	1	100
1KO sams1	13	83	0			0	1	100
1KO sams1	15	83	0			0	1	100
1KO sams1	17	83	0			0	1	100
1KO sams1	20	83	0			0	1	100
1KO sams1	22	83	0			0	1	100
1KO sams1	24	83	0			0	1	100
1KO sams1	27	83	0			0	1	100
1KO sams1	29	83	0			0	1	100
1KO sams1	31	83	0			0	1	100
1KO sams1	34	83	0			0	1	100
1KO sams1	36	83	0			0	1	100
1KO sams1	38	83	0			0	1	100
1KO sams1	41	83	0			0	1	100
1KO sams1	43	83	0			0	1	100
1KO sams1	45	83	0			0	1	100
							0

## Sheet: atf6 stats
% WT EV [115]							condition	chi	pvalue	corrected_pvalue
#days	dead	censored					WT EV v.s. fmo-4 OE EV	47.4	0	0
0							WT EV v.s. fmo-4 KO EV	0.03	0.8706	1
5							WT EV v.s. WT atf6 rnai	32.51	1.2e-08	5.9e-08
7							WT EV v.s. fmo-4 OE atf6 rnai	30.32	3.7e-08	1.8e-07
10	0						WT EV v.s. fmo-4 KO rnai	3.95	0.0469	0.2343
12	3						fmo-4 OE EV v.s. WT EV	47.4	0	0
14	4						fmo-4 OE EV v.s. fmo-4 KO EV	56.49	0	0
17	12						fmo-4 OE EV v.s. WT atf6 rnai	1.47	0.2249	1
19	15						fmo-4 OE EV v.s. fmo-4 OE atf6 rnai	2.69	0.1011	0.5055
21	20						fmo-4 OE EV v.s. fmo-4 KO rnai	74.8	0	0
24	16						fmo-4 KO EV v.s. WT EV	0.03	0.8706	1
26	13						fmo-4 KO EV v.s. fmo-4 OE EV	56.49	0	0
28	10						fmo-4 KO EV v.s. WT atf6 rnai	37.47	0	0
31	8						fmo-4 KO EV v.s. fmo-4 OE atf6 rnai	34.57	4.1e-09	2.1e-08
33	6						fmo-4 KO EV v.s. fmo-4 KO rnai	3.94	0.0472	0.2359
35	8						WT atf6 rnai v.s. WT EV	32.51	1.2e-08	5.9e-08
38							WT atf6 rnai v.s. fmo-4 OE EV	1.47	0.2249	1
40							WT atf6 rnai v.s. fmo-4 KO EV	37.47	0	0
42							WT atf6 rnai v.s. fmo-4 OE atf6 rnai	0.16	0.6902	1
45							WT atf6 rnai v.s. fmo-4 KO rnai	54.55	0	0
47							fmo-4 OE atf6 rnai v.s. WT EV	30.32	3.7e-08	1.8e-07
							fmo-4 OE atf6 rnai v.s. fmo-4 OE EV	2.69	0.1011	0.5055
							fmo-4 OE atf6 rnai v.s. fmo-4 KO EV	34.57	4.1e-09	2.1e-08
% fmo-4 OE EV [107]							fmo-4 OE atf6 rnai v.s. WT atf6 rnai	0.16	0.6902	1
#days	dead	censored					fmo-4 OE atf6 rnai v.s. fmo-4 KO rnai	51.23	0	0
0							fmo-4 KO rnai v.s. WT EV	3.95	0.0469	0.2343
5							fmo-4 KO rnai v.s. fmo-4 OE EV	74.8	0	0
7							fmo-4 KO rnai v.s. fmo-4 KO EV	3.94	0.0472	0.2359
10	0						fmo-4 KO rnai v.s. WT atf6 rnai	54.55	0	0
12	1						fmo-4 KO rnai v.s. fmo-4 OE atf6 rnai	51.23	0	0
14	2
17	2
19	2
21	8
24	6
26	12
28	11
31	19
33	22
35	4
38	8
40	10
42
45
47
% fmo-4 KO EV [105]
#days	dead	censored
0
5
7
10	0
12	2
14	2
17	7
19	14
21	11
24	21
26	23
28	6
31	14
33	3
35	2
38
40
42
45
47
% WT atf6 rnai [98]
#days	dead	censored
0
5
7
10	0
12	0
14	1
17	3
19	4
21	5
24	7
26	17
28	15
31	21
33	7
35	4
38	6
40	7
42	1
45
47
% fmo-4 OE atf6 rnai [100]
#days	dead	censored
0
5
7
10	0
12	0
14	2
17	3
19	5
21	7
24	7
26	12
28	19
31	20
33	6
35	5
38	8
40	6
42
45
47
% fmo-4 KO rnai [104]
#days	dead	censored
0
5
7
10	0
12	6
14	6
17	13
19	12
21	16
24	16
26	13
28	10
31	8
33	3
35	1
38
40
42
45
47

## Sheet: vhl1 stats
% WT EV [115]						condition	chi	pvalue	corrected_pvalue
#days	dead	censored				WT EV v.s. fmo-4 OE EV	47.4	0	0
0						WT EV v.s. fmo-4 KO EV	0.03	0.8706	1
5						WT EV v.s. WT vhl	33.1	8.7e-09	4.4e-08
7						WT EV v.s. 4OE vhl1	31.14	2.4e-08	1.2e-07
10	0					WT EV v.s. fmo-4 KO vhl1	18.68	1.5e-05	0.0001
12	3					fmo-4 OE EV v.s. WT EV	47.4	0	0
14	4					fmo-4 OE EV v.s. fmo-4 KO EV	56.49	0	0
17	12					fmo-4 OE EV v.s. WT vhl	1.82	0.1773	0.8867
19	15					fmo-4 OE EV v.s. 4OE vhl1	3.12	0.0772	0.3858
21	20					fmo-4 OE EV v.s. fmo-4 KO vhl1	8.32	0.0039	0.0196
24	16					fmo-4 KO EV v.s. WT EV	0.03	0.8706	1
26	13					fmo-4 KO EV v.s. fmo-4 OE EV	56.49	0	0
28	10					fmo-4 KO EV v.s. WT vhl	39.18	0	0
31	8					fmo-4 KO EV v.s. 4OE vhl1	38.3	0	0
33	6					fmo-4 KO EV v.s. fmo-4 KO vhl1	21.36	3.8e-06	1.9e-05
35	8					WT vhl v.s. WT EV	33.1	8.7e-09	4.4e-08
38						WT vhl v.s. fmo-4 OE EV	1.82	0.1773	0.8867
40						WT vhl v.s. fmo-4 KO EV	39.18	0	0
42						WT vhl v.s. 4OE vhl1	0.17	0.6782	1
45						WT vhl v.s. fmo-4 KO vhl1	2.48	0.1155	0.5775
47						4OE vhl1 v.s. WT EV	31.14	2.4e-08	1.2e-07
						4OE vhl1 v.s. fmo-4 OE EV	3.12	0.0772	0.3858
% fmo-4 OE EV [107]						4OE vhl1 v.s. fmo-4 KO EV	38.3	0	0
#days	dead	censored				4OE vhl1 v.s. WT vhl	0.17	0.6782	1
0						4OE vhl1 v.s. fmo-4 KO vhl1	1.43	0.2319	1
5						fmo-4 KO vhl1 v.s. WT EV	18.68	1.5e-05	0.0001
7						fmo-4 KO vhl1 v.s. fmo-4 OE EV	8.32	0.0039	0.0196
10	0					fmo-4 KO vhl1 v.s. fmo-4 KO EV	21.36	3.8e-06	1.9e-05
12	1					fmo-4 KO vhl1 v.s. WT vhl	2.48	0.1155	0.5775
14	2					fmo-4 KO vhl1 v.s. 4OE vhl1	1.43	0.2319	1
17	2
19	2
21	8
24	6
26	12
28	11
31	19
33	22
35	4
38	8
40	10
42
45
47
% fmo-4 KO EV [105]
#days	dead	censored
0
5
7
10	0
12	2
14	2
17	7
19	14
21	11
24	21
26	23
28	6
31	14
33	3
35	2
38
40
42
45
47
% WT vhl [111]
#days	dead	censored
0
5
7
10	0
12	0
14	0
17	5
19	9
21	3
24	13
26	9
28	16
31	24
33	11
35	8
38	5
40	8
42
45
47
% 4OE vhl1 [108]
#days	dead	censored
0
5
7
10	0
12	0
14	1
17	6
19	4
21	5
24	9
26	13
28	19
31	20
33	11
35	10
38	5
40	5
42
45
47
% fmo-4 KO vhl1 [109]
#days	dead	censored
0
5
7
10	0
12	1
14	1
17	6
19	7
21	7
24	17
26	10
28	17
31	21
33	5
35	8
38	4
40	5
42
45
47

## Sheet: daf2 stats
% WT EV [115]					condition	chi	pvalue	corrected_pvalue
#days	dead	censored			WT EV v.s. fmo-4 OE EV	47.4	0	0
0					WT EV v.s. fmo-4 KO EV	0.03	0.8706	1
5					WT EV v.s. WT daf2	112.76	0	0
7					WT EV v.s. 4OE daf2	78.8	0	0
10	0				WT EV v.s. fmo-4 KO daf2	55.08	0	0
12	3				fmo-4 OE EV v.s. WT EV	47.4	0	0
14	4				fmo-4 OE EV v.s. fmo-4 KO EV	56.49	0	0
17	12				fmo-4 OE EV v.s. WT daf2	30.49	3.4e-08	1.7e-07
19	15				fmo-4 OE EV v.s. 4OE daf2	11.39	0.0007	0.0037
21	20				fmo-4 OE EV v.s. fmo-4 KO daf2	12.52	0.0004	0.002
24	16				fmo-4 KO EV v.s. WT EV	0.03	0.8706	1
26	13				fmo-4 KO EV v.s. fmo-4 OE EV	56.49	0	0
28	10				fmo-4 KO EV v.s. WT daf2	116.65	0	0
31	8				fmo-4 KO EV v.s. 4OE daf2	83.28	0	0
33	6				fmo-4 KO EV v.s. fmo-4 KO daf2	58.67	0	0
35	8				WT daf2 v.s. WT EV	112.76	0	0
38					WT daf2 v.s. fmo-4 OE EV	30.49	3.4e-08	1.7e-07
40					WT daf2 v.s. fmo-4 KO EV	116.65	0	0
42					WT daf2 v.s. 4OE daf2	4	0.0455	0.2277
45					WT daf2 v.s. fmo-4 KO daf2	0.4	0.5291	1
47					4OE daf2 v.s. WT EV	78.8	0	0
					4OE daf2 v.s. fmo-4 OE EV	11.39	0.0007	0.0037
% fmo-4 OE EV [107]					4OE daf2 v.s. fmo-4 KO EV	83.28	0	0
#days	dead	censored			4OE daf2 v.s. WT daf2	4	0.0455	0.2277
0					4OE daf2 v.s. fmo-4 KO daf2	0.8	0.3699	1
5					fmo-4 KO daf2 v.s. WT EV	55.08	0	0
7					fmo-4 KO daf2 v.s. fmo-4 OE EV	12.52	0.0004	0.002
10	0				fmo-4 KO daf2 v.s. fmo-4 KO EV	58.67	0	0
12	1				fmo-4 KO daf2 v.s. WT daf2	0.4	0.5291	1
14	2				fmo-4 KO daf2 v.s. 4OE daf2	0.8	0.3699	1
17	2
19	2
21	8
24	6
26	12
28	11
31	19
33	22
35	4
38	8
40	10
42
45
47
% fmo-4 KO EV [105]
#days	dead	censored
0
5
7
10	0
12	2
14	2
17	7
19	14
21	11
24	21
26	23
28	6
31	14
33	3
35	2
38
40
42
45
47
% WT daf2 [120]
#days	dead	censored
0
5
7
10	0
12	0
14	2
17	3
19	5
21	4
24	2
26	5
28	5
31	17
33	12
35	8
38	17
40	21
42	7
45	6
47	6
% 4OE daf2 [117]
#days	dead	censored
0
5
7
10	0
12	0
14	3
17	3
19	6
21	5
24	4
26	8
28	7
31	20
33	11
35	10
38	16
40	9
42	6
45	6
47	3
% fmo-4 KO daf2 [59]
#days	dead	censored
0
5
7
10	0
12	1
14	0
17	2
19	3
21	2
24	3
26	3
28	4
31	9
33	5
35	4
38	6
40	7
42	3
45	4
47	3

## Sheet: Sheet1
#1	N2								#1	N2					#1	N2
#2	Lei42	fmo-2p::MC; unc-119p::HIF-1(P621A); JT307 #1							#2	Lei42	fmo-2p::MC; unc-119p::HIF-1(P621A); JT307 #1				#11L	Lei51	fmo-2p::MC; JT307; gcy-31; gcy-36 - XA2262 sibling #1
#3	Lei43	fmo-2p::MC; unc-119p::HIF-1(P621A); JT307 #2							#3	Lei43	fmo-2p::MC; unc-119p::HIF-1(P621A); JT307 #2				#12L	Lei52	fmo-2p::MC; JT307; gcy-33; gcy-36 - XA2262 sibling #1
#4	Lei44	fmo-2p::MC; TU3311; CB5602 #1							#4	Lei44	fmo-2p::MC; TU3311; CB5602 #1				#13	Lei53	fmo-2p::MC; JT307; gcy-33; gcy-36 - XA2262 sibling #2
#5	Lei45	fmo-2p::MC; TU3311 #1							#5	Lei45	fmo-2p::MC; TU3311 #1				#14L	Lei55	fmo-2p::MC; JT307 - XA2262 sibling #1
#6	Lei46	fmo-2p::MC; CB5602 #1							#6	Lei46	fmo-2p::MC; CB5602 #1				#15L	Lei56	fmo-2p::MC; JT307 - XA2262 sibling #2
#7	Lei47	fmo-2p::MC; TU3311; CB5602 #2							#7	Lei47	fmo-2p::MC; TU3311; CB5602 #2				#16	Lei57	fmo-2p::MC - XA2262 sibling #1
#8L	Lei48	fmo-2p::MC; JT307; XA2262 #1													#17	Lei58	fmo-2p::MC - XA2262 sibling #2
#9	Lei49	fmo-2p::MC; JT307; XA2262 #2													#18	Lei59	fmo-2p::MC; gcy-33; gcy-36 - XA2262 sibling #1
#10L	Lei50	fmo-2p::MC; JT307; XA2262 #3							#1	N2					#19	Lei60	fmo-2p::MC; gcy-33; gcy-36 - XA2262 sibling #2
#11L	Lei51	fmo-2p::MC; JT307; gcy-31; gcy-36 - XA2262 sibling #1							#8L	Lei48	fmo-2p::MC; JT307; XA2262 #1
#12L	Lei52	fmo-2p::MC; JT307; gcy-33; gcy-36 - XA2262 sibling #1							#9	Lei49	fmo-2p::MC; JT307; XA2262 #2
#13	Lei53	fmo-2p::MC; JT307; gcy-33; gcy-36 - XA2262 sibling #2							#10L	Lei50	fmo-2p::MC; JT307; XA2262 #3
#14L	Lei55	fmo-2p::MC; JT307 - XA2262 sibling #1							#14L	Lei55	fmo-2p::MC; JT307 - XA2262 sibling #1
#15L	Lei56	fmo-2p::MC; JT307 - XA2262 sibling #2							#15L	Lei56	fmo-2p::MC; JT307 - XA2262 sibling #2
#16	Lei57	fmo-2p::MC - XA2262 sibling #1							#16	Lei57	fmo-2p::MC - XA2262 sibling #1
#17	Lei58	fmo-2p::MC - XA2262 sibling #2							#17	Lei58	fmo-2p::MC - XA2262 sibling #2
#18	Lei59	fmo-2p::MC; gcy-33; gcy-36 - XA2262 sibling #1							#20	Lei61	fmo-2p::MC; XA2262 #1
#19	Lei60	fmo-2p::MC; gcy-33; gcy-36 - XA2262 sibling #2							#21	Lei62	fmo-2p::MC; XA2262 #2
#20	Lei61	fmo-2p::MC; XA2262 #1
#21	Lei62	fmo-2p::MC; XA2262 #2
