# Supplementary material for: fmo-4 promotes longevity and stress resistance via ER to mitochondria calcium regulation in C. elegans
Source: eLife journal article supplement (doi:10.7554/elife.99971), 2024-08-27
Supplement: fig1-data5 [file elife-99971-fig1-data5-v1.zip]

## Sheet: lifespan
strain	day	alive	dead-total	dead-normal	dead-ruptured	censored	ratio-alive	percentage-alive
N2 EV	0	115	0				1	100
N2 EV	5	115	0				1	100
N2 EV	7	115	0				1	100						1	2	3	4	5	6	7	8	9	10	11	12	13	14	15
N2 EV	10	115	0	0			1	100			plot data here-->		day	WT; Empty Vector	FMO-4 OE	FMO-4 KO; Empty Vector	WT; cyc-1 RNAi	FMO-4 OE; cyc-1 RNAi	FMO-4 KO; cyc-1 RNAi	WT; daf-16	FMO-4 OE; daf-16	FMO-4 KO; daf-16	WT; mcu-1 RNAi	FMO-4 OE; mcu-1 RNAi	FMO-4 KO; mcu-1 RNAi	WT; rsks-1 RNAi	FMO-4 OE; rsks-1	FMO-4 KO; rsks-1 RNAi	4KO;rsks-1
N2 EV	12	114	1	1			0.991304	99.1304				0	0	100	100	100	100	100	100	100	100	100	100	100	100	100	100	100	100
N2 EV	14	110	5	4			0.956522	95.6522				5	5	100	100	100	100	100	100	100	100	100	100	100	100	100	100	100	100
N2 EV	17	102	13	8			0.886957	88.6957				7	7	100	100	100	100	100	100	100	100	100	100	100	100	100	100	100	100
N2 EV	19	93	22	9			0.808696	80.8696				10	10	100	100	100	100	100	100	100	100	100	100	100	100	100	100	100	100
N2 EV	21	72	43	21			0.626087	62.6087				12	12	99.1304	100	96.6292	99.0991	100	100	99.0291	100	93.578	97.7778	100	98.0769	100	98.5714	98.2301	98.2301
N2 EV	24	39	76	33			0.33913	33.913				14	14	95.6522	90	91.0112	98.1982	98.8235	96.6387	89.3204	83.3333	83.4862	95.5556	96.6102	94.2308	99.1597	97.1429	95.5752	95.5752
N2 EV	26	12	103	27			0.104348	10.4348				17	17	88.6957	90	86.5169	96.3964	96.4706	94.958	60.1942	55.5556	58.7156	88.8889	81.3559	76.9231	96.6387	91.4286	86.7257	86.7257
N2 EV	28	1	114	11			0.00869565	0.869565				19	19	80.8696	80	65.1685	94.5946	94.1176	90.7563	27.1845	33.3333	0	84.4444	67.7966	68.2692	94.958	85.7143	76.9912	76.9912
N2 EV	31	0	115	1			0	0				21	21	62.6087	73.3333	37.0787	90.991	90.5882	78.9916	0	19.4444		62.2222	61.0169	59.6154	93.2773	78.5714	63.7168	63.7168
N2 EV	33	0	115				0	0				24	24	33.913	66.6667	15.7303	81.0811	80	71.4286		8.33333		35.5556	45.7627	46.1538	86.5546	70	25.6637	25.6637
N2 EV	35	0	115				0	0				26	26	10.4348	56.6667	1.1236	70.2703	67.0588	53.7815		0		22.2222	30.5085	29.8077	80.6723	60	8.84956	8.84956
N2 EV	38	0	115				0	0				28	28	0.869565	46.6667	0	51.3514	41.1765	38.6555				8.88889	13.5593	18.2692	71.4286	51.4286	2.65487	2.65487
N2 EV	40	0	115				0	0				31	31	0	30		38.7387	30.5882	20.1681				0	5.08475	5.76923	51.2605	37.1429	0	0
N2 EV	42	0	115				0	0				33	33		16.6667		20.7207	18.8235	13.4454					0	0	14.2857	10
N2 EV	45	0	115				0	0				35	35		6.66667		10.8108	14.1176	4.20168							6.72269	5.71429
												38	38		0		4.5045	7.05882	0							0	0
4OE EV	0	30	0				1	100				40	40				0	0
4OE EV	5	30	0				1	100				42	42
4OE EV	7	30	0				1	100				45	45
4OE EV	10	30	0	0			1	100
4OE EV	12	30	0	0			1	100
4OE EV	14	27	3	3			0.9	90
4OE EV	17	27	3	0			0.9	90
4OE EV	19	24	6	3			0.8	80
4OE EV	21	22	8	2			0.733333	73.3333
4OE EV	24	20	10	2			0.666667	66.6667
4OE EV	26	17	13	3			0.566667	56.6667
4OE EV	28	14	16	3			0.466667	46.6667
4OE EV	31	9	21	5			0.3	30
4OE EV	33	5	25	4			0.166667	16.6667
4OE EV	35	2	28	3			0.0666667	6.66667
4OE EV	38	0	30	2			0	0
4OE EV	40	0	30				0	0
4OE EV	42	0	30				0	0
4OE EV	45	0	30				0	0
4KO EV	0	89	0				1	100
4KO EV	5	89	0				1	100
4KO EV	7	89	0				1	100
4KO EV	10	89	0	0			1	100
4KO EV	12	86	3	3			0.966292	96.6292
4KO EV	14	81	8	5			0.910112	91.0112
4KO EV	17	77	12	4			0.865169	86.5169
4KO EV	19	58	31	19			0.651685	65.1685
4KO EV	21	33	56	25			0.370787	37.0787
4KO EV	24	14	75	19			0.157303	15.7303
4KO EV	26	1	88	13			0.011236	1.1236
4KO EV	28	0	89	1			0	0
4KO EV	31	0	89				0	0
4KO EV	33	0	89				0	0
4KO EV	35	0	89				0	0
4KO EV	38	0	89				0	0
4KO EV	40	0	89				0	0
4KO EV	42	0	89				0	0
4KO EV	45	0	89				0	0
WT cyc1	0	111	0				1	100
WT cyc1	5	111	0				1	100
WT cyc1	7	111	0				1	100
WT cyc1	10	111	0	0			1	100
WT cyc1	12	110	1	1			0.990991	99.0991
WT cyc1	14	109	2	1			0.981982	98.1982
WT cyc1	17	107	4	2			0.963964	96.3964
WT cyc1	19	105	6	2			0.945946	94.5946
WT cyc1	21	101	10	4			0.90991	90.991
WT cyc1	24	90	21	11			0.810811	81.0811
WT cyc1	26	78	33	12			0.702703	70.2703
WT cyc1	28	57	54	21			0.513514	51.3514
WT cyc1	31	43	68	14			0.387387	38.7387
WT cyc1	33	23	88	20			0.207207	20.7207
WT cyc1	35	12	99	11			0.108108	10.8108
WT cyc1	38	5	106	7			0.045045	4.5045
WT cyc1	40	0	111	5			0	0
WT cyc1	42	0	111				0	0
WT cyc1	45	0	111				0	0
4OE cyc1	0	85	0				1	100
4OE cyc1	5	85	0				1	100
4OE cyc1	7	85	0				1	100
4OE cyc1	10	85	0	0			1	100
4OE cyc1	12	85	0	0			1	100
4OE cyc1	14	84	1	1			0.988235	98.8235
4OE cyc1	17	82	3	2			0.964706	96.4706
4OE cyc1	19	80	5	2			0.941176	94.1176
4OE cyc1	21	77	8	3			0.905882	90.5882
4OE cyc1	24	68	17	9			0.8	80
4OE cyc1	26	57	28	11			0.670588	67.0588
4OE cyc1	28	35	50	22			0.411765	41.1765
4OE cyc1	31	26	59	9			0.305882	30.5882
4OE cyc1	33	16	69	10			0.188235	18.8235
4OE cyc1	35	12	73	4			0.141176	14.1176
4OE cyc1	38	6	79	6			0.0705882	7.05882
4OE cyc1	40	0	85	6			0	0
4OE cyc1	42	0	85				0	0
4OE cyc1	45	0	85				0	0
4KO cyc1	0	119	0				1	100
4KO cyc1	5	119	0				1	100
4KO cyc1	7	119	0				1	100
4KO cyc1	10	119	0	0			1	100
4KO cyc1	12	119	0	0			1	100
4KO cyc1	14	115	4	4			0.966387	96.6387
4KO cyc1	17	113	6	2			0.94958	94.958
4KO cyc1	19	108	11	5			0.907563	90.7563
4KO cyc1	21	94	25	14			0.789916	78.9916
4KO cyc1	24	85	34	9			0.714286	71.4286
4KO cyc1	26	64	55	21			0.537815	53.7815
4KO cyc1	28	46	73	18			0.386555	38.6555
4KO cyc1	31	24	95	22			0.201681	20.1681
4KO cyc1	33	16	103	8			0.134454	13.4454
4KO cyc1	35	5	114	11			0.0420168	4.20168
4KO cyc1	38	0	119	5			0	0
4KO cyc1	40	0	119				0	0
4KO cyc1	42	0	119				0	0
4KO cyc1	45	0	119				0	0
WT daf16	0	103	0				1	100
WT daf16	5	103	0				1	100
WT daf16	7	103	0				1	100
WT daf16	10	103	0	0			1	100
WT daf16	12	102	1	1			0.990291	99.0291
WT daf16	14	92	11	10			0.893204	89.3204
WT daf16	17	62	41	30			0.601942	60.1942
WT daf16	19	28	75	34			0.271845	27.1845
WT daf16	21	0	103	28			0	0
WT daf16	24	0	103				0	0
WT daf16	26	0	103				0	0
WT daf16	28	0	103				0	0
WT daf16	31	0	103				0	0
WT daf16	33	0	103				0	0
WT daf16	35	0	103				0	0
WT daf16	38	0	103				0	0
WT daf16	40	0	103				0	0
WT daf16	42	0	103				0	0
WT daf16	45	0	103				0	0
4OE daf16	0	36	0				1	100
4OE daf16	5	36	0				1	100
4OE daf16	7	36	0				1	100
4OE daf16	10	36	0	0			1	100
4OE daf16	12	36	0	0			1	100
4OE daf16	14	30	6	6			0.833333	83.3333
4OE daf16	17	20	16	10			0.555556	55.5556
4OE daf16	19	12	24	8			0.333333	33.3333
4OE daf16	21	7	29	5			0.194444	19.4444
4OE daf16	24	3	33	4			0.0833333	8.33333
4OE daf16	26	0	36	3			0	0
4OE daf16	28	0	36				0	0
4OE daf16	31	0	36				0	0
4OE daf16	33	0	36				0	0
4OE daf16	35	0	36				0	0
4OE daf16	38	0	36				0	0
4OE daf16	40	0	36				0	0
4OE daf16	42	0	36				0	0
4OE daf16	45
4KO daf16	0	109	0				1	100
4KO daf16	5	109	0				1	100
4KO daf16	7	109	0				1	100
4KO daf16	10	109	0	0			1	100
4KO daf16	12	102	7	7			0.93578	93.578
4KO daf16	14	91	18	11			0.834862	83.4862
4KO daf16	17	64	45	27			0.587156	58.7156
4KO daf16	19	0	109	64			0	0
4KO daf16	21	0	109				0	0
4KO daf16	24	0	109				0	0
4KO daf16	26	0	109				0	0
4KO daf16	28	0	109				0	0
4KO daf16	31	0	109				0	0
4KO daf16	33	0	109				0	0
4KO daf16	35	0	109				0	0
4KO daf16	38	0	109				0	0
4KO daf16	40	0	109				0	0
4KO daf16	42	0	109				0	0
4KO daf16	45	0	109				0	0
4KO daf16	47	0	109				0	0
WT mcu1	0	45	0				1	100
WT mcu1	5	45	0				1	100
WT mcu1	7	45	0				1	100
WT mcu1	10	45	0	0			1	100
WT mcu1	12	44	1	1			0.977778	97.7778
WT mcu1	14	43	2	1			0.955556	95.5556
WT mcu1	17	40	5	3			0.888889	88.8889
WT mcu1	19	38	7	2			0.844444	84.4444
WT mcu1	21	28	17	10			0.622222	62.2222
WT mcu1	24	16	29	12			0.355556	35.5556
WT mcu1	26	10	35	6			0.222222	22.2222
WT mcu1	28	4	41	6			0.0888889	8.88889
WT mcu1	31	0	45	4			0	0
WT mcu1	33	0	45				0	0
WT mcu1	35	0	45				0	0
WT mcu1	38	0	45				0	0
WT mcu1	40	0	45				0	0
WT mcu1	42	0	45				0	0
	45
4OE mcu1	0	59	0				1	100
4OE mcu1	5	59	0				1	100
4OE mcu1	7	59	0				1	100
4OE mcu1	10	59	0	0			1	100
4OE mcu1	12	59	0	0			1	100
4OE mcu1	14	57	2	2			0.966102	96.6102
4OE mcu1	17	48	11	9			0.813559	81.3559
4OE mcu1	19	40	19	8			0.677966	67.7966
4OE mcu1	21	36	23	4			0.610169	61.0169
4OE mcu1	24	27	32	9			0.457627	45.7627
4OE mcu1	26	18	41	9			0.305085	30.5085
4OE mcu1	28	8	51	10			0.135593	13.5593
4OE mcu1	31	3	56	5			0.0508475	5.08475
4OE mcu1	33	0	59	3			0	0
4OE mcu1	35	0	59				0	0
4OE mcu1	38	0	59				0	0
4OE mcu1	40	0	59				0	0
4OE mcu1	42	0	59				0	0
4OE mcu1	45
4KO mcu1	0	104	0				1	100
4KO mcu1	5	104	0				1	100
4KO mcu1	7	104	0				1	100
4KO mcu1	10	104	0	0			1	100
4KO mcu1	12	102	2	2			0.980769	98.0769
4KO mcu1	14	98	6	4			0.942308	94.2308
4KO mcu1	17	80	24	18			0.769231	76.9231
4KO mcu1	19	71	33	9			0.682692	68.2692
4KO mcu1	21	62	42	9			0.596154	59.6154
4KO mcu1	24	48	56	14			0.461538	46.1538
4KO mcu1	26	31	73	17			0.298077	29.8077
4KO mcu1	28	19	85	12			0.182692	18.2692
4KO mcu1	31	6	98	13			0.0576923	5.76923
4KO mcu1	33	0	104	6			0	0
4KO mcu1	35	0	104				0	0
4KO mcu1	38	0	104				0	0
4KO mcu1	40	0	104				0	0
4KO mcu1	42	0	104				0	0
4KO mcu1	45
WT rsks1	0	119	0				1	100
WT rsks1	5	119	0				1	100
WT rsks1	7	119	0				1	100
WT rsks1	10	119	0	0			1	100
WT rsks1	12	119	0	0			1	100
WT rsks1	14	118	1	1			0.991597	99.1597
WT rsks1	17	115	4	3			0.966387	96.6387
WT rsks1	19	113	6	2			0.94958	94.958
WT rsks1	21	111	8	2			0.932773	93.2773
WT rsks1	24	103	16	8			0.865546	86.5546
WT rsks1	26	96	23	7			0.806723	80.6723
WT rsks1	28	85	34	11			0.714286	71.4286
WT rsks1	31	61	58	24			0.512605	51.2605
WT rsks1	33	17	102	44			0.142857	14.2857
WT rsks1	35	8	111	9			0.0672269	6.72269
WT rsks1	38	0	119	8			0	0
WT rsks1	40	0	119				0	0
WT rsks1	42	0	119				0	0
WT rsks1	45	0	119				0	0
4OE rsks1	0	70	0				1	100
4OE rsks1	5	70	0				1	100
4OE rsks1	7	70	0				1	100
4OE rsks1	10	70	0	0			1	100
4OE rsks1	12	69	1	1			0.985714	98.5714
4OE rsks1	14	68	2	1			0.971429	97.1429
4OE rsks1	17	64	6	4			0.914286	91.4286
4OE rsks1	19	60	10	4			0.857143	85.7143
4OE rsks1	21	55	15	5			0.785714	78.5714
4OE rsks1	24	49	21	6			0.7	70
4OE rsks1	26	42	28	7			0.6	60
4OE rsks1	28	36	34	6			0.514286	51.4286
4OE rsks1	31	26	44	10			0.371429	37.1429
4OE rsks1	33	7	63	19			0.1	10
4OE rsks1	35	4	66	3			0.0571429	5.71429
4OE rsks1	38	0	70	4			0	0
4OE rsks1	40	0	70				0	0
4OE rsks1	42	0	70				0	0
4OE rsks1	45
4KO rsks1	0	113	0				1	100
4KO rsks1	5	113	0				1	100
4KO rsks1	7	113	0				1	100
4KO rsks1	10	113	0	0			1	100
4KO rsks1	12	111	2	2			0.982301	98.2301
4KO rsks1	14	108	5	3			0.955752	95.5752
4KO rsks1	17	98	15	10			0.867257	86.7257
4KO rsks1	19	87	26	11			0.769912	76.9912
4KO rsks1	21	72	41	15			0.637168	63.7168
4KO rsks1	24	29	84	43			0.256637	25.6637
4KO rsks1	26	10	103	19			0.0884956	8.84956
4KO rsks1	28	3	110	7			0.0265487	2.65487
4KO rsks1	31	0	113	3			0	0
4KO rsks1	33	0	113				0	0
4KO rsks1	35	0	113				0	0
4KO rsks1	38	0	113				0	0
4KO rsks1	40	0	113				0	0
4KO rsks1	42	0	113			0	0	0
4KO rsks1	45
4KO sams1	0	83	0			0	1	100
4KO sams1	5	83	0			0	1	100
4KO sams1	7	83	0			0	1	100
4KO sams1	10	83	0			0	1	100
4KO sams1	12	83	0			0	1	100
4KO sams1	14	83	0			0	1	100
4KO sams1	17	83	0			0	1	100
4KO sams1	19	83	0			0	1	100
4KO sams1	21	83	0			0	1	100
4KO sams1	24	83	0			0	1	100
4KO sams1	26	83	0			0	1	100
4KO sams1	28	83	0			0	1	100
4KO sams1	31	83	0			0	1	100
4KO sams1	33	83	0			0	1	100
4KO sams1	35	83	0			0	1	100
4KO sams1	38	83	0			0	1	100
4KO sams1	40	83	0			0	1	100
4KO sams1	42	83	0			0	1	100
4KO sams1	45	134	0			0	1	100
1OE sams1	0	114	0			0	1	100
1OE sams1	5	114	0			0	1	100
1OE sams1	7	114	0			0	1	100
1OE sams1	10	114	0			0	1	100
1OE sams1	12	114	0			0	1	100
1OE sams1	14	114	0			0	1	100
1OE sams1	17	114	0			0	1	100
1OE sams1	19	114	0			0	1	100
1OE sams1	21	114	0			0	1	100
1OE sams1	24	114	0			0	1	100
1OE sams1	26	114	0			0	1	100
1OE sams1	28	114	0			0	1	100
1OE sams1	31	114	0			0	1	100
1OE sams1	33	114	0			0	1	100
1OE sams1	35	114	0			0	1	100
1OE sams1	38	114	0			0	1	100
1OE sams1	40	114	0			0	1	100
1OE sams1	42	114	0			0	1	100
1OE sams1	45	114	0			0	1	100
1KO sams1	0	83	0			0	1	100
1KO sams1	5	83	0			0	1	100
1KO sams1	7	83	0			0	1	100
1KO sams1	9	83	0			0	1	100
1KO sams1	13	83	0			0	1	100
1KO sams1	15	83	0			0	1	100
1KO sams1	17	83	0			0	1	100
1KO sams1	20	83	0			0	1	100
1KO sams1	22	83	0			0	1	100
1KO sams1	24	83	0			0	1	100
1KO sams1	27	83	0			0	1	100
1KO sams1	29	83	0			0	1	100
1KO sams1	31	83	0			0	1	100
1KO sams1	34	83	0			0	1	100
1KO sams1	36	83	0			0	1	100
1KO sams1	38	83	0			0	1	100
1KO sams1	41	83	0			0	1	100
1KO sams1	43	83	0			0	1	100
1KO sams1	45	83	0			0	1	100
							0

## Sheet: cyc1
% WT EV [115]						condition	chi	pvalue	corrected_pvalue
#days	dead	censored				WT EV v.s. fmo-4 OE EV	28	1.2e-07	6.1e-07
0						WT EV v.s. fmo-4 KO EV	15.94	0.0001	0.0003
5						WT EV v.s. WT cyc1	104.49	0	0
7						WT EV v.s. fmo-4 OE cyc1	79.27	0	0
10	0					WT EV v.s. fmo-4 ko cyc1	62.04	0	0
12	1					fmo-4 OE EV v.s. WT EV	28	1.2e-07	6.1e-07
14	4					fmo-4 OE EV v.s. fmo-4 KO EV	34.55	4.2e-09	2.1e-08
17	8					fmo-4 OE EV v.s. WT cyc1	1.96	0.1613	0.8067
19	9					fmo-4 OE EV v.s. fmo-4 OE cyc1	1.26	0.2624	1
21	21					fmo-4 OE EV v.s. fmo-4 ko cyc1	0.29	0.59	1
24	33					fmo-4 KO EV v.s. WT EV	15.94	0.0001	0.0003
26	27					fmo-4 KO EV v.s. fmo-4 OE EV	34.55	4.2e-09	2.1e-08
28	11					fmo-4 KO EV v.s. WT cyc1	130.2	0	0
31	1					fmo-4 KO EV v.s. fmo-4 OE cyc1	104.69	0	0
33						fmo-4 KO EV v.s. fmo-4 ko cyc1	89.64	0	0
35						WT cyc1 v.s. WT EV	104.49	0	0
38						WT cyc1 v.s. fmo-4 OE EV	1.96	0.1613	0.8067
40						WT cyc1 v.s. fmo-4 KO EV	130.2	0	0
42						WT cyc1 v.s. fmo-4 OE cyc1	0.1	0.7562	1
45						WT cyc1 v.s. fmo-4 ko cyc1	9.36	0.0022	0.0111
						fmo-4 OE cyc1 v.s. WT EV	79.27	0	0
% fmo-4 OE EV [30]						fmo-4 OE cyc1 v.s. fmo-4 OE EV	1.26	0.2624	1
#days	dead	censored				fmo-4 OE cyc1 v.s. fmo-4 KO EV	104.69	0	0
0						fmo-4 OE cyc1 v.s. WT cyc1	0.1	0.7562	1
5						fmo-4 OE cyc1 v.s. fmo-4 ko cyc1	5.67	0.0172	0.0861
7						fmo-4 ko cyc1 v.s. WT EV	62.04	0	0
10	0					fmo-4 ko cyc1 v.s. fmo-4 OE EV	0.29	0.59	1
12	0					fmo-4 ko cyc1 v.s. fmo-4 KO EV	89.64	0	0
14	3					fmo-4 ko cyc1 v.s. WT cyc1	9.36	0.0022	0.0111
17	0					fmo-4 ko cyc1 v.s. fmo-4 OE cyc1	5.67	0.0172	0.0861
19	3
21	2
24	2
26	3
28	3
31	5
33	4
35	3
38	2
40
42
45
% fmo-4 KO EV [89]
#days	dead	censored
0
5
7
10	0
12	3
14	5
17	4
19	19
21	25
24	19
26	13
28	1
31
33
35
38
40
42
45
% WT cyc1 [111]
#days	dead	censored
0
5
7
10	0
12	1
14	1
17	2
19	2
21	4
24	11
26	12
28	21
31	14
33	20
35	11
38	7
40	5
42
45
% fmo-4 OE cyc1 [85]
#days	dead	censored
0
5
7
10	0
12	0
14	1
17	2
19	2
21	3
24	9
26	11
28	22
31	9
33	10
35	4
38	6
40	6
42
45
% fmo-4 ko cyc1 [119]
#days	dead	censored
0
5
7
10	0
12	0
14	4
17	2
19	5
21	14
24	9
26	21
28	18
31	22
33	8
35	11
38	5
40
42
45

## Sheet: mcu1
% WT EV [115]					condition	chi	pvalue	corrected_pvalue
#days	dead	censored			WT EV v.s. fmo-4 OE EV	28	1.2e-07	6.1e-07
0					WT EV v.s. fmo-4 KO EV	15.94	0.0001	0.0003
5					WT EV v.s. WT mcu1	1.91	0.1669	0.8346
7					WT EV v.s. fmo-4 OE mcu1	5.77	0.0163	0.0814
10	0				WT EV v.s. fmo-4 ko mcu1	7.79	0.0053	0.0263
12	1				fmo-4 OE EV v.s. WT EV	28	1.2e-07	6.1e-07
14	4				fmo-4 OE EV v.s. fmo-4 KO EV	34.55	4.2e-09	2.1e-08
17	8				fmo-4 OE EV v.s. WT mcu1	13.54	0.0002	0.0012
19	9				fmo-4 OE EV v.s. fmo-4 OE mcu1	11.48	0.0007	0.0035
21	21				fmo-4 OE EV v.s. fmo-4 ko mcu1	13.16	0.0003	0.0014
24	33				fmo-4 KO EV v.s. WT EV	15.94	0.0001	0.0003
26	27				fmo-4 KO EV v.s. fmo-4 OE EV	34.55	4.2e-09	2.1e-08
28	11				fmo-4 KO EV v.s. WT mcu1	14.57	0.0001	0.0007
31	1				fmo-4 KO EV v.s. fmo-4 OE mcu1	18.4	1.8e-05	0.0001
33					fmo-4 KO EV v.s. fmo-4 ko mcu1	22.15	2.5e-06	1.3e-05
35					WT mcu1 v.s. WT EV	1.91	0.1669	0.8346
38					WT mcu1 v.s. fmo-4 OE EV	13.54	0.0002	0.0012
40					WT mcu1 v.s. fmo-4 KO EV	14.57	0.0001	0.0007
42					WT mcu1 v.s. fmo-4 OE mcu1	0.64	0.4234	1
45					WT mcu1 v.s. fmo-4 ko mcu1	1.07	0.3007	1
					fmo-4 OE mcu1 v.s. WT EV	5.77	0.0163	0.0814
% fmo-4 OE EV [30]					fmo-4 OE mcu1 v.s. fmo-4 OE EV	11.48	0.0007	0.0035
#days	dead	censored			fmo-4 OE mcu1 v.s. fmo-4 KO EV	18.4	1.8e-05	0.0001
0					fmo-4 OE mcu1 v.s. WT mcu1	0.64	0.4234	1
5					fmo-4 OE mcu1 v.s. fmo-4 ko mcu1	0.03	0.8639	1
7					fmo-4 ko mcu1 v.s. WT EV	7.79	0.0053	0.0263
10	0				fmo-4 ko mcu1 v.s. fmo-4 OE EV	13.16	0.0003	0.0014
12	0				fmo-4 ko mcu1 v.s. fmo-4 KO EV	22.15	2.5e-06	1.3e-05
14	3				fmo-4 ko mcu1 v.s. WT mcu1	1.07	0.3007	1
17	0				fmo-4 ko mcu1 v.s. fmo-4 OE mcu1	0.03	0.8639	1
19	3
21	2
24	2
26	3
28	3
31	5
33	4
35	3
38	2
40
42
45
% fmo-4 KO EV [89]
#days	dead	censored
0
5
7
10	0
12	3
14	5
17	4
19	19
21	25
24	19
26	13
28	1
31
33
35
38
40
42
45
% WT mcu1 [45]
#days	dead	censored
0
5
7
10	0
12	1
14	1
17	3
19	2
21	10
24	12
26	6
28	6
31	4
33
35
38
40
42
45
% fmo-4 OE mcu1 [59]
#days	dead	censored
0
5
7
10	0
12	0
14	2
17	9
19	8
21	4
24	9
26	9
28	10
31	5
33	3
35
38
40
42
45
% fmo-4 ko mcu1 [104]
#days	dead	censored
0
5
7
10	0
12	2
14	4
17	18
19	9
21	9
24	14
26	17
28	12
31	13
33	6
35
38
40
42
45

## Sheet: rsks1
% WT EV [115]						condition	chi	pvalue	corrected_pvalue
#days	dead	censored				WT EV v.s. fmo-4 OE EV	28	1.2e-07	6.1e-07
0						WT EV v.s. fmo-4 KO EV	15.94	0.0001	0.0003
5						WT EV v.s. WT rsks1	149.33	0	0
7						WT EV v.s. fmo-4 OE rsks1	55.09	0	0
10	0					WT EV v.s. fmo-4 ko rsks1	0.31	0.578	1
12	1					fmo-4 OE EV v.s. WT EV	28	1.2e-07	6.1e-07
14	4					fmo-4 OE EV v.s. fmo-4 KO EV	34.55	4.2e-09	2.1e-08
17	8					fmo-4 OE EV v.s. WT rsks1	3.7	0.0543	0.2714
19	9					fmo-4 OE EV v.s. fmo-4 OE rsks1	0.06	0.8127	1
21	21					fmo-4 OE EV v.s. fmo-4 ko rsks1	28.28	1e-07	5.2e-07
24	33					fmo-4 KO EV v.s. WT EV	15.94	0.0001	0.0003
26	27					fmo-4 KO EV v.s. fmo-4 OE EV	34.55	4.2e-09	2.1e-08
28	11					fmo-4 KO EV v.s. WT rsks1	163.67	0	0
31	1					fmo-4 KO EV v.s. fmo-4 OE rsks1	66.4	0	0
33						fmo-4 KO EV v.s. fmo-4 ko rsks1	11.3	0.0008	0.0039
35						WT rsks1 v.s. WT EV	149.33	0	0
38						WT rsks1 v.s. fmo-4 OE EV	3.7	0.0543	0.2714
40						WT rsks1 v.s. fmo-4 KO EV	163.67	0	0
42						WT rsks1 v.s. fmo-4 OE rsks1	5.02	0.0251	0.1255
45						WT rsks1 v.s. fmo-4 ko rsks1	149.59	0	0
						fmo-4 OE rsks1 v.s. WT EV	55.09	0	0
% fmo-4 OE EV [30]						fmo-4 OE rsks1 v.s. fmo-4 OE EV	0.06	0.8127	1
#days	dead	censored				fmo-4 OE rsks1 v.s. fmo-4 KO EV	66.4	0	0
0						fmo-4 OE rsks1 v.s. WT rsks1	5.02	0.0251	0.1255
5						fmo-4 OE rsks1 v.s. fmo-4 ko rsks1	56.43	0	0
7						fmo-4 ko rsks1 v.s. WT EV	0.31	0.578	1
10	0					fmo-4 ko rsks1 v.s. fmo-4 OE EV	28.28	1e-07	5.2e-07
12	0					fmo-4 ko rsks1 v.s. fmo-4 KO EV	11.3	0.0008	0.0039
14	3					fmo-4 ko rsks1 v.s. WT rsks1	149.59	0	0
17	0					fmo-4 ko rsks1 v.s. fmo-4 OE rsks1	56.43	0	0
19	3
21	2
24	2
26	3
28	3
31	5
33	4
35	3
38	2
40
42
45
% fmo-4 KO EV [89]
#days	dead	censored
0
5
7
10	0
12	3
14	5
17	4
19	19
21	25
24	19
26	13
28	1
31
33
35
38
40
42
45
% WT rsks1 [119]
#days	dead	censored
0
5
7
10	0
12	0
14	1
17	3
19	2
21	2
24	8
26	7
28	11
31	24
33	44
35	9
38	8
40
42
45
% fmo-4 OE rsks1 [70]
#days	dead	censored
0
5
7
10	0
12	1
14	1
17	4
19	4
21	5
24	6
26	7
28	6
31	10
33	19
35	3
38	4
40
42
45
% fmo-4 ko rsks1 [113]
#days	dead	censored
0
5
7
10	0
12	2
14	3
17	10
19	11
21	15
24	43
26	19
28	7
31	3
33
35
38
40
42
45

## Sheet: vhl1 stats
% WT EV [115]						condition	chi	pvalue	corrected_pvalue
#days	dead	censored				WT EV v.s. fmo-4 OE EV	28	1.2e-07	6.1e-07
0						WT EV v.s. fmo-4 KO EV	15.94	0.0001	0.0003
5						WT EV v.s. WT cyc1	104.49	0	0
7						WT EV v.s. fmo-4 OE cyc1	79.27	0	0
10	0					WT EV v.s. fmo-4 ko cyc1	62.04	0	0
12	1					fmo-4 OE EV v.s. WT EV	28	1.2e-07	6.1e-07
14	4					fmo-4 OE EV v.s. fmo-4 KO EV	34.55	4.2e-09	2.1e-08
17	8					fmo-4 OE EV v.s. WT cyc1	1.96	0.1613	0.8067
19	9					fmo-4 OE EV v.s. fmo-4 OE cyc1	1.26	0.2624	1
21	21					fmo-4 OE EV v.s. fmo-4 ko cyc1	0.29	0.59	1
24	33					fmo-4 KO EV v.s. WT EV	15.94	0.0001	0.0003
26	27					fmo-4 KO EV v.s. fmo-4 OE EV	34.55	4.2e-09	2.1e-08
28	11					fmo-4 KO EV v.s. WT cyc1	130.2	0	0
31	1					fmo-4 KO EV v.s. fmo-4 OE cyc1	104.69	0	0
33						fmo-4 KO EV v.s. fmo-4 ko cyc1	89.64	0	0
35						WT cyc1 v.s. WT EV	104.49	0	0
38						WT cyc1 v.s. fmo-4 OE EV	1.96	0.1613	0.8067
40						WT cyc1 v.s. fmo-4 KO EV	130.2	0	0
42						WT cyc1 v.s. fmo-4 OE cyc1	0.1	0.7562	1
45						WT cyc1 v.s. fmo-4 ko cyc1	9.36	0.0022	0.0111
						fmo-4 OE cyc1 v.s. WT EV	79.27	0	0
% fmo-4 OE EV [30]						fmo-4 OE cyc1 v.s. fmo-4 OE EV	1.26	0.2624	1
#days	dead	censored				fmo-4 OE cyc1 v.s. fmo-4 KO EV	104.69	0	0
0						fmo-4 OE cyc1 v.s. WT cyc1	0.1	0.7562	1
5						fmo-4 OE cyc1 v.s. fmo-4 ko cyc1	5.67	0.0172	0.0861
7						fmo-4 ko cyc1 v.s. WT EV	62.04	0	0
10	0					fmo-4 ko cyc1 v.s. fmo-4 OE EV	0.29	0.59	1
12	0					fmo-4 ko cyc1 v.s. fmo-4 KO EV	89.64	0	0
14	3					fmo-4 ko cyc1 v.s. WT cyc1	9.36	0.0022	0.0111
17	0					fmo-4 ko cyc1 v.s. fmo-4 OE cyc1	5.67	0.0172	0.0861
19	3
21	2
24	2
26	3
28	3
31	5
33	4
35	3
38	2
40
42
45
% fmo-4 KO EV [89]
#days	dead	censored
0
5
7
10	0
12	3
14	5
17	4
19	19
21	25
24	19
26	13
28	1
31
33
35
38
40
42
45
% WT cyc1 [111]
#days	dead	censored
0
5
7
10	0
12	1
14	1
17	2
19	2
21	4
24	11
26	12
28	21
31	14
33	20
35	11
38	7
40	5
42
45
% fmo-4 OE cyc1 [85]
#days	dead	censored
0
5
7
10	0
12	0
14	1
17	2
19	2
21	3
24	9
26	11
28	22
31	9
33	10
35	4
38	6
40	6
42
45
% fmo-4 ko cyc1 [119]
#days	dead	censored
0
5
7
10	0
12	0
14	4
17	2
19	5
21	14
24	9
26	21
28	18
31	22
33	8
35	11
38	5
40
42
45

## Sheet: daf2 stats
% WT EV [115]					condition	chi	pvalue	corrected_pvalue
#days	dead	censored			WT EV v.s. fmo-4 OE EV	28	1.2e-07	6.1e-07
0					WT EV v.s. fmo-4 KO EV	15.94	0.0001	0.0003
5					WT EV v.s. WT mcu1	1.91	0.1669	0.8346
7					WT EV v.s. fmo-4 OE mcu1	5.77	0.0163	0.0814
10	0				WT EV v.s. fmo-4 ko mcu1	7.79	0.0053	0.0263
12	1				fmo-4 OE EV v.s. WT EV	28	1.2e-07	6.1e-07
14	4				fmo-4 OE EV v.s. fmo-4 KO EV	34.55	4.2e-09	2.1e-08
17	8				fmo-4 OE EV v.s. WT mcu1	13.54	0.0002	0.0012
19	9				fmo-4 OE EV v.s. fmo-4 OE mcu1	11.48	0.0007	0.0035
21	21				fmo-4 OE EV v.s. fmo-4 ko mcu1	13.16	0.0003	0.0014
24	33				fmo-4 KO EV v.s. WT EV	15.94	0.0001	0.0003
26	27				fmo-4 KO EV v.s. fmo-4 OE EV	34.55	4.2e-09	2.1e-08
28	11				fmo-4 KO EV v.s. WT mcu1	14.57	0.0001	0.0007
31	1				fmo-4 KO EV v.s. fmo-4 OE mcu1	18.4	1.8e-05	0.0001
33					fmo-4 KO EV v.s. fmo-4 ko mcu1	22.15	2.5e-06	1.3e-05
35					WT mcu1 v.s. WT EV	1.91	0.1669	0.8346
38					WT mcu1 v.s. fmo-4 OE EV	13.54	0.0002	0.0012
40					WT mcu1 v.s. fmo-4 KO EV	14.57	0.0001	0.0007
42					WT mcu1 v.s. fmo-4 OE mcu1	0.64	0.4234	1
45					WT mcu1 v.s. fmo-4 ko mcu1	1.07	0.3007	1
					fmo-4 OE mcu1 v.s. WT EV	5.77	0.0163	0.0814
% fmo-4 OE EV [30]					fmo-4 OE mcu1 v.s. fmo-4 OE EV	11.48	0.0007	0.0035
#days	dead	censored			fmo-4 OE mcu1 v.s. fmo-4 KO EV	18.4	1.8e-05	0.0001
0					fmo-4 OE mcu1 v.s. WT mcu1	0.64	0.4234	1
5					fmo-4 OE mcu1 v.s. fmo-4 ko mcu1	0.03	0.8639	1
7					fmo-4 ko mcu1 v.s. WT EV	7.79	0.0053	0.0263
10	0				fmo-4 ko mcu1 v.s. fmo-4 OE EV	13.16	0.0003	0.0014
12	0				fmo-4 ko mcu1 v.s. fmo-4 KO EV	22.15	2.5e-06	1.3e-05
14	3				fmo-4 ko mcu1 v.s. WT mcu1	1.07	0.3007	1
17	0				fmo-4 ko mcu1 v.s. fmo-4 OE mcu1	0.03	0.8639	1
19	3
21	2
24	2
26	3
28	3
31	5
33	4
35	3
38	2
40
42
45
% fmo-4 KO EV [89]
#days	dead	censored
0
5
7
10	0
12	3
14	5
17	4
19	19
21	25
24	19
26	13
28	1
31
33
35
38
40
42
45
% WT mcu1 [45]
#days	dead	censored
0
5
7
10	0
12	1
14	1
17	3
19	2
21	10
24	12
26	6
28	6
31	4
33
35
38
40
42
45
% fmo-4 OE mcu1 [59]
#days	dead	censored
0
5
7
10	0
12	0
14	2
17	9
19	8
21	4
24	9
26	9
28	10
31	5
33	3
35
38
40
42
45
% fmo-4 ko mcu1 [104]
#days	dead	censored
0
5
7
10	0
12	2
14	4
17	18
19	9
21	9
24	14
26	17
28	12
31	13
33	6
35
38
40
42
45

## Sheet: Sheet1
#1	N2								#1	N2					#1	N2
#2	Lei42	fmo-2p::MC; unc-119p::HIF-1(P621A); JT307 #1							#2	Lei42	fmo-2p::MC; unc-119p::HIF-1(P621A); JT307 #1				#11L	Lei51	fmo-2p::MC; JT307; gcy-31; gcy-36 - XA2262 sibling #1
#3	Lei43	fmo-2p::MC; unc-119p::HIF-1(P621A); JT307 #2							#3	Lei43	fmo-2p::MC; unc-119p::HIF-1(P621A); JT307 #2				#12L	Lei52	fmo-2p::MC; JT307; gcy-33; gcy-36 - XA2262 sibling #1
#4	Lei44	fmo-2p::MC; TU3311; CB5602 #1							#4	Lei44	fmo-2p::MC; TU3311; CB5602 #1				#13	Lei53	fmo-2p::MC; JT307; gcy-33; gcy-36 - XA2262 sibling #2
#5	Lei45	fmo-2p::MC; TU3311 #1							#5	Lei45	fmo-2p::MC; TU3311 #1				#14L	Lei55	fmo-2p::MC; JT307 - XA2262 sibling #1
#6	Lei46	fmo-2p::MC; CB5602 #1							#6	Lei46	fmo-2p::MC; CB5602 #1				#15L	Lei56	fmo-2p::MC; JT307 - XA2262 sibling #2
#7	Lei47	fmo-2p::MC; TU3311; CB5602 #2							#7	Lei47	fmo-2p::MC; TU3311; CB5602 #2				#16	Lei57	fmo-2p::MC - XA2262 sibling #1
#8L	Lei48	fmo-2p::MC; JT307; XA2262 #1													#17	Lei58	fmo-2p::MC - XA2262 sibling #2
#9	Lei49	fmo-2p::MC; JT307; XA2262 #2													#18	Lei59	fmo-2p::MC; gcy-33; gcy-36 - XA2262 sibling #1
#10L	Lei50	fmo-2p::MC; JT307; XA2262 #3							#1	N2					#19	Lei60	fmo-2p::MC; gcy-33; gcy-36 - XA2262 sibling #2
#11L	Lei51	fmo-2p::MC; JT307; gcy-31; gcy-36 - XA2262 sibling #1							#8L	Lei48	fmo-2p::MC; JT307; XA2262 #1
#12L	Lei52	fmo-2p::MC; JT307; gcy-33; gcy-36 - XA2262 sibling #1							#9	Lei49	fmo-2p::MC; JT307; XA2262 #2
#13	Lei53	fmo-2p::MC; JT307; gcy-33; gcy-36 - XA2262 sibling #2							#10L	Lei50	fmo-2p::MC; JT307; XA2262 #3
#14L	Lei55	fmo-2p::MC; JT307 - XA2262 sibling #1							#14L	Lei55	fmo-2p::MC; JT307 - XA2262 sibling #1
#15L	Lei56	fmo-2p::MC; JT307 - XA2262 sibling #2							#15L	Lei56	fmo-2p::MC; JT307 - XA2262 sibling #2
#16	Lei57	fmo-2p::MC - XA2262 sibling #1							#16	Lei57	fmo-2p::MC - XA2262 sibling #1
#17	Lei58	fmo-2p::MC - XA2262 sibling #2							#17	Lei58	fmo-2p::MC - XA2262 sibling #2
#18	Lei59	fmo-2p::MC; gcy-33; gcy-36 - XA2262 sibling #1							#20	Lei61	fmo-2p::MC; XA2262 #1
#19	Lei60	fmo-2p::MC; gcy-33; gcy-36 - XA2262 sibling #2							#21	Lei62	fmo-2p::MC; XA2262 #2
#20	Lei61	fmo-2p::MC; XA2262 #1
#21	Lei62	fmo-2p::MC; XA2262 #2
