# Supplementary material for: fmo-4 promotes longevity and stress resistance via ER to mitochondria calcium regulation in C. elegans
Source: eLife journal article supplement (doi:10.7554/elife.99971), 2024-08-27
Supplement: fig2-data1 [file APR2021 fmo4 fmo1 lifespan 2O4K.xlsx]

## Sheet: data
strain	day	alive	dead-total	dead-normal	dead-ruptured	censored	ratio-alive	percentage-alive
N2	0	73	0	0	0	0	1	100
N2	5	73	0	0	0	0	1	100
N2	7	73	0	0	0	0	1	100						1	2	3	4	5	6	7
N2	10	73	0	0	0	0	1	100			plot data here-->		day	WT	fmo-1	fmo-2	fmo-4	fmo-2 OE	fmo-4 OE	fmo-2O; -1K	fmo-2O; -4O	fmo-2O; -4K	fmo-2O; -4O; -1K		fmo-2O; -4O; -1K	fmo-2	fmo-2 OE	fmo-2O; -1K	N2	fmo-4 OE	fmo-1	fmo-2O; -4O	fmo-4
N2	12	73	0	0	0	0	1	100				0	0	100	100	100	100	100	100	100	100	100	100		100	100	100	100	100	100	100	100	100
N2	14	68	5	5		0	0.931507	93.1507				5	5	100	100	100	100	100	100	100	100	100	100		100	100	100	100	100	100	100	100	100
N2	17	62	11	6		0	0.849315	84.9315				7	7	100	100	100	100	100	100	100	100	100	100		100	100	100	100	100	100	100	100	100
N2	19	57	16	5		0	0.780822	78.0822				10	10	100	100	100	100	100	100	100	100	100	100		100	100	100	100	100	100	100	100	100
N2	21	43	30	14		0	0.589041	58.9041				12	12	100	97.8723	97.6471	97.6471	98.7654	99.0099	98.4375	97.0874	96.0784	98.9247		98.5612	99.1667	99.2308	93.75	97.4359	97.6744	97.2789	100	98
N2	24	16	57	27		0	0.219178	21.9178				14	14	93.1507	91.4894	94.1176	92.9412	93.8272	97.0297	95.3125	96.1165	92.1569	95.6989		97.8417	94.1667	99.2308	91.6667	94.8718	95.3488	93.8776	100	97
N2	26	11	62	5		0	0.150685	15.0685				17	17	84.9315	82.9787	85.8824	84.7059	90.1235	94.0594	85.9375	91.2621	82.3529	93.5484		95.6835	90	99.2308	88.1944	94.2308	95.3488	90.4762	99.1379	96
N2	30	2	71	9		0	0.0273973	2.73973				19	19	78.0822	76.5957	74.1176	67.0588	86.4198	91.0891	79.6875	86.4078	65.6863	91.3978		94.964	60.8333	98.4615	78.4722	82.6923	88.3721	78.2313	92.2414	77
N2	32	2	71	0	0	0	0.0273973	2.73973				21	21	58.9041	53.1915	58.8235	40	71.6049	83.1683	70.3125	68.932	46.0784	78.4946		94.964	51.6667	97.6923	74.3056	79.4872	84.8837	72.1088	87.931	59
N2	34	0	73	2	0	0	0	0				24	24	21.9178	29.7872	36.4706	21.1765	51.8519	51.4851	40.625	48.5437	25.4902	59.1398		94.964	40	96	66.6667	74	81.3953	65.9864	84.4828	47
N2	37	0	73		0	0	0	0				26	26	15.0685	19.1489	15.2941	8.23529	33.3333	32.6733	26.5625	32.0388	9.80392	46.2366		92.8058	30.8333	91	60.4167	68	76.7442	55.102	76.7241	36
N2	39	0	73		0	0	0	0				28	28	2.73973	2.12766	7.05882	2.35294	17.284	20.7921	3.125	15.534	2.94118	26.8817		84.1727	10	84	42.3611	46	51.1628	22.449	67.2414	9
N2	41	0	73		0	0	0	0				31	31	2.73973	0	2.35294	0	7.40741	12.8713	0	5.82524	0	12.9032		72.6619	5	70	29	38	35	15	55	4
N2	44	0	73		0	0	0	0				33	33	0		0		0	6.93069		2.91262		4.30108		56.8345	2	52	19	26	22	8	40	2
N2	46	0	73		0	0	0	0				35	35						2.9703		0.970874		2.15054		36.6906	0	29	8	12	8	2	20	0
												38	38						0		0		0		20.8633	0	16	6	4	0	0	11	0
C9	0	81	0	0	0	0	1	100				40	40
C9	5	81	0	0	0	0	1	100				42	42
C9	7	81	0	0	0	0	1	100				45	45
C9	10	81	0	0	0	0	1	100
C9	12	80	1	1		0	0.987654	98.7654
C9	14	76	5	4		0	0.938272	93.8272
C9	17	73	8	3		0	0.901235	90.1235
C9	19	70	11	3		0	0.864198	86.4198
C9	21	58	23	12		0	0.716049	71.6049
C9	24	42	39	16		0	0.518519	51.8519
C9	26	27	54	15		0	0.333333	33.3333
C9	28	14	67	13		0	0.17284	17.284
C9	32	6	75	8		0	0.0740741	7.40741
C9	34	0	81	6		0	0	0
C9	37	0	81			0	0	0
C9	39	0	81			0	0	0
C9	41	0	81			0	0	0
C9	44	0	81			0	0	0
C9	46	0	81			0	0	0
2KO	0	85	0	0	0	0	1	100
2KO	5	85	0	0	0	0	1	100
2KO	7	85	0	0	0	0	1	100
2KO	11	85	0	0	0	0	1	100
2KO	13	83	2	2		0	0.976471	97.6471
2KO	16	80	5	3		0	0.941176	94.1176
2KO	18	73	12	7		0	0.858824	85.8824
2KO	20	63	22	10		0	0.741176	74.1176
2KO	23	50	35	13		0	0.588235	58.8235
2KO	25	31	54	19		0	0.364706	36.4706
2KO	27	13	72	18		0	0.152941	15.2941
2KO	30	6	79	7		0	0.0705882	7.05882
2KO	32	2	83	4		0	0.0235294	2.35294
2KO	34	0	85	2	0	0	0	0
2KO	37	0	85		0	0	0	0
2KO	39	0	85		0	0	0	0
2KO	41	0	85		0	0	0	0
2KO	44	0	85		0	0	0	0
2KO	46	0	85		0	0	0	0
1kO	0	47	0	0	0	0	1	100
1kO	5	47	0	0	0	0	1	100
1kO	7	47	0	0	0	0	1	100
1kO	11	47	0	0	0	0	1	100
1kO	13	46	1	1	0	0	0.978723	97.8723
1kO	16	43	4	3	0	0	0.914894	91.4894
1kO	18	39	8	4	0	0	0.829787	82.9787
1kO	20	36	11	3	0	0	0.765957	76.5957
1kO	23	25	22	11	0	0	0.531915	53.1915
1kO	25	14	33	11	0	0	0.297872	29.7872
1kO	27	9	38	5	0	0	0.191489	19.1489
1kO	30	1	46	8	0	0	0.0212766	2.12766
1kO	32	0	47	1	0	0	0	0
1kO	34	0	47		0	0	0	0
1kO	37	0	47		0	0	0	0
1kO	39	0	47		0	0	0	0
1kO	41	0	47		0	0	0	0
1kO	44	0	47		0	0	0	0
1kO	46	0	47		0	0	0	0
4KO	0	85	0	0	0	0	1	100
4KO	5	85	0	0	0	0	1	100
4KO	7	85	0	0	0	0	1	100
4KO	11	85	0	0	0	0	1	100
4KO	13	83	2	2	0	0	0.976471	97.6471
4KO	16	79	6	4	0	0	0.929412	92.9412
4KO	18	72	13	7	0	0	0.847059	84.7059
4KO	20	57	28	15		0	0.670588	67.0588
4KO	23	34	51	23	0	0	0.4	40
4KO	25	18	67	16	0	0	0.211765	21.1765
4KO	27	7	78	11	0	0	0.0823529	8.23529
4KO	30	2	83	5	0	0	0.0235294	2.35294
4KO	32	0	85	2	0	0	0	0
4KO	34	0	85		0	0	0	0
4KO	37	0	85		0	0	0	0
4KO	39	0	85		0	0	0	0
4KO	41	0	85	0	0	0	0	0
4KO	44	0	85	0	0	0	0	0
4KO	46	0	85	0	0	0	0	0
2O;4O	0	103	0	0	0	0	1	100
2O;4O	5	103	0	0	0	0	1	100
2O;4O	7	103	0	0	0	0	1	100
2O;4O	11	103	0	0	0	0	1	100
2O;4O	13	100	3	3	0	0	0.970874	97.0874
2O;4O	16	99	4	1		0	0.961165	96.1165
2O;4O	18	94	9	5	0	0	0.912621	91.2621
2O;4O	20	89	14	5		0	0.864078	86.4078
2O;4O	23	71	32	18	0	0	0.68932	68.932
2O;4O	25	50	53	21	0	0	0.485437	48.5437
2O;4O	27	33	70	17	0	0	0.320388	32.0388
2O;4O	30	16	87	17	0	0	0.15534	15.534
2O;4O	32	6	97	10	0	0	0.0582524	5.82524
2O;4O	34	3	100	3	0	0	0.0291262	2.91262
2O;4O	37	1	102	2	0	0	0.00970874	0.970874
2O;4O	39	1	102	0	0	0	0.00970874	0.970874
2O;4O	41	0	103	1	0	0	0	0
2O;4O	44	0	103		0	0	0	0
2O;4O	46	0	103		0	0	0	0
2o;4KO	0	102	0	0	0	0	1	100
2o;4KO	5	102	0	0	0	0	1	100
2o;4KO	7	102	0	0	0	0	1	100
2o;4KO	11	102	0	0	0	0	1	100
2o;4KO	13	98	4	4		0	0.960784	96.0784
2o;4KO	16	94	8	4		0	0.921569	92.1569
2o;4KO	18	84	18	10		0	0.823529	82.3529
2o;4KO	20	67	35	17	0	0	0.656863	65.6863
2o;4KO	23	47	55	20	0	0	0.460784	46.0784
2o;4KO	25	26	76	21	0	0	0.254902	25.4902
2o;4KO	27	10	92	16	0	0	0.0980392	9.80392
2o;4KO	30	3	99	7	0	0	0.0294118	2.94118
2o;4KO	32	0	102	3	0	0	0	0
2o;4KO	34	0	102		0	0	0	0
2o;4KO	37	0	102		0	0	0	0
2o;4KO	39	0	102		0	0	0	0
2o;4KO	41	0	102		0	0	0	0
2o;4KO	44	0	102		0	0	0	0
2o;4KO	46	0	102		0	0	0	0
2O;1KO	0	64	0	0	0	0	1	100
2O;1KO	5	64	0	0	0	0	1	100
2O;1KO	7	64	0	0	0	0	1	100
2O;1KO	11	64	0	0	0	0	1	100
2O;1KO	13	63	1	1		0	0.984375	98.4375
2O;1KO	16	61	3	2		0	0.953125	95.3125
2O;1KO	18	55	9	6	0	0	0.859375	85.9375
2O;1KO	20	51	13	4	0	0	0.796875	79.6875
2O;1KO	23	45	19	6	0	0	0.703125	70.3125
2O;1KO	25	26	38	19	0	0	0.40625	40.625
2O;1KO	27	17	47	9	0	0	0.265625	26.5625
2O;1KO	30	2	62	15	0	0	0.03125	3.125
2O;1KO	32	0	64	2	0	0	0	0
2O;1KO	34	0	64		0	0	0	0
2O;1KO	37	0	64		0	0	0	0
2O;1KO	39	0	64	0	0	0	0	0
2O;1KO	41	0	64	0	0	0	0	0
2O;1KO	44	0	64	0	0	0	0	0
	46
2O;4O;1KO	0	93	0	0	0	0	1	100
2O;4O;1KO	5	93	0	0	0	0	1	100
2O;4O;1KO	7	93	0	0	0	0	1	100
2O;4O;1KO	11	93	0	0	0	0	1	100
2O;4O;1KO	13	92	1	1		0	0.989247	98.9247
2O;4O;1KO	16	89	4	3		0	0.956989	95.6989
2O;4O;1KO	18	87	6	2		0	0.935484	93.5484
2O;4O;1KO	20	85	8	2		0	0.913978	91.3978
2O;4O;1KO	23	73	20	12		0	0.784946	78.4946
2O;4O;1KO	25	55	38	18		0	0.591398	59.1398
2O;4O;1KO	27	43	50	12		0	0.462366	46.2366
2O;4O;1KO	30	25	68	18	0	0	0.268817	26.8817
2O;4O;1KO	32	12	81	13	0	0	0.129032	12.9032
2O;4O;1KO	34	4	89	8	0	0	0.0430108	4.30108
2O;4O;1KO	37	2	91	2	0	0	0.0215054	2.15054
2O;4O;1KO	39	0	93	2	0	0	0	0
2O;4O;1KO	41	0	93		0	0	0	0
2O;4O;1KO	44	0	93		0	0	0	0
2O;4O;1KO	46	0	93		0		0	0
2O;4O;1KO	47	0	93		0		0	0
4OE	0	101	0	0	0	0	1	100
4OE	5	101	0	0	0	0	1	100
4OE	7	101	0	0	0	0	1	100
4OE	10	101	0	0	0	0	1	100
4OE	12	100	1	1	0	0	0.990099	99.0099
4OE	14	98	3	2	0	0	0.970297	97.0297
4OE	17	95	6	3	0	0	0.940594	94.0594
4OE	19	92	9	3		0	0.910891	91.0891
4OE	21	84	17	8		0	0.831683	83.1683
4OE	24	52	49	32		0	0.514851	51.4851
4OE	26	33	68	19		0	0.326733	32.6733
4OE	29	21	80	12		0	0.207921	20.7921
4OE	31	13	88	8		0	0.128713	12.8713
4OE	33	7	94	6		0	0.0693069	6.93069
4OE	35	3	98	4		0	0.029703	2.9703
4OE	38	0	101	3		0	0	0
4OE	40	0	101			0	0	0
4OE		0	101	0	0	0	0	0
11L	0	176	0	0	0	0	1	100
11	5	176	0	0	0	0	1	100
11	7	176	0	0	0	0	1	100
11	10	176	0	0	0	0	1	100
11	12	175	1	1	0	0	0.994318	99.4318
11	14	175	1	0	0	0	0.994318	99.4318
11	17	174	2	1	0	0	0.988636	98.8636
11	19	170	6	0	4	0	0.965909	96.5909
11	21	159	17	9	2	0	0.903409	90.3409
11	24	140	36	18	1	0	0.795455	79.5455
11	26	121	55	18	1	0	0.6875	68.75
11	29	36	140	82	3	0	0.204545	20.4545
11	31	8	168	28	0	0	0.0454545	4.54545
11	33	0	176	8	0	0	0	0
11	35	0	176	0	0	0	0	0
11	38	0	176	0	0	0	0	0
11	40	0	176	0	0	0	0	0
11		0	176	0	0	0	0	0
12L	0	125	0	0	0	0	1	100
12	5	125	0	0	0	0	1	100
12	7	125	0	0	0	0	1	100
12	10	125	0	0	0	0	1	100
12	12	119	6	6	0	0	0.952	95.2
12	14	119	6	0	0	0	0.952	95.2
12	17	118	7	1	0	0	0.944	94.4
12	19	116	9	0	2	0	0.928	92.8
12	21	111	14	2	3	0	0.888	88.8
12	24	94	31	11	6	0	0.752	75.2
12	26	81	44	11	2	0	0.648	64.8
12	29	38	87	42	1	0	0.304	30.4
12	31	16	109	22	0	0	0.128	12.8
12	33	4	121	12	0	0	0.0625	6.25
12	35	0	125	4	0	0	0	0
12	38	0	125	0	0	0	0	0
12	40	0	125	0	0	0	0	0
12		0	125	0	0	0	0	0
13	0	119	0	0	0	0	1	100
13	5	119	0	0	0	0	1	100
13	7	119	0	0	0	0	1	100
13	10	119	0	0	0	0	1	100
13	12	116	3	3	0	0	0.97479	97.479
13	14	116	3	0	0	0	0.97479	97.479
13	17	116	3	0	0	0	0.97479	97.479
13	19	112	7	2	2	0	0.941176	94.1176
13	21	97	22	5	10	0	0.815126	81.5126
13	24	65	54	9	23	0	0.546218	54.6218
13	26	52	67	11	2	0	0.436975	43.6975
13	29	31	88	19	2	0	0.260504	26.0504
13	31	26	93	5	0	0	0.218487	21.8487
13	33	12	107	14	0	0	0.10084	10.084
13	35	11	108	1	0	0	0.092437	9.2437
13	38	4	115	7	0	0	0.0336134	3.36134
13	40	2	117	2	0	0	0.0168067	1.68067
13	42	2	117	0	0	0	0.0168067	1.68067
13	45	0	119	2	0		0	0
14L	0	98	0	0	0	0	1	100
14	5	98	0	0	0	0	1	100
14	7	98	0	0	0	0	1	100
14	10	98	0	0	0	0	1	100
14	12	97	1	1	0	0	0.989796	98.9796
14	14	97	1	0	0	0	0.989796	98.9796
14	17	97	1	0	0	0	0.989796	98.9796
14	19	96	2	1	0	0	0.979592	97.9592
14	21	92	6	2	2	0	0.938776	93.8776
14	24	78	20	12	2	0	0.795918	79.5918
14	26	66	32	11	1	0	0.673469	67.3469
14	29	15	83	50	1	0	0.153061	15.3061
14	31	5	93	10	0	0	0.0510204	5.10204
14	33	0	98	5	0	0	0	0
14	35	0	98	0	0	0	0	0
14	38	0	98	0	0	0	0	0
14	40	0	98	0	0	0	0	0
14		0	98	0	0	0	0	0
15L	0	156	0	0	0	0	1	100
15	5	156	0	0	0	0	1	100
15	7	156	0	0	0	0	1	100
15	10	156	0	0	0	0	1	100
15	12	153	3	3	0	0	0.980769	98.0769
15	14	153	3	0	0	0	0.980769	98.0769
15	17	151	5	2	0	0	0.967949	96.7949
15	19	151	5	0	0	0	0.967949	96.7949
15	21	143	13	4	4	0	0.916667	91.6667
15	24	120	36	18	5	0	0.769231	76.9231
15	26	99	57	18	3	0	0.634615	63.4615
15	29	18	138	81	0	0	0.115385	11.5385
15	31	4	152	14	0	0	0.025641	2.5641
15	33	0	156	4	0	0	0	0
15	35	0	156	0	0	0	0	0
15	38	0	156	0	0	0	0	0
15	40	0	156	0	0	0	0	0
15		0	156	0	0	0	0	0
16	0	156	0	0	0	0	1	100
16	5	156	0	0	0	0	1	100
16	7	156	0	0	0	0	1	100
16	10	156	0	0	0	0	1	100
16	12	154	2	2	0	0	0.987179	98.7179
16	14	154	2	0	0	0	0.987179	98.7179
16	17	154	2	0	0	0	0.987179	98.7179
16	19	148	8	4	2	0	0.948718	94.8718
16	21	136	20	4	8	0	0.871795	87.1795
16	24	98	58	10	28	0	0.628205	62.8205
16	26	79	77	11	8	0	0.50641	50.641
16	29	27	129	52	0	0	0.173077	17.3077
16	31	18	138	9	0	0	0.115385	11.5385
16	33	7	149	11	0	0	0.0448718	4.48718
16	35	2	154	5	0	0	0.0128205	1.28205
16	38	1	155	1	0	0	0.00641026	0.641026
16	40	1	155	0	0	0	0.00641026	0.641026
16	42	0	156	1	0	0	0	0
17	0	134	0	0	0	0	1	100
17	5	134	0	0	0	0	1	100
17	7	134	0	0	0	0	1	100
17	10	134	0	0	0	0	1	100
17	12	132	2	2	0	0	0.985075	98.5075
17	14	132	2	0	0	0	0.985075	98.5075
17	17	132	2	0	0	0	0.985075	98.5075
17	19	124	10	4	4	0	0.925373	92.5373
17	21	109	25	5	10	0	0.813433	81.3433
17	24	90	44	10	9	0	0.671642	67.1642
17	26	70	64	15	5	0	0.522388	52.2388
17	29	34	100	36	0	0	0.253731	25.3731
17	31	23	111	11	0	0	0.171642	17.1642
17	33	3	131	20	0	0	0.0223881	2.23881
17	35	1	133	2	0	0	0.00746269	0.746269
17	38	1	133	0	0	0	0.00746269	0.746269
17	40	0	134	1	0	0	0	0
17		0	134	0	0	0	0	0
18	0	233	0	0	0	0	1	100
18	5	233	0	0	0	0	1	100
18	7	233	0	0	0	0	1	100
18	10	233	0	0	0	0	1	100
18	12	233	0	0	0	0	1	100
18	14	232	1	1	0	0	0.995708	99.5708
18	17	221	12	10	1	0	0.948498	94.8498
18	19	219	14	1	1	0	0.939914	93.9914
18	21	212	21	3	4	0	0.909871	90.9871
18	24	180	53	24	8	0	0.772532	77.2532
18	26	136	97	39	5	0	0.583691	58.3691
18	29	72	161	62	2	0	0.309013	30.9013
18	31	59	174	13	0	0	0.253219	25.3219
18	33	36	197	23	0	0	0.154506	15.4506
18	35	27	206	9	0	0	0.11588	11.588
18	38	15	218	12	0	0	0.0643777	6.43777
18	40	7	226	8	0	0	0.0300429	3.00429
18	42	7	226	0	0	0	0.0300429	3.00429
18	45	0	233	7	0	0	0	0
19	0	142	0	0	0	0	1	100
19	5	142	0	0	0	0	1	100
19	7	142	0	0	0	0	1	100
19	10	142	0	0	0	0	1	100
19	12	140	2	2	0	0	0.985915	98.5915
19	14	137	5	2	1	0	0.964789	96.4789
19	17	128	14	7	2	0	0.901408	90.1408
19	19	121	21	0	7	0	0.852113	85.2113
19	21	115	27	3	3	0	0.809859	80.9859
19	24	81	61	21	13	0	0.570423	57.0423
19	26	48	94	26	7	0	0.338028	33.8028
19	29	21	121	27	0	0	0.147887	14.7887
19	31	11	131	10	0	0	0.0774648	7.74648
19	33	2	140	9	0	0	0.0140845	1.40845
19	35	1	141	1	0	0	0.00704225	0.704225
19	38	0	142	1	0	0	0	0
19	40	0	142	0	0	0	0	0
19		0	142	0	0	0	0	0
20	0	227	0	0	0	0	1	100
20	5	227	0	0	0	0	1	100
20	7	227	0	0	0	0	1	100
20	10	227	0	0	0	0	1	100
20	12	224	3	3	0	0	0.986784	98.6784
20	14	224	3	0	0	0	0.986784	98.6784
20	17	214	13	8	2	0	0.942731	94.2731
20	19	202	25	5	7	0	0.889868	88.9868
20	21	180	47	10	12	0	0.792952	79.2952
20	24	116	111	31	33	0	0.511013	51.1013
20	26	86	141	26	4	0	0.378855	37.8855
20	29	21	206	59	6	0	0.092511	9.2511
20	31	7	220	14	0	0	0.030837	3.0837
20	33	1	226	6	0	0	0.00440529	0.440529
20	35	0	227	1	0	0	0	0
20	38	0	227	0	0	0	0	0
20	40	0	227	0	0	0	0	0
20		0	227	0	0	0	0	0
21	0	154	0	0	0	0	1	100
21	5	154	0	0	0	0	1	100
21	7	154	0	0	0	0	1	100
21	10	154	0	0	0	0	1	100
21	12	154	0	0	0	0	1	100
21	14	154	0	0	0	0	1	100
21	17	154	0	0	0	0	1	100
21	19	146	8	7	1	0	0.948052	94.8052
21	21	127	27	4	15	0	0.824675	82.4675
21	24	106	48	17	4	0	0.688312	68.8312
21	26	68	86	31	7	0	0.441558	44.1558
21	29	38	116	29	1	0	0.246753	24.6753
21	31	29	125	9	0	0	0.188312	18.8312
21	33	11	143	18	0	0	0.0714286	7.14286
21	35	5	149	6	0	0	0.0324675	3.24675
21	38	0	154	5	0	0	0	0
21	40	0	154	0	0	0	0	0
21		0	154	0	0	0	0	0

## Sheet: stats
% WT [73]					condition	chi	pvalue	corrected_pvalue
#days	dead	censored			WT v.s. fmo-4 OE	20.34	6.5e-06	3.2e-05
0	0				WT v.s. fmo-2OE	10.5	0.0012	0.006
5	0				WT v.s. 2O4O	10.17	0.0014	0.0071
7	0				WT v.s. fmo-4 KO	3.35	0.0672	0.336
10	0				WT v.s. 2O4K	1.67	0.1957	0.9783
12	0				fmo-4 OE v.s. WT	20.34	6.5e-06	3.2e-05
14	5				fmo-4 OE v.s. fmo-2OE	1.85	0.1738	0.8691
17	6				fmo-4 OE v.s. 2O4O	1.92	0.1653	0.8267
19	5				fmo-4 OE v.s. fmo-4 KO	38.82	0	0
21	14				fmo-4 OE v.s. 2O4K	35.06	3.2e-09	1.6e-08
24	27				fmo-2OE v.s. WT	10.5	0.0012	0.006
26	5				fmo-2OE v.s. fmo-4 OE	1.85	0.1738	0.8691
28	9				fmo-2OE v.s. 2O4O	0.02	0.8831	1
31	0				fmo-2OE v.s. fmo-4 KO	24.91	6e-07	3e-06
33	2				fmo-2OE v.s. 2O4K	22.34	2.3e-06	1.1e-05
35					2O4O v.s. WT	10.17	0.0014	0.0071
38					2O4O v.s. fmo-4 OE	1.92	0.1653	0.8267
40					2O4O v.s. fmo-2OE	0.02	0.8831	1
42					2O4O v.s. fmo-4 KO	24.78	6.4e-07	3.2e-06
45					2O4O v.s. 2O4K	22.01	2.7e-06	1.4e-05
					fmo-4 KO v.s. WT	3.35	0.0672	0.336
% fmo-4 OE [101]					fmo-4 KO v.s. fmo-4 OE	38.82	0	0
#days	dead	censored			fmo-4 KO v.s. fmo-2OE	24.91	6e-07	3e-06
0	0				fmo-4 KO v.s. 2O4O	24.78	6.4e-07	3.2e-06
5	0				fmo-4 KO v.s. 2O4K	0.27	0.6048	1
7	0				2O4K v.s. WT	1.67	0.1957	0.9783
10	0				2O4K v.s. fmo-4 OE	35.06	3.2e-09	1.6e-08
12	1				2O4K v.s. fmo-2OE	22.34	2.3e-06	1.1e-05
14	2				2O4K v.s. 2O4O	22.01	2.7e-06	1.4e-05
17	3				2O4K v.s. fmo-4 KO	0.27	0.6048	1
19	3
21	8
24	32
26	19
28	12
31	8
33	6
35	4
38	3
40
42
45
% fmo-2OE [81]
#days	dead	censored
0	0
5	0
7	0
10	0
12	1
14	4
17	3
19	3
21	12
24	16
26	15
28	13
31	8
33	6
35
38
40
42
45
% 2O4O [103]
#days	dead	censored
0	0
5	0
7	0
10	0
12	3
14	1
17	5
19	5
21	18
24	21
26	17
28	17
31	10
33	3
35	2
38	0
40	1
42
45
% fmo-4 KO [85]
#days	dead	censored
0	0
5	0
7	0
10	0
12	2
14	4
17	7
19	15
21	23
24	16
26	11
28	5
31	2
33
35
38
40
42
45
% 2O4K [102]
#days	dead	censored
0	0
5	0
7	0
10	0
12	4
14	4
17	10
19	17
21	20
24	21
26	16
28	7
31	3
33
35
38
40
42
45

## Sheet: Sheet1
#1	N2								#1	N2					#1	N2
#2	Lei42	fmo-2p::MC; unc-119p::HIF-1(P621A); JT307 #1							#2	Lei42	fmo-2p::MC; unc-119p::HIF-1(P621A); JT307 #1				#11L	Lei51	fmo-2p::MC; JT307; gcy-31; gcy-36 - XA2262 sibling #1
#3	Lei43	fmo-2p::MC; unc-119p::HIF-1(P621A); JT307 #2							#3	Lei43	fmo-2p::MC; unc-119p::HIF-1(P621A); JT307 #2				#12L	Lei52	fmo-2p::MC; JT307; gcy-33; gcy-36 - XA2262 sibling #1
#4	Lei44	fmo-2p::MC; TU3311; CB5602 #1							#4	Lei44	fmo-2p::MC; TU3311; CB5602 #1				#13	Lei53	fmo-2p::MC; JT307; gcy-33; gcy-36 - XA2262 sibling #2
#5	Lei45	fmo-2p::MC; TU3311 #1							#5	Lei45	fmo-2p::MC; TU3311 #1				#14L	Lei55	fmo-2p::MC; JT307 - XA2262 sibling #1
#6	Lei46	fmo-2p::MC; CB5602 #1							#6	Lei46	fmo-2p::MC; CB5602 #1				#15L	Lei56	fmo-2p::MC; JT307 - XA2262 sibling #2
#7	Lei47	fmo-2p::MC; TU3311; CB5602 #2							#7	Lei47	fmo-2p::MC; TU3311; CB5602 #2				#16	Lei57	fmo-2p::MC - XA2262 sibling #1
#8L	Lei48	fmo-2p::MC; JT307; XA2262 #1													#17	Lei58	fmo-2p::MC - XA2262 sibling #2
#9	Lei49	fmo-2p::MC; JT307; XA2262 #2													#18	Lei59	fmo-2p::MC; gcy-33; gcy-36 - XA2262 sibling #1
#10L	Lei50	fmo-2p::MC; JT307; XA2262 #3							#1	N2					#19	Lei60	fmo-2p::MC; gcy-33; gcy-36 - XA2262 sibling #2
#11L	Lei51	fmo-2p::MC; JT307; gcy-31; gcy-36 - XA2262 sibling #1							#8L	Lei48	fmo-2p::MC; JT307; XA2262 #1
#12L	Lei52	fmo-2p::MC; JT307; gcy-33; gcy-36 - XA2262 sibling #1							#9	Lei49	fmo-2p::MC; JT307; XA2262 #2
#13	Lei53	fmo-2p::MC; JT307; gcy-33; gcy-36 - XA2262 sibling #2							#10L	Lei50	fmo-2p::MC; JT307; XA2262 #3
#14L	Lei55	fmo-2p::MC; JT307 - XA2262 sibling #1							#14L	Lei55	fmo-2p::MC; JT307 - XA2262 sibling #1
#15L	Lei56	fmo-2p::MC; JT307 - XA2262 sibling #2							#15L	Lei56	fmo-2p::MC; JT307 - XA2262 sibling #2
#16	Lei57	fmo-2p::MC - XA2262 sibling #1							#16	Lei57	fmo-2p::MC - XA2262 sibling #1
#17	Lei58	fmo-2p::MC - XA2262 sibling #2							#17	Lei58	fmo-2p::MC - XA2262 sibling #2
#18	Lei59	fmo-2p::MC; gcy-33; gcy-36 - XA2262 sibling #1							#20	Lei61	fmo-2p::MC; XA2262 #1
#19	Lei60	fmo-2p::MC; gcy-33; gcy-36 - XA2262 sibling #2							#21	Lei62	fmo-2p::MC; XA2262 #2
#20	Lei61	fmo-2p::MC; XA2262 #1
#21	Lei62	fmo-2p::MC; XA2262 #2
