# Supplementary material for: fmo-4 promotes longevity and stress resistance via ER to mitochondria calcium regulation in C. elegans
Source: eLife journal article supplement (doi:10.7554/elife.99971), 2024-08-27
Supplement: fig2-data2 [file 02.28.2022 fmo4 stress resistance assay 4oe 2o4o 2o4k.xlsx]

## Sheet: N2
strain	day	alive	dead-total	dead-normal	dead-ruptured	censored	ratio-alive	percentage-alive
N2	0	41	0			0	1	100
N2	3	38	3	3		0	0.926829	92.6829
N2	4	29	12	9		0	0.707317	70.7317						1	2	3	4	5	6	7	8	9	10	11	12							#19	#20	#21
N2	5	12	29	17		0	0.292683	29.2683			plot data here-->		day	Wild-Type	fmo-2 OE	FMO-4 OE	FMO-4 KO	fmo-2O;4O	fmo-2O;4K													Lei60	Lei61	Lei62
N2	6	0	41	12		0	0	0				0	0	100	100	100	100	100	100
N2	7	0	41			0	0	0				3	3	92.6829	98.3871	96.5517	95.9459	98.5915	96.875
N2	8	0	41			0	0	0				4	4	70.7317	91.9355	91.3793	81.0811	94.3662	86.4583
N2	9	0	41			0	0	0				5	5	29.2683	69.3548	55.1724	13.5135	73.2394	35.4167
N2	10	0	41			0	0	0				6	6	0	37.0968	12.069	0	47.8873	0
N2	11	0	41			0	0	0				7	7		4.83871	0		14.0845
N2	12	0	41			0	0	0				8	8		1.6129			9.85915
N2	13	0	41			0	0	0				9	9		0			2.8169
N2	14	0	41			0	0	0				10	10					0
N2	15	0	41			0	0	0				11	11
N2	16	0	41			0	0	0				12	12
N2	17	0	41			0	0	0
N2	18	0	41			0	0	0
N2	19	0	41			0	0	0
N2	20	0	41			0	0	0
C9	0	62	0			0	1	100
C9	3	61	1	1		0	0.983871	98.3871
C9	4	57	5	4		0	0.919355	91.9355
C9	5	43	19	14		0	0.693548	69.3548
C9	6	23	39	20		0	0.370968	37.0968
C9	7	3	59	20		0	0.0483871	4.83871
C9	8	1	61	2		0	0.016129	1.6129
C9	9	0	62	1		0	0	0
C9	10	0	62			0	0	0
C9	11	0	62			0	0	0
C9	12	0	62			0	0	0
C9	13	0	62			0	0	0
C9	14	0	62			0	0	0
C9	15	0	62			0	0	0
C9	16	0	62			0	0	0
C9	17	0	62			0	0	0
C9	18	0	62			0	0	0
C9	19	0	62			0	0	0
C9	20	0	62			0	0	0
4OE	0	58	0			0	1	100
4OE	3	56	2	2		0	0.965517	96.5517
4OE	4	53	5	3		0	0.913793	91.3793
4OE	5	32	26	21		0	0.551724	55.1724
4OE	6	7	51	25		0	0.12069	12.069
4OE	7	0	58	7		0	0	0
4OE	8	0	58			0	0	0
4OE	9	0	58			0	0	0
4OE	10	0	58			0	0	0
4OE	11	0	58			0	0	0
4OE	12	0	58			0	0	0
4OE	13	0	58			0	0	0
4OE	14	0	58			0	0	0
4OE	15	0	58			0	#DIV/0!	#DIV/0!
4OE	16	0	58			0	#DIV/0!	#DIV/0!
4OE	17	0	58			0	#DIV/0!	#DIV/0!
4OE	18	0	58			0	#DIV/0!	#DIV/0!
4OE	19	0	58			0	#DIV/0!	#DIV/0!
4OE	20	0	58			0	#DIV/0!	#DIV/0!
4KO	0	74	0			0	1	100
4KO	3	71	3	3		0	0.959459	95.9459
4KO	4	60	14	11		0	0.810811	81.0811
4KO	5	10	64	50		0	0.135135	13.5135
4KO	6	0	74	10		0	0	0
4KO	7	0	74				0	0
4KO	8	0	74			0	0	0
4KO	9	0	74			0	0	0
4KO	10	0	74			0	0	0
4KO	11	0	74			0	0	0
4KO	12	0	74			0	0	0
4KO	13	0	74			0	0	0
4KO	14	0	74			0	0	0
4KO	15	0	74			0	0	0
4KO	16	0	74			0	0	0
4KO	17	0	74			0	0	0
4KO	18	0	74			0	0	0
4KO	19	0	74			0	0	0
4KO	20	0	74			0	0	0
2O;4K	0	96	0			0	1	100
2O;4K	3	93	3	3		0	0.96875	96.875
2O;4K	4	83	13	10		0	0.864583	86.4583
2O;4K	5	34	62	49		0	0.354167	35.4167
2O;4K	6	0	96	34		0	0	0
2O;4K	7	0	96			0	0	0
2O;4K	8	0	96			0	0	0
2O;4K	9	0	96			0	0	0
2O;4K	10	0	96			0	0	0
2O;4K	11	0	96			0	0	0
2O;4K	12	0	96			0	0	0
2O;4K	13	0	96			0	0	0
2O;4K	14	0	96			0	0	0
2O;4K	15	0	96			0	0	0
2O;4K	16	0	96			0	0	0
2O;4K	17	0	96			0	0	0
2O;4K	18	0	96			0	0	0
2O;4K	19	0	96			0	0	0
2O;4K	20	0	96			0	0	0
2O;4O	0	71	0			0	1	100
2O;4O	3	70	1	1		0	0.985915	98.5915
2O;4O	4	67	4	3		0	0.943662	94.3662
2O;4O	5	52	19	15		0	0.732394	73.2394
2O;4O	6	34	37	18		0	0.478873	47.8873
2O;4O	7	10	61	24		0	0.140845	14.0845
2O;4O	8	7	64	3		0	0.0985915	9.85915
2O;4O	9	2	69	5		0	0.028169	2.8169
2O;4O	10	0	71	2		0	0	0
2O;4O	11	0	71			0	0	0
2O;4O	12	0	71			0	0	0
2O;4O	13	0	71			0	0	0
2O;4O	14	0	71			0	0	0
2O;4O	15	0	71			0	0	0
2O;4O		0	71			0	0	0
2O;4O	17	0	71			0	0	0
2O;4O	18	0	71			0	0	0
2O;4O	19	0	71			0	0	0
2O;4O	20	0	71			0	0	0
7	0	86	0			0	1	100
7	5	86	0			0	1	100
7	7	86	0			0	1	100
7	10	86	0			0	1	100
7	13	86	0			0	1	100
7	16	86	0			0	1	100
7	17	86	0			0	1	100
7	20	86	0			0	1	100
7	22	86	0			0	1	100
7	24	86	0			0	1	100
7	27	86	0			0	1	100
7	29	86	0			0	1	100
7	31	86	0			0	1	100
7	34	86	0			0	1	100
7	36	86	0			0	1	100
7	38	86	0			0	1	100
7	41	86	0			0	1	100
7	44	86	0			0	1	100
7	46	86	0			0	1	100
8	0	103	0			0	1	100
8	5	103	0			0	1	100
8	7	103	0			0	1	100
8	10	103	0			0	1	100
8	13	103	0			0	1	100
8	16	103	0			0	1	100
8	17	103	0			0	1	100
8	20	103	0			0	1	100
8	22	103	0			0	1	100
8	24	103	0			0	1	100
8	27	103	0			0	1	100
8	29	103	0			0	1	100
8	31	103	0			0	1	100
8	34	103	0			0	1	100
8	36	103	0			0	1	100
8	38	103	0			0	1	100
8	41	103	0			0	1	100
8	44	103	0			0	1	100
	46
9	0	96	0			0	1	100
9	5	96	0			0	1	100
9	7	96	0			0	1	100
9	10	96	0			0	1	100
9	13	96	0			0	1	100
9	16	96	0			0	1	100
9	17	96	0			0	1	100
9	20	96	0			0	1	100
9	22	96	0			0	1	100
9	24	96	0			0	1	100
9	27	96	0			0	1	100
9	29	96	0			0	1	100
9	31	96	0			0	1	100
9	34	96	0			0	1	100
9	36	96	0			0	1	100
9	38	96	0			0	1	100
9	41	96	0			0	1	100
9	44	96	0			0	1	100
9	46	96	0				1	100
9	47	96	0				1	100
10L	0	78	0			0	1	100
10	5	78	0			0	1	100
10	7	78	0			0	1	100
10	10	78	0			0	1	100
10	13	78	0			0	1	100
10	16	78	0			0	1	100
10	17	78	0			0	1	100
10	20	78	0			0	1	100
10	22	78	0			0	1	100
10	24	78	0			0	1	100
10	27	78	0			0	1	100
10	29	78	0			0	1	100
10	31	78	0			0	1	100
10	34	78	0			0	1	100
10	36	78	0		0	0	1	100
10	38	78	0		0	0	0.757282	75.7282
10	41	78	0		0	0	0.757282	75.7282
10	44	78	0		0	0	0.757282	75.7282
	46	78	0		0	0	0.757282	75.7282
	48	78	0		0	0	0.757282	75.7282
11L	0	104	0		0	0	1	100
11	5	104	0		0	0	1	100
11	7	104	0		0	0	1	100
11	11	104	0		0	0	1	100
11	13	103	1		1	0	0.990385	99.0385
11	16	103	1			0	0.990385	99.0385
11	18	102	2		1	0	0.980769	98.0769
11	20	101	3		1	0	0.971154	97.1154
11	23	101	3		0	0	0.971154	97.1154
11	25	101	3			0	0.971154	97.1154
11	27	101	3			0	0.971154	97.1154
11	30	101	3			0	0.971154	97.1154
11	32	101	3			0	0.971154	97.1154
11	34	101	3			0	0.971154	97.1154
11	37	101	3		0	0	0.971154	97.1154
11	39	101	3		0	0	0.971154	97.1154
11	41	101	3		0	0	0.971154	97.1154
11	44	101	3		0	0	0.971154	97.1154
	46
12L	0	62	0		0	0	1	100
12	5	62	0		0	0	1	100
12	7	62	0		0	0	1	100
12	11	62	0		0	0	1	100
12	13	62	0		0	0	1	100
12	16	62	0			0	1	100
12	18	62	0			0	1	100
12	20	62	0			0	1	100
12	23	62	0			0	1	100
12	25	62	0			0	1	100
12	27	62	0			0	1	100
12	30	62	0			0	1	100
12	32	62	0			0	1	100
12	34	62	0			0	1	100
12	37	62	0			0	1	100
12	39	62	0			0	1	100
12	41	62	0		0	0	1	100
12	44	62	0		0	0	1	100
	46
13	0	48	0	0	0	0	1	100
13	5	48	0	0	0	0	1	100
13	7	48	0	0	0	0	1	100
13	11	48	0	0	0	0	1	100
13	14	48	0	0	0	0	1	100
13	16	46	2	1	1	0	0.958333	95.8333
13	18	40	8	4	2	0	0.833333	83.3333
13	21	32	16	6	2	0	0.666667	66.6667
13	23	22	26	10	0	0	0.458333	45.8333
13	25	10	38	12		0	0.208333	20.8333
13	28	10	38			0	0.208333	20.8333
13	30	10	38			0	0.208333	20.8333
13	32	10	38			0	0.208333	20.8333
13	35	10	38			0	0.208333	20.8333
13	37	10	38			0	0.208333	20.8333
13	39	10	38			0	0.208333	20.8333
13	42	10	38			0	0.208333	20.8333
13	44	10	38			0	0.208333	20.8333
13	45	10	38				0.208333	20.8333
14L	0	51	0	0	0	0	1	100
14	5	51	0	0	0	0	1	100
14	7	51	0	0	0	0	1	100
14	11	51	0	0	0	0	1	100
14	14	50	1	0	1	0	0.980392	98.0392
14	16	49	2	1	0	0	0.960784	96.0784
14	18	42	9	7	0	0	0.823529	82.3529
14	21	27	24	13	2	0	0.529412	52.9412
14	23	17	34	10	0	0	0.333333	33.3333
14	25	12	39	5		0	0.235294	23.5294
14	28	12	39			0	0.235294	23.5294
14	30	12	39			0	0.235294	23.5294
14	32	12	39			0	0.235294	23.5294
14	35	12	39			0	0.235294	23.5294
14	37	12	39			0	0.235294	23.5294
14	39	12	39			0	0.235294	23.5294
14	42	12	39	0	0	0	0.235294	23.5294
14	44	12	39	0	0	0	0.235294	23.5294
15L	0	156	0	0	0	0	1	100
15	5	156	0	0	0	0	1	100
15	7	156	0	0	0	0	1	100
15	10	156	0	0	0	0	1	100
15	12	153	3	3	0	0	0.980769	98.0769
15	14	153	3	0	0	0	0.980769	98.0769
15	17	151	5	2	0	0	0.967949	96.7949
15	19	151	5	0	0	0	0.967949	96.7949
15	21	143	13	4	4	0	0.916667	91.6667
15	24	120	36	18	5	0	0.769231	76.9231
15	26	99	57	18	3	0	0.634615	63.4615
15	29	18	138	81	0	0	0.115385	11.5385
15	31	4	152	14	0	0	0.025641	2.5641
15	33	0	156	4	0	0	0	0
15	35	0	156	0	0	0	0	0
15	38	0	156	0	0	0	0	0
15	40	0	156	0	0	0	0	0
15		0	156	0	0	0	0	0
16	0	156	0	0	0	0	1	100
16	5	156	0	0	0	0	1	100
16	7	156	0	0	0	0	1	100
16	10	156	0	0	0	0	1	100
16	12	154	2	2	0	0	0.987179	98.7179
16	14	154	2	0	0	0	0.987179	98.7179
16	17	154	2	0	0	0	0.987179	98.7179
16	19	148	8	4	2	0	0.948718	94.8718
16	21	136	20	4	8	0	0.871795	87.1795
16	24	98	58	10	28	0	0.628205	62.8205
16	26	79	77	11	8	0	0.50641	50.641
16	29	27	129	52	0	0	0.173077	17.3077
16	31	18	138	9	0	0	0.115385	11.5385
16	33	7	149	11	0	0	0.0448718	4.48718
16	35	2	154	5	0	0	0.0128205	1.28205
16	38	1	155	1	0	0	0.00641026	0.641026
16	40	1	155	0	0	0	0.00641026	0.641026
16	42	0	156	1	0	0	0	0
17	0	134	0	0	0	0	1	100
17	5	134	0	0	0	0	1	100
17	7	134	0	0	0	0	1	100
17	10	134	0	0	0	0	1	100
17	12	132	2	2	0	0	0.985075	98.5075
17	14	132	2	0	0	0	0.985075	98.5075
17	17	132	2	0	0	0	0.985075	98.5075
17	19	124	10	4	4	0	0.925373	92.5373
17	21	109	25	5	10	0	0.813433	81.3433
17	24	90	44	10	9	0	0.671642	67.1642
17	26	70	64	15	5	0	0.522388	52.2388
17	29	34	100	36	0	0	0.253731	25.3731
17	31	23	111	11	0	0	0.171642	17.1642
17	33	3	131	20	0	0	0.0223881	2.23881
17	35	1	133	2	0	0	0.00746269	0.746269
17	38	1	133	0	0	0	0.00746269	0.746269
17	40	0	134	1	0	0	0	0
17		0	134	0	0	0	0	0
18	0	233	0	0	0	0	1	100
18	5	233	0	0	0	0	1	100
18	7	233	0	0	0	0	1	100
18	10	233	0	0	0	0	1	100
18	12	233	0	0	0	0	1	100
18	14	232	1	1	0	0	0.995708	99.5708
18	17	221	12	10	1	0	0.948498	94.8498
18	19	219	14	1	1	0	0.939914	93.9914
18	21	212	21	3	4	0	0.909871	90.9871
18	24	180	53	24	8	0	0.772532	77.2532
18	26	136	97	39	5	0	0.583691	58.3691
18	29	72	161	62	2	0	0.309013	30.9013
18	31	59	174	13	0	0	0.253219	25.3219
18	33	36	197	23	0	0	0.154506	15.4506
18	35	27	206	9	0	0	0.11588	11.588
18	38	15	218	12	0	0	0.0643777	6.43777
18	40	7	226	8	0	0	0.0300429	3.00429
18	42	7	226	0	0	0	0.0300429	3.00429
18	45	0	233	7	0	0	0	0
19	0	142	0	0	0	0	1	100
19	5	142	0	0	0	0	1	100
19	7	142	0	0	0	0	1	100
19	10	142	0	0	0	0	1	100
19	12	140	2	2	0	0	0.985915	98.5915
19	14	137	5	2	1	0	0.964789	96.4789
19	17	128	14	7	2	0	0.901408	90.1408
19	19	121	21	0	7	0	0.852113	85.2113
19	21	115	27	3	3	0	0.809859	80.9859
19	24	81	61	21	13	0	0.570423	57.0423
19	26	48	94	26	7	0	0.338028	33.8028
19	29	21	121	27	0	0	0.147887	14.7887
19	31	11	131	10	0	0	0.0774648	7.74648
19	33	2	140	9	0	0	0.0140845	1.40845
19	35	1	141	1	0	0	0.00704225	0.704225
19	38	0	142	1	0	0	0	0
19	40	0	142	0	0	0	0	0
19		0	142	0	0	0	0	0
20	0	227	0	0	0	0	1	100
20	5	227	0	0	0	0	1	100
20	7	227	0	0	0	0	1	100
20	10	227	0	0	0	0	1	100
20	12	224	3	3	0	0	0.986784	98.6784
20	14	224	3	0	0	0	0.986784	98.6784
20	17	214	13	8	2	0	0.942731	94.2731
20	19	202	25	5	7	0	0.889868	88.9868
20	21	180	47	10	12	0	0.792952	79.2952
20	24	116	111	31	33	0	0.511013	51.1013
20	26	86	141	26	4	0	0.378855	37.8855
20	29	21	206	59	6	0	0.092511	9.2511
20	31	7	220	14	0	0	0.030837	3.0837
20	33	1	226	6	0	0	0.00440529	0.440529
20	35	0	227	1	0	0	0	0
20	38	0	227	0	0	0	0	0
20	40	0	227	0	0	0	0	0
20		0	227	0	0	0	0	0
21	0	154	0	0	0	0	1	100
21	5	154	0	0	0	0	1	100
21	7	154	0	0	0	0	1	100
21	10	154	0	0	0	0	1	100
21	12	154	0	0	0	0	1	100
21	14	154	0	0	0	0	1	100
21	17	154	0	0	0	0	1	100
21	19	146	8	7	1	0	0.948052	94.8052
21	21	127	27	4	15	0	0.824675	82.4675
21	24	106	48	17	4	0	0.688312	68.8312
21	26	68	86	31	7	0	0.441558	44.1558
21	29	38	116	29	1	0	0.246753	24.6753
21	31	29	125	9	0	0	0.188312	18.8312
21	33	11	143	18	0	0	0.0714286	7.14286
21	35	5	149	6	0	0	0.0324675	3.24675
21	38	0	154	5	0	0	0	0
21	40	0	154	0	0	0	0	0
21		0	154	0	0	0	0	0

## Sheet: stats
% WT [41]					condition	chi	pvalue	corrected_pvalue
#days	dead	censored			WT v.s. fmo-2 OE	27.63	1.5e-07	7.3e-07
0					WT v.s. fmo-4 OE	11.56	0.0007	0.0034
3	3				WT v.s. fmo-4 KO	0.43	0.511	1
4	9				WT v.s. fmo-2O;4KO	2.16	0.142	0.7102
5	17				WT v.s. fmo-2O;4OE	38.66	0	0
6	12				fmo-2 OE v.s. WT	27.63	1.5e-07	7.3e-07
7					fmo-2 OE v.s. fmo-4 OE	8.78	0.003	0.0152
8					fmo-2 OE v.s. fmo-4 KO	46.84	0	0
9					fmo-2 OE v.s. fmo-2O;4KO	34.78	3.7e-09	1.9e-08
10					fmo-2 OE v.s. fmo-2O;4OE	3.48	0.062	0.3099
11					fmo-4 OE v.s. WT	11.56	0.0007	0.0034
12					fmo-4 OE v.s. fmo-2 OE	8.78	0.003	0.0152
					fmo-4 OE v.s. fmo-4 KO	25.04	5.6e-07	2.8e-06
					fmo-4 OE v.s. fmo-2O;4KO	9.93	0.0016	0.0081
					fmo-4 OE v.s. fmo-2O;4OE	18.54	1.7e-05	0.0001
					fmo-4 KO v.s. WT	0.43	0.511	1
					fmo-4 KO v.s. fmo-2 OE	46.84	0	0
					fmo-4 KO v.s. fmo-4 OE	25.04	5.6e-07	2.8e-06
					fmo-4 KO v.s. fmo-2O;4KO	8.62	0.0033	0.0166
					fmo-4 KO v.s. fmo-2O;4OE	61.89	0	0
					fmo-2O;4KO v.s. WT	2.16	0.142	0.7102
% fmo-2 OE [62]					fmo-2O;4KO v.s. fmo-2 OE	34.78	3.7e-09	1.9e-08
#days	dead	censored			fmo-2O;4KO v.s. fmo-4 OE	9.93	0.0016	0.0081
0					fmo-2O;4KO v.s. fmo-4 KO	8.62	0.0033	0.0166
3	1				fmo-2O;4KO v.s. fmo-2O;4OE	51.01	0	0
4	4				fmo-2O;4OE v.s. WT	38.66	0	0
5	14				fmo-2O;4OE v.s. fmo-2 OE	3.48	0.062	0.3099
6	20				fmo-2O;4OE v.s. fmo-4 OE	18.54	1.7e-05	0.0001
7	20				fmo-2O;4OE v.s. fmo-4 KO	61.89	0	0
8	2				fmo-2O;4OE v.s. fmo-2O;4KO	51.01	0	0
9	1
10
11
12
% fmo-4 OE[58]
#days	dead	censored
0
3	2
4	3
5	21
6	25
7	7
8
9
10
11
12
% fmo-4 KO [74]
#days	dead	censored
0
3	3
4	11
5	50
6	10
7
8
9
10
11
12
% fmo-2O;4KO [96]
#days	dead	censored
0
3	3
4	10
5	49
6	34
7
8
9
10
11
12
% fmo-2O;4OE [71]
#days	dead	censored
0
3	1
4	3
5	15
6	18
7	24
8	3
9	5
10	2
11
12

## Sheet: Sheet2
condition	chi	pvalue	corrected_pvalue
WT v.s. fmo-2 OE	27.63	1.5e-07	5.9e-07	****
WT v.s. fmo-4 OE	11.56	0.0007	0.0027	****
WT v.s. fmo-4 KO	0.43	0.511	1	ns
WT v.s. fmo-2O;4KO	2.16	0.142	0.5682	ns
fmo-2 OE v.s. WT	27.63	1.5e-07	5.9e-07
fmo-2 OE v.s. fmo-4 OE	8.78	0.003	0.0122
fmo-2 OE v.s. fmo-4 KO	46.84	0	0
fmo-2 OE v.s. fmo-2O;4KO	34.78	3.7e-09	1.5e-08
fmo-4 OE v.s. WT	11.56	0.0007	0.0027
fmo-4 OE v.s. fmo-2 OE	8.78	0.003	0.0122
fmo-4 OE v.s. fmo-4 KO	25.04	5.6e-07	2.2e-06
fmo-4 OE v.s. fmo-2O;4KO	9.93	0.0016	0.0065
fmo-4 KO v.s. WT	0.43	0.511	1
fmo-4 KO v.s. fmo-2 OE	46.84	0	0
fmo-4 KO v.s. fmo-4 OE	25.04	5.6e-07	2.2e-06
fmo-4 KO v.s. fmo-2O;4KO	8.62	0.0033	0.0133
fmo-2O;4KO v.s. WT	2.16	0.142	0.5682
fmo-2O;4KO v.s. fmo-2 OE	34.78	3.7e-09	1.5e-08
fmo-2O;4KO v.s. fmo-4 OE	9.93	0.0016	0.0065
fmo-2O;4KO v.s. fmo-4 KO	8.62	0.0033	0.0133

## Sheet: Sheet1
#1	N2								#1	N2					#1	N2
#2	Lei42	fmo-2p::MC; unc-119p::HIF-1(P621A); JT307 #1							#2	Lei42	fmo-2p::MC; unc-119p::HIF-1(P621A); JT307 #1				#11L	Lei51	fmo-2p::MC; JT307; gcy-31; gcy-36 - XA2262 sibling #1
#3	Lei43	fmo-2p::MC; unc-119p::HIF-1(P621A); JT307 #2							#3	Lei43	fmo-2p::MC; unc-119p::HIF-1(P621A); JT307 #2				#12L	Lei52	fmo-2p::MC; JT307; gcy-33; gcy-36 - XA2262 sibling #1
#4	Lei44	fmo-2p::MC; TU3311; CB5602 #1							#4	Lei44	fmo-2p::MC; TU3311; CB5602 #1				#13	Lei53	fmo-2p::MC; JT307; gcy-33; gcy-36 - XA2262 sibling #2
#5	Lei45	fmo-2p::MC; TU3311 #1							#5	Lei45	fmo-2p::MC; TU3311 #1				#14L	Lei55	fmo-2p::MC; JT307 - XA2262 sibling #1
#6	Lei46	fmo-2p::MC; CB5602 #1							#6	Lei46	fmo-2p::MC; CB5602 #1				#15L	Lei56	fmo-2p::MC; JT307 - XA2262 sibling #2
#7	Lei47	fmo-2p::MC; TU3311; CB5602 #2							#7	Lei47	fmo-2p::MC; TU3311; CB5602 #2				#16	Lei57	fmo-2p::MC - XA2262 sibling #1
#8L	Lei48	fmo-2p::MC; JT307; XA2262 #1													#17	Lei58	fmo-2p::MC - XA2262 sibling #2
#9	Lei49	fmo-2p::MC; JT307; XA2262 #2													#18	Lei59	fmo-2p::MC; gcy-33; gcy-36 - XA2262 sibling #1
#10L	Lei50	fmo-2p::MC; JT307; XA2262 #3							#1	N2					#19	Lei60	fmo-2p::MC; gcy-33; gcy-36 - XA2262 sibling #2
#11L	Lei51	fmo-2p::MC; JT307; gcy-31; gcy-36 - XA2262 sibling #1							#8L	Lei48	fmo-2p::MC; JT307; XA2262 #1
#12L	Lei52	fmo-2p::MC; JT307; gcy-33; gcy-36 - XA2262 sibling #1							#9	Lei49	fmo-2p::MC; JT307; XA2262 #2
#13	Lei53	fmo-2p::MC; JT307; gcy-33; gcy-36 - XA2262 sibling #2							#10L	Lei50	fmo-2p::MC; JT307; XA2262 #3
#14L	Lei55	fmo-2p::MC; JT307 - XA2262 sibling #1							#14L	Lei55	fmo-2p::MC; JT307 - XA2262 sibling #1
#15L	Lei56	fmo-2p::MC; JT307 - XA2262 sibling #2							#15L	Lei56	fmo-2p::MC; JT307 - XA2262 sibling #2
#16	Lei57	fmo-2p::MC - XA2262 sibling #1							#16	Lei57	fmo-2p::MC - XA2262 sibling #1
#17	Lei58	fmo-2p::MC - XA2262 sibling #2							#17	Lei58	fmo-2p::MC - XA2262 sibling #2
#18	Lei59	fmo-2p::MC; gcy-33; gcy-36 - XA2262 sibling #1							#20	Lei61	fmo-2p::MC; XA2262 #1
#19	Lei60	fmo-2p::MC; gcy-33; gcy-36 - XA2262 sibling #2							#21	Lei62	fmo-2p::MC; XA2262 #2
#20	Lei61	fmo-2p::MC; XA2262 #1
#21	Lei62	fmo-2p::MC; XA2262 #2
