# Supplementary material for: fmo-4 promotes longevity and stress resistance via ER to mitochondria calcium regulation in C. elegans
Source: eLife journal article supplement (doi:10.7554/elife.99971), 2024-08-27
Supplement: fig2-data2 [file 09.10.2021 fmo4 stress resistance assay 4oe 2o4o 2o4k.xlsx]

## Sheet: data
strain	day	alive	dead-total	dead-normal	dead-ruptured	censored	ratio-alive	percentage-alive
N2	0	46	0		0	0	1	100
N2	3	22	24	24	0	0	0.478261	47.8261
N2	4	5	41	17	0	0	0.108696	10.8696						1	2	3	4	5	6	7	8	9	10	11	12							#19	#20	#21
N2	5	0	46	5		0	0	0			plot data here-->		day	Wild-Type	FMO-2 OE	FMO-4 OE	fmo-4 KO	FMO-2OE;4OE	fmo-2O;4K													Lei60	Lei61	Lei62
N2	6	0	46			0	0	0				0	0	100	100	100	100	100	100
N2	7	0	46			0	0	0				3	3	47.8261	69.2308	52.459	43.9024	59.6154	37.3134
N2	8	0	46			0	0	0				4	4	10.8696	46.1538	26.2295	9.7561	26.9231	4.47761
N2	9	0	46			0	0	0				5	5	0	21.1538	13.1148	0	21.1538	0
N2	10	0	46			0	0	0				6	6		13.4615	3.27869		13.4615
N2	11	0	46			0	0	0				7	7		5.76923	0		11.5385
N2	12	0	46			0	0	0				8	8		3.84615			1.92308
N2	13	0	46			0	0	0				9	9		3.84615			0
N2	14	0	46			0	0	0				10	10		1.92308
N2	15	0	46			0	0	0				11	11		1.92308
N2	16	0	46			0	0	0				12	12		0
N2	17	0	46			0	0	0
N2	18	0	46			0	0	0
N2	19	0	46		0	0	0	0
N2	20	0	46		0	0	0	0
C9	0	52	0		0	0	1	100
C9	3	36	16	16		0	0.692308	69.2308
C9	4	24	28	12		0	0.461538	46.1538
C9	5	11	41	13		0	0.211538	21.1538
C9	6	7	45	4		0	0.134615	13.4615
C9	7	3	49	4		0	0.0576923	5.76923
C9	8	2	50	1		0	0.0384615	3.84615
C9	9	2	50	0		0	0.0384615	3.84615
C9	10	1	51	1		0	0.0192308	1.92308
C9	11	1	51	0		0	0.0192308	1.92308
C9	12	0	52	1		0	0	0
C9	13	0	52			0	0	0
C9	14	0	52			0	0	0
C9	15	0	52			0	0	0
C9	16	0	52			0	0	0
C9	17	0	52			0	0	0
C9	18	0	52			0	0	0
C9	19	0	52			0	0	0
C9	20	0	52		0	0	0	0
4OE	0	61	0			0	1	100
4OE	3	32	29	29		0	0.52459	52.459
4OE	4	16	45	16		0	0.262295	26.2295
4OE	5	8	53	8		0	0.131148	13.1148
4OE	6	2	59	6		0	0.0327869	3.27869
4OE	7	0	61	2		0	0	0
4OE	8	0	61			0	0	0
4OE	9	0	61			0	0	0
4OE	10	0	61			0	0	0
4OE	11	0	61			0	0	0
4OE	12	0	61			0	0	0
4OE	13	0	61			0	0	0
4OE	14	0	61			0	0	0
4OE	15	0	61			0	#DIV/0!	#DIV/0!
4OE	16	0	61			0	#DIV/0!	#DIV/0!
4OE	17	0	61			0	#DIV/0!	#DIV/0!
4OE	18	0	61		0	0	#DIV/0!	#DIV/0!
4OE	19	0	61		0	0	#DIV/0!	#DIV/0!
4OE	20	0	61		0	0	#DIV/0!	#DIV/0!
4KO	0	82	0		0	0	1	100
4KO	3	36	46	46		0	0.439024	43.9024
4KO	4	8	74	28		0	0.097561	9.7561
4KO	5	0	82	8		0	0	0
4KO	6	0	82			0	0	0
4KO	7	0	82				0	0
4KO	8	0	82			0	0	0
4KO	9	0	82			0	0	0
4KO	10	0	82			0	0	0
4KO	11	0	82			0	0	0
4KO	12	0	82			0	0	0
4KO	13	0	82			0	0	0
4KO	14	0	82			0	0	0
4KO	15	0	82			0	0	0
4KO	16	0	82			0	0	0
4KO	17	0	82	0	0	0	0	0
4KO	18	0	82		0	0	0	0
4KO	19	0	82		0	0	0	0
4KO	20	0	82		0	0	0	0
2O;4O	0	52	0	0	0	0	1	100
2O;4O	3	31	21	21	0	0	0.596154	59.6154
2O;4O	4	14	38	17	0	0	0.269231	26.9231
2O;4O	5	11	41	3		0	0.211538	21.1538
2O;4O	6	7	45	4		0	0.134615	13.4615
2O;4O	7	6	46	1		0	0.115385	11.5385
2O;4O	8	1	51	5		0	0.0192308	1.92308
2O;4O	9	0	52	1		0	0	0
2O;4O	10	0	52			0	0	0
2O;4O	11	0	52			0	0	0
2O;4O	12	0	52			0	0	0
2O;4O	13	0	52			0	0	0
2O;4O	14	0	52			0	0	0
2O;4O	15	0	52			0	0	0
2O;4O	16	0	52			0	0	0
2O;4O	17	0	52	0		0	0	0
2O;4O	18	0	52	0		0	0	0
2O;4O	19	0	52	0	0	0	0	0
2O;4O	20	0	52	0	0	0	0	0
2O;4K	0	67	0	0	0	0	1	100
2O;4K	3	25	42	42	0	0	0.373134	37.3134
2O;4K	4	3	64	22	0	0	0.0447761	4.47761
2O;4K	5	0	67	3	0	0	0	0
2O;4K	6	0	67			0	0	0
2O;4K	7	0	67			0	0	0
2O;4K	8	0	67			0	0	0
2O;4K	9	0	67			0	0	0
2O;4K	10	0	67			0	0	0
2O;4K	11	0	67			0	0	0
2O;4K	12	0	67			0	0	0
2O;4K	13	0	67			0	0	0
2O;4K	14	0	67			0	0	0
2O;4K	15	0	67			0	0	0
2O;4K	16	0	67			0	0	0
2O;4K	17	0	67			0	0	0
2O;4K	18	0	67			0	0	0
2O;4K	19	0	67			0	0	0
2O;4K	20	0	67		0	0	0	0
7	0	86	0	0	0	0	1	100
7	5	86	0	0	0	0	1	100
7	7	86	0	0	0	0	1	100
7	10	86	0	0	0	0	1	100
7	13	79	7	7	0	0	0.918605	91.8605
7	16	78	8	1		0	0.906977	90.6977
7	17	78	8	0		0	0.906977	90.6977
7	20	77	9	1		0	0.895349	89.5349
7	22	73	13	4		0	0.848837	84.8837
7	24	71	15	2		0	0.825581	82.5581
7	27	71	15	0		0	0.825581	82.5581
7	29	71	15			0	0.825581	82.5581
7	31	71	15			0	0.825581	82.5581
7	34	71	15			0	0.825581	82.5581
7	36	71	15			0	0.825581	82.5581
7	38	71	15			0	0.825581	82.5581
7	41	71	15		0	0	0.825581	82.5581
7	44	71	15		0	0	0.825581	82.5581
7	46	71	15		0	0	0.825581	82.5581
8	0	103	0	0	0	0	1	100
8	5	103	0	0	0	0	1	100
8	7	103	0	0	0	0	1	100
8	10	103	0	0	0	0	1	100
8	13	101	2	2	0	0	0.980583	98.0583
8	16	100	3	1	0	0	0.970874	97.0874
8	17	100	3	0		0	0.970874	97.0874
8	20	97	6	3		0	0.941748	94.1748
8	22	97	6	0		0	0.941748	94.1748
8	24	96	7	1		0	0.932039	93.2039
8	27	94	9	2		0	0.912621	91.2621
8	29	94	9			0	0.912621	91.2621
8	31	94	9			0	0.912621	91.2621
8	34	94	9			0	0.912621	91.2621
8	36	94	9			0	0.912621	91.2621
8	38	94	9	0	0	0	0.912621	91.2621
8	41	94	9	0	0	0	0.912621	91.2621
8	44	94	9	0	0	0	0.912621	91.2621
	46
9	0	96	0	0	0	0	1	100
9	5	96	0	0	0	0	1	100
9	7	96	0	0	0	0	1	100
9	10	96	0	0	0	0	1	100
9	13	92	4	4	0	0	0.958333	95.8333
9	16	88	8	3	1	0	0.916667	91.6667
9	17	83	13	5		0	0.864583	86.4583
9	20	77	19	6		0	0.802083	80.2083
9	22	74	22	3		0	0.770833	77.0833
9	24	70	26	4		0	0.729167	72.9167
9	27	62	34	8		0	0.645833	64.5833
9	29	62	34			0	0.645833	64.5833
9	31	62	34			0	0.645833	64.5833
9	34	62	34			0	0.645833	64.5833
9	36	62	34			0	0.645833	64.5833
9	38	62	34			0	0.645833	64.5833
9	41	62	34			0	0.645833	64.5833
9	44	62	34			0	0.645833	64.5833
9	46	62	34		0		0.645833	64.5833
9	47	62	34		0		0.645833	64.5833
10L	0	78	0	0	0	0	1	100
10	5	78	0	0	0	0	1	100
10	7	78	0	0	0	0	1	100
10	10	78	0	0	0	0	1	100
10	13	72	6	6		0	0.923077	92.3077
10	16	67	11	5		0	0.858974	85.8974
10	17	67	11	0		0	0.858974	85.8974
10	20	65	13	2		0	0.833333	83.3333
10	22	63	15	2		0	0.807692	80.7692
10	24	57	21	6		0	0.730769	73.0769
10	27	47	31	10		0	0.602564	60.2564
10	29	47	31			0	0.602564	60.2564
10	31	47	31			0	0.602564	60.2564
10	34	47	31			0	0.602564	60.2564
10	36	47	31		0	0	0.602564	60.2564
10	38	47	31		0	0	0.456311	45.6311
10	41	47	31		0	0	0.456311	45.6311
10	44	47	31		0	0	0.456311	45.6311
	46	47	31		0	0	0.456311	45.6311
	48	47	31		0	0	0.456311	45.6311
11L	0	104	0	0	0	0	1	100
11	5	104	0	0	0	0	1	100
11	7	104	0	0	0	0	1	100
11	11	104	0	0	0	0	1	100
11	13	102	2	1	1	0	0.980769	98.0769
11	16	101	3	1		0	0.971154	97.1154
11	18	98	6	2	1	0	0.942308	94.2308
11	20	94	10	3	1	0	0.903846	90.3846
11	23	85	19	9	0	0	0.817308	81.7308
11	25	73	31	12		0	0.701923	70.1923
11	27	59	45	14		0	0.567308	56.7308
11	30	30	74	29		0	0.288462	28.8462
11	32	8	96	22		0	0.0769231	7.69231
11	34	5	99	3		0	0.0480769	4.80769
11	37	1	103	4	0	0	0.00961538	0.961538
11	39	0	104	1	0	0	0	0
11	41	0	104	0	0	0	0	0
11	44	0	104	0	0	0	0	0
	46
12L	0	62	0	0	0	0	1	100
12	5	62	0	0	0	0	1	100
12	7	62	0	0	0	0	1	100
12	11	62	0	0	0	0	1	100
12	13	45	17	17	0	0	0.725806	72.5806
12	16	42	20	3		0	0.677419	67.7419
12	18	42	20	0		0	0.677419	67.7419
12	20	40	22	2		0	0.645161	64.5161
12	23	36	26	4		0	0.580645	58.0645
12	25	33	29	3		0	0.532258	53.2258
12	27	32	30	1		0	0.516129	51.6129
12	30	23	39	9		0	0.370968	37.0968
12	32	14	48	9		0	0.225806	22.5806
12	34	13	49	1		0	0.209677	20.9677
12	37	7	55	6		0	0.112903	11.2903
12	39	0	62	7		0	0	0
12	41	0	62	0	0	0	0	0
12	44	0	62	0	0	0	0	0
	46
13	0	48	0	0	0	0	1	100
13	5	48	0	0	0	0	1	100
13	7	48	0	0	0	0	1	100
13	11	48	0	0	0	0	1	100
13	14	48	0	0	0	0	1	100
13	16	46	2	1	1	0	0.958333	95.8333
13	18	40	8	4	2	0	0.833333	83.3333
13	21	32	16	6	2	0	0.666667	66.6667
13	23	22	26	10	0	0	0.458333	45.8333
13	25	10	38	12		0	0.208333	20.8333
13	28	10	38			0	0.208333	20.8333
13	30	10	38			0	0.208333	20.8333
13	32	10	38			0	0.208333	20.8333
13	35	10	38			0	0.208333	20.8333
13	37	10	38			0	0.208333	20.8333
13	39	10	38			0	0.208333	20.8333
13	42	10	38			0	0.208333	20.8333
13	44	10	38			0	0.208333	20.8333
13	45	10	38				0.208333	20.8333
14L	0	51	0	0	0	0	1	100
14	5	51	0	0	0	0	1	100
14	7	51	0	0	0	0	1	100
14	11	51	0	0	0	0	1	100
14	14	50	1	0	1	0	0.980392	98.0392
14	16	49	2	1	0	0	0.960784	96.0784
14	18	42	9	7	0	0	0.823529	82.3529
14	21	27	24	13	2	0	0.529412	52.9412
14	23	17	34	10	0	0	0.333333	33.3333
14	25	12	39	5		0	0.235294	23.5294
14	28	12	39			0	0.235294	23.5294
14	30	12	39			0	0.235294	23.5294
14	32	12	39			0	0.235294	23.5294
14	35	12	39			0	0.235294	23.5294
14	37	12	39			0	0.235294	23.5294
14	39	12	39			0	0.235294	23.5294
14	42	12	39	0	0	0	0.235294	23.5294
14	44	12	39	0	0	0	0.235294	23.5294
15L	0	156	0	0	0	0	1	100
15	5	156	0	0	0	0	1	100
15	7	156	0	0	0	0	1	100
15	10	156	0	0	0	0	1	100
15	12	153	3	3	0	0	0.980769	98.0769
15	14	153	3	0	0	0	0.980769	98.0769
15	17	151	5	2	0	0	0.967949	96.7949
15	19	151	5	0	0	0	0.967949	96.7949
15	21	143	13	4	4	0	0.916667	91.6667
15	24	120	36	18	5	0	0.769231	76.9231
15	26	99	57	18	3	0	0.634615	63.4615
15	29	18	138	81	0	0	0.115385	11.5385
15	31	4	152	14	0	0	0.025641	2.5641
15	33	0	156	4	0	0	0	0
15	35	0	156	0	0	0	0	0
15	38	0	156	0	0	0	0	0
15	40	0	156	0	0	0	0	0
15		0	156	0	0	0	0	0
16	0	156	0	0	0	0	1	100
16	5	156	0	0	0	0	1	100
16	7	156	0	0	0	0	1	100
16	10	156	0	0	0	0	1	100
16	12	154	2	2	0	0	0.987179	98.7179
16	14	154	2	0	0	0	0.987179	98.7179
16	17	154	2	0	0	0	0.987179	98.7179
16	19	148	8	4	2	0	0.948718	94.8718
16	21	136	20	4	8	0	0.871795	87.1795
16	24	98	58	10	28	0	0.628205	62.8205
16	26	79	77	11	8	0	0.50641	50.641
16	29	27	129	52	0	0	0.173077	17.3077
16	31	18	138	9	0	0	0.115385	11.5385
16	33	7	149	11	0	0	0.0448718	4.48718
16	35	2	154	5	0	0	0.0128205	1.28205
16	38	1	155	1	0	0	0.00641026	0.641026
16	40	1	155	0	0	0	0.00641026	0.641026
16	42	0	156	1	0	0	0	0
17	0	134	0	0	0	0	1	100
17	5	134	0	0	0	0	1	100
17	7	134	0	0	0	0	1	100
17	10	134	0	0	0	0	1	100
17	12	132	2	2	0	0	0.985075	98.5075
17	14	132	2	0	0	0	0.985075	98.5075
17	17	132	2	0	0	0	0.985075	98.5075
17	19	124	10	4	4	0	0.925373	92.5373
17	21	109	25	5	10	0	0.813433	81.3433
17	24	90	44	10	9	0	0.671642	67.1642
17	26	70	64	15	5	0	0.522388	52.2388
17	29	34	100	36	0	0	0.253731	25.3731
17	31	23	111	11	0	0	0.171642	17.1642
17	33	3	131	20	0	0	0.0223881	2.23881
17	35	1	133	2	0	0	0.00746269	0.746269
17	38	1	133	0	0	0	0.00746269	0.746269
17	40	0	134	1	0	0	0	0
17		0	134	0	0	0	0	0
18	0	233	0	0	0	0	1	100
18	5	233	0	0	0	0	1	100
18	7	233	0	0	0	0	1	100
18	10	233	0	0	0	0	1	100
18	12	233	0	0	0	0	1	100
18	14	232	1	1	0	0	0.995708	99.5708
18	17	221	12	10	1	0	0.948498	94.8498
18	19	219	14	1	1	0	0.939914	93.9914
18	21	212	21	3	4	0	0.909871	90.9871
18	24	180	53	24	8	0	0.772532	77.2532
18	26	136	97	39	5	0	0.583691	58.3691
18	29	72	161	62	2	0	0.309013	30.9013
18	31	59	174	13	0	0	0.253219	25.3219
18	33	36	197	23	0	0	0.154506	15.4506
18	35	27	206	9	0	0	0.11588	11.588
18	38	15	218	12	0	0	0.0643777	6.43777
18	40	7	226	8	0	0	0.0300429	3.00429
18	42	7	226	0	0	0	0.0300429	3.00429
18	45	0	233	7	0	0	0	0
19	0	142	0	0	0	0	1	100
19	5	142	0	0	0	0	1	100
19	7	142	0	0	0	0	1	100
19	10	142	0	0	0	0	1	100
19	12	140	2	2	0	0	0.985915	98.5915
19	14	137	5	2	1	0	0.964789	96.4789
19	17	128	14	7	2	0	0.901408	90.1408
19	19	121	21	0	7	0	0.852113	85.2113
19	21	115	27	3	3	0	0.809859	80.9859
19	24	81	61	21	13	0	0.570423	57.0423
19	26	48	94	26	7	0	0.338028	33.8028
19	29	21	121	27	0	0	0.147887	14.7887
19	31	11	131	10	0	0	0.0774648	7.74648
19	33	2	140	9	0	0	0.0140845	1.40845
19	35	1	141	1	0	0	0.00704225	0.704225
19	38	0	142	1	0	0	0	0
19	40	0	142	0	0	0	0	0
19		0	142	0	0	0	0	0
20	0	227	0	0	0	0	1	100
20	5	227	0	0	0	0	1	100
20	7	227	0	0	0	0	1	100
20	10	227	0	0	0	0	1	100
20	12	224	3	3	0	0	0.986784	98.6784
20	14	224	3	0	0	0	0.986784	98.6784
20	17	214	13	8	2	0	0.942731	94.2731
20	19	202	25	5	7	0	0.889868	88.9868
20	21	180	47	10	12	0	0.792952	79.2952
20	24	116	111	31	33	0	0.511013	51.1013
20	26	86	141	26	4	0	0.378855	37.8855
20	29	21	206	59	6	0	0.092511	9.2511
20	31	7	220	14	0	0	0.030837	3.0837
20	33	1	226	6	0	0	0.00440529	0.440529
20	35	0	227	1	0	0	0	0
20	38	0	227	0	0	0	0	0
20	40	0	227	0	0	0	0	0
20		0	227	0	0	0	0	0
21	0	154	0	0	0	0	1	100
21	5	154	0	0	0	0	1	100
21	7	154	0	0	0	0	1	100
21	10	154	0	0	0	0	1	100
21	12	154	0	0	0	0	1	100
21	14	154	0	0	0	0	1	100
21	17	154	0	0	0	0	1	100
21	19	146	8	7	1	0	0.948052	94.8052
21	21	127	27	4	15	0	0.824675	82.4675
21	24	106	48	17	4	0	0.688312	68.8312
21	26	68	86	31	7	0	0.441558	44.1558
21	29	38	116	29	1	0	0.246753	24.6753
21	31	29	125	9	0	0	0.188312	18.8312
21	33	11	143	18	0	0	0.0714286	7.14286
21	35	5	149	6	0	0	0.0324675	3.24675
21	38	0	154	5	0	0	0	0
21	40	0	154	0	0	0	0	0
21		0	154	0	0	0	0	0

## Sheet: stats
% WT [46]					condition	chi	pvalue	corrected_pvalue
#days	dead	censored			WT v.s. fmo-2 OE	16.49	4.9e-05	0.0002
0					WT v.s. WT fmo-4 OE	4.16	0.0414	0.2072
3	24				WT v.s. fmo-4 KO	0.15	0.6952	1
4	17				WT v.s. fmo-2O;4O	9	0.0027	0.0135
5	5				WT v.s. fmo-2O;4KO	2.03	0.1543	0.7713
6					fmo-2 OE v.s. WT	16.49	4.9e-05	0.0002
7					fmo-2 OE v.s. WT fmo-4 OE	6.12	0.0133	0.0667
8					fmo-2 OE v.s. fmo-4 KO	25.5	4.4e-07	2.2e-06
9					fmo-2 OE v.s. fmo-2O;4O	0.86	0.3538	1
10					fmo-2 OE v.s. fmo-2O;4KO	29.56	5.4e-08	2.7e-07
11					WT fmo-4 OE v.s. WT	4.16	0.0414	0.2072
12					WT fmo-4 OE v.s. fmo-2 OE	6.12	0.0133	0.0667
					WT fmo-4 OE v.s. fmo-4 KO	7.7	0.0055	0.0276
					WT fmo-4 OE v.s. fmo-2O;4O	3.74	0.0533	0.2663
					WT fmo-4 OE v.s. fmo-2O;4KO	11.1	0.0009	0.0043
					fmo-4 KO v.s. WT	0.15	0.6952	1
					fmo-4 KO v.s. fmo-2 OE	25.5	4.4e-07	2.2e-06
					fmo-4 KO v.s. WT fmo-4 OE	7.7	0.0055	0.0276
					fmo-4 KO v.s. fmo-2O;4O	16.33	0.0001	0.0003
					fmo-4 KO v.s. fmo-2O;4KO	1.39	0.2392	1
					fmo-2O;4O v.s. WT	9	0.0027	0.0135
% fmo-2 OE [52]					fmo-2O;4O v.s. fmo-2 OE	0.86	0.3538	1
#days	dead	censored			fmo-2O;4O v.s. WT fmo-4 OE	3.74	0.0533	0.2663
0					fmo-2O;4O v.s. fmo-4 KO	16.33	0.0001	0.0003
3	16				fmo-2O;4O v.s. fmo-2O;4KO	19.61	9.5e-06	4.7e-05
4	12				fmo-2O;4KO v.s. WT	2.03	0.1543	0.7713
5	13				fmo-2O;4KO v.s. fmo-2 OE	29.56	5.4e-08	2.7e-07
6	4				fmo-2O;4KO v.s. WT fmo-4 OE	11.1	0.0009	0.0043
7	4				fmo-2O;4KO v.s. fmo-4 KO	1.39	0.2392	1
8	1				fmo-2O;4KO v.s. fmo-2O;4O	19.61	9.5e-06	4.7e-05
9	0
10	1
11	0
12	1
% WT fmo-4 OE[61]
#days	dead	censored
0
3	29
4	16
5	8
6	6
7	2
8
9
10
11
12
% fmo-4 KO [82]
#days	dead	censored
0
3	46
4	28
5	8
6
7
8
9
10
11
12
% fmo-2O;4O [52]
#days	dead	censored
0	0
3	21
4	17
5	3
6	4
7	1
8	5
9	1
10
11
12
% fmo-2O;4KO [67]
#days	dead	censored
0	0
3	42
4	22
5	3
6
7
8
9
10
11
12
% fmo-2O;4O [52]
#days	dead	censored
0	0
3	21
4	17
5	3
6	4
7	1
8	5
9	1
10
11
12

## Sheet: Sheet2
condition	chi	pvalue	corrected_pvalue
WT v.s. fmo-2 OE	16.49	4.9e-05	0.0002
WT v.s. WT fmo-4 OE	4.16	0.0414	0.2072
WT v.s. fmo-4 KO	0.15	0.6952	1
WT v.s. fmo-2O;4O	7.43	0.0064	0.032
WT v.s. fmo-2O;4KO	2.03	0.1543	0.7713
fmo-2 OE v.s. WT	16.49	4.9e-05	0.0002
fmo-2 OE v.s. WT fmo-4 OE	6.12	0.0133	0.0667
fmo-2 OE v.s. fmo-4 KO	25.5	4.4e-07	2.2e-06
fmo-2 OE v.s. fmo-2O;4O	0.74	0.3912	1
fmo-2 OE v.s. fmo-2O;4KO	29.56	5.4e-08	2.7e-07
WT fmo-4 OE v.s. WT	4.16	0.0414	0.2072
WT fmo-4 OE v.s. fmo-2 OE	6.12	0.0133	0.0667
WT fmo-4 OE v.s. fmo-4 KO	7.7	0.0055	0.0276
WT fmo-4 OE v.s. fmo-2O;4O	2.94	0.0864	0.4318
WT fmo-4 OE v.s. fmo-2O;4KO	11.1	0.0009	0.0043
fmo-4 KO v.s. WT	0.15	0.6952	1
fmo-4 KO v.s. fmo-2 OE	25.5	4.4e-07	2.2e-06
fmo-4 KO v.s. WT fmo-4 OE	7.7	0.0055	0.0276
fmo-4 KO v.s. fmo-2O;4O	12.57	0.0004	0.002
fmo-4 KO v.s. fmo-2O;4KO	1.39	0.2392	1
fmo-2O;4O v.s. WT	7.43	0.0064	0.032
fmo-2O;4O v.s. fmo-2 OE	0.74	0.3912	1
fmo-2O;4O v.s. WT fmo-4 OE	2.94	0.0864	0.4318
fmo-2O;4O v.s. fmo-4 KO	12.57	0.0004	0.002
fmo-2O;4O v.s. fmo-2O;4KO	15.6	0.0001	0.0004
fmo-2O;4KO v.s. WT	2.03	0.1543	0.7713
fmo-2O;4KO v.s. fmo-2 OE	29.56	5.4e-08	2.7e-07
fmo-2O;4KO v.s. WT fmo-4 OE	11.1	0.0009	0.0043
fmo-2O;4KO v.s. fmo-4 KO	1.39	0.2392	1
fmo-2O;4KO v.s. fmo-2O;4O	15.6	0.0001	0.0004

## Sheet: Sheet1
#1	N2								#1	N2					#1	N2
#2	Lei42	fmo-2p::MC; unc-119p::HIF-1(P621A); JT307 #1							#2	Lei42	fmo-2p::MC; unc-119p::HIF-1(P621A); JT307 #1				#11L	Lei51	fmo-2p::MC; JT307; gcy-31; gcy-36 - XA2262 sibling #1
#3	Lei43	fmo-2p::MC; unc-119p::HIF-1(P621A); JT307 #2							#3	Lei43	fmo-2p::MC; unc-119p::HIF-1(P621A); JT307 #2				#12L	Lei52	fmo-2p::MC; JT307; gcy-33; gcy-36 - XA2262 sibling #1
#4	Lei44	fmo-2p::MC; TU3311; CB5602 #1							#4	Lei44	fmo-2p::MC; TU3311; CB5602 #1				#13	Lei53	fmo-2p::MC; JT307; gcy-33; gcy-36 - XA2262 sibling #2
#5	Lei45	fmo-2p::MC; TU3311 #1							#5	Lei45	fmo-2p::MC; TU3311 #1				#14L	Lei55	fmo-2p::MC; JT307 - XA2262 sibling #1
#6	Lei46	fmo-2p::MC; CB5602 #1							#6	Lei46	fmo-2p::MC; CB5602 #1				#15L	Lei56	fmo-2p::MC; JT307 - XA2262 sibling #2
#7	Lei47	fmo-2p::MC; TU3311; CB5602 #2							#7	Lei47	fmo-2p::MC; TU3311; CB5602 #2				#16	Lei57	fmo-2p::MC - XA2262 sibling #1
#8L	Lei48	fmo-2p::MC; JT307; XA2262 #1													#17	Lei58	fmo-2p::MC - XA2262 sibling #2
#9	Lei49	fmo-2p::MC; JT307; XA2262 #2													#18	Lei59	fmo-2p::MC; gcy-33; gcy-36 - XA2262 sibling #1
#10L	Lei50	fmo-2p::MC; JT307; XA2262 #3							#1	N2					#19	Lei60	fmo-2p::MC; gcy-33; gcy-36 - XA2262 sibling #2
#11L	Lei51	fmo-2p::MC; JT307; gcy-31; gcy-36 - XA2262 sibling #1							#8L	Lei48	fmo-2p::MC; JT307; XA2262 #1
#12L	Lei52	fmo-2p::MC; JT307; gcy-33; gcy-36 - XA2262 sibling #1							#9	Lei49	fmo-2p::MC; JT307; XA2262 #2
#13	Lei53	fmo-2p::MC; JT307; gcy-33; gcy-36 - XA2262 sibling #2							#10L	Lei50	fmo-2p::MC; JT307; XA2262 #3
#14L	Lei55	fmo-2p::MC; JT307 - XA2262 sibling #1							#14L	Lei55	fmo-2p::MC; JT307 - XA2262 sibling #1
#15L	Lei56	fmo-2p::MC; JT307 - XA2262 sibling #2							#15L	Lei56	fmo-2p::MC; JT307 - XA2262 sibling #2
#16	Lei57	fmo-2p::MC - XA2262 sibling #1							#16	Lei57	fmo-2p::MC - XA2262 sibling #1
#17	Lei58	fmo-2p::MC - XA2262 sibling #2							#17	Lei58	fmo-2p::MC - XA2262 sibling #2
#18	Lei59	fmo-2p::MC; gcy-33; gcy-36 - XA2262 sibling #1							#20	Lei61	fmo-2p::MC; XA2262 #1
#19	Lei60	fmo-2p::MC; gcy-33; gcy-36 - XA2262 sibling #2							#21	Lei62	fmo-2p::MC; XA2262 #2
#20	Lei61	fmo-2p::MC; XA2262 #1
#21	Lei62	fmo-2p::MC; XA2262 #2
