# Supplementary material for: fmo-4 promotes longevity and stress resistance via ER to mitochondria calcium regulation in C. elegans
Source: eLife journal article supplement (doi:10.7554/elife.99971), 2024-08-27
Supplement: fig3-data5 [file 06.12.2023 tunicamycin test 4OE hyp specific and 4OE ubiq.xlsx]

## Sheet: Sheet1
	WT	FMO-2 OE	FMO-4 OE	FMO-4 OE hyp 6.3	FMO-4 OE hyp 2.6
0ug/mL	100	100	100	100	100
1ug/mL	100	100	100	100	100
5ug/mL	0	100	0	0	0
