# Supplementary material for: fmo-4 promotes longevity and stress resistance via ER to mitochondria calcium regulation in C. elegans
Source: eLife journal article supplement (doi:10.7554/elife.99971), 2024-08-27
Supplement: fig3-data5 [file elife-99971-fig3-data5-v1.zip]

## Sheet: Sheet1
	WT	FMO-2 OE	FMO-4 OE	FMO-4 OE hyp sp	FMO-4 OE hyp 2.6
0µg/mL	100	100	100	100	100
1µg/mL	100	100	100	100	100
5µg/mL	0	100	0	0	0
