# Supplementary material for: fmo-4 promotes longevity and stress resistance via ER to mitochondria calcium regulation in C. elegans
Source: eLife journal article supplement (doi:10.7554/elife.99971), 2024-08-27
Supplement: fig3-figsupp1-data1 [file 01Feb2024 FMO4 paper Development Assay PAPER.xlsx]

## Sheet: Sheet1
plate number	1	2	3	4	5	6	7	8	9	10	Average	SD	Development Delay (Strain - N2)	Signifance
WT	70.5	71	69.5	69.4	71.5	70.5	70.5	69.5	69.5	69.5	70.14	0.757481	0
FMO-2 KO	71.5	70.5	70.5	71.5	70.5	72.5	71.5	72.5	72.5	69.5	71.3	1.0328	1.16	0.0103	*
FMO-4 KO	72.5	69.5	71.5	71.5	72.5	69.5	71.5	70.5	72.5	71.5	71.3	1.13529	1.16	0.0154	*
FMO-2 OE	72.5	73.5	71.5	71.5	70.5	69.5	69.5	71.5	72.5	71.5	71.4	1.28668	1.26	0.0159	*
FMO-4 OE ubiq	73.5	72.5	69.5	70.5	71.5	72.5	72.5	71.5	71.5	69.5	71.5	1.33333	1.36	0.0116	*
FMO-4 OE hyp sp	69.5	69.5	71.5	71.5	72.5	69.5	71.5	70.5	71.5	72.5	71	1.17851	0.86	0.0685	NS
FMO-4OE;2KO	71.5	69.5	70.5	71.5	71.5	69.5	71.5	72.5	70.5	70.5	70.9	0.966092	0.76	0.0669	NS
TEL 11-12pm 06APR2021	2024-01-29	72hrs = 12pm 02FEB2024

## Sheet: Sheet2
WT	fmo-1 KO	fmo-2 KO	fmo-2 OE	fmo-4 KO	fmo-2 OE; fmo-4 OE	fmo-2 OE; fmo-1 KO	fmo-2 KO; fmo-4 KO
69	69	69	69.5	70	69	69.5	70
69	69	-	-	71	70	69.5	74
68	69	75	69.5	73	-	69	74
69	69	74	70.5	73	70	68	71.5
68	68	-	70.5	70	69.5	68	75
68	69	72.5	70.5	70	69.5	69	74
68	71	72	69.5	70	70.5	69	75.5
68	69	73	69.5	70	69	71.5	70
68	69	71	71	73	69.5	68	70
69	69	69.5	71	73	69.5	69.5	72
ANOVA: Single Factor										DUNNETT'S TEST			alpha	0.05
										group	mean	size	ss	df	d-crit
DESCRIPTION					Alpha	0.05				WT	68.4	10	2.4
Group	Count	Sum	Mean	Variance	SS	Std Err	Lower	Upper		fmo-1 KO	69.1	10	4.9
WT	10	684	68.4	0.266667	2.4	0.411398	67.5791	69.2209		fmo-2 KO	72	8	30.5
fmo-1 KO	10	691	69.1	0.544444	4.9	0.411398	68.2791	69.9209		fmo-2 OE	70.1667	9	3.5
fmo-2 KO	8	576	72	4.35714	30.5	0.459957	71.0822	72.9178		fmo-4 KO	71.3	10	20.1
fmo-2 OE	9	631.5	70.1667	0.4375	3.5	0.433652	69.3013	71.032		fmo-2 OE; fmo-4 OE	69.6111	9	1.88889
fmo-4 KO	10	713	71.3	2.23333	20.1	0.411398	70.4791	72.1209		fmo-2 OE; fmo-1 KO	69.1	10	9.9
fmo-2 OE; fmo-4 OE	9	626.5	69.6111	0.236111	1.88889	0.433652	68.7458	70.4764		fmo-2 KO; fmo-4 KO	72.6	10	41.9
fmo-2 OE; fmo-1 KO	10	691	69.1	1.1	9.9	0.411398	68.2791	69.9209				76	115.089	68	2.68159
fmo-2 KO; fmo-4 KO	10	726	72.6	4.65556	41.9	0.411398	71.7791	73.4209		T TEST
										group	mean	std err	d-stat	lower	upper	p-value	mean-crit	Cohen d
ANOVA										fmo-1 KO	-0.7	0.581805	1.20315	-2.26016	0.860161	1	1.56016	0.538066
Sources	SS	df	MS	F	P value	F crit	RMSSE	Omega Sq		fmo-2 KO	-3.6	0.617097	5.83377	-5.2548	-1.9452	0	1.6548	2.7672
Between Groups	155.161	7	22.1659	13.0967	1.50375e-10	2.14753	1.16793	0.527		fmo-2 OE	-1.76667	0.597748	2.95554	-3.36958	-0.163754	0.0237859	1.60291	1.35798
Within Groups	115.089	68	1.69248							fmo-4 KO	-2.9	0.581805	4.98449	-4.46016	-1.33984	0	1.56016	2.22913
Total	270.25	75	3.60333							fmo-2 OE; fmo-4 OE	-1.21111	0.597748	2.02612	-2.81402	0.391802	1	1.60291	0.93094
										fmo-2 OE; fmo-1 KO	-0.7	0.581805	1.20315	-2.26016	0.860161	1	1.56016	0.538066
										fmo-2 KO; fmo-4 KO	-4.2	0.581805	7.21892	-5.76016	-2.63984	0	1.56016	3.2284
