# Supplementary material for: fmo-4 promotes longevity and stress resistance via ER to mitochondria calcium regulation in C. elegans
Source: eLife journal article supplement (doi:10.7554/elife.99971), 2024-08-27
Supplement: fig3-figsupp2-data1 [file elife-99971-fig3-figsupp2-data1-v1.zip]

## Sheet: data
strain	day	alive	dead-total	dead-normal	dead-ruptured	censored	ratio-alive	percentage-alive
N2	0	94	0	0	0	0	1	100
N2	5	94	0	0	0	0	1	100
N2	7	94	0	0	0	0	1	100						1	2	3	4	5	6	7				IF
N2	10	94	0	0	0	0	1	100			plot data here-->		day	WT fed	fmo-2 OE	fmo-2 KO fed	fmo-1	fmo-4 KO fed	fmo-4 OE	fmo-2O;1K	fmo-2O;4O	fmo-2O;4K	fmo-2K;4K	WT IF	fmo-2 OE	fmo-2 KO IF	fmo-1	fmo-4 KO IF	fmo-4 OE	fmo-2O;4O	fmo-2O;4K	fmo-2O;1K	fmo-2K;4K
N2	12	94			0	0	1	100				0	0	100	100	100	100	100	100	100	100	100	100	100	100	100	100	100	100	100	100	100	100
N2	14	94				0	1	100				5	5	100	100	100	100	100	100	100	100	100	100	100	100	100	100	100	100	100	100	100	100
N2	17	83	11	11		0	0.882979	88.2979				7	7	100	100	100	100	100	100	100	100	100	100	100	100	100	100	100	100	100	100	100	100
N2	19	70	24	13		0	0.744681	74.4681				10	10	100	100	100	100	100	100	100	100	100	100	100	100	100	100	100	100	100	100	100	100
N2	21	42	52	28		0	0.446809	44.6809				12	12	100	100	100	100	100	100	100	100	100	100	100	100	100	100	100	100	100	100	100	100
N2	24	16	78	26		0	0.170213	17.0213				14	14	100	100	100	100	100	100	100	100	100	100	100	100	100	100	100	100	100	100	100	100
N2	26	5	89	11		0	0.0531915	5.31915				17	17	88.2979	86.6667	90.1099	86.8132	84.8485	92.4731	86.747	87.5	79.1045	63.9344	79.1667	94.2308	86.7647	79.4872	81.25	80	86	87.0968	83.3333	65.9574
N2	30	2	92	3		0	0.0212766	2.12766				19	19	74.4681	75	70.3297	73.6264	46.9697	74.1935	69.8795	73.9583	43.2836	32.7869	75	82.6923	67.6471	61.5385	62.5	60	76	72.5806	75	40.4255
N2	32	0	94	2	0	0	0	0				21	21	44.6809	60	47.2527	56.044	25.7576	60.2151	48.1928	61.4583	26.8657	18.0328	66.6667	75	51.4706	35.8974	43.75	45	72	43.5484	66.6667	19.1489
N2	34	0	94		0	0	0	0				24	24	17.0213	41.6667	28.5714	32.967	15.1515	43.0108	20.4819	47.9167	11.9403	11.4754	56.25	69.2308	38.2353	28.2051	35.4167	32.5	64	32.2581	0	12.766
N2	37	0	94		0	0	0	0				26	26	5.31915	28.3333	15.3846	20.8791	6.06061	30.1075	8.43373	35.4167	1.49254	4.91803	41.6667	57.6923	23.5294	17.9487	20.8333	27.5	56	17.7419		4.25532
N2	39	0	94		0	0	0	0				28	28	2.12766	15	6.59341	8.79121	0	13.9785	1.20482	14.5833	0	0	31.25	46.1538	4.41176	2.5641	10.4167	12.5	38	0		0
N2	41	0	94		0	0	0	0				31	31	0	8.33333	0	0		6.45161	0	3.125			20.8333	30.7692	0	0	4.16667	10	24
N2	44	0	94		0	0	0	0				33	33		3.33333				0		0			8.33333	17.3077			0	0	14
N2	46	0	94		0	0	0	0				35	35		0									2.08333	3.84615					4
												38	38											0	1.92308					2
C9	0	60	0	0	0	0	1	100				40	40												0					0
C9	5	60	0	0	0	0	1	100				42	42
C9	7	60	0	0	0	0	1	100				45	45
C9	10	60			0	0	1	100
C9	12	60				0	1	100
C9	14	60				0	1	100
C9	17	52	8	8		0	0.866667	86.6667
C9	19	45	15	7		0	0.75	75
C9	21	36	24	9		0	0.6	60
C9	24	25	35	11		0	0.416667	41.6667
C9	26	17	43	8		0	0.283333	28.3333
C9	28	9	51	8		0	0.15	15
C9	32	5	55	4		0	0.0833333	8.33333
C9	34	2	58	3		0	0.0333333	3.33333
C9	37	0	60	2		0	0	0
C9	39	0	60			0	0	0
C9	41	0	60			0	0	0
C9	44	0	60			0	0	0
C9	46	0	60			0	0	0
fmo-2	0	91	0	0	0	0	1	100
fmo-2	5	91	0	0	0	0	1	100
fmo-2	7	91	0	0	0	0	1	100
fmo-2	10	91			0	0	1	100
fmo-2	12	91				0	1	100
fmo-2	14	91				0	1	100
fmo-2	17	82	9	9		0	0.901099	90.1099
fmo-2	19	64	27	18		0	0.703297	70.3297
fmo-2	21	43	48	21		0	0.472527	47.2527
fmo-2	24	26	65	17		0	0.285714	28.5714
fmo-2	26	14	77	12		0	0.153846	15.3846
fmo-2	28	6	85	8		0	0.0659341	6.59341
fmo-2	32	0	91	6		0	0	0
fmo-2	34	0	91		0	0	0	0
fmo-2	37	0	91		0	0	0	0
fmo-2	39	0	91		0	0	0	0
fmo-2	41	0	91		0	0	0	0
fmo-2	44	0	91		0	0	0	0
fmo-2	46	0	91		0	0	0	0
1KO	0	91	0	0	0	0	1	100
1KO	5	91	0	0	0	0	1	100
1KO	7	91	0	0	0	0	1	100
1KO	10	91	0	0	0	0	1	100
1KO	12	91			0	0	1	100
1KO	14	91			0	0	1	100
1KO	17	79	12	12	0	0	0.868132	86.8132
1KO	19	67	24	12	0	0	0.736264	73.6264
1KO	21	51	40	16	0	0	0.56044	56.044
1KO	24	30	61	21	0	0	0.32967	32.967
1KO	26	19	72	11	0	0	0.208791	20.8791
1KO	28	8	83	11	0	0	0.0879121	8.79121
1KO	32	0	91	8	0	0	0	0
1KO	34	0	91		0	0	0	0
1KO	37	0	91		0	0	0	0
1KO	39	0	91		0	0	0	0
1KO	41	0	91		0	0	0	0
1KO	44	0	91		0	0	0	0
1KO	46	0	91		0	0	0	0
4KO	0	66	0	0	0	0	1	100
4KO	5	66	0	0	0	0	1	100
4KO	7	66	0	0	0	0	1	100
4KO	10	66	0	0	0	0	1	100
4KO	12	66			0	0	1	100
4KO	14	66			0	0	1	100
4KO	17	56	10	10	0	0	0.848485	84.8485
4KO	19	36	30	20		0	0.545455	54.5455
4KO	21	22	44	14	0	0	0.333333	33.3333
4KO	24	15	51	7	0	0	0.227273	22.7273
4KO	26	7	59	8	0	0	0.106061	10.6061
4KO	28	0	66	7	0	0	0	0
4KO	32	0	66		0	0	0	0
4KO	34	0	66		0	0	0	0
4KO	37	0	66		0	0	0	0
4KO	39	0	66		0	0	0	0
4KO	41	0	66		0	0	0	0
4KO	44	0	66		0	0	0	0
4KO	46	0	66	0	0	0	0	0
4OE	0	93	0	0	0	0	1	100
4OE	5	93	0	0	0	0	1	100
4OE	7	93	0	0	0	0	1	100
4OE	10	93	0	0	0	0	1	100							fmo1 is not required for sDR
4OE	12	93			0	0	1	100							fmo1 is downstream of fmo2 under fed conditions
4OE	14	93				0	1	100							could the sdr be a substrate epistasis? So takes on the 2OE phenotype?
4OE	17	86	7	7	0	0	0.924731	92.4731
4OE	19	69	24	17		0	0.741935	74.1935
4OE	21	56	37	13	0	0	0.602151	60.2151
4OE	24	40	53	16	0	0	0.430108	43.0108
4OE	26	28	65	12	0	0	0.301075	30.1075
4OE	28	13	80	15	0	0	0.139785	13.9785
4OE	32	6	87	7	0	0	0.0645161	6.45161
4OE	34	0	93	6	0	0	0	0
4OE	37	0	93		0	0	0	0
4OE	39	0	93		0	0	0	0
4OE	41	0	93		0	0	0	0
4OE	44	0	93		0	0	0	0
4OE	46	0	93		0	0	0	0
2O;1KO	0	83	0	0	0	0	1	100
2O;1KO	5	83	0	0	0	0	1	100
2O;1KO	7	83	0	0	0	0	1	100
2O;1KO	10	83	0	0	0	0	1	100
2O;1KO	12	83				0	1	100
2O;1KO	14	83				0	1	100
2O;1KO	17	72	11	11		0	0.86747	86.747
2O;1KO	19	58	25	14	0	0	0.698795	69.8795
2O;1KO	21	40	43	18	0	0	0.481928	48.1928
2O;1KO	24	17	66	23	0	0	0.204819	20.4819
2O;1KO	26	7	76	10	0	0	0.0843373	8.43373
2O;1KO	28	1	82	6	0	0	0.0120482	1.20482
2O;1KO	32	0	83	1	0	0	0	0
2O;1KO	34	0	83		0	0	0	0
2O;1KO	37	0	83		0	0	0	0
2O;1KO	39	0	83		0	0	0	0
2O;1KO	41	0	83		0	0	0	0
2O;1KO	44	0	83		0	0	0	0
2O;1KO	46	0	83		0	0	0	0
2O;4O	0	96	0	0	0	0	1	100
2O;4O	5	96	0	0	0	0	1	100
2O;4O	7	96	0	0	0	0	1	100
2O;4O	10	96	0	0	0	0	1	100
2O;4O	12	96				0	1	100																								sdr is additive with 2o;4o
2O;4O	14	96				0	1	100
2O;4O	17	84	12	12	0	0	0.875	87.5
2O;4O	19	71	25	13	0	0	0.739583	73.9583
2O;4O	21	59	37	12	0	0	0.614583	61.4583
2O;4O	24	46	50	13	0	0	0.479167	47.9167
2O;4O	26	34	62	12	0	0	0.354167	35.4167
2O;4O	28	14	82	20	0	0	0.145833	14.5833
2O;4O	32	3	93	11	0	0	0.03125	3.125
2O;4O	34	0	96	3	0	0	0	0
2O;4O	37	0	96	0	0	0	0	0
2O;4O	39	0	96	0	0	0	0	0
2O;4O	41	0	96	0	0	0	0	0
2O;4O	44	0	96	0	0	0	0	0
	46
2O;4KO	0	67	0	0	0	0	1	100
2O;4KO	5	67	0	0	0	0	1	100
2O;4KO	7	67	0	0	0	0	1	100
2O;4KO	10	67	0	0	0	0	1	100
2O;4KO	12	67				0	1	100
2O;4KO	14	67				0	1	100
2O;4KO	17	53	14	14		0	0.791045	79.1045
2O;4KO	19	29	38	24		0	0.432836	43.2836
2O;4KO	21	18	49	11		0	0.268657	26.8657
2O;4KO	24	8	59	10		0	0.119403	11.9403
2O;4KO	26	1	66	7		0	0.0149254	1.49254
2O;4KO	28	0	67	1	0	0	0	0
2O;4KO	32	0	67		0	0	0	0
2O;4KO	34	0	67		0	0	0	0
2O;4KO	37	0	67		0	0	0	0
2O;4KO	39	0	67		0	0	0	0
2O;4KO	41	0	67		0	0	0	0
2O;4KO	44	0	67		0	0	0	0
2O;4KO	46	0	67		0		0	0
2O;4KO	47	0	67		0		0	0
2K;4K	0	61	0	0	0	0	1	100
2K;4K	5	61	0	0	0	0	1	100
2K;4K	7	61	0	0	0	0	1	100
2K;4K	10	61	0	0	0	0	1	100
2K;4K	12	61			0	0	1	100
2K;4K	14	61			0	0	1	100
2K;4K	17	39	22	22	0	0	0.639344	63.9344
2K;4K	19	20	41	19		0	0.327869	32.7869
2K;4K	21	11	50	9		0	0.180328	18.0328
2K;4K	24	7	54	4		0	0.114754	11.4754
2K;4K	26	3	58	4		0	0.0491803	4.91803
2K;4K	29	0	61	3		0	0	0
2K;4K	31	0	61			0	0	0
2K;4K	33	0	61			0	0	0
2K;4K	35	0	61			0	0	0
2K;4K	38	0	61			0	0	0
2K;4K	40	0	61			0	0	0
2K;4K		0	61		0	0	0	0
							0
14	14	0	0	0	0	0	#DIV/0!	#DIV/0!
14	17	0	0	0	0	0	#DIV/0!	#DIV/0!
14	19	-1	1	1	0	0	#DIV/0!	#DIV/0!
14	21	-5	5	2	2	0	#DIV/0!	#DIV/0!
14	24	-19	19	12	2	0	#DIV/0!	#DIV/0!
14	26	-31	31	11	1	0	#DIV/0!	#DIV/0!
14	29	-82	82	50	1	0	#DIV/0!	#DIV/0!
14	31	-92	92	10	0	0	#DIV/0!	#DIV/0!
14	33	-97	97	5	0	0	#DIV/0!	#DIV/0!
14	35	-97	97	0	0	0	#DIV/0!	#DIV/0!
14	38	-97	97	0	0	0	#DIV/0!	#DIV/0!
14	40	-97	97	0	0	0	#DIV/0!	#DIV/0!
14		-97	97	0	0	0	#DIV/0!	#DIV/0!
15L	0	156	0	0	0	0	1	100
15	5	156	0	0	0	0	1	100
15	7	156	0	0	0	0	1	100
15	10	156	0	0	0	0	1	100
15	12	153	3	3	0	0	0.980769	98.0769
15	14	153	3	0	0	0	0.980769	98.0769
15	17	151	5	2	0	0	0.967949	96.7949
15	19	151	5	0	0	0	0.967949	96.7949
15	21	143	13	4	4	0	0.916667	91.6667
15	24	120	36	18	5	0	0.769231	76.9231
15	26	99	57	18	3	0	0.634615	63.4615
15	29	18	138	81	0	0	0.115385	11.5385
15	31	4	152	14	0	0	0.025641	2.5641
15	33	0	156	4	0	0	0	0
15	35	0	156	0	0	0	0	0
15	38	0	156	0	0	0	0	0
15	40	0	156	0	0	0	0	0
15		0	156	0	0	0	0	0
16	0	156	0	0	0	0	1	100
16	5	156	0	0	0	0	1	100
16	7	156	0	0	0	0	1	100
16	10	156	0	0	0	0	1	100
16	12	154	2	2	0	0	0.987179	98.7179
16	14	154	2	0	0	0	0.987179	98.7179
16	17	154	2	0	0	0	0.987179	98.7179
16	19	148	8	4	2	0	0.948718	94.8718
16	21	136	20	4	8	0	0.871795	87.1795
16	24	98	58	10	28	0	0.628205	62.8205
16	26	79	77	11	8	0	0.50641	50.641
16	29	27	129	52	0	0	0.173077	17.3077
16	31	18	138	9	0	0	0.115385	11.5385
16	33	7	149	11	0	0	0.0448718	4.48718
16	35	2	154	5	0	0	0.0128205	1.28205
16	38	1	155	1	0	0	0.00641026	0.641026
16	40	1	155	0	0	0	0.00641026	0.641026
16	42	0	156	1	0	0	0	0
17	0	134	0	0	0	0	1	100
17	5	134	0	0	0	0	1	100
17	7	134	0	0	0	0	1	100
17	10	134	0	0	0	0	1	100
17	12	132	2	2	0	0	0.985075	98.5075
17	14	132	2	0	0	0	0.985075	98.5075
17	17	132	2	0	0	0	0.985075	98.5075
17	19	124	10	4	4	0	0.925373	92.5373
17	21	109	25	5	10	0	0.813433	81.3433
17	24	90	44	10	9	0	0.671642	67.1642
17	26	70	64	15	5	0	0.522388	52.2388
17	29	34	100	36	0	0	0.253731	25.3731
17	31	23	111	11	0	0	0.171642	17.1642
17	33	3	131	20	0	0	0.0223881	2.23881
17	35	1	133	2	0	0	0.00746269	0.746269
17	38	1	133	0	0	0	0.00746269	0.746269
17	40	0	134	1	0	0	0	0
17		0	134	0	0	0	0	0
18	0	233	0	0	0	0	1	100
18	5	233	0	0	0	0	1	100
18	7	233	0	0	0	0	1	100
18	10	233	0	0	0	0	1	100
18	12	233	0	0	0	0	1	100
18	14	232	1	1	0	0	0.995708	99.5708
18	17	221	12	10	1	0	0.948498	94.8498
18	19	219	14	1	1	0	0.939914	93.9914
18	21	212	21	3	4	0	0.909871	90.9871
18	24	180	53	24	8	0	0.772532	77.2532
18	26	136	97	39	5	0	0.583691	58.3691
18	29	72	161	62	2	0	0.309013	30.9013
18	31	59	174	13	0	0	0.253219	25.3219
18	33	36	197	23	0	0	0.154506	15.4506
18	35	27	206	9	0	0	0.11588	11.588
18	38	15	218	12	0	0	0.0643777	6.43777
18	40	7	226	8	0	0	0.0300429	3.00429
18	42	7	226	0	0	0	0.0300429	3.00429
18	45	0	233	7	0	0	0	0
19	0	142	0	0	0	0	1	100
19	5	142	0	0	0	0	1	100
19	7	142	0	0	0	0	1	100
19	10	142	0	0	0	0	1	100
19	12	140	2	2	0	0	0.985915	98.5915
19	14	137	5	2	1	0	0.964789	96.4789
19	17	128	14	7	2	0	0.901408	90.1408
19	19	121	21	0	7	0	0.852113	85.2113
19	21	115	27	3	3	0	0.809859	80.9859
19	24	81	61	21	13	0	0.570423	57.0423
19	26	48	94	26	7	0	0.338028	33.8028
19	29	21	121	27	0	0	0.147887	14.7887
19	31	11	131	10	0	0	0.0774648	7.74648
19	33	2	140	9	0	0	0.0140845	1.40845
19	35	1	141	1	0	0	0.00704225	0.704225
19	38	0	142	1	0	0	0	0
19	40	0	142	0	0	0	0	0
19		0	142	0	0	0	0	0
20	0	227	0	0	0	0	1	100
20	5	227	0	0	0	0	1	100
20	7	227	0	0	0	0	1	100
20	10	227	0	0	0	0	1	100
20	12	224	3	3	0	0	0.986784	98.6784
20	14	224	3	0	0	0	0.986784	98.6784
20	17	214	13	8	2	0	0.942731	94.2731
20	19	202	25	5	7	0	0.889868	88.9868
20	21	180	47	10	12	0	0.792952	79.2952
20	24	116	111	31	33	0	0.511013	51.1013
20	26	86	141	26	4	0	0.378855	37.8855
20	29	21	206	59	6	0	0.092511	9.2511
20	31	7	220	14	0	0	0.030837	3.0837
20	33	1	226	6	0	0	0.00440529	0.440529
20	35	0	227	1	0	0	0	0
20	38	0	227	0	0	0	0	0
20	40	0	227	0	0	0	0	0
20		0	227	0	0	0	0	0
21	0	154	0	0	0	0	1	100
21	5	154	0	0	0	0	1	100
21	7	154	0	0	0	0	1	100
21	10	154	0	0	0	0	1	100
21	12	154	0	0	0	0	1	100
21	14	154	0	0	0	0	1	100
21	17	154	0	0	0	0	1	100
21	19	146	8	7	1	0	0.948052	94.8052
21	21	127	27	4	15	0	0.824675	82.4675
21	24	106	48	17	4	0	0.688312	68.8312
21	26	68	86	31	7	0	0.441558	44.1558
21	29	38	116	29	1	0	0.246753	24.6753
21	31	29	125	9	0	0	0.188312	18.8312
21	33	11	143	18	0	0	0.0714286	7.14286
21	35	5	149	6	0	0	0.0324675	3.24675
21	38	0	154	5	0	0	0	0
21	40	0	154	0	0	0	0	0
21		0	154	0	0	0	0	0

## Sheet: Sheet2
% WT [94]
#days	dead	censored
0	0
5	0
7	0
10	0
12	0
14	0
17	11
19	13
21	28
24	26
26	11
28	3
32	2
34
37
39
41
% fmo-2 OE [60]
#days	dead	censored
0	0
5	0
7	0
10	0
12	0
14	0
17	8
19	7
21	9
24	11
26	8
28	8
32	4
34	3
37	2
39
41
% fmo-4 OE [93]
#days	dead	censored
0	0
5	0
7	0
10	0
12	0
14	0
17	7
19	17
21	13
24	16
26	12
28	15
32	7
34	6
37
39
41
% fmo-4 KO [66]
#days	dead	censored
0	0
5	0
7	0
10	0
12	0
14	0
17	10
19	20
21	14
24	7
26	8
28	7
32
34
37
39
41
% fmo-2O;4O [67]
#days	dead	censored
0	0
5	0
7	0
10	0
12	0
14	0
17	14
19	24
21	11
24	10
26	7
28	1
32
34
37
39
41
% fmo-2O;4K [95]
#days	dead	censored
0	0
5	0
7	0
10	0
12	7
14	7
17	10
19	10
21	15
24	24
26	16
28	5
31	0
33	1
35
38
40

## Sheet: Sheet3
condition	chi	pvalue	corrected_pvalue
WT v.s. fmo-2 OE	12.1	0.0005	0.0025
WT v.s. fmo-4 OE	15.94	0.0001	0.0003
WT v.s. fmo-4 KO	0.52	0.4704	1
WT v.s. fmo-2O;4O	8.44	0.0037	0.0183
WT v.s. fmo-2O;4K	0	0.9928	1
fmo-2 OE v.s. WT	12.1	0.0005	0.0025
fmo-2 OE v.s. fmo-4 OE	0.05	0.8173	1
fmo-2 OE v.s. fmo-4 KO	11.71	0.0006	0.0031
fmo-2 OE v.s. fmo-2O;4O	23.56	1.2e-06	6.1e-06
fmo-2 OE v.s. fmo-2O;4K	12.73	0.0004	0.0018
fmo-4 OE v.s. WT	15.94	0.0001	0.0003
fmo-4 OE v.s. fmo-2 OE	0.05	0.8173	1
fmo-4 OE v.s. fmo-4 KO	15.92	0.0001	0.0003
fmo-4 OE v.s. fmo-2O;4O	32.05	1.5e-08	7.5e-08
fmo-4 OE v.s. fmo-2O;4K	17.35	3.1e-05	0.0002
fmo-4 KO v.s. WT	0.52	0.4704	1
fmo-4 KO v.s. fmo-2 OE	11.71	0.0006	0.0031
fmo-4 KO v.s. fmo-4 OE	15.92	0.0001	0.0003
fmo-4 KO v.s. fmo-2O;4O	3.77	0.0523	0.2613
fmo-4 KO v.s. fmo-2O;4K	0.04	0.8485	1
fmo-2O;4O v.s. WT	8.44	0.0037	0.0183
fmo-2O;4O v.s. fmo-2 OE	23.56	1.2e-06	6.1e-06
fmo-2O;4O v.s. fmo-4 OE	32.05	1.5e-08	7.5e-08
fmo-2O;4O v.s. fmo-4 KO	3.77	0.0523	0.2613
fmo-2O;4O v.s. fmo-2O;4K	5.04	0.0248	0.1242
fmo-2O;4K v.s. WT	0	0.9928	1
fmo-2O;4K v.s. fmo-2 OE	12.73	0.0004	0.0018
fmo-2O;4K v.s. fmo-4 OE	17.35	3.1e-05	0.0002
fmo-2O;4K v.s. fmo-4 KO	0.04	0.8485	1
fmo-2O;4K v.s. fmo-2O;4O	5.04	0.0248	0.1242

## Sheet: fed
strain	day	alive	dead-total	dead-normal	dead-ruptured	censored	ratio-alive	percentage-alive
N2	0	110	0	0	0	0	1	100
N2	5	110	0	0	0	0	1	100
N2	7	110	0	0	0	0	1	100						1	2	3	4	5	6	7				sDR
N2	10	110	0	0	0	0	1	100			plot data here-->		day	WT	fmo-2 OE	fmo-2	fmo-1	fmo-4	fmo-4 OE	fmo-2O;1K	fmo-2O;4O	fmo-2O;4K	fmo-2K;4K	WT	fmo-2 OE	fmo-2	fmo-1	fmo-4	fmo-4 OE	fmo-2O;4O	fmo-2O;4K	fmo-2O;1K	fmo-2K;4K
N2	12	106	4	4	0	0	0.963636	96.3636				0	0	100	100	100	100	100	100	100	100	100	100	100	100	100	100	100	100	100	100	100	100
N2	14	101	9	5		0	0.918182	91.8182				5	5	100	100	100	100	100	100	100	100	100	100	100	100	100	100	100	100	100	100	100	100
N2	17	90	20	11		0	0.818182	81.8182				7	7	100	100	100	100	100	100	100	100	100	100	100	100	100	100	100	100	100	100	100	100
N2	19	77	33	13		0	0.7	70				10	10	100	100	100	100	100	100	100	100	100	100	100	100	100	100	100	100	100	100	100	100
N2	21	49	61	28		0	0.445455	44.5455				12	12	96.3636	96.0526	95.7447	95.7895	93.0556	97.6471	96.6667	97.619	91.25	88	93.4211	92.6471	96.6292	91.2281	91.9355	91.3043	95	93.5065	91.6667	88.7324
N2	24	23	87	26		0	0.209091	20.9091				14	14	91.8182	94.7368	93.617	90.5263	86.1111	92.9412	91.1111	92.8571	86.25	80	88.1579	88.2353	95.5056	82.4561	85.4839	84.7826	88.3333	88.3117	83.3333	80.2817
N2	26	12	98	11		0	0.109091	10.9091				17	17	81.8182	84.2105	84.0426	77.8947	72.2222	84.7059	78.8889	82.1429	68.75	50.6667	64.4737	83.8235	85.3933	68.4211	70.9677	67.3913	76.6667	77.9221	66.6667	57.7465
N2	30	12	98			0	0.109091	10.9091				19	19	70	75	64.8936	65.2632	37.5	64.7059	63.3333	67.8571	38.75	25.3333	61.8421	75	70.7865	56.1404	53.2258	50	68.3333	66.2338	58.3333	40.8451
N2	32	12	98		0	0	0.109091	10.9091				21	21	44.5455	63.1579	42.5532	48.4211	18.0556	49.4118	43.3333	55.9524	25	13.3333	56.5789	69.1176	58.427	38.5965	38.7097	36.9565	65	42.8571	0	26.7606
N2	34	12	98		0	0	0.109091	10.9091				24	24	20.9091	48.6842	24.4681	26.3158	8.33333	30.5882	17.7778	42.8571	12.5	8	51.3158	64.7059	48.3146	33.3333	32.2581	26.087	58.3333	33.7662		22.5352
N2	37	12	98		0	0	0.109091	10.9091				26	26	10.9091	38.1579	11.7021	14.7368	0	16.4706	6.66667	32.1429	3.75	2.66667	43.4211	55.8824	37.0787	26.3158	20.9677	21.7391	51.6667	22.0779		16.9014
N2	39	12	98		0	0	0.109091	10.9091				28	28
N2	41	12	98		0	0	0.109091	10.9091				31	31
N2	44	12	98		0	0	0.109091	10.9091				33	33
N2	46	12	98		0	0	0.109091	10.9091				35	35
												38	38
C9	0	76	0	0	0	0	1	100				40	40
C9	5	76	0	0	0	0	1	100				42	42
C9	7	76	0	0	0	0	1	100				45	45
C9	10	76	0	0	0	0	1	100
C9	12	73	3	3		0	0.960526	96.0526
C9	14	72	4	1		0	0.947368	94.7368
C9	17	64	12	8		0	0.842105	84.2105
C9	19	57	19	7		0	0.75	75
C9	21	48	28	9		0	0.631579	63.1579
C9	24	37	39	11		0	0.486842	48.6842
C9	26	29	47	8		0	0.381579	38.1579
C9	28	29	47			0	0.381579	38.1579
C9	32	29	47			0	0.381579	38.1579
C9	34	29	47			0	0.381579	38.1579
C9	37	29	47			0	0.381579	38.1579
C9	39	29	47			0	0.381579	38.1579
C9	41	29	47			0	0.381579	38.1579
C9	44	29	47			0	0.381579	38.1579
C9	46	29	47			0	0.381579	38.1579
fmo-2	0	94	0	0	0	0	1	100
fmo-2	5	94	0	0	0	0	1	100
fmo-2	7	94	0	0	0	0	1	100
fmo-2	10	94	0	0	0	0	1	100
fmo-2	12	90	4	4		0	0.957447	95.7447
fmo-2	14	88	6	2		0	0.93617	93.617
fmo-2	17	79	15	9		0	0.840426	84.0426
fmo-2	19	61	33	18		0	0.648936	64.8936
fmo-2	21	40	54	21		0	0.425532	42.5532
fmo-2	24	23	71	17		0	0.244681	24.4681
fmo-2	26	11	83	12		0	0.117021	11.7021
fmo-2	28	11	83			0	0.117021	11.7021
fmo-2	32	11	83			0	0.117021	11.7021
fmo-2	34	11	83		0	0	0.117021	11.7021
fmo-2	37	11	83		0	0	0.117021	11.7021
fmo-2	39	11	83		0	0	0.117021	11.7021
fmo-2	41	11	83		0	0	0.117021	11.7021
fmo-2	44	11	83		0	0	0.117021	11.7021
fmo-2	46	11	83		0	0	0.117021	11.7021
1KO	0	95	0	0	0	0	1	100
1KO	5	95	0	0	0	0	1	100
1KO	7	95	0	0	0	0	1	100
1KO	10	95	0	0	0	0	1	100
1KO	12	91	4	4	0	0	0.957895	95.7895
1KO	14	86	9	5	0	0	0.905263	90.5263
1KO	17	74	21	12	0	0	0.778947	77.8947
1KO	19	62	33	12	0	0	0.652632	65.2632
1KO	21	46	49	16	0	0	0.484211	48.4211
1KO	24	25	70	21	0	0	0.263158	26.3158
1KO	26	14	81	11	0	0	0.147368	14.7368
1KO	28	14	81		0	0	0.147368	14.7368
1KO	32	14	81		0	0	0.147368	14.7368
1KO	34	14	81		0	0	0.147368	14.7368
1KO	37	14	81		0	0	0.147368	14.7368
1KO	39	14	81		0	0	0.147368	14.7368
1KO	41	14	81		0	0	0.147368	14.7368
1KO	44	14	81		0	0	0.147368	14.7368
1KO	46	14	81		0	0	0.147368	14.7368
4KO	0	72	0	0	0	0	1	100
4KO	5	72	0	0	0	0	1	100
4KO	7	72	0	0	0	0	1	100
4KO	10	72	0	0	0	0	1	100
4KO	12	67	5	5	0	0	0.930556	93.0556
4KO	14	62	10	5	0	0	0.861111	86.1111
4KO	17	52	20	10	0	0	0.722222	72.2222
4KO	19	27	45	25		0	0.375	37.5
4KO	21	13	59	14	0	0	0.180556	18.0556
4KO	24	6	66	7	0	0	0.0833333	8.33333
4KO	26	0	72	6	0	0	0	0
4KO	28	0	72		0	0	0	0
4KO	32	0	72		0	0	0	0
4KO	34	0	72		0	0	0	0
4KO	37	0	72		0	0	0	0
4KO	39	0	72		0	0	0	0
4KO	41	0	72		0	0	0	0
4KO	44	0	72		0	0	0	0
4KO	46	0	72	0	0	0	0	0
4OE	0	85	0	0	0	0	1	100
4OE	5	85	0	0	0	0	1	100
4OE	7	85	0	0	0	0	1	100
4OE	10	85	0	0	0	0	1	100							fmo1 is not required for sDR
4OE	12	83	2	2	0	0	0.976471	97.6471							fmo1 is downstream of fmo2 under fed conditions
4OE	14	79	6	4		0	0.929412	92.9412							could the sdr be a substrate epistasis? So takes on the 2OE phenotype?
4OE	17	72	13	7	0	0	0.847059	84.7059
4OE	19	55	30	17		0	0.647059	64.7059
4OE	21	42	43	13	0	0	0.494118	49.4118
4OE	24	26	59	16	0	0	0.305882	30.5882
4OE	26	14	71	12	0	0	0.164706	16.4706
4OE	28	14	71		0	0	0.164706	16.4706
4OE	32	14	71		0	0	0.164706	16.4706
4OE	34	14	71		0	0	0.164706	16.4706
4OE	37	14	71		0	0	0.164706	16.4706
4OE	39	14	71		0	0	0.164706	16.4706
4OE	41	14	71		0	0	0.164706	16.4706
4OE	44	14	71		0	0	0.164706	16.4706
4OE	46	14	71		0	0	0.164706	16.4706
2O;1KO	0	90	0	0	0	0	1	100
2O;1KO	5	90	0	0	0	0	1	100
2O;1KO	7	90	0	0	0	0	1	100
2O;1KO	10	90	0	0	0	0	1	100
2O;1KO	12	87	3	3		0	0.966667	96.6667
2O;1KO	14	82	8	5		0	0.911111	91.1111
2O;1KO	17	71	19	11		0	0.788889	78.8889
2O;1KO	19	57	33	14	0	0	0.633333	63.3333
2O;1KO	21	39	51	18	0	0	0.433333	43.3333
2O;1KO	24	16	74	23	0	0	0.177778	17.7778
2O;1KO	26	6	84	10	0	0	0.0666667	6.66667
2O;1KO	28	6	84		0	0	0.0666667	6.66667
2O;1KO	32	6	84		0	0	0.0666667	6.66667
2O;1KO	34	6	84		0	0	0.0666667	6.66667
2O;1KO	37	6	84		0	0	0.0666667	6.66667
2O;1KO	39	6	84		0	0	0.0666667	6.66667
2O;1KO	41	6	84		0	0	0.0666667	6.66667
2O;1KO	44	6	84		0	0	0.0666667	6.66667
2O;1KO	46	6	84		0	0	0.0666667	6.66667
2O;4O	0	84	0	0	0	0	1	100
2O;4O	5	84	0	0	0	0	1	100																																			fmo4 is downstream of fmo2, and fmo4 is required for sDR.
2O;4O	7	84	0	0	0	0	1	100
2O;4O	10	84	0	0	0	0	1	100
2O;4O	12	82	2	2		0	0.97619	97.619																								sdr is additive with 2o;4o
2O;4O	14	78	6	4		0	0.928571	92.8571
2O;4O	17	69	15	9	0	0	0.821429	82.1429
2O;4O	19	57	27	12	0	0	0.678571	67.8571
2O;4O	21	47	37	10	0	0	0.559524	55.9524
2O;4O	24	36	48	11	0	0	0.428571	42.8571
2O;4O	26	27	57	9	0	0	0.321429	32.1429
2O;4O	28	27	57		0	0	0.321429	32.1429
2O;4O	32	27	57		0	0	0.321429	32.1429
2O;4O	34	27	57		0	0	0.321429	32.1429
2O;4O	37	27	57	0	0	0	0.321429	32.1429
2O;4O	39	27	57	0	0	0	0.321429	32.1429
2O;4O	41	27	57	0	0	0	0.321429	32.1429
2O;4O	44	27	57	0	0	0	0.321429	32.1429
	46
2O;4KO	0	80	0	0	0	0	1	100
2O;4KO	5	80	0	0	0	0	1	100
2O;4KO	7	80	0	0	0	0	1	100
2O;4KO	10	80	0	0	0	0	1	100
2O;4KO	12	73	7	7		0	0.9125	91.25
2O;4KO	14	69	11	4		0	0.8625	86.25
2O;4KO	17	55	25	14		0	0.6875	68.75
2O;4KO	19	31	49	24		0	0.3875	38.75
2O;4KO	21	20	60	11		0	0.25	25
2O;4KO	24	10	70	10		0	0.125	12.5
2O;4KO	26	3	77	7		0	0.0375	3.75
2O;4KO	28	3	77		0	0	0.0375	3.75
2O;4KO	32	3	77		0	0	0.0375	3.75
2O;4KO	34	3	77		0	0	0.0375	3.75
2O;4KO	37	3	77		0	0	0.0375	3.75
2O;4KO	39	3	77		0	0	0.0375	3.75
2O;4KO	41	3	77		0	0	0.0375	3.75
2O;4KO	44	3	77		0	0	0.0375	3.75
2O;4KO	46	3	77		0		0.0375	3.75
2O;4KO	47	3	77		0		0.0375	3.75
2K;4K	0	75	0	0	0	0	1	100
2K;4K	5	75	0	0	0	0	1	100
2K;4K	7	75	0	0	0	0	1	100
2K;4K	10	75	0	0	0	0	1	100
2K;4K	12	66	9	9	0	0	0.88	88
2K;4K	14	60	15	6	0	0	0.8	80
2K;4K	17	38	37	22	0	0	0.506667	50.6667
2K;4K	19	19	56	19		0	0.253333	25.3333
2K;4K	21	10	65	9		0	0.133333	13.3333
2K;4K	24	6	69	4		0	0.08	8
2K;4K	26	2	73	4		0	0.0266667	2.66667
2K;4K	29	2	73			0	0.0266667	2.66667
2K;4K	31	2	73			0	0.0266667	2.66667
2K;4K	33	2	73			0	0.0266667	2.66667
2K;4K	35	2	73			0	0.0266667	2.66667
2K;4K	38	2	73			0	0.0266667	2.66667
2K;4K	40	2	73			0	0.0266667	2.66667
2K;4K		2	73		0	0	0.0266667	2.66667
							0
14	14	0	0	0	0	0	#DIV/0!	#DIV/0!
14	17	0	0	0	0	0	#DIV/0!	#DIV/0!
14	19	-1	1	1	0	0	#DIV/0!	#DIV/0!
14	21	-5	5	2	2	0	#DIV/0!	#DIV/0!
14	24	-19	19	12	2	0	#DIV/0!	#DIV/0!
14	26	-31	31	11	1	0	#DIV/0!	#DIV/0!
14	29	-82	82	50	1	0	#DIV/0!	#DIV/0!
14	31	-92	92	10	0	0	#DIV/0!	#DIV/0!
14	33	-97	97	5	0	0	#DIV/0!	#DIV/0!
14	35	-97	97	0	0	0	#DIV/0!	#DIV/0!
14	38	-97	97	0	0	0	#DIV/0!	#DIV/0!
14	40	-97	97	0	0	0	#DIV/0!	#DIV/0!
14		-97	97	0	0	0	#DIV/0!	#DIV/0!
15L	0	156	0	0	0	0	1	100
15	5	156	0	0	0	0	1	100
15	7	156	0	0	0	0	1	100
15	10	156	0	0	0	0	1	100
15	12	153	3	3	0	0	0.980769	98.0769
15	14	153	3	0	0	0	0.980769	98.0769
15	17	151	5	2	0	0	0.967949	96.7949
15	19	151	5	0	0	0	0.967949	96.7949
15	21	143	13	4	4	0	0.916667	91.6667
15	24	120	36	18	5	0	0.769231	76.9231
15	26	99	57	18	3	0	0.634615	63.4615
15	29	18	138	81	0	0	0.115385	11.5385
15	31	4	152	14	0	0	0.025641	2.5641
15	33	0	156	4	0	0	0	0
15	35	0	156	0	0	0	0	0
15	38	0	156	0	0	0	0	0
15	40	0	156	0	0	0	0	0
15		0	156	0	0	0	0	0
16	0	156	0	0	0	0	1	100
16	5	156	0	0	0	0	1	100
16	7	156	0	0	0	0	1	100
16	10	156	0	0	0	0	1	100
16	12	154	2	2	0	0	0.987179	98.7179
16	14	154	2	0	0	0	0.987179	98.7179
16	17	154	2	0	0	0	0.987179	98.7179
16	19	148	8	4	2	0	0.948718	94.8718
16	21	136	20	4	8	0	0.871795	87.1795
16	24	98	58	10	28	0	0.628205	62.8205
16	26	79	77	11	8	0	0.50641	50.641
16	29	27	129	52	0	0	0.173077	17.3077
16	31	18	138	9	0	0	0.115385	11.5385
16	33	7	149	11	0	0	0.0448718	4.48718
16	35	2	154	5	0	0	0.0128205	1.28205
16	38	1	155	1	0	0	0.00641026	0.641026
16	40	1	155	0	0	0	0.00641026	0.641026
16	42	0	156	1	0	0	0	0
17	0	134	0	0	0	0	1	100
17	5	134	0	0	0	0	1	100
17	7	134	0	0	0	0	1	100
17	10	134	0	0	0	0	1	100
17	12	132	2	2	0	0	0.985075	98.5075
17	14	132	2	0	0	0	0.985075	98.5075
17	17	132	2	0	0	0	0.985075	98.5075
17	19	124	10	4	4	0	0.925373	92.5373
17	21	109	25	5	10	0	0.813433	81.3433
17	24	90	44	10	9	0	0.671642	67.1642
17	26	70	64	15	5	0	0.522388	52.2388
17	29	34	100	36	0	0	0.253731	25.3731
17	31	23	111	11	0	0	0.171642	17.1642
17	33	3	131	20	0	0	0.0223881	2.23881
17	35	1	133	2	0	0	0.00746269	0.746269
17	38	1	133	0	0	0	0.00746269	0.746269
17	40	0	134	1	0	0	0	0
17		0	134	0	0	0	0	0
18	0	233	0	0	0	0	1	100
18	5	233	0	0	0	0	1	100
18	7	233	0	0	0	0	1	100
18	10	233	0	0	0	0	1	100
18	12	233	0	0	0	0	1	100
18	14	232	1	1	0	0	0.995708	99.5708
18	17	221	12	10	1	0	0.948498	94.8498
18	19	219	14	1	1	0	0.939914	93.9914
18	21	212	21	3	4	0	0.909871	90.9871
18	24	180	53	24	8	0	0.772532	77.2532
18	26	136	97	39	5	0	0.583691	58.3691
18	29	72	161	62	2	0	0.309013	30.9013
18	31	59	174	13	0	0	0.253219	25.3219
18	33	36	197	23	0	0	0.154506	15.4506
18	35	27	206	9	0	0	0.11588	11.588
18	38	15	218	12	0	0	0.0643777	6.43777
18	40	7	226	8	0	0	0.0300429	3.00429
18	42	7	226	0	0	0	0.0300429	3.00429
18	45	0	233	7	0	0	0	0
19	0	142	0	0	0	0	1	100
19	5	142	0	0	0	0	1	100
19	7	142	0	0	0	0	1	100
19	10	142	0	0	0	0	1	100
19	12	140	2	2	0	0	0.985915	98.5915
19	14	137	5	2	1	0	0.964789	96.4789
19	17	128	14	7	2	0	0.901408	90.1408
19	19	121	21	0	7	0	0.852113	85.2113
19	21	115	27	3	3	0	0.809859	80.9859
19	24	81	61	21	13	0	0.570423	57.0423
19	26	48	94	26	7	0	0.338028	33.8028
19	29	21	121	27	0	0	0.147887	14.7887
19	31	11	131	10	0	0	0.0774648	7.74648
19	33	2	140	9	0	0	0.0140845	1.40845
19	35	1	141	1	0	0	0.00704225	0.704225
19	38	0	142	1	0	0	0	0
19	40	0	142	0	0	0	0	0
19		0	142	0	0	0	0	0
20	0	227	0	0	0	0	1	100
20	5	227	0	0	0	0	1	100
20	7	227	0	0	0	0	1	100
20	10	227	0	0	0	0	1	100
20	12	224	3	3	0	0	0.986784	98.6784
20	14	224	3	0	0	0	0.986784	98.6784
20	17	214	13	8	2	0	0.942731	94.2731
20	19	202	25	5	7	0	0.889868	88.9868
20	21	180	47	10	12	0	0.792952	79.2952
20	24	116	111	31	33	0	0.511013	51.1013
20	26	86	141	26	4	0	0.378855	37.8855
20	29	21	206	59	6	0	0.092511	9.2511
20	31	7	220	14	0	0	0.030837	3.0837
20	33	1	226	6	0	0	0.00440529	0.440529
20	35	0	227	1	0	0	0	0
20	38	0	227	0	0	0	0	0
20	40	0	227	0	0	0	0	0
20		0	227	0	0	0	0	0
21	0	154	0	0	0	0	1	100
21	5	154	0	0	0	0	1	100
21	7	154	0	0	0	0	1	100
21	10	154	0	0	0	0	1	100
21	12	154	0	0	0	0	1	100
21	14	154	0	0	0	0	1	100
21	17	154	0	0	0	0	1	100
21	19	146	8	7	1	0	0.948052	94.8052
21	21	127	27	4	15	0	0.824675	82.4675
21	24	106	48	17	4	0	0.688312	68.8312
21	26	68	86	31	7	0	0.441558	44.1558
21	29	38	116	29	1	0	0.246753	24.6753
21	31	29	125	9	0	0	0.188312	18.8312
21	33	11	143	18	0	0	0.0714286	7.14286
21	35	5	149	6	0	0	0.0324675	3.24675
21	38	0	154	5	0	0	0	0
21	40	0	154	0	0	0	0	0
21		0	154	0	0	0	0	0

## Sheet: IF
strain	day	alive	dead-total	dead-normal	dead-ruptured	censored	ratio-alive	percentage-alive
N2	0	76	0	0	0	0	1	100
N2	5	76	0	0	0	0	1	100
N2	7	76	0	0	0	0	1	100						1	2	3	4	5	6	7
N2	10	76	0	0	0	0	1	100			plot data here-->		day	WT	fmo-2 OE	fmo-2	fmo-1	fmo-4	fmo-4 OE	fmo-2O;4O	fmo-2O;4K	fmo-2O;1K	fmo-2K;4K
N2	12	71	5	5	0	0	0.934211	93.4211				0	0	100	100	100	100	100	100	100	100	100	100
N2	14	67	9	4		0	0.881579	88.1579				5	5	100	100	100	100	100	100	100	100	100	100
N2	17	49	27	18		0	0.644737	64.4737				7	7	100	100	100	100	100	100	100	100	100	100
N2	19	47	29	2		0	0.618421	61.8421				10	10	100	100	100	100	100	100	100	100	100	100
N2	21	43	33	4		0	0.565789	56.5789				12	12	93.4211	92.6471	96.6292	91.2281	91.9355	91.3043	95	93.5065	91.6667	88.7324
N2	24	39	37	4		0	0.513158	51.3158				14	14	88.1579	88.2353	95.5056	82.4561	85.4839	84.7826	88.3333	88.3117	83.3333	80.2817
N2	26	33	43	6		0	0.434211	43.4211				17	17	64.4737	83.8235	85.3933	68.4211	70.9677	67.3913	76.6667	77.9221	66.6667	57.7465
N2	30	33	43			0	0.434211	43.4211				19	19	61.8421	75	70.7865	56.1404	53.2258	50	68.3333	66.2338	58.3333	40.8451
N2	32	33	43		0	0	0.434211	43.4211				21	21	56.5789	69.1176	58.427	38.5965	38.7097	36.9565	65	42.8571	0	26.7606
N2	34	33	43		0	0	0.434211	43.4211				24	24	51.3158	64.7059	48.3146	33.3333	32.2581	26.087	58.3333	33.7662		22.5352
N2	37	33	43		0	0	0.434211	43.4211				26	26	43.4211	55.8824	37.0787	26.3158	20.9677	21.7391	51.6667	22.0779		16.9014
N2	39	33	43		0	0	0.434211	43.4211				28	28
N2	41	33	43		0	0	0.434211	43.4211				31	31
N2	44	33	43		0	0	0.434211	43.4211				33	33
N2	46	33	43		0	0	0.434211	43.4211				35	35
												38	38
C9	0	68	0	0	0	0	1	100				40	40
C9	5	68	0	0	0	0	1	100				42	42
C9	7	68	0	0	0	0	1	100				45	45
C9	10	68	0	0	0	0	1	100
C9	12	63	5	5		0	0.926471	92.6471
C9	14	60	8	3		0	0.882353	88.2353
C9	17	57	11	3		0	0.838235	83.8235
C9	19	51	17	6		0	0.75	75
C9	21	47	21	4		0	0.691176	69.1176
C9	24	44	24	3		0	0.647059	64.7059
C9	26	38	30	6		0	0.558824	55.8824
C9	28	38	30			0	0.558824	55.8824
C9	32	38	30			0	0.558824	55.8824
C9	34	38	30			0	0.558824	55.8824
C9	37	38	30			0	0.558824	55.8824
C9	39	38	30			0	0.558824	55.8824
C9	41	38	30			0	0.558824	55.8824
C9	44	38	30			0	0.558824	55.8824
C9	46	38	30			0	0.558824	55.8824
fmo-2	0	89	0	0	0	0	1	100
fmo-2	5	89	0	0	0	0	1	100
fmo-2	7	89	0	0	0	0	1	100
fmo-2	10	89	0	0	0	0	1	100
fmo-2	12	86	3	3		0	0.966292	96.6292
fmo-2	14	85	4	1		0	0.955056	95.5056
fmo-2	17	76	13	9		0	0.853933	85.3933
fmo-2	19	63	26	13		0	0.707865	70.7865
fmo-2	21	52	37	11		0	0.58427	58.427
fmo-2	24	43	46	9		0	0.483146	48.3146
fmo-2	26	33	56	10		0	0.370787	37.0787
fmo-2	28	33	56			0	0.370787	37.0787
fmo-2	32	33	56			0	0.370787	37.0787
fmo-2	34	33	56		0	0	0.370787	37.0787
fmo-2	37	33	56		0	0	0.370787	37.0787
fmo-2	39	33	56		0	0	0.370787	37.0787
fmo-2	41	33	56		0	0	0.370787	37.0787
fmo-2	44	33	56		0	0	0.370787	37.0787
fmo-2	46	33	56		0	0	0.370787	37.0787
1KO	0	57	0	0	0	0	1	100
1KO	5	57	0	0	0	0	1	100
1KO	7	57	0	0	0	0	1	100
1KO	10	57	0	0	0	0	1	100
1KO	12	52	5	5	0	0	0.912281	91.2281
1KO	14	47	10	5	0	0	0.824561	82.4561
1KO	17	39	18	8	0	0	0.684211	68.4211
1KO	19	32	25	7	0	0	0.561404	56.1404
1KO	21	22	35	10	0	0	0.385965	38.5965
1KO	24	19	38	3	0	0	0.333333	33.3333
1KO	26	15	42	4	0	0	0.263158	26.3158
1KO	28	15	42		0	0	0.263158	26.3158
1KO	32	15	42		0	0	0.263158	26.3158
1KO	34	15	42		0	0	0.263158	26.3158
1KO	37	15	42		0	0	0.263158	26.3158
1KO	39	15	42		0	0	0.263158	26.3158
1KO	41	15	42		0	0	0.263158	26.3158
1KO	44	15	42		0	0	0.263158	26.3158
1KO	46	15	42		0	0	0.263158	26.3158
4KO	0	62	0	0	0	0	1	100
4KO	5	62	0	0	0	0	1	100
4KO	7	62	0	0	0	0	1	100
4KO	10	62	0	0	0	0	1	100
4KO	12	57	5	5	0	0	0.919355	91.9355
4KO	14	53	9	4	0	0	0.854839	85.4839
4KO	17	44	18	9	0	0	0.709677	70.9677
4KO	19	33	29	11		0	0.532258	53.2258
4KO	21	24	38	9	0	0	0.387097	38.7097
4KO	24	20	42	4	0	0	0.322581	32.2581
4KO	26	13	49	7	0	0	0.209677	20.9677
4KO	28	13	49		0	0	0.209677	20.9677
4KO	32	13	49		0	0	0.209677	20.9677
4KO	34	13	49		0	0	0.209677	20.9677
4KO	37	13	49		0	0	0.209677	20.9677
4KO	39	13	49		0	0	0.209677	20.9677
4KO	41	13	49	0	0	0	0.209677	20.9677
4KO	44	13	49	0	0	0	0.209677	20.9677
4KO	46	13	49	0	0	0	0.209677	20.9677
4OE	0	46	0	0	0	0	1	100
4OE	5	46	0	0	0	0	1	100
4OE	7	46	0	0	0	0	1	100
4OE	10	46	0	0	0	0	1	100
4OE	12	42	4	4	0	0	0.913043	91.3043
4OE	14	39	7	3		0	0.847826	84.7826
4OE	17	31	15	8	0	0	0.673913	67.3913
4OE	19	23	23	8		0	0.5	50
4OE	21	17	29	6	0	0	0.369565	36.9565
4OE	24	12	34	5	0	0	0.26087	26.087
4OE	26	10	36	2	0	0	0.217391	21.7391
4OE	28	10	36		0	0	0.217391	21.7391
4OE	32	10	36		0	0	0.217391	21.7391
4OE	34	10	36		0	0	0.217391	21.7391
4OE	37	10	36		0	0	0.217391	21.7391
4OE	39	10	36		0	0	0.217391	21.7391
4OE	41	10	36		0	0	0.217391	21.7391
4OE	44	10	36		0	0	0.217391	21.7391
4OE	46	10	36		0	0	0.217391	21.7391
2O;4O	0	60	0	0	0	0	1	100
2O;4O	5	60	0	0	0	0	1	100
2O;4O	7	60	0	0	0	0	1	100
2O;4O	10	60	0	0	0	0	1	100
2O;4O	12	57	3	3		0	0.95	95
2O;4O	14	53	7	4		0	0.883333	88.3333
2O;4O	17	46	14	7		0	0.766667	76.6667
2O;4O	19	41	19	5	0	0	0.683333	68.3333
2O;4O	21	39	21	2	0	0	0.65	65
2O;4O	24	35	25	4	0	0	0.583333	58.3333
2O;4O	26	31	29	4	0	0	0.516667	51.6667
2O;4O	28	31	29		0	0	0.516667	51.6667
2O;4O	32	31	29		0	0	0.516667	51.6667
2O;4O	34	31	29		0	0	0.516667	51.6667
2O;4O	37	31	29		0	0	0.516667	51.6667
2O;4O	39	31	29		0	0	0.516667	51.6667
2O;4O	41	31	29		0	0	0.516667	51.6667
2O;4O	44	31	29		0	0	0.516667	51.6667
2O;4O	46	31	29		0	0	0.516667	51.6667
2O;4KO	0	77	0	0	0	0	1	100
2O;4KO	5	77	0	0	0	0	1	100
2O;4KO	7	77	0	0	0	0	1	100
2O;4KO	10	77	0	0	0	0	1	100
2O;4KO	12	72	5	5		0	0.935065	93.5065
2O;4KO	14	68	9	4		0	0.883117	88.3117
2O;4KO	17	60	17	8	0	0	0.779221	77.9221
2O;4KO	19	51	26	9	0	0	0.662338	66.2338
2O;4KO	21	33	44	18	0	0	0.428571	42.8571
2O;4KO	24	26	51	7	0	0	0.337662	33.7662
2O;4KO	26	17	60	9	0	0	0.220779	22.0779
2O;4KO	28	17	60		0	0	0.220779	22.0779
2O;4KO	32	17	60		0	0	0.220779	22.0779
2O;4KO	34	17	60		0	0	0.220779	22.0779
2O;4KO	37	17	60		0	0	0.220779	22.0779
2O;4KO	39	17	60	0	0	0	0.220779	22.0779
2O;4KO	41	17	60	0	0	0	0.220779	22.0779
2O;4KO	44	17	60	0	0	0	0.220779	22.0779
	46
2O;1KO	0	12	0	0	0	0	1	100
2O;1KO	5	12	0	0	0	0	1	100
2O;1KO	7	12	0	0	0	0	1	100
2O;1KO	10	12	0	0	0	0	1	100
2O;1KO	12	11	1	1		0	0.916667	91.6667
2O;1KO	14	10	2	1		0	0.833333	83.3333
2O;1KO	17	8	4	2		0	0.666667	66.6667
2O;1KO	19	7	5	1		0	0.583333	58.3333
2O;1KO	21	7	5			0	0.583333	58.3333
2O;1KO	24	7	5			0	0.583333	58.3333
2O;1KO	26	7	5			0	0.583333	58.3333
2O;1KO	28	7	5		0	0	0.583333	58.3333
2O;1KO	32	7	5		0	0	0.583333	58.3333
2O;1KO	34	7	5		0	0	0.583333	58.3333
2O;1KO	37	7	5		0	0	0.583333	58.3333
2O;1KO	39	7	5		0	0	0.583333	58.3333
2O;1KO	41	7	5		0	0	0.583333	58.3333
2O;1KO	44	7	5		0	0	0.583333	58.3333
2O;1KO	46	7	5		0		0.583333	58.3333
2O;1KO	47	7	5		0		0.583333	58.3333
2K;4K	0	71	0	0	0	0	1	100
2K;4K	5	71	0	0	0	0	1	100
2K;4K	7	71	0	0	0	0	1	100
2K;4K	10	71	0	0	0	0	1	100
2K;4K	12	63	8	8	0	0	0.887324	88.7324
2K;4K	14	57	14	6	0	0	0.802817	80.2817
2K;4K	17	41	30	16	0	0	0.577465	57.7465
2K;4K	19	29	42	12		0	0.408451	40.8451
2K;4K	21	19	52	10		0	0.267606	26.7606
2K;4K	24	16	55	3		0	0.225352	22.5352
2K;4K	26	12	59	4		0	0.169014	16.9014
2K;4K	29	12	59			0	0.169014	16.9014
2K;4K	31	12	59			0	0.169014	16.9014
2K;4K	33	12	59			0	0.169014	16.9014
2K;4K	35	12	59			0	0.169014	16.9014
2K;4K	38	12	59			0	0.169014	16.9014
2K;4K	40	12	59			0	0.169014	16.9014
2K;4K		12	59			0	0.169014	16.9014
14
14
14
14
14
14
14
14
14
14
14
14
14
15L
15
15
15
15
15
15
15
15
15
15
15
15
15
15
15
15
15
16
16
16
16
16
16
16
16
16
16
16
16
16
16
16
16
16
16
17
17
17
17
17
17
17
17
17
17
17
17
17
17
17
17
17
17
18
18
18
18
18
18
18
18
18
18
18
18
18
18
18
18
18
18
18
19
19
19
19
19
19
19
19
19
19
19
19
19
19
19
19
19
19
20
20
20
20
20
20
20
20
20
20
20
20
20
20
20
20
20
20
21
21	5	0	0	0	0	0	#DIV/0!	#DIV/0!
21	7	0	0	0	0	0	#DIV/0!	#DIV/0!
21	10	0	0	0	0	0	#DIV/0!	#DIV/0!
21	12	0	0	0	0	0	#DIV/0!	#DIV/0!
21	14	0	0	0	0	0	#DIV/0!	#DIV/0!
21	17	0	0	0	0	0	#DIV/0!	#DIV/0!
21	19	-8	8	7	1	0	#DIV/0!	#DIV/0!
21	21	-27	27	4	15	0	#DIV/0!	#DIV/0!
21	24	-48	48	17	4	0	#DIV/0!	#DIV/0!
21	26	-86	86	31	7	0	#DIV/0!	#DIV/0!
21	29	-116	116	29	1	0	#DIV/0!	#DIV/0!
21	31	-125	125	9	0	0	#DIV/0!	#DIV/0!
21	33	-143	143	18	0	0	#DIV/0!	#DIV/0!
21	35	-149	149	6	0	0	#DIV/0!	#DIV/0!
21	38	-154	154	5	0	0	#DIV/0!	#DIV/0!
21	40	-154	154	0	0	0	#DIV/0!	#DIV/0!
21		-154	154	0	0	0	#DIV/0!	#DIV/0!

## Sheet: IF censored
strain	day	alive	dead-total	dead-normal	dead-ruptured	censored	ratio-alive	percentage-alive
N2	0	48	0	0	0	0	1	100
N2	5	48	0	0	0	0	1	100
N2	7	48	0	0	0	0	1	100						1	2	3	4	5	6	7
N2	10	48	0	0	0	0	1	100			plot data here-->		day	WT	fmo-2 OE	fmo-2	fmo-1	fmo-4	fmo-4 OE	fmo-2O;4O	fmo-2O;4K	fmo-2O;1K	fmo-2K;4K
N2	12	48	0		0	0	1	100				0	0	100	100	100	100	100	100	100	100	100	100
N2	14	48	0			0	1	100				5	5	100	100	100	100	100	100	100	100	100	100
N2	17	38	10	10		0	0.791667	79.1667				7	7	100	100	100	100	100	100	100	100	100	100
N2	19	36	12	2		0	0.75	75				10	10	100	100	100	100	100	100	100	100	100	100
N2	21	32	16	4		0	0.666667	66.6667				12	12	100	100	100	100	100	100	100	100	100	100
N2	24	27	21	5		0	0.5625	56.25				14	14	100	100	100	100	100	100	100	100	100	100
N2	26	20	28	7		0	0.416667	41.6667				17	17	79.1667	94.2308	86.7647	79.4872	81.25	80	86	87.0968	83.3333	65.9574
N2	30	15	33	5		0	0.3125	31.25				19	19	75	82.6923	67.6471	61.5385	58.3333	60	76	72.5806	75	40.4255
N2	32	10	38	5	0	0	0.208333	20.8333				21	21	66.6667	75	51.4706	35.8974	39.5833	45	72	43.5484	66.6667	19.1489
N2	34	4	44	6	0	0	0.0833333	8.33333				24	24	56.25	69.2308	38.2353	28.2051	31.25	32.5	64	32.2581	0	12.766
N2	37	1	47	3	0	0	0.0208333	2.08333				26	26	41.6667	57.6923	23.5294	17.9487	16.6667	27.5	56	17.7419		4.25532
N2	39	0	48	1	0	0	0	0				28	28	31.25	46.1538	4.41176	2.5641	6.25	12.5	38	0		0
N2	41	0	48		0	0	0	0				31	31	20.8333	30.7692	0	0	0	10	24
N2	44	0	48		0	0	0	0				33	33	8.33333	17.3077				0	14
N2	46	0	48		0	0	0	0				35	35	2.08333	3.84615					4
												38	38	0	1.92308					2
C9	0	52	0	0	0	0	1	100				40	40		0					0
C9	5	52	0	0	0	0	1	100				42	42
C9	7	52	0	0	0	0	1	100				45	45
C9	10	52	0	0	0	0	1	100
C9	12	52	0			0	1	100
C9	14	52	0			0	1	100
C9	17	49	3	3		0	0.942308	94.2308
C9	19	43	9	6		0	0.826923	82.6923
C9	21	39	13	4		0	0.75	75
C9	24	36	16	3		0	0.692308	69.2308
C9	26	30	22	6		0	0.576923	57.6923
C9	28	24	28	6		0	0.461538	46.1538
C9	32	16	36	8		0	0.307692	30.7692
C9	34	9	43	7		0	0.173077	17.3077
C9	37	2	50	7		0	0.0384615	3.84615
C9	39	1	51	1		0	0.0192308	1.92308
C9	41	0	52	1		0	0	0
C9	44	0	52			0	0	0
C9	46	0	52			0	0	0
fmo-2	0	68	0	0	0	0	1	100
fmo-2	5	68	0	0	0	0	1	100
fmo-2	7	68	0	0	0	0	1	100
fmo-2	10	68	0	0	0	0	1	100
fmo-2	12	68	0			0	1	100
fmo-2	14	68	0			0	1	100
fmo-2	17	59	9	9		0	0.867647	86.7647
fmo-2	19	46	22	13		0	0.676471	67.6471
fmo-2	21	35	33	11		0	0.514706	51.4706
fmo-2	24	26	42	9		0	0.382353	38.2353
fmo-2	26	16	52	10		0	0.235294	23.5294
fmo-2	28	3	65	13		0	0.0441176	4.41176
fmo-2	32	0	68	3		0	0	0
fmo-2	34	0	68		0	0	0	0
fmo-2	37	0	68		0	0	0	0
fmo-2	39	0	68		0	0	0	0
fmo-2	41	0	68		0	0	0	0
fmo-2	44	0	68		0	0	0	0
fmo-2	46	0	68		0	0	0	0
1KO	0	39	0	0	0	0	1	100
1KO	5	39	0	0	0	0	1	100
1KO	7	39	0	0	0	0	1	100
1KO	10	39	0	0	0	0	1	100
1KO	12	39	0		0	0	1	100
1KO	14	39	0		0	0	1	100
1KO	17	31	8	8	0	0	0.794872	79.4872
1KO	19	24	15	7	0	0	0.615385	61.5385
1KO	21	14	25	10	0	0	0.358974	35.8974
1KO	24	11	28	3	0	0	0.282051	28.2051
1KO	26	7	32	4	0	0	0.179487	17.9487
1KO	28	1	38	6	0	0	0.025641	2.5641
1KO	32	0	39	1	0	0	0	0
1KO	34	0	39		0	0	0	0
1KO	37	0	39		0	0	0	0
1KO	39	0	39		0	0	0	0
1KO	41	0	39		0	0	0	0
1KO	44	0	39		0	0	0	0
1KO	46	0	39		0	0	0	0
4KO	0	48	0	0	0	0	1	100
4KO	5	48	0	0	0	0	1	100
4KO	7	48	0	0	0	0	1	100
4KO	10	48	0	0	0	0	1	100
4KO	12	48	0		0	0	1	100
4KO	14	48	0		0	0	1	100
4KO	17	39	9	9	0	0	0.8125	81.25
4KO	19	30	18	9		0	0.625	62.5
4KO	21	21	27	9	0	0	0.4375	43.75
4KO	24	17	31	4	0	0	0.354167	35.4167
4KO	26	10	38	7	0	0	0.208333	20.8333
4KO	28	5	43	5	0	0	0.104167	10.4167
4KO	32	2	46	3	0	0	0.0416667	4.16667
4KO	34	0	48	2	0	0	0	0
4KO	37	0	48		0	0	0	0
4KO	39	0	48		0	0	0	0
4KO	41	0	48	0	0	0	0	0
4KO	44	0	48	0	0	0	0	0
4KO	46	0	48	0	0	0	0	0
4OE	0	40	0	0	0	0	1	100
4OE	5	40	0	0	0	0	1	100
4OE	7	40	0	0	0	0	1	100
4OE	10	40	0	0	0	0	1	100
4OE	12	40	0		0	0	1	100
4OE	14	40	0			0	1	100
4OE	17	32	8	8	0	0	0.8	80
4OE	19	24	16	8		0	0.6	60
4OE	21	18	22	6	0	0	0.45	45
4OE	24	13	27	5	0	0	0.325	32.5
4OE	26	11	29	2	0	0	0.275	27.5
4OE	28	5	35	6	0	0	0.125	12.5
4OE	32	4	36	1	0	0	0.1	10
4OE	34	0	40	4	0	0	0	0
4OE	37	0	40		0	0	0	0
4OE	39	0	40		0	0	0	0
4OE	41	0	40		0	0	0	0
4OE	44	0	40		0	0	0	0
4OE	46	0	40		0	0	0	0
2O;4O	0	50	0	0	0	0	1	100
2O;4O	5	50	0	0	0	0	1	100
2O;4O	7	50	0	0	0	0	1	100
2O;4O	10	50	0	0	0	0	1	100
2O;4O	12	50	0			0	1	100
2O;4O	14	50	0			0	1	100
2O;4O	17	43	7	7		0	0.86	86
2O;4O	19	38	12	5	0	0	0.76	76
2O;4O	21	36	14	2	0	0	0.72	72
2O;4O	24	32	18	4	0	0	0.64	64
2O;4O	26	28	22	4	0	0	0.56	56
2O;4O	28	19	31	9	0	0	0.38	38
2O;4O	32	12	38	7	0	0	0.24	24
2O;4O	34	7	43	5	0	0	0.14	14
2O;4O	37	2	48	5	0	0	0.04	4
2O;4O	39	1	49	1	0	0	0.02	2
2O;4O	41	0	50	1	0	0	0	0
2O;4O	44	0	50		0	0	0	0
2O;4O	46	0	50		0	0	0	0
2O;4KO	0	62	0	0	0	0	1	100
2O;4KO	5	62	0	0	0	0	1	100
2O;4KO	7	62	0	0	0	0	1	100
2O;4KO	10	62	0	0	0	0	1	100
2O;4KO	12	62	0			0	1	100
2O;4KO	14	62	0			0	1	100
2O;4KO	17	54	8	8	0	0	0.870968	87.0968
2O;4KO	19	45	17	9	0	0	0.725806	72.5806
2O;4KO	21	27	35	18	0	0	0.435484	43.5484
2O;4KO	24	20	42	7	0	0	0.322581	32.2581
2O;4KO	26	11	51	9	0	0	0.177419	17.7419
2O;4KO	28	0	62	11	0	0	0	0
2O;4KO	32	0	62		0	0	0	0
2O;4KO	34	0	62		0	0	0	0
2O;4KO	37	0	62		0	0	0	0
2O;4KO	39	0	62	0	0	0	0	0
2O;4KO	41	0	62	0	0	0	0	0
2O;4KO	44	0	62	0	0	0	0	0
	46
2O;1KO	0	12	0	0	0	0	1	100
2O;1KO	5	12	0	0	0	0	1	100
2O;1KO	7	12	0	0	0	0	1	100
2O;1KO	10	12	0	0	0	0	1	100
2O;1KO	12	12	0			0	1	100
2O;1KO	14	12	0			0	1	100
2O;1KO	17	10	2	2		0	0.833333	83.3333
2O;1KO	19	9	3	1		0	0.75	75
2O;1KO	21	8	4	1		0	0.666667	66.6667
2O;1KO	24	0	12	8		0	0	0
2O;1KO	26	0	12			0	0	0
2O;1KO	28	0	12		0	0	0	0
2O;1KO	32	0	12		0	0	0	0
2O;1KO	34	0	12		0	0	0	0
2O;1KO	37	0	12		0	0	0	0
2O;1KO	39	0	12		0	0	0	0
2O;1KO	41	0	12		0	0	0	0
2O;1KO	44	0	12		0	0	0	0
2O;1KO	46	0	12		0		0	0
2O;1KO	47	0	12		0		0	0
2K;4K	0	47	0	0	0	0	1	100
2K;4K	5	47	0	0	0	0	1	100
2K;4K	7	47	0	0	0	0	1	100
2K;4K	10	47	0	0	0	0	1	100
2K;4K	12	47	0		0	0	1	100
2K;4K	14	47	0		0	0	1	100
2K;4K	17	31	16	16	0	0	0.659574	65.9574
2K;4K	19	19	28	12		0	0.404255	40.4255
2K;4K	21	9	38	10		0	0.191489	19.1489
2K;4K	24	6	41	3		0	0.12766	12.766
2K;4K	26	2	45	4		0	0.0425532	4.25532
2K;4K	29	0	47	2		0	0	0
2K;4K	31	0	47			0	0	0
2K;4K	33	0	47			0	0	0
2K;4K	35	0	47			0	0	0
2K;4K	38	0	47			0	0	0
2K;4K	40	0	47			0	0	0
2K;4K		0	47			0	0	0
14
14
14
14
14
14
14
14
14
14
14
14
14
15L
15
15
15
15
15
15
15
15
15
15
15
15
15
15
15
15
15
16
16
16
16
16
16
16
16
16
16
16
16
16
16
16
16
16
16
17
17
17
17
17
17
17
17
17
17
17
17
17
17
17
17
17
17
18
18
18
18
18
18
18
18
18
18
18
18
18
18
18
18
18
18
18
19
19
19
19
19
19
19
19
19
19
19
19
19
19
19
19
19
19
20
20
20
20
20
20
20
20
20
20
20
20
20
20
20
20
20
20
21
21	5	0	0	0	0	0	#DIV/0!	#DIV/0!
21	7	0	0	0	0	0	#DIV/0!	#DIV/0!
21	10	0	0	0	0	0	#DIV/0!	#DIV/0!
21	12	0	0	0	0	0	#DIV/0!	#DIV/0!
21	14	0	0	0	0	0	#DIV/0!	#DIV/0!
21	17	0	0	0	0	0	#DIV/0!	#DIV/0!
21	19	-8	8	7	1	0	#DIV/0!	#DIV/0!
21	21	-27	27	4	15	0	#DIV/0!	#DIV/0!
21	24	-48	48	17	4	0	#DIV/0!	#DIV/0!
21	26	-86	86	31	7	0	#DIV/0!	#DIV/0!
21	29	-116	116	29	1	0	#DIV/0!	#DIV/0!
21	31	-125	125	9	0	0	#DIV/0!	#DIV/0!
21	33	-143	143	18	0	0	#DIV/0!	#DIV/0!
21	35	-149	149	6	0	0	#DIV/0!	#DIV/0!
21	38	-154	154	5	0	0	#DIV/0!	#DIV/0!
21	40	-154	154	0	0	0	#DIV/0!	#DIV/0!
21		-154	154	0	0	0	#DIV/0!	#DIV/0!
