# Supplementary material for: fmo-4 promotes longevity and stress resistance via ER to mitochondria calcium regulation in C. elegans
Source: eLife journal article supplement (doi:10.7554/elife.99971), 2024-08-27
Supplement: fig3-figsupp3-data1 [file 07152022 4O2K lifespan 1.xlsx]

## Sheet: lifespan
strain	day	alive	dead-total	dead-normal	dead-ruptured	censored	ratio-alive	percentage-alive
N2 EV	0	116	0				1	100
N2 EV	5	116	0				1	100
N2 EV	7	116	0				1	100						1	2	3	4	5	6	7	8	9	10	11	12	13	14	15
N2 EV	10	116	0	0			1	100			plot data here-->		day	WT	fmo-4 OE	fmo-2 KO	fmo-4O;2K 2	fmo-4O;2K 8
N2 EV	12	116	0	0			1	100				0	0	100	100	100	100	100
N2 EV	14	113	3	3			0.974138	97.4138				5	5	100	100	100	100	100
N2 EV	17	108	8	5			0.931034	93.1034				7	7	100	100	100	100	100
N2 EV	19	97	19	11			0.836207	83.6207				10	10	100	100	100	100	100
N2 EV	21	88	28	9			0.758621	75.8621				12	12	100	100	99.1071	100	100
N2 EV	24	56	60	32			0.482759	48.2759				14	14	97.4138	100	94.6429	100	100
N2 EV	26	12	104	44			0.103448	10.3448				17	17	93.1034	99.0741	91.9643	95.4955	97.0588
N2 EV	28	3	113	9			0.0258621	2.58621				19	19	83.6207	94.4444	81.25	90.0901	91.1765
N2 EV	31	0	116	3			0	0				21	21	75.8621	86.1111	75	81.982	82.3529
N2 EV	33	0	116				0	0				24	24	48.2759	64.8148	41.9643	55.8559	58.8235
N2 EV	35	0	116				0	0				26	26	10.3448	33.3333	8.03571	28.8288	35.2941
N2 EV	38	0	116				0	0				28	28	2.58621	20.3704	0	15.3153	17.6471
N2 EV	40	0	116				0	0				31	31	0	9.25926		5.40541	8.82353
N2 EV	42	0	116				0	0				33	33		3.7037		2.7027	5.88235
N2 EV	45	0	116				0	0				35	35		0		0.900901	0
												38	38				0
4oe	0	108	0				1	100				40	40
4oe	5	108	0				1	100				42	42
4oe	7	108	0				1	100				45	45
4oe	9	108	0	0			1	100
4oe	13	108	0	0			1	100
4oe	15	108	0	0			1	100
4oe	17	107	1	1			0.990741	99.0741
4oe	20	102	6	5			0.944444	94.4444
4oe	22	93	15	9			0.861111	86.1111
4oe	24	70	38	23			0.648148	64.8148
4oe	27	36	72	34			0.333333	33.3333
4oe	29	22	86	14			0.203704	20.3704
4oe	31	10	98	12			0.0925926	9.25926
4oe	34	4	104	6			0.037037	3.7037
4oe	36	0	108	4			0	0
4oe	38	0	108				0	0
4oe	41	0	108				0	0
4oe	43	0	108				0	0
4oe	45	0	108				0	0
2ko	0	112	0				1	100
2ko	5	112	0				1	100
2ko	7	112	0				1	100
2ko	9	112	0	0			1	100
2ko	13	111	1	1			0.991071	99.1071
2ko	15	106	6	5			0.946429	94.6429
2ko	17	103	9	3			0.919643	91.9643
2ko	20	91	21	12			0.8125	81.25
2ko	22	84	28	7			0.75	75
2ko	24	47	65	37			0.419643	41.9643
2ko	27	9	103	38			0.0803571	8.03571
2ko	29	0	112	9			0	0
2ko	31	0	112				0	0
2ko	34	0	112				0	0
2ko	36	0	112				0	0
2ko	38	0	112				0	0
2ko	41	0	112				0	0
2ko	43	0	112				0	0
2ko	45	0	112				0	0
4o2k 2	0	111	0				1	100
4o2k 2	5	111	0				1	100
4o2k 2	7	111	0				1	100
4o2k 2	9	111	0	0			1	100
4o2k 2	13	111	0	0			1	100
4o2k 2	15	111	0	0			1	100
4o2k 2	17	106	5	5			0.954955	95.4955
4o2k 2	20	100	11	6			0.900901	90.0901
4o2k 2	22	91	20	9			0.81982	81.982
4o2k 2	24	62	49	29			0.558559	55.8559
4o2k 2	27	32	79	30			0.288288	28.8288
4o2k 2	29	17	94	15			0.153153	15.3153
4o2k 2	31	6	105	11			0.0540541	5.40541
4o2k 2	34	3	108	3			0.027027	2.7027
4o2k 2	36	1	110	2			0.00900901	0.900901
4o2k 2	38	0	111	1			0	0
4o2k 2	41	0	111				0	0
4o2k 2	43	0	111				0	0
4o2k 2	45	0	111				0	0
4o2k 8	0	34	0				1	100
4o2k 8	5	34	0				1	100
4o2k 8	7	34	0				1	100
4o2k 8	9	34	0	0			1	100
4o2k 8	13	34	0	0			1	100
4o2k 8	15	34	0	0			1	100
4o2k 8	17	33	1	1			0.970588	97.0588
4o2k 8	20	31	3	2			0.911765	91.1765
4o2k 8	22	28	6	3			0.823529	82.3529
4o2k 8	24	20	14	8			0.588235	58.8235
4o2k 8	27	12	22	8			0.352941	35.2941
4o2k 8	29	6	28	6			0.176471	17.6471
4o2k 8	31	3	31	3			0.0882353	8.82353
4o2k 8	34	2	32	1			0.0588235	5.88235
4o2k 8	36	0	34	2			0	0
4o2k 8	38	0	34				0	0
4o2k 8	41	0	34				0	0
4o2k 8	43	0	34				0	0
4o2k 8	45	0	34				0	0
2O4K EV	0	125	0				1	100
2O4K EV	5	125	0				1	100
2O4K EV	7	125	0				1	100
2O4K EV	9	125	0				1	100
2O4K EV	13	125	0				1	100
2O4K EV	15	125	0				1	100
2O4K EV	17	125	0				1	100
2O4K EV	20	125	0				1	100
2O4K EV	22	125	0				1	100
2O4K EV	24	125	0				1	100
2O4K EV	27	125	0				1	100
2O4K EV	29	125	0				1	100
2O4K EV	31	125	0				1	100
2O4K EV	34	125	0				1	100
2O4K EV	36	125	0				1	100
2O4K EV	38	125	0				1	100
2O4K EV	41	125	0				1	100
2O4K EV	43	125	0				1	100
2O4K EV	45	125	0				1	100
N2 atf-4	0	115	0				1	100
N2 atf-4	5	115	0				1	100
N2 atf-4	7	115	0				1	100
N2 atf-4	9	115	0				1	100
N2 atf-4	13	115	0				1	100
N2 atf-4	15	115	0				1	100
N2 atf-4	17	115	0				1	100
N2 atf-4	20	115	0				1	100
N2 atf-4	22	115	0				1	100
N2 atf-4	24	115	0				1	100
N2 atf-4	27	115	0				1	100
N2 atf-4	29	115	0				1	100
N2 atf-4	31	115	0				1	100
N2 atf-4	34	115	0				1	100
N2 atf-4	36	115	0				1	100
N2 atf-4	38	115	0				1	100
N2 atf-4	41	115	0				1	100
N2 atf-4	43	115	0				1	100
N2 atf-4	45	115	0				1	100
C9 atf-4	0	109	0				1	100
C9 atf-4	5	109	0				1	100
C9 atf-4	7	109	0				1	100
C9 atf-4	9	109	0				1	100
C9 atf-4	13	109	0				1	100
C9 atf-4	15	109	0				1	100
C9 atf-4	17	109	0				1	100
C9 atf-4	20	109	0				1	100
C9 atf-4	22	109	0				1	100
C9 atf-4	24	109	0				1	100
C9 atf-4	27	109	0				1	100
C9 atf-4	29	109	0				1	100
C9 atf-4	31	109	0				1	100
C9 atf-4	34	109	0				1	100
C9 atf-4	36	109	0				1	100
C9 atf-4	38	109	0				1	100
C9 atf-4	41	109	0				1	100
C9 atf-4	43	109	0				1	100
C9 atf-4	45
fmo2 atf-4	0	77	0				1	100
fmo2 atf-4	5	77	0				1	100
fmo2 atf-4	7	77	0				1	100
fmo2 atf-4	9	77	0				1	100
fmo2 atf-4	13	77	0				1	100
fmo2 atf-4	15	77	0				1	100
fmo2 atf-4	17	77	0				1	100
fmo2 atf-4	20	77	0				1	100
fmo2 atf-4	22	77	0				1	100
fmo2 atf-4	24	77	0				1	100
fmo2 atf-4	27	77	0				1	100
fmo2 atf-4	29	77	0				1	100
fmo2 atf-4	31	77	0				1	100
fmo2 atf-4	34	77	0				1	100
fmo2 atf-4	36	77	0				1	100
fmo2 atf-4	38	77	0				1	100
fmo2 atf-4	41	77	0				1	100
fmo2 atf-4	43	77	0				1	100
fmo2 atf-4	45	77	0				1	100
fmo2 atf-4	47	77	0				1	100
4OE atf-4	0	121	0				1	100
4OE atf-4	5	121	0				1	100
4OE atf-4	7	121	0				1	100
4OE atf-4	9	121	0				1	100
4OE atf-4	13	121	0				1	100
4OE atf-4	15	121	0				1	100
4OE atf-4	17	121	0				1	100
4OE atf-4	20	121	0				1	100
4OE atf-4	22	121	0				1	100
4OE atf-4	24	121	0				1	100
4OE atf-4	27	121	0				1	100
4OE atf-4	29	121	0				1	100
4OE atf-4	31	121	0				1	100
4OE atf-4	34	121	0				1	100
4OE atf-4	36	121	0				1	100
4OE atf-4	38	121	0				1.11009	111.009
4OE atf-4	41	121	0				1.11009	111.009
4OE atf-4	43	121	0				1.11009	111.009
	45
4KO atf-4	0	82	0				1	100
4KO atf-4	5	82	0				1	100
4KO atf-4	7	82	0				1	100
4KO atf-4	9	82	0				1	100
4KO atf-4	13	82	0				1	100
4KO atf-4	15	82	0				1	100
4KO atf-4	17	82	0				1	100
4KO atf-4	20	82	0				1	100
4KO atf-4	22	82	0				1	100
4KO atf-4	24	82	0				1	100
4KO atf-4	27	82	0				1	100
4KO atf-4	29	82	0				1	100
4KO atf-4	31	82	0				1	100
4KO atf-4	34	82	0				1	100
4KO atf-4	36	82	0				1	100
4KO atf-4	38	82	0				1	100
4KO atf-4	41	82	0				1	100
4KO atf-4	43	82	0				1	100
4KO atf-4	45
2O4K atf-4	0	115	0				1	100
2O4K atf-4	5	115	0				1	100
2O4K atf-4	7	115	0				1	100
2O4K atf-4	9	115	0				1	100
2O4K atf-4	13	115	0				1	100
2O4K atf-4	15	115	0				1	100
2O4K atf-4	17	115	0				1	100
2O4K atf-4	20	115	0				1	100
2O4K atf-4	22	115	0				1	100
2O4K atf-4	24	115	0				1	100
2O4K atf-4	27	115	0				1	100
2O4K atf-4	29	115	0				1	100
2O4K atf-4	31	115	0				1	100
2O4K atf-4	34	115	0				1	100
2O4K atf-4	36	115	0				1	100
2O4K atf-4	38	115	0				1	100
2O4K atf-4	41	115	0				1	100
2O4K atf-4	43	115	0				1	100
2O4K atf-4	45
N2 atf-6	0	105	0				1	100
N2 atf-6	5	105	0				1	100
N2 atf-6	7	105	0				1	100
N2 atf-6	9	105	0				1	100
N2 atf-6	13	105	0				1	100
N2 atf-6	15	105	0				1	100
N2 atf-6	17	105	0				1	100
N2 atf-6	20	105	0				1	100
N2 atf-6	22	105	0				1	100
N2 atf-6	24	105	0				1	100
N2 atf-6	27	105	0				1	100
N2 atf-6	29	105	0				1	100
N2 atf-6	31	105	0				1	100
N2 atf-6	34	105	0				1	100
N2 atf-6	36	105	0				1	100
N2 atf-6	38	105	0				1	100
N2 atf-6	41	105	0				1	100
N2 atf-6	43	105	0				1	100
N2 atf-6	45	105	0				1	100
C9 atf-6	0	114	0				1	100
C9 atf-6	5	114	0				1	100
C9 atf-6	7	114	0				1	100
C9 atf-6	9	114	0				1	100
C9 atf-6	13	114	0				1	100
C9 atf-6	15	114	0				1	100
C9 atf-6	17	114	0				1	100
C9 atf-6	20	114	0				1	100
C9 atf-6	22	114	0				1	100
C9 atf-6	24	114	0				1	100
C9 atf-6	27	114	0				1	100
C9 atf-6	29	114	0				1	100
C9 atf-6	31	114	0				1	100
C9 atf-6	34	114	0				1	100
C9 atf-6	36	114	0				1	100
C9 atf-6	38	114	0				1	100
C9 atf-6	41	114	0				1	100
C9 atf-6	43	114	0				1	100
C9 atf-6	45
fmo2 atf-6	0	68	0				1	100
fmo2 atf-6	5	68	0				1	100
fmo2 atf-6	7	68	0				1	100
fmo2 atf-6	9	68	0				1	100
fmo2 atf-6	13	68	0				1	100
fmo2 atf-6	15	68	0				1	100
fmo2 atf-6	17	68	0				1	100
fmo2 atf-6	20	68	0				1	100
fmo2 atf-6	22	68	0				1	100
fmo2 atf-6	24	68	0				1	100
fmo2 atf-6	27	68	0				1	100
fmo2 atf-6	29	68	0				1	100
fmo2 atf-6	31	68	0				1	100
fmo2 atf-6	34	68	0				1	100
fmo2 atf-6	36	68	0				1	100
fmo2 atf-6	38	68	0				1	100
fmo2 atf-6	41	68	0				1	100
fmo2 atf-6	43	68	0				1	100
fmo2 atf-6	45
4OE atf-6	0	69	0			0	1	100
4OE atf-6	5	69	0			0	1	100
4OE atf-6	7	69	0			0	1	100
4OE atf-6	9	69	0			0	1	100
4OE atf-6	13	69	0			0	1	100
4OE atf-6	15	69	0			0	1	100
4OE atf-6	17	69	0			0	1	100
4OE atf-6	20	69	0			0	1	100
4OE atf-6	22	69	0			0	1	100
4OE atf-6	24	69	0			0	1	100
4OE atf-6	27	69	0			0	1	100
4OE atf-6	29	69	0			0	1	100
4OE atf-6	31	69	0			0	1	100
4OE atf-6	34	69	0			0	1	100
4OE atf-6	36	69	0			0	1	100
4OE atf-6	38	69	0			0	1	100
4OE atf-6	41	69	0			0	1	100
4OE atf-6	43	69	0			0	1	100
4OE atf-6	45	69	0			0	1	100
4KO atf-6	0	89	0			0	1	100
4KO atf-6	5	89	0			0	1	100
4KO atf-6	7	89	0			0	1	100
4KO atf-6	9	89	0			0	1	100
4KO atf-6	13	89	0			0	1	100
4KO atf-6	15	89	0			0	1	100
4KO atf-6	17	89	0			0	1	100
4KO atf-6	20	89	0			0	1	100
4KO atf-6	22	89	0			0	1	100
4KO atf-6	24	89	0			0	1	100
4KO atf-6	27	89	0			0	1	100
4KO atf-6	29	89	0			0	1	100
4KO atf-6	31	89	0			0	1	100
4KO atf-6	34	89	0			0	1	100
4KO atf-6	36	89	0			0	1	100
4KO atf-6	38	89	0			0	1	100
4KO atf-6	41	89	0			0	1	100
4KO atf-6	43	89	0			0	1	100
4KO atf-6	45	89	0			0	1	100
		89
2O4K atf-6	0	87	0			0	1	100
2O4K atf-6	5	87	0			0	1	100
2O4K atf-6	7	87	0			0	1	100
2O4K atf-6	9	87	0			0	1	100
2O4K atf-6	13	87	0			0	1	100
2O4K atf-6	15	87	0			0	1	100
2O4K atf-6	17	87	0			0	1	100
2O4K atf-6	20	87	0			0	1	100
2O4K atf-6	22	87	0			0	1	100
2O4K atf-6	24	87	0			0	1	100
2O4K atf-6	27	87	0			0	1	100
2O4K atf-6	29	87	0			0	1	100
2O4K atf-6	31	87	0			0	1	100
2O4K atf-6	34	87	0			0	1	100
2O4K atf-6	36	87	0			0	1	100
2O4K atf-6	38	87	0			0	1	100
2O4K atf-6	41	87	0			0	1	100
2O4K atf-6	43	87	0			0	1	100
2O4K atf-6	45	87	0			0	1	100
							0

## Sheet: stats
% WT [116]						condition	chi	pvalue	corrected_pvalue
#days	dead	censored				WT v.s. fmo-4 OE	21.86	2.9e-06	1.2e-05
0						WT v.s. fmo-2KO	1.25	0.2645	1
5						WT v.s. fmo-4O;2K	10.72	0.0011	0.0043
7						WT v.s. fmo-4O;2K 8	8.94	0.0028	0.0112
9	0					fmo-4 OE v.s. WT	21.86	2.9e-06	1.2e-05
13	0					fmo-4 OE v.s. fmo-2KO	29.64	5.2e-08	2.1e-07
15	3					fmo-4 OE v.s. fmo-4O;2K	1.53	0.2162	0.8647
17	5					fmo-4 OE v.s. fmo-4O;2K 8	0.03	0.8521	1
20	11					fmo-2KO v.s. WT	1.25	0.2645	1
22	9					fmo-2KO v.s. fmo-4 OE	29.64	5.2e-08	2.1e-07
24	32					fmo-2KO v.s. fmo-4O;2K	16.83	4.1e-05	0.0002
27	44					fmo-2KO v.s. fmo-4O;2K 8	12.73	0.0004	0.0014
29	9					fmo-4O;2K v.s. WT	10.72	0.0011	0.0043
31	3					fmo-4O;2K v.s. fmo-4 OE	1.53	0.2162	0.8647
34						fmo-4O;2K v.s. fmo-2KO	16.83	4.1e-05	0.0002
36						fmo-4O;2K v.s. fmo-4O;2K 8	0.35	0.5547	1
38						fmo-4O;2K 8 v.s. WT	8.94	0.0028	0.0112
41						fmo-4O;2K 8 v.s. fmo-4 OE	0.03	0.8521	1
43						fmo-4O;2K 8 v.s. fmo-2KO	12.73	0.0004	0.0014
45						fmo-4O;2K 8 v.s. fmo-4O;2K	0.35	0.5547	1
% fmo-4 OE [108]
#days	dead	censored
0
5
7
9	0
13	0
15	0
17	1
20	5
22	9
24	23
27	34
29	14
31	12
34	6
36	4
38
41
43
45
% fmo-2KO [112]
#days	dead	censored
0
5
7
9	0
13	1
15	5
17	3
20	12
22	7
24	37
27	38
29	9
31
34
36
38
41
43
45
% fmo-4O;2K [111]
#days	dead	censored
0
5
7
9	0
13	0
15	0
17	5
20	6
22	9
24	29
27	30
29	15
31	11
34	3
36	2
38	1
41
43
45
% fmo-4O;2K 8 [34]
#days	dead	censored
0
5
7
9	0
13	0
15	0
17	1
20	2
22	3
24	8
27	8
29	6
31	3
34	1
36	2
38
41
43
45

## Sheet: stats atf-6
% WT EV [119]							condition	chi	pvalue	corrected_pvalue
#days	dead	censored					WT EV v.s. WT atf6	34.18	5e-09	4.5e-08
0							WT EV v.s. C9 atf6	45.08	0	0
5							WT EV v.s. fmo2 atf6	0.15	0.6982	1
7							WT EV v.s. 4OE atf6	6.51	0.0107	0.0964
9	0						WT EV v.s. 4KO atf6	0.77	0.3791	1
13	1						WT EV v.s. fmo-2 OE EV	49.67	0	0
15	4						WT EV v.s. fmo-4 OE EV	53.7	0	0
17	7						WT EV v.s. fmo-4 KO EV	2.67	0.1022	0.9196
20	13						WT EV v.s. fmo-2 KO EV	0.01	0.9183	1
22	12						WT atf6 v.s. WT EV	34.18	5e-09	4.5e-08
24	31						WT atf6 v.s. C9 atf6	1.23	0.2673	1
27	34						WT atf6 v.s. fmo2 atf6	21.42	3.7e-06	3.3e-05
29	9						WT atf6 v.s. 4OE atf6	4.31	0.038	0.3417
31	8						WT atf6 v.s. 4KO atf6	23.22	1.4e-06	1.3e-05
34							WT atf6 v.s. fmo-2 OE EV	2.39	0.1221	1
36							WT atf6 v.s. fmo-4 OE EV	2.94	0.0866	0.7798
38							WT atf6 v.s. fmo-4 KO EV	44.29	0	0
41							WT atf6 v.s. fmo-2 KO EV	28.57	9e-08	8.1e-07
43							C9 atf6 v.s. WT EV	45.08	0	0
45							C9 atf6 v.s. WT atf6	1.23	0.2673	1
							C9 atf6 v.s. fmo2 atf6	28.92	7.5e-08	6.8e-07
% WT atf6 [105]							C9 atf6 v.s. 4OE atf6	8.48	0.0036	0.0324
#days	dead	censored					C9 atf6 v.s. 4KO atf6	31.98	1.6e-08	1.4e-07
0							C9 atf6 v.s. fmo-2 OE EV	0.21	0.6445	1
5							C9 atf6 v.s. fmo-4 OE EV	0.31	0.5776	1
7							C9 atf6 v.s. fmo-4 KO EV	55.08	0	0
9	0						C9 atf6 v.s. fmo-2 KO EV	37.13	0	0
13	0						fmo2 atf6 v.s. WT EV	0.15	0.6982	1
15	0						fmo2 atf6 v.s. WT atf6	21.42	3.7e-06	3.3e-05
17	3						fmo2 atf6 v.s. C9 atf6	28.92	7.5e-08	6.8e-07
20	7						fmo2 atf6 v.s. 4OE atf6	3.31	0.0687	0.6187
22	8						fmo2 atf6 v.s. 4KO atf6	0.14	0.704	1
24	18						fmo2 atf6 v.s. fmo-2 OE EV	32.35	1.3e-08	1.2e-07
27	17						fmo2 atf6 v.s. fmo-4 OE EV	35.46	2.6e-09	2.4e-08
29	21						fmo2 atf6 v.s. fmo-4 KO EV	2.99	0.0836	0.752
31	13						fmo2 atf6 v.s. fmo-2 KO EV	0.15	0.7008	1
34	15						4OE atf6 v.s. WT EV	6.51	0.0107	0.0964
36	2						4OE atf6 v.s. WT atf6	4.31	0.038	0.3417
38	1						4OE atf6 v.s. C9 atf6	8.48	0.0036	0.0324
41							4OE atf6 v.s. fmo2 atf6	3.31	0.0687	0.6187
43							4OE atf6 v.s. 4KO atf6	3.3	0.0694	0.6243
45							4OE atf6 v.s. fmo-2 OE EV	10.87	0.001	0.0088
							4OE atf6 v.s. fmo-4 OE EV	11.57	0.0007	0.006
							4OE atf6 v.s. fmo-4 KO EV	11.22	0.0008	0.0073
% C9 atf6 [114]							4OE atf6 v.s. fmo-2 KO EV	5.37	0.0205	0.1849
#days	dead	censored					4KO atf6 v.s. WT EV	0.77	0.3791	1
0							4KO atf6 v.s. WT atf6	23.22	1.4e-06	1.3e-05
5							4KO atf6 v.s. C9 atf6	31.98	1.6e-08	1.4e-07
7							4KO atf6 v.s. fmo2 atf6	0.14	0.704	1
9	0						4KO atf6 v.s. 4OE atf6	3.3	0.0694	0.6243
13	2						4KO atf6 v.s. fmo-2 OE EV	35.51	2.6e-09	2.3e-08
15	1						4KO atf6 v.s. fmo-4 OE EV	39.59	0	0
17	4						4KO atf6 v.s. fmo-4 KO EV	5.58	0.0182	0.1639
20	6						4KO atf6 v.s. fmo-2 KO EV	0.59	0.4429	1
22	7						fmo-2 OE EV v.s. WT EV	49.67	0	0
24	14						fmo-2 OE EV v.s. WT atf6	2.39	0.1221	1
27	15						fmo-2 OE EV v.s. C9 atf6	0.21	0.6445	1
29	27						fmo-2 OE EV v.s. fmo2 atf6	32.35	1.3e-08	1.2e-07
31	15						fmo-2 OE EV v.s. 4OE atf6	10.87	0.001	0.0088
34	16						fmo-2 OE EV v.s. 4KO atf6	35.51	2.6e-09	2.3e-08
36	2						fmo-2 OE EV v.s. fmo-4 OE EV	0.01	0.9312	1
38	5						fmo-2 OE EV v.s. fmo-4 KO EV	59.81	0	0
41							fmo-2 OE EV v.s. fmo-2 KO EV	40.57	0	0
43							fmo-4 OE EV v.s. WT EV	53.7	0	0
45							fmo-4 OE EV v.s. WT atf6	2.94	0.0866	0.7798
							fmo-4 OE EV v.s. C9 atf6	0.31	0.5776	1
							fmo-4 OE EV v.s. fmo2 atf6	35.46	2.6e-09	2.4e-08
							fmo-4 OE EV v.s. 4OE atf6	11.57	0.0007	0.006
% fmo2 atf6 [68]							fmo-4 OE EV v.s. 4KO atf6	39.59	0	0
#days	dead	censored					fmo-4 OE EV v.s. fmo-2 OE EV	0.01	0.9312	1
0							fmo-4 OE EV v.s. fmo-4 KO EV	64.02	0	0
5							fmo-4 OE EV v.s. fmo-2 KO EV	44.86	0	0
7							fmo-4 KO EV v.s. WT EV	2.67	0.1022	0.9196
9	0						fmo-4 KO EV v.s. WT atf6	44.29	0	0
13	3						fmo-4 KO EV v.s. C9 atf6	55.08	0	0
15	2						fmo-4 KO EV v.s. fmo2 atf6	2.99	0.0836	0.752
17	3						fmo-4 KO EV v.s. 4OE atf6	11.22	0.0008	0.0073
20	5						fmo-4 KO EV v.s. 4KO atf6	5.58	0.0182	0.1639
22	9						fmo-4 KO EV v.s. fmo-2 OE EV	59.81	0	0
24	16						fmo-4 KO EV v.s. fmo-4 OE EV	64.02	0	0
27	15						fmo-4 KO EV v.s. fmo-2 KO EV	1.89	0.1691	1
29	12						fmo-2 KO EV v.s. WT EV	0.01	0.9183	1
31	2						fmo-2 KO EV v.s. WT atf6	28.57	9e-08	8.1e-07
34	1						fmo-2 KO EV v.s. C9 atf6	37.13	0	0
36							fmo-2 KO EV v.s. fmo2 atf6	0.15	0.7008	1
38							fmo-2 KO EV v.s. 4OE atf6	5.37	0.0205	0.1849
41							fmo-2 KO EV v.s. 4KO atf6	0.59	0.4429	1
43							fmo-2 KO EV v.s. fmo-2 OE EV	40.57	0	0
45							fmo-2 KO EV v.s. fmo-4 OE EV	44.86	0	0
							fmo-2 KO EV v.s. fmo-4 KO EV	1.89	0.1691	1
% 4OE atf6 [69]
#days	dead	censored
0
5
7
9	0
13	3
15	1
17	9
20	4
22	6
24	10
27	14
29	9
31	4
34	8
36	0
38	1
41
43
45
% 4KO atf6 [89]
#days	dead	censored
0
5
7
9	0
13	3
15	3
17	7
20	4
22	8
24	20
27	22
29	18
31	4
34
36
38
41
43
45
% fmo-2 OE EV [112]
#days	dead	censored
0
5
7
9	0
13	1
15	1
17	4
20	6
22	6
24	11
27	19
29	25
31	15
34	14
36	6
38	2
41	0
43	2
45
% fmo-4 OE EV [117]
#days	dead	censored
0
5
7
9	0
13	2
15	2
17	4
20	5
22	6
24	13
27	14
29	26
31	19
34	17
36	4
38	5
41
43
45
% fmo-4 KO EV [100]
#days	dead	censored
0
5
7
9	0
13	4
15	7
17	5
20	13
22	10
24	27
27	21
29	11
31	2
34
36
38
41
43
45
% fmo-2 KO EV [86]
#days	dead	censored
0
5
7
9	0
13	3
15	5
17	9
20	8
22	10
24	14
27	15
29	19
31	3
34
36
38
41
43
45

## Sheet: stats atf-4
% WT EV [119]								condition	chi	pvalue	corrected_pvalue
#days	dead	censored						WT EV v.s. WT atf4	12.96	0.0003	0.0029	****
0								WT EV v.s. C9 atf4	42.64	0	0	****
5								WT EV v.s. fmo2 atf4	0.68	0.4106	1	NS
7								WT EV v.s. 4OE atf4	39.94	0	0	****
9	0							WT EV v.s. 4KO atf4	0.12	0.7286	1	NS
13	1							WT EV v.s. fmo-2 OE EV	49.67	0	0	****
15	4							WT EV v.s. fmo-4 OE EV	53.7	0	0	****
17	7							WT EV v.s. fmo-4 KO EV	2.67	0.1022	0.9196
20	13							WT EV v.s. fmo-2 KO EV	0.01	0.9183	1
22	12							WT atf4 v.s. WT EV	12.96	0.0003	0.0029
24	31							WT atf4 v.s. C9 atf4	19.14	1.2e-05	0.0001
27	34							WT atf4 v.s. fmo2 atf4	17.05	3.6e-05	0.0003
29	9							WT atf4 v.s. 4OE atf4	10.92	0.001	0.0086
31	8							WT atf4 v.s. 4KO atf4	9.11	0.0025	0.0228
34								WT atf4 v.s. fmo-2 OE EV	22.68	1.9e-06	1.7e-05
36								WT atf4 v.s. fmo-4 OE EV	27.03	2e-07	1.8e-06
38								WT atf4 v.s. fmo-4 KO EV	25.49	4.4e-07	4e-06
41								WT atf4 v.s. fmo-2 KO EV	10.21	0.0014	0.0126
43								C9 atf4 v.s. WT EV	42.64	0	0
45								C9 atf4 v.s. WT atf4	19.14	1.2e-05	0.0001
								C9 atf4 v.s. fmo2 atf4	40.62	0	0
% WT atf4 [115]								C9 atf4 v.s. 4OE atf4	3.01	0.0826	0.7435
#days	dead	censored						C9 atf4 v.s. 4KO atf4	34.45	4.4e-09	3.9e-08
0								C9 atf4 v.s. fmo-2 OE EV	0.39	0.5315	1
5								C9 atf4 v.s. fmo-4 OE EV	0.64	0.4252	1
7								C9 atf4 v.s. fmo-4 KO EV	53.23	0	0
9	0							C9 atf4 v.s. fmo-2 KO EV	36.3	0	0
13	1							fmo2 atf4 v.s. WT EV	0.68	0.4106	1
15	4							fmo2 atf4 v.s. WT atf4	17.05	3.6e-05	0.0003
17	1							fmo2 atf4 v.s. C9 atf4	40.62	0	0
20	5							fmo2 atf4 v.s. 4OE atf4	40.58	0	0
22	8							fmo2 atf4 v.s. 4KO atf4	0.14	0.7086	1
24	26							fmo2 atf4 v.s. fmo-2 OE EV	46.4	0	0
27	24							fmo2 atf4 v.s. fmo-4 OE EV	49.75	0	0
29	36							fmo2 atf4 v.s. fmo-4 KO EV	0.53	0.4661	1
31	10							fmo2 atf4 v.s. fmo-2 KO EV	0.42	0.5179	1
34								4OE atf4 v.s. WT EV	39.94	0	0
36								4OE atf4 v.s. WT atf4	10.92	0.001	0.0086
38								4OE atf4 v.s. C9 atf4	3.01	0.0826	0.7435
41								4OE atf4 v.s. fmo2 atf4	40.58	0	0
43								4OE atf4 v.s. 4KO atf4	29.87	4.6e-08	4.2e-07
45								4OE atf4 v.s. fmo-2 OE EV	4.87	0.0274	0.2463
								4OE atf4 v.s. fmo-4 OE EV	6.53	0.0106	0.0952
								4OE atf4 v.s. fmo-4 KO EV	53.4	0	0
% C9 atf4 [109]								4OE atf4 v.s. fmo-2 KO EV	31	2.6e-08	2.3e-07
#days	dead	censored						4KO atf4 v.s. WT EV	0.12	0.7286	1
0								4KO atf4 v.s. WT atf4	9.11	0.0025	0.0228
5								4KO atf4 v.s. C9 atf4	34.45	4.4e-09	3.9e-08
7								4KO atf4 v.s. fmo2 atf4	0.14	0.7086	1
9	0							4KO atf4 v.s. 4OE atf4	29.87	4.6e-08	4.2e-07
13	0							4KO atf4 v.s. fmo-2 OE EV	39.7	0	0
15	3							4KO atf4 v.s. fmo-4 OE EV	43.09	0	0
17	5							4KO atf4 v.s. fmo-4 KO EV	1.11	0.2925	1
20	5							4KO atf4 v.s. fmo-2 KO EV	0.01	0.9399	1
22	7							fmo-2 OE EV v.s. WT EV	49.67	0	0
24	14							fmo-2 OE EV v.s. WT atf4	22.68	1.9e-06	1.7e-05
27	12							fmo-2 OE EV v.s. C9 atf4	0.39	0.5315	1
29	25							fmo-2 OE EV v.s. fmo2 atf4	46.4	0	0
31	19							fmo-2 OE EV v.s. 4OE atf4	4.87	0.0274	0.2463
34	10							fmo-2 OE EV v.s. 4KO atf4	39.7	0	0
36	7							fmo-2 OE EV v.s. fmo-4 OE EV	0.01	0.9312	1
38	2							fmo-2 OE EV v.s. fmo-4 KO EV	59.81	0	0
41								fmo-2 OE EV v.s. fmo-2 KO EV	40.57	0	0
43								fmo-4 OE EV v.s. WT EV	53.7	0	0
45								fmo-4 OE EV v.s. WT atf4	27.03	2e-07	1.8e-06
								fmo-4 OE EV v.s. C9 atf4	0.64	0.4252	1
								fmo-4 OE EV v.s. fmo2 atf4	49.75	0	0
								fmo-4 OE EV v.s. 4OE atf4	6.53	0.0106	0.0952
% fmo2 atf4 [77]								fmo-4 OE EV v.s. 4KO atf4	43.09	0	0
#days	dead	censored						fmo-4 OE EV v.s. fmo-2 OE EV	0.01	0.9312	1
0								fmo-4 OE EV v.s. fmo-4 KO EV	64.02	0	0
5								fmo-4 OE EV v.s. fmo-2 KO EV	44.86	0	0
7								fmo-4 KO EV v.s. WT EV	2.67	0.1022	0.9196
9	0							fmo-4 KO EV v.s. WT atf4	25.49	4.4e-07	4e-06
13	0							fmo-4 KO EV v.s. C9 atf4	53.23	0	0
15	7							fmo-4 KO EV v.s. fmo2 atf4	0.53	0.4661	1
17	2							fmo-4 KO EV v.s. 4OE atf4	53.4	0	0
20	5							fmo-4 KO EV v.s. 4KO atf4	1.11	0.2925	1
22	10							fmo-4 KO EV v.s. fmo-2 OE EV	59.81	0	0
24	26							fmo-4 KO EV v.s. fmo-4 OE EV	64.02	0	0
27	16							fmo-4 KO EV v.s. fmo-2 KO EV	1.89	0.1691	1
29	9							fmo-2 KO EV v.s. WT EV	0.01	0.9183	1
31	2							fmo-2 KO EV v.s. WT atf4	10.21	0.0014	0.0126
34								fmo-2 KO EV v.s. C9 atf4	36.3	0	0
36								fmo-2 KO EV v.s. fmo2 atf4	0.42	0.5179	1	NS
38								fmo-2 KO EV v.s. 4OE atf4	31	2.6e-08	2.3e-07
41								fmo-2 KO EV v.s. 4KO atf4	0.01	0.9399	1
43								fmo-2 KO EV v.s. fmo-2 OE EV	40.57	0	0
45								fmo-2 KO EV v.s. fmo-4 OE EV	44.86	0	0
								fmo-2 KO EV v.s. fmo-4 KO EV	1.89	0.1691	1
% 4OE atf4 [121]
#days	dead	censored
0
5
7
9	0
13	0
15	4
17	1
20	4
22	7
24	14
27	29
29	35
31	15
34	9
36	3
38
41
43
45
% 4KO atf4 [82]
#days	dead	censored
0
5
7
9	0
13	7
15	6
17	5
20	12
22	5
24	15
27	14
29	10
31	8
34
36
38
41
43
45
% fmo-2 OE EV [112]
#days	dead	censored
0
5
7
9	0
13	1
15	1
17	4
20	6
22	6
24	11
27	19
29	25
31	15
34	14
36	6
38	2
41	0
43	2
45
% fmo-4 OE EV [117]
#days	dead	censored
0
5
7
9	0
13	2
15	2
17	4
20	5
22	6
24	13
27	14
29	26
31	19
34	17
36	4
38	5
41
43
45
% fmo-4 KO EV [100]
#days	dead	censored
0
5
7
9	0
13	4
15	7
17	5
20	13
22	10
24	27
27	21
29	11
31	2
34
36
38
41
43
45
% fmo-2 KO EV [86]
#days	dead	censored
0
5
7
9	0
13	3
15	5
17	9
20	8
22	10
24	14
27	15
29	19
31	3
34
36
38
41
43
45

## Sheet: Sheet1
#1	N2								#1	N2					#1	N2
#2	Lei42	fmo-2p::MC; unc-119p::HIF-1(P621A); JT307 #1							#2	Lei42	fmo-2p::MC; unc-119p::HIF-1(P621A); JT307 #1				#11L	Lei51	fmo-2p::MC; JT307; gcy-31; gcy-36 - XA2262 sibling #1
#3	Lei43	fmo-2p::MC; unc-119p::HIF-1(P621A); JT307 #2							#3	Lei43	fmo-2p::MC; unc-119p::HIF-1(P621A); JT307 #2				#12L	Lei52	fmo-2p::MC; JT307; gcy-33; gcy-36 - XA2262 sibling #1
#4	Lei44	fmo-2p::MC; TU3311; CB5602 #1							#4	Lei44	fmo-2p::MC; TU3311; CB5602 #1				#13	Lei53	fmo-2p::MC; JT307; gcy-33; gcy-36 - XA2262 sibling #2
#5	Lei45	fmo-2p::MC; TU3311 #1							#5	Lei45	fmo-2p::MC; TU3311 #1				#14L	Lei55	fmo-2p::MC; JT307 - XA2262 sibling #1
#6	Lei46	fmo-2p::MC; CB5602 #1							#6	Lei46	fmo-2p::MC; CB5602 #1				#15L	Lei56	fmo-2p::MC; JT307 - XA2262 sibling #2
#7	Lei47	fmo-2p::MC; TU3311; CB5602 #2							#7	Lei47	fmo-2p::MC; TU3311; CB5602 #2				#16	Lei57	fmo-2p::MC - XA2262 sibling #1
#8L	Lei48	fmo-2p::MC; JT307; XA2262 #1													#17	Lei58	fmo-2p::MC - XA2262 sibling #2
#9	Lei49	fmo-2p::MC; JT307; XA2262 #2													#18	Lei59	fmo-2p::MC; gcy-33; gcy-36 - XA2262 sibling #1
#10L	Lei50	fmo-2p::MC; JT307; XA2262 #3							#1	N2					#19	Lei60	fmo-2p::MC; gcy-33; gcy-36 - XA2262 sibling #2
#11L	Lei51	fmo-2p::MC; JT307; gcy-31; gcy-36 - XA2262 sibling #1							#8L	Lei48	fmo-2p::MC; JT307; XA2262 #1
#12L	Lei52	fmo-2p::MC; JT307; gcy-33; gcy-36 - XA2262 sibling #1							#9	Lei49	fmo-2p::MC; JT307; XA2262 #2
#13	Lei53	fmo-2p::MC; JT307; gcy-33; gcy-36 - XA2262 sibling #2							#10L	Lei50	fmo-2p::MC; JT307; XA2262 #3
#14L	Lei55	fmo-2p::MC; JT307 - XA2262 sibling #1							#14L	Lei55	fmo-2p::MC; JT307 - XA2262 sibling #1
#15L	Lei56	fmo-2p::MC; JT307 - XA2262 sibling #2							#15L	Lei56	fmo-2p::MC; JT307 - XA2262 sibling #2
#16	Lei57	fmo-2p::MC - XA2262 sibling #1							#16	Lei57	fmo-2p::MC - XA2262 sibling #1
#17	Lei58	fmo-2p::MC - XA2262 sibling #2							#17	Lei58	fmo-2p::MC - XA2262 sibling #2
#18	Lei59	fmo-2p::MC; gcy-33; gcy-36 - XA2262 sibling #1							#20	Lei61	fmo-2p::MC; XA2262 #1
#19	Lei60	fmo-2p::MC; gcy-33; gcy-36 - XA2262 sibling #2							#21	Lei62	fmo-2p::MC; XA2262 #2
#20	Lei61	fmo-2p::MC; XA2262 #1
#21	Lei62	fmo-2p::MC; XA2262 #2
