# Supplementary material for: fmo-4 promotes longevity and stress resistance via ER to mitochondria calcium regulation in C. elegans
Source: eLife journal article supplement (doi:10.7554/elife.99971), 2024-08-27
Supplement: fig3-figsupp3-data1 [file 09122022 4O2K lifespan rep 3.xlsx]

## Sheet: lifespan
strain	day	alive	dead-total	dead-normal	dead-ruptured	censored	ratio-alive	percentage-alive
N2	0	115	0				1	100
N2	5	115	0				1	100
N2	7	115	0				1	100						1	2	3	4	5	6	7	8	9	10	11	12	13	14	15
N2	10	115	0	0			1	100			plot data here-->		day	Wild-Type	FMO-4 OE	FMO-2 KO	FMO-4OE;2KO	fmo-4O;2K 8
N2	12	112	3	3			0.973913	97.3913				0	0	100	100	100	100	100
N2	14	106	9	6			0.921739	92.1739				5	5	100	100	100	100	100
N2	17	95	20	11			0.826087	82.6087				7	7	100	100	100	100	100
N2	19	79	36	16			0.686957	68.6957				10	10	100	100	100	100	100
N2	21	54	61	25			0.469565	46.9565				12	12	97.3913	99.1525	95.8333	99.1667	98.2609
N2	24	25	90	29			0.217391	21.7391				14	14	92.1739	95.7627	90	95	97.3913
N2	26	6	109	19			0.0521739	5.21739				17	17	82.6087	92.3729	77.5	90	91.3043
N2	28	3	112	3			0.026087	2.6087				19	19	68.6957	83.8983	65	80.8333	83.4783
N2	31	0	115	3			0	0				21	21	46.9565	70.339	39.1667	65	71.3043
N2	33	0	115				0	0				24	24	21.7391	55.0847	17.5	43.3333	54.7826
N2	35	0	115				0	0				26	26	5.21739	33.0508	10	25	34.7826
N2	38	0	115				0	0				28	28	2.6087	20.339	4.16667	18.3333	20.8696
N2	40	0	115				0	0				31	31	0	12.7119	0	11.6667	9.56522
N2	42	0	115				0	0				33	33		5.9322		5.83333	6.08696
N2	45	0	115				0	0				35	35		1.69492		1.66667	0.869565
												38	38		0		0	0
4oe	0	118	0				1	100				40	40
4oe	5	118	0				1	100				42	42
4oe	7	118	0				1	100				45	45
4oe	9	118	0	0			1	100
4oe	13	117	1	1			0.991525	99.1525
4oe	15	113	5	4			0.957627	95.7627
4oe	17	109	9	4			0.923729	92.3729
4oe	20	99	19	10			0.838983	83.8983
4oe	22	83	35	16			0.70339	70.339
4oe	24	65	53	18			0.550847	55.0847
4oe	27	39	79	26			0.330508	33.0508
4oe	29	24	94	15			0.20339	20.339
4oe	31	15	103	9			0.127119	12.7119
4oe	34	7	111	8			0.059322	5.9322
4oe	36	2	116	5			0.0169492	1.69492
4oe	38	0	118	2			0	0
4oe	41	0	118				0	0
4oe	43	0	118				0	0
4oe	45	0	118				0	0
2ko	0	120	0				1	100
2ko	5	120	0				1	100
2ko	7	120	0				1	100
2ko	9	120	0	0			1	100
2ko	13	115	5	5			0.958333	95.8333
2ko	15	108	12	7			0.9	90
2ko	17	93	27	15			0.775	77.5
2ko	20	78	42	15			0.65	65
2ko	22	47	73	31			0.391667	39.1667
2ko	24	21	99	26			0.175	17.5
2ko	27	12	108	9			0.1	10
2ko	29	5	115	7			0.0416667	4.16667
2ko	31	0	120	5			0	0
2ko	34	0	120				0	0
2ko	36	0	120				0	0
2ko	38	0	120				0	0
2ko	41	0	120				0	0
2ko	43	0	120				0	0
2ko	45	0	120				0	0
4o2k 2	0	120	0				1	100
4o2k 2	5	120	0				1	100
4o2k 2	7	120	0				1	100
4o2k 2	9	120	0	0			1	100
4o2k 2	13	119	1	1			0.991667	99.1667
4o2k 2	15	114	6	5			0.95	95
4o2k 2	17	108	12	6			0.9	90
4o2k 2	20	97	23	11			0.808333	80.8333
4o2k 2	22	78	42	19			0.65	65
4o2k 2	24	52	68	26			0.433333	43.3333
4o2k 2	27	30	90	22			0.25	25
4o2k 2	29	22	98	8			0.183333	18.3333
4o2k 2	31	14	106	8			0.116667	11.6667
4o2k 2	34	7	113	7			0.0583333	5.83333
4o2k 2	36	2	118	5			0.0166667	1.66667
4o2k 2	38	0	120	2			0	0
4o2k 2	41	0	120				0	0
4o2k 2	43	0	120				0	0
4o2k 2	45	0	120				0	0
4o2k 8	0	115	0				1	100
4o2k 8	5	115	0				1	100
4o2k 8	7	115	0				1	100
4o2k 8	9	115	0	0			1	100
4o2k 8	13	113	2	2			0.982609	98.2609
4o2k 8	15	112	3	1			0.973913	97.3913
4o2k 8	17	105	10	7			0.913043	91.3043
4o2k 8	20	96	19	9			0.834783	83.4783
4o2k 8	22	82	33	14			0.713043	71.3043
4o2k 8	24	63	52	19			0.547826	54.7826
4o2k 8	27	40	75	23			0.347826	34.7826
4o2k 8	29	24	91	16			0.208696	20.8696
4o2k 8	31	11	104	13			0.0956522	9.56522
4o2k 8	34	7	108	4			0.0608696	6.08696
4o2k 8	36	1	114	6			0.00869565	0.869565
4o2k 8	38	0	115	1			0	0
4o2k 8	41	0	115				0	0
4o2k 8	43	0	115				0	0
4o2k 8	45	0	115				0	0

## Sheet: stats
% WT [115]						condition	chi	pvalue	corrected_pvalue
#days	dead	censored				WT v.s. fmo-4 OE	37.33	0	0
0						WT v.s. fmo-2KO	0.25	0.6184	1
5						WT v.s. fmo-4O;2K	22.38	2.2e-06	9e-06
7						WT v.s. fmo-4O;2K 8	37.06	0	0
9	0					fmo-4 OE v.s. WT	37.33	0	0
13	3					fmo-4 OE v.s. fmo-2KO	39.5	0	0
15	6					fmo-4 OE v.s. fmo-4O;2K	1.07	0.302	1
17	11					fmo-4 OE v.s. fmo-4O;2K 8	0.01	0.91	1
20	16					fmo-2KO v.s. WT	0.25	0.6184	1
22	25					fmo-2KO v.s. fmo-4 OE	39.5	0	0
24	29					fmo-2KO v.s. fmo-4O;2K	26.24	3e-07	1.2e-06
27	19					fmo-2KO v.s. fmo-4O;2K 8	38.6	0	0
29	3					fmo-4O;2K v.s. WT	22.38	2.2e-06	9e-06
31	3					fmo-4O;2K v.s. fmo-4 OE	1.07	0.302	1
34						fmo-4O;2K v.s. fmo-2KO	26.24	3e-07	1.2e-06
36						fmo-4O;2K v.s. fmo-4O;2K 8	0.84	0.3608	1
38						fmo-4O;2K 8 v.s. WT	37.06	0	0
41						fmo-4O;2K 8 v.s. fmo-4 OE	0.01	0.91	1
43						fmo-4O;2K 8 v.s. fmo-2KO	38.6	0	0
45						fmo-4O;2K 8 v.s. fmo-4O;2K	0.84	0.3608	1
% fmo-4 OE [118]
#days	dead	censored
0
5
7
9	0
13	1
15	4
17	4
20	10
22	16
24	18
27	26
29	15
31	9
34	8
36	5
38	2
41
43
45
% fmo-2KO [120]
#days	dead	censored
0
5
7
9	0
13	5
15	7
17	15
20	15
22	31
24	26
27	9
29	7
31	5
34
36
38
41
43
45
% fmo-4O;2K [120]
#days	dead	censored
0
5
7
9	0
13	1
15	5
17	6
20	11
22	19
24	26
27	22
29	8
31	8
34	7
36	5
38	2
41
43
45
% fmo-4O;2K 8 [115]
#days	dead	censored
0
5
7
9	0
13	2
15	1
17	7
20	9
22	14
24	19
27	23
29	16
31	13
34	4
36	6
38	1
41
43
45

## Sheet: stats atf-6
% WT EV [119]							condition	chi	pvalue	corrected_pvalue
#days	dead	censored					WT EV v.s. WT atf6	34.18	5e-09	4.5e-08
0							WT EV v.s. C9 atf6	45.08	0	0
5							WT EV v.s. fmo2 atf6	0.15	0.6982	1
7							WT EV v.s. 4OE atf6	6.51	0.0107	0.0964
9	0						WT EV v.s. 4KO atf6	0.77	0.3791	1
13	1						WT EV v.s. fmo-2 OE EV	49.67	0	0
15	4						WT EV v.s. fmo-4 OE EV	53.7	0	0
17	7						WT EV v.s. fmo-4 KO EV	2.67	0.1022	0.9196
20	13						WT EV v.s. fmo-2 KO EV	0.01	0.9183	1
22	12						WT atf6 v.s. WT EV	34.18	5e-09	4.5e-08
24	31						WT atf6 v.s. C9 atf6	1.23	0.2673	1
27	34						WT atf6 v.s. fmo2 atf6	21.42	3.7e-06	3.3e-05
29	9						WT atf6 v.s. 4OE atf6	4.31	0.038	0.3417
31	8						WT atf6 v.s. 4KO atf6	23.22	1.4e-06	1.3e-05
34							WT atf6 v.s. fmo-2 OE EV	2.39	0.1221	1
36							WT atf6 v.s. fmo-4 OE EV	2.94	0.0866	0.7798
38							WT atf6 v.s. fmo-4 KO EV	44.29	0	0
41							WT atf6 v.s. fmo-2 KO EV	28.57	9e-08	8.1e-07
43							C9 atf6 v.s. WT EV	45.08	0	0
45							C9 atf6 v.s. WT atf6	1.23	0.2673	1
							C9 atf6 v.s. fmo2 atf6	28.92	7.5e-08	6.8e-07
% WT atf6 [105]							C9 atf6 v.s. 4OE atf6	8.48	0.0036	0.0324
#days	dead	censored					C9 atf6 v.s. 4KO atf6	31.98	1.6e-08	1.4e-07
0							C9 atf6 v.s. fmo-2 OE EV	0.21	0.6445	1
5							C9 atf6 v.s. fmo-4 OE EV	0.31	0.5776	1
7							C9 atf6 v.s. fmo-4 KO EV	55.08	0	0
9	0						C9 atf6 v.s. fmo-2 KO EV	37.13	0	0
13	0						fmo2 atf6 v.s. WT EV	0.15	0.6982	1
15	0						fmo2 atf6 v.s. WT atf6	21.42	3.7e-06	3.3e-05
17	3						fmo2 atf6 v.s. C9 atf6	28.92	7.5e-08	6.8e-07
20	7						fmo2 atf6 v.s. 4OE atf6	3.31	0.0687	0.6187
22	8						fmo2 atf6 v.s. 4KO atf6	0.14	0.704	1
24	18						fmo2 atf6 v.s. fmo-2 OE EV	32.35	1.3e-08	1.2e-07
27	17						fmo2 atf6 v.s. fmo-4 OE EV	35.46	2.6e-09	2.4e-08
29	21						fmo2 atf6 v.s. fmo-4 KO EV	2.99	0.0836	0.752
31	13						fmo2 atf6 v.s. fmo-2 KO EV	0.15	0.7008	1
34	15						4OE atf6 v.s. WT EV	6.51	0.0107	0.0964
36	2						4OE atf6 v.s. WT atf6	4.31	0.038	0.3417
38	1						4OE atf6 v.s. C9 atf6	8.48	0.0036	0.0324
41							4OE atf6 v.s. fmo2 atf6	3.31	0.0687	0.6187
43							4OE atf6 v.s. 4KO atf6	3.3	0.0694	0.6243
45							4OE atf6 v.s. fmo-2 OE EV	10.87	0.001	0.0088
							4OE atf6 v.s. fmo-4 OE EV	11.57	0.0007	0.006
							4OE atf6 v.s. fmo-4 KO EV	11.22	0.0008	0.0073
% C9 atf6 [114]							4OE atf6 v.s. fmo-2 KO EV	5.37	0.0205	0.1849
#days	dead	censored					4KO atf6 v.s. WT EV	0.77	0.3791	1
0							4KO atf6 v.s. WT atf6	23.22	1.4e-06	1.3e-05
5							4KO atf6 v.s. C9 atf6	31.98	1.6e-08	1.4e-07
7							4KO atf6 v.s. fmo2 atf6	0.14	0.704	1
9	0						4KO atf6 v.s. 4OE atf6	3.3	0.0694	0.6243
13	2						4KO atf6 v.s. fmo-2 OE EV	35.51	2.6e-09	2.3e-08
15	1						4KO atf6 v.s. fmo-4 OE EV	39.59	0	0
17	4						4KO atf6 v.s. fmo-4 KO EV	5.58	0.0182	0.1639
20	6						4KO atf6 v.s. fmo-2 KO EV	0.59	0.4429	1
22	7						fmo-2 OE EV v.s. WT EV	49.67	0	0
24	14						fmo-2 OE EV v.s. WT atf6	2.39	0.1221	1
27	15						fmo-2 OE EV v.s. C9 atf6	0.21	0.6445	1
29	27						fmo-2 OE EV v.s. fmo2 atf6	32.35	1.3e-08	1.2e-07
31	15						fmo-2 OE EV v.s. 4OE atf6	10.87	0.001	0.0088
34	16						fmo-2 OE EV v.s. 4KO atf6	35.51	2.6e-09	2.3e-08
36	2						fmo-2 OE EV v.s. fmo-4 OE EV	0.01	0.9312	1
38	5						fmo-2 OE EV v.s. fmo-4 KO EV	59.81	0	0
41							fmo-2 OE EV v.s. fmo-2 KO EV	40.57	0	0
43							fmo-4 OE EV v.s. WT EV	53.7	0	0
45							fmo-4 OE EV v.s. WT atf6	2.94	0.0866	0.7798
							fmo-4 OE EV v.s. C9 atf6	0.31	0.5776	1
							fmo-4 OE EV v.s. fmo2 atf6	35.46	2.6e-09	2.4e-08
							fmo-4 OE EV v.s. 4OE atf6	11.57	0.0007	0.006
% fmo2 atf6 [68]							fmo-4 OE EV v.s. 4KO atf6	39.59	0	0
#days	dead	censored					fmo-4 OE EV v.s. fmo-2 OE EV	0.01	0.9312	1
0							fmo-4 OE EV v.s. fmo-4 KO EV	64.02	0	0
5							fmo-4 OE EV v.s. fmo-2 KO EV	44.86	0	0
7							fmo-4 KO EV v.s. WT EV	2.67	0.1022	0.9196
9	0						fmo-4 KO EV v.s. WT atf6	44.29	0	0
13	3						fmo-4 KO EV v.s. C9 atf6	55.08	0	0
15	2						fmo-4 KO EV v.s. fmo2 atf6	2.99	0.0836	0.752
17	3						fmo-4 KO EV v.s. 4OE atf6	11.22	0.0008	0.0073
20	5						fmo-4 KO EV v.s. 4KO atf6	5.58	0.0182	0.1639
22	9						fmo-4 KO EV v.s. fmo-2 OE EV	59.81	0	0
24	16						fmo-4 KO EV v.s. fmo-4 OE EV	64.02	0	0
27	15						fmo-4 KO EV v.s. fmo-2 KO EV	1.89	0.1691	1
29	12						fmo-2 KO EV v.s. WT EV	0.01	0.9183	1
31	2						fmo-2 KO EV v.s. WT atf6	28.57	9e-08	8.1e-07
34	1						fmo-2 KO EV v.s. C9 atf6	37.13	0	0
36							fmo-2 KO EV v.s. fmo2 atf6	0.15	0.7008	1
38							fmo-2 KO EV v.s. 4OE atf6	5.37	0.0205	0.1849
41							fmo-2 KO EV v.s. 4KO atf6	0.59	0.4429	1
43							fmo-2 KO EV v.s. fmo-2 OE EV	40.57	0	0
45							fmo-2 KO EV v.s. fmo-4 OE EV	44.86	0	0
							fmo-2 KO EV v.s. fmo-4 KO EV	1.89	0.1691	1
% 4OE atf6 [69]
#days	dead	censored
0
5
7
9	0
13	3
15	1
17	9
20	4
22	6
24	10
27	14
29	9
31	4
34	8
36	0
38	1
41
43
45
% 4KO atf6 [89]
#days	dead	censored
0
5
7
9	0
13	3
15	3
17	7
20	4
22	8
24	20
27	22
29	18
31	4
34
36
38
41
43
45
% fmo-2 OE EV [112]
#days	dead	censored
0
5
7
9	0
13	1
15	1
17	4
20	6
22	6
24	11
27	19
29	25
31	15
34	14
36	6
38	2
41	0
43	2
45
% fmo-4 OE EV [117]
#days	dead	censored
0
5
7
9	0
13	2
15	2
17	4
20	5
22	6
24	13
27	14
29	26
31	19
34	17
36	4
38	5
41
43
45
% fmo-4 KO EV [100]
#days	dead	censored
0
5
7
9	0
13	4
15	7
17	5
20	13
22	10
24	27
27	21
29	11
31	2
34
36
38
41
43
45
% fmo-2 KO EV [86]
#days	dead	censored
0
5
7
9	0
13	3
15	5
17	9
20	8
22	10
24	14
27	15
29	19
31	3
34
36
38
41
43
45

## Sheet: stats atf-4
% WT EV [119]								condition	chi	pvalue	corrected_pvalue
#days	dead	censored						WT EV v.s. WT atf4	12.96	0.0003	0.0029	****
0								WT EV v.s. C9 atf4	42.64	0	0	****
5								WT EV v.s. fmo2 atf4	0.68	0.4106	1	NS
7								WT EV v.s. 4OE atf4	39.94	0	0	****
9	0							WT EV v.s. 4KO atf4	0.12	0.7286	1	NS
13	1							WT EV v.s. fmo-2 OE EV	49.67	0	0	****
15	4							WT EV v.s. fmo-4 OE EV	53.7	0	0	****
17	7							WT EV v.s. fmo-4 KO EV	2.67	0.1022	0.9196
20	13							WT EV v.s. fmo-2 KO EV	0.01	0.9183	1
22	12							WT atf4 v.s. WT EV	12.96	0.0003	0.0029
24	31							WT atf4 v.s. C9 atf4	19.14	1.2e-05	0.0001
27	34							WT atf4 v.s. fmo2 atf4	17.05	3.6e-05	0.0003
29	9							WT atf4 v.s. 4OE atf4	10.92	0.001	0.0086
31	8							WT atf4 v.s. 4KO atf4	9.11	0.0025	0.0228
34								WT atf4 v.s. fmo-2 OE EV	22.68	1.9e-06	1.7e-05
36								WT atf4 v.s. fmo-4 OE EV	27.03	2e-07	1.8e-06
38								WT atf4 v.s. fmo-4 KO EV	25.49	4.4e-07	4e-06
41								WT atf4 v.s. fmo-2 KO EV	10.21	0.0014	0.0126
43								C9 atf4 v.s. WT EV	42.64	0	0
45								C9 atf4 v.s. WT atf4	19.14	1.2e-05	0.0001
								C9 atf4 v.s. fmo2 atf4	40.62	0	0
% WT atf4 [115]								C9 atf4 v.s. 4OE atf4	3.01	0.0826	0.7435
#days	dead	censored						C9 atf4 v.s. 4KO atf4	34.45	4.4e-09	3.9e-08
0								C9 atf4 v.s. fmo-2 OE EV	0.39	0.5315	1
5								C9 atf4 v.s. fmo-4 OE EV	0.64	0.4252	1
7								C9 atf4 v.s. fmo-4 KO EV	53.23	0	0
9	0							C9 atf4 v.s. fmo-2 KO EV	36.3	0	0
13	1							fmo2 atf4 v.s. WT EV	0.68	0.4106	1
15	4							fmo2 atf4 v.s. WT atf4	17.05	3.6e-05	0.0003
17	1							fmo2 atf4 v.s. C9 atf4	40.62	0	0
20	5							fmo2 atf4 v.s. 4OE atf4	40.58	0	0
22	8							fmo2 atf4 v.s. 4KO atf4	0.14	0.7086	1
24	26							fmo2 atf4 v.s. fmo-2 OE EV	46.4	0	0
27	24							fmo2 atf4 v.s. fmo-4 OE EV	49.75	0	0
29	36							fmo2 atf4 v.s. fmo-4 KO EV	0.53	0.4661	1
31	10							fmo2 atf4 v.s. fmo-2 KO EV	0.42	0.5179	1
34								4OE atf4 v.s. WT EV	39.94	0	0
36								4OE atf4 v.s. WT atf4	10.92	0.001	0.0086
38								4OE atf4 v.s. C9 atf4	3.01	0.0826	0.7435
41								4OE atf4 v.s. fmo2 atf4	40.58	0	0
43								4OE atf4 v.s. 4KO atf4	29.87	4.6e-08	4.2e-07
45								4OE atf4 v.s. fmo-2 OE EV	4.87	0.0274	0.2463
								4OE atf4 v.s. fmo-4 OE EV	6.53	0.0106	0.0952
								4OE atf4 v.s. fmo-4 KO EV	53.4	0	0
% C9 atf4 [109]								4OE atf4 v.s. fmo-2 KO EV	31	2.6e-08	2.3e-07
#days	dead	censored						4KO atf4 v.s. WT EV	0.12	0.7286	1
0								4KO atf4 v.s. WT atf4	9.11	0.0025	0.0228
5								4KO atf4 v.s. C9 atf4	34.45	4.4e-09	3.9e-08
7								4KO atf4 v.s. fmo2 atf4	0.14	0.7086	1
9	0							4KO atf4 v.s. 4OE atf4	29.87	4.6e-08	4.2e-07
13	0							4KO atf4 v.s. fmo-2 OE EV	39.7	0	0
15	3							4KO atf4 v.s. fmo-4 OE EV	43.09	0	0
17	5							4KO atf4 v.s. fmo-4 KO EV	1.11	0.2925	1
20	5							4KO atf4 v.s. fmo-2 KO EV	0.01	0.9399	1
22	7							fmo-2 OE EV v.s. WT EV	49.67	0	0
24	14							fmo-2 OE EV v.s. WT atf4	22.68	1.9e-06	1.7e-05
27	12							fmo-2 OE EV v.s. C9 atf4	0.39	0.5315	1
29	25							fmo-2 OE EV v.s. fmo2 atf4	46.4	0	0
31	19							fmo-2 OE EV v.s. 4OE atf4	4.87	0.0274	0.2463
34	10							fmo-2 OE EV v.s. 4KO atf4	39.7	0	0
36	7							fmo-2 OE EV v.s. fmo-4 OE EV	0.01	0.9312	1
38	2							fmo-2 OE EV v.s. fmo-4 KO EV	59.81	0	0
41								fmo-2 OE EV v.s. fmo-2 KO EV	40.57	0	0
43								fmo-4 OE EV v.s. WT EV	53.7	0	0
45								fmo-4 OE EV v.s. WT atf4	27.03	2e-07	1.8e-06
								fmo-4 OE EV v.s. C9 atf4	0.64	0.4252	1
								fmo-4 OE EV v.s. fmo2 atf4	49.75	0	0
								fmo-4 OE EV v.s. 4OE atf4	6.53	0.0106	0.0952
% fmo2 atf4 [77]								fmo-4 OE EV v.s. 4KO atf4	43.09	0	0
#days	dead	censored						fmo-4 OE EV v.s. fmo-2 OE EV	0.01	0.9312	1
0								fmo-4 OE EV v.s. fmo-4 KO EV	64.02	0	0
5								fmo-4 OE EV v.s. fmo-2 KO EV	44.86	0	0
7								fmo-4 KO EV v.s. WT EV	2.67	0.1022	0.9196
9	0							fmo-4 KO EV v.s. WT atf4	25.49	4.4e-07	4e-06
13	0							fmo-4 KO EV v.s. C9 atf4	53.23	0	0
15	7							fmo-4 KO EV v.s. fmo2 atf4	0.53	0.4661	1
17	2							fmo-4 KO EV v.s. 4OE atf4	53.4	0	0
20	5							fmo-4 KO EV v.s. 4KO atf4	1.11	0.2925	1
22	10							fmo-4 KO EV v.s. fmo-2 OE EV	59.81	0	0
24	26							fmo-4 KO EV v.s. fmo-4 OE EV	64.02	0	0
27	16							fmo-4 KO EV v.s. fmo-2 KO EV	1.89	0.1691	1
29	9							fmo-2 KO EV v.s. WT EV	0.01	0.9183	1
31	2							fmo-2 KO EV v.s. WT atf4	10.21	0.0014	0.0126
34								fmo-2 KO EV v.s. C9 atf4	36.3	0	0
36								fmo-2 KO EV v.s. fmo2 atf4	0.42	0.5179	1	NS
38								fmo-2 KO EV v.s. 4OE atf4	31	2.6e-08	2.3e-07
41								fmo-2 KO EV v.s. 4KO atf4	0.01	0.9399	1
43								fmo-2 KO EV v.s. fmo-2 OE EV	40.57	0	0
45								fmo-2 KO EV v.s. fmo-4 OE EV	44.86	0	0
								fmo-2 KO EV v.s. fmo-4 KO EV	1.89	0.1691	1
% 4OE atf4 [121]
#days	dead	censored
0
5
7
9	0
13	0
15	4
17	1
20	4
22	7
24	14
27	29
29	35
31	15
34	9
36	3
38
41
43
45
% 4KO atf4 [82]
#days	dead	censored
0
5
7
9	0
13	7
15	6
17	5
20	12
22	5
24	15
27	14
29	10
31	8
34
36
38
41
43
45
% fmo-2 OE EV [112]
#days	dead	censored
0
5
7
9	0
13	1
15	1
17	4
20	6
22	6
24	11
27	19
29	25
31	15
34	14
36	6
38	2
41	0
43	2
45
% fmo-4 OE EV [117]
#days	dead	censored
0
5
7
9	0
13	2
15	2
17	4
20	5
22	6
24	13
27	14
29	26
31	19
34	17
36	4
38	5
41
43
45
% fmo-4 KO EV [100]
#days	dead	censored
0
5
7
9	0
13	4
15	7
17	5
20	13
22	10
24	27
27	21
29	11
31	2
34
36
38
41
43
45
% fmo-2 KO EV [86]
#days	dead	censored
0
5
7
9	0
13	3
15	5
17	9
20	8
22	10
24	14
27	15
29	19
31	3
34
36
38
41
43
45

## Sheet: Sheet1
#1	N2								#1	N2					#1	N2
#2	Lei42	fmo-2p::MC; unc-119p::HIF-1(P621A); JT307 #1							#2	Lei42	fmo-2p::MC; unc-119p::HIF-1(P621A); JT307 #1				#11L	Lei51	fmo-2p::MC; JT307; gcy-31; gcy-36 - XA2262 sibling #1
#3	Lei43	fmo-2p::MC; unc-119p::HIF-1(P621A); JT307 #2							#3	Lei43	fmo-2p::MC; unc-119p::HIF-1(P621A); JT307 #2				#12L	Lei52	fmo-2p::MC; JT307; gcy-33; gcy-36 - XA2262 sibling #1
#4	Lei44	fmo-2p::MC; TU3311; CB5602 #1							#4	Lei44	fmo-2p::MC; TU3311; CB5602 #1				#13	Lei53	fmo-2p::MC; JT307; gcy-33; gcy-36 - XA2262 sibling #2
#5	Lei45	fmo-2p::MC; TU3311 #1							#5	Lei45	fmo-2p::MC; TU3311 #1				#14L	Lei55	fmo-2p::MC; JT307 - XA2262 sibling #1
#6	Lei46	fmo-2p::MC; CB5602 #1							#6	Lei46	fmo-2p::MC; CB5602 #1				#15L	Lei56	fmo-2p::MC; JT307 - XA2262 sibling #2
#7	Lei47	fmo-2p::MC; TU3311; CB5602 #2							#7	Lei47	fmo-2p::MC; TU3311; CB5602 #2				#16	Lei57	fmo-2p::MC - XA2262 sibling #1
#8L	Lei48	fmo-2p::MC; JT307; XA2262 #1													#17	Lei58	fmo-2p::MC - XA2262 sibling #2
#9	Lei49	fmo-2p::MC; JT307; XA2262 #2													#18	Lei59	fmo-2p::MC; gcy-33; gcy-36 - XA2262 sibling #1
#10L	Lei50	fmo-2p::MC; JT307; XA2262 #3							#1	N2					#19	Lei60	fmo-2p::MC; gcy-33; gcy-36 - XA2262 sibling #2
#11L	Lei51	fmo-2p::MC; JT307; gcy-31; gcy-36 - XA2262 sibling #1							#8L	Lei48	fmo-2p::MC; JT307; XA2262 #1
#12L	Lei52	fmo-2p::MC; JT307; gcy-33; gcy-36 - XA2262 sibling #1							#9	Lei49	fmo-2p::MC; JT307; XA2262 #2
#13	Lei53	fmo-2p::MC; JT307; gcy-33; gcy-36 - XA2262 sibling #2							#10L	Lei50	fmo-2p::MC; JT307; XA2262 #3
#14L	Lei55	fmo-2p::MC; JT307 - XA2262 sibling #1							#14L	Lei55	fmo-2p::MC; JT307 - XA2262 sibling #1
#15L	Lei56	fmo-2p::MC; JT307 - XA2262 sibling #2							#15L	Lei56	fmo-2p::MC; JT307 - XA2262 sibling #2
#16	Lei57	fmo-2p::MC - XA2262 sibling #1							#16	Lei57	fmo-2p::MC - XA2262 sibling #1
#17	Lei58	fmo-2p::MC - XA2262 sibling #2							#17	Lei58	fmo-2p::MC - XA2262 sibling #2
#18	Lei59	fmo-2p::MC; gcy-33; gcy-36 - XA2262 sibling #1							#20	Lei61	fmo-2p::MC; XA2262 #1
#19	Lei60	fmo-2p::MC; gcy-33; gcy-36 - XA2262 sibling #2							#21	Lei62	fmo-2p::MC; XA2262 #2
#20	Lei61	fmo-2p::MC; XA2262 #1
#21	Lei62	fmo-2p::MC; XA2262 #2
