# Supplementary material for: fmo-4 promotes longevity and stress resistance via ER to mitochondria calcium regulation in C. elegans
Source: eLife journal article supplement (doi:10.7554/elife.99971), 2024-08-27
Supplement: fig3-figsupp3-data1 [file elife-99971-fig3-figsupp3-data1-v1.zip]

## Sheet: lifespan
strain	day	alive	dead-total	dead-normal	dead-ruptured	censored	ratio-alive	percentage-alive
N2 EV	0	96	0				1	100
N2 EV	5	96	0				1	100
N2 EV	7	96	0				1	100						1	2	3	4	5	6	7	8	9	10	11	12	13	14	15
N2 EV	10	96	0	0			1	100			plot data here-->		day	Wild-Type	FMO-4 OE	FMO-2 KO	FMO-4OE;2KO	fmo-4O;2K 8
N2 EV	12	90	6	6			0.9375	93.75				0	0	100	100	100	100	100
N2 EV	14	85	11	5			0.885417	88.5417				5	5	100	100	100	100	100
N2 EV	17	78	18	7			0.8125	81.25				7	7	100	100	100	100	100
N2 EV	19	63	33	15			0.65625	65.625				10	10	100	100	100	100	100
N2 EV	21	46	50	17			0.479167	47.9167				12	12	93.75	97.9381	93	98.0769	99.0196
N2 EV	24	18	78	28			0.1875	18.75				14	14	88.5417	96.9072	90	97.1154	98.0392
N2 EV	26	3	93	15			0.03125	3.125				17	17	81.25	93.8144	80	93.2692	93.1373
N2 EV	28	2	94	1			0.0208333	2.08333				19	19	65.625	85.567	63	84.6154	87.2549
N2 EV	31	0	96	2			0	0				21	21	47.9167	72.1649	42	71.1538	76.4706
N2 EV	33	0	96				0	0				24	24	18.75	54.6392	20	49.0385	57.8431
N2 EV	35	0	96				0	0				26	26	3.125	41.2371	10	32.6923	39.2157
N2 EV	38	0	96				0	0				28	28	2.08333	30.9278	4	21.1538	31.3725
N2 EV	40	0	96				0	0				31	31	0	24.7423	0	11.5385	17.6471
N2 EV	42	0	96				0	0				33	33		4.12371		3.84615	5.88235
N2 EV	45	0	96				0	0				35	35		0		0	0
												38	38
4oe	0	97	0				1	100				40	40
4oe	5	97	0				1	100				42	42
4oe	7	97	0				1	100				45	45
4oe	9	97	0	0			1	100
4oe	13	95	2	2			0.979381	97.9381
4oe	15	94	3	1			0.969072	96.9072
4oe	17	91	6	3			0.938144	93.8144
4oe	20	83	14	8			0.85567	85.567
4oe	22	70	27	13			0.721649	72.1649
4oe	24	53	44	17			0.546392	54.6392
4oe	27	40	57	13			0.412371	41.2371
4oe	29	30	67	10			0.309278	30.9278
4oe	31	24	73	6			0.247423	24.7423
4oe	34	4	93	20			0.0412371	4.12371
4oe	36	0	97	4			0	0
4oe	38	0	97				0	0
4oe	41	0	97				0	0
4oe	43	0	97				0	0
4oe	45	0	97				0	0
2ko	0	100	0				1	100
2ko	5	100	0				1	100
2ko	7	100	0				1	100
2ko	9	100	0	0			1	100
2ko	13	93	7	7			0.93	93
2ko	15	90	10	3			0.9	90
2ko	17	80	20	10			0.8	80
2ko	20	63	37	17			0.63	63
2ko	22	42	58	21			0.42	42
2ko	24	20	80	22			0.2	20
2ko	27	10	90	10			0.1	10
2ko	29	4	96	6			0.04	4
2ko	31	0	100	4			0	0
2ko	34	0	100				0	0
2ko	36	0	100				0	0
2ko	38	0	100				0	0
2ko	41	0	100				0	0
2ko	43	0	100				0	0
2ko	45	0	100				0	0
4o2k 2	0	104	0				1	100
4o2k 2	5	104	0				1	100
4o2k 2	7	104	0				1	100
4o2k 2	9	104	0	0			1	100
4o2k 2	13	102	2	2			0.980769	98.0769
4o2k 2	15	101	3	1			0.971154	97.1154
4o2k 2	17	97	7	4			0.932692	93.2692
4o2k 2	20	88	16	9			0.846154	84.6154
4o2k 2	22	74	30	14			0.711538	71.1538
4o2k 2	24	51	53	23			0.490385	49.0385
4o2k 2	27	34	70	17			0.326923	32.6923
4o2k 2	29	22	82	12			0.211538	21.1538
4o2k 2	31	12	92	10			0.115385	11.5385
4o2k 2	34	4	100	8			0.0384615	3.84615
4o2k 2	36	0	104	4			0	0
4o2k 2	38	0	104				0	0
4o2k 2	41	0	104				0	0
4o2k 2	43	0	104				0	0
4o2k 2	45	0	104				0	0
4o2k 8	0	102	0				1	100
4o2k 8	5	102	0				1	100
4o2k 8	7	102	0				1	100
4o2k 8	9	102	0	0			1	100
4o2k 8	13	101	1	1			0.990196	99.0196
4o2k 8	15	100	2	1			0.980392	98.0392
4o2k 8	17	95	7	5			0.931373	93.1373
4o2k 8	20	89	13	6			0.872549	87.2549
4o2k 8	22	78	24	11			0.764706	76.4706
4o2k 8	24	59	43	19			0.578431	57.8431
4o2k 8	27	40	62	19			0.392157	39.2157
4o2k 8	29	32	70	8			0.313725	31.3725
4o2k 8	31	18	84	14			0.176471	17.6471
4o2k 8	34	6	96	12			0.0588235	5.88235
4o2k 8	36	0	102	6			0	0
4o2k 8	38	0	102				0	0
4o2k 8	41	0	102				0	0
4o2k 8	43	0	102				0	0
4o2k 8	45	0	102				0	0
2O4K EV	0	125	0				1	100
2O4K EV	5	125	0				1	100
2O4K EV	7	125	0				1	100
2O4K EV	9	125	0				1	100
2O4K EV	13	125	0				1	100
2O4K EV	15	125	0				1	100
2O4K EV	17	125	0				1	100
2O4K EV	20	125	0				1	100
2O4K EV	22	125	0				1	100
2O4K EV	24	125	0				1	100
2O4K EV	27	125	0				1	100
2O4K EV	29	125	0				1	100
2O4K EV	31	125	0				1	100
2O4K EV	34	125	0				1	100
2O4K EV	36	125	0				1	100
2O4K EV	38	125	0				1	100
2O4K EV	41	125	0				1	100
2O4K EV	43	125	0				1	100
2O4K EV	45	125	0				1	100
N2 atf-4	0	115	0				1	100
N2 atf-4	5	115	0				1	100
N2 atf-4	7	115	0				1	100
N2 atf-4	9	115	0				1	100
N2 atf-4	13	115	0				1	100
N2 atf-4	15	115	0				1	100
N2 atf-4	17	115	0				1	100
N2 atf-4	20	115	0				1	100
N2 atf-4	22	115	0				1	100
N2 atf-4	24	115	0				1	100
N2 atf-4	27	115	0				1	100
N2 atf-4	29	115	0				1	100
N2 atf-4	31	115	0				1	100
N2 atf-4	34	115	0				1	100
N2 atf-4	36	115	0				1	100
N2 atf-4	38	115	0				1	100
N2 atf-4	41	115	0				1	100
N2 atf-4	43	115	0				1	100
N2 atf-4	45	115	0				1	100
C9 atf-4	0	109	0				1	100
C9 atf-4	5	109	0				1	100
C9 atf-4	7	109	0				1	100
C9 atf-4	9	109	0				1	100
C9 atf-4	13	109	0				1	100
C9 atf-4	15	109	0				1	100
C9 atf-4	17	109	0				1	100
C9 atf-4	20	109	0				1	100
C9 atf-4	22	109	0				1	100
C9 atf-4	24	109	0				1	100
C9 atf-4	27	109	0				1	100
C9 atf-4	29	109	0				1	100
C9 atf-4	31	109	0				1	100
C9 atf-4	34	109	0				1	100
C9 atf-4	36	109	0				1	100
C9 atf-4	38	109	0				1	100
C9 atf-4	41	109	0				1	100
C9 atf-4	43	109	0				1	100
C9 atf-4	45
fmo2 atf-4	0	77	0				1	100
fmo2 atf-4	5	77	0				1	100
fmo2 atf-4	7	77	0				1	100
fmo2 atf-4	9	77	0				1	100
fmo2 atf-4	13	77	0				1	100
fmo2 atf-4	15	77	0				1	100
fmo2 atf-4	17	77	0				1	100
fmo2 atf-4	20	77	0				1	100
fmo2 atf-4	22	77	0				1	100
fmo2 atf-4	24	77	0				1	100
fmo2 atf-4	27	77	0				1	100
fmo2 atf-4	29	77	0				1	100
fmo2 atf-4	31	77	0				1	100
fmo2 atf-4	34	77	0				1	100
fmo2 atf-4	36	77	0				1	100
fmo2 atf-4	38	77	0				1	100
fmo2 atf-4	41	77	0				1	100
fmo2 atf-4	43	77	0				1	100
fmo2 atf-4	45	77	0				1	100
fmo2 atf-4	47	77	0				1	100
4OE atf-4	0	121	0				1	100
4OE atf-4	5	121	0				1	100
4OE atf-4	7	121	0				1	100
4OE atf-4	9	121	0				1	100
4OE atf-4	13	121	0				1	100
4OE atf-4	15	121	0				1	100
4OE atf-4	17	121	0				1	100
4OE atf-4	20	121	0				1	100
4OE atf-4	22	121	0				1	100
4OE atf-4	24	121	0				1	100
4OE atf-4	27	121	0				1	100
4OE atf-4	29	121	0				1	100
4OE atf-4	31	121	0				1	100
4OE atf-4	34	121	0				1	100
4OE atf-4	36	121	0				1	100
4OE atf-4	38	121	0				1.11009	111.009
4OE atf-4	41	121	0				1.11009	111.009
4OE atf-4	43	121	0				1.11009	111.009
	45
4KO atf-4	0	82	0				1	100
4KO atf-4	5	82	0				1	100
4KO atf-4	7	82	0				1	100
4KO atf-4	9	82	0				1	100
4KO atf-4	13	82	0				1	100
4KO atf-4	15	82	0				1	100
4KO atf-4	17	82	0				1	100
4KO atf-4	20	82	0				1	100
4KO atf-4	22	82	0				1	100
4KO atf-4	24	82	0				1	100
4KO atf-4	27	82	0				1	100
4KO atf-4	29	82	0				1	100
4KO atf-4	31	82	0				1	100
4KO atf-4	34	82	0				1	100
4KO atf-4	36	82	0				1	100
4KO atf-4	38	82	0				1	100
4KO atf-4	41	82	0				1	100
4KO atf-4	43	82	0				1	100
4KO atf-4	45
2O4K atf-4	0	115	0				1	100
2O4K atf-4	5	115	0				1	100
2O4K atf-4	7	115	0				1	100
2O4K atf-4	9	115	0				1	100
2O4K atf-4	13	115	0				1	100
2O4K atf-4	15	115	0				1	100
2O4K atf-4	17	115	0				1	100
2O4K atf-4	20	115	0				1	100
2O4K atf-4	22	115	0				1	100
2O4K atf-4	24	115	0				1	100
2O4K atf-4	27	115	0				1	100
2O4K atf-4	29	115	0				1	100
2O4K atf-4	31	115	0				1	100
2O4K atf-4	34	115	0				1	100
2O4K atf-4	36	115	0				1	100
2O4K atf-4	38	115	0				1	100
2O4K atf-4	41	115	0				1	100
2O4K atf-4	43	115	0				1	100
2O4K atf-4	45
N2 atf-6	0	105	0				1	100
N2 atf-6	5	105	0				1	100
N2 atf-6	7	105	0				1	100
N2 atf-6	9	105	0				1	100
N2 atf-6	13	105	0				1	100
N2 atf-6	15	105	0				1	100
N2 atf-6	17	105	0				1	100
N2 atf-6	20	105	0				1	100
N2 atf-6	22	105	0				1	100
N2 atf-6	24	105	0				1	100
N2 atf-6	27	105	0				1	100
N2 atf-6	29	105	0				1	100
N2 atf-6	31	105	0				1	100
N2 atf-6	34	105	0				1	100
N2 atf-6	36	105	0				1	100
N2 atf-6	38	105	0				1	100
N2 atf-6	41	105	0				1	100
N2 atf-6	43	105	0				1	100
N2 atf-6	45	105	0				1	100
C9 atf-6	0	114	0				1	100
C9 atf-6	5	114	0				1	100
C9 atf-6	7	114	0				1	100
C9 atf-6	9	114	0				1	100
C9 atf-6	13	114	0				1	100
C9 atf-6	15	114	0				1	100
C9 atf-6	17	114	0				1	100
C9 atf-6	20	114	0				1	100
C9 atf-6	22	114	0				1	100
C9 atf-6	24	114	0				1	100
C9 atf-6	27	114	0				1	100
C9 atf-6	29	114	0				1	100
C9 atf-6	31	114	0				1	100
C9 atf-6	34	114	0				1	100
C9 atf-6	36	114	0				1	100
C9 atf-6	38	114	0				1	100
C9 atf-6	41	114	0				1	100
C9 atf-6	43	114	0				1	100
C9 atf-6	45
fmo2 atf-6	0	68	0				1	100
fmo2 atf-6	5	68	0				1	100
fmo2 atf-6	7	68	0				1	100
fmo2 atf-6	9	68	0				1	100
fmo2 atf-6	13	68	0				1	100
fmo2 atf-6	15	68	0				1	100
fmo2 atf-6	17	68	0				1	100
fmo2 atf-6	20	68	0				1	100
fmo2 atf-6	22	68	0				1	100
fmo2 atf-6	24	68	0				1	100
fmo2 atf-6	27	68	0				1	100
fmo2 atf-6	29	68	0				1	100
fmo2 atf-6	31	68	0				1	100
fmo2 atf-6	34	68	0				1	100
fmo2 atf-6	36	68	0				1	100
fmo2 atf-6	38	68	0				1	100
fmo2 atf-6	41	68	0				1	100
fmo2 atf-6	43	68	0				1	100
fmo2 atf-6	45
4OE atf-6	0	69	0			0	1	100
4OE atf-6	5	69	0			0	1	100
4OE atf-6	7	69	0			0	1	100
4OE atf-6	9	69	0			0	1	100
4OE atf-6	13	69	0			0	1	100
4OE atf-6	15	69	0			0	1	100
4OE atf-6	17	69	0			0	1	100
4OE atf-6	20	69	0			0	1	100
4OE atf-6	22	69	0			0	1	100
4OE atf-6	24	69	0			0	1	100
4OE atf-6	27	69	0			0	1	100
4OE atf-6	29	69	0			0	1	100
4OE atf-6	31	69	0			0	1	100
4OE atf-6	34	69	0			0	1	100
4OE atf-6	36	69	0			0	1	100
4OE atf-6	38	69	0			0	1	100
4OE atf-6	41	69	0			0	1	100
4OE atf-6	43	69	0			0	1	100
4OE atf-6	45	69	0			0	1	100
4KO atf-6	0	89	0			0	1	100
4KO atf-6	5	89	0			0	1	100
4KO atf-6	7	89	0			0	1	100
4KO atf-6	9	89	0			0	1	100
4KO atf-6	13	89	0			0	1	100
4KO atf-6	15	89	0			0	1	100
4KO atf-6	17	89	0			0	1	100
4KO atf-6	20	89	0			0	1	100
4KO atf-6	22	89	0			0	1	100
4KO atf-6	24	89	0			0	1	100
4KO atf-6	27	89	0			0	1	100
4KO atf-6	29	89	0			0	1	100
4KO atf-6	31	89	0			0	1	100
4KO atf-6	34	89	0			0	1	100
4KO atf-6	36	89	0			0	1	100
4KO atf-6	38	89	0			0	1	100
4KO atf-6	41	89	0			0	1	100
4KO atf-6	43	89	0			0	1	100
4KO atf-6	45	89	0			0	1	100
		89
2O4K atf-6	0	87	0			0	1	100
2O4K atf-6	5	87	0			0	1	100
2O4K atf-6	7	87	0			0	1	100
2O4K atf-6	9	87	0			0	1	100
2O4K atf-6	13	87	0			0	1	100
2O4K atf-6	15	87	0			0	1	100
2O4K atf-6	17	87	0			0	1	100
2O4K atf-6	20	87	0			0	1	100
2O4K atf-6	22	87	0			0	1	100
2O4K atf-6	24	87	0			0	1	100
2O4K atf-6	27	87	0			0	1	100
2O4K atf-6	29	87	0			0	1	100
2O4K atf-6	31	87	0			0	1	100
2O4K atf-6	34	87	0			0	1	100
2O4K atf-6	36	87	0			0	1	100
2O4K atf-6	38	87	0			0	1	100
2O4K atf-6	41	87	0			0	1	100
2O4K atf-6	43	87	0			0	1	100
2O4K atf-6	45	87	0			0	1	100
							0

## Sheet: stats
% WT [96]						condition	chi	pvalue	corrected_pvalue
#days	dead	censored				WT v.s. fmo-4 OE	43.62	0	0
0						WT v.s. fmo-2KO	0.04	0.8485	1
5						WT v.s. fmo-4O;2K	33.02	9.1e-09	3.6e-08
7						WT v.s. fmo-4O;2K 8	47.94	0	0
9	0					fmo-4 OE v.s. WT	43.62	0	0
13	6					fmo-4 OE v.s. fmo-2KO	42.27	0	0
15	5					fmo-4 OE v.s. fmo-4O;2K	2.49	0.1148	0.4594
17	7					fmo-4 OE v.s. fmo-4O;2K 8	0.02	0.8795	1
20	15					fmo-2KO v.s. WT	0.04	0.8485	1
22	17					fmo-2KO v.s. fmo-4 OE	42.27	0	0
24	28					fmo-2KO v.s. fmo-4O;2K	30.05	4.2e-08	1.7e-07
27	15					fmo-2KO v.s. fmo-4O;2K 8	45.31	0	0
29	1					fmo-4O;2K v.s. WT	33.02	9.1e-09	3.6e-08
31	2					fmo-4O;2K v.s. fmo-4 OE	2.49	0.1148	0.4594
34						fmo-4O;2K v.s. fmo-2KO	30.05	4.2e-08	1.7e-07
36						fmo-4O;2K v.s. fmo-4O;2K 8	2.26	0.1327	0.5306
38						fmo-4O;2K 8 v.s. WT	47.94	0	0
41						fmo-4O;2K 8 v.s. fmo-4 OE	0.02	0.8795	1
43						fmo-4O;2K 8 v.s. fmo-2KO	45.31	0	0
45						fmo-4O;2K 8 v.s. fmo-4O;2K	2.26	0.1327	0.5306
% fmo-4 OE [97]
#days	dead	censored
0
5
7
9	0
13	2
15	1
17	3
20	8
22	13
24	17
27	13
29	10
31	6
34	20
36	4
38
41
43
45
% fmo-2KO [100]
#days	dead	censored
0
5
7
9	0
13	7
15	3
17	10
20	17
22	21
24	22
27	10
29	6
31	4
34
36
38
41
43
45
% fmo-4O;2K [104]
#days	dead	censored
0
5
7
9	0
13	2
15	1
17	4
20	9
22	14
24	23
27	17
29	12
31	10
34	8
36	4
38
41
43
45
% fmo-4O;2K 8 [102]
#days	dead	censored
0
5
7
9	0
13	1
15	1
17	5
20	6
22	11
24	19
27	19
29	8
31	14
34	12
36	6
38
41
43
45

## Sheet: stats atf-6
% WT EV [119]							condition	chi	pvalue	corrected_pvalue
#days	dead	censored					WT EV v.s. WT atf6	34.18	5e-09	4.5e-08
0							WT EV v.s. C9 atf6	45.08	0	0
5							WT EV v.s. fmo2 atf6	0.15	0.6982	1
7							WT EV v.s. 4OE atf6	6.51	0.0107	0.0964
9	0						WT EV v.s. 4KO atf6	0.77	0.3791	1
13	1						WT EV v.s. fmo-2 OE EV	49.67	0	0
15	4						WT EV v.s. fmo-4 OE EV	53.7	0	0
17	7						WT EV v.s. fmo-4 KO EV	2.67	0.1022	0.9196
20	13						WT EV v.s. fmo-2 KO EV	0.01	0.9183	1
22	12						WT atf6 v.s. WT EV	34.18	5e-09	4.5e-08
24	31						WT atf6 v.s. C9 atf6	1.23	0.2673	1
27	34						WT atf6 v.s. fmo2 atf6	21.42	3.7e-06	3.3e-05
29	9						WT atf6 v.s. 4OE atf6	4.31	0.038	0.3417
31	8						WT atf6 v.s. 4KO atf6	23.22	1.4e-06	1.3e-05
34							WT atf6 v.s. fmo-2 OE EV	2.39	0.1221	1
36							WT atf6 v.s. fmo-4 OE EV	2.94	0.0866	0.7798
38							WT atf6 v.s. fmo-4 KO EV	44.29	0	0
41							WT atf6 v.s. fmo-2 KO EV	28.57	9e-08	8.1e-07
43							C9 atf6 v.s. WT EV	45.08	0	0
45							C9 atf6 v.s. WT atf6	1.23	0.2673	1
							C9 atf6 v.s. fmo2 atf6	28.92	7.5e-08	6.8e-07
% WT atf6 [105]							C9 atf6 v.s. 4OE atf6	8.48	0.0036	0.0324
#days	dead	censored					C9 atf6 v.s. 4KO atf6	31.98	1.6e-08	1.4e-07
0							C9 atf6 v.s. fmo-2 OE EV	0.21	0.6445	1
5							C9 atf6 v.s. fmo-4 OE EV	0.31	0.5776	1
7							C9 atf6 v.s. fmo-4 KO EV	55.08	0	0
9	0						C9 atf6 v.s. fmo-2 KO EV	37.13	0	0
13	0						fmo2 atf6 v.s. WT EV	0.15	0.6982	1
15	0						fmo2 atf6 v.s. WT atf6	21.42	3.7e-06	3.3e-05
17	3						fmo2 atf6 v.s. C9 atf6	28.92	7.5e-08	6.8e-07
20	7						fmo2 atf6 v.s. 4OE atf6	3.31	0.0687	0.6187
22	8						fmo2 atf6 v.s. 4KO atf6	0.14	0.704	1
24	18						fmo2 atf6 v.s. fmo-2 OE EV	32.35	1.3e-08	1.2e-07
27	17						fmo2 atf6 v.s. fmo-4 OE EV	35.46	2.6e-09	2.4e-08
29	21						fmo2 atf6 v.s. fmo-4 KO EV	2.99	0.0836	0.752
31	13						fmo2 atf6 v.s. fmo-2 KO EV	0.15	0.7008	1
34	15						4OE atf6 v.s. WT EV	6.51	0.0107	0.0964
36	2						4OE atf6 v.s. WT atf6	4.31	0.038	0.3417
38	1						4OE atf6 v.s. C9 atf6	8.48	0.0036	0.0324
41							4OE atf6 v.s. fmo2 atf6	3.31	0.0687	0.6187
43							4OE atf6 v.s. 4KO atf6	3.3	0.0694	0.6243
45							4OE atf6 v.s. fmo-2 OE EV	10.87	0.001	0.0088
							4OE atf6 v.s. fmo-4 OE EV	11.57	0.0007	0.006
							4OE atf6 v.s. fmo-4 KO EV	11.22	0.0008	0.0073
% C9 atf6 [114]							4OE atf6 v.s. fmo-2 KO EV	5.37	0.0205	0.1849
#days	dead	censored					4KO atf6 v.s. WT EV	0.77	0.3791	1
0							4KO atf6 v.s. WT atf6	23.22	1.4e-06	1.3e-05
5							4KO atf6 v.s. C9 atf6	31.98	1.6e-08	1.4e-07
7							4KO atf6 v.s. fmo2 atf6	0.14	0.704	1
9	0						4KO atf6 v.s. 4OE atf6	3.3	0.0694	0.6243
13	2						4KO atf6 v.s. fmo-2 OE EV	35.51	2.6e-09	2.3e-08
15	1						4KO atf6 v.s. fmo-4 OE EV	39.59	0	0
17	4						4KO atf6 v.s. fmo-4 KO EV	5.58	0.0182	0.1639
20	6						4KO atf6 v.s. fmo-2 KO EV	0.59	0.4429	1
22	7						fmo-2 OE EV v.s. WT EV	49.67	0	0
24	14						fmo-2 OE EV v.s. WT atf6	2.39	0.1221	1
27	15						fmo-2 OE EV v.s. C9 atf6	0.21	0.6445	1
29	27						fmo-2 OE EV v.s. fmo2 atf6	32.35	1.3e-08	1.2e-07
31	15						fmo-2 OE EV v.s. 4OE atf6	10.87	0.001	0.0088
34	16						fmo-2 OE EV v.s. 4KO atf6	35.51	2.6e-09	2.3e-08
36	2						fmo-2 OE EV v.s. fmo-4 OE EV	0.01	0.9312	1
38	5						fmo-2 OE EV v.s. fmo-4 KO EV	59.81	0	0
41							fmo-2 OE EV v.s. fmo-2 KO EV	40.57	0	0
43							fmo-4 OE EV v.s. WT EV	53.7	0	0
45							fmo-4 OE EV v.s. WT atf6	2.94	0.0866	0.7798
							fmo-4 OE EV v.s. C9 atf6	0.31	0.5776	1
							fmo-4 OE EV v.s. fmo2 atf6	35.46	2.6e-09	2.4e-08
							fmo-4 OE EV v.s. 4OE atf6	11.57	0.0007	0.006
% fmo2 atf6 [68]							fmo-4 OE EV v.s. 4KO atf6	39.59	0	0
#days	dead	censored					fmo-4 OE EV v.s. fmo-2 OE EV	0.01	0.9312	1
0							fmo-4 OE EV v.s. fmo-4 KO EV	64.02	0	0
5							fmo-4 OE EV v.s. fmo-2 KO EV	44.86	0	0
7							fmo-4 KO EV v.s. WT EV	2.67	0.1022	0.9196
9	0						fmo-4 KO EV v.s. WT atf6	44.29	0	0
13	3						fmo-4 KO EV v.s. C9 atf6	55.08	0	0
15	2						fmo-4 KO EV v.s. fmo2 atf6	2.99	0.0836	0.752
17	3						fmo-4 KO EV v.s. 4OE atf6	11.22	0.0008	0.0073
20	5						fmo-4 KO EV v.s. 4KO atf6	5.58	0.0182	0.1639
22	9						fmo-4 KO EV v.s. fmo-2 OE EV	59.81	0	0
24	16						fmo-4 KO EV v.s. fmo-4 OE EV	64.02	0	0
27	15						fmo-4 KO EV v.s. fmo-2 KO EV	1.89	0.1691	1
29	12						fmo-2 KO EV v.s. WT EV	0.01	0.9183	1
31	2						fmo-2 KO EV v.s. WT atf6	28.57	9e-08	8.1e-07
34	1						fmo-2 KO EV v.s. C9 atf6	37.13	0	0
36							fmo-2 KO EV v.s. fmo2 atf6	0.15	0.7008	1
38							fmo-2 KO EV v.s. 4OE atf6	5.37	0.0205	0.1849
41							fmo-2 KO EV v.s. 4KO atf6	0.59	0.4429	1
43							fmo-2 KO EV v.s. fmo-2 OE EV	40.57	0	0
45							fmo-2 KO EV v.s. fmo-4 OE EV	44.86	0	0
							fmo-2 KO EV v.s. fmo-4 KO EV	1.89	0.1691	1
% 4OE atf6 [69]
#days	dead	censored
0
5
7
9	0
13	3
15	1
17	9
20	4
22	6
24	10
27	14
29	9
31	4
34	8
36	0
38	1
41
43
45
% 4KO atf6 [89]
#days	dead	censored
0
5
7
9	0
13	3
15	3
17	7
20	4
22	8
24	20
27	22
29	18
31	4
34
36
38
41
43
45
% fmo-2 OE EV [112]
#days	dead	censored
0
5
7
9	0
13	1
15	1
17	4
20	6
22	6
24	11
27	19
29	25
31	15
34	14
36	6
38	2
41	0
43	2
45
% fmo-4 OE EV [117]
#days	dead	censored
0
5
7
9	0
13	2
15	2
17	4
20	5
22	6
24	13
27	14
29	26
31	19
34	17
36	4
38	5
41
43
45
% fmo-4 KO EV [100]
#days	dead	censored
0
5
7
9	0
13	4
15	7
17	5
20	13
22	10
24	27
27	21
29	11
31	2
34
36
38
41
43
45
% fmo-2 KO EV [86]
#days	dead	censored
0
5
7
9	0
13	3
15	5
17	9
20	8
22	10
24	14
27	15
29	19
31	3
34
36
38
41
43
45

## Sheet: stats atf-4
% WT EV [119]								condition	chi	pvalue	corrected_pvalue
#days	dead	censored						WT EV v.s. WT atf4	12.96	0.0003	0.0029	****
0								WT EV v.s. C9 atf4	42.64	0	0	****
5								WT EV v.s. fmo2 atf4	0.68	0.4106	1	NS
7								WT EV v.s. 4OE atf4	39.94	0	0	****
9	0							WT EV v.s. 4KO atf4	0.12	0.7286	1	NS
13	1							WT EV v.s. fmo-2 OE EV	49.67	0	0	****
15	4							WT EV v.s. fmo-4 OE EV	53.7	0	0	****
17	7							WT EV v.s. fmo-4 KO EV	2.67	0.1022	0.9196
20	13							WT EV v.s. fmo-2 KO EV	0.01	0.9183	1
22	12							WT atf4 v.s. WT EV	12.96	0.0003	0.0029
24	31							WT atf4 v.s. C9 atf4	19.14	1.2e-05	0.0001
27	34							WT atf4 v.s. fmo2 atf4	17.05	3.6e-05	0.0003
29	9							WT atf4 v.s. 4OE atf4	10.92	0.001	0.0086
31	8							WT atf4 v.s. 4KO atf4	9.11	0.0025	0.0228
34								WT atf4 v.s. fmo-2 OE EV	22.68	1.9e-06	1.7e-05
36								WT atf4 v.s. fmo-4 OE EV	27.03	2e-07	1.8e-06
38								WT atf4 v.s. fmo-4 KO EV	25.49	4.4e-07	4e-06
41								WT atf4 v.s. fmo-2 KO EV	10.21	0.0014	0.0126
43								C9 atf4 v.s. WT EV	42.64	0	0
45								C9 atf4 v.s. WT atf4	19.14	1.2e-05	0.0001
								C9 atf4 v.s. fmo2 atf4	40.62	0	0
% WT atf4 [115]								C9 atf4 v.s. 4OE atf4	3.01	0.0826	0.7435
#days	dead	censored						C9 atf4 v.s. 4KO atf4	34.45	4.4e-09	3.9e-08
0								C9 atf4 v.s. fmo-2 OE EV	0.39	0.5315	1
5								C9 atf4 v.s. fmo-4 OE EV	0.64	0.4252	1
7								C9 atf4 v.s. fmo-4 KO EV	53.23	0	0
9	0							C9 atf4 v.s. fmo-2 KO EV	36.3	0	0
13	1							fmo2 atf4 v.s. WT EV	0.68	0.4106	1
15	4							fmo2 atf4 v.s. WT atf4	17.05	3.6e-05	0.0003
17	1							fmo2 atf4 v.s. C9 atf4	40.62	0	0
20	5							fmo2 atf4 v.s. 4OE atf4	40.58	0	0
22	8							fmo2 atf4 v.s. 4KO atf4	0.14	0.7086	1
24	26							fmo2 atf4 v.s. fmo-2 OE EV	46.4	0	0
27	24							fmo2 atf4 v.s. fmo-4 OE EV	49.75	0	0
29	36							fmo2 atf4 v.s. fmo-4 KO EV	0.53	0.4661	1
31	10							fmo2 atf4 v.s. fmo-2 KO EV	0.42	0.5179	1
34								4OE atf4 v.s. WT EV	39.94	0	0
36								4OE atf4 v.s. WT atf4	10.92	0.001	0.0086
38								4OE atf4 v.s. C9 atf4	3.01	0.0826	0.7435
41								4OE atf4 v.s. fmo2 atf4	40.58	0	0
43								4OE atf4 v.s. 4KO atf4	29.87	4.6e-08	4.2e-07
45								4OE atf4 v.s. fmo-2 OE EV	4.87	0.0274	0.2463
								4OE atf4 v.s. fmo-4 OE EV	6.53	0.0106	0.0952
								4OE atf4 v.s. fmo-4 KO EV	53.4	0	0
% C9 atf4 [109]								4OE atf4 v.s. fmo-2 KO EV	31	2.6e-08	2.3e-07
#days	dead	censored						4KO atf4 v.s. WT EV	0.12	0.7286	1
0								4KO atf4 v.s. WT atf4	9.11	0.0025	0.0228
5								4KO atf4 v.s. C9 atf4	34.45	4.4e-09	3.9e-08
7								4KO atf4 v.s. fmo2 atf4	0.14	0.7086	1
9	0							4KO atf4 v.s. 4OE atf4	29.87	4.6e-08	4.2e-07
13	0							4KO atf4 v.s. fmo-2 OE EV	39.7	0	0
15	3							4KO atf4 v.s. fmo-4 OE EV	43.09	0	0
17	5							4KO atf4 v.s. fmo-4 KO EV	1.11	0.2925	1
20	5							4KO atf4 v.s. fmo-2 KO EV	0.01	0.9399	1
22	7							fmo-2 OE EV v.s. WT EV	49.67	0	0
24	14							fmo-2 OE EV v.s. WT atf4	22.68	1.9e-06	1.7e-05
27	12							fmo-2 OE EV v.s. C9 atf4	0.39	0.5315	1
29	25							fmo-2 OE EV v.s. fmo2 atf4	46.4	0	0
31	19							fmo-2 OE EV v.s. 4OE atf4	4.87	0.0274	0.2463
34	10							fmo-2 OE EV v.s. 4KO atf4	39.7	0	0
36	7							fmo-2 OE EV v.s. fmo-4 OE EV	0.01	0.9312	1
38	2							fmo-2 OE EV v.s. fmo-4 KO EV	59.81	0	0
41								fmo-2 OE EV v.s. fmo-2 KO EV	40.57	0	0
43								fmo-4 OE EV v.s. WT EV	53.7	0	0
45								fmo-4 OE EV v.s. WT atf4	27.03	2e-07	1.8e-06
								fmo-4 OE EV v.s. C9 atf4	0.64	0.4252	1
								fmo-4 OE EV v.s. fmo2 atf4	49.75	0	0
								fmo-4 OE EV v.s. 4OE atf4	6.53	0.0106	0.0952
% fmo2 atf4 [77]								fmo-4 OE EV v.s. 4KO atf4	43.09	0	0
#days	dead	censored						fmo-4 OE EV v.s. fmo-2 OE EV	0.01	0.9312	1
0								fmo-4 OE EV v.s. fmo-4 KO EV	64.02	0	0
5								fmo-4 OE EV v.s. fmo-2 KO EV	44.86	0	0
7								fmo-4 KO EV v.s. WT EV	2.67	0.1022	0.9196
9	0							fmo-4 KO EV v.s. WT atf4	25.49	4.4e-07	4e-06
13	0							fmo-4 KO EV v.s. C9 atf4	53.23	0	0
15	7							fmo-4 KO EV v.s. fmo2 atf4	0.53	0.4661	1
17	2							fmo-4 KO EV v.s. 4OE atf4	53.4	0	0
20	5							fmo-4 KO EV v.s. 4KO atf4	1.11	0.2925	1
22	10							fmo-4 KO EV v.s. fmo-2 OE EV	59.81	0	0
24	26							fmo-4 KO EV v.s. fmo-4 OE EV	64.02	0	0
27	16							fmo-4 KO EV v.s. fmo-2 KO EV	1.89	0.1691	1
29	9							fmo-2 KO EV v.s. WT EV	0.01	0.9183	1
31	2							fmo-2 KO EV v.s. WT atf4	10.21	0.0014	0.0126
34								fmo-2 KO EV v.s. C9 atf4	36.3	0	0
36								fmo-2 KO EV v.s. fmo2 atf4	0.42	0.5179	1	NS
38								fmo-2 KO EV v.s. 4OE atf4	31	2.6e-08	2.3e-07
41								fmo-2 KO EV v.s. 4KO atf4	0.01	0.9399	1
43								fmo-2 KO EV v.s. fmo-2 OE EV	40.57	0	0
45								fmo-2 KO EV v.s. fmo-4 OE EV	44.86	0	0
								fmo-2 KO EV v.s. fmo-4 KO EV	1.89	0.1691	1
% 4OE atf4 [121]
#days	dead	censored
0
5
7
9	0
13	0
15	4
17	1
20	4
22	7
24	14
27	29
29	35
31	15
34	9
36	3
38
41
43
45
% 4KO atf4 [82]
#days	dead	censored
0
5
7
9	0
13	7
15	6
17	5
20	12
22	5
24	15
27	14
29	10
31	8
34
36
38
41
43
45
% fmo-2 OE EV [112]
#days	dead	censored
0
5
7
9	0
13	1
15	1
17	4
20	6
22	6
24	11
27	19
29	25
31	15
34	14
36	6
38	2
41	0
43	2
45
% fmo-4 OE EV [117]
#days	dead	censored
0
5
7
9	0
13	2
15	2
17	4
20	5
22	6
24	13
27	14
29	26
31	19
34	17
36	4
38	5
41
43
45
% fmo-4 KO EV [100]
#days	dead	censored
0
5
7
9	0
13	4
15	7
17	5
20	13
22	10
24	27
27	21
29	11
31	2
34
36
38
41
43
45
% fmo-2 KO EV [86]
#days	dead	censored
0
5
7
9	0
13	3
15	5
17	9
20	8
22	10
24	14
27	15
29	19
31	3
34
36
38
41
43
45

## Sheet: Sheet1
#1	N2								#1	N2					#1	N2
#2	Lei42	fmo-2p::MC; unc-119p::HIF-1(P621A); JT307 #1							#2	Lei42	fmo-2p::MC; unc-119p::HIF-1(P621A); JT307 #1				#11L	Lei51	fmo-2p::MC; JT307; gcy-31; gcy-36 - XA2262 sibling #1
#3	Lei43	fmo-2p::MC; unc-119p::HIF-1(P621A); JT307 #2							#3	Lei43	fmo-2p::MC; unc-119p::HIF-1(P621A); JT307 #2				#12L	Lei52	fmo-2p::MC; JT307; gcy-33; gcy-36 - XA2262 sibling #1
#4	Lei44	fmo-2p::MC; TU3311; CB5602 #1							#4	Lei44	fmo-2p::MC; TU3311; CB5602 #1				#13	Lei53	fmo-2p::MC; JT307; gcy-33; gcy-36 - XA2262 sibling #2
#5	Lei45	fmo-2p::MC; TU3311 #1							#5	Lei45	fmo-2p::MC; TU3311 #1				#14L	Lei55	fmo-2p::MC; JT307 - XA2262 sibling #1
#6	Lei46	fmo-2p::MC; CB5602 #1							#6	Lei46	fmo-2p::MC; CB5602 #1				#15L	Lei56	fmo-2p::MC; JT307 - XA2262 sibling #2
#7	Lei47	fmo-2p::MC; TU3311; CB5602 #2							#7	Lei47	fmo-2p::MC; TU3311; CB5602 #2				#16	Lei57	fmo-2p::MC - XA2262 sibling #1
#8L	Lei48	fmo-2p::MC; JT307; XA2262 #1													#17	Lei58	fmo-2p::MC - XA2262 sibling #2
#9	Lei49	fmo-2p::MC; JT307; XA2262 #2													#18	Lei59	fmo-2p::MC; gcy-33; gcy-36 - XA2262 sibling #1
#10L	Lei50	fmo-2p::MC; JT307; XA2262 #3							#1	N2					#19	Lei60	fmo-2p::MC; gcy-33; gcy-36 - XA2262 sibling #2
#11L	Lei51	fmo-2p::MC; JT307; gcy-31; gcy-36 - XA2262 sibling #1							#8L	Lei48	fmo-2p::MC; JT307; XA2262 #1
#12L	Lei52	fmo-2p::MC; JT307; gcy-33; gcy-36 - XA2262 sibling #1							#9	Lei49	fmo-2p::MC; JT307; XA2262 #2
#13	Lei53	fmo-2p::MC; JT307; gcy-33; gcy-36 - XA2262 sibling #2							#10L	Lei50	fmo-2p::MC; JT307; XA2262 #3
#14L	Lei55	fmo-2p::MC; JT307 - XA2262 sibling #1							#14L	Lei55	fmo-2p::MC; JT307 - XA2262 sibling #1
#15L	Lei56	fmo-2p::MC; JT307 - XA2262 sibling #2							#15L	Lei56	fmo-2p::MC; JT307 - XA2262 sibling #2
#16	Lei57	fmo-2p::MC - XA2262 sibling #1							#16	Lei57	fmo-2p::MC - XA2262 sibling #1
#17	Lei58	fmo-2p::MC - XA2262 sibling #2							#17	Lei58	fmo-2p::MC - XA2262 sibling #2
#18	Lei59	fmo-2p::MC; gcy-33; gcy-36 - XA2262 sibling #1							#20	Lei61	fmo-2p::MC; XA2262 #1
#19	Lei60	fmo-2p::MC; gcy-33; gcy-36 - XA2262 sibling #2							#21	Lei62	fmo-2p::MC; XA2262 #2
#20	Lei61	fmo-2p::MC; XA2262 #1
#21	Lei62	fmo-2p::MC; XA2262 #2
