# Supplementary material for: fmo-4 promotes longevity and stress resistance via ER to mitochondria calcium regulation in C. elegans
Source: eLife journal article supplement (doi:10.7554/elife.99971), 2024-08-27
Supplement: fig3-figsupp3-data2 [file 05.26.2022 fmo4 OE;2KO stress resistance assay.xlsx]

## Sheet: data
strain	day	alive	dead-total	dead-normal	dead-ruptured	censored	ratio-alive	percentage-alive
N2	0	48	0		0	0	1	100
N2	3	43	5	5	0	0	0.895833	89.5833
N2	4	32	16	11	0	0	0.666667	66.6667						1	2	3	4	5	6	7	8	9	10	11	12							#19	#20	#21
N2	5	0	48	32		0	0	0			plot data here-->		day	WT	fmo-4 OE	fmo-2 KO	fmo-4 OE;2KO 2	fmo-4 OE;2KO 8														Lei60	Lei61	Lei62
N2	6	0	48			0	0	0				0	0	100	100	100	100	100
N2	7	0	48			0	0	0				3	3	89.5833	98.1818	96.7742	100	96.1538
N2	8	0	48			0	0	0				4	4	66.6667	94.5455	95.1613	98.1132	94.2308
N2	9	0	48			0	0	0				5	5	0	80	77.4194	86.7925	78.8462
N2	10	0	48			0	0	0				6	6		47.2727	51.6129	62.2642	59.6154
N2	11	0	48			0	0	0				7	7		23.6364	17.7419	13.2075	15.3846
N2	12	0	48			0	0	0				8	8		7.27273	6.45161	1.88679	7.69231
N2	13	0	48			0	0	0				9	9		0	1.6129	0	5.76923
N2	14	0	48			0	0	0				10	10			0		0
N2	15	0	48			0	0	0				11	11
N2	16	0	48			0	0	0				12	12
N2	17	0	48			0	0	0
N2	18	0	48			0	0	0
N2	19	0	48		0	0	0	0
N2	20	0	48		0	0	0	0
4OE	0	55	0		0	0	1	100
4OE	3	54	1	1		0	0.981818	98.1818
4OE	4	52	3	2		0	0.945455	94.5455
4OE	5	44	11	8		0	0.8	80
4OE	6	26	29	18		0	0.472727	47.2727
4OE	7	13	42	13		0	0.236364	23.6364
4OE	8	4	51	9		0	0.0727273	7.27273
4OE	9	0	55	4		0	0	0
4OE	10	0	55			0	0	0
4OE	11	0	55			0	0	0
4OE	12	0	55			0	0	0
4OE	13	0	55			0	0	0
4OE	14	0	55			0	0	0
4OE	15	0	55			0	0	0
4OE	16	0	55			0	0	0
4OE	17	0	55			0	0	0
4OE	18	0	55			0	0	0
4OE	19	0	55			0	0	0
4OE	20	0	55		0	0	0	0
2KO	0	62	0			0	1	100
2KO	3	60	2	2		0	0.967742	96.7742
2KO	4	59	3	1		0	0.951613	95.1613
2KO	5	48	14	11		0	0.774194	77.4194
2KO	6	32	30	16		0	0.516129	51.6129
2KO	7	11	51	21		0	0.177419	17.7419
2KO	8	4	58	7		0	0.0645161	6.45161
2KO	9	1	61	3		0	0.016129	1.6129
2KO	10	0	62	1		0	0	0
2KO	11	0	62			0	0	0
2KO	12	0	62			0	0	0
2KO	13	0	62			0	0	0
2KO	14	0	62			0	0	0
2KO	15	0	62			0	0	0
2KO	16	0	62			0	0	0
2KO	17	0	62			0	0	0
2KO	18	0	62		0	0	0	0
2KO	19	0	62		0	0	0	0
2KO	20	0	62		0	0	0	0
4O2K 2	0	53	0		0	0	1	100
4O2K 2	3	53	0	0		0	1	100
4O2K 2	4	52	1	1		0	0.981132	98.1132
4O2K 2	5	46	7	6		0	0.867925	86.7925
4O2K 2	6	33	20	13		0	0.622642	62.2642
4O2K 2	7	7	46	26			0.132075	13.2075
4O2K 2	8	1	52	6		0	0.0188679	1.88679
4O2K 2	9	0	53	1		0	0	0
4O2K 2	10	0	53			0	0	0
4O2K 2	11	0	53			0	0	0
4O2K 2	12	0	53			0	0	0
4O2K 2	13	0	53			0	0	0
4O2K 2	14	0	53			0	0	0
4O2K 2	15	0	53			0	0	0
4O2K 2	16	0	53			0	0	0
4O2K 2	17	0	53		0	0	0	0
4O2K 2	18	0	53		0	0	0	0
4O2K 2	19	0	53		0	0	0	0
4O2K 2	20	0	53		0	0	0	0
4O2K 8	0	52	0		0	0	1	100
4O2K 8	3	50	2	2	0	0	0.961538	96.1538
4O2K 8	4	49	3	1	0	0	0.942308	94.2308
4O2K 8	5	41	11	8		0	0.788462	78.8462
4O2K 8	6	31	21	10		0	0.596154	59.6154
4O2K 8	7	8	44	23		0	0.153846	15.3846
4O2K 8	8	4	48	4		0	0.0769231	7.69231
4O2K 8	9	3	49	1		0	0.0576923	5.76923
4O2K 8	10	0	52	3		0	0	0
4O2K 8	11	0	52			0	0	0
4O2K 8	12	0	52			0	0	0
4O2K 8	13	0	52			0	0	0
4O2K 8	14	0	52			0	0	0
4O2K 8	15	0	52			0	0	0
4O2K 8	16	0	52			0	0	0
4O2K 8	17	0	52			0	0	0
4O2K 8	18	0	52			0	0	0
4O2K 8	19	0	52		0	0	0	0
4O2K 8	20	0	52		0	0	0	0
2O;4K	0	67	0		0	0	1	100
2O;4K	3	67	0		0	0	1	100
2O;4K	4	67	0		0	0	1	100
2O;4K	5	67	0		0	0	1	100
2O;4K	6	67	0			0	1	100
2O;4K	7	67	0			0	1	100
2O;4K	8	67	0			0	1	100
2O;4K	9	67	0			0	1	100
2O;4K	10	67	0			0	1	100
2O;4K	11	67	0			0	1	100
2O;4K	12	67	0			0	1	100
2O;4K	13	67	0			0	1	100
2O;4K	14	67	0			0	1	100
2O;4K	15	67	0			0	1	100
2O;4K	16	67	0			0	1	100
2O;4K	17	67	0			0	1	100
2O;4K	18	67	0			0	1	100
2O;4K	19	67	0			0	1	100
2O;4K	20	67	0		0	0	1	100
7	0	86	0		0	0	1	100
7	5	86	0		0	0	1	100
7	7	86	0		0	0	1	100
7	10	86	0		0	0	1	100
7	13	86	0		0	0	1	100
7	16	86	0			0	1	100
7	17	86	0			0	1	100
7	20	86	0			0	1	100
7	22	86	0			0	1	100
7	24	86	0			0	1	100
7	27	86	0			0	1	100
7	29	86	0			0	1	100
7	31	86	0			0	1	100
7	34	86	0			0	1	100
7	36	86	0			0	1	100
7	38	86	0			0	1	100
7	41	86	0		0	0	1	100
7	44	86	0		0	0	1	100
7	46	86	0		0	0	1	100
8	0	103	0		0	0	1	100
8	5	103	0		0	0	1	100
8	7	103	0		0	0	1	100
8	10	103	0		0	0	1	100
8	13	103	0		0	0	1	100
8	16	103	0		0	0	1	100
8	17	103	0			0	1	100
8	20	103	0			0	1	100
8	22	103	0			0	1	100
8	24	103	0			0	1	100
8	27	103	0			0	1	100
8	29	103	0			0	1	100
8	31	103	0			0	1	100
8	34	103	0			0	1	100
8	36	103	0			0	1	100
8	38	103	0		0	0	1	100
8	41	103	0		0	0	1	100
8	44	103	0		0	0	1	100
	46
9	0	96	0		0	0	1	100
9	5	96	0		0	0	1	100
9	7	96	0		0	0	1	100
9	10	96	0		0	0	1	100
9	13	96	0		0	0	1	100
9	16	95	1		1	0	0.989583	98.9583
9	17	95	1			0	0.989583	98.9583
9	20	95	1			0	0.989583	98.9583
9	22	95	1			0	0.989583	98.9583
9	24	95	1			0	0.989583	98.9583
9	27	95	1			0	0.989583	98.9583
9	29	95	1			0	0.989583	98.9583
9	31	95	1			0	0.989583	98.9583
9	34	95	1			0	0.989583	98.9583
9	36	95	1			0	0.989583	98.9583
9	38	95	1			0	0.989583	98.9583
9	41	95	1			0	0.989583	98.9583
9	44	95	1			0	0.989583	98.9583
9	46	95	1		0		0.989583	98.9583
9	47	95	1		0		0.989583	98.9583
10L	0	78	0		0	0	1	100
10	5	78	0		0	0	1	100
10	7	78	0		0	0	1	100
10	10	78	0		0	0	1	100
10	13	78	0			0	1	100
10	16	78	0			0	1	100
10	17	78	0			0	1	100
10	20	78	0			0	1	100
10	22	78	0			0	1	100
10	24	78	0			0	1	100
10	27	78	0			0	1	100
10	29	78	0			0	1	100
10	31	78	0			0	1	100
10	34	78	0			0	1	100
10	36	78	0		0	0	1	100
10	38	78	0		0	0	0.757282	75.7282
10	41	78	0		0	0	0.757282	75.7282
10	44	78	0		0	0	0.757282	75.7282
	46	78	0		0	0	0.757282	75.7282
	48	78	0		0	0	0.757282	75.7282
11L	0	104	0		0	0	1	100
11	5	104	0		0	0	1	100
11	7	104	0		0	0	1	100
11	11	104	0		0	0	1	100
11	13	103	1		1	0	0.990385	99.0385
11	16	103	1			0	0.990385	99.0385
11	18	102	2		1	0	0.980769	98.0769
11	20	101	3		1	0	0.971154	97.1154
11	23	101	3		0	0	0.971154	97.1154
11	25	101	3			0	0.971154	97.1154
11	27	101	3			0	0.971154	97.1154
11	30	101	3			0	0.971154	97.1154
11	32	101	3			0	0.971154	97.1154
11	34	101	3			0	0.971154	97.1154
11	37	101	3		0	0	0.971154	97.1154
11	39	101	3		0	0	0.971154	97.1154
11	41	101	3		0	0	0.971154	97.1154
11	44	101	3		0	0	0.971154	97.1154
	46
12L	0	62	0		0	0	1	100
12	5	62	0		0	0	1	100
12	7	62	0		0	0	1	100
12	11	62	0		0	0	1	100
12	13	62	0		0	0	1	100
12	16	62	0			0	1	100
12	18	62	0			0	1	100
12	20	62	0			0	1	100
12	23	62	0			0	1	100
12	25	62	0			0	1	100
12	27	62	0			0	1	100
12	30	62	0			0	1	100
12	32	62	0			0	1	100
12	34	62	0			0	1	100
12	37	62	0			0	1	100
12	39	62	0			0	1	100
12	41	62	0		0	0	1	100
12	44	62	0		0	0	1	100
	46
13	0	48	0		0	0	1	100
13	5	48	0		0	0	1	100
13	7	48	0		0	0	1	100
13	11	48	0		0	0	1	100
13	14	48	0		0	0	1	100
13	16	47	1		1	0	0.979167	97.9167
13	18	45	3		2	0	0.9375	93.75
13	21	43	5		2	0	0.895833	89.5833
13	23	43	5		0	0	0.895833	89.5833
13	25	43	5			0	0.895833	89.5833
13	28	43	5			0	0.895833	89.5833
13	30	43	5			0	0.895833	89.5833
13	32	43	5			0	0.895833	89.5833
13	35	43	5			0	0.895833	89.5833
13	37	43	5			0	0.895833	89.5833
13	39	43	5			0	0.895833	89.5833
13	42	43	5			0	0.895833	89.5833
13	44	43	5			0	0.895833	89.5833
13	45	43	5				0.895833	89.5833
14L	0	51	0		0	0	1	100
14	5	51	0		0	0	1	100
14	7	51	0		0	0	1	100
14	11	51	0		0	0	1	100
14	14	50	1		1	0	0.980392	98.0392
14	16	50	1		0	0	0.980392	98.0392
14	18	50	1		0	0	0.980392	98.0392
14	21	48	3		2	0	0.941176	94.1176
14	23	48	3		0	0	0.941176	94.1176
14	25	48	3			0	0.941176	94.1176
14	28	48	3			0	0.941176	94.1176
14	30	48	3			0	0.941176	94.1176
14	32	48	3			0	0.941176	94.1176
14	35	48	3			0	0.941176	94.1176
14	37	48	3			0	0.941176	94.1176
14	39	48	3			0	0.941176	94.1176
14	42	48	3		0	0	0.941176	94.1176
14	44	48	3		0	0	0.941176	94.1176
15L	0	156	0		0	0	1	100
15	5	156	0		0	0	1	100
15	7	156	0		0	0	1	100
15	10	156	0		0	0	1	100
15	12	156	0		0	0	1	100
15	14	156	0		0	0	1	100
15	17	156	0		0	0	1	100
15	19	156	0		0	0	1	100
15	21	152	4		4	0	0.974359	97.4359
15	24	147	9		5	0	0.942308	94.2308
15	26	144	12		3	0	0.923077	92.3077
15	29	144	12		0	0	0.923077	92.3077
15	31	144	12		0	0	0.923077	92.3077
15	33	144	12		0	0	0.923077	92.3077
15	35	144	12		0	0	0.923077	92.3077
15	38	144	12		0	0	0.923077	92.3077
15	40	144	12		0	0	0.923077	92.3077
15		144	12		0	0	0.923077	92.3077
16	0	156	0		0	0	1	100
16	5	156	0		0	0	1	100
16	7	156	0		0	0	1	100
16	10	156	0		0	0	1	100
16	12	156	0		0	0	1	100
16	14	156	0		0	0	1	100
16	17	156	0		0	0	1	100
16	19	154	2		2	0	0.987179	98.7179
16	21	146	10		8	0	0.935897	93.5897
16	24	118	38		28	0	0.75641	75.641
16	26	110	46		8	0	0.705128	70.5128
16	29	110	46		0	0	0.705128	70.5128
16	31	110	46		0	0	0.705128	70.5128
16	33	110	46		0	0	0.705128	70.5128
16	35	110	46		0	0	0.705128	70.5128
16	38	110	46		0	0	0.705128	70.5128
16	40	110	46		0	0	0.705128	70.5128
16	42	110	46		0	0	0.705128	70.5128
17	0	134	0		0	0	1	100
17	5	134	0		0	0	1	100
17	7	134	0		0	0	1	100
17	10	134	0		0	0	1	100
17	12	134	0		0	0	1	100
17	14	134	0		0	0	1	100
17	17	134	0		0	0	1	100
17	19	130	4		4	0	0.970149	97.0149
17	21	120	14		10	0	0.895522	89.5522
17	24	111	23		9	0	0.828358	82.8358
17	26	106	28		5	0	0.791045	79.1045
17	29	70	64	36	0	0	0.522388	52.2388
17	31	59	75	11	0	0	0.440299	44.0299
17	33	39	95	20	0	0	0.291045	29.1045
17	35	37	97	2	0	0	0.276119	27.6119
17	38	37	97	0	0	0	0.276119	27.6119
17	40	36	98	1	0	0	0.268657	26.8657
17		36	98	0	0	0	0.268657	26.8657
18	0	233	0	0	0	0	1	100
18	5	233	0	0	0	0	1	100
18	7	233	0	0	0	0	1	100
18	10	233	0	0	0	0	1	100
18	12	233	0	0	0	0	1	100
18	14	232	1	1	0	0	0.995708	99.5708
18	17	221	12	10	1	0	0.948498	94.8498
18	19	219	14	1	1	0	0.939914	93.9914
18	21	212	21	3	4	0	0.909871	90.9871
18	24	180	53	24	8	0	0.772532	77.2532
18	26	136	97	39	5	0	0.583691	58.3691
18	29	72	161	62	2	0	0.309013	30.9013
18	31	59	174	13	0	0	0.253219	25.3219
18	33	36	197	23	0	0	0.154506	15.4506
18	35	27	206	9	0	0	0.11588	11.588
18	38	15	218	12	0	0	0.0643777	6.43777
18	40	7	226	8	0	0	0.0300429	3.00429
18	42	7	226	0	0	0	0.0300429	3.00429
18	45	0	233	7	0	0	0	0
19	0	142	0	0	0	0	1	100
19	5	142	0	0	0	0	1	100
19	7	142	0	0	0	0	1	100
19	10	142	0	0	0	0	1	100
19	12	140	2	2	0	0	0.985915	98.5915
19	14	137	5	2	1	0	0.964789	96.4789
19	17	128	14	7	2	0	0.901408	90.1408
19	19	121	21	0	7	0	0.852113	85.2113
19	21	115	27	3	3	0	0.809859	80.9859
19	24	81	61	21	13	0	0.570423	57.0423
19	26	48	94	26	7	0	0.338028	33.8028
19	29	21	121	27	0	0	0.147887	14.7887
19	31	11	131	10	0	0	0.0774648	7.74648
19	33	2	140	9	0	0	0.0140845	1.40845
19	35	1	141	1	0	0	0.00704225	0.704225
19	38	0	142	1	0	0	0	0
19	40	0	142	0	0	0	0	0
19		0	142	0	0	0	0	0
20	0	227	0	0	0	0	1	100
20	5	227	0	0	0	0	1	100
20	7	227	0	0	0	0	1	100
20	10	227	0	0	0	0	1	100
20	12	224	3	3	0	0	0.986784	98.6784
20	14	224	3	0	0	0	0.986784	98.6784
20	17	214	13	8	2	0	0.942731	94.2731
20	19	202	25	5	7	0	0.889868	88.9868
20	21	180	47	10	12	0	0.792952	79.2952
20	24	116	111	31	33	0	0.511013	51.1013
20	26	86	141	26	4	0	0.378855	37.8855
20	29	21	206	59	6	0	0.092511	9.2511
20	31	7	220	14	0	0	0.030837	3.0837
20	33	1	226	6	0	0	0.00440529	0.440529
20	35	0	227	1	0	0	0	0
20	38	0	227	0	0	0	0	0
20	40	0	227	0	0	0	0	0
20		0	227	0	0	0	0	0
21	0	154	0	0	0	0	1	100
21	5	154	0	0	0	0	1	100
21	7	154	0	0	0	0	1	100
21	10	154	0	0	0	0	1	100
21	12	154	0	0	0	0	1	100
21	14	154	0	0	0	0	1	100
21	17	154	0	0	0	0	1	100
21	19	146	8	7	1	0	0.948052	94.8052
21	21	127	27	4	15	0	0.824675	82.4675
21	24	106	48	17	4	0	0.688312	68.8312
21	26	68	86	31	7	0	0.441558	44.1558
21	29	38	116	29	1	0	0.246753	24.6753
21	31	29	125	9	0	0	0.188312	18.8312
21	33	11	143	18	0	0	0.0714286	7.14286
21	35	5	149	6	0	0	0.0324675	3.24675
21	38	0	154	5	0	0	0	0
21	40	0	154	0	0	0	0	0
21		0	154	0	0	0	0	0

## Sheet: stats
% WT [48]					condition	chi	pvalue	corrected_pvalue
#days	dead	censored			WT v.s. fmo-4 OE	63.48	0	0
0					WT v.s. fmo-2 KO	65.1	0	0
3	5				WT v.s. fmo-4O2K 2	75.59	0	0
4	11				WT v.s. fmo-4O2K 8	59.17	0	0
5	32				fmo-4 OE v.s. WT	63.48	0	0
6					fmo-4 OE v.s. fmo-2 KO	0.01	0.9201	1
7					fmo-4 OE v.s. fmo-4O2K 2	0	0.9749	1
8					fmo-4 OE v.s. fmo-4O2K 8	0.33	0.5664	1
9					fmo-2 KO v.s. WT	65.1	0	0
10					fmo-2 KO v.s. fmo-4 OE	0.01	0.9201	1
11					fmo-2 KO v.s. fmo-4O2K 2	0.04	0.845	1
12					fmo-2 KO v.s. fmo-4O2K 8	0.45	0.5016	1
					fmo-4O2K 2 v.s. WT	75.59	0	0
					fmo-4O2K 2 v.s. fmo-4 OE	0	0.9749	1
					fmo-4O2K 2 v.s. fmo-2 KO	0.04	0.845	1
					fmo-4O2K 2 v.s. fmo-4O2K 8	0.13	0.7198	1
					fmo-4O2K 8 v.s. WT	59.17	0	0
					fmo-4O2K 8 v.s. fmo-4 OE	0.33	0.5664	1
					fmo-4O2K 8 v.s. fmo-2 KO	0.45	0.5016	1
					fmo-4O2K 8 v.s. fmo-4O2K 2	0.13	0.7198	1
% fmo-4 OE [55]
#days	dead	censored
0
3	1
4	2
5	8
6	18
7	13
8	9
9	4
10
11
12
% fmo-2 KO [62]
#days	dead	censored
0
3	2
4	1
5	11
6	16
7	21
8	7
9	3
10	1
11
12
% fmo-4O2K 2 [53]
#days	dead	censored
0
3	0
4	1
5	6
6	13
7	26
8	6
9	1
10
11
12
% fmo-4O2K 8 [52]
#days	dead	censored
0
3	2
4	1
5	8
6	10
7	23
8	4
9	1
10	3
11
12

## Sheet: Sheet2
condition	chi	pvalue	corrected_pvalue
WT v.s. fmo-2 OE	16.49	4.9e-05	0.0002
WT v.s. WT fmo-4 OE	4.16	0.0414	0.2072
WT v.s. fmo-4 KO	0.15	0.6952	1
WT v.s. fmo-2O;4O	7.43	0.0064	0.032
WT v.s. fmo-2O;4KO	2.03	0.1543	0.7713
fmo-2 OE v.s. WT	16.49	4.9e-05	0.0002
fmo-2 OE v.s. WT fmo-4 OE	6.12	0.0133	0.0667
fmo-2 OE v.s. fmo-4 KO	25.5	4.4e-07	2.2e-06
fmo-2 OE v.s. fmo-2O;4O	0.74	0.3912	1
fmo-2 OE v.s. fmo-2O;4KO	29.56	5.4e-08	2.7e-07
WT fmo-4 OE v.s. WT	4.16	0.0414	0.2072
WT fmo-4 OE v.s. fmo-2 OE	6.12	0.0133	0.0667
WT fmo-4 OE v.s. fmo-4 KO	7.7	0.0055	0.0276
WT fmo-4 OE v.s. fmo-2O;4O	2.94	0.0864	0.4318
WT fmo-4 OE v.s. fmo-2O;4KO	11.1	0.0009	0.0043
fmo-4 KO v.s. WT	0.15	0.6952	1
fmo-4 KO v.s. fmo-2 OE	25.5	4.4e-07	2.2e-06
fmo-4 KO v.s. WT fmo-4 OE	7.7	0.0055	0.0276
fmo-4 KO v.s. fmo-2O;4O	12.57	0.0004	0.002
fmo-4 KO v.s. fmo-2O;4KO	1.39	0.2392	1
fmo-2O;4O v.s. WT	7.43	0.0064	0.032
fmo-2O;4O v.s. fmo-2 OE	0.74	0.3912	1
fmo-2O;4O v.s. WT fmo-4 OE	2.94	0.0864	0.4318
fmo-2O;4O v.s. fmo-4 KO	12.57	0.0004	0.002
fmo-2O;4O v.s. fmo-2O;4KO	15.6	0.0001	0.0004
fmo-2O;4KO v.s. WT	2.03	0.1543	0.7713
fmo-2O;4KO v.s. fmo-2 OE	29.56	5.4e-08	2.7e-07
fmo-2O;4KO v.s. WT fmo-4 OE	11.1	0.0009	0.0043
fmo-2O;4KO v.s. fmo-4 KO	1.39	0.2392	1
fmo-2O;4KO v.s. fmo-2O;4O	15.6	0.0001	0.0004

## Sheet: Sheet1
#1	N2								#1	N2					#1	N2
#2	Lei42	fmo-2p::MC; unc-119p::HIF-1(P621A); JT307 #1							#2	Lei42	fmo-2p::MC; unc-119p::HIF-1(P621A); JT307 #1				#11L	Lei51	fmo-2p::MC; JT307; gcy-31; gcy-36 - XA2262 sibling #1
#3	Lei43	fmo-2p::MC; unc-119p::HIF-1(P621A); JT307 #2							#3	Lei43	fmo-2p::MC; unc-119p::HIF-1(P621A); JT307 #2				#12L	Lei52	fmo-2p::MC; JT307; gcy-33; gcy-36 - XA2262 sibling #1
#4	Lei44	fmo-2p::MC; TU3311; CB5602 #1							#4	Lei44	fmo-2p::MC; TU3311; CB5602 #1				#13	Lei53	fmo-2p::MC; JT307; gcy-33; gcy-36 - XA2262 sibling #2
#5	Lei45	fmo-2p::MC; TU3311 #1							#5	Lei45	fmo-2p::MC; TU3311 #1				#14L	Lei55	fmo-2p::MC; JT307 - XA2262 sibling #1
#6	Lei46	fmo-2p::MC; CB5602 #1							#6	Lei46	fmo-2p::MC; CB5602 #1				#15L	Lei56	fmo-2p::MC; JT307 - XA2262 sibling #2
#7	Lei47	fmo-2p::MC; TU3311; CB5602 #2							#7	Lei47	fmo-2p::MC; TU3311; CB5602 #2				#16	Lei57	fmo-2p::MC - XA2262 sibling #1
#8L	Lei48	fmo-2p::MC; JT307; XA2262 #1													#17	Lei58	fmo-2p::MC - XA2262 sibling #2
#9	Lei49	fmo-2p::MC; JT307; XA2262 #2													#18	Lei59	fmo-2p::MC; gcy-33; gcy-36 - XA2262 sibling #1
#10L	Lei50	fmo-2p::MC; JT307; XA2262 #3							#1	N2					#19	Lei60	fmo-2p::MC; gcy-33; gcy-36 - XA2262 sibling #2
#11L	Lei51	fmo-2p::MC; JT307; gcy-31; gcy-36 - XA2262 sibling #1							#8L	Lei48	fmo-2p::MC; JT307; XA2262 #1
#12L	Lei52	fmo-2p::MC; JT307; gcy-33; gcy-36 - XA2262 sibling #1							#9	Lei49	fmo-2p::MC; JT307; XA2262 #2
#13	Lei53	fmo-2p::MC; JT307; gcy-33; gcy-36 - XA2262 sibling #2							#10L	Lei50	fmo-2p::MC; JT307; XA2262 #3
#14L	Lei55	fmo-2p::MC; JT307 - XA2262 sibling #1							#14L	Lei55	fmo-2p::MC; JT307 - XA2262 sibling #1
#15L	Lei56	fmo-2p::MC; JT307 - XA2262 sibling #2							#15L	Lei56	fmo-2p::MC; JT307 - XA2262 sibling #2
#16	Lei57	fmo-2p::MC - XA2262 sibling #1							#16	Lei57	fmo-2p::MC - XA2262 sibling #1
#17	Lei58	fmo-2p::MC - XA2262 sibling #2							#17	Lei58	fmo-2p::MC - XA2262 sibling #2
#18	Lei59	fmo-2p::MC; gcy-33; gcy-36 - XA2262 sibling #1							#20	Lei61	fmo-2p::MC; XA2262 #1
#19	Lei60	fmo-2p::MC; gcy-33; gcy-36 - XA2262 sibling #2							#21	Lei62	fmo-2p::MC; XA2262 #2
#20	Lei61	fmo-2p::MC; XA2262 #1
#21	Lei62	fmo-2p::MC; XA2262 #2
