# Supplementary material for: fmo-4 promotes longevity and stress resistance via ER to mitochondria calcium regulation in C. elegans
Source: eLife journal article supplement (doi:10.7554/elife.99971), 2024-08-27
Supplement: fig3-figsupp3-data4 [file 07.05.2022 tunicamycin test 4OE, 4O2K.xlsx]

## Sheet: Sheet1
	WT	FMO-4 OE	FMO-2 KO	FMO-4O;2K #2	FMO-4O;2K #8
0ug/mL	100	100	100	100	100
1ug/mL	0	0	0	0	0
5ug/mL	0	0	0	0	0
10ug/mL	0	0	0	0	0
	WT	FMO-4 OE	FMO-2 KO	FMO-4O;2K #2	FMO-4O;2K #8
0ug/mL	100	100	100	100	100
1ug/mL	0	0	0	0	0
5ug/mL	0	0	0	0	0
10ug/mL	0	0	0	0	0
