# Supplementary material for: fmo-4 promotes longevity and stress resistance via ER to mitochondria calcium regulation in C. elegans
Source: eLife journal article supplement (doi:10.7554/elife.99971), 2024-08-27
Supplement: fig4-data1 [file 02.07.22 fmo4 hyps specific and on hsp-4 RNAi lifespan.xlsx]

## Sheet: lifespan
strain	day	alive	dead-total	dead-normal	dead-ruptured	censored	ratio-alive	percentage-alive
N2 EV	0	95	0				1	100
N2 EV	5	95	0				1	100
N2 EV	7	95	0				1	100						1	2	3	4	5	6	7	8	9	10	11	12	13	14	15
N2 EV	9	95	0				1	100			plot data here-->		day	WT EV	WT; hsp-4	fmo-2 OE EV	fmo-2 OE; hsp-4	fmo-2 KO EV	fmo-2 KO; hsp-4	fmo-4 OE hyp sp; EV	fmo-4 OE hyp sp; hsp-4	fmo-4 KO EV	fmo-4 KO; hsp-4	2O;4K EV	2O;4K hsp-4	fmo-4 OE; hsp-4
N2 EV	10	95	0	0			1	100				0	0	100	100	100	100	100	100	100	100	100	100	100	100	100
N2 EV	12	92	3	3			0.968421	96.8421				5	5	100	100	100	100	100	100	100	100	100	100	100	100	100
N2 EV	14	86	9	6			0.905263	90.5263				7	7	100	100	100	100	100	100	100	100	100	100	100	100	100
N2 EV	17	76	19	10			0.8	80				9	9	100	100	100	100	100	100	100	100	100	100	100	100	100
N2 EV	19	63	32	13			0.663158	66.3158				10	10	100	100	100	100	100	100	100	100	100	100	100	100	100
N2 EV	21	47	48	16			0.494737	49.4737				12	12	96.8421	98.7952	100	98	98.9583	91.6667	97.8947	98.1132	94.4444	92.1053	96.2264	94.6237	98.1132
N2 EV	24	17	78	30			0.178947	17.8947				14	14	90.5263	89.1566	96.2264	84	95.8333	80.5556	95.7895	85.8491	85.5556	65.7895	86.7925	76.3441	85.8491
N2 EV	26	4	91	13			0.0421053	4.21053				17	17	80	59.0361	90.566	54	87.5	44.4444	90.5263	60.3774	73.3333	26.3158	75.4717	17.2043	60.3774
N2 EV	28	1	94	3			0.0105263	1.05263				19	19	66.3158	26.506	82.0755	36	64.5833	22.2222	82.1053	28.3019	55.5556	13.1579	52.8302	6.45161	28.3019
N2 EV	31	0	95	1			0	0				21	21	49.4737	9.63855	67.9245	26	42.7083	16.6667	72.6316	13.2075	32.2222	0	28.3019	4.30108	13.2075
N2 EV	33	0	95				0	0				24	24	17.8947	2.40964	46.2264	16	14.5833	5.55556	46.3158	2.83019	5.55556		0	1.07527	2.83019
N2 EV	35	0	95				0	0				26	26	4.21053	0	24.5283	4	4.16667	0	26.3158	0	0			0	0
N2 EV	37	0	95				0	0				28	28	1.05263		13.2075	0	0		14.7368
N2 EV	40	0	95				0	0				31	31	0		1.88679				3.15789
N2 EV	42	0	95				0	0				33	33			0.943396				0
												35	35			0.943396
C9 EV	0	106	0				1	100				37	37			0
C9 EV	5	106	0				1	100				40	40
C9 EV	7	106	0				1	100				42	42
C9 EV	9	106	0				1	100
C9 EV	10	106	0	0			1	100
C9 EV	12	106	0	0			1	100
C9 EV	14	102	4	4			0.962264	96.2264
C9 EV	17	96	10	6			0.90566	90.566
C9 EV	19	87	19	9			0.820755	82.0755
C9 EV	21	72	34	15			0.679245	67.9245
C9 EV	24	49	57	23			0.462264	46.2264
C9 EV	26	26	80	23			0.245283	24.5283
C9 EV	28	14	92	12			0.132075	13.2075
C9 EV	31	2	104	12			0.0188679	1.88679
C9 EV	33	1	105	1			0.00943396	0.943396
C9 EV	35	1	105	0			0.00943396	0.943396
C9 EV	37	0	106	1			0	0
C9 EV	40	0	106				0	0
C9 EV	42	0	106				0	0
fmo2 EV	0	96	0				1	100
fmo2 EV	5	96	0				1	100
fmo2 EV	7	96	0				1	100
fmo2 EV	9	96	0				1	100
fmo2 EV	10	96	0	0			1	100
fmo2 EV	12	95	1	1			0.989583	98.9583
fmo2 EV	14	92	4	3			0.958333	95.8333
fmo2 EV	17	84	12	8			0.875	87.5
fmo2 EV	19	62	34	22			0.645833	64.5833
fmo2 EV	21	41	55	21			0.427083	42.7083
fmo2 EV	24	14	82	27			0.145833	14.5833
fmo2 EV	26	4	92	10			0.0416667	4.16667
fmo2 EV	28	0	96	4			0	0
fmo2 EV	31	0	96				0	0
fmo2 EV	33	0	96				0	0
fmo2 EV	35	0	96				0	0
fmo2 EV	37	0	96				0	0
fmo2 EV	40	0	96				0	0
fmo2 EV	42	0	96				0	0
4OE EV	0	95	0				1	100
4OE EV	5	95	0				1	100
4OE EV	7	95	0				1	100
4OE EV	9	95	0				1	100
4OE EV	10	95	0	0			1	100
4OE EV	12	93	2	2			0.978947	97.8947
4OE EV	14	91	4	2			0.957895	95.7895
4OE EV	17	86	9	5			0.905263	90.5263
4OE EV	19	78	17	8			0.821053	82.1053
4OE EV	21	69	26	9			0.726316	72.6316
4OE EV	24	44	51	25			0.463158	46.3158
4OE EV	26	25	70	19			0.263158	26.3158
4OE EV	28	14	81	11			0.147368	14.7368
4OE EV	31	3	92	11			0.0315789	3.15789
4OE EV	33	0	95	3			0	0
4OE EV	35	0	95				0	0
4OE EV	37	0	95				0	0
4OE EV	40	0	95				0	0
4OE EV	42	0	95				0	0
4KO EV	0	90	0				1	100
4KO EV	5	90	0				1	100
4KO EV	7	90	0				1	100
4KO EV	9	90	0				1	100
4KO EV	10	90	0	0			1	100
4KO EV	12	85	5	5			0.944444	94.4444
4KO EV	14	77	13	8			0.855556	85.5556
4KO EV	17	66	24	11			0.733333	73.3333
4KO EV	19	50	40	16			0.555556	55.5556
4KO EV	21	29	61	21			0.322222	32.2222
4KO EV	24	5	85	24			0.0555556	5.55556
4KO EV	26	0	90	5			0	0
4KO EV	28	0	90				0	0
4KO EV	31	0	90				0	0
4KO EV	33	0	90				0	0
4KO EV	35	0	90				0	0
4KO EV	37	0	90				0	0
4KO EV	40	0	90				0	0
4KO EV	42	0	90				0	0
2O4K EV	0	53	0				1	100
2O4K EV	5	53	0				1	100
2O4K EV	7	53	0				1	100
2O4K EV	9	53	0				1	100
2O4K EV	10	53	0	0			1	100
2O4K EV	12	51	2	2			0.962264	96.2264
2O4K EV	14	46	7	5			0.867925	86.7925
2O4K EV	17	40	13	6			0.754717	75.4717
2O4K EV	19	28	25	12			0.528302	52.8302
2O4K EV	21	15	38	13			0.283019	28.3019
2O4K EV	24	0	53	15			0	0
2O4K EV	26	0	53				0	0
2O4K EV	28	0	53				0	0
2O4K EV	31	0	53				0	0
2O4K EV	33	0	53				0	0
2O4K EV	35	0	53				0	0
2O4K EV	37	0	53				0	0
2O4K EV	40	0	53				0	0
2O4K EV	42	0	53				0	0
N2 atf-4	0	83	0				1	100
N2 atf-4	5	83	0				1	100
N2 atf-4	7	83	0				1	100
N2 atf-4	9	83	0				1	100
N2 atf-4	10	83	0	0			1	100
N2 atf-4	12	82	1	1			0.987952	98.7952
N2 atf-4	14	74	9	8			0.891566	89.1566
N2 atf-4	17	49	34	25			0.590361	59.0361
N2 atf-4	19	22	61	27			0.26506	26.506
N2 atf-4	21	8	75	14			0.0963855	9.63855
N2 atf-4	24	2	81	6			0.0240964	2.40964
N2 atf-4	26	0	83	2			0	0
N2 atf-4	28	0	83				0	0
N2 atf-4	31	0	83				0	0
N2 atf-4	33	0	83				0	0
N2 atf-4	35	0	83				0	0
N2 atf-4	37	0	83				0	0
N2 atf-4	40	0	83				0	0
N2 atf-4	42	0	83				0	0
C9 atf-4	0	50	0				1	100
C9 atf-4	5	50	0				1	100
C9 atf-4	7	50	0				1	100
C9 atf-4	9	50	0				1	100
C9 atf-4	10	50	0	0			1	100
C9 atf-4	12	49	1	1			0.98	98
C9 atf-4	14	42	8	7			0.84	84
C9 atf-4	17	27	23	15			0.54	54
C9 atf-4	19	18	32	9			0.36	36
C9 atf-4	21	13	37	5			0.26	26
C9 atf-4	24	8	42	5			0.16	16
C9 atf-4	26	2	48	6			0.04	4
C9 atf-4	28	0	50	2			0	0
C9 atf-4	31	0	50				0	0
C9 atf-4	33	0	50				0	0
C9 atf-4	35	0	50				0	0
C9 atf-4	37	0	50				0	0
C9 atf-4	40	0	50				0	0
C9 atf-4	42
fmo2 atf-4	0	36	0				1	100
fmo2 atf-4	5	36	0				1	100
fmo2 atf-4	7	36	0				1	100
fmo2 atf-4	9	36	0				1	100
fmo2 atf-4	10	36	0	0			1	100
fmo2 atf-4	12	33	3	3			0.916667	91.6667
fmo2 atf-4	14	29	7	4			0.805556	80.5556
fmo2 atf-4	17	16	20	13			0.444444	44.4444
fmo2 atf-4	19	8	28	8			0.222222	22.2222
fmo2 atf-4	21	6	30	2			0.166667	16.6667
fmo2 atf-4	24	2	34	4			0.0555556	5.55556
fmo2 atf-4	26	0	36	2			0	0
fmo2 atf-4	28	0	36				0	0
fmo2 atf-4	31	0	36				0	0
fmo2 atf-4	33	0	36				0	0
fmo2 atf-4	35	0	36				0	0
fmo2 atf-4	37	0	36				0	0
fmo2 atf-4	40	0	36				0	0
fmo2 atf-4	42	0	36				0	0
fmo2 atf-4	47	0	36				0	0
4OE atf-4	0	106	0				1	100
4OE atf-4	5	106	0				1	100
4OE atf-4	7	106	0				1	100
4OE atf-4	9	106	0				1	100
4OE atf-4	10	106	0	0			1	100
4OE atf-4	12	104	2	2			0.981132	98.1132
4OE atf-4	14	91	15	13			0.858491	85.8491
4OE atf-4	17	64	42	27			0.603774	60.3774
4OE atf-4	19	30	76	34			0.283019	28.3019
4OE atf-4	21	14	92	16			0.132075	13.2075
4OE atf-4	24	3	103	11			0.0283019	2.83019
4OE atf-4	26	0	106	3			0	0
4OE atf-4	28	0	106				0	0
4OE atf-4	31	0	106				0	0
4OE atf-4	33	0	106				0	0
4OE atf-4	35	0	106				0	0
4OE atf-4	37	0	106				0	0
4OE atf-4	40	0	106				0	0
	42
4KO atf-4	0	38	0				1	100
4KO atf-4	5	38	0				1	100
4KO atf-4	7	38	0				1	100
4KO atf-4	9	38	0				1	100
4KO atf-4	10	38	0	0			1	100
4KO atf-4	12	35	3	3			0.921053	92.1053
4KO atf-4	14	25	13	10			0.657895	65.7895
4KO atf-4	17	10	28	15			0.263158	26.3158
4KO atf-4	19	5	33	5			0.131579	13.1579
4KO atf-4	21	0	38	5			0	0
4KO atf-4	24	0	38				0	0
4KO atf-4	26	0	38				0	0
4KO atf-4	28	0	38				0	0
4KO atf-4	31	0	38				0	0
4KO atf-4	33	0	38				0	0
4KO atf-4	35	0	38				0	0
4KO atf-4	37	0	38				0	0
4KO atf-4	40	0	38				0	0
4KO atf-4	42
2O4K atf-4	0	93	0				1	100
2O4K atf-4	5	93	0				1	100
2O4K atf-4	7	93	0				1	100
2O4K atf-4	9	93	0				1	100
2O4K atf-4	10	93	0	0			1	100
2O4K atf-4	12	88	5	5			0.946237	94.6237
2O4K atf-4	14	71	22	17			0.763441	76.3441
2O4K atf-4	17	16	77	55			0.172043	17.2043
2O4K atf-4	19	6	87	10			0.0645161	6.45161
2O4K atf-4	21	4	89	2			0.0430108	4.30108
2O4K atf-4	24	1	92	3			0.0107527	1.07527
2O4K atf-4	26	0	93	1			0	0
2O4K atf-4	28	0	93				0	0
2O4K atf-4	31	0	93				0	0
2O4K atf-4	33	0	93				0	0
2O4K atf-4	35	0	93				0	0
2O4K atf-4	37	0	93				0	0
2O4K atf-4	40	0	93				0	0
2O4K atf-4	42
N2 atf-6	0	105	0				1	100
N2 atf-6	5	105	0				1	100
N2 atf-6	7	105	0				1	100
N2 atf-6	9	105	0				1	100
N2 atf-6	10	105	0				1	100
N2 atf-6	12	105	0				1	100
N2 atf-6	14	105	0				1	100
N2 atf-6	17	105	0				1	100
N2 atf-6	19	105	0				1	100
N2 atf-6	21	105	0				1	100
N2 atf-6	24	105	0				1	100
N2 atf-6	26	105	0				1	100
N2 atf-6	28	105	0				1	100
N2 atf-6	31	105	0				1	100
N2 atf-6	33	105	0				1	100
N2 atf-6	35	105	0				1	100
N2 atf-6	37	105	0				1	100
N2 atf-6	40	105	0				1	100
N2 atf-6	42	105	0				1	100
C9 atf-6	0	114	0				1	100
C9 atf-6	5	114	0				1	100
C9 atf-6	7	114	0				1	100
C9 atf-6	9	114	0				1	100
C9 atf-6	13	114	0				1	100
C9 atf-6	15	114	0				1	100
C9 atf-6	17	114	0				1	100
C9 atf-6	20	114	0				1	100
C9 atf-6	22	114	0				1	100
C9 atf-6	24	114	0				1	100
C9 atf-6	27	114	0				1	100
C9 atf-6	29	114	0				1	100
C9 atf-6	31	114	0				1	100
C9 atf-6	34	114	0				1	100
C9 atf-6	36	114	0				1	100
C9 atf-6	38	114	0				1	100
C9 atf-6	41	114	0				1	100
C9 atf-6	43	114	0				1	100
C9 atf-6	45
fmo2 atf-6	0	68	0				1	100
fmo2 atf-6	5	68	0				1	100
fmo2 atf-6	7	68	0				1	100
fmo2 atf-6	9	68	0				1	100
fmo2 atf-6	13	68	0				1	100
fmo2 atf-6	15	68	0				1	100
fmo2 atf-6	17	68	0				1	100
fmo2 atf-6	20	68	0				1	100
fmo2 atf-6	22	68	0				1	100
fmo2 atf-6	24	68	0				1	100
fmo2 atf-6	27	68	0				1	100
fmo2 atf-6	29	68	0				1	100
fmo2 atf-6	31	68	0				1	100
fmo2 atf-6	34	68	0				1	100
fmo2 atf-6	36	68	0				1	100
fmo2 atf-6	38	68	0				1	100
fmo2 atf-6	41	68	0				1	100
fmo2 atf-6	43	68	0				1	100
fmo2 atf-6	45
4OE atf-6	0	69	0			0	1	100
4OE atf-6	5	69	0			0	1	100
4OE atf-6	7	69	0			0	1	100
4OE atf-6	9	69	0			0	1	100
4OE atf-6	13	69	0			0	1	100
4OE atf-6	15	69	0			0	1	100
4OE atf-6	17	69	0			0	1	100
4OE atf-6	20	69	0			0	1	100
4OE atf-6	22	69	0			0	1	100
4OE atf-6	24	69	0			0	1	100
4OE atf-6	27	69	0			0	1	100
4OE atf-6	29	69	0			0	1	100
4OE atf-6	31	69	0			0	1	100
4OE atf-6	34	69	0			0	1	100
4OE atf-6	36	69	0			0	1	100
4OE atf-6	38	69	0			0	1	100
4OE atf-6	41	69	0			0	1	100
4OE atf-6	43	69	0			0	1	100
4OE atf-6	45	69	0			0	1	100
4KO atf-6	0	89	0			0	1	100
4KO atf-6	5	89	0			0	1	100
4KO atf-6	7	89	0			0	1	100
4KO atf-6	9	89	0			0	1	100
4KO atf-6	13	89	0			0	1	100
4KO atf-6	15	89	0			0	1	100
4KO atf-6	17	89	0			0	1	100
4KO atf-6	20	89	0			0	1	100
4KO atf-6	22	89	0			0	1	100
4KO atf-6	24	89	0			0	1	100
4KO atf-6	27	89	0			0	1	100
4KO atf-6	29	89	0			0	1	100
4KO atf-6	31	89	0			0	1	100
4KO atf-6	34	89	0			0	1	100
4KO atf-6	36	89	0			0	1	100
4KO atf-6	38	89	0			0	1	100
4KO atf-6	41	89	0			0	1	100
4KO atf-6	43	89	0			0	1	100
4KO atf-6	45	89	0			0	1	100
		89
2O4K atf-6	0	87	0			0	1	100
2O4K atf-6	5	87	0			0	1	100
2O4K atf-6	7	87	0			0	1	100
2O4K atf-6	9	87	0	0		0	1	100
2O4K atf-6	13	83	4	4		0	0.954023	95.4023
2O4K atf-6	15	77	10	6		0	0.885057	88.5057
2O4K atf-6	17	66	21	11		0	0.758621	75.8621
2O4K atf-6	20	56	31	10		0	0.643678	64.3678
2O4K atf-6	22	43	44	13		0	0.494253	49.4253
2O4K atf-6	24	27	60	16		0	0.310345	31.0345
2O4K atf-6	27	11	76	16		0	0.126437	12.6437
2O4K atf-6	29	2	85	9		0	0.0229885	2.29885
2O4K atf-6	31	0	87	2		0	0	0
2O4K atf-6	34	0	87			0	0	0
2O4K atf-6	36	0	87			0	0	0
2O4K atf-6	38	0	87			0	0	0
2O4K atf-6	41	0	87			0	0	0
2O4K atf-6	43	0	87			0	0	0
2O4K atf-6	45	0	87			0	0	0
							0

## Sheet: stats
% WT [95]
#days	dead	censored
0
5
7
9
10	0
12	3
14	6
17	10
19	13
21	16
24	30
26	13
28	3
31	1
33
35
37
40
42
% fmo-4 OE hyp sp [95]
#days	dead	censored
0
5
7
9
10	0
12	2
14	2
17	5
19	8
21	9
24	25
26	19
28	11
31	11
33	3
35
37
40
42
% fmo-4 KO[90]
#days	dead	censored
0
5
7
9
10	0
12	5
14	8
17	11
19	16
21	21
24	24
26	5
28
31
33
35
37
40
42

## Sheet: Sheet3
condition	chi	pvalue	corrected_pvalue
WT v.s. fmo-4 OE hyp sp	25.12	5.4e-07	1.1e-06
WT v.s. fmo-4 KO	8.54	0.0035	0.007
fmo-4 OE hyp sp v.s. WT	25.12	5.4e-07	1.1e-06
fmo-4 OE hyp sp v.s. fmo-4 KO	51.17	0	0
fmo-4 KO v.s. WT	8.54	0.0035	0.007
fmo-4 KO v.s. fmo-4 OE hyp sp	51.17	0	0

## Sheet: Sheet1
#1	N2								#1	N2					#1	N2
#2	Lei42	fmo-2p::MC; unc-119p::HIF-1(P621A); JT307 #1							#2	Lei42	fmo-2p::MC; unc-119p::HIF-1(P621A); JT307 #1				#11L	Lei51	fmo-2p::MC; JT307; gcy-31; gcy-36 - XA2262 sibling #1
#3	Lei43	fmo-2p::MC; unc-119p::HIF-1(P621A); JT307 #2							#3	Lei43	fmo-2p::MC; unc-119p::HIF-1(P621A); JT307 #2				#12L	Lei52	fmo-2p::MC; JT307; gcy-33; gcy-36 - XA2262 sibling #1
#4	Lei44	fmo-2p::MC; TU3311; CB5602 #1							#4	Lei44	fmo-2p::MC; TU3311; CB5602 #1				#13	Lei53	fmo-2p::MC; JT307; gcy-33; gcy-36 - XA2262 sibling #2
#5	Lei45	fmo-2p::MC; TU3311 #1							#5	Lei45	fmo-2p::MC; TU3311 #1				#14L	Lei55	fmo-2p::MC; JT307 - XA2262 sibling #1
#6	Lei46	fmo-2p::MC; CB5602 #1							#6	Lei46	fmo-2p::MC; CB5602 #1				#15L	Lei56	fmo-2p::MC; JT307 - XA2262 sibling #2
#7	Lei47	fmo-2p::MC; TU3311; CB5602 #2							#7	Lei47	fmo-2p::MC; TU3311; CB5602 #2				#16	Lei57	fmo-2p::MC - XA2262 sibling #1
#8L	Lei48	fmo-2p::MC; JT307; XA2262 #1													#17	Lei58	fmo-2p::MC - XA2262 sibling #2
#9	Lei49	fmo-2p::MC; JT307; XA2262 #2													#18	Lei59	fmo-2p::MC; gcy-33; gcy-36 - XA2262 sibling #1
#10L	Lei50	fmo-2p::MC; JT307; XA2262 #3							#1	N2					#19	Lei60	fmo-2p::MC; gcy-33; gcy-36 - XA2262 sibling #2
#11L	Lei51	fmo-2p::MC; JT307; gcy-31; gcy-36 - XA2262 sibling #1							#8L	Lei48	fmo-2p::MC; JT307; XA2262 #1
#12L	Lei52	fmo-2p::MC; JT307; gcy-33; gcy-36 - XA2262 sibling #1							#9	Lei49	fmo-2p::MC; JT307; XA2262 #2
#13	Lei53	fmo-2p::MC; JT307; gcy-33; gcy-36 - XA2262 sibling #2							#10L	Lei50	fmo-2p::MC; JT307; XA2262 #3
#14L	Lei55	fmo-2p::MC; JT307 - XA2262 sibling #1							#14L	Lei55	fmo-2p::MC; JT307 - XA2262 sibling #1
#15L	Lei56	fmo-2p::MC; JT307 - XA2262 sibling #2							#15L	Lei56	fmo-2p::MC; JT307 - XA2262 sibling #2
#16	Lei57	fmo-2p::MC - XA2262 sibling #1							#16	Lei57	fmo-2p::MC - XA2262 sibling #1
#17	Lei58	fmo-2p::MC - XA2262 sibling #2							#17	Lei58	fmo-2p::MC - XA2262 sibling #2
#18	Lei59	fmo-2p::MC; gcy-33; gcy-36 - XA2262 sibling #1							#20	Lei61	fmo-2p::MC; XA2262 #1
#19	Lei60	fmo-2p::MC; gcy-33; gcy-36 - XA2262 sibling #2							#21	Lei62	fmo-2p::MC; XA2262 #2
#20	Lei61	fmo-2p::MC; XA2262 #1
#21	Lei62	fmo-2p::MC; XA2262 #2
