# Supplementary material for: fmo-4 promotes longevity and stress resistance via ER to mitochondria calcium regulation in C. elegans
Source: eLife journal article supplement (doi:10.7554/elife.99971), 2024-08-27
Supplement: fig4-data1 [file 14SEPT2023 4OE hyp specific lifespan.xlsx]

## Sheet: lifespan
strain	day	alive	dead-total	dead-normal	dead-ruptured	censored	ratio-alive	percentage-alive
N2	0	124	0				1	100
N2	5	124	0				1	100
N2	7	124	0				1	100						1	2	3	4	5	6	7	8	9	10	11	12	13	14	15
N2	10	124	0	0			1	100			plot data here-->		day	WT	FMO-4 OE Ubiq	FMO-4 OE Hyp Sp		FMO-4 KO
N2	12	123	1	1			0.991935	99.1935				0	0	100	100	100		100
N2	14	120	4	3			0.967742	96.7742				5	5	100	100	100		100
N2	17	109	15	11			0.879032	87.9032				7	7	100	100	100		100
N2	19	94	30	15			0.758065	75.8065				10	10	100	100	100		100
N2	21	57	67	37			0.459677	45.9677				12	12	99.1935	100	100		98.9474
N2	24	24	100	33			0.193548	19.3548				14	14	96.7742	100	100		94.7368
N2	26	7	117	17			0.0564516	5.64516				17	17	87.9032	97.2727	96.5812		84.2105
N2	28	1	123	6			0.00806452	0.806452				19	19	75.8065	87.2727	89.7436		67.3684
N2	31	0	124	1			0	0				21	21	45.9677	69.0909	71.7949		36.8421
N2	33	0	124				0	0				24	24	19.3548	50	52.1368		15.7895
N2	35	0	124				0	0				26	26	5.64516	30	35.0427		5.26316
N2	38	0	124				0	0				28	28	0.806452	16.3636	17.094		0
N2	40	0	124				0	0				31	31	0	7.27273	10.2564
N2	42	0	124				0	0				33	33		3.63636	2.5641
N2	45	0	124				0	0				35	35		0	0
												38	38
4OE	0	110	0				1	100				40	40
4OE	5	110	0				1	100				42	42
4OE	7	110	0				1	100				45	45
4OE	10	110	0	0			1	100				47	47
4OE	12	110	0	0			1	100
4OE	14	110	0	0			1	100
4OE	17	107	3	3			0.972727	97.2727
4OE	19	96	14	11			0.872727	87.2727
4OE	21	76	34	20			0.690909	69.0909
4OE	24	55	55	21			0.5	50
4OE	26	33	77	22			0.3	30
4OE	28	18	92	15			0.163636	16.3636
4OE	31	8	102	10			0.0727273	7.27273
4OE	33	4	106	4			0.0363636	3.63636
4OE	35	0	110	4			0	0
4OE	38	0	110				0	0
4OE	40	0	110				0	0
4OE	42	0	110				0	0
4OE	45	0	110				0	0
4OE 6.3	0	117	0				1	100
4OE 6.3	5	117	0				1	100
4OE 6.3	7	117	0				1	100
4OE 6.3	10	117	0	0			1	100
4OE 6.3	12	117	0	0			1	100
4OE 6.3	14	117	0	0			1	100
4OE 6.3	17	113	4	4			0.965812	96.5812
4OE 6.3	19	105	12	8			0.897436	89.7436
4OE 6.3	21	84	33	21			0.717949	71.7949
4OE 6.3	24	61	56	23			0.521368	52.1368
4OE 6.3	26	41	76	20			0.350427	35.0427
4OE 6.3	28	20	97	21			0.17094	17.094
4OE 6.3	31	12	105	8			0.102564	10.2564
4OE 6.3	33	3	114	9			0.025641	2.5641
4OE 6.3	35	0	117	3			0	0
4OE 6.3	38	0	117				0	0
4OE 6.3	40	0	117				0	0
4OE 6.3	42	0	117				0	0
4OE 6.3	45	0	117				0	0
4OE 2.6	0	98	0				1	100
4OE 2.6	5	98	0				1	100
4OE 2.6	7	98	0				1	100
4OE 2.6	10	98	0				1	100
4OE 2.6	12	98	0				1	100
4OE 2.6	14	98	0				1	100
4OE 2.6	17	98	0				1	100
4OE 2.6	19	98	0				1	100
4OE 2.6	21	98	0				1	100
4OE 2.6	24	98	0				1	100
4OE 2.6	26	98	0				1	100
4OE 2.6	28	98	0				1	100
4OE 2.6	31	98	0				1	100
4OE 2.6	33	98	0				1	100
4OE 2.6	35	98	0				1	100
4OE 2.6	38	98	0				1	100
4OE 2.6	40	98	0				1	100
4OE 2.6	42	98	0				1	100
4OE 2.6	45	98	0				1	100
4KO	0	95	0				1	100
4KO	5	95	0				1	100
4KO	7	95	0				1	100
4KO	10	95	0	0			1	100
4KO	12	94	1	1			0.989474	98.9474
4KO	14	90	5	4			0.947368	94.7368
4KO	17	80	15	10			0.842105	84.2105
4KO	19	64	31	16			0.673684	67.3684
4KO	21	35	60	29			0.368421	36.8421
4KO	24	15	80	20			0.157895	15.7895
4KO	26	5	90	10			0.0526316	5.26316
4KO	28	0	95	5			0	0
4KO	31	0	95				0	0
4KO	33	0	95				0	0
4KO	35	0	95				0	0
4KO	38	0	95				0	0
4KO	40	0	95				0	0
4KO	42	0	95				0	0
4KO	45	0	95				0	0
	0	104	0				1	100
	5	104	0				1	100
	7	104	0				1	100
	10	104	0				1	100
	12	104	0				1	100
	14	104	0				1	100
	17	104	0				1	100
	19	104	0				1	100
	21	104	0				1	100
	24	104	0				1	100
	26	104	0				1	100
	28	104	0				1	100
	31	104	0				1	100
	33	104	0				1	100
4KO atf6	35	104	0				1	100
4KO atf6	38	104	0				1	100
4KO atf6	40	104	0				1	100
4KO atf6	42	104	0				1	100
4KO atf6	45	104	0				1	100
WT daf2	0	120	0				1	100
WT daf2	5	120	0				1	100
WT daf2	7	120	0				1	100
WT daf2	10	120	0				1	100
WT daf2	12	120	0				1	100
WT daf2	14	120	0				1	100
WT daf2	17	120	0				1	100
WT daf2	19	120	0				1	100
WT daf2	21	120	0				1	100
WT daf2	24	120	0				1	100
WT daf2	26	120	0				1	100
WT daf2	28	120	0				1	100
WT daf2	31	120	0				1	100
WT daf2	33	120	0				1	100
WT daf2	35	120	0				1	100
WT daf2	38	120	0				1	100
WT daf2	40	120	0				1	100
WT daf2	42	120	0				1	100
WT daf2	45	120	0				1	100
		120	0				1	100
4OE daf2	0	117	0				1	100
4OE daf2	5	117	0				1	100
4OE daf2	7	117	0				1	100
4OE daf2	10	117	0				1	100
4OE daf2	12	117	0				1	100
4OE daf2	14	117	0				1	100
4OE daf2	17	117	0				1	100
4OE daf2	19	117	0				1	100
4OE daf2	21	117	0				1	100
4OE daf2	24	117	0				1	100
4OE daf2	26	117	0				1	100
4OE daf2	28	117	0				1	100
4OE daf2	31	117	0				1	100
4OE daf2	33	117	0				1	100
4OE daf2	35	117	0				1	100
4OE daf2	38	117	0				1	100
4OE daf2	40	117	0				1	100
4OE daf2	42	117	0				1	100
4OE daf2	45	117	0				1	100
		117	0				1	100
4KO daf2	0	59	0				1	100
4KO daf2	5	59	0				1	100
4KO daf2	7	59	0				1	100
4KO daf2	10	59	0				1	100
4KO daf2	12	59	0				1	100
4KO daf2	14	59	0				1	100
4KO daf2	17	59	0				1	100
4KO daf2	19	59	0				1	100
4KO daf2	21	59	0				1	100
4KO daf2	24	59	0				1	100
4KO daf2	26	59	0				1	100
4KO daf2	28	59	0				1	100
4KO daf2	31	59	0				1	100
4KO daf2	33	59	0				1	100
4KO daf2	35	59	0				1	100
4KO daf2	38	59	0				1	100
4KO daf2	40	59	0				1	100
4KO daf2	42	59	0				1	100
4KO daf2	45	59	0				1	100
4KO daf2	47	59	0				1	100
WT vhl1	0	111	0				1	100
WT vhl1	5	111	0				1	100
WT vhl1	7	111	0				1	100
WT vhl1	10	111	0				1	100
WT vhl1	12	111	0				1	100
WT vhl1	14	111	0				1	100
WT vhl1	17	111	0				1	100
WT vhl1	19	111	0				1	100
WT vhl1	21	111	0				1	100
WT vhl1	24	111	0				1	100
WT vhl1	26	111	0				1	100
WT vhl1	28	111	0				1	100
WT vhl1	31	111	0				1	100
WT vhl1	33	111	0				1	100
WT vhl1	35	111	0				1	100
WT vhl1	38	111	0				0.948718	94.8718
WT vhl1	40	111	0				0.948718	94.8718
WT vhl1	42	111	0				0.948718	94.8718
	45
4OE vhl1	0	108	0				1	100
4OE vhl1	5	108	0				1	100
4OE vhl1	7	108	0				1	100
4OE vhl1	10	108	0				1	100
4OE vhl1	12	108	0				1	100
4OE vhl1	14	108	0				1	100
4OE vhl1	17	108	0				1	100
4OE vhl1	19	108	0				1	100
4OE vhl1	21	108	0				1	100
4OE vhl1	24	108	0				1	100
4OE vhl1	26	108	0				1	100
4OE vhl1	28	108	0				1	100
4OE vhl1	31	108	0				1	100
4OE vhl1	33	108	0				1	100
4OE vhl1	35	108	0				1	100
4OE vhl1	38	108	0				1	100
4OE vhl1	40	108	0				1	100
4OE vhl1	42	108	0				1	100
4OE vhl1	45
4KO vhl1	0	109	0				1	100
4KO vhl1	5	109	0				1	100
4KO vhl1	7	109	0				1	100
4KO vhl1	10	109	0				1	100
4KO vhl1	12	109	0				1	100
4KO vhl1	14	109	0				1	100
4KO vhl1	17	109	0				1	100
4KO vhl1	19	109	0				1	100
4KO vhl1	21	109	0				1	100
4KO vhl1	24	109	0				1	100
4KO vhl1	26	109	0				1	100
4KO vhl1	28	109	0				1	100
4KO vhl1	31	109	0				1	100
4KO vhl1	33	109	0				1	100
4KO vhl1	35	109	0				1	100
4KO vhl1	38	109	0				1	100
4KO vhl1	40	109	0				1	100
4KO vhl1	42	109	0				1	100
4KO vhl1	45
WT rsks1	0	119	0				1	100
WT rsks1	5	119	0				1	100
WT rsks1	7	119	0				1	100
WT rsks1	10	119	0				1	100
WT rsks1	12	119	0				1	100
WT rsks1	14	119	0				1	100
WT rsks1	17	119	0				1	100
WT rsks1	19	119	0				1	100
WT rsks1	21	119	0				1	100
WT rsks1	24	119	0				1	100
WT rsks1	26	119	0				1	100
WT rsks1	28	119	0				1	100
WT rsks1	31	119	0				1	100
WT rsks1	33	119	0				1	100
WT rsks1	35	119	0				1	100
WT rsks1	38	119	0				1	100
WT rsks1	40	119	0				1	100
WT rsks1	42	119	0				1	100
WT rsks1	45	119	0				1	100
4OE rsks1	0	70	0				1	100
4OE rsks1	5	70	0				1	100
4OE rsks1	7	70	0				1	100
4OE rsks1	10	70	0				1	100
4OE rsks1	12	70	0				1	100
4OE rsks1	14	70	0				1	100
4OE rsks1	17	70	0				1	100
4OE rsks1	19	70	0				1	100
4OE rsks1	21	70	0				1	100
4OE rsks1	24	70	0				1	100
4OE rsks1	26	70	0				1	100
4OE rsks1	28	70	0				1	100
4OE rsks1	31	70	0				1	100
4OE rsks1	33	70	0				1	100
4OE rsks1	35	70	0				1	100
4OE rsks1	38	70	0				1	100
4OE rsks1	40	70	0				1	100
4OE rsks1	42	70	0				1	100
4OE rsks1	45
4KO rsks1	0	113	0				1	100
4KO rsks1	5	113	0				1	100
4KO rsks1	7	113	0				1	100
4KO rsks1	10	113	0				1	100
4KO rsks1	12	113	0				1	100
4KO rsks1	14	113	0				1	100
4KO rsks1	17	113	0				1	100
4KO rsks1	19	113	0				1	100
4KO rsks1	21	113	0				1	100
4KO rsks1	24	113	0				1	100
4KO rsks1	26	113	0				1	100
4KO rsks1	28	113	0				1	100
4KO rsks1	31	113	0				1	100
4KO rsks1	33	113	0				1	100
4KO rsks1	35	113	0				1	100
4KO rsks1	38	113	0				1	100
4KO rsks1	40	113	0				1	100
4KO rsks1	42	113	0			0	1	100
4KO rsks1	45
4KO sams1	0	83	0			0	1	100
4KO sams1	5	83	0			0	1	100
4KO sams1	7	83	0			0	1	100
4KO sams1	10	83	0			0	1	100
4KO sams1	12	83	0			0	1	100
4KO sams1	14	83	0			0	1	100
4KO sams1	17	83	0			0	1	100
4KO sams1	19	83	0			0	1	100
4KO sams1	21	83	0			0	1	100
4KO sams1	24	83	0			0	1	100
4KO sams1	26	83	0			0	1	100
4KO sams1	28	83	0			0	1	100
4KO sams1	31	83	0			0	1	100
4KO sams1	33	83	0			0	1	100
4KO sams1	35	83	0			0	1	100
4KO sams1	38	83	0			0	1	100
4KO sams1	40	83	0			0	1	100
4KO sams1	42	83	0			0	1	100
4KO sams1	45	134	0			0	1	100
1OE sams1	0	114	0			0	1	100
1OE sams1	5	114	0			0	1	100
1OE sams1	7	114	0			0	1	100
1OE sams1	10	114	0			0	1	100
1OE sams1	12	114	0			0	1	100
1OE sams1	14	114	0			0	1	100
1OE sams1	17	114	0			0	1	100
1OE sams1	19	114	0			0	1	100
1OE sams1	21	114	0			0	1	100
1OE sams1	24	114	0			0	1	100
1OE sams1	26	114	0			0	1	100
1OE sams1	28	114	0			0	1	100
1OE sams1	31	114	0			0	1	100
1OE sams1	33	114	0			0	1	100
1OE sams1	35	114	0			0	1	100
1OE sams1	38	114	0			0	1	100
1OE sams1	40	114	0			0	1	100
1OE sams1	42	114	0			0	1	100
1OE sams1	45	114	0			0	1	100
1KO sams1	0	83	0			0	1	100
1KO sams1	5	83	0			0	1	100
1KO sams1	7	83	0			0	1	100
1KO sams1	9	83	0			0	1	100
1KO sams1	13	83	0			0	1	100
1KO sams1	15	83	0			0	1	100
1KO sams1	17	83	0			0	1	100
1KO sams1	20	83	0			0	1	100
1KO sams1	22	83	0			0	1	100
1KO sams1	24	83	0			0	1	100
1KO sams1	27	83	0			0	1	100
1KO sams1	29	83	0			0	1	100
1KO sams1	31	83	0			0	1	100
1KO sams1	34	83	0			0	1	100
1KO sams1	36	83	0			0	1	100
1KO sams1	38	83	0			0	1	100
1KO sams1	41	83	0			0	1	100
1KO sams1	43	83	0			0	1	100
1KO sams1	45	83	0			0	1	100
							0

## Sheet: stats
% WT [124]
#days	dead	censored
0
5
7
10	0
12	1
14	3
17	11
19	15
21	37
24	33
26	17
28	6
31	1
33
35
38
40
% fmo-4 OE ubiq [110]
#days	dead	censored
0
5
7
10	0
12	0
14	0
17	3
19	11
21	20
24	21
26	22
28	15
31	10
33	4
35	4
38
40
% fmo-4 OE hyp sp 6.3 [117]
#days	dead	censored
0
5
7
10	0
12	0
14	0
17	4
19	8
21	21
24	23
26	20
28	21
31	8
33	9
35	3
38
40
% fmo-4 KO [95]
#days	dead	censored
0
5
7
10	0
12	1
14	4
17	10
19	16
21	29
24	20
26	10
28	5
31
33
35
38
40

## Sheet: analysis
condition	chi	pvalue	corrected_pvalue
WT v.s. fmo-4 OE ubiq	34.11	5.2e-09	1.6e-08
WT v.s. fmo-4 OE hyp sp 6.3	42.68	0	0
WT v.s. fmo-4 KO	1.68	0.1948	0.5845
fmo-4 OE ubiq v.s. WT	34.11	5.2e-09	1.6e-08
fmo-4 OE ubiq v.s. fmo-4 OE hyp sp 6.3	0.27	0.6008	1
fmo-4 OE ubiq v.s. fmo-4 KO	39.75	0	0
fmo-4 OE hyp sp 6.3 v.s. WT	42.68	0	0
fmo-4 OE hyp sp 6.3 v.s. fmo-4 OE ubiq	0.27	0.6008	1
fmo-4 OE hyp sp 6.3 v.s. fmo-4 KO	47.87	0	0
fmo-4 KO v.s. WT	1.68	0.1948	0.5845
fmo-4 KO v.s. fmo-4 OE ubiq	39.75	0	0
fmo-4 KO v.s. fmo-4 OE hyp sp 6.3	47.87	0	0

## Sheet: Sheet1
#1	N2								#1	N2					#1	N2
#2	Lei42	fmo-2p::MC; unc-119p::HIF-1(P621A); JT307 #1							#2	Lei42	fmo-2p::MC; unc-119p::HIF-1(P621A); JT307 #1				#11L	Lei51	fmo-2p::MC; JT307; gcy-31; gcy-36 - XA2262 sibling #1
#3	Lei43	fmo-2p::MC; unc-119p::HIF-1(P621A); JT307 #2							#3	Lei43	fmo-2p::MC; unc-119p::HIF-1(P621A); JT307 #2				#12L	Lei52	fmo-2p::MC; JT307; gcy-33; gcy-36 - XA2262 sibling #1
#4	Lei44	fmo-2p::MC; TU3311; CB5602 #1							#4	Lei44	fmo-2p::MC; TU3311; CB5602 #1				#13	Lei53	fmo-2p::MC; JT307; gcy-33; gcy-36 - XA2262 sibling #2
#5	Lei45	fmo-2p::MC; TU3311 #1							#5	Lei45	fmo-2p::MC; TU3311 #1				#14L	Lei55	fmo-2p::MC; JT307 - XA2262 sibling #1
#6	Lei46	fmo-2p::MC; CB5602 #1							#6	Lei46	fmo-2p::MC; CB5602 #1				#15L	Lei56	fmo-2p::MC; JT307 - XA2262 sibling #2
#7	Lei47	fmo-2p::MC; TU3311; CB5602 #2							#7	Lei47	fmo-2p::MC; TU3311; CB5602 #2				#16	Lei57	fmo-2p::MC - XA2262 sibling #1
#8L	Lei48	fmo-2p::MC; JT307; XA2262 #1													#17	Lei58	fmo-2p::MC - XA2262 sibling #2
#9	Lei49	fmo-2p::MC; JT307; XA2262 #2													#18	Lei59	fmo-2p::MC; gcy-33; gcy-36 - XA2262 sibling #1
#10L	Lei50	fmo-2p::MC; JT307; XA2262 #3							#1	N2					#19	Lei60	fmo-2p::MC; gcy-33; gcy-36 - XA2262 sibling #2
#11L	Lei51	fmo-2p::MC; JT307; gcy-31; gcy-36 - XA2262 sibling #1							#8L	Lei48	fmo-2p::MC; JT307; XA2262 #1
#12L	Lei52	fmo-2p::MC; JT307; gcy-33; gcy-36 - XA2262 sibling #1							#9	Lei49	fmo-2p::MC; JT307; XA2262 #2
#13	Lei53	fmo-2p::MC; JT307; gcy-33; gcy-36 - XA2262 sibling #2							#10L	Lei50	fmo-2p::MC; JT307; XA2262 #3
#14L	Lei55	fmo-2p::MC; JT307 - XA2262 sibling #1							#14L	Lei55	fmo-2p::MC; JT307 - XA2262 sibling #1
#15L	Lei56	fmo-2p::MC; JT307 - XA2262 sibling #2							#15L	Lei56	fmo-2p::MC; JT307 - XA2262 sibling #2
#16	Lei57	fmo-2p::MC - XA2262 sibling #1							#16	Lei57	fmo-2p::MC - XA2262 sibling #1
#17	Lei58	fmo-2p::MC - XA2262 sibling #2							#17	Lei58	fmo-2p::MC - XA2262 sibling #2
#18	Lei59	fmo-2p::MC; gcy-33; gcy-36 - XA2262 sibling #1							#20	Lei61	fmo-2p::MC; XA2262 #1
#19	Lei60	fmo-2p::MC; gcy-33; gcy-36 - XA2262 sibling #2							#21	Lei62	fmo-2p::MC; XA2262 #2
#20	Lei61	fmo-2p::MC; XA2262 #1
#21	Lei62	fmo-2p::MC; XA2262 #2
