# Supplementary material for: fmo-4 promotes longevity and stress resistance via ER to mitochondria calcium regulation in C. elegans
Source: eLife journal article supplement (doi:10.7554/elife.99971), 2024-08-27
Supplement: fig4-data1 [file 22MAY2023 4OE hyp specific lifespan.xlsx]

## Sheet: lifespan
strain	day	alive	dead-total	dead-normal	dead-ruptured	censored	ratio-alive	percentage-alive
N2	0	97	0				1	100
N2	5	97	0				1	100
N2	7	97	0				1	100						1	2	3	4	5	6	7	8	9	10	11	12	13	14	15
N2	10	97	0	0			1	100			plot data here-->		day	WT	FMO-4 OE	FMO-4 OE Hyp Sp	FMO-4 OE Hyp 2.6	FMO-4 KO
N2	12	94	3	3			0.969072	96.9072				0	0	100	100	100	100	100
N2	14	91	6	3			0.938144	93.8144				5	5	100	100	100	100	100
N2	17	82	15	9			0.845361	84.5361				7	7	100	100	100	100	100
N2	19	72	25	10			0.742268	74.2268				10	10	100	100	100	100	100
N2	21	49	48	23			0.505155	50.5155				12	12	96.9072	100	100	100	94.8276
N2	24	23	74	26			0.237113	23.7113				14	14	93.8144	100	97.8723	97.9592	91.3793
N2	26	16	81	7			0.164948	16.4948				17	17	84.5361	95.1456	94.6809	91.8367	81.8966
N2	28	7	90	9			0.0721649	7.21649				19	19	74.2268	90.2913	88.2979	85.7143	71.5517
N2	31	2	95	5			0.0206186	2.06186				21	21	50.5155	82.5243	80.8511	76.5306	59.4828
N2	33	0	97	2			0	0				24	24	23.7113	66.0194	62.766	59.1837	31.8966
N2	35	0	97				0	0				26	26	16.4948	48.5437	46.8085	46.9388	13.7931
N2	38	0	97				0	0				28	28	7.21649	27.1845	26.5957	23.4694	3.44828
N2	40	0	97				0	0				31	31	2.06186	10.6796	14.8936	12.2449	0
N2	42	0	97				0	0				33	33	0	4.85437	11.7021	9.18367
N2	45	0	97				0	0				35	35		0.970874	6.38298	5.10204
												38	38		0	0	0
4OE	0	103	0				1	100				40	40
4OE	5	103	0				1	100				42	42
4OE	7	103	0				1	100				45	45
4OE	10	103	0	0			1	100				47	47
4OE	12	103	0	0			1	100
4OE	14	103	0	0			1	100
4OE	17	98	5	5			0.951456	95.1456
4OE	19	93	10	5			0.902913	90.2913
4OE	21	85	18	8			0.825243	82.5243
4OE	24	68	35	17			0.660194	66.0194
4OE	26	50	53	18			0.485437	48.5437
4OE	28	28	75	22			0.271845	27.1845
4OE	31	11	92	17			0.106796	10.6796
4OE	33	5	98	6			0.0485437	4.85437
4OE	35	1	102	4			0.00970874	0.970874
4OE	38	0	103	1			0	0
4OE	40	0	103				0	0
4OE	42	0	103				0	0
4OE	45	0	103				0	0
4OE 6.3	0	94	0				1	100
4OE 6.3	5	94	0				1	100
4OE 6.3	7	94	0				1	100
4OE 6.3	10	94	0	0			1	100
4OE 6.3	12	94	0	0			1	100
4OE 6.3	14	92	2	2			0.978723	97.8723
4OE 6.3	17	89	5	3			0.946809	94.6809
4OE 6.3	19	83	11	6			0.882979	88.2979
4OE 6.3	21	76	18	7			0.808511	80.8511
4OE 6.3	24	59	35	17			0.62766	62.766
4OE 6.3	26	44	50	15			0.468085	46.8085
4OE 6.3	28	25	69	19			0.265957	26.5957
4OE 6.3	31	14	80	11			0.148936	14.8936
4OE 6.3	33	11	83	3			0.117021	11.7021
4OE 6.3	35	6	88	5			0.0638298	6.38298
4OE 6.3	38	0	94	6			0	0
4OE 6.3	40	0	94				0	0
4OE 6.3	42	0	94				0	0
4OE 6.3	45	0	94				0	0
4OE 2.6	0	98	0				1	100
4OE 2.6	5	98	0				1	100
4OE 2.6	7	98	0				1	100
4OE 2.6	10	98	0	0			1	100
4OE 2.6	12	98	0	0			1	100
4OE 2.6	14	96	2	2			0.979592	97.9592
4OE 2.6	17	90	8	6			0.918367	91.8367
4OE 2.6	19	84	14	6			0.857143	85.7143
4OE 2.6	21	75	23	9			0.765306	76.5306
4OE 2.6	24	58	40	17			0.591837	59.1837
4OE 2.6	26	46	52	12			0.469388	46.9388
4OE 2.6	28	23	75	23			0.234694	23.4694
4OE 2.6	31	12	86	11			0.122449	12.2449
4OE 2.6	33	9	89	3			0.0918367	9.18367
4OE 2.6	35	5	93	4			0.0510204	5.10204
4OE 2.6	38	0	98	5			0	0
4OE 2.6	40	0	98				0	0
4OE 2.6	42	0	98				0	0
4OE 2.6	45	0	98				0	0
4KO	0	116	0				1	100
4KO	5	116	0				1	100
4KO	7	116	0				1	100
4KO	10	116	0	0			1	100
4KO	12	110	6	6			0.948276	94.8276
4KO	14	106	10	4			0.913793	91.3793
4KO	17	95	21	11			0.818966	81.8966
4KO	19	83	33	12			0.715517	71.5517
4KO	21	69	47	14			0.594828	59.4828
4KO	24	37	79	32			0.318966	31.8966
4KO	26	16	100	21			0.137931	13.7931
4KO	28	4	112	12			0.0344828	3.44828
4KO	31	0	116	4			0	0
4KO	33	0	116				0	0
4KO	35	0	116				0	0
4KO	38	0	116				0	0
4KO	40	0	116				0	0
4KO	42	0	116				0	0
4KO	45	0	116				0	0
	0	104	0				1	100
	5	104	0				1	100
	7	104	0				1	100
	10	104	0				1	100
	12	104	0				1	100
	14	104	0				1	100
	17	104	0				1	100
	19	104	0				1	100
	21	104	0				1	100
	24	104	0				1	100
	26	104	0				1	100
	28	104	0				1	100
	31	104	0				1	100
	33	104	0				1	100
4KO atf6	35	104	0				1	100
4KO atf6	38	104	0				1	100
4KO atf6	40	104	0				1	100
4KO atf6	42	104	0				1	100
4KO atf6	45	104	0				1	100
WT daf2	0	120	0				1	100
WT daf2	5	120	0				1	100
WT daf2	7	120	0				1	100
WT daf2	10	120	0				1	100
WT daf2	12	120	0				1	100
WT daf2	14	120	0				1	100
WT daf2	17	120	0				1	100
WT daf2	19	120	0				1	100
WT daf2	21	120	0				1	100
WT daf2	24	120	0				1	100
WT daf2	26	120	0				1	100
WT daf2	28	120	0				1	100
WT daf2	31	120	0				1	100
WT daf2	33	120	0				1	100
WT daf2	35	120	0				1	100
WT daf2	38	120	0				1	100
WT daf2	40	120	0				1	100
WT daf2	42	120	0				1	100
WT daf2	45	120	0				1	100
		120	0				1	100
4OE daf2	0	117	0				1	100
4OE daf2	5	117	0				1	100
4OE daf2	7	117	0				1	100
4OE daf2	10	117	0				1	100
4OE daf2	12	117	0				1	100
4OE daf2	14	117	0				1	100
4OE daf2	17	117	0				1	100
4OE daf2	19	117	0				1	100
4OE daf2	21	117	0				1	100
4OE daf2	24	117	0				1	100
4OE daf2	26	117	0				1	100
4OE daf2	28	117	0				1	100
4OE daf2	31	117	0				1	100
4OE daf2	33	117	0				1	100
4OE daf2	35	117	0				1	100
4OE daf2	38	117	0				1	100
4OE daf2	40	117	0				1	100
4OE daf2	42	117	0				1	100
4OE daf2	45	117	0				1	100
		117	0				1	100
4KO daf2	0	59	0				1	100
4KO daf2	5	59	0				1	100
4KO daf2	7	59	0				1	100
4KO daf2	10	59	0				1	100
4KO daf2	12	59	0				1	100
4KO daf2	14	59	0				1	100
4KO daf2	17	59	0				1	100
4KO daf2	19	59	0				1	100
4KO daf2	21	59	0				1	100
4KO daf2	24	59	0				1	100
4KO daf2	26	59	0				1	100
4KO daf2	28	59	0				1	100
4KO daf2	31	59	0				1	100
4KO daf2	33	59	0				1	100
4KO daf2	35	59	0				1	100
4KO daf2	38	59	0				1	100
4KO daf2	40	59	0				1	100
4KO daf2	42	59	0				1	100
4KO daf2	45	59	0				1	100
4KO daf2	47	59	0				1	100
WT vhl1	0	111	0				1	100
WT vhl1	5	111	0				1	100
WT vhl1	7	111	0				1	100
WT vhl1	10	111	0				1	100
WT vhl1	12	111	0				1	100
WT vhl1	14	111	0				1	100
WT vhl1	17	111	0				1	100
WT vhl1	19	111	0				1	100
WT vhl1	21	111	0				1	100
WT vhl1	24	111	0				1	100
WT vhl1	26	111	0				1	100
WT vhl1	28	111	0				1	100
WT vhl1	31	111	0				1	100
WT vhl1	33	111	0				1	100
WT vhl1	35	111	0				1	100
WT vhl1	38	111	0				0.948718	94.8718
WT vhl1	40	111	0				0.948718	94.8718
WT vhl1	42	111	0				0.948718	94.8718
	45
4OE vhl1	0	108	0				1	100
4OE vhl1	5	108	0				1	100
4OE vhl1	7	108	0				1	100
4OE vhl1	10	108	0				1	100
4OE vhl1	12	108	0				1	100
4OE vhl1	14	108	0				1	100
4OE vhl1	17	108	0				1	100
4OE vhl1	19	108	0				1	100
4OE vhl1	21	108	0				1	100
4OE vhl1	24	108	0				1	100
4OE vhl1	26	108	0				1	100
4OE vhl1	28	108	0				1	100
4OE vhl1	31	108	0				1	100
4OE vhl1	33	108	0				1	100
4OE vhl1	35	108	0				1	100
4OE vhl1	38	108	0				1	100
4OE vhl1	40	108	0				1	100
4OE vhl1	42	108	0				1	100
4OE vhl1	45
4KO vhl1	0	109	0				1	100
4KO vhl1	5	109	0				1	100
4KO vhl1	7	109	0				1	100
4KO vhl1	10	109	0				1	100
4KO vhl1	12	109	0				1	100
4KO vhl1	14	109	0				1	100
4KO vhl1	17	109	0				1	100
4KO vhl1	19	109	0				1	100
4KO vhl1	21	109	0				1	100
4KO vhl1	24	109	0				1	100
4KO vhl1	26	109	0				1	100
4KO vhl1	28	109	0				1	100
4KO vhl1	31	109	0				1	100
4KO vhl1	33	109	0				1	100
4KO vhl1	35	109	0				1	100
4KO vhl1	38	109	0				1	100
4KO vhl1	40	109	0				1	100
4KO vhl1	42	109	0				1	100
4KO vhl1	45
WT rsks1	0	119	0				1	100
WT rsks1	5	119	0				1	100
WT rsks1	7	119	0				1	100
WT rsks1	10	119	0				1	100
WT rsks1	12	119	0				1	100
WT rsks1	14	119	0				1	100
WT rsks1	17	119	0				1	100
WT rsks1	19	119	0				1	100
WT rsks1	21	119	0				1	100
WT rsks1	24	119	0				1	100
WT rsks1	26	119	0				1	100
WT rsks1	28	119	0				1	100
WT rsks1	31	119	0				1	100
WT rsks1	33	119	0				1	100
WT rsks1	35	119	0				1	100
WT rsks1	38	119	0				1	100
WT rsks1	40	119	0				1	100
WT rsks1	42	119	0				1	100
WT rsks1	45	119	0				1	100
4OE rsks1	0	70	0				1	100
4OE rsks1	5	70	0				1	100
4OE rsks1	7	70	0				1	100
4OE rsks1	10	70	0				1	100
4OE rsks1	12	70	0				1	100
4OE rsks1	14	70	0				1	100
4OE rsks1	17	70	0				1	100
4OE rsks1	19	70	0				1	100
4OE rsks1	21	70	0				1	100
4OE rsks1	24	70	0				1	100
4OE rsks1	26	70	0				1	100
4OE rsks1	28	70	0				1	100
4OE rsks1	31	70	0				1	100
4OE rsks1	33	70	0				1	100
4OE rsks1	35	70	0				1	100
4OE rsks1	38	70	0				1	100
4OE rsks1	40	70	0				1	100
4OE rsks1	42	70	0				1	100
4OE rsks1	45
4KO rsks1	0	113	0				1	100
4KO rsks1	5	113	0				1	100
4KO rsks1	7	113	0				1	100
4KO rsks1	10	113	0				1	100
4KO rsks1	12	113	0				1	100
4KO rsks1	14	113	0				1	100
4KO rsks1	17	113	0				1	100
4KO rsks1	19	113	0				1	100
4KO rsks1	21	113	0				1	100
4KO rsks1	24	113	0				1	100
4KO rsks1	26	113	0				1	100
4KO rsks1	28	113	0				1	100
4KO rsks1	31	113	0				1	100
4KO rsks1	33	113	0				1	100
4KO rsks1	35	113	0				1	100
4KO rsks1	38	113	0				1	100
4KO rsks1	40	113	0				1	100
4KO rsks1	42	113	0			0	1	100
4KO rsks1	45
4KO sams1	0	83	0			0	1	100
4KO sams1	5	83	0			0	1	100
4KO sams1	7	83	0			0	1	100
4KO sams1	10	83	0			0	1	100
4KO sams1	12	83	0			0	1	100
4KO sams1	14	83	0			0	1	100
4KO sams1	17	83	0			0	1	100
4KO sams1	19	83	0			0	1	100
4KO sams1	21	83	0			0	1	100
4KO sams1	24	83	0			0	1	100
4KO sams1	26	83	0			0	1	100
4KO sams1	28	83	0			0	1	100
4KO sams1	31	83	0			0	1	100
4KO sams1	33	83	0			0	1	100
4KO sams1	35	83	0			0	1	100
4KO sams1	38	83	0			0	1	100
4KO sams1	40	83	0			0	1	100
4KO sams1	42	83	0			0	1	100
4KO sams1	45	134	0			0	1	100
1OE sams1	0	114	0			0	1	100
1OE sams1	5	114	0			0	1	100
1OE sams1	7	114	0			0	1	100
1OE sams1	10	114	0			0	1	100
1OE sams1	12	114	0			0	1	100
1OE sams1	14	114	0			0	1	100
1OE sams1	17	114	0			0	1	100
1OE sams1	19	114	0			0	1	100
1OE sams1	21	114	0			0	1	100
1OE sams1	24	114	0			0	1	100
1OE sams1	26	114	0			0	1	100
1OE sams1	28	114	0			0	1	100
1OE sams1	31	114	0			0	1	100
1OE sams1	33	114	0			0	1	100
1OE sams1	35	114	0			0	1	100
1OE sams1	38	114	0			0	1	100
1OE sams1	40	114	0			0	1	100
1OE sams1	42	114	0			0	1	100
1OE sams1	45	114	0			0	1	100
1KO sams1	0	83	0			0	1	100
1KO sams1	5	83	0			0	1	100
1KO sams1	7	83	0			0	1	100
1KO sams1	9	83	0			0	1	100
1KO sams1	13	83	0			0	1	100
1KO sams1	15	83	0			0	1	100
1KO sams1	17	83	0			0	1	100
1KO sams1	20	83	0			0	1	100
1KO sams1	22	83	0			0	1	100
1KO sams1	24	83	0			0	1	100
1KO sams1	27	83	0			0	1	100
1KO sams1	29	83	0			0	1	100
1KO sams1	31	83	0			0	1	100
1KO sams1	34	83	0			0	1	100
1KO sams1	36	83	0			0	1	100
1KO sams1	38	83	0			0	1	100
1KO sams1	41	83	0			0	1	100
1KO sams1	43	83	0			0	1	100
1KO sams1	45	83	0			0	1	100
							0

## Sheet: stats
% WT [97]
#days	dead	censored
0
5
7
10	0
12	3
14	3
17	9
19	10
21	23
24	26
26	7
28	9
31	5
33	2
35
38
40
% fmo-4 OE ubiq [103]
#days	dead	censored
0
5
7
10	0
12	0
14	0
17	5
19	5
21	8
24	17
26	18
28	22
31	17
33	6
35	4
38	1
40
% fmo-4 OE hyp sp 6.3 [94]
#days	dead	censored
0
5
7
10	0
12	0
14	2
17	3
19	6
21	7
24	17
26	15
28	19
31	11
33	3
35	5
38	6
40
% fmo-4 KO [116]
#days	dead	censored
0
5
7
10	0
12	6
14	4
17	11
19	12
21	14
24	32
26	21
28	12
31	4
33
35
38
40

## Sheet: analysis
condition	chi	pvalue	corrected_pvalue
WT v.s. fmo-4 OE ubiq	34.68	3.9e-09	1.2e-08
WT v.s. fmo-4 OE hyp sp 6.3	32.31	1.3e-08	4e-08
WT v.s. fmo-4 KO	0	0.9982	1
fmo-4 OE ubiq v.s. WT	34.68	3.9e-09	1.2e-08
fmo-4 OE ubiq v.s. fmo-4 OE hyp sp 6.3	0.5	0.4804	1
fmo-4 OE ubiq v.s. fmo-4 KO	42.59	0	0
fmo-4 OE hyp sp 6.3 v.s. WT	32.31	1.3e-08	4e-08
fmo-4 OE hyp sp 6.3 v.s. fmo-4 OE ubiq	0.5	0.4804	1
fmo-4 OE hyp sp 6.3 v.s. fmo-4 KO	37.19	0	0
fmo-4 KO v.s. WT	0	0.9982	1
fmo-4 KO v.s. fmo-4 OE ubiq	42.59	0	0
fmo-4 KO v.s. fmo-4 OE hyp sp 6.3	37.19	0	0

## Sheet: Sheet1
#1	N2								#1	N2					#1	N2
#2	Lei42	fmo-2p::MC; unc-119p::HIF-1(P621A); JT307 #1							#2	Lei42	fmo-2p::MC; unc-119p::HIF-1(P621A); JT307 #1				#11L	Lei51	fmo-2p::MC; JT307; gcy-31; gcy-36 - XA2262 sibling #1
#3	Lei43	fmo-2p::MC; unc-119p::HIF-1(P621A); JT307 #2							#3	Lei43	fmo-2p::MC; unc-119p::HIF-1(P621A); JT307 #2				#12L	Lei52	fmo-2p::MC; JT307; gcy-33; gcy-36 - XA2262 sibling #1
#4	Lei44	fmo-2p::MC; TU3311; CB5602 #1							#4	Lei44	fmo-2p::MC; TU3311; CB5602 #1				#13	Lei53	fmo-2p::MC; JT307; gcy-33; gcy-36 - XA2262 sibling #2
#5	Lei45	fmo-2p::MC; TU3311 #1							#5	Lei45	fmo-2p::MC; TU3311 #1				#14L	Lei55	fmo-2p::MC; JT307 - XA2262 sibling #1
#6	Lei46	fmo-2p::MC; CB5602 #1							#6	Lei46	fmo-2p::MC; CB5602 #1				#15L	Lei56	fmo-2p::MC; JT307 - XA2262 sibling #2
#7	Lei47	fmo-2p::MC; TU3311; CB5602 #2							#7	Lei47	fmo-2p::MC; TU3311; CB5602 #2				#16	Lei57	fmo-2p::MC - XA2262 sibling #1
#8L	Lei48	fmo-2p::MC; JT307; XA2262 #1													#17	Lei58	fmo-2p::MC - XA2262 sibling #2
#9	Lei49	fmo-2p::MC; JT307; XA2262 #2													#18	Lei59	fmo-2p::MC; gcy-33; gcy-36 - XA2262 sibling #1
#10L	Lei50	fmo-2p::MC; JT307; XA2262 #3							#1	N2					#19	Lei60	fmo-2p::MC; gcy-33; gcy-36 - XA2262 sibling #2
#11L	Lei51	fmo-2p::MC; JT307; gcy-31; gcy-36 - XA2262 sibling #1							#8L	Lei48	fmo-2p::MC; JT307; XA2262 #1
#12L	Lei52	fmo-2p::MC; JT307; gcy-33; gcy-36 - XA2262 sibling #1							#9	Lei49	fmo-2p::MC; JT307; XA2262 #2
#13	Lei53	fmo-2p::MC; JT307; gcy-33; gcy-36 - XA2262 sibling #2							#10L	Lei50	fmo-2p::MC; JT307; XA2262 #3
#14L	Lei55	fmo-2p::MC; JT307 - XA2262 sibling #1							#14L	Lei55	fmo-2p::MC; JT307 - XA2262 sibling #1
#15L	Lei56	fmo-2p::MC; JT307 - XA2262 sibling #2							#15L	Lei56	fmo-2p::MC; JT307 - XA2262 sibling #2
#16	Lei57	fmo-2p::MC - XA2262 sibling #1							#16	Lei57	fmo-2p::MC - XA2262 sibling #1
#17	Lei58	fmo-2p::MC - XA2262 sibling #2							#17	Lei58	fmo-2p::MC - XA2262 sibling #2
#18	Lei59	fmo-2p::MC; gcy-33; gcy-36 - XA2262 sibling #1							#20	Lei61	fmo-2p::MC; XA2262 #1
#19	Lei60	fmo-2p::MC; gcy-33; gcy-36 - XA2262 sibling #2							#21	Lei62	fmo-2p::MC; XA2262 #2
#20	Lei61	fmo-2p::MC; XA2262 #1
#21	Lei62	fmo-2p::MC; XA2262 #2
