# Supplementary material for: fmo-4 promotes longevity and stress resistance via ER to mitochondria calcium regulation in C. elegans
Source: eLife journal article supplement (doi:10.7554/elife.99971), 2024-08-27
Supplement: fig4-data1 [file elife-99971-fig4-data1-v1.zip]

## Sheet: lifespan
strain	day	alive	dead-total	dead-normal	dead-ruptured	censored	ratio-alive	percentage-alive
N2 EV	0	100	0				1	100
N2 EV	5	100	0				1	100
N2 EV	7	100	0				1	100						1	2	3	4	5	6	7	8	9	10	11	12	13	14	15
N2 EV	10	100	0	0			1	100			plot data here-->		day	WT EV	FMO-4 OE hyp sp EV	FMO-4 KO EV	WT; vdac-1 RNAi	FMO-4 OE hyp sp; vdac-1 RNAi	FMO-4 KO; vdac-1 RNAi
N2 EV	12	93	7	7			0.93	93				0	0	100	100	100	100	100	100
N2 EV	14	84	16	9			0.84	84				5	5	100	100	100	100	100	100
N2 EV	17	65	35	19			0.65	65				7	7	100	100	100	100	100	100
N2 EV	19	54	46	11			0.54	54				10	10	100	100	100	100	100	100
N2 EV	21	37	63	17			0.37	37				12	12	93	97.8261	90.4762	94.958	94.9153	92.3077
N2 EV	24	18	82	19			0.18	18				14	14	84	91.3043	78.5714	92.437	91.5254	84.6154
N2 EV	26	6	94	12			0.06	6				17	17	65	78.2609	52.381	87.395	84.7458	73.0769
N2 EV	28	0	100	6			0	0				19	19	54	61.9565	30.9524	81.5126	79.661	61.5385
N2 EV	31	0	100				0	0				21	21	37	50	11.9048	73.9496	72.8814	47.4359
N2 EV	33	0	100				0	0				24	24	18	27.1739	0	53.7815	54.2373	30.7692
N2 EV	35	0	100				0	0				26	26	6	11.9565		42.0168	40.678	23.0769
N2 EV	38	0	100				0	0				28	28	0	8.69565		29.4118	30.5085	15.3846
N2 EV	40	0	100				0	0				31	31		3.26087		8.40336	16.9492	3.84615
N2 EV	42	0	100				0	0				33	33		0		1.68067	5.08475	0
N2 EV	45	0	100				0	0				35	35				0.840336	1.69492
												38	38				0	0
4OE EV	0	92	0				1	100				40	40
4OE EV	5	92	0				1	100				42	42
4OE EV	7	92	0				1	100				45	45
4OE EV	10	92	0	0			1	100
4OE EV	12	90	2	2			0.978261	97.8261
4OE EV	14	84	8	6			0.913043	91.3043
4OE EV	17	72	20	12			0.782609	78.2609
4OE EV	19	57	35	15			0.619565	61.9565
4OE EV	21	46	46	11			0.5	50
4OE EV	24	25	67	21			0.271739	27.1739
4OE EV	26	11	81	14			0.119565	11.9565
4OE EV	28	8	84	3			0.0869565	8.69565
4OE EV	31	3	89	5			0.0326087	3.26087
4OE EV	33	0	92	3			0	0
4OE EV	35	0	92				0	0
4OE EV	38	0	92				0	0
4OE EV	40	0	92				0	0
4OE EV	42	0	92				0	0
4OE EV	45	0	92				0	0
4KO EV	0	84	0				1	100
4KO EV	5	84	0				1	100
4KO EV	7	84	0				1	100
4KO EV	10	84	0	0			1	100
4KO EV	12	76	8	8			0.904762	90.4762
4KO EV	14	66	18	10			0.785714	78.5714
4KO EV	17	44	40	22			0.52381	52.381
4KO EV	19	26	58	18			0.309524	30.9524
4KO EV	21	10	74	16			0.119048	11.9048
4KO EV	24	0	84	10			0	0
4KO EV	26	0	84				0	0
4KO EV	28	0	84				0	0
4KO EV	31	0	84				0	0
4KO EV	33	0	84				0	0
4KO EV	35	0	84				0	0
4KO EV	38	0	84				0	0
4KO EV	40	0	84				0	0
4KO EV	42	0	84				0	0
4KO EV	45	0	84				0	0
WT VDAC	0	119	0				1	100
WT VDAC	5	119	0				1	100
WT VDAC	7	119	0				1	100
WT VDAC	10	119	0	0			1	100
WT VDAC	12	113	6	6			0.94958	94.958
WT VDAC	14	110	9	3			0.92437	92.437
WT VDAC	17	104	15	6			0.87395	87.395
WT VDAC	19	97	22	7			0.815126	81.5126
WT VDAC	21	88	31	9			0.739496	73.9496
WT VDAC	24	64	55	24			0.537815	53.7815
WT VDAC	26	50	69	14			0.420168	42.0168
WT VDAC	28	35	84	15			0.294118	29.4118
WT VDAC	31	10	109	25			0.0840336	8.40336
WT VDAC	33	2	117	8			0.0168067	1.68067
WT VDAC	35	1	118	1			0.00840336	0.840336
WT VDAC	38	0	119	1			0	0
WT VDAC	40	0	119				0	0
WT VDAC	42	0	119				0	0
WT VDAC	45	0	119				0	0
4OE VDAC	0	59	0				1	100
4OE VDAC	5	59	0				1	100
4OE VDAC	7	59	0				1	100
4OE VDAC	10	59	0	0			1	100
4OE VDAC	12	56	3	3			0.949153	94.9153
4OE VDAC	14	54	5	2			0.915254	91.5254
4OE VDAC	17	50	9	4			0.847458	84.7458
4OE VDAC	19	47	12	3			0.79661	79.661
4OE VDAC	21	43	16	4			0.728814	72.8814
4OE VDAC	24	32	27	11			0.542373	54.2373
4OE VDAC	26	24	35	8			0.40678	40.678
4OE VDAC	28	18	41	6			0.305085	30.5085
4OE VDAC	31	10	49	8			0.169492	16.9492
4OE VDAC	33	3	56	7			0.0508475	5.08475
4OE VDAC	35	1	58	2			0.0169492	1.69492
4OE VDAC	38	0	59	1			0	0
4OE VDAC	40	0	59				0	0
4OE VDAC	42	0	59				0	0
4OE VDAC	45	0	59				0	0
4KO VDAC	0	78	0				1	100
4KO VDAC	5	78	0				1	100
4KO VDAC	7	78	0				1	100
4KO VDAC	10	78	0	0			1	100
4KO VDAC	12	72	6	6			0.923077	92.3077
4KO VDAC	14	66	12	6			0.846154	84.6154
4KO VDAC	17	57	21	9			0.730769	73.0769
4KO VDAC	19	48	30	9			0.615385	61.5385
4KO VDAC	21	37	41	11			0.474359	47.4359
4KO VDAC	24	24	54	13			0.307692	30.7692
4KO VDAC	26	18	60	6			0.230769	23.0769
4KO VDAC	28	12	66	6			0.153846	15.3846
4KO VDAC	31	3	75	9			0.0384615	3.84615
4KO VDAC	33	0	78	3			0	0
4KO VDAC	35	0	78				0	0
4KO VDAC	38	0	78				0	0
4KO VDAC	40	0	78				0	0
4KO VDAC	42	0	78				0	0
4KO VDAC	45	0	78				0	0
WT ire1	0	114	0				1	100
WT ire1	5	114	0				1	100
WT ire1	7	114	0				1	100
WT ire1	10	114	0				1	100
WT ire1	12	114	0				1	100
WT ire1	14	114	0				1	100
WT ire1	17	114	0				1	100
WT ire1	19	114	0				1	100
WT ire1	21	114	0				1	100
WT ire1	24	114	0				1	100
WT ire1	26	114	0				1	100
WT ire1	28	114	0				1	100
WT ire1	31	114	0				1	100
WT ire1	33	114	0				1	100
WT ire1	35	114	0				1	100
WT ire1	38	114	0				1	100
WT ire1	40	114	0				1	100
WT ire1	42	114	0				1	100
WT ire1	45	114	0				1	100
4OE ire1	0	126	0				1	100
4OE ire1	5	126	0				1	100
4OE ire1	7	126	0				1	100
4OE ire1	10	126	0				1	100
4OE ire1	12	126	0				1	100
4OE ire1	14	126	0				1	100
4OE ire1	17	126	0				1	100
4OE ire1	19	126	0				1	100
4OE ire1	21	126	0				1	100
4OE ire1	24	126	0				1	100
4OE ire1	26	126	0				1	100
4OE ire1	28	126	0				1	100
4OE ire1	31	126	0				1	100
4OE ire1	33	126	0				1	100
4OE ire1	35	126	0				1	100
4OE ire1	38	126	0				1	100
4OE ire1	40	126	0				1	100
4OE ire1	42	126	0				1	100
4OE ire1	45
4KO ire-1	0	75	0				1	100
4KO ire-1	5	75	0				1	100
4KO ire-1	7	75	0				1	100
4KO ire-1	10	75	0				1	100
4KO ire-1	12	75	0				1	100
4KO ire-1	14	75	0				1	100
4KO ire-1	17	75	0				1	100
4KO ire-1	19	75	0				1	100
4KO ire-1	21	75	0				1	100
4KO ire-1	24	75	0				1	100
4KO ire-1	26	75	0				1	100
4KO ire-1	28	75	0				1	100
4KO ire-1	31	75	0				1	100
4KO ire-1	33	75	0				1	100
4KO ire-1	35	75	0				1	100
4KO ire-1	38	75	0				1	100
4KO ire-1	40	75	0				1	100
4KO ire-1	42	75	0				1	100
4KO ire-1	45	75	0				1	100
4KO ire-1	47	75	0				1	100
WT pek1	0	121	0				1	100
WT pek1	5	121	0				1	100
WT pek1	7	121	0				1	100
WT pek1	10	121	0				1	100
WT pek1	12	121	0				1	100
WT pek1	14	121	0				1	100
WT pek1	17	121	0				1	100
WT pek1	19	121	0				1	100
WT pek1	21	121	0				1	100
WT pek1	24	121	0				1	100
WT pek1	26	121	0				1	100
WT pek1	28	121	0				1	100
WT pek1	31	121	0				1	100
WT pek1	33	121	0				1	100
WT pek1	35	121	0				1	100
WT pek1	38	121	0				0.960317	96.0317
WT pek1	40	121	0				0.960317	96.0317
WT pek1	42	121	0				0.960317	96.0317
	45
4OE pek1	0	109	0				1	100
4OE pek1	5	109	0				1	100
4OE pek1	7	109	0				1	100
4OE pek1	10	109	0				1	100
4OE pek1	12	109	0				1	100
4OE pek1	14	109	0				1	100
4OE pek1	17	109	0				1	100
4OE pek1	19	109	0				1	100
4OE pek1	21	109	0				1	100
4OE pek1	24	109	0				1	100
4OE pek1	26	109	0				1	100
4OE pek1	28	109	0				1	100
4OE pek1	31	109	0				1	100
4OE pek1	33	109	0				1	100
4OE pek1	35	109	0				1	100
4OE pek1	38	109	0				1	100
4OE pek1	40	109	0				1	100
4OE pek1	42	109	0				1	100
4OE pek1	45
4KO pek1	0	54	0				1	100
4KO pek1	5	54	0				1	100
4KO pek1	7	54	0				1	100
4KO pek1	10	54	0				1	100
4KO pek1	12	54	0				1	100
4KO pek1	14	54	0				1	100
4KO pek1	17	54	0				1	100
4KO pek1	19	54	0				1	100
4KO pek1	21	54	0				1	100
4KO pek1	24	54	0				1	100
4KO pek1	26	54	0				1	100
4KO pek1	28	54	0				1	100
4KO pek1	31	54	0				1	100
4KO pek1	33	54	0				1	100
4KO pek1	35	54	0				1	100
4KO pek1	38	54	0				1	100
4KO pek1	40	54	0				1	100
4KO pek1	42	54	0				1	100
4KO pek1	45
WT xbp1	0	105	0				1	100
WT xbp1	5	105	0				1	100
WT xbp1	7	105	0				1	100
WT xbp1	10	105	0				1	100
WT xbp1	12	105	0				1	100
WT xbp1	14	105	0				1	100
WT xbp1	17	105	0				1	100
WT xbp1	19	105	0				1	100
WT xbp1	21	105	0				1	100
WT xbp1	24	105	0				1	100
WT xbp1	26	105	0				1	100
WT xbp1	28	105	0				1	100
WT xbp1	31	105	0				1	100
WT xbp1	33	105	0				1	100
WT xbp1	35	105	0				1	100
WT xbp1	38	105	0				1	100
WT xbp1	40	105	0				1	100
WT xbp1	42	105	0				1	100
WT xbp1	45	105	0				1	100
4OE xbp1	0	117	0				1	100
4OE xbp1	5	117	0				1	100
4OE xbp1	7	117	0				1	100
4OE xbp1	10	117	0				1	100
4OE xbp1	12	117	0				1	100
4OE xbp1	14	117	0				1	100
4OE xbp1	17	117	0				1	100
4OE xbp1	19	117	0				1	100
4OE xbp1	21	117	0				1	100
4OE xbp1	24	117	0				1	100
4OE xbp1	26	117	0				1	100
4OE xbp1	28	117	0				1	100
4OE xbp1	31	117	0				1	100
4OE xbp1	33	117	0				1	100
4OE xbp1	35	117	0				1	100
4OE xbp1	38	117	0				1	100
4OE xbp1	40	117	0				1	100
4OE xbp1	42	117	0				1	100
4OE xbp1	45
4KO xbp1	0	94	0				1	100
4KO xbp1	5	94	0				1	100
4KO xbp1	7	94	0				1	100
4KO xbp1	10	94	0				1	100
4KO xbp1	12	94	0				1	100
4KO xbp1	14	94	0				1	100
4KO xbp1	17	94	0				1	100
4KO xbp1	19	94	0				1	100
4KO xbp1	21	94	0				1	100
4KO xbp1	24	94	0				1	100
4KO xbp1	26	94	0				1	100
4KO xbp1	28	94	0				1	100
4KO xbp1	31	94	0				1	100
4KO xbp1	33	94	0				1	100
4KO xbp1	35	94	0				1	100
4KO xbp1	38	94	0				1	100
4KO xbp1	40	94	0				1	100
4KO xbp1	42	94	0				1	100
4KO xbp1	45
WT 50-50	0	123	0			0	1	100
WT 50-50	5	123	0			0	1	100
WT 50-50	7	123	0			0	1	100
WT 50-50	10	123	0			0	1	100
WT 50-50	12	123	0			0	1	100
WT 50-50	14	123	0			0	1	100
WT 50-50	17	123	0			0	1	100
WT 50-50	19	123	0			0	1	100
WT 50-50	21	123	0			0	1	100
WT 50-50	24	123	0			0	1	100
WT 50-50	26	123	0			0	1	100
WT 50-50	28	123	0			0	1	100
WT 50-50	31	123	0			0	1	100
WT 50-50	33	123	0			0	1	100
WT 50-50	35	123	0			0	1	100
WT 50-50	38	123	0			0	1	100
WT 50-50	40	123	0			0	1	100
WT 50-50	42	123	0			0	1	100
WT 50-50	45	123	0			0	1	100
4OE 50-50	0	117	0			0	1	100
4OE 50-50	5	117	0			0	1	100
4OE 50-50	7	117	0			0	1	100
4OE 50-50	10	117	0			0	1	100
4OE 50-50	12	117	0			0	1	100
4OE 50-50	14	117	0			0	1	100
4OE 50-50	17	117	0			0	1	100
4OE 50-50	19	117	0			0	1	100
4OE 50-50	21	117	0			0	1	100
4OE 50-50	24	117	0			0	1	100
4OE 50-50	26	117	0			0	1	100
4OE 50-50	28	117	0			0	1	100
4OE 50-50	31	117	0			0	1	100
4OE 50-50	33	117	0			0	1	100
4OE 50-50	35	117	0			0	1	100
4OE 50-50	38	117	0			0	1	100
4OE 50-50	40	117	0			0	1	100
4OE 50-50	42	117	0			0	1	100
4OE 50-50	45	117	0			0	1	100
		117
4KO 5050	0	114	0				1	100
4KO 5050	5	114	0				1	100
4KO 5050	7	114	0				1	100
4KO 5050	10	114	0				1	100
4KO 5050	12	114	0				1	100
4KO 5050	14	114	0				1	100
4KO 5050	17	114	0				1	100
4KO 5050	19	114	0				1	100
4KO 5050	21	114	0				1	100
4KO 5050	24	114	0				1	100
4KO 5050	26	114	0				1	100
4KO 5050	28	114	0				1	100
4KO 5050	31	114	0				1	100
4KO 5050	33	114	0				1	100
4KO 5050	35	114	0				1	100
4KO 5050	38	114	0				1	100
4KO 5050	40	114	0				1	100
4KO 5050	42	114	0				1	100
4KO 5050	45	114	0				1	100
							0

## Sheet: stats
% WT [100]
#days	dead	censored
0
5
7
10	0
12	7
14	9
17	19
19	11
21	17
24	19
26	12
28	6
31
33
35
38
40
42
45
% fmo-4 OE hyp sp [92]
#days	dead	censored
0
5
7
10	0
12	2
14	6
17	12
19	15
21	11
24	21
26	14
28	3
31	5
33	3
35
38
40
42
45
% fmo-4 KO [84]
#days	dead	censored
0
5
7
10	0
12	8
14	10
17	22
19	18
21	16
24	10
26
28
31
33
35
38
40
42
45

## Sheet: analysis
% WT EV [119]					condition	chi	pvalue	corrected_pvalue
#days	dead	censored			WT v.s. fmo-4 OE hyp sp	6.57	0.0104	0.0208
0					WT v.s. fmo-4 KO	18.27	1.9e-05	3.8e-05
5					fmo-4 OE hyp sp v.s. WT	6.57	0.0104	0.0208
7					fmo-4 OE hyp sp v.s. fmo-4 KO	38.36	0	0
9	0				fmo-4 KO v.s. WT	18.27	1.9e-05	3.8e-05
13	1				fmo-4 KO v.s. fmo-4 OE hyp sp	38.36	0	0
15	4
17	7
20	13
22	12
24	31
27	34
29	9
31	8
34
36
38
41
43
45
% WT atf6 [105]
#days	dead	censored
0
5
7
9	0
13	0
15	0
17	3
20	7
22	8
24	18
27	17
29	21
31	13
34	15
36	2
38	1
41
43
45
% C9 atf6 [114]
#days	dead	censored
0
5
7
9	0
13	2
15	1
17	4
20	6
22	7
24	14
27	15
29	27
31	15
34	16
36	2
38	5
41
43
45
% fmo2 atf6 [68]
#days	dead	censored
0
5
7
9	0
13	3
15	2
17	3
20	5
22	9
24	16
27	15
29	12
31	2
34	1
36
38
41
43
45
% 4OE atf6 [69]
#days	dead	censored
0
5
7
9	0
13	3
15	1
17	9
20	4
22	6
24	10
27	14
29	9
31	4
34	8
36	0
38	1
41
43
45
% 4KO atf6 [89]
#days	dead	censored
0
5
7
9	0
13	3
15	3
17	7
20	4
22	8
24	20
27	22
29	18
31	4
34
36
38
41
43
45
% fmo-2 OE EV [112]
#days	dead	censored
0
5
7
9	0
13	1
15	1
17	4
20	6
22	6
24	11
27	19
29	25
31	15
34	14
36	6
38	2
41	0
43	2
45
% fmo-4 OE EV [117]
#days	dead	censored
0
5
7
9	0
13	2
15	2
17	4
20	5
22	6
24	13
27	14
29	26
31	19
34	17
36	4
38	5
41
43
45
% fmo-4 KO EV [100]
#days	dead	censored
0
5
7
9	0
13	4
15	7
17	5
20	13
22	10
24	27
27	21
29	11
31	2
34
36
38
41
43
45
% fmo-2 KO EV [86]
#days	dead	censored
0
5
7
9	0
13	3
15	5
17	9
20	8
22	10
24	14
27	15
29	19
31	3
34
36
38
41
43
45

## Sheet: stats atf-4
% WT EV [119]								condition	chi	pvalue	corrected_pvalue
#days	dead	censored						WT EV v.s. WT atf4	12.96	0.0003	0.0029	****
0								WT EV v.s. C9 atf4	42.64	0	0	****
5								WT EV v.s. fmo2 atf4	0.68	0.4106	1	NS
7								WT EV v.s. 4OE atf4	39.94	0	0	****
9	0							WT EV v.s. 4KO atf4	0.12	0.7286	1	NS
13	1							WT EV v.s. fmo-2 OE EV	49.67	0	0	****
15	4							WT EV v.s. fmo-4 OE EV	53.7	0	0	****
17	7							WT EV v.s. fmo-4 KO EV	2.67	0.1022	0.9196
20	13							WT EV v.s. fmo-2 KO EV	0.01	0.9183	1
22	12							WT atf4 v.s. WT EV	12.96	0.0003	0.0029
24	31							WT atf4 v.s. C9 atf4	19.14	1.2e-05	0.0001
27	34							WT atf4 v.s. fmo2 atf4	17.05	3.6e-05	0.0003
29	9							WT atf4 v.s. 4OE atf4	10.92	0.001	0.0086
31	8							WT atf4 v.s. 4KO atf4	9.11	0.0025	0.0228
34								WT atf4 v.s. fmo-2 OE EV	22.68	1.9e-06	1.7e-05
36								WT atf4 v.s. fmo-4 OE EV	27.03	2e-07	1.8e-06
38								WT atf4 v.s. fmo-4 KO EV	25.49	4.4e-07	4e-06
41								WT atf4 v.s. fmo-2 KO EV	10.21	0.0014	0.0126
43								C9 atf4 v.s. WT EV	42.64	0	0
45								C9 atf4 v.s. WT atf4	19.14	1.2e-05	0.0001
								C9 atf4 v.s. fmo2 atf4	40.62	0	0
% WT atf4 [115]								C9 atf4 v.s. 4OE atf4	3.01	0.0826	0.7435
#days	dead	censored						C9 atf4 v.s. 4KO atf4	34.45	4.4e-09	3.9e-08
0								C9 atf4 v.s. fmo-2 OE EV	0.39	0.5315	1
5								C9 atf4 v.s. fmo-4 OE EV	0.64	0.4252	1
7								C9 atf4 v.s. fmo-4 KO EV	53.23	0	0
9	0							C9 atf4 v.s. fmo-2 KO EV	36.3	0	0
13	1							fmo2 atf4 v.s. WT EV	0.68	0.4106	1
15	4							fmo2 atf4 v.s. WT atf4	17.05	3.6e-05	0.0003
17	1							fmo2 atf4 v.s. C9 atf4	40.62	0	0
20	5							fmo2 atf4 v.s. 4OE atf4	40.58	0	0
22	8							fmo2 atf4 v.s. 4KO atf4	0.14	0.7086	1
24	26							fmo2 atf4 v.s. fmo-2 OE EV	46.4	0	0
27	24							fmo2 atf4 v.s. fmo-4 OE EV	49.75	0	0
29	36							fmo2 atf4 v.s. fmo-4 KO EV	0.53	0.4661	1
31	10							fmo2 atf4 v.s. fmo-2 KO EV	0.42	0.5179	1
34								4OE atf4 v.s. WT EV	39.94	0	0
36								4OE atf4 v.s. WT atf4	10.92	0.001	0.0086
38								4OE atf4 v.s. C9 atf4	3.01	0.0826	0.7435
41								4OE atf4 v.s. fmo2 atf4	40.58	0	0
43								4OE atf4 v.s. 4KO atf4	29.87	4.6e-08	4.2e-07
45								4OE atf4 v.s. fmo-2 OE EV	4.87	0.0274	0.2463
								4OE atf4 v.s. fmo-4 OE EV	6.53	0.0106	0.0952
								4OE atf4 v.s. fmo-4 KO EV	53.4	0	0
% C9 atf4 [109]								4OE atf4 v.s. fmo-2 KO EV	31	2.6e-08	2.3e-07
#days	dead	censored						4KO atf4 v.s. WT EV	0.12	0.7286	1
0								4KO atf4 v.s. WT atf4	9.11	0.0025	0.0228
5								4KO atf4 v.s. C9 atf4	34.45	4.4e-09	3.9e-08
7								4KO atf4 v.s. fmo2 atf4	0.14	0.7086	1
9	0							4KO atf4 v.s. 4OE atf4	29.87	4.6e-08	4.2e-07
13	0							4KO atf4 v.s. fmo-2 OE EV	39.7	0	0
15	3							4KO atf4 v.s. fmo-4 OE EV	43.09	0	0
17	5							4KO atf4 v.s. fmo-4 KO EV	1.11	0.2925	1
20	5							4KO atf4 v.s. fmo-2 KO EV	0.01	0.9399	1
22	7							fmo-2 OE EV v.s. WT EV	49.67	0	0
24	14							fmo-2 OE EV v.s. WT atf4	22.68	1.9e-06	1.7e-05
27	12							fmo-2 OE EV v.s. C9 atf4	0.39	0.5315	1
29	25							fmo-2 OE EV v.s. fmo2 atf4	46.4	0	0
31	19							fmo-2 OE EV v.s. 4OE atf4	4.87	0.0274	0.2463
34	10							fmo-2 OE EV v.s. 4KO atf4	39.7	0	0
36	7							fmo-2 OE EV v.s. fmo-4 OE EV	0.01	0.9312	1
38	2							fmo-2 OE EV v.s. fmo-4 KO EV	59.81	0	0
41								fmo-2 OE EV v.s. fmo-2 KO EV	40.57	0	0
43								fmo-4 OE EV v.s. WT EV	53.7	0	0
45								fmo-4 OE EV v.s. WT atf4	27.03	2e-07	1.8e-06
								fmo-4 OE EV v.s. C9 atf4	0.64	0.4252	1
								fmo-4 OE EV v.s. fmo2 atf4	49.75	0	0
								fmo-4 OE EV v.s. 4OE atf4	6.53	0.0106	0.0952
% fmo2 atf4 [77]								fmo-4 OE EV v.s. 4KO atf4	43.09	0	0
#days	dead	censored						fmo-4 OE EV v.s. fmo-2 OE EV	0.01	0.9312	1
0								fmo-4 OE EV v.s. fmo-4 KO EV	64.02	0	0
5								fmo-4 OE EV v.s. fmo-2 KO EV	44.86	0	0
7								fmo-4 KO EV v.s. WT EV	2.67	0.1022	0.9196
9	0							fmo-4 KO EV v.s. WT atf4	25.49	4.4e-07	4e-06
13	0							fmo-4 KO EV v.s. C9 atf4	53.23	0	0
15	7							fmo-4 KO EV v.s. fmo2 atf4	0.53	0.4661	1
17	2							fmo-4 KO EV v.s. 4OE atf4	53.4	0	0
20	5							fmo-4 KO EV v.s. 4KO atf4	1.11	0.2925	1
22	10							fmo-4 KO EV v.s. fmo-2 OE EV	59.81	0	0
24	26							fmo-4 KO EV v.s. fmo-4 OE EV	64.02	0	0
27	16							fmo-4 KO EV v.s. fmo-2 KO EV	1.89	0.1691	1
29	9							fmo-2 KO EV v.s. WT EV	0.01	0.9183	1
31	2							fmo-2 KO EV v.s. WT atf4	10.21	0.0014	0.0126
34								fmo-2 KO EV v.s. C9 atf4	36.3	0	0
36								fmo-2 KO EV v.s. fmo2 atf4	0.42	0.5179	1	NS
38								fmo-2 KO EV v.s. 4OE atf4	31	2.6e-08	2.3e-07
41								fmo-2 KO EV v.s. 4KO atf4	0.01	0.9399	1
43								fmo-2 KO EV v.s. fmo-2 OE EV	40.57	0	0
45								fmo-2 KO EV v.s. fmo-4 OE EV	44.86	0	0
								fmo-2 KO EV v.s. fmo-4 KO EV	1.89	0.1691	1
% 4OE atf4 [121]
#days	dead	censored
0
5
7
9	0
13	0
15	4
17	1
20	4
22	7
24	14
27	29
29	35
31	15
34	9
36	3
38
41
43
45
% 4KO atf4 [82]
#days	dead	censored
0
5
7
9	0
13	7
15	6
17	5
20	12
22	5
24	15
27	14
29	10
31	8
34
36
38
41
43
45
% fmo-2 OE EV [112]
#days	dead	censored
0
5
7
9	0
13	1
15	1
17	4
20	6
22	6
24	11
27	19
29	25
31	15
34	14
36	6
38	2
41	0
43	2
45
% fmo-4 OE EV [117]
#days	dead	censored
0
5
7
9	0
13	2
15	2
17	4
20	5
22	6
24	13
27	14
29	26
31	19
34	17
36	4
38	5
41
43
45
% fmo-4 KO EV [100]
#days	dead	censored
0
5
7
9	0
13	4
15	7
17	5
20	13
22	10
24	27
27	21
29	11
31	2
34
36
38
41
43
45
% fmo-2 KO EV [86]
#days	dead	censored
0
5
7
9	0
13	3
15	5
17	9
20	8
22	10
24	14
27	15
29	19
31	3
34
36
38
41
43
45

## Sheet: Sheet1
#1	N2								#1	N2					#1	N2
#2	Lei42	fmo-2p::MC; unc-119p::HIF-1(P621A); JT307 #1							#2	Lei42	fmo-2p::MC; unc-119p::HIF-1(P621A); JT307 #1				#11L	Lei51	fmo-2p::MC; JT307; gcy-31; gcy-36 - XA2262 sibling #1
#3	Lei43	fmo-2p::MC; unc-119p::HIF-1(P621A); JT307 #2							#3	Lei43	fmo-2p::MC; unc-119p::HIF-1(P621A); JT307 #2				#12L	Lei52	fmo-2p::MC; JT307; gcy-33; gcy-36 - XA2262 sibling #1
#4	Lei44	fmo-2p::MC; TU3311; CB5602 #1							#4	Lei44	fmo-2p::MC; TU3311; CB5602 #1				#13	Lei53	fmo-2p::MC; JT307; gcy-33; gcy-36 - XA2262 sibling #2
#5	Lei45	fmo-2p::MC; TU3311 #1							#5	Lei45	fmo-2p::MC; TU3311 #1				#14L	Lei55	fmo-2p::MC; JT307 - XA2262 sibling #1
#6	Lei46	fmo-2p::MC; CB5602 #1							#6	Lei46	fmo-2p::MC; CB5602 #1				#15L	Lei56	fmo-2p::MC; JT307 - XA2262 sibling #2
#7	Lei47	fmo-2p::MC; TU3311; CB5602 #2							#7	Lei47	fmo-2p::MC; TU3311; CB5602 #2				#16	Lei57	fmo-2p::MC - XA2262 sibling #1
#8L	Lei48	fmo-2p::MC; JT307; XA2262 #1													#17	Lei58	fmo-2p::MC - XA2262 sibling #2
#9	Lei49	fmo-2p::MC; JT307; XA2262 #2													#18	Lei59	fmo-2p::MC; gcy-33; gcy-36 - XA2262 sibling #1
#10L	Lei50	fmo-2p::MC; JT307; XA2262 #3							#1	N2					#19	Lei60	fmo-2p::MC; gcy-33; gcy-36 - XA2262 sibling #2
#11L	Lei51	fmo-2p::MC; JT307; gcy-31; gcy-36 - XA2262 sibling #1							#8L	Lei48	fmo-2p::MC; JT307; XA2262 #1
#12L	Lei52	fmo-2p::MC; JT307; gcy-33; gcy-36 - XA2262 sibling #1							#9	Lei49	fmo-2p::MC; JT307; XA2262 #2
#13	Lei53	fmo-2p::MC; JT307; gcy-33; gcy-36 - XA2262 sibling #2							#10L	Lei50	fmo-2p::MC; JT307; XA2262 #3
#14L	Lei55	fmo-2p::MC; JT307 - XA2262 sibling #1							#14L	Lei55	fmo-2p::MC; JT307 - XA2262 sibling #1
#15L	Lei56	fmo-2p::MC; JT307 - XA2262 sibling #2							#15L	Lei56	fmo-2p::MC; JT307 - XA2262 sibling #2
#16	Lei57	fmo-2p::MC - XA2262 sibling #1							#16	Lei57	fmo-2p::MC - XA2262 sibling #1
#17	Lei58	fmo-2p::MC - XA2262 sibling #2							#17	Lei58	fmo-2p::MC - XA2262 sibling #2
#18	Lei59	fmo-2p::MC; gcy-33; gcy-36 - XA2262 sibling #1							#20	Lei61	fmo-2p::MC; XA2262 #1
#19	Lei60	fmo-2p::MC; gcy-33; gcy-36 - XA2262 sibling #2							#21	Lei62	fmo-2p::MC; XA2262 #2
#20	Lei61	fmo-2p::MC; XA2262 #1
#21	Lei62	fmo-2p::MC; XA2262 #2
