# Supplementary material for: fmo-4 promotes longevity and stress resistance via ER to mitochondria calcium regulation in C. elegans
Source: eLife journal article supplement (doi:10.7554/elife.99971), 2024-08-27
Supplement: fig4-data2 [file 06.15.2023 fmo4 hyp sp stress resistance assay.xlsx]

## Sheet: data
strain	day	alive	dead-total	dead-normal	dead-ruptured	censored	ratio-alive	percentage-alive
N2	0	75	0	0		0	1	100
N2	3	67	8	8		0	0.893333	89.3333
N2	4	60	15	7		0	0.8	80						1	2	3	4	5	6	7	8	9	10	11	12							#19	#20	#21
N2	5	58	17	2		0	0.773333	77.3333			plot data here-->		day	WT	FMO-2 OE	FMO-4 OE	FMO-4 OE 6.3	FMO-4 OE 2.6														Lei60	Lei61	Lei62
N2	6	53	22	5		0	0.706667	70.6667				0	0	100	100	100	100	100
N2	9	32	43	21		0	0.426667	42.6667				3	3	89.3333	98.6111	96.3636	98.75	94.2857
N2	11	14	61	18		0	0.186667	18.6667				4	4	80	95.8333	83.6364	91.25	82.8571
N2	13	6	69	8		0	0.08	8				5	5	77.3333	90.2778	69.0909	81.25	74.2857
N2	16	0	75	6		0	0	0				6	6	70.6667	87.5	60	75	68.5714
N2	18	0	75			0	0	0				9	9	42.6667	75	34.5455	61.25	52.8571
N2	20	0	75			0	0	0				11	11	18.6667	66.6667	21.8182	51.25	34.2857
N2	23	0	75			0	0	0				13	13	8	58.3333	16.3636	41.25	21.4286
N2	25	0	75			0	0	0				16	16	0	45.8333	9.09091	21.25	8.57143
N2	27	0	75			0	0	0				18	18		36.1111	3.63636	10	4.28571
N2	30	0	75			0	0	0				20	20		25	3.63636	2.5	0
N2	32	0	75			0	0	0				23	23		11.1111	1.81818	0
N2	34	0	75			0	0	0				25	25		4.16667	0
N2	37	0	75			0	0	0				27	27		0
N2	39	0	75			0	0	0				30	30
C9	0	72	0	0		0	1	100
C9	3	71	1	1		0	0.986111	98.6111
C9	4	69	3	2		0	0.958333	95.8333
C9	5	65	7	4		0	0.902778	90.2778
C9	6	63	9	2		0	0.875	87.5
C9	9	54	18	9		0	0.75	75
C9	11	48	24	6		0	0.666667	66.6667
C9	13	42	30	6		0	0.583333	58.3333
C9	16	33	39	9		0	0.458333	45.8333
C9	18	26	46	7		0	0.361111	36.1111
C9	20	18	54	8		0	0.25	25
C9	23	8	64	10		0	0.111111	11.1111
C9	25	3	69	5		0	0.0416667	4.16667
C9	27	3	69			0	0.0416667	4.16667
C9	30	3	69			0	0.0416667	4.16667
C9	32	3	69			0	0.0416667	4.16667
C9	34	3	69			0	0.0416667	4.16667
C9	37	3	69			0	0.0416667	4.16667
C9	39	3	69			0	0.0416667	4.16667
4OE	0	55	0	0		0	1	100
4OE	3	53	2	2		0	0.963636	96.3636
4OE	4	46	9	7		0	0.836364	83.6364
4OE	5	38	17	8		0	0.690909	69.0909
4OE	6	33	22	5		0	0.6	60
4OE	9	19	36	14		0	0.345455	34.5455
4OE	11	12	43	7		0	0.218182	21.8182
4OE	13	9	46	3		0	0.163636	16.3636
4OE	16	5	50	4		0	0.0909091	9.09091
4OE	18	2	53	3		0	0.0363636	3.63636
4OE	20	2	53	0		0	0.0363636	3.63636
4OE	23	1	54	1		0	0.0181818	1.81818
4OE	25	0	55	1		0	0	0
4OE	27	0	55			0	0	0
4OE	30	0	55			0	0	0
4OE	32	0	55			0	0	0
4OE	34	0	55			0	0	0
4OE	37	0	55			0	0	0
4OE	39	0	55			0	0	0
							0
4OE 6.3 hyp sp	0	80	0	0		0	1	100
4OE 6.3 hyp sp	3	79	1	1		0	0.9875	98.75
4OE 6.3 hyp sp	4	73	7	6		0	0.9125	91.25
4OE 6.3 hyp sp	5	65	15	8		0	0.8125	81.25
4OE 6.3 hyp sp	6	60	20	5		0	0.75	75
4OE 6.3 hyp sp	9	49	31	11			0.6125	61.25
4OE 6.3 hyp sp	11	41	39	8		0	0.5125	51.25
4OE 6.3 hyp sp	13	33	47	8		0	0.4125	41.25
4OE 6.3 hyp sp	16	17	63	16		0	0.2125	21.25
4OE 6.3 hyp sp	18	8	72	9		0	0.1	10
4OE 6.3 hyp sp	20	2	78	6		0	0.025	2.5
4OE 6.3 hyp sp	23	0	80	2		0	0	0
4OE 6.3 hyp sp	25	0	80			0	0	0
4OE 6.3 hyp sp	27	0	80			0	0	0
4OE 6.3 hyp sp	30	0	80			0	0	0
4OE 6.3 hyp sp	32	0	80			0	0	0
4OE 6.3 hyp sp	34	0	80			0	0	0
4OE 6.3 hyp sp	37	0	80			0	0	0
4OE 6.3 hyp sp	39	0	80			0	0	0
4OE 2.6 hyp sp	0	70	0	0		0	1	100
4OE 2.6 hyp sp	3	66	4	4		0	0.942857	94.2857
4OE 2.6 hyp sp	4	58	12	8		0	0.828571	82.8571
4OE 2.6 hyp sp	5	52	18	6		0	0.742857	74.2857
4OE 2.6 hyp sp	6	48	22	4		0	0.685714	68.5714
4OE 2.6 hyp sp	9	37	33	11		0	0.528571	52.8571
4OE 2.6 hyp sp	11	24	46	13		0	0.342857	34.2857
4OE 2.6 hyp sp	13	15	55	9		0	0.214286	21.4286
4OE 2.6 hyp sp	16	6	64	9		0	0.0857143	8.57143
4OE 2.6 hyp sp	18	3	67	3		0	0.0428571	4.28571
4OE 2.6 hyp sp	20	0	70	3		0	0	0
4OE 2.6 hyp sp	23	0	70			0	0	0
4OE 2.6 hyp sp	25	0	70			0	0	0
4OE 2.6 hyp sp	27	0	70			0	0	0
4OE 2.6 hyp sp	30	0	70			0	0	0
4OE 2.6 hyp sp	32	0	70			0	0	0
4OE 2.6 hyp sp	34	0	70			0	0	0
4OE 2.6 hyp sp	37	0	70			0	0	0
4OE 2.6 hyp sp	39	0	70			0	0	0

## Sheet: stats
% WT [75]					condition	chi	pvalue	corrected_pvalue
#days	dead	censored			WT v.s. fmo-2 OE	51.9	0	0
0	0				WT v.s. fmo-4 OE	0.32	0.5736	1
3	8				WT v.s. fmo-4 OE hyp sp 6.3	22.22	2.4e-06	9.7e-06
4	7				WT v.s. fmo-4OE hyp sp 2.6	4.97	0.0258	0.1031
5	2				fmo-2 OE v.s. WT	51.9	0	0
6	5				fmo-2 OE v.s. fmo-4 OE	31.16	2.4e-08	9.5e-08
9	21				fmo-2 OE v.s. fmo-4 OE hyp sp 6.3	17.6	2.7e-05	0.0001
11	18				fmo-2 OE v.s. fmo-4OE hyp sp 2.6	32.77	1e-08	4.2e-08
13	8				fmo-4 OE v.s. WT	0.32	0.5736	1
16	6				fmo-4 OE v.s. fmo-2 OE	31.16	2.4e-08	9.5e-08
18					fmo-4 OE v.s. fmo-4 OE hyp sp 6.3	7.47	0.0063	0.0251
20					fmo-4 OE v.s. fmo-4OE hyp sp 2.6	0.72	0.3959	1
23					fmo-4 OE hyp sp 6.3 v.s. WT	22.22	2.4e-06	9.7e-06
25					fmo-4 OE hyp sp 6.3 v.s. fmo-2 OE	17.6	2.7e-05	0.0001
27					fmo-4 OE hyp sp 6.3 v.s. fmo-4 OE	7.47	0.0063	0.0251
30					fmo-4 OE hyp sp 6.3 v.s. fmo-4OE hyp sp 2.6	6.37	0.0116	0.0465
					fmo-4OE hyp sp 2.6 v.s. WT	4.97	0.0258	0.1031
					fmo-4OE hyp sp 2.6 v.s. fmo-2 OE	32.77	1e-08	4.2e-08
					fmo-4OE hyp sp 2.6 v.s. fmo-4 OE	0.72	0.3959	1
					fmo-4OE hyp sp 2.6 v.s. fmo-4 OE hyp sp 6.3	6.37	0.0116	0.0465
% fmo-2 OE [72]
#days	dead	censored
0	0
3	1
4	2
5	4
6	2
9	9
11	6
13	6
16	9
18	7
20	8
23	10
25	5
27
30
% fmo-4 OE [55]
#days	dead	censored
0	0
3	2
4	7
5	8
6	5
9	14
11	7
13	3
16	4
18	3
20	0
23	1
25	1
27
30
% fmo-4 OE hyp sp 6.3 [80]
#days	dead	censored
0	0
3	1
4	6
5	8
6	5
9	11
11	8
13	8
16	16
18	9
20	6
23	2
25
27
30
% fmo-4OE hyp sp 2.6 [70]
#days	dead	censored
0	0
3	4
4	8
5	6
6	4
9	11
11	13
13	9
16	9
18	3
20	3
23
25
27
30

## Sheet: Sheet2
condition	chi	pvalue	corrected_pvalue
WT v.s. fmo-2 OE	27.63	1.5e-07	5.9e-07	****
WT v.s. fmo-4 OE	11.56	0.0007	0.0027	****
WT v.s. fmo-4 KO	0.43	0.511	1	ns
WT v.s. fmo-2O;4KO	2.16	0.142	0.5682	ns
fmo-2 OE v.s. WT	27.63	1.5e-07	5.9e-07
fmo-2 OE v.s. fmo-4 OE	8.78	0.003	0.0122
fmo-2 OE v.s. fmo-4 KO	46.84	0	0
fmo-2 OE v.s. fmo-2O;4KO	34.78	3.7e-09	1.5e-08
fmo-4 OE v.s. WT	11.56	0.0007	0.0027
fmo-4 OE v.s. fmo-2 OE	8.78	0.003	0.0122
fmo-4 OE v.s. fmo-4 KO	25.04	5.6e-07	2.2e-06
fmo-4 OE v.s. fmo-2O;4KO	9.93	0.0016	0.0065
fmo-4 KO v.s. WT	0.43	0.511	1
fmo-4 KO v.s. fmo-2 OE	46.84	0	0
fmo-4 KO v.s. fmo-4 OE	25.04	5.6e-07	2.2e-06
fmo-4 KO v.s. fmo-2O;4KO	8.62	0.0033	0.0133
fmo-2O;4KO v.s. WT	2.16	0.142	0.5682
fmo-2O;4KO v.s. fmo-2 OE	34.78	3.7e-09	1.5e-08
fmo-2O;4KO v.s. fmo-4 OE	9.93	0.0016	0.0065
fmo-2O;4KO v.s. fmo-4 KO	8.62	0.0033	0.0133

## Sheet: Sheet1
#1	N2								#1	N2					#1	N2
#2	Lei42	fmo-2p::MC; unc-119p::HIF-1(P621A); JT307 #1							#2	Lei42	fmo-2p::MC; unc-119p::HIF-1(P621A); JT307 #1				#11L	Lei51	fmo-2p::MC; JT307; gcy-31; gcy-36 - XA2262 sibling #1
#3	Lei43	fmo-2p::MC; unc-119p::HIF-1(P621A); JT307 #2							#3	Lei43	fmo-2p::MC; unc-119p::HIF-1(P621A); JT307 #2				#12L	Lei52	fmo-2p::MC; JT307; gcy-33; gcy-36 - XA2262 sibling #1
#4	Lei44	fmo-2p::MC; TU3311; CB5602 #1							#4	Lei44	fmo-2p::MC; TU3311; CB5602 #1				#13	Lei53	fmo-2p::MC; JT307; gcy-33; gcy-36 - XA2262 sibling #2
#5	Lei45	fmo-2p::MC; TU3311 #1							#5	Lei45	fmo-2p::MC; TU3311 #1				#14L	Lei55	fmo-2p::MC; JT307 - XA2262 sibling #1
#6	Lei46	fmo-2p::MC; CB5602 #1							#6	Lei46	fmo-2p::MC; CB5602 #1				#15L	Lei56	fmo-2p::MC; JT307 - XA2262 sibling #2
#7	Lei47	fmo-2p::MC; TU3311; CB5602 #2							#7	Lei47	fmo-2p::MC; TU3311; CB5602 #2				#16	Lei57	fmo-2p::MC - XA2262 sibling #1
#8L	Lei48	fmo-2p::MC; JT307; XA2262 #1													#17	Lei58	fmo-2p::MC - XA2262 sibling #2
#9	Lei49	fmo-2p::MC; JT307; XA2262 #2													#18	Lei59	fmo-2p::MC; gcy-33; gcy-36 - XA2262 sibling #1
#10L	Lei50	fmo-2p::MC; JT307; XA2262 #3							#1	N2					#19	Lei60	fmo-2p::MC; gcy-33; gcy-36 - XA2262 sibling #2
#11L	Lei51	fmo-2p::MC; JT307; gcy-31; gcy-36 - XA2262 sibling #1							#8L	Lei48	fmo-2p::MC; JT307; XA2262 #1
#12L	Lei52	fmo-2p::MC; JT307; gcy-33; gcy-36 - XA2262 sibling #1							#9	Lei49	fmo-2p::MC; JT307; XA2262 #2
#13	Lei53	fmo-2p::MC; JT307; gcy-33; gcy-36 - XA2262 sibling #2							#10L	Lei50	fmo-2p::MC; JT307; XA2262 #3
#14L	Lei55	fmo-2p::MC; JT307 - XA2262 sibling #1							#14L	Lei55	fmo-2p::MC; JT307 - XA2262 sibling #1
#15L	Lei56	fmo-2p::MC; JT307 - XA2262 sibling #2							#15L	Lei56	fmo-2p::MC; JT307 - XA2262 sibling #2
#16	Lei57	fmo-2p::MC - XA2262 sibling #1							#16	Lei57	fmo-2p::MC - XA2262 sibling #1
#17	Lei58	fmo-2p::MC - XA2262 sibling #2							#17	Lei58	fmo-2p::MC - XA2262 sibling #2
#18	Lei59	fmo-2p::MC; gcy-33; gcy-36 - XA2262 sibling #1							#20	Lei61	fmo-2p::MC; XA2262 #1
#19	Lei60	fmo-2p::MC; gcy-33; gcy-36 - XA2262 sibling #2							#21	Lei62	fmo-2p::MC; XA2262 #2
#20	Lei61	fmo-2p::MC; XA2262 #1
#21	Lei62	fmo-2p::MC; XA2262 #2
