# Supplementary material for: fmo-4 promotes longevity and stress resistance via ER to mitochondria calcium regulation in C. elegans
Source: eLife journal article supplement (doi:10.7554/elife.99971), 2024-08-27
Supplement: fig4-data2 [file elife-99971-fig4-data2-v1.zip]

## Sheet: data
strain	day	alive	dead-total	dead-normal	dead-ruptured	censored	ratio-alive	percentage-alive
N2	0	73	0	0		0	1	100
N2	3	71	2	2		0	0.972603	97.2603
N2	4	26	47	45		0	0.356164	35.6164						1	2	3	4	5	6	7	8	9	10	11	12							#19	#20	#21
N2	5	6	67	20		0	0.0821918	8.21918			plot data here-->		day	WT	FMO-2 OE	FMO-4 OE	FMO-4 OE Hyp 6.3	FMO-4 OE Hyp 2.6	FMO-4 KO													Lei60	Lei61	Lei62
N2	6	0	73	6		0	0	0				0	0	100	100	100	100	100	100
N2	9	0	73			0	0	0				3	3	97.2603	100	100	100	100	96.3415
N2	11	0	73			0	0	0				4	4	35.6164	96.0526	91.358	82.8571	77.0492	47.561
N2	13	0	73			0	0	0				5	5	8.21918	88.1579	82.716	68.5714	59.0164	25.6098
N2	16	0	73			0	0	0				6	6	0	73.6842	62.963	35.7143	24.5902	3.65854
N2	18	0	73			0	0	0				9	9		60.5263	51.8519	24.2857	14.7541	0
N2	20	0	73			0	0	0				11	11		48.6842	38.2716	8.57143	4.91803
N2	23	0	73			0	0	0				13	13		43.4211	23.4568	4.28571	1.63934
N2	25	0	73			0	0	0				16	16		35.5263	12.3457	0	0
N2	27	0	73			0	0	0				18	18		19.7368	3.7037
N2	30	0	73			0	0	0				20	20		9.21053	1.23457
N2	32	0	73			0	0	0				23	23		0	0
N2	34	0	73			0	0	0				25	25
N2	37	0	73			0	0	0				27	27
N2	39	0	73			0	0	0				30	30
C9	0	76	0	0		0	1	100
C9	3	76	0	0		0	1	100
C9	4	73	3	3		0	0.960526	96.0526
C9	5	67	9	6		0	0.881579	88.1579
C9	6	56	20	11		0	0.736842	73.6842
C9	9	46	30	10		0	0.605263	60.5263
C9	11	37	39	9		0	0.486842	48.6842
C9	13	33	43	4		0	0.434211	43.4211
C9	16	27	49	6		0	0.355263	35.5263
C9	18	15	61	12		0	0.197368	19.7368
C9	20	7	69	8		0	0.0921053	9.21053
C9	23	0	76	7		0	0	0
C9	25	0	76			0	0	0
C9	27	0	76			0	0	0
C9	30	0	76			0	0	0
C9	32	0	76			0	0	0
C9	34	0	76			0	0	0
C9	37	0	76			0	0	0
C9	39	0	76			0	0	0
4OE	0	81	0	0		0	1	100
4OE	3	81	0	0		0	1	100
4OE	4	74	7	7		0	0.91358	91.358
4OE	5	67	14	7		0	0.82716	82.716
4OE	6	51	30	16		0	0.62963	62.963
4OE	9	42	39	9		0	0.518519	51.8519
4OE	11	31	50	11		0	0.382716	38.2716
4OE	13	19	62	12		0	0.234568	23.4568
4OE	16	10	71	9		0	0.123457	12.3457
4OE	18	3	78	7		0	0.037037	3.7037
4OE	20	1	80	2		0	0.0123457	1.23457
4OE	23	0	81	1		0	0	0
4OE	25	0	81			0	0	0
4OE	27	0	81			0	0	0
4OE	30	0	81			0	0	0
4OE	32	0	81			0	0	0
4OE	34	0	81			0	0	0
4OE	37	0	81			0	0	0
4OE	39	0	81			0	0	0
							0
4OE 6.3 hyp sp	0	70	0	0		0	1	100
4OE 6.3 hyp sp	3	70	0	0		0	1	100
4OE 6.3 hyp sp	4	58	12	12		0	0.828571	82.8571
4OE 6.3 hyp sp	5	48	22	10		0	0.685714	68.5714
4OE 6.3 hyp sp	6	25	45	23		0	0.357143	35.7143
4OE 6.3 hyp sp	9	17	53	8			0.242857	24.2857
4OE 6.3 hyp sp	11	6	64	11		0	0.0857143	8.57143
4OE 6.3 hyp sp	13	3	67	3		0	0.0428571	4.28571
4OE 6.3 hyp sp	16	0	70	3		0	0	0
4OE 6.3 hyp sp	18	0	70			0	0	0
4OE 6.3 hyp sp	20	0	70			0	0	0
4OE 6.3 hyp sp	23	0	70			0	0	0
4OE 6.3 hyp sp	25	0	70			0	0	0
4OE 6.3 hyp sp	27	0	70			0	0	0
4OE 6.3 hyp sp	30	0	70			0	0	0
4OE 6.3 hyp sp	32	0	70			0	0	0
4OE 6.3 hyp sp	34	0	70			0	0	0
4OE 6.3 hyp sp	37	0	70			0	0	0
4OE 6.3 hyp sp	39	0	70			0	0	0
4OE 2.6 hyp sp	0	61	0	0		0	1	100
4OE 2.6 hyp sp	3	61	0	0		0	1	100
4OE 2.6 hyp sp	4	47	14	14		0	0.770492	77.0492
4OE 2.6 hyp sp	5	36	25	11		0	0.590164	59.0164
4OE 2.6 hyp sp	6	15	46	21		0	0.245902	24.5902
4OE 2.6 hyp sp	9	9	52	6		0	0.147541	14.7541
4OE 2.6 hyp sp	11	3	58	6		0	0.0491803	4.91803
4OE 2.6 hyp sp	13	1	60	2		0	0.0163934	1.63934
4OE 2.6 hyp sp	16	0	61	1		0	0	0
4OE 2.6 hyp sp	18	0	61			0	0	0
4OE 2.6 hyp sp	20	0	61			0	0	0
4OE 2.6 hyp sp	23	0	61			0	0	0
4OE 2.6 hyp sp	25	0	61			0	0	0
4OE 2.6 hyp sp	27	0	61			0	0	0
4OE 2.6 hyp sp	30	0	61			0	0	0
4OE 2.6 hyp sp	32	0	61			0	0	0
4OE 2.6 hyp sp	34	0	61			0	0	0
4OE 2.6 hyp sp	37	0	61			0	0	0
4OE 2.6 hyp sp	39	0	61			0	0	0
4KO	0	82	0	0		0	1	100
4KO	3	79	3	3		0	0.963415	96.3415
4KO	4	39	43	40		0	0.47561	47.561
4KO	5	21	61	18		0	0.256098	25.6098
4KO	6	3	79	18		0	0.0365854	3.65854
4KO	7	0	82	3		0	0	0
4KO	8	0	82			0	0	0
4KO	9	0	82			0	0	0
4KO	10	0	82			0	0	0
4KO	11	0	82			0	0	0
4KO	12	0	82			0	0	0
4KO	13	0	82			0	0	0
4KO	14	0	82			0	0	0
4KO	15	0	82			0	0	0
4KO		0	82			0	0	0
4KO	17	0	82			0	0	0
4KO	18	0	82			0	0	0
4KO	19	0	82			0	0	0
4KO	20	0	82			0	0	0
7	0	86	0			0	1	100
7	5	86	0			0	1	100
7	7	86	0			0	1	100
7	10	86	0			0	1	100
7	13	86	0			0	1	100
7	16	86	0			0	1	100
7	17	86	0			0	1	100
7	20	86	0			0	1	100
7	22	86	0			0	1	100
7	24	86	0			0	1	100
7	27	86	0			0	1	100
7	29	86	0			0	1	100
7	31	86	0			0	1	100
7	34	86	0			0	1	100
7	36	86	0			0	1	100
7	38	86	0			0	1	100
7	41	86	0			0	1	100
7	44	86	0			0	1	100
7	46	86	0			0	1	100
8	0	103	0			0	1	100
8	5	103	0			0	1	100
8	7	103	0			0	1	100
8	10	103	0			0	1	100
8	13	103	0			0	1	100
8	16	103	0			0	1	100
8	17	103	0			0	1	100
8	20	103	0			0	1	100
8	22	103	0			0	1	100
8	24	103	0			0	1	100
8	27	103	0			0	1	100
8	29	103	0			0	1	100
8	31	103	0			0	1	100
8	34	103	0			0	1	100
8	36	103	0			0	1	100
8	38	103	0			0	1	100
8	41	103	0			0	1	100
8	44	103	0			0	1	100
	46
9	0	96	0			0	1	100
9	5	96	0			0	1	100
9	7	96	0			0	1	100
9	10	96	0			0	1	100
9	13	96	0			0	1	100
9	16	96	0			0	1	100
9	17	96	0			0	1	100
9	20	96	0			0	1	100
9	22	96	0			0	1	100
9	24	96	0			0	1	100
9	27	96	0			0	1	100
9	29	96	0			0	1	100
9	31	96	0			0	1	100
9	34	96	0			0	1	100
9	36	96	0			0	1	100
9	38	96	0			0	1	100
9	41	96	0			0	1	100
9	44	96	0			0	1	100
9	46	96	0				1	100
9	47	96	0				1	100
10L	0	78	0			0	1	100
10	5	78	0			0	1	100
10	7	78	0			0	1	100
10	10	78	0			0	1	100
10	13	78	0			0	1	100
10	16	78	0			0	1	100
10	17	78	0			0	1	100
10	20	78	0			0	1	100
10	22	78	0			0	1	100
10	24	78	0			0	1	100
10	27	78	0			0	1	100
10	29	78	0			0	1	100
10	31	78	0			0	1	100
10	34	78	0			0	1	100
10	36	78	0		0	0	1	100
10	38	78	0		0	0	0.757282	75.7282
10	41	78	0		0	0	0.757282	75.7282
10	44	78	0		0	0	0.757282	75.7282
	46	78	0		0	0	0.757282	75.7282
	48	78	0		0	0	0.757282	75.7282
11L	0	104	0		0	0	1	100
11	5	104	0		0	0	1	100
11	7	104	0		0	0	1	100
11	11	104	0		0	0	1	100
11	13	103	1		1	0	0.990385	99.0385
11	16	103	1			0	0.990385	99.0385
11	18	102	2		1	0	0.980769	98.0769
11	20	101	3		1	0	0.971154	97.1154
11	23	101	3		0	0	0.971154	97.1154
11	25	101	3			0	0.971154	97.1154
11	27	101	3			0	0.971154	97.1154
11	30	101	3			0	0.971154	97.1154
11	32	101	3			0	0.971154	97.1154
11	34	101	3			0	0.971154	97.1154
11	37	101	3		0	0	0.971154	97.1154
11	39	101	3		0	0	0.971154	97.1154
11	41	101	3		0	0	0.971154	97.1154
11	44	101	3		0	0	0.971154	97.1154
	46
12L	0	62	0		0	0	1	100
12	5	62	0		0	0	1	100
12	7	62	0		0	0	1	100
12	11	62	0		0	0	1	100
12	13	62	0		0	0	1	100
12	16	62	0			0	1	100
12	18	62	0			0	1	100
12	20	62	0			0	1	100
12	23	62	0			0	1	100
12	25	62	0			0	1	100
12	27	62	0			0	1	100
12	30	62	0			0	1	100
12	32	62	0			0	1	100
12	34	62	0			0	1	100
12	37	62	0			0	1	100
12	39	62	0			0	1	100
12	41	62	0		0	0	1	100
12	44	62	0		0	0	1	100
	46
13	0	48	0		0	0	1	100
13	5	48	0		0	0	1	100
13	7	48	0		0	0	1	100
13	11	48	0		0	0	1	100
13	14	48	0		0	0	1	100
13	16	47	1		1	0	0.979167	97.9167
13	18	45	3		2	0	0.9375	93.75
13	21	43	5		2	0	0.895833	89.5833
13	23	43	5		0	0	0.895833	89.5833
13	25	43	5			0	0.895833	89.5833
13	28	43	5			0	0.895833	89.5833
13	30	43	5			0	0.895833	89.5833
13	32	43	5			0	0.895833	89.5833
13	35	43	5			0	0.895833	89.5833
13	37	43	5			0	0.895833	89.5833
13	39	43	5			0	0.895833	89.5833
13	42	43	5			0	0.895833	89.5833
13	44	43	5			0	0.895833	89.5833
13	45	43	5				0.895833	89.5833
14L	0	51	0		0	0	1	100
14	5	51	0		0	0	1	100
14	7	51	0		0	0	1	100
14	11	51	0		0	0	1	100
14	14	50	1		1	0	0.980392	98.0392
14	16	50	1		0	0	0.980392	98.0392
14	18	50	1		0	0	0.980392	98.0392
14	21	48	3		2	0	0.941176	94.1176
14	23	48	3		0	0	0.941176	94.1176
14	25	48	3			0	0.941176	94.1176
14	28	48	3			0	0.941176	94.1176
14	30	48	3			0	0.941176	94.1176
14	32	48	3			0	0.941176	94.1176
14	35	48	3			0	0.941176	94.1176
14	37	48	3			0	0.941176	94.1176
14	39	48	3			0	0.941176	94.1176
14	42	48	3		0	0	0.941176	94.1176
14	44	48	3		0	0	0.941176	94.1176
15L	0	156	0		0	0	1	100
15	5	156	0		0	0	1	100
15	7	156	0		0	0	1	100
15	10	156	0		0	0	1	100
15	12	156	0		0	0	1	100
15	14	156	0		0	0	1	100
15	17	156	0		0	0	1	100
15	19	156	0		0	0	1	100
15	21	152	4		4	0	0.974359	97.4359
15	24	147	9		5	0	0.942308	94.2308
15	26	144	12		3	0	0.923077	92.3077
15	29	144	12		0	0	0.923077	92.3077
15	31	144	12		0	0	0.923077	92.3077
15	33	144	12		0	0	0.923077	92.3077
15	35	144	12		0	0	0.923077	92.3077
15	38	144	12		0	0	0.923077	92.3077
15	40	144	12		0	0	0.923077	92.3077
15		144	12		0	0	0.923077	92.3077
16	0	156	0		0	0	1	100
16	5	156	0		0	0	1	100
16	7	156	0	0	0	0	1	100
16	10	156	0	0	0	0	1	100
16	12	154	2	2	0	0	0.987179	98.7179
16	14	154	2	0	0	0	0.987179	98.7179
16	17	154	2	0	0	0	0.987179	98.7179
16	19	148	8	4	2	0	0.948718	94.8718
16	21	136	20	4	8	0	0.871795	87.1795
16	24	98	58	10	28	0	0.628205	62.8205
16	26	79	77	11	8	0	0.50641	50.641
16	29	27	129	52	0	0	0.173077	17.3077
16	31	18	138	9	0	0	0.115385	11.5385
16	33	7	149	11	0	0	0.0448718	4.48718
16	35	2	154	5	0	0	0.0128205	1.28205
16	38	1	155	1	0	0	0.00641026	0.641026
16	40	1	155	0	0	0	0.00641026	0.641026
16	42	0	156	1	0	0	0	0
17	0	134	0	0	0	0	1	100
17	5	134	0	0	0	0	1	100
17	7	134	0	0	0	0	1	100
17	10	134	0	0	0	0	1	100
17	12	132	2	2	0	0	0.985075	98.5075
17	14	132	2	0	0	0	0.985075	98.5075
17	17	132	2	0	0	0	0.985075	98.5075
17	19	124	10	4	4	0	0.925373	92.5373
17	21	109	25	5	10	0	0.813433	81.3433
17	24	90	44	10	9	0	0.671642	67.1642
17	26	70	64	15	5	0	0.522388	52.2388
17	29	34	100	36	0	0	0.253731	25.3731
17	31	23	111	11	0	0	0.171642	17.1642
17	33	3	131	20	0	0	0.0223881	2.23881
17	35	1	133	2	0	0	0.00746269	0.746269
17	38	1	133	0	0	0	0.00746269	0.746269
17	40	0	134	1	0	0	0	0
17		0	134	0	0	0	0	0
18	0	233	0	0	0	0	1	100
18	5	233	0	0	0	0	1	100
18	7	233	0	0	0	0	1	100
18	10	233	0	0	0	0	1	100
18	12	233	0	0	0	0	1	100
18	14	232	1	1	0	0	0.995708	99.5708
18	17	221	12	10	1	0	0.948498	94.8498
18	19	219	14	1	1	0	0.939914	93.9914
18	21	212	21	3	4	0	0.909871	90.9871
18	24	180	53	24	8	0	0.772532	77.2532
18	26	136	97	39	5	0	0.583691	58.3691
18	29	72	161	62	2	0	0.309013	30.9013
18	31	59	174	13	0	0	0.253219	25.3219
18	33	36	197	23	0	0	0.154506	15.4506
18	35	27	206	9	0	0	0.11588	11.588
18	38	15	218	12	0	0	0.0643777	6.43777
18	40	7	226	8	0	0	0.0300429	3.00429
18	42	7	226	0	0	0	0.0300429	3.00429
18	45	0	233	7	0	0	0	0
19	0	142	0	0	0	0	1	100
19	5	142	0	0	0	0	1	100
19	7	142	0	0	0	0	1	100
19	10	142	0	0	0	0	1	100
19	12	140	2	2	0	0	0.985915	98.5915
19	14	137	5	2	1	0	0.964789	96.4789
19	17	128	14	7	2	0	0.901408	90.1408
19	19	121	21	0	7	0	0.852113	85.2113
19	21	115	27	3	3	0	0.809859	80.9859
19	24	81	61	21	13	0	0.570423	57.0423
19	26	48	94	26	7	0	0.338028	33.8028
19	29	21	121	27	0	0	0.147887	14.7887
19	31	11	131	10	0	0	0.0774648	7.74648
19	33	2	140	9	0	0	0.0140845	1.40845
19	35	1	141	1	0	0	0.00704225	0.704225
19	38	0	142	1	0	0	0	0
19	40	0	142	0	0	0	0	0
19		0	142	0	0	0	0	0
20	0	227	0	0	0	0	1	100
20	5	227	0	0	0	0	1	100
20	7	227	0	0	0	0	1	100
20	10	227	0	0	0	0	1	100
20	12	224	3	3	0	0	0.986784	98.6784
20	14	224	3	0	0	0	0.986784	98.6784
20	17	214	13	8	2	0	0.942731	94.2731
20	19	202	25	5	7	0	0.889868	88.9868
20	21	180	47	10	12	0	0.792952	79.2952
20	24	116	111	31	33	0	0.511013	51.1013
20	26	86	141	26	4	0	0.378855	37.8855
20	29	21	206	59	6	0	0.092511	9.2511
20	31	7	220	14	0	0	0.030837	3.0837
20	33	1	226	6	0	0	0.00440529	0.440529
20	35	0	227	1	0	0	0	0
20	38	0	227	0	0	0	0	0
20	40	0	227	0	0	0	0	0
20		0	227	0	0	0	0	0
21	0	154	0	0	0	0	1	100
21	5	154	0	0	0	0	1	100
21	7	154	0	0	0	0	1	100
21	10	154	0	0	0	0	1	100
21	12	154	0	0	0	0	1	100
21	14	154	0	0	0	0	1	100
21	17	154	0	0	0	0	1	100
21	19	146	8	7	1	0	0.948052	94.8052
21	21	127	27	4	15	0	0.824675	82.4675
21	24	106	48	17	4	0	0.688312	68.8312
21	26	68	86	31	7	0	0.441558	44.1558
21	29	38	116	29	1	0	0.246753	24.6753
21	31	29	125	9	0	0	0.188312	18.8312
21	33	11	143	18	0	0	0.0714286	7.14286
21	35	5	149	6	0	0	0.0324675	3.24675
21	38	0	154	5	0	0	0	0
21	40	0	154	0	0	0	0	0
21		0	154	0	0	0	0	0

## Sheet: stats
% WT [73]					condition	chi	pvalue	corrected_pvalue
#days	dead	censored			WT v.s. fmo-2 OE	123.34	0	0
0	0				WT v.s. fmo-4 OE	107.71	0	0
3	2				WT v.s. fmo-4 OE hyp sp 6.3	64.99	0	0
4	45				WT v.s. fmo-4OE hyp sp 2.6	45.57	0	0
5	20				WT v.s. fmo-4KO	6.6	0.0102	0.051
6	6				fmo-2 OE v.s. WT	123.34	0	0
9					fmo-2 OE v.s. fmo-4 OE	10.33	0.0013	0.0065
11					fmo-2 OE v.s. fmo-4 OE hyp sp 6.3	42.14	0	0
13					fmo-2 OE v.s. fmo-4OE hyp sp 2.6	51.57	0	0
16					fmo-2 OE v.s. fmo-4KO	107.05	0	0
18					fmo-4 OE v.s. WT	107.71	0	0
20					fmo-4 OE v.s. fmo-2 OE	10.33	0.0013	0.0065
23					fmo-4 OE v.s. fmo-4 OE hyp sp 6.3	20.99	4.6e-06	2.3e-05
25					fmo-4 OE v.s. fmo-4OE hyp sp 2.6	31.4	2.1e-08	1.1e-07
27					fmo-4 OE v.s. fmo-4KO	89.02	0	0
30					fmo-4 OE hyp sp 6.3 v.s. WT	64.99	0	0
					fmo-4 OE hyp sp 6.3 v.s. fmo-2 OE	42.14	0	0
					fmo-4 OE hyp sp 6.3 v.s. fmo-4 OE	20.99	4.6e-06	2.3e-05
					fmo-4 OE hyp sp 6.3 v.s. fmo-4OE hyp sp 2.6	2.49	0.1144	0.5719
					fmo-4 OE hyp sp 6.3 v.s. fmo-4KO	42.53	0	0
					fmo-4OE hyp sp 2.6 v.s. WT	45.57	0	0
% fmo-2 OE [76]					fmo-4OE hyp sp 2.6 v.s. fmo-2 OE	51.57	0	0
#days	dead	censored			fmo-4OE hyp sp 2.6 v.s. fmo-4 OE	31.4	2.1e-08	1.1e-07
0	0				fmo-4OE hyp sp 2.6 v.s. fmo-4 OE hyp sp 6.3	2.49	0.1144	0.5719
3	0				fmo-4OE hyp sp 2.6 v.s. fmo-4KO	24.93	6e-07	3e-06
4	3				fmo-4KO v.s. WT	6.6	0.0102	0.051
5	6				fmo-4KO v.s. fmo-2 OE	107.05	0	0
6	11				fmo-4KO v.s. fmo-4 OE	89.02	0	0
9	10				fmo-4KO v.s. fmo-4 OE hyp sp 6.3	42.53	0	0
11	9				fmo-4KO v.s. fmo-4OE hyp sp 2.6	24.93	6e-07	3e-06
13	4
16	6
18	12
20	8
23	7
25
27
30
% fmo-4 OE [81]
#days	dead	censored
0	0
3	0
4	7
5	7
6	16
9	9
11	11
13	12
16	9
18	7
20	2
23	1
25
27
30
% fmo-4 OE hyp sp 6.3 [70]
#days	dead	censored
0	0
3	0
4	12
5	10
6	23
9	8
11	11
13	3
16	3
18
20
23
25
27
30
% fmo-4OE hyp sp 2.6 [61]
#days	dead	censored
0	0
3	0
4	14
5	11
6	21
9	6
11	6
13	2
16	1
18
20
23
25
27
30
% fmo-4KO [82]
#days	dead	censored
0	0
3	3
4	40
5	18
6	18
9	3
11
13
16
18
20
23
25
27
30

## Sheet: Sheet2
condition	chi	pvalue	corrected_pvalue
WT v.s. fmo-2 OE	27.63	1.5e-07	5.9e-07	****
WT v.s. fmo-4 OE	11.56	0.0007	0.0027	****
WT v.s. fmo-4 KO	0.43	0.511	1	ns
WT v.s. fmo-2O;4KO	2.16	0.142	0.5682	ns
fmo-2 OE v.s. WT	27.63	1.5e-07	5.9e-07
fmo-2 OE v.s. fmo-4 OE	8.78	0.003	0.0122
fmo-2 OE v.s. fmo-4 KO	46.84	0	0
fmo-2 OE v.s. fmo-2O;4KO	34.78	3.7e-09	1.5e-08
fmo-4 OE v.s. WT	11.56	0.0007	0.0027
fmo-4 OE v.s. fmo-2 OE	8.78	0.003	0.0122
fmo-4 OE v.s. fmo-4 KO	25.04	5.6e-07	2.2e-06
fmo-4 OE v.s. fmo-2O;4KO	9.93	0.0016	0.0065
fmo-4 KO v.s. WT	0.43	0.511	1
fmo-4 KO v.s. fmo-2 OE	46.84	0	0
fmo-4 KO v.s. fmo-4 OE	25.04	5.6e-07	2.2e-06
fmo-4 KO v.s. fmo-2O;4KO	8.62	0.0033	0.0133
fmo-2O;4KO v.s. WT	2.16	0.142	0.5682
fmo-2O;4KO v.s. fmo-2 OE	34.78	3.7e-09	1.5e-08
fmo-2O;4KO v.s. fmo-4 OE	9.93	0.0016	0.0065
fmo-2O;4KO v.s. fmo-4 KO	8.62	0.0033	0.0133

## Sheet: Sheet1
#1	N2								#1	N2					#1	N2
#2	Lei42	fmo-2p::MC; unc-119p::HIF-1(P621A); JT307 #1							#2	Lei42	fmo-2p::MC; unc-119p::HIF-1(P621A); JT307 #1				#11L	Lei51	fmo-2p::MC; JT307; gcy-31; gcy-36 - XA2262 sibling #1
#3	Lei43	fmo-2p::MC; unc-119p::HIF-1(P621A); JT307 #2							#3	Lei43	fmo-2p::MC; unc-119p::HIF-1(P621A); JT307 #2				#12L	Lei52	fmo-2p::MC; JT307; gcy-33; gcy-36 - XA2262 sibling #1
#4	Lei44	fmo-2p::MC; TU3311; CB5602 #1							#4	Lei44	fmo-2p::MC; TU3311; CB5602 #1				#13	Lei53	fmo-2p::MC; JT307; gcy-33; gcy-36 - XA2262 sibling #2
#5	Lei45	fmo-2p::MC; TU3311 #1							#5	Lei45	fmo-2p::MC; TU3311 #1				#14L	Lei55	fmo-2p::MC; JT307 - XA2262 sibling #1
#6	Lei46	fmo-2p::MC; CB5602 #1							#6	Lei46	fmo-2p::MC; CB5602 #1				#15L	Lei56	fmo-2p::MC; JT307 - XA2262 sibling #2
#7	Lei47	fmo-2p::MC; TU3311; CB5602 #2							#7	Lei47	fmo-2p::MC; TU3311; CB5602 #2				#16	Lei57	fmo-2p::MC - XA2262 sibling #1
#8L	Lei48	fmo-2p::MC; JT307; XA2262 #1													#17	Lei58	fmo-2p::MC - XA2262 sibling #2
#9	Lei49	fmo-2p::MC; JT307; XA2262 #2													#18	Lei59	fmo-2p::MC; gcy-33; gcy-36 - XA2262 sibling #1
#10L	Lei50	fmo-2p::MC; JT307; XA2262 #3							#1	N2					#19	Lei60	fmo-2p::MC; gcy-33; gcy-36 - XA2262 sibling #2
#11L	Lei51	fmo-2p::MC; JT307; gcy-31; gcy-36 - XA2262 sibling #1							#8L	Lei48	fmo-2p::MC; JT307; XA2262 #1
#12L	Lei52	fmo-2p::MC; JT307; gcy-33; gcy-36 - XA2262 sibling #1							#9	Lei49	fmo-2p::MC; JT307; XA2262 #2
#13	Lei53	fmo-2p::MC; JT307; gcy-33; gcy-36 - XA2262 sibling #2							#10L	Lei50	fmo-2p::MC; JT307; XA2262 #3
#14L	Lei55	fmo-2p::MC; JT307 - XA2262 sibling #1							#14L	Lei55	fmo-2p::MC; JT307 - XA2262 sibling #1
#15L	Lei56	fmo-2p::MC; JT307 - XA2262 sibling #2							#15L	Lei56	fmo-2p::MC; JT307 - XA2262 sibling #2
#16	Lei57	fmo-2p::MC - XA2262 sibling #1							#16	Lei57	fmo-2p::MC - XA2262 sibling #1
#17	Lei58	fmo-2p::MC - XA2262 sibling #2							#17	Lei58	fmo-2p::MC - XA2262 sibling #2
#18	Lei59	fmo-2p::MC; gcy-33; gcy-36 - XA2262 sibling #1							#20	Lei61	fmo-2p::MC; XA2262 #1
#19	Lei60	fmo-2p::MC; gcy-33; gcy-36 - XA2262 sibling #2							#21	Lei62	fmo-2p::MC; XA2262 #2
#20	Lei61	fmo-2p::MC; XA2262 #1
#21	Lei62	fmo-2p::MC; XA2262 #2
