# Supplementary material for: fmo-4 promotes longevity and stress resistance via ER to mitochondria calcium regulation in C. elegans
Source: eLife journal article supplement (doi:10.7554/elife.99971), 2024-08-27
Supplement: fig5-data1 [file elife-99971-fig5-data1-v1.zip]

## Sheet: 26feb
	4mcherry
	water							DR						carb							edta
	1	52327.4	920.097	303	4130			1	25311.1	1481.17	435	5158		1	31379.3	1265.85	401	6740			1	10775.8	855.369	431	4669
	2	58626.4	916.793	305	3457			2	27647.3	1543.43	464	6794		2	38560	1446.3	405	13645			2	24759.8	1423.43	570	5775
	3	77259.3	1075.66	381	4595			3	23770.6	1583.55	615	6794		3	17100.2	1543.51	458	5873			3	20103	1334.66	669	4319
	4	59844.1	1151.78	494	5085			4	25082.4	1677.79	615	5678		4	19504.8	1228.93	443	8789			4	19506.8	1260.22	596	4485
	5	56291.8	1156.64	576	4557			5	20789.2	1747.89	607	6427		5	30016.7	1124.13	259	8789			5	14558.7	1197.01	598	4033
	6	40858.8	1266.75	525	4812			6	20310.3	1410.19	515	5440		6	19340.6	1753.3	688	9768			6	27164.4	1467.69	488	5775
	7	47664.5	1184.15	525	4153			7	24828.2	1418.99	497	6812		7	30462.5	1638.25	527	8081			7	10265.6	1394.6	620	4887
	8	56615.9	1057.03	464	4150			8	23674.8	2388.1	445	9937		8	23238.8	1598.34	662	8032			8	14202.9	1445.75	538	4887
	9	42721.5	1141.64	462	4180			9	28374.5	1852.56	494	6640		9	33557.2	1607.9	372	7488			9	9737.74	1389.79	483	4083
	10	45949.7	1167.11	481	5010			10	35000	1132.58	404	6001		10	20245.7	1222.8	425	7618			10	12809	1035.38	457	3921
	11	69837	1242.37	425	3516			11	28830.1	1296.3	527	5965		11	31350	1476.47	601	8032			11	13542.1	1215.85	444	4351
	12	45468.3	1029.92	439	4698			12	17590.9	1794.46	412	6424		12	32714.6	1464.42	409	7691			12	12392.6	1278.53	571	4351
	13	52472.1	1060.59	462	4698			13	29344.2	1428.51	390	6859		13	32063.6	1254.14	447	6286			13	18470.6	1116.3	596	3023
	14	56206.9	996.617	333	4543			14	30184.9	1327.91	385	7749		14	29635.5	1120.87	247	8789			14	10533.4	1228.49	501	4569
	15	66070.8	1097.76	388	5847			15	27862.3	1899.13	613	6638		15	22783.3	1593.78	662	8032			15	123199	310.612	189	923
	16	52745.9	1105.08	486	4868			16	24951.4	1791.3	687	6927		16	23156.7	1344.69	568	6795
	17	55420.3	1141.73	393	4866			17	22691.4	1719.5	569	5033		17	20648.5	1497.23	426	9781
	18	47884.7	1225.08	439	5821			18	22451	1485.77	533	6239		18	36653.9	1605.87	536	8081
	19	55187.4	1451.28	472	4423			19	26935.7	1234	498	4368		19	57957.3	267.005	178	418
	20	59466.5	1296.97	444	3775			20	21137.2	1532.26	611	6859
	21	52450.1	1227.39	527	6499			21	94265.1	333.258	211	929
	22	140662	576.815	430	796

## Sheet: 26feb analysis
water control	Fluoresence Intentsity	BGC	Mean	Standard Dev		4mcherry DR	BGC	Mean	Standard Dev				4mcherry Carb	Fluoresence Intentsity	BGC	Mean	Standard Dev							4mcherry edta	Fluoresence Intentsity	BGC	Mean	Standard Dev
1	920.097	343.282	561.872	251.547		1481.17	1147.91	1254.01	284.685				1	1265.85	998.844	1165.59	191.611							1	855.369	544.757	949.607	172.531
2	916.793	339.978	561.872			1543.43	1210.17						2	1446.3	1179.3									2	1423.43	1112.82
3	1075.66	498.843				1583.55	1250.3						3	1543.51	1276.51									3	1334.66	1024.04
4	1151.78	574.96				1677.79	1344.53						4	1228.93	961.924									4	1260.22	949.613
5	1156.64	579.827				1747.89	1414.63						5	1124.13	857.122									5	1197.01	886.394
6	1266.75	689.939				1410.19	1076.93						6	1753.3	1486.3									6	1467.69	1157.08
7	1184.15	607.34				1418.99	1085.73						7	1638.25	1371.24										1394.6	1083.99
8	1057.03	480.215				2388.1	2054.84						8	1598.34	1331.34										1445.75	1135.14
9	1141.64	564.823				1852.56	1519.3						9	1607.9	1340.9										1389.79	1079.18
	1167.11	590.293				1132.58	799.32						10	1222.8	955.796										1035.38	724.769
	1242.37	665.556				1296.3	963.044						11	1476.47	1209.47										1215.85	905.237
	1029.92	453.102				1794.46	1461.2						12	1464.42	1197.42										1278.53	967.921
	1060.59	483.772				1428.51	1095.25						13	1254.14	987.135										1116.3	805.684
	996.617	419.802				1327.91	994.651						14	1120.87	853.868										1228.49	917.874
	1097.76	520.941				1899.13	1565.87						15	1593.78	1326.77										310.612
	1105.08	528.26				1791.3	1458.04						16	1344.69	1077.69
	1141.73	564.911				1719.5	1386.24						17	1497.23	1230.23
	1225.08	648.262				1485.77	1152.51						18	1605.87	1338.86
	1451.28	874.464				1234	900.745						20	267.005
	1296.97	720.155				1532.26	1199
	1227.39	650.577				333.258
	576.815
	control norm	dr norm	carb norm	edta norm															gfp Induction	0				gfp Induction	1.69008
	0.610962	2.04302	1.77771	0.96954
	0.605081	2.15383	2.09888	1.98055
	0.887824	2.22523	2.27188	1.82256
	1.02329	2.39295	1.712	1.69009
	1.03196	2.51771	1.52548	1.57757
	1.22793	1.91669	2.64526	2.05934
	1.08092	1.93235	2.44049	1.92924
	0.85467	3.65714	2.36947	2.02028
	1.00525	2.70401	2.38648	1.92068
	1.05058	1.4226	1.70109	1.28992
	1.18453	1.71399	2.15257	1.61111
	0.806416	2.6006	2.13112	1.72267
	0.861001	1.94929	1.75687	1.43393
	0.747149	1.77025	1.51969	1.6336
	0.927153	2.78688	2.36134
	0.940179	2.59497	1.91804
	1.00541	2.46719	2.18952
	1.15375	2.0512	2.38287
	1.55634	1.60312
	1.28171	2.13394
	1.15788

## Sheet: 23feb
	4mcherry water							dr							carb							edta
	1	72615.2	1166.08	545	6150			1	46538.1	1135.86	531	2433			1	56754.3	1099.94	554	4473			1	36302.9	1070.44	554	2613
	2	71586.4	1194.27	565	6150			2	62414.7	1171.78	590	3275			2	51556.5	1274.78	615	3928			2	48016.9	1242.82	552	4025
	3	66045.6	1162.85	520	3323			3	45081.3	1216.04	612	3513			3	61694.2	1253.64	607	6029			3	48702.8	1292.78	598	3245
	4	70050.9	1215.68	582	3361			4	45760.9	1215.32	653	3513			4	41972.7	1355.79	616	8437			4	54297	1305.43	574	3923
	5	68351.9	1259.66	576	5519			5	57386.8	1244.7	567	3100			5	62811.1	1066.7	555	4096			5	37476.5	1025.29	337	3340
	6	80852.4	1194.73	483	5519			6	37105.2	1266.23	557	5116			6	53790.5	1278.91	605	5261			6	58799.5	1251.41	502	4074
	7	74367.8	1138.95	506	3578			7	43794.4	1283.36	583	2347			7	48901	1281.6	579	5007			7	66316.2	1243.39	510	4074
	8	60416.7	1053.2	548	4050			8	58846.7	1227.25	614	3782			8	58692.5	1269.62	536	5904			8	68663.4	1347.54	523	4519
	9	74603.7	957.407	353	4311			9	43460.9	1278.28	771	3546			9	46538.1	1285.41	603	5904			9	54287.6	1315.86	517	3878
	10	56918	1101.34	411	4803			10	48989.1	1356.98	669	4720			10	39018.2	1370.95	732	4222			10	36696.2	1289.52	622	3817
	11	67395.4	1098.06	413	4527			11	63604	1187.78	586	3159			11	47828.1	1382.84	646	5755			11	54325.3	1227.99	430	3505
	12	61993.1	1076.34	353	3976			12	34377.3	1491.95	615	5154			12	41752.4	1329.91	657	6342			12	53051.1	1174.74	421	4045
	13	54388.3	1066.94	373	3489			13	64560.5	1244.49	613	3941			13	43656	1438.93	666	6659			13	80028.1	325.062	200	503
	14	60272	1199.47	376	4017			14	43495.5	1302.57	571	7088			14	42564.2	1354.92	643	5483
	15	68672.8	1145.53	426	4716			15	49791.4	1184.32	583	3774			15	49917.3	1314.17	644	4922
	16	54048.5	1059.38	369	3323			16	68015.2	1167.09	595	4117			16	45380.2	1348.92	573	6964
	17	178028	688.47	515	917			17	41063.4	1066.45	484	4751			17	39087.4	1395.35	552	7585
								18	52852.8	1221.98	511	6329			18	48671.3	1137.53	510	5827
								19	48680.7	1312.91	526	6329			19	40896.6	946	308	6023
								20	54164.9	1150.25	493	2471			20	45087.6	963.198	310	4898
								21	105627	332.401	195	528			21	67379.7	389.54	270	582

## Sheet: 23feb analysis
water control	Fluoresence Intentsity	BGC	Mean	Standard Dev		4mcherry DR	BGC	Mean	Standard Dev				4mcherry Carb	Fluoresence Intentsity	BGC	Mean	Standard Dev							4mcherry edta	Fluoresence Intentsity	BGC	Mean	Standard Dev
1	1166.08	477.614	442.148	203.413		1135.86	803.458	903.878	90.8086				1	1099.94	710.398	867.915	126.242							1	1070.44	745.376	907.205	97.9459
2	1194.27	505.796	442.148			1171.78	839.38						2	1274.78	885.238									2	1242.82	917.761
3	1162.85	474.384				1216.04	883.641						3	1253.64	864.097									3	1292.78	967.714
4	1215.68	527.215				1215.32	882.914						4	1355.79	966.251									4	1305.43	980.372
5	1259.66	571.19				1244.7	912.295						5	1066.7	677.16									5	1025.29	700.223
6	1194.73	506.257				1266.23	933.827						6	1278.91	889.375									6	1251.41	926.344
7	1138.95	450.48				1283.36	950.961						7	1281.6	892.064										1243.39	918.332
8	1053.2	364.733				1227.25	894.848						8	1269.62	880.077										1347.54	1022.48
9	957.407	268.937				1278.28	945.875						9	1285.41	895.871										1315.86	990.799
	1101.34	412.87				1356.98	1024.58						10	1370.95	981.411										1289.52	964.454
	1098.06	409.585				1187.78	855.383						11	1382.84	993.295										1227.99	902.925
	1076.34	387.866				1491.95	1159.55						12	1329.91	940.368										1174.74	849.682
	1066.94	378.467				1244.49	912.091						13	1438.93	1049.39										325.062
	1199.47	511.001				1302.57	970.167						14	1354.92	965.381
	1145.53	457.063				1184.32	851.919						15	1314.17	924.628
	1059.38	370.91				1167.09	834.684						16	1348.92	959.383
	688.47					1066.45	734.053						17	1395.35	1005.81
						1221.98	889.58						18	1137.53	747.992
						1312.91	980.51						20	946	556.46
						1150.25	817.853							963.198	573.658
						332.401								389.54
	control norm	dr norm	carb norm	edta norm															gfp Induction	0				gfp Induction	2.05181
	1.08021	1.81717	1.6067	1.68581
	1.14395	1.89841	2.00213	2.07569
	1.07291	1.99852	1.95432	2.18867
	1.19239	1.99687	2.18536	2.21729
	1.29185	2.06332	1.53152	1.58368
	1.14499	2.11202	2.01149	2.0951
	1.01884	2.15078	2.01757	2.07698
	0.824912	2.02387	1.99046	2.31253
	0.608251	2.13927	2.02618	2.24088
	0.933782	2.31729	2.21964	2.18129
	0.926353	1.93461	2.24652	2.04213
	0.877231	2.62253	2.12682	1.92171
	0.855974	2.06286	2.37339
	1.15572	2.19421	2.18339
	1.03373	1.92677	2.09122
	0.838882	1.88779	2.16982
		1.6602	2.27483
		2.01195	1.69172
		2.21761	1.25854
		1.84973	1.29743

## Sheet: 04mar
	water						dr						carb						edta
	1	79886.9	997.184	409	3389		1	16001.1	1028.97	289	3616		1	55117.3	1086.09	422	3162		1	13102.7	924.773	285	3659
	2	73139.2	996.724	445	2863		2	25158.5	1066.83	530	4775		2	50102.4	1143.46	446	4528		2	19166.6	1090.71	322	5088
	3	67287.4	1036.4	367	4097		3	22930.7	1207.76	452	8215		3	55235.5	1220.93	450	6593		3	18189.2	1438.41	415	6178
	4	57270.1	1024.96	390	3674		4	19625	1096.31	417	7125		4	76160	1373.55	525	6593		4	27779.4	1194.84	338	6639
	5	39637	1099.08	518	2322		5	23348.5	1473.68	531	10467		5	71356.6	1413.74	631	7323		5	23265.9	1091	352	4689
	6	51633	1086.18	451	3121		6	25215.1	1336.96	479	9505		6	59864.6	1212.16	499	4255		6	27050.1	1200.38	456	5419
	7	58838	1148.59	468	4421		7	18512.1	1371.12	678	5606		7	67424.3	1192.95	359	6026		7	25097.8	1254.23	414	5723
	8	42676.5	1154.3	429	3834		8	18002.4	1285.1	615	7948		8	75792.9	1148.37	336	6208		8	18262.4	1241.13	344	4828
	9	62132.5	1215.35	426	4052		9	18949.4	1400.06	574	6293		9	71829.5	1265.61	413	5067		9	19219.9	1324.66	316	9294
	10	68575.4	1018.03	422	5094		10	14485.9	1360.02	590	3315		10	63974.2	1262.21	472	3962		10	16332.5	1115.35	316	3983
	11	73932.5	921.34	344	3407		11	19703.1	1142.41	406	4653		11	59289.1	1449.93	586	5171		11	24397	1062.14	279	4689
	12	66064.8	1018.59	304	2350		12	16096.8	1206.83	573	5282		12	58853.6	1556.24	451	7649		12	19159.2	947.343	327	4689
	13	43420	1162.91	518	2430		13	10875.7	1073.2	482	4842		13	43410.6	1257.41	346	4037		13	15845	1009.99	261	4828
	14	56299.4	898.15	401	3991		14	17006.6	1432.55	591	6293		14	65280.9	1282.62	456	4747		14	22634.5	1219.63	390	4228
	15	67181.7	1058.98	483	3293		15	11766	1274.82	685	4246		15	65669.7	1250.1	422	4512		15	16944	1150.05	372	3644
	16	53138.7	1114.39	607	3941		16	13371	1232.08	573	5282		16	64752	1356.56	426	5453		16	23443.2	1171.92	281	6639
	17	73357	1241.31	638	4483		17	50647	341.341	215	539		17	64658.7	1232.77	457	5453		17	19879.8	229.724	156	381
	18	65884.4	1284.75	462	5081								18	50911.2	1370.69	558	4621
	19	70778	1239.61	484	4043								19	64929.3	1525.77	507	7649
	20	220012	570.697	341	1124								20	51987.6	349.808	231	546

## Sheet: 04mar analysis
water control	Fluoresence Intentsity	BGC	Mean	Standard Dev		4mcherry DR	BGC	Mean	Standard Dev				4mcherry Carb	Fluoresence Intentsity	BGC	Mean	Standard Dev							4mcherry edta	Fluoresence Intentsity	BGC	Mean	Standard Dev
1	997.184	426.487	519.663	235.517		1028.97	687.634	907.952	140.21				1	1086.09	736.277	944.988	128.14							1	924.773	695.049	922.561	134.155
2	996.724	426.027	519.663			1066.83	725.485						2	1143.46	793.655									2	1090.71	860.986
3	1036.4	465.703				1207.76	866.415						3	1220.93	871.118									3	1438.41	1208.69
4	1024.96	454.263				1096.31	754.964						4	1373.55	1023.74									4	1194.84	965.116
5	1099.08	528.384				1473.68	1132.34						5	1413.74	1063.93									5	1091	861.272
6	1086.18	515.481				1336.96	995.621						6	1212.16	862.355									6	1200.38	970.656
7	1148.59	577.888				1371.12	1029.78						7	1192.95	843.139										1254.23	1024.51
8	1154.3	583.603				1285.1	943.76						8	1148.37	798.559										1241.13	1011.41
9	1215.35	644.657				1400.06	1058.72						9	1265.61	915.806										1324.66	1094.93
	1018.03	447.332				1360.02	1018.68						10	1262.21	912.4										1115.35	885.627
	921.34	350.643				1142.41	801.067						11	1449.93	1100.12										1062.14	832.419
	1018.59	447.892				1206.83	865.484						12	1556.24	1206.43										947.343	717.619
	1162.91	592.215				1073.2	731.86						13	1257.41	907.601										1009.99	780.27
	898.15	327.453				1432.55	1091.21						14	1282.62	932.808										1219.63	989.907
	1058.98	488.284				1274.82	933.474						15	1250.1	900.287										1150.05	920.324
	1114.39	543.693				1232.08	890.738						16	1356.56	1006.75										1171.92	942.198
	1241.31	670.617				341.341							17	1232.77	882.957										229.724
	1284.75	714.056											18	1370.69	1020.89
	1239.61	668.917											20	1525.77	1175.96
	570.697													349.808
	control norm	dr norm	carb norm	edta norm															gfp Induction	0				gfp Induction	1.77531
	0.820699	1.32323	1.41684	1.3375
	0.819814	1.39607	1.52725	1.65682
	0.896164	1.66726	1.67631	2.3259
	0.874149	1.4528	1.97	1.8572
	1.01678	2.17898	2.04734	1.65737
	0.991953	1.9159	1.65945	1.86786
	1.11204	1.98163	1.62247	1.97149
	1.12304	1.8161	1.53669	1.94628
	1.24053	2.03732	1.76231	2.10701
	0.860812	1.96028	1.75575	1.70423
	0.674751	1.54151	2.11699	1.60184
	0.86189	1.66547	2.32156	1.38093
	1.13961	1.40834	1.74652	1.50149
	0.630126	2.09983	1.79503	1.9049
	0.939617	1.79631	1.73244	1.771
	1.04624	1.71407	1.93731	1.81309
	1.29048		1.6991
	1.37408		1.96452
	1.28721		2.26293

## Sheet: 08mar
	water						dr						carb							edta
