# Supplementary material for: fmo-4 promotes longevity and stress resistance via ER to mitochondria calcium regulation in C. elegans
Source: eLife journal article supplement (doi:10.7554/elife.99971), 2024-08-27
Supplement: fig5-data3 [file 2.12.2024 50uM Carbachol 50uM EDTA Water 3rd rep.xlsx]

## Sheet: lifespan
strain	day	alive	dead-total	dead-normal	dead-ruptured	censored	ratio-alive	percentage-alive
N2 water	0	88	0				1	100
N2 water	5	88	0				1	100
N2 water	7	88	0				1	100						1	2	3	4	5	6	7	8	9	10	11	12	13	14	15
N2 water	10	88	0	0			1	100			plot data here-->		day	WT; Water	FMO-4 OE; Water	FMO-4 KO; Water	WT; 50uM Carbachol	FMO-4 OE; 50uM Carbachol	FMO-4 KO; 50uM Carbachol	WT; 50uM EDTA	FMO-4 OE; 50uM EDTA	FMO-4 KO; 50uM EDTA
N2 water	13	88	0	0			1	100				0	0	100	100	100	100	100	100	100	100	100
N2 water	15	88	0	0			1	100				5	5	100	100	100	100	100	100	100	100	100
N2 water	17	87	1	1			0.988636	98.8636				7	7	100	100	100	100	100	100	100	100	100
N2 water	20	68	20	19			0.772727	77.2727				10	10	100	100	100	100	100	100	100	100	100
N2 water	22	54	34	14			0.613636	61.3636				13	13	100	100	100	100	100	100	99.0385	100	100
N2 water	24	39	49	15			0.443182	44.3182				15	15	100	97.7528	95.7447	97.1014	100	95.8763	99.0385	98.9474	96.3504
N2 water	27	13	75	26			0.147727	14.7727				17	17	98.8636	97.7528	78.7234	92.7536	96.4912	74.2268	97.1154	97.8947	83.9416
N2 water	29	5	83	8			0.0568182	5.68182				20	20	77.2727	95.5056	50	84.058	82.4561	40.2062	91.3462	92.6316	64.9635
N2 water	31	0	88	5			0	0				22	22	61.3636	89.8876	39.3617	73.913	66.6667	13.4021	83.6538	87.3684	39.4161
N2 water	34	0	88				0	0				24	24	44.3182	76.4045	13.8298	56.5217	52.6316	1.03093	57.6923	81.0526	16.7883
N2 water	36	0	88				0	0				27	27	14.7727	69.6629	6.38298	42.029	31.5789	0	43.2692	64.2105	0
N2 water	38	0	88				0	0				29	29	5.68182	51.6854	1.06383	13.0435	15.7895		23.0769	50.5263
N2 water	41	0	88				0	0				31	31	0	29.2135	0	1.44928	3.50877		5.76923	27.3684
N2 water	43	0	88				0	0				34	34		14.6067		0	0		0.961538	9.47368
N2 water	45	0	88				0	0				36	36		7.86517					0	2.10526
												38	38		0						0
4OE water	0	89	0				1	100				41	41								0
4OE water	5	89	0				1	100				43	43
4OE water	7	89	0				1	100				45	45
4OE water	10	89	0	0			1	100
4OE water	12	89	0	0			1	100
4OE water	14	87	2	2			0.977528	97.7528
4OE water	17	87	2	0			0.977528	97.7528
4OE water	19	85	4	2			0.955056	95.5056
4OE water	21	80	9	5			0.898876	89.8876
4OE water	24	68	21	12			0.764045	76.4045
4OE water	26	62	27	6			0.696629	69.6629
4OE water	28	46	43	16			0.516854	51.6854
4OE water	31	26	63	20			0.292135	29.2135
4OE water	33	13	76	13			0.146067	14.6067
4OE water	35	7	82	6			0.0786517	7.86517
4OE water	38	0	89	7			0	0
4OE water	40	0	89				0	0
4OE water	42	0	89				0	0
4OE water	45	0	89				0	0
4KO water	0	94	0				1	100
4KO water	5	94	0				1	100
4KO water	7	94	0				1	100
4KO water	10	94	0	0			1	100
4KO water	12	94	0	0			1	100
4KO water	14	90	4	4			0.957447	95.7447
4KO water	17	74	20	16			0.787234	78.7234
4KO water	19	47	47	27			0.5	50
4KO water	21	37	57	10			0.393617	39.3617
4KO water	24	13	81	24			0.138298	13.8298
4KO water	26	6	88	7			0.0638298	6.38298
4KO water	28	1	93	5			0.0106383	1.06383
4KO water	31	0	94	1			0	0
4KO water	33	0	94				0	0
4KO water	35	0	94				0	0
4KO water	38	0	94				0	0
4KO water	40	0	94				0	0
4KO water	42	0	94				0	0
4KO water	45	0	94				0	0
WT carb	0	69	0				1	100
WT carb	5	69	0				1	100
WT carb	7	69	0				1	100
WT carb	10	69	0	0			1	100
WT carb	12	69	0	0			1	100
WT carb	14	67	2	2			0.971014	97.1014
WT carb	17	64	5	3			0.927536	92.7536
WT carb	19	59	10	5			0.855072	85.5072
WT carb	21	52	17	7			0.753623	75.3623
WT carb	24	40	29	12			0.57971	57.971
WT carb	26	30	39	10			0.434783	43.4783
WT carb	28	10	59	20			0.144928	14.4928
WT carb	31	2	67	8			0.0289855	2.89855
WT carb	33	1	68	1			0.0144928	1.44928
WT carb	35	1	68				0.0144928	1.44928
WT carb	38	1	68				0.0144928	1.44928
WT carb	40	1	68				0.0144928	1.44928
WT carb	42	1	68				0.0144928	1.44928
WT carb	45	1	68				0.0144928	1.44928
4OE carb	0	57	0				1	100
4OE carb	5	57	0				1	100
4OE carb	7	57	0				1	100
4OE carb	10	57	0	0			1	100
4OE carb	12	57	0	0			1	100
4OE carb	14	57	0	0			1	100
4OE carb	17	55	2	2			0.964912	96.4912
4OE carb	19	47	10	8			0.824561	82.4561
4OE carb	21	38	19	9			0.666667	66.6667
4OE carb	24	30	27	8			0.526316	52.6316
4OE carb	26	18	39	12			0.315789	31.5789
4OE carb	28	9	48	9			0.157895	15.7895
4OE carb	31	2	55	7			0.0350877	3.50877
4OE carb	33	0	57	2			0	0
4OE carb	35	0	57				0	0
4OE carb	38	0	57				0	0
4OE carb	40	0	57				0	0
4OE carb	42	0	57				0	0
4OE carb	45	0	57				0	0
4KO carb	0	97	0				1	100
4KO carb	5	97	0				1	100
4KO carb	7	97	0				1	100
4KO carb	10	97	0	0			1	100
4KO carb	12	97	0	0			1	100
4KO carb	14	93	4	4			0.958763	95.8763
4KO carb	17	72	25	21			0.742268	74.2268
4KO carb	19	39	58	33			0.402062	40.2062
4KO carb	21	13	84	26			0.134021	13.4021
4KO carb	24	1	96	12			0.0103093	1.03093
4KO carb	26	0	97	1			0	0
4KO carb	28	0	97				0	0
4KO carb	31	0	97				0	0
4KO carb	33	0	97				0	0
4KO carb	35	0	97				0	0
4KO carb	38	0	97				0	0
4KO carb	40	0	97				0	0
4KO carb	42	0	97				0	0
4KO carb	45	0	97				0	0
WT edta	0	104	0				1	100
WT edta	5	104	0				1	100
WT edta	7	104	0				1	100
WT edta	10	104	0	0			1	100
WT edta	12	103	1	1			0.990385	99.0385
WT edta	14	103	1	0			0.990385	99.0385
WT edta	17	101	3	2			0.971154	97.1154
WT edta	19	95	9	6			0.913462	91.3462
WT edta	21	87	17	8			0.836538	83.6538
WT edta	24	60	44	27			0.576923	57.6923
WT edta	26	45	59	15			0.432692	43.2692
WT edta	28	24	80	21			0.230769	23.0769
WT edta	31	6	98	18			0.0576923	5.76923
WT edta	33	1	103	5			0.00961538	0.961538
WT edta	35	0	104	1			0	0
WT edta	38	0	104				0	0
WT edta	40	0	104				0	0
WT edta	42	0	104				0	0
WT edta	45	0	104				0	0
4OE edta	0	95	0				1	100
4OE edta	5	95	0				1	100
4OE edta	7	95	0				1	100
4OE edta	10	95	0	0			1	100
4OE edta	12	95	0	0			1	100
4OE edta	14	94	1	1			0.989474	98.9474
4OE edta	17	93	2	1			0.978947	97.8947
4OE edta	19	88	7	5			0.926316	92.6316
4OE edta	21	83	12	5			0.873684	87.3684
4OE edta	24	77	18	6			0.810526	81.0526
4OE edta	26	61	34	16			0.642105	64.2105
4OE edta	28	48	47	13			0.505263	50.5263
4OE edta	31	26	69	22			0.273684	27.3684
4OE edta	33	9	86	17			0.0947368	9.47368
4OE edta	35	2	93	7			0.0210526	2.10526
4OE edta	38	0	95	2			0	0
4OE edta	40	0	95				0	0
4OE edta	42	0	95				0	0
4OE edta	45
4KO edta	0	137	0				1	100
4KO edta	5	137	0				1	100
4KO edta	7	137	0				1	100
4KO edta	10	137	0	0			1	100
4KO edta	12	137	0	0			1	100
4KO edta	14	132	5	5			0.963504	96.3504
4KO edta	17	115	22	17			0.839416	83.9416
4KO edta	19	89	48	26			0.649635	64.9635
4KO edta	21	54	83	35			0.394161	39.4161
4KO edta	24	23	114	31			0.167883	16.7883
4KO edta	26	0	137	23			0	0
4KO edta	28	0	137				0	0
4KO edta	31	0	137				0	0
4KO edta	33	0	137				0	0
4KO edta	35	0	137				0	0
4KO edta	38	0	137				0	0
4KO edta	40	0	137				0	0
4KO edta	42	0	137				0	0
4KO edta	45	0	137				0	0
4KO edta	47	0	137				0	0
4KO itr1	5	0	0				#DIV/0!	#DIV/0!
4KO itr1	7	0	0				#DIV/0!	#DIV/0!
4KO itr1	10	0	0				#DIV/0!	#DIV/0!
4KO itr1	12	0	0				#DIV/0!	#DIV/0!
4KO itr1	14	0	0				#DIV/0!	#DIV/0!
4KO itr1	17	0	0				#DIV/0!	#DIV/0!
4KO itr1	19	0	0				#DIV/0!	#DIV/0!
4KO itr1	21	0	0				#DIV/0!	#DIV/0!
4KO itr1	24	0	0				#DIV/0!	#DIV/0!
4KO itr1	26	0	0				#DIV/0!	#DIV/0!
4KO itr1	28	0	0				#DIV/0!	#DIV/0!
4KO itr1	31	0	0				#DIV/0!	#DIV/0!
4KO itr1	33	0	0				#DIV/0!	#DIV/0!
4KO itr1	35	0	0				#DIV/0!	#DIV/0!
4KO itr1	38	0	0				#DIV/0!	#DIV/0!
4KO itr1	40	0	0				#DIV/0!	#DIV/0!
4KO itr1	42	0	0				#DIV/0!	#DIV/0!
4KO itr1	45
WT scl5	0	120	0				1	100
WT scl5	5	120	0				1	100
WT scl5	7	120	0				1	100
WT scl5	10	120	0				1	100
WT scl5	12	120	0				1	100
WT scl5	14	120	0				1	100
WT scl5	17	120	0				1	100
WT scl5	19	120	0				1	100
WT scl5	21	120	0				1	100
WT scl5	24	120	0				1	100
WT scl5	26	120	0				1	100
WT scl5	28	120	0				1	100
WT scl5	31	120	0				1	100
WT scl5	33	120	0				1	100
WT scl5	35	120	0				1	100
WT scl5	38	120	0				1	100
WT scl5	40	120	0				1	100
WT scl5	42	120	0				1	100
WT scl5	45	120	0				1	100
4OE scl5	0	117	0				1	100
4OE scl5	5	117	0				1	100
4OE scl5	7	117	0				1	100
4OE scl5	10	117	0				1	100
4OE scl5	12	117	0				1	100
4OE scl5	14	117	0				1	100
4OE scl5	17	117	0				1	100
4OE scl5	19	117	0				1	100
4OE scl5	21	117	0				1	100
4OE scl5	24	117	0				1	100
4OE scl5	26	117	0				1	100
4OE scl5	28	117	0				1	100
4OE scl5	31	117	0				1	100
4OE scl5	33	117	0				1	100
4OE scl5	35	117	0				1	100
4OE scl5	38	117	0				1	100
4OE scl5	40	117	0				1	100
4OE scl5	42	117	0				1	100
4OE scl5	45
4KO scl5	0	104	0				1	100
4KO scl5	5	104	0				1	100
4KO scl5	7	104	0				1	100
4KO scl5	10	104	0				1	100
4KO scl5	12	104	0				1	100
4KO scl5	14	104	0				1	100
4KO scl5	17	104	0				1	100
4KO scl5	19	104	0				1	100
4KO scl5	21	104	0				1	100
4KO scl5	24	104	0				1	100
4KO scl5	26	104	0				1	100
4KO scl5	28	104	0				1	100
4KO scl5	31	104	0				1	100
4KO scl5	33	104	0				1	100
4KO scl5	35	104	0				1	100
4KO scl5	38	104	0				1	100
4KO scl5	40	104	0				1	100
4KO scl5	42	104	0				1	100
4KO scl5	45
WT 50-50	0	123	0			0	1	100
WT 50-50	5	123	0			0	1	100
WT 50-50	7	123	0			0	1	100
WT 50-50	10	123	0			0	1	100
WT 50-50	12	123	0			0	1	100
WT 50-50	14	123	0			0	1	100
WT 50-50	17	123	0			0	1	100
WT 50-50	19	123	0			0	1	100
WT 50-50	21	123	0			0	1	100
WT 50-50	24	123	0			0	1	100
WT 50-50	26	123	0			0	1	100
WT 50-50	28	123	0			0	1	100
WT 50-50	31	123	0			0	1	100
WT 50-50	33	123	0			0	1	100
WT 50-50	35	123	0			0	1	100
WT 50-50	38	123	0			0	1	100
WT 50-50	40	123	0			0	1	100
WT 50-50	42	123	0			0	1	100
WT 50-50	45	123	0			0	1	100
4OE 50-50	0	117	0			0	1	100
4OE 50-50	5	117	0			0	1	100
4OE 50-50	7	117	0			0	1	100
4OE 50-50	10	117	0			0	1	100
4OE 50-50	12	117	0			0	1	100
4OE 50-50	14	117	0			0	1	100
4OE 50-50	17	117	0			0	1	100
4OE 50-50	19	117	0			0	1	100
4OE 50-50	21	117	0			0	1	100
4OE 50-50	24	117	0			0	1	100
4OE 50-50	26	117	0			0	1	100
4OE 50-50	28	117	0			0	1	100
4OE 50-50	31	117	0			0	1	100
4OE 50-50	33	117	0			0	1	100
4OE 50-50	35	117	0			0	1	100
4OE 50-50	38	117	0			0	1	100
4OE 50-50	40	117	0			0	1	100
4OE 50-50	42	117	0			0	1	100
4OE 50-50	45	117	0			0	1	100
		117
4KO 5050	0	114	0				1	100
4KO 5050	5	114	0				1	100
4KO 5050	7	114	0				1	100
4KO 5050	10	114	0				1	100
4KO 5050	12	114	0				1	100
4KO 5050	14	114	0				1	100
4KO 5050	17	114	0				1	100
4KO 5050	19	114	0				1	100
4KO 5050	21	114	0				1	100
4KO 5050	24	114	0				1	100
4KO 5050	26	114	0				1	100
4KO 5050	28	114	0				1	100
4KO 5050	31	114	0				1	100
4KO 5050	33	114	0				1	100
4KO 5050	35	114	0				1	100
4KO 5050	38	114	0				1	100
4KO 5050	40	114	0				1	100
4KO 5050	42	114	0				1	100
4KO 5050	45	114	0				1	100
							0

## Sheet: stats carbachol
% WT water [88]					condition	chi	pvalue	corrected_pvalue
#days	dead	censored			WT water v.s. fmo-4 OE water	62.71	0	0
0					WT water v.s. WT fmo-4 KO water	20.37	6.4e-06	3.2e-05
5					WT water v.s. WT carbachol	9.9	0.0017	0.0083
7					WT water v.s. fmo-4 OE carbachol	4.38	0.0365	0.1823
10	0				WT water v.s. fmo-4 KO carbachol	67.46	0	0
13	0				fmo-4 OE water v.s. WT water	62.71	0	0
15	0				fmo-4 OE water v.s. WT fmo-4 KO water	103.93	0	0
17	1				fmo-4 OE water v.s. WT carbachol	23.58	1.2e-06	6e-06
20	19				fmo-4 OE water v.s. fmo-4 OE carbachol	30.19	3.9e-08	2e-07
22	14				fmo-4 OE water v.s. fmo-4 KO carbachol	143.96	0	0
24	15				WT fmo-4 KO water v.s. WT water	20.37	6.4e-06	3.2e-05
27	26				WT fmo-4 KO water v.s. fmo-4 OE water	103.93	0	0
29	8				WT fmo-4 KO water v.s. WT carbachol	39.72	0	0
31	5				WT fmo-4 KO water v.s. fmo-4 OE carbachol	27.29	1.8e-07	8.8e-07
34					WT fmo-4 KO water v.s. fmo-4 KO carbachol	13.01	0.0003	0.0016
36					WT carbachol v.s. WT water	9.9	0.0017	0.0083
38					WT carbachol v.s. fmo-4 OE water	23.58	1.2e-06	6e-06
41					WT carbachol v.s. WT fmo-4 KO water	39.72	0	0
43					WT carbachol v.s. fmo-4 OE carbachol	0.58	0.4481	1
45					WT carbachol v.s. fmo-4 KO carbachol	80.03	0	0
					fmo-4 OE carbachol v.s. WT water	4.38	0.0365	0.1823
% fmo-4 OE water [89]					fmo-4 OE carbachol v.s. fmo-4 OE water	30.19	3.9e-08	2e-07
#days	dead	censored			fmo-4 OE carbachol v.s. WT fmo-4 KO water	27.29	1.8e-07	8.8e-07
0					fmo-4 OE carbachol v.s. WT carbachol	0.58	0.4481	1
5					fmo-4 OE carbachol v.s. fmo-4 KO carbachol	62.67	0	0
7					fmo-4 KO carbachol v.s. WT water	67.46	0	0
10	0				fmo-4 KO carbachol v.s. fmo-4 OE water	143.96	0	0
13	0				fmo-4 KO carbachol v.s. WT fmo-4 KO water	13.01	0.0003	0.0016
15	2				fmo-4 KO carbachol v.s. WT carbachol	80.03	0	0
17	0				fmo-4 KO carbachol v.s. fmo-4 OE carbachol	62.67	0	0
20	2
22	5
24	12
27	6
29	16
31	20
34	13
36	6
38	7
41
43
45
% WT fmo-4 KO water [94]
#days	dead	censored
0
5
7
10	0
13	0
15	4
17	16
20	27
22	10
24	24
27	7
29	5
31	1
34
36
38
41
43
45
% WT carbachol [69]
#days	dead	censored
0
5
7
10	0
13	0
15	2
17	3
20	5
22	7
24	12
27	10
29	20
31	8
34	1
36
38
41
43
45
% fmo-4 OE carbachol [57]
#days	dead	censored
0
5
7
10	0
13	0
15	0
17	2
20	8
22	9
24	8
27	12
29	9
31	7
34	2
36
38
41
43
45
% fmo-4 KO carbachol [97]
#days	dead	censored
0
5
7
10	0
13	0
15	4
17	21
20	33
22	26
24	12
27	1
29
31
34
36
38
41
43
45

## Sheet: stats edta
% WT water [88]						condition	chi	pvalue	corrected_pvalue
#days	dead	censored				WT water v.s. fmo-4 OE water	62.71	0	0
0						WT water v.s. WT fmo-4 KO water	20.37	6.4e-06	3.2e-05
5						WT water v.s. WT edta	19	1.3e-05	0.0001
7						WT water v.s. fmo-4 OE edta	60.87	0	0
10	0					WT water v.s. fmo-4 KO edta	26.18	3.1e-07	1.6e-06
13	0					fmo-4 OE water v.s. WT water	62.71	0	0
15	0					fmo-4 OE water v.s. WT fmo-4 KO water	103.93	0	0
17	1					fmo-4 OE water v.s. WT edta	25.67	4e-07	2e-06
20	19					fmo-4 OE water v.s. fmo-4 OE edta	0.92	0.3377	1
22	14					fmo-4 OE water v.s. fmo-4 KO edta	126.15	0	0
24	15					WT fmo-4 KO water v.s. WT water	20.37	6.4e-06	3.2e-05
27	26					WT fmo-4 KO water v.s. fmo-4 OE water	103.93	0	0
29	8					WT fmo-4 KO water v.s. WT edta	63.76	0	0
31	5					WT fmo-4 KO water v.s. fmo-4 OE edta	105.52	0	0
34						WT fmo-4 KO water v.s. fmo-4 KO edta	0.07	0.7943	1
36						WT edta v.s. WT water	19	1.3e-05	0.0001
38						WT edta v.s. fmo-4 OE water	25.67	4e-07	2e-06
41						WT edta v.s. WT fmo-4 KO water	63.76	0	0
43						WT edta v.s. fmo-4 OE edta	21.79	3e-06	1.5e-05
45						WT edta v.s. fmo-4 KO edta	82.56	0	0
						fmo-4 OE edta v.s. WT water	60.87	0	0
% fmo-4 OE water [89]						fmo-4 OE edta v.s. fmo-4 OE water	0.92	0.3377	1
#days	dead	censored				fmo-4 OE edta v.s. WT fmo-4 KO water	105.52	0	0
0						fmo-4 OE edta v.s. WT edta	21.79	3e-06	1.5e-05
5						fmo-4 OE edta v.s. fmo-4 KO edta	126.38	0	0
7						fmo-4 KO edta v.s. WT water	26.18	3.1e-07	1.6e-06
10	0					fmo-4 KO edta v.s. fmo-4 OE water	126.15	0	0
13	0					fmo-4 KO edta v.s. WT fmo-4 KO water	0.07	0.7943	1
15	2					fmo-4 KO edta v.s. WT edta	82.56	0	0
17	0					fmo-4 KO edta v.s. fmo-4 OE edta	126.38	0	0
20	2
22	5
24	12
27	6
29	16
31	20
34	13
36	6
38	7
41
43
45
% WT fmo-4 KO water [94]
#days	dead	censored
0
5
7
10	0
13	0
15	4
17	16
20	27
22	10
24	24
27	7
29	5
31	1
34
36
38
41
43
45
% WT edta [104]
#days	dead	censored
0
5
7
10	0
13	1
15	0
17	2
20	6
22	8
24	27
27	15
29	21
31	18
34	5
36	1
38
41
43
45
% fmo-4 OE edta [95]
#days	dead	censored
0
5
7
10	0
13	0
15	1
17	1
20	5
22	5
24	6
27	16
29	13
31	22
34	17
36	7
38	2
41
43
45
% fmo-4 KO edta [137]
#days	dead	censored
0
5
7
10	0
13	0
15	5
17	17
20	26
22	35
24	31
27	23
29
31
34
36
38
41
43
45

## Sheet: stats atf-4
% WT EV [119]								condition	chi	pvalue	corrected_pvalue
#days	dead	censored						WT EV v.s. WT atf4	12.96	0.0003	0.0029	****
0								WT EV v.s. C9 atf4	42.64	0	0	****
5								WT EV v.s. fmo2 atf4	0.68	0.4106	1	NS
7								WT EV v.s. 4OE atf4	39.94	0	0	****
9	0							WT EV v.s. 4KO atf4	0.12	0.7286	1	NS
13	1							WT EV v.s. fmo-2 OE EV	49.67	0	0	****
15	4							WT EV v.s. fmo-4 OE EV	53.7	0	0	****
17	7							WT EV v.s. fmo-4 KO EV	2.67	0.1022	0.9196
20	13							WT EV v.s. fmo-2 KO EV	0.01	0.9183	1
22	12							WT atf4 v.s. WT EV	12.96	0.0003	0.0029
24	31							WT atf4 v.s. C9 atf4	19.14	1.2e-05	0.0001
27	34							WT atf4 v.s. fmo2 atf4	17.05	3.6e-05	0.0003
29	9							WT atf4 v.s. 4OE atf4	10.92	0.001	0.0086
31	8							WT atf4 v.s. 4KO atf4	9.11	0.0025	0.0228
34								WT atf4 v.s. fmo-2 OE EV	22.68	1.9e-06	1.7e-05
36								WT atf4 v.s. fmo-4 OE EV	27.03	2e-07	1.8e-06
38								WT atf4 v.s. fmo-4 KO EV	25.49	4.4e-07	4e-06
41								WT atf4 v.s. fmo-2 KO EV	10.21	0.0014	0.0126
43								C9 atf4 v.s. WT EV	42.64	0	0
45								C9 atf4 v.s. WT atf4	19.14	1.2e-05	0.0001
								C9 atf4 v.s. fmo2 atf4	40.62	0	0
% WT atf4 [115]								C9 atf4 v.s. 4OE atf4	3.01	0.0826	0.7435
#days	dead	censored						C9 atf4 v.s. 4KO atf4	34.45	4.4e-09	3.9e-08
0								C9 atf4 v.s. fmo-2 OE EV	0.39	0.5315	1
5								C9 atf4 v.s. fmo-4 OE EV	0.64	0.4252	1
7								C9 atf4 v.s. fmo-4 KO EV	53.23	0	0
9	0							C9 atf4 v.s. fmo-2 KO EV	36.3	0	0
13	1							fmo2 atf4 v.s. WT EV	0.68	0.4106	1
15	4							fmo2 atf4 v.s. WT atf4	17.05	3.6e-05	0.0003
17	1							fmo2 atf4 v.s. C9 atf4	40.62	0	0
20	5							fmo2 atf4 v.s. 4OE atf4	40.58	0	0
22	8							fmo2 atf4 v.s. 4KO atf4	0.14	0.7086	1
24	26							fmo2 atf4 v.s. fmo-2 OE EV	46.4	0	0
27	24							fmo2 atf4 v.s. fmo-4 OE EV	49.75	0	0
29	36							fmo2 atf4 v.s. fmo-4 KO EV	0.53	0.4661	1
31	10							fmo2 atf4 v.s. fmo-2 KO EV	0.42	0.5179	1
34								4OE atf4 v.s. WT EV	39.94	0	0
36								4OE atf4 v.s. WT atf4	10.92	0.001	0.0086
38								4OE atf4 v.s. C9 atf4	3.01	0.0826	0.7435
41								4OE atf4 v.s. fmo2 atf4	40.58	0	0
43								4OE atf4 v.s. 4KO atf4	29.87	4.6e-08	4.2e-07
45								4OE atf4 v.s. fmo-2 OE EV	4.87	0.0274	0.2463
								4OE atf4 v.s. fmo-4 OE EV	6.53	0.0106	0.0952
								4OE atf4 v.s. fmo-4 KO EV	53.4	0	0
% C9 atf4 [109]								4OE atf4 v.s. fmo-2 KO EV	31	2.6e-08	2.3e-07
#days	dead	censored						4KO atf4 v.s. WT EV	0.12	0.7286	1
0								4KO atf4 v.s. WT atf4	9.11	0.0025	0.0228
5								4KO atf4 v.s. C9 atf4	34.45	4.4e-09	3.9e-08
7								4KO atf4 v.s. fmo2 atf4	0.14	0.7086	1
9	0							4KO atf4 v.s. 4OE atf4	29.87	4.6e-08	4.2e-07
13	0							4KO atf4 v.s. fmo-2 OE EV	39.7	0	0
15	3							4KO atf4 v.s. fmo-4 OE EV	43.09	0	0
17	5							4KO atf4 v.s. fmo-4 KO EV	1.11	0.2925	1
20	5							4KO atf4 v.s. fmo-2 KO EV	0.01	0.9399	1
22	7							fmo-2 OE EV v.s. WT EV	49.67	0	0
24	14							fmo-2 OE EV v.s. WT atf4	22.68	1.9e-06	1.7e-05
27	12							fmo-2 OE EV v.s. C9 atf4	0.39	0.5315	1
29	25							fmo-2 OE EV v.s. fmo2 atf4	46.4	0	0
31	19							fmo-2 OE EV v.s. 4OE atf4	4.87	0.0274	0.2463
34	10							fmo-2 OE EV v.s. 4KO atf4	39.7	0	0
36	7							fmo-2 OE EV v.s. fmo-4 OE EV	0.01	0.9312	1
38	2							fmo-2 OE EV v.s. fmo-4 KO EV	59.81	0	0
41								fmo-2 OE EV v.s. fmo-2 KO EV	40.57	0	0
43								fmo-4 OE EV v.s. WT EV	53.7	0	0
45								fmo-4 OE EV v.s. WT atf4	27.03	2e-07	1.8e-06
								fmo-4 OE EV v.s. C9 atf4	0.64	0.4252	1
								fmo-4 OE EV v.s. fmo2 atf4	49.75	0	0
								fmo-4 OE EV v.s. 4OE atf4	6.53	0.0106	0.0952
% fmo2 atf4 [77]								fmo-4 OE EV v.s. 4KO atf4	43.09	0	0
#days	dead	censored						fmo-4 OE EV v.s. fmo-2 OE EV	0.01	0.9312	1
0								fmo-4 OE EV v.s. fmo-4 KO EV	64.02	0	0
5								fmo-4 OE EV v.s. fmo-2 KO EV	44.86	0	0
7								fmo-4 KO EV v.s. WT EV	2.67	0.1022	0.9196
9	0							fmo-4 KO EV v.s. WT atf4	25.49	4.4e-07	4e-06
13	0							fmo-4 KO EV v.s. C9 atf4	53.23	0	0
15	7							fmo-4 KO EV v.s. fmo2 atf4	0.53	0.4661	1
17	2							fmo-4 KO EV v.s. 4OE atf4	53.4	0	0
20	5							fmo-4 KO EV v.s. 4KO atf4	1.11	0.2925	1
22	10							fmo-4 KO EV v.s. fmo-2 OE EV	59.81	0	0
24	26							fmo-4 KO EV v.s. fmo-4 OE EV	64.02	0	0
27	16							fmo-4 KO EV v.s. fmo-2 KO EV	1.89	0.1691	1
29	9							fmo-2 KO EV v.s. WT EV	0.01	0.9183	1
31	2							fmo-2 KO EV v.s. WT atf4	10.21	0.0014	0.0126
34								fmo-2 KO EV v.s. C9 atf4	36.3	0	0
36								fmo-2 KO EV v.s. fmo2 atf4	0.42	0.5179	1	NS
38								fmo-2 KO EV v.s. 4OE atf4	31	2.6e-08	2.3e-07
41								fmo-2 KO EV v.s. 4KO atf4	0.01	0.9399	1
43								fmo-2 KO EV v.s. fmo-2 OE EV	40.57	0	0
45								fmo-2 KO EV v.s. fmo-4 OE EV	44.86	0	0
								fmo-2 KO EV v.s. fmo-4 KO EV	1.89	0.1691	1
% 4OE atf4 [121]
#days	dead	censored
0
5
7
9	0
13	0
15	4
17	1
20	4
22	7
24	14
27	29
29	35
31	15
34	9
36	3
38
41
43
45
% 4KO atf4 [82]
#days	dead	censored
0
5
7
9	0
13	7
15	6
17	5
20	12
22	5
24	15
27	14
29	10
31	8
34
36
38
41
43
45
% fmo-2 OE EV [112]
#days	dead	censored
0
5
7
9	0
13	1
15	1
17	4
20	6
22	6
24	11
27	19
29	25
31	15
34	14
36	6
38	2
41	0
43	2
45
% fmo-4 OE EV [117]
#days	dead	censored
0
5
7
9	0
13	2
15	2
17	4
20	5
22	6
24	13
27	14
29	26
31	19
34	17
36	4
38	5
41
43
45
% fmo-4 KO EV [100]
#days	dead	censored
0
5
7
9	0
13	4
15	7
17	5
20	13
22	10
24	27
27	21
29	11
31	2
34
36
38
41
43
45
% fmo-2 KO EV [86]
#days	dead	censored
0
5
7
9	0
13	3
15	5
17	9
20	8
22	10
24	14
27	15
29	19
31	3
34
36
38
41
43
45

## Sheet: Sheet1
#1	N2								#1	N2					#1	N2
#2	Lei42	fmo-2p::MC; unc-119p::HIF-1(P621A); JT307 #1							#2	Lei42	fmo-2p::MC; unc-119p::HIF-1(P621A); JT307 #1				#11L	Lei51	fmo-2p::MC; JT307; gcy-31; gcy-36 - XA2262 sibling #1
#3	Lei43	fmo-2p::MC; unc-119p::HIF-1(P621A); JT307 #2							#3	Lei43	fmo-2p::MC; unc-119p::HIF-1(P621A); JT307 #2				#12L	Lei52	fmo-2p::MC; JT307; gcy-33; gcy-36 - XA2262 sibling #1
#4	Lei44	fmo-2p::MC; TU3311; CB5602 #1							#4	Lei44	fmo-2p::MC; TU3311; CB5602 #1				#13	Lei53	fmo-2p::MC; JT307; gcy-33; gcy-36 - XA2262 sibling #2
#5	Lei45	fmo-2p::MC; TU3311 #1							#5	Lei45	fmo-2p::MC; TU3311 #1				#14L	Lei55	fmo-2p::MC; JT307 - XA2262 sibling #1
#6	Lei46	fmo-2p::MC; CB5602 #1							#6	Lei46	fmo-2p::MC; CB5602 #1				#15L	Lei56	fmo-2p::MC; JT307 - XA2262 sibling #2
#7	Lei47	fmo-2p::MC; TU3311; CB5602 #2							#7	Lei47	fmo-2p::MC; TU3311; CB5602 #2				#16	Lei57	fmo-2p::MC - XA2262 sibling #1
#8L	Lei48	fmo-2p::MC; JT307; XA2262 #1													#17	Lei58	fmo-2p::MC - XA2262 sibling #2
#9	Lei49	fmo-2p::MC; JT307; XA2262 #2													#18	Lei59	fmo-2p::MC; gcy-33; gcy-36 - XA2262 sibling #1
#10L	Lei50	fmo-2p::MC; JT307; XA2262 #3							#1	N2					#19	Lei60	fmo-2p::MC; gcy-33; gcy-36 - XA2262 sibling #2
#11L	Lei51	fmo-2p::MC; JT307; gcy-31; gcy-36 - XA2262 sibling #1							#8L	Lei48	fmo-2p::MC; JT307; XA2262 #1
#12L	Lei52	fmo-2p::MC; JT307; gcy-33; gcy-36 - XA2262 sibling #1							#9	Lei49	fmo-2p::MC; JT307; XA2262 #2
#13	Lei53	fmo-2p::MC; JT307; gcy-33; gcy-36 - XA2262 sibling #2							#10L	Lei50	fmo-2p::MC; JT307; XA2262 #3
#14L	Lei55	fmo-2p::MC; JT307 - XA2262 sibling #1							#14L	Lei55	fmo-2p::MC; JT307 - XA2262 sibling #1
#15L	Lei56	fmo-2p::MC; JT307 - XA2262 sibling #2							#15L	Lei56	fmo-2p::MC; JT307 - XA2262 sibling #2
#16	Lei57	fmo-2p::MC - XA2262 sibling #1							#16	Lei57	fmo-2p::MC - XA2262 sibling #1
#17	Lei58	fmo-2p::MC - XA2262 sibling #2							#17	Lei58	fmo-2p::MC - XA2262 sibling #2
#18	Lei59	fmo-2p::MC; gcy-33; gcy-36 - XA2262 sibling #1							#20	Lei61	fmo-2p::MC; XA2262 #1
#19	Lei60	fmo-2p::MC; gcy-33; gcy-36 - XA2262 sibling #2							#21	Lei62	fmo-2p::MC; XA2262 #2
#20	Lei61	fmo-2p::MC; XA2262 #1
#21	Lei62	fmo-2p::MC; XA2262 #2
