# Supplementary material for: fmo-4 promotes longevity and stress resistance via ER to mitochondria calcium regulation in C. elegans
Source: eLife journal article supplement (doi:10.7554/elife.99971), 2024-08-27
Supplement: fig5-data3 [file 2.12.2024 50uM Carbachol 50uM EDTA Water second replicate.xlsx]

## Sheet: lifespan
strain	day	alive	dead-total	dead-normal	dead-ruptured	censored	ratio-alive	percentage-alive
N2 water	0	77	0				1	100
N2 water	5	77	0				1	100
N2 water	7	77	0				1	100						1	2	3	4	5	6	7	8	9	10	11	12	13	14	15
N2 water	10	77	0	0			1	100			plot data here-->		day	WT; Water	FMO-4 OE; Water	FMO-4 KO; Water	WT; 50uM Carbachol	FMO-4 OE; 50uM Carbachol	FMO-4 KO; 50uM Carbachol	WT; 50uM EDTA	FMO-4 OE; 50uM EDTA	FMO-4 KO; 50uM EDTA
N2 water	13	74	3	3			0.961039	96.1039				0	0	100	100	100	100	100	100	100	100	100
N2 water	15	70	7	4			0.909091	90.9091				5	5	100	100	100	100	100	100	100	100	100
N2 water	17	63	14	7			0.818182	81.8182				7	7	100	100	100	100	100	100	100	100	100
N2 water	20	50	27	13			0.649351	64.9351				10	10	100	100	100	100	100	100	100	100	100
N2 water	22	41	36	9			0.532468	53.2468				13	13	96.1039	100	96.5812	100	100	94.6429	100	100	95.9596
N2 water	24	28	49	13			0.363636	36.3636				15	15	90.9091	98.1982	93.1624	98.9362	96.8421	79.4643	97.8495	96.6667	81.8182
N2 water	27	11	66	17			0.142857	14.2857				17	17	81.8182	94.5946	85.4701	91.4894	91.5789	59.8214	94.6237	92.2222	51.5152
N2 water	29	8	69	3			0.103896	10.3896				20	20	64.9351	88.2883	66.6667	87.234	86.3158	36.6071	84.9462	83.3333	28.2828
N2 water	31	3	74	5			0.038961	3.8961				22	22	53.2468	82.8829	41.0256	80.8511	80	26.7857	76.3441	75.5556	9.09091
N2 water	34	1	76	2			0.012987	1.2987				24	24	36.3636	74.7748	20.5128	74.4681	71.5789	7.14286	68.8172	65.5556	0
N2 water	36	0	77	1			0	0				27	27	14.2857	63.0631	5.12821	58.5106	57.8947	0	54.8387	53.3333
N2 water	38	0	77				0	0				29	29	10.3896	45.9459	0	40.4255	43.1579		25.8065	31.1111
N2 water	41	0	77				0	0				31	31	3.8961	22.5225		17.0213	27.3684		18.2796	16.6667
N2 water	43	0	77				0	0				34	34	1.2987	12.6126		8.51064	16.8421		9.67742	7.77778
N2 water	45	0	77				0	0				36	36	0	7.20721		5.31915	11.5789		5.37634	4.44444
												38	38		0		0	1.05263		0	1.11111
4OE water	0	111	0				1	100				41	41					0			0
4OE water	5	111	0				1	100				43	43
4OE water	7	111	0				1	100				45	45
4OE water	10	111	0	0			1	100
4OE water	12	111	0	0			1	100
4OE water	14	109	2	2			0.981982	98.1982
4OE water	17	105	6	4			0.945946	94.5946
4OE water	19	98	13	7			0.882883	88.2883
4OE water	21	92	19	6			0.828829	82.8829
4OE water	24	83	28	9			0.747748	74.7748
4OE water	26	70	41	13			0.630631	63.0631
4OE water	28	51	60	19			0.459459	45.9459
4OE water	31	25	86	26			0.225225	22.5225
4OE water	33	14	97	11			0.126126	12.6126
4OE water	35	8	103	6			0.0720721	7.20721
4OE water	38	0	111	8			0	0
4OE water	40	0	111				0	0
4OE water	42	0	111				0	0
4OE water	45	0	111				0	0
4KO water	0	117	0				1	100
4KO water	5	117	0				1	100
4KO water	7	117	0				1	100
4KO water	10	117	0	0			1	100
4KO water	12	113	4	4			0.965812	96.5812
4KO water	14	109	8	4			0.931624	93.1624
4KO water	17	100	17	9			0.854701	85.4701
4KO water	19	78	39	22			0.666667	66.6667
4KO water	21	48	69	30			0.410256	41.0256
4KO water	24	24	93	24			0.205128	20.5128
4KO water	26	6	111	18			0.0512821	5.12821
4KO water	28	0	117	6			0	0
4KO water	31	0	117				0	0
4KO water	33	0	117				0	0
4KO water	35	0	117				0	0
4KO water	38	0	117				0	0
4KO water	40	0	117				0	0
4KO water	42	0	117				0	0
4KO water	45	0	117				0	0
WT carb	0	94	0				1	100
WT carb	5	94	0				1	100
WT carb	7	94	0				1	100
WT carb	10	94	0	0			1	100
WT carb	12	94	0	0			1	100
WT carb	14	93	1	1			0.989362	98.9362
WT carb	17	86	8	7			0.914894	91.4894
WT carb	19	82	12	4			0.87234	87.234
WT carb	21	76	18	6			0.808511	80.8511
WT carb	24	70	24	6			0.744681	74.4681
WT carb	26	55	39	15			0.585106	58.5106
WT carb	28	38	56	17			0.404255	40.4255
WT carb	31	16	78	22			0.170213	17.0213
WT carb	33	8	86	8			0.0851064	8.51064
WT carb	35	5	89	3			0.0531915	5.31915
WT carb	38	0	94	5			0	0
WT carb	40	0	94				0	0
WT carb	42	0	94				0	0
WT carb	45	0	94				0	0
4OE carb	0	95	0				1	100
4OE carb	5	95	0				1	100
4OE carb	7	95	0				1	100
4OE carb	10	95	0	0			1	100
4OE carb	12	95	0	0			1	100
4OE carb	14	92	3	3			0.968421	96.8421
4OE carb	17	87	8	5			0.915789	91.5789
4OE carb	19	82	13	5			0.863158	86.3158
4OE carb	21	76	19	6			0.8	80
4OE carb	24	68	27	8			0.715789	71.5789
4OE carb	26	55	40	13			0.578947	57.8947
4OE carb	28	41	54	14			0.431579	43.1579
4OE carb	31	26	69	15			0.273684	27.3684
4OE carb	33	16	79	10			0.168421	16.8421
4OE carb	35	11	84	5			0.115789	11.5789
4OE carb	38	1	94	10			0.0105263	1.05263
4OE carb	40	0	95	1			0	0
4OE carb	42	0	95				0	0
4OE carb	45	0	95				0	0
4KO carb	0	112	0				1	100
4KO carb	5	112	0				1	100
4KO carb	7	112	0				1	100
4KO carb	10	112	0	0			1	100
4KO carb	12	106	6	6			0.946429	94.6429
4KO carb	14	89	23	17			0.794643	79.4643
4KO carb	17	67	45	22			0.598214	59.8214
4KO carb	19	41	71	26			0.366071	36.6071
4KO carb	21	30	82	11			0.267857	26.7857
4KO carb	24	8	104	22			0.0714286	7.14286
4KO carb	26	0	112	8			0	0
4KO carb	28	0	112				0	0
4KO carb	31	0	112				0	0
4KO carb	33	0	112				0	0
4KO carb	35	0	112				0	0
4KO carb	38	0	112				0	0
4KO carb	40	0	112				0	0
4KO carb	42	0	112				0	0
4KO carb	45	0	112				0	0
WT edta	0	93	0				1	100
WT edta	5	93	0				1	100
WT edta	7	93	0				1	100
WT edta	10	93	0	0			1	100
WT edta	12	93	0	0			1	100
WT edta	14	91	2	2			0.978495	97.8495
WT edta	17	88	5	3			0.946237	94.6237
WT edta	19	79	14	9			0.849462	84.9462
WT edta	21	71	22	8			0.763441	76.3441
WT edta	24	64	29	7			0.688172	68.8172
WT edta	26	51	42	13			0.548387	54.8387
WT edta	28	24	69	27			0.258065	25.8065
WT edta	31	17	76	7			0.182796	18.2796
WT edta	33	9	84	8			0.0967742	9.67742
WT edta	35	5	88	4			0.0537634	5.37634
WT edta	38	0	93	5			0	0
WT edta	40	0	93				0	0
WT edta	42	0	93				0	0
WT edta	45	0	93				0	0
4OE edta	0	90	0				1	100
4OE edta	5	90	0				1	100
4OE edta	7	90	0				1	100
4OE edta	10	90	0	0			1	100
4OE edta	12	90	0	0			1	100
4OE edta	14	87	3	3			0.966667	96.6667
4OE edta	17	83	7	4			0.922222	92.2222
4OE edta	19	75	15	8			0.833333	83.3333
4OE edta	21	68	22	7			0.755556	75.5556
4OE edta	24	59	31	9			0.655556	65.5556
4OE edta	26	48	42	11			0.533333	53.3333
4OE edta	28	28	62	20			0.311111	31.1111
4OE edta	31	15	75	13			0.166667	16.6667
4OE edta	33	7	83	8			0.0777778	7.77778
4OE edta	35	4	86	3			0.0444444	4.44444
4OE edta	38	1	89	3			0.0111111	1.11111
4OE edta	40	0	90	1			0	0
4OE edta	42	0	90				0	0
4OE edta	45
4KO edta	0	99	0				1	100
4KO edta	5	99	0				1	100
4KO edta	7	99	0				1	100
4KO edta	10	99	0	0			1	100
4KO edta	12	95	4	4			0.959596	95.9596
4KO edta	14	81	18	14			0.818182	81.8182
4KO edta	17	51	48	30			0.515152	51.5152
4KO edta	19	28	71	23			0.282828	28.2828
4KO edta	21	9	90	19			0.0909091	9.09091
4KO edta	24	0	99	9			0	0
4KO edta	26	0	99				0	0
4KO edta	28	0	99				0	0
4KO edta	31	0	99				0	0
4KO edta	33	0	99				0	0
4KO edta	35	0	99				0	0
4KO edta	38	0	99				0	0
4KO edta	40	0	99				0	0
4KO edta	42	0	99				0	0
4KO edta	45	0	99				0	0
4KO edta	47	0	99				0	0
4KO itr1	5	0	0				#DIV/0!	#DIV/0!
4KO itr1	7	0	0				#DIV/0!	#DIV/0!
4KO itr1	10	0	0				#DIV/0!	#DIV/0!
4KO itr1	12	0	0				#DIV/0!	#DIV/0!
4KO itr1	14	0	0				#DIV/0!	#DIV/0!
4KO itr1	17	0	0				#DIV/0!	#DIV/0!
4KO itr1	19	0	0				#DIV/0!	#DIV/0!
4KO itr1	21	0	0				#DIV/0!	#DIV/0!
4KO itr1	24	0	0				#DIV/0!	#DIV/0!
4KO itr1	26	0	0				#DIV/0!	#DIV/0!
4KO itr1	28	0	0				#DIV/0!	#DIV/0!
4KO itr1	31	0	0				#DIV/0!	#DIV/0!
4KO itr1	33	0	0				#DIV/0!	#DIV/0!
4KO itr1	35	0	0				#DIV/0!	#DIV/0!
4KO itr1	38	0	0				#DIV/0!	#DIV/0!
4KO itr1	40	0	0				#DIV/0!	#DIV/0!
4KO itr1	42	0	0				#DIV/0!	#DIV/0!
4KO itr1	45
WT scl5	0	120	0				1	100
WT scl5	5	120	0				1	100
WT scl5	7	120	0				1	100
WT scl5	10	120	0				1	100
WT scl5	12	120	0				1	100
WT scl5	14	120	0				1	100
WT scl5	17	120	0				1	100
WT scl5	19	120	0				1	100
WT scl5	21	120	0				1	100
WT scl5	24	120	0				1	100
WT scl5	26	120	0				1	100
WT scl5	28	120	0				1	100
WT scl5	31	120	0				1	100
WT scl5	33	120	0				1	100
WT scl5	35	120	0				1	100
WT scl5	38	120	0				1	100
WT scl5	40	120	0				1	100
WT scl5	42	120	0				1	100
WT scl5	45	120	0				1	100
4OE scl5	0	117	0				1	100
4OE scl5	5	117	0				1	100
4OE scl5	7	117	0				1	100
4OE scl5	10	117	0				1	100
4OE scl5	12	117	0				1	100
4OE scl5	14	117	0				1	100
4OE scl5	17	117	0				1	100
4OE scl5	19	117	0				1	100
4OE scl5	21	117	0				1	100
4OE scl5	24	117	0				1	100
4OE scl5	26	117	0				1	100
4OE scl5	28	117	0				1	100
4OE scl5	31	117	0				1	100
4OE scl5	33	117	0				1	100
4OE scl5	35	117	0				1	100
4OE scl5	38	117	0				1	100
4OE scl5	40	117	0				1	100
4OE scl5	42	117	0				1	100
4OE scl5	45
4KO scl5	0	104	0				1	100
4KO scl5	5	104	0				1	100
4KO scl5	7	104	0				1	100
4KO scl5	10	104	0				1	100
4KO scl5	12	104	0				1	100
4KO scl5	14	104	0				1	100
4KO scl5	17	104	0				1	100
4KO scl5	19	104	0				1	100
4KO scl5	21	104	0				1	100
4KO scl5	24	104	0				1	100
4KO scl5	26	104	0				1	100
4KO scl5	28	104	0				1	100
4KO scl5	31	104	0				1	100
4KO scl5	33	104	0				1	100
4KO scl5	35	104	0				1	100
4KO scl5	38	104	0				1	100
4KO scl5	40	104	0				1	100
4KO scl5	42	104	0				1	100
4KO scl5	45
WT 50-50	0	123	0			0	1	100
WT 50-50	5	123	0			0	1	100
WT 50-50	7	123	0			0	1	100
WT 50-50	10	123	0			0	1	100
WT 50-50	12	123	0			0	1	100
WT 50-50	14	123	0			0	1	100
WT 50-50	17	123	0			0	1	100
WT 50-50	19	123	0			0	1	100
WT 50-50	21	123	0			0	1	100
WT 50-50	24	123	0			0	1	100
WT 50-50	26	123	0			0	1	100
WT 50-50	28	123	0			0	1	100
WT 50-50	31	123	0			0	1	100
WT 50-50	33	123	0			0	1	100
WT 50-50	35	123	0			0	1	100
WT 50-50	38	123	0			0	1	100
WT 50-50	40	123	0			0	1	100
WT 50-50	42	123	0			0	1	100
WT 50-50	45	123	0			0	1	100
4OE 50-50	0	117	0			0	1	100
4OE 50-50	5	117	0			0	1	100
4OE 50-50	7	117	0			0	1	100
4OE 50-50	10	117	0			0	1	100
4OE 50-50	12	117	0			0	1	100
4OE 50-50	14	117	0			0	1	100
4OE 50-50	17	117	0			0	1	100
4OE 50-50	19	117	0			0	1	100
4OE 50-50	21	117	0			0	1	100
4OE 50-50	24	117	0			0	1	100
4OE 50-50	26	117	0			0	1	100
4OE 50-50	28	117	0			0	1	100
4OE 50-50	31	117	0			0	1	100
4OE 50-50	33	117	0			0	1	100
4OE 50-50	35	117	0			0	1	100
4OE 50-50	38	117	0			0	1	100
4OE 50-50	40	117	0			0	1	100
4OE 50-50	42	117	0			0	1	100
4OE 50-50	45	117	0			0	1	100
		117
4KO 5050	0	114	0				1	100
4KO 5050	5	114	0				1	100
4KO 5050	7	114	0				1	100
4KO 5050	10	114	0				1	100
4KO 5050	12	114	0				1	100
4KO 5050	14	114	0				1	100
4KO 5050	17	114	0				1	100
4KO 5050	19	114	0				1	100
4KO 5050	21	114	0				1	100
4KO 5050	24	114	0				1	100
4KO 5050	26	114	0				1	100
4KO 5050	28	114	0				1	100
4KO 5050	31	114	0				1	100
4KO 5050	33	114	0				1	100
4KO 5050	35	114	0				1	100
4KO 5050	38	114	0				1	100
4KO 5050	40	114	0				1	100
4KO 5050	42	114	0				1	100
4KO 5050	45	114	0				1	100
							0

## Sheet: stats carbachol
% WT water [77]					condition	chi	pvalue	corrected_pvalue
#days	dead	censored			WT water v.s. fmo-4 OE water	44.74	0	0
0					WT water v.s. WT fmo-4 KO water	6.37	0.0116	0.0581
5					WT water v.s. WT carbachol	33.57	6.8e-09	3.4e-08
7					WT water v.s. fmo-4 OE carbachol	37.22	0	0
10	0				WT water v.s. fmo-4 KO carbachol	28.23	1.1e-07	5.4e-07
13	3				fmo-4 OE water v.s. WT water	44.74	0	0
15	4				fmo-4 OE water v.s. WT fmo-4 KO water	102.12	0	0
17	7				fmo-4 OE water v.s. WT carbachol	0.91	0.3396	1
20	13				fmo-4 OE water v.s. fmo-4 OE carbachol	0.18	0.671	1
22	9				fmo-4 OE water v.s. fmo-4 KO carbachol	138.57	0	0
24	13				WT fmo-4 KO water v.s. WT water	6.37	0.0116	0.0581
27	17				WT fmo-4 KO water v.s. fmo-4 OE water	102.12	0	0
29	3				WT fmo-4 KO water v.s. WT carbachol	83.88	0	0
31	5				WT fmo-4 KO water v.s. fmo-4 OE carbachol	81.01	0	0
34	2				WT fmo-4 KO water v.s. fmo-4 KO carbachol	19.3	1.1e-05	0.0001
36	1				WT carbachol v.s. WT water	33.57	6.8e-09	3.4e-08
38					WT carbachol v.s. fmo-4 OE water	0.91	0.3396	1
41					WT carbachol v.s. WT fmo-4 KO water	83.88	0	0
43					WT carbachol v.s. fmo-4 OE carbachol	1.44	0.2305	1
45					WT carbachol v.s. fmo-4 KO carbachol	117.29	0	0
					fmo-4 OE carbachol v.s. WT water	37.22	0	0
% fmo-4 OE water [111]					fmo-4 OE carbachol v.s. fmo-4 OE water	0.18	0.671	1
#days	dead	censored			fmo-4 OE carbachol v.s. WT fmo-4 KO water	81.01	0	0
0					fmo-4 OE carbachol v.s. WT carbachol	1.44	0.2305	1
5					fmo-4 OE carbachol v.s. fmo-4 KO carbachol	112.33	0	0
7					fmo-4 KO carbachol v.s. WT water	28.23	1.1e-07	5.4e-07
10	0				fmo-4 KO carbachol v.s. fmo-4 OE water	138.57	0	0
13	0				fmo-4 KO carbachol v.s. WT fmo-4 KO water	19.3	1.1e-05	0.0001
15	2				fmo-4 KO carbachol v.s. WT carbachol	117.29	0	0
17	4				fmo-4 KO carbachol v.s. fmo-4 OE carbachol	112.33	0	0
20	7
22	6
24	9
27	13
29	19
31	26
34	11
36	6
38	8
41
43
45
% WT fmo-4 KO water [117]
#days	dead	censored
0
5
7
10	0
13	4
15	4
17	9
20	22
22	30
24	24
27	18
29	6
31
34
36
38
41
43
45
% WT carbachol [94]
#days	dead	censored
0
5
7
10	0
13	0
15	1
17	7
20	4
22	6
24	6
27	15
29	17
31	22
34	8
36	3
38	5
41
43
45
% fmo-4 OE carbachol [95]
#days	dead	censored
0
5
7
10	0
13	0
15	3
17	5
20	5
22	6
24	8
27	13
29	14
31	15
34	10
36	5
38	10
41	1
43
45
% fmo-4 KO carbachol [112]
#days	dead	censored
0
5
7
10	0
13	6
15	17
17	22
20	26
22	11
24	22
27	8
29
31
34
36
38
41
43
45

## Sheet: stats edta
% WT water [77]					condition	chi	pvalue	corrected_pvalue
#days	dead	censored			WT water v.s. fmo-4 OE water	44.74	0	0
0					WT water v.s. WT fmo-4 KO water	6.37	0.0116	0.0581
5					WT water v.s. WT edta	26.74	2.3e-07	1.2e-06
7					WT water v.s. fmo-4 OE edta	22.99	1.6e-06	8.1e-06
10	0				WT water v.s. fmo-4 KO edta	49.3	0	0
13	3				fmo-4 OE water v.s. WT water	44.74	0	0
15	4				fmo-4 OE water v.s. WT fmo-4 KO water	102.12	0	0
17	7				fmo-4 OE water v.s. WT edta	2.76	0.0967	0.4836
20	13				fmo-4 OE water v.s. fmo-4 OE edta	2.94	0.0867	0.4334
22	9				fmo-4 OE water v.s. fmo-4 KO edta	157.21	0	0
24	13				WT fmo-4 KO water v.s. WT water	6.37	0.0116	0.0581
27	17				WT fmo-4 KO water v.s. fmo-4 OE water	102.12	0	0
29	3				WT fmo-4 KO water v.s. WT edta	68.18	0	0
31	5				WT fmo-4 KO water v.s. fmo-4 OE edta	62.82	0	0
34	2				WT fmo-4 KO water v.s. fmo-4 KO edta	49.59	0	0
36	1				WT edta v.s. WT water	26.74	2.3e-07	1.2e-06
38					WT edta v.s. fmo-4 OE water	2.76	0.0967	0.4836
41					WT edta v.s. WT fmo-4 KO water	68.18	0	0
43					WT edta v.s. fmo-4 OE edta	0.01	0.9219	1
45					WT edta v.s. fmo-4 KO edta	124.34	0	0
					fmo-4 OE edta v.s. WT water	22.99	1.6e-06	8.1e-06
% fmo-4 OE water [111]					fmo-4 OE edta v.s. fmo-4 OE water	2.94	0.0867	0.4334
#days	dead	censored			fmo-4 OE edta v.s. WT fmo-4 KO water	62.82	0	0
0					fmo-4 OE edta v.s. WT edta	0.01	0.9219	1
5					fmo-4 OE edta v.s. fmo-4 KO edta	113.95	0	0
7					fmo-4 KO edta v.s. WT water	49.3	0	0
10	0				fmo-4 KO edta v.s. fmo-4 OE water	157.21	0	0
13	0				fmo-4 KO edta v.s. WT fmo-4 KO water	49.59	0	0
15	2				fmo-4 KO edta v.s. WT edta	124.34	0	0
17	4				fmo-4 KO edta v.s. fmo-4 OE edta	113.95	0	0
20	7
22	6
24	9
27	13
29	19
31	26
34	11
36	6
38	8
41
43
45
% WT fmo-4 KO water [117]
#days	dead	censored
0
5
7
10	0
13	4
15	4
17	9
20	22
22	30
24	24
27	18
29	6
31
34
36
38
41
43
45
% WT edta [93]
#days	dead	censored
0
5
7
10	0
13	0
15	2
17	3
20	9
22	8
24	7
27	13
29	27
31	7
34	8
36	4
38	5
41
43
45
% fmo-4 OE edta [90]
#days	dead	censored
0
5
7
10	0
13	0
15	3
17	4
20	8
22	7
24	9
27	11
29	20
31	13
34	8
36	3
38	3
41	1
43
45
% fmo-4 KO edta [99]
#days	dead	censored
0
5
7
10	0
13	4
15	14
17	30
20	23
22	19
24	9
27
29
31
34
36
38
41
43
45

## Sheet: stats atf-4
% WT EV [119]								condition	chi	pvalue	corrected_pvalue
#days	dead	censored						WT EV v.s. WT atf4	12.96	0.0003	0.0029	****
0								WT EV v.s. C9 atf4	42.64	0	0	****
5								WT EV v.s. fmo2 atf4	0.68	0.4106	1	NS
7								WT EV v.s. 4OE atf4	39.94	0	0	****
9	0							WT EV v.s. 4KO atf4	0.12	0.7286	1	NS
13	1							WT EV v.s. fmo-2 OE EV	49.67	0	0	****
15	4							WT EV v.s. fmo-4 OE EV	53.7	0	0	****
17	7							WT EV v.s. fmo-4 KO EV	2.67	0.1022	0.9196
20	13							WT EV v.s. fmo-2 KO EV	0.01	0.9183	1
22	12							WT atf4 v.s. WT EV	12.96	0.0003	0.0029
24	31							WT atf4 v.s. C9 atf4	19.14	1.2e-05	0.0001
27	34							WT atf4 v.s. fmo2 atf4	17.05	3.6e-05	0.0003
29	9							WT atf4 v.s. 4OE atf4	10.92	0.001	0.0086
31	8							WT atf4 v.s. 4KO atf4	9.11	0.0025	0.0228
34								WT atf4 v.s. fmo-2 OE EV	22.68	1.9e-06	1.7e-05
36								WT atf4 v.s. fmo-4 OE EV	27.03	2e-07	1.8e-06
38								WT atf4 v.s. fmo-4 KO EV	25.49	4.4e-07	4e-06
41								WT atf4 v.s. fmo-2 KO EV	10.21	0.0014	0.0126
43								C9 atf4 v.s. WT EV	42.64	0	0
45								C9 atf4 v.s. WT atf4	19.14	1.2e-05	0.0001
								C9 atf4 v.s. fmo2 atf4	40.62	0	0
% WT atf4 [115]								C9 atf4 v.s. 4OE atf4	3.01	0.0826	0.7435
#days	dead	censored						C9 atf4 v.s. 4KO atf4	34.45	4.4e-09	3.9e-08
0								C9 atf4 v.s. fmo-2 OE EV	0.39	0.5315	1
5								C9 atf4 v.s. fmo-4 OE EV	0.64	0.4252	1
7								C9 atf4 v.s. fmo-4 KO EV	53.23	0	0
9	0							C9 atf4 v.s. fmo-2 KO EV	36.3	0	0
13	1							fmo2 atf4 v.s. WT EV	0.68	0.4106	1
15	4							fmo2 atf4 v.s. WT atf4	17.05	3.6e-05	0.0003
17	1							fmo2 atf4 v.s. C9 atf4	40.62	0	0
20	5							fmo2 atf4 v.s. 4OE atf4	40.58	0	0
22	8							fmo2 atf4 v.s. 4KO atf4	0.14	0.7086	1
24	26							fmo2 atf4 v.s. fmo-2 OE EV	46.4	0	0
27	24							fmo2 atf4 v.s. fmo-4 OE EV	49.75	0	0
29	36							fmo2 atf4 v.s. fmo-4 KO EV	0.53	0.4661	1
31	10							fmo2 atf4 v.s. fmo-2 KO EV	0.42	0.5179	1
34								4OE atf4 v.s. WT EV	39.94	0	0
36								4OE atf4 v.s. WT atf4	10.92	0.001	0.0086
38								4OE atf4 v.s. C9 atf4	3.01	0.0826	0.7435
41								4OE atf4 v.s. fmo2 atf4	40.58	0	0
43								4OE atf4 v.s. 4KO atf4	29.87	4.6e-08	4.2e-07
45								4OE atf4 v.s. fmo-2 OE EV	4.87	0.0274	0.2463
								4OE atf4 v.s. fmo-4 OE EV	6.53	0.0106	0.0952
								4OE atf4 v.s. fmo-4 KO EV	53.4	0	0
% C9 atf4 [109]								4OE atf4 v.s. fmo-2 KO EV	31	2.6e-08	2.3e-07
#days	dead	censored						4KO atf4 v.s. WT EV	0.12	0.7286	1
0								4KO atf4 v.s. WT atf4	9.11	0.0025	0.0228
5								4KO atf4 v.s. C9 atf4	34.45	4.4e-09	3.9e-08
7								4KO atf4 v.s. fmo2 atf4	0.14	0.7086	1
9	0							4KO atf4 v.s. 4OE atf4	29.87	4.6e-08	4.2e-07
13	0							4KO atf4 v.s. fmo-2 OE EV	39.7	0	0
15	3							4KO atf4 v.s. fmo-4 OE EV	43.09	0	0
17	5							4KO atf4 v.s. fmo-4 KO EV	1.11	0.2925	1
20	5							4KO atf4 v.s. fmo-2 KO EV	0.01	0.9399	1
22	7							fmo-2 OE EV v.s. WT EV	49.67	0	0
24	14							fmo-2 OE EV v.s. WT atf4	22.68	1.9e-06	1.7e-05
27	12							fmo-2 OE EV v.s. C9 atf4	0.39	0.5315	1
29	25							fmo-2 OE EV v.s. fmo2 atf4	46.4	0	0
31	19							fmo-2 OE EV v.s. 4OE atf4	4.87	0.0274	0.2463
34	10							fmo-2 OE EV v.s. 4KO atf4	39.7	0	0
36	7							fmo-2 OE EV v.s. fmo-4 OE EV	0.01	0.9312	1
38	2							fmo-2 OE EV v.s. fmo-4 KO EV	59.81	0	0
41								fmo-2 OE EV v.s. fmo-2 KO EV	40.57	0	0
43								fmo-4 OE EV v.s. WT EV	53.7	0	0
45								fmo-4 OE EV v.s. WT atf4	27.03	2e-07	1.8e-06
								fmo-4 OE EV v.s. C9 atf4	0.64	0.4252	1
								fmo-4 OE EV v.s. fmo2 atf4	49.75	0	0
								fmo-4 OE EV v.s. 4OE atf4	6.53	0.0106	0.0952
% fmo2 atf4 [77]								fmo-4 OE EV v.s. 4KO atf4	43.09	0	0
#days	dead	censored						fmo-4 OE EV v.s. fmo-2 OE EV	0.01	0.9312	1
0								fmo-4 OE EV v.s. fmo-4 KO EV	64.02	0	0
5								fmo-4 OE EV v.s. fmo-2 KO EV	44.86	0	0
7								fmo-4 KO EV v.s. WT EV	2.67	0.1022	0.9196
9	0							fmo-4 KO EV v.s. WT atf4	25.49	4.4e-07	4e-06
13	0							fmo-4 KO EV v.s. C9 atf4	53.23	0	0
15	7							fmo-4 KO EV v.s. fmo2 atf4	0.53	0.4661	1
17	2							fmo-4 KO EV v.s. 4OE atf4	53.4	0	0
20	5							fmo-4 KO EV v.s. 4KO atf4	1.11	0.2925	1
22	10							fmo-4 KO EV v.s. fmo-2 OE EV	59.81	0	0
24	26							fmo-4 KO EV v.s. fmo-4 OE EV	64.02	0	0
27	16							fmo-4 KO EV v.s. fmo-2 KO EV	1.89	0.1691	1
29	9							fmo-2 KO EV v.s. WT EV	0.01	0.9183	1
31	2							fmo-2 KO EV v.s. WT atf4	10.21	0.0014	0.0126
34								fmo-2 KO EV v.s. C9 atf4	36.3	0	0
36								fmo-2 KO EV v.s. fmo2 atf4	0.42	0.5179	1	NS
38								fmo-2 KO EV v.s. 4OE atf4	31	2.6e-08	2.3e-07
41								fmo-2 KO EV v.s. 4KO atf4	0.01	0.9399	1
43								fmo-2 KO EV v.s. fmo-2 OE EV	40.57	0	0
45								fmo-2 KO EV v.s. fmo-4 OE EV	44.86	0	0
								fmo-2 KO EV v.s. fmo-4 KO EV	1.89	0.1691	1
% 4OE atf4 [121]
#days	dead	censored
0
5
7
9	0
13	0
15	4
17	1
20	4
22	7
24	14
27	29
29	35
31	15
34	9
36	3
38
41
43
45
% 4KO atf4 [82]
#days	dead	censored
0
5
7
9	0
13	7
15	6
17	5
20	12
22	5
24	15
27	14
29	10
31	8
34
36
38
41
43
45
% fmo-2 OE EV [112]
#days	dead	censored
0
5
7
9	0
13	1
15	1
17	4
20	6
22	6
24	11
27	19
29	25
31	15
34	14
36	6
38	2
41	0
43	2
45
% fmo-4 OE EV [117]
#days	dead	censored
0
5
7
9	0
13	2
15	2
17	4
20	5
22	6
24	13
27	14
29	26
31	19
34	17
36	4
38	5
41
43
45
% fmo-4 KO EV [100]
#days	dead	censored
0
5
7
9	0
13	4
15	7
17	5
20	13
22	10
24	27
27	21
29	11
31	2
34
36
38
41
43
45
% fmo-2 KO EV [86]
#days	dead	censored
0
5
7
9	0
13	3
15	5
17	9
20	8
22	10
24	14
27	15
29	19
31	3
34
36
38
41
43
45

## Sheet: Sheet1
#1	N2								#1	N2					#1	N2
#2	Lei42	fmo-2p::MC; unc-119p::HIF-1(P621A); JT307 #1							#2	Lei42	fmo-2p::MC; unc-119p::HIF-1(P621A); JT307 #1				#11L	Lei51	fmo-2p::MC; JT307; gcy-31; gcy-36 - XA2262 sibling #1
#3	Lei43	fmo-2p::MC; unc-119p::HIF-1(P621A); JT307 #2							#3	Lei43	fmo-2p::MC; unc-119p::HIF-1(P621A); JT307 #2				#12L	Lei52	fmo-2p::MC; JT307; gcy-33; gcy-36 - XA2262 sibling #1
#4	Lei44	fmo-2p::MC; TU3311; CB5602 #1							#4	Lei44	fmo-2p::MC; TU3311; CB5602 #1				#13	Lei53	fmo-2p::MC; JT307; gcy-33; gcy-36 - XA2262 sibling #2
#5	Lei45	fmo-2p::MC; TU3311 #1							#5	Lei45	fmo-2p::MC; TU3311 #1				#14L	Lei55	fmo-2p::MC; JT307 - XA2262 sibling #1
#6	Lei46	fmo-2p::MC; CB5602 #1							#6	Lei46	fmo-2p::MC; CB5602 #1				#15L	Lei56	fmo-2p::MC; JT307 - XA2262 sibling #2
#7	Lei47	fmo-2p::MC; TU3311; CB5602 #2							#7	Lei47	fmo-2p::MC; TU3311; CB5602 #2				#16	Lei57	fmo-2p::MC - XA2262 sibling #1
#8L	Lei48	fmo-2p::MC; JT307; XA2262 #1													#17	Lei58	fmo-2p::MC - XA2262 sibling #2
#9	Lei49	fmo-2p::MC; JT307; XA2262 #2													#18	Lei59	fmo-2p::MC; gcy-33; gcy-36 - XA2262 sibling #1
#10L	Lei50	fmo-2p::MC; JT307; XA2262 #3							#1	N2					#19	Lei60	fmo-2p::MC; gcy-33; gcy-36 - XA2262 sibling #2
#11L	Lei51	fmo-2p::MC; JT307; gcy-31; gcy-36 - XA2262 sibling #1							#8L	Lei48	fmo-2p::MC; JT307; XA2262 #1
#12L	Lei52	fmo-2p::MC; JT307; gcy-33; gcy-36 - XA2262 sibling #1							#9	Lei49	fmo-2p::MC; JT307; XA2262 #2
#13	Lei53	fmo-2p::MC; JT307; gcy-33; gcy-36 - XA2262 sibling #2							#10L	Lei50	fmo-2p::MC; JT307; XA2262 #3
#14L	Lei55	fmo-2p::MC; JT307 - XA2262 sibling #1							#14L	Lei55	fmo-2p::MC; JT307 - XA2262 sibling #1
#15L	Lei56	fmo-2p::MC; JT307 - XA2262 sibling #2							#15L	Lei56	fmo-2p::MC; JT307 - XA2262 sibling #2
#16	Lei57	fmo-2p::MC - XA2262 sibling #1							#16	Lei57	fmo-2p::MC - XA2262 sibling #1
#17	Lei58	fmo-2p::MC - XA2262 sibling #2							#17	Lei58	fmo-2p::MC - XA2262 sibling #2
#18	Lei59	fmo-2p::MC; gcy-33; gcy-36 - XA2262 sibling #1							#20	Lei61	fmo-2p::MC; XA2262 #1
#19	Lei60	fmo-2p::MC; gcy-33; gcy-36 - XA2262 sibling #2							#21	Lei62	fmo-2p::MC; XA2262 #2
#20	Lei61	fmo-2p::MC; XA2262 #1
#21	Lei62	fmo-2p::MC; XA2262 #2
