# Supplementary material for: fmo-4 promotes longevity and stress resistance via ER to mitochondria calcium regulation in C. elegans
Source: eLife journal article supplement (doi:10.7554/elife.99971), 2024-08-27
Supplement: fig5-data3 [file elife-99971-fig5-data3-v1.zip]

## Sheet: lifespan
strain	day	alive	dead-total	dead-normal	dead-ruptured	censored	ratio-alive	percentage-alive
N2 water	0	110	0				1	100
N2 water	5	110	0				1	100
N2 water	7	110	0				1	100						1	2	3	4	5	6	7	8	9	10	11	12	13	14	15
N2 water	10	110	0	0			1	100			plot data here-->		day	WT; Water	FMO-4 OE; Water	FMO-4 KO; Water	WT; 50uM Carbachol	FMO-4 OE; 50uM Carbachol	FMO-4 KO; 50uM Carbachol	WT; 50uM EDTA	FMO-4 OE; 50uM EDTA	FMO-4 KO; 50uM EDTA
N2 water	13	107	3	3			0.972727	97.2727				0	0	100	100	100	100	100	100	100	100	100
N2 water	15	96	14	11			0.872727	87.2727				5	5	100	100	100	100	100	100	100	100	100
N2 water	17	83	27	13			0.754545	75.4545				7	7	100	100	100	100	100	100	100	100	100
N2 water	20	69	41	14			0.627273	62.7273				10	10	100	100	100	100	100	100	100	100	100
N2 water	22	48	62	21			0.436364	43.6364				13	13	97.2727	100	96.1165	100	100	96.5035	100	100	96.6667
N2 water	24	27	83	21			0.245455	24.5455				15	15	87.2727	98.5185	85.4369	99.1525	99.2537	88.8112	99.2593	99.1667	87.5
N2 water	27	18	92	9			0.163636	16.3636				17	17	75.4545	95.5556	71.8447	97.4576	96.2687	77.6224	96.2963	95	77.5
N2 water	29	11	99	7			0.1	10				20	20	62.7273	91.1111	53.3981	91.5254	91.0448	54.5455	89.6296	89.1667	50.8333
N2 water	31	9	101	2			0.0818182	8.18182				22	22	43.6364	83.7037	37.8641	83.0508	83.5821	38.4615	80	76.6667	35
N2 water	34	4	106	5			0.0363636	3.63636				24	24	24.5455	74.0741	23.301	63.5593	68.6567	20.2797	61.4815	57.5	16.6667
N2 water	36	0	110	4			0	0				27	27	16.3636	51.1111	14.5631	44.0678	50.7463	6.99301	43.7037	38.3333	7.5
N2 water	38	0	110				0	0				29	29	10	33.3333	7.76699	31.3559	37.3134	2.7972	31.8519	25	0.833333
N2 water	41	0	110				0	0				31	31	8.18182	22.2222	5.82524	22.0339	25.3731	0	20.7407	15.8333	0
N2 water	43	0	110				0	0				34	34	3.63636	14.8148	0	12.7119	17.1642		13.3333	10
N2 water	45	0	110				0	0				36	36	0	8.14815		9.32203	12.6866		8.14815	6.66667
												38	38		4.44444		4.23729	3.73134		2.22222	2.5
4OE water	0	135	0				1	100				41	41		0.740741		1.69492	0.746269		0	0.833333
4OE water	5	135	0				1	100				43	43		0		0.847458	0			0
4OE water	7	135	0				1	100				45	45				0
4OE water	10	135	0	0			1	100
4OE water	12	135	0	0			1	100
4OE water	14	133	2	2			0.985185	98.5185
4OE water	17	129	6	4			0.955556	95.5556
4OE water	19	123	12	6			0.911111	91.1111
4OE water	21	113	22	10			0.837037	83.7037
4OE water	24	100	35	13			0.740741	74.0741
4OE water	26	69	66	31			0.511111	51.1111
4OE water	28	45	90	24			0.333333	33.3333
4OE water	31	30	105	15			0.222222	22.2222
4OE water	33	20	115	10			0.148148	14.8148
4OE water	35	11	124	9			0.0814815	8.14815
4OE water	38	6	129	5			0.0444444	4.44444
4OE water	40	1	134	5			0.00740741	0.740741
4OE water	42	0	135	1			0	0
4OE water	45	0	135				0	0
4KO water	0	103	0				1	100
4KO water	5	103	0				1	100
4KO water	7	103	0				1	100
4KO water	10	103	0	0			1	100
4KO water	12	99	4	4			0.961165	96.1165
4KO water	14	88	15	11			0.854369	85.4369
4KO water	17	74	29	14			0.718447	71.8447
4KO water	19	55	48	19			0.533981	53.3981
4KO water	21	39	64	16			0.378641	37.8641
4KO water	24	24	79	15			0.23301	23.301
4KO water	26	15	88	9			0.145631	14.5631
4KO water	28	8	95	7			0.0776699	7.76699
4KO water	31	6	97	2			0.0582524	5.82524
4KO water	33	0	103	6			0	0
4KO water	35	0	103				0	0
4KO water	38	0	103				0	0
4KO water	40	0	103				0	0
4KO water	42	0	103				0	0
4KO water	45	0	103				0	0
WT carb	0	118	0				1	100
WT carb	5	118	0				1	100
WT carb	7	118	0				1	100
WT carb	10	118	0	0			1	100
WT carb	12	118	0	0			1	100
WT carb	14	117	1	1			0.991525	99.1525
WT carb	17	115	3	2			0.974576	97.4576
WT carb	19	108	10	7			0.915254	91.5254
WT carb	21	98	20	10			0.830508	83.0508
WT carb	24	75	43	23			0.635593	63.5593
WT carb	26	52	66	23			0.440678	44.0678
WT carb	28	37	81	15			0.313559	31.3559
WT carb	31	26	92	11			0.220339	22.0339
WT carb	33	15	103	11			0.127119	12.7119
WT carb	35	11	107	4			0.0932203	9.32203
WT carb	38	5	113	6			0.0423729	4.23729
WT carb	40	2	116	3			0.0169492	1.69492
WT carb	42	1	117	1			0.00847458	0.847458
WT carb	45	0	118	1			0	0
4OE carb	0	134	0				1	100
4OE carb	5	134	0				1	100
4OE carb	7	134	0				1	100
4OE carb	10	134	0	0			1	100
4OE carb	12	134	0	0			1	100
4OE carb	14	133	1	1			0.992537	99.2537
4OE carb	17	129	5	4			0.962687	96.2687
4OE carb	19	122	12	7			0.910448	91.0448
4OE carb	21	112	22	10			0.835821	83.5821
4OE carb	24	92	42	20			0.686567	68.6567
4OE carb	26	68	66	24			0.507463	50.7463
4OE carb	28	50	84	18			0.373134	37.3134
4OE carb	31	34	100	16			0.253731	25.3731
4OE carb	33	23	111	11			0.171642	17.1642
4OE carb	35	17	117	6			0.126866	12.6866
4OE carb	38	5	129	12			0.0373134	3.73134
4OE carb	40	1	133	4			0.00746269	0.746269
4OE carb	42	0	134	1			0	0
4OE carb	45	0	134				0	0
4KO carb	0	143	0				1	100
4KO carb	5	143	0				1	100
4KO carb	7	143	0				1	100
4KO carb	10	143	0	0			1	100
4KO carb	12	138	5	5			0.965035	96.5035
4KO carb	14	127	16	11			0.888112	88.8112
4KO carb	17	111	32	16			0.776224	77.6224
4KO carb	19	78	65	33			0.545455	54.5455
4KO carb	21	55	88	23			0.384615	38.4615
4KO carb	24	29	114	26			0.202797	20.2797
4KO carb	26	10	133	19			0.0699301	6.99301
4KO carb	28	4	139	6			0.027972	2.7972
4KO carb	31	0	143	4			0	0
4KO carb	33	0	143				0	0
4KO carb	35	0	143				0	0
4KO carb	38	0	143				0	0
4KO carb	40	0	143				0	0
4KO carb	42	0	143				0	0
4KO carb	45	0	143				0	0
WT edta	0	135	0				1	100
WT edta	5	135	0				1	100
WT edta	7	135	0				1	100
WT edta	10	135	0	0			1	100
WT edta	12	135	0	0			1	100
WT edta	14	134	1	1			0.992593	99.2593
WT edta	17	130	5	4			0.962963	96.2963
WT edta	19	121	14	9			0.896296	89.6296
WT edta	21	108	27	13			0.8	80
WT edta	24	83	52	25			0.614815	61.4815
WT edta	26	59	76	24			0.437037	43.7037
WT edta	28	43	92	16			0.318519	31.8519
WT edta	31	28	107	15			0.207407	20.7407
WT edta	33	18	117	10			0.133333	13.3333
WT edta	35	11	124	7			0.0814815	8.14815
WT edta	38	3	132	8			0.0222222	2.22222
WT edta	40	0	135	3			0	0
WT edta	42	0	135				0	0
WT edta	45	0	135				0	0
4OE edta	0	120	0				1	100
4OE edta	5	120	0				1	100
4OE edta	7	120	0				1	100
4OE edta	10	120	0	0			1	100
4OE edta	12	120	0	0			1	100
4OE edta	14	119	1	1			0.991667	99.1667
4OE edta	17	114	6	5			0.95	95
4OE edta	19	107	13	7			0.891667	89.1667
4OE edta	21	92	28	15			0.766667	76.6667
4OE edta	24	69	51	23			0.575	57.5
4OE edta	26	46	74	23			0.383333	38.3333
4OE edta	28	30	90	16			0.25	25
4OE edta	31	19	101	11			0.158333	15.8333
4OE edta	33	12	108	7			0.1	10
4OE edta	35	8	112	4			0.0666667	6.66667
4OE edta	38	3	117	5			0.025	2.5
4OE edta	40	1	119	2			0.00833333	0.833333
4OE edta	42	0	120	1			0	0
4OE edta	45
4KO edta	0	120	0				1	100
4KO edta	5	120	0				1	100
4KO edta	7	120	0				1	100
4KO edta	10	120	0	0			1	100
4KO edta	12	116	4	4			0.966667	96.6667
4KO edta	14	105	15	11			0.875	87.5
4KO edta	17	93	27	12			0.775	77.5
4KO edta	19	61	59	32			0.508333	50.8333
4KO edta	21	42	78	19			0.35	35
4KO edta	24	20	100	22			0.166667	16.6667
4KO edta	26	9	111	11			0.075	7.5
4KO edta	28	1	119	8			0.00833333	0.833333
4KO edta	31	0	120	1			0	0
4KO edta	33	0	120				0	0
4KO edta	35	0	120				0	0
4KO edta	38	0	120				0	0
4KO edta	40	0	120				0	0
4KO edta	42	0	120				0	0
4KO edta	45	0	120				0	0
4KO edta	47	0	120				0	0
4KO itr1	5	0	0				#DIV/0!	#DIV/0!
4KO itr1	7	0	0				#DIV/0!	#DIV/0!
4KO itr1	10	0	0				#DIV/0!	#DIV/0!
4KO itr1	12	0	0				#DIV/0!	#DIV/0!
4KO itr1	14	0	0				#DIV/0!	#DIV/0!
4KO itr1	17	0	0				#DIV/0!	#DIV/0!
4KO itr1	19	0	0				#DIV/0!	#DIV/0!
4KO itr1	21	0	0				#DIV/0!	#DIV/0!
4KO itr1	24	0	0				#DIV/0!	#DIV/0!
4KO itr1	26	0	0				#DIV/0!	#DIV/0!
4KO itr1	28	0	0				#DIV/0!	#DIV/0!
4KO itr1	31	0	0				#DIV/0!	#DIV/0!
4KO itr1	33	0	0				#DIV/0!	#DIV/0!
4KO itr1	35	0	0				#DIV/0!	#DIV/0!
4KO itr1	38	0	0				#DIV/0!	#DIV/0!
4KO itr1	40	0	0				#DIV/0!	#DIV/0!
4KO itr1	42	0	0				#DIV/0!	#DIV/0!
4KO itr1	45
WT scl5	0	120	0				1	100
WT scl5	5	120	0				1	100
WT scl5	7	120	0				1	100
WT scl5	10	120	0				1	100
WT scl5	12	120	0				1	100
WT scl5	14	120	0				1	100
WT scl5	17	120	0				1	100
WT scl5	19	120	0				1	100
WT scl5	21	120	0				1	100
WT scl5	24	120	0				1	100
WT scl5	26	120	0				1	100
WT scl5	28	120	0				1	100
WT scl5	31	120	0				1	100
WT scl5	33	120	0				1	100
WT scl5	35	120	0				1	100
WT scl5	38	120	0				1	100
WT scl5	40	120	0				1	100
WT scl5	42	120	0				1	100
WT scl5	45	120	0				1	100
4OE scl5	0	117	0				1	100
4OE scl5	5	117	0				1	100
4OE scl5	7	117	0				1	100
4OE scl5	10	117	0				1	100
4OE scl5	12	117	0				1	100
4OE scl5	14	117	0				1	100
4OE scl5	17	117	0				1	100
4OE scl5	19	117	0				1	100
4OE scl5	21	117	0				1	100
4OE scl5	24	117	0				1	100
4OE scl5	26	117	0				1	100
4OE scl5	28	117	0				1	100
4OE scl5	31	117	0				1	100
4OE scl5	33	117	0				1	100
4OE scl5	35	117	0				1	100
4OE scl5	38	117	0				1	100
4OE scl5	40	117	0				1	100
4OE scl5	42	117	0				1	100
4OE scl5	45
4KO scl5	0	104	0				1	100
4KO scl5	5	104	0				1	100
4KO scl5	7	104	0				1	100
4KO scl5	10	104	0				1	100
4KO scl5	12	104	0				1	100
4KO scl5	14	104	0				1	100
4KO scl5	17	104	0				1	100
4KO scl5	19	104	0				1	100
4KO scl5	21	104	0				1	100
4KO scl5	24	104	0				1	100
4KO scl5	26	104	0				1	100
4KO scl5	28	104	0				1	100
4KO scl5	31	104	0				1	100
4KO scl5	33	104	0				1	100
4KO scl5	35	104	0				1	100
4KO scl5	38	104	0				1	100
4KO scl5	40	104	0				1	100
4KO scl5	42	104	0				1	100
4KO scl5	45
WT 50-50	0	123	0			0	1	100
WT 50-50	5	123	0			0	1	100
WT 50-50	7	123	0			0	1	100
WT 50-50	10	123	0			0	1	100
WT 50-50	12	123	0			0	1	100
WT 50-50	14	123	0			0	1	100
WT 50-50	17	123	0			0	1	100
WT 50-50	19	123	0			0	1	100
WT 50-50	21	123	0			0	1	100
WT 50-50	24	123	0			0	1	100
WT 50-50	26	123	0			0	1	100
WT 50-50	28	123	0			0	1	100
WT 50-50	31	123	0			0	1	100
WT 50-50	33	123	0			0	1	100
WT 50-50	35	123	0			0	1	100
WT 50-50	38	123	0			0	1	100
WT 50-50	40	123	0			0	1	100
WT 50-50	42	123	0			0	1	100
WT 50-50	45	123	0			0	1	100
4OE 50-50	0	117	0			0	1	100
4OE 50-50	5	117	0			0	1	100
4OE 50-50	7	117	0			0	1	100
4OE 50-50	10	117	0			0	1	100
4OE 50-50	12	117	0			0	1	100
4OE 50-50	14	117	0			0	1	100
4OE 50-50	17	117	0			0	1	100
4OE 50-50	19	117	0			0	1	100
4OE 50-50	21	117	0			0	1	100
4OE 50-50	24	117	0			0	1	100
4OE 50-50	26	117	0			0	1	100
4OE 50-50	28	117	0			0	1	100
4OE 50-50	31	117	0			0	1	100
4OE 50-50	33	117	0			0	1	100
4OE 50-50	35	117	0			0	1	100
4OE 50-50	38	117	0			0	1	100
4OE 50-50	40	117	0			0	1	100
4OE 50-50	42	117	0			0	1	100
4OE 50-50	45	117	0			0	1	100
		117
4KO 5050	0	114	0				1	100
4KO 5050	5	114	0				1	100
4KO 5050	7	114	0				1	100
4KO 5050	10	114	0				1	100
4KO 5050	12	114	0				1	100
4KO 5050	14	114	0				1	100
4KO 5050	17	114	0				1	100
4KO 5050	19	114	0				1	100
4KO 5050	21	114	0				1	100
4KO 5050	24	114	0				1	100
4KO 5050	26	114	0				1	100
4KO 5050	28	114	0				1	100
4KO 5050	31	114	0				1	100
4KO 5050	33	114	0				1	100
4KO 5050	35	114	0				1	100
4KO 5050	38	114	0				1	100
4KO 5050	40	114	0				1	100
4KO 5050	42	114	0				1	100
4KO 5050	45	114	0				1	100
							0

## Sheet: carbachol stats
% WT water [110]						condition	chi	pvalue	corrected_pvalue
#days	dead	censored				WT water v.s. fmo-4 OE water	50.83	0	0
0						WT water v.s. WT fmo-4 KO water	1.36	0.2443	1
5						WT water v.s. WT carbachol	39.67	0	0
7						WT water v.s. fmo-4 OE carbachol	52.94	0	0
10	0					WT water v.s. fmo-4 KO carbachol	4.34	0.0373	0.1863
13	3					fmo-4 OE water v.s. WT water	50.83	0	0
15	11					fmo-4 OE water v.s. WT fmo-4 KO water	65.11	0	0
17	13					fmo-4 OE water v.s. WT carbachol	0.22	0.6372	1
20	14					fmo-4 OE water v.s. fmo-4 OE carbachol	0.13	0.7196	1
22	21					fmo-4 OE water v.s. fmo-4 KO carbachol	105.5	0	0
24	21					WT fmo-4 KO water v.s. WT water	1.36	0.2443	1
27	9					WT fmo-4 KO water v.s. fmo-4 OE water	65.11	0	0
29	7					WT fmo-4 KO water v.s. WT carbachol	51.14	0	0
31	2					WT fmo-4 KO water v.s. fmo-4 OE carbachol	65.59	0	0
34	5					WT fmo-4 KO water v.s. fmo-4 KO carbachol	1.1	0.2946	1
36	4					WT carbachol v.s. WT water	39.67	0	0
38						WT carbachol v.s. fmo-4 OE water	0.22	0.6372	1
41						WT carbachol v.s. WT fmo-4 KO water	51.14	0	0
43						WT carbachol v.s. fmo-4 OE carbachol	0.54	0.463	1
45						WT carbachol v.s. fmo-4 KO carbachol	83.19	0	0
						fmo-4 OE carbachol v.s. WT water	52.94	0	0
% fmo-4 OE water [135]						fmo-4 OE carbachol v.s. fmo-4 OE water	0.13	0.7196	1
#days	dead	censored				fmo-4 OE carbachol v.s. WT fmo-4 KO water	65.59	0	0
0						fmo-4 OE carbachol v.s. WT carbachol	0.54	0.463	1
5						fmo-4 OE carbachol v.s. fmo-4 KO carbachol	102.58	0	0
7						fmo-4 KO carbachol v.s. WT water	4.34	0.0373	0.1863
10	0					fmo-4 KO carbachol v.s. fmo-4 OE water	105.5	0	0
13	0					fmo-4 KO carbachol v.s. WT fmo-4 KO water	1.1	0.2946	1
15	2					fmo-4 KO carbachol v.s. WT carbachol	83.19	0	0
17	4					fmo-4 KO carbachol v.s. fmo-4 OE carbachol	102.58	0	0
20	6
22	10
24	13
27	31
29	24
31	15
34	10
36	9
38	5
41	5
43	1
45
% WT fmo-4 KO water [103]
#days	dead	censored
0
5
7
10	0
13	4
15	11
17	14
20	19
22	16
24	15
27	9
29	7
31	2
34	6
36
38
41
43
45
% WT carbachol [118]
#days	dead	censored
0
5
7
10	0
13	0
15	1
17	2
20	7
22	10
24	23
27	23
29	15
31	11
34	11
36	4
38	6
41	3
43	1
45	1
% fmo-4 OE carbachol [134]
#days	dead	censored
0
5
7
10	0
13	0
15	1
17	4
20	7
22	10
24	20
27	24
29	18
31	16
34	11
36	6
38	12
41	4
43	1
45
% fmo-4 KO carbachol [143]
#days	dead	censored
0
5
7
10	0
13	5
15	11
17	16
20	33
22	23
24	26
27	19
29	6
31	4
34
36
38
41
43
45

## Sheet: edta stats
% WT water [110]					condition	chi	pvalue	corrected_pvalue
#days	dead	censored			WT water v.s. fmo-4 OE water	50.83	0	0
0					WT water v.s. WT fmo-4 KO water	1.36	0.2443	1
5					WT water v.s. WT edta	38.95	0	0
7					WT water v.s. fmo-4 OE edta	27.32	1.7e-07	8.6e-07
10	0				WT water v.s. fmo-4 KO edta	5.89	0.0152	0.076
13	3				fmo-4 OE water v.s. WT water	50.83	0	0
15	11				fmo-4 OE water v.s. WT fmo-4 KO water	65.11	0	0
17	13				fmo-4 OE water v.s. WT edta	1.18	0.2774	1
20	14				fmo-4 OE water v.s. fmo-4 OE edta	3.8	0.0514	0.2568
22	21				fmo-4 OE water v.s. fmo-4 KO edta	107.78	0	0
24	21				WT fmo-4 KO water v.s. WT water	1.36	0.2443	1
27	9				WT fmo-4 KO water v.s. fmo-4 OE water	65.11	0	0
29	7				WT fmo-4 KO water v.s. WT edta	51.53	0	0
31	2				WT fmo-4 KO water v.s. fmo-4 OE edta	37.53	0	0
34	5				WT fmo-4 KO water v.s. fmo-4 KO edta	2.03	0.1547	0.7734
36	4				WT edta v.s. WT water	38.95	0	0
38					WT edta v.s. fmo-4 OE water	1.18	0.2774	1
41					WT edta v.s. WT fmo-4 KO water	51.53	0	0
43					WT edta v.s. fmo-4 OE edta	0.76	0.3842	1
45					WT edta v.s. fmo-4 KO edta	86.85	0	0
					fmo-4 OE edta v.s. WT water	27.32	1.7e-07	8.6e-07
% fmo-4 OE water [135]					fmo-4 OE edta v.s. fmo-4 OE water	3.8	0.0514	0.2568
#days	dead	censored			fmo-4 OE edta v.s. WT fmo-4 KO water	37.53	0	0
0					fmo-4 OE edta v.s. WT edta	0.76	0.3842	1
5					fmo-4 OE edta v.s. fmo-4 KO edta	67.83	0	0
7					fmo-4 KO edta v.s. WT water	5.89	0.0152	0.076
10	0				fmo-4 KO edta v.s. fmo-4 OE water	107.78	0	0
13	0				fmo-4 KO edta v.s. WT fmo-4 KO water	2.03	0.1547	0.7734
15	2				fmo-4 KO edta v.s. WT edta	86.85	0	0
17	4				fmo-4 KO edta v.s. fmo-4 OE edta	67.83	0	0
20	6
22	10
24	13
27	31
29	24
31	15
34	10
36	9
38	5
41	5
43	1
45
% WT fmo-4 KO water [103]
#days	dead	censored
0
5
7
10	0
13	4
15	11
17	14
20	19
22	16
24	15
27	9
29	7
31	2
34	6
36
38
41
43
45
% WT edta [135]
#days	dead	censored
0
5
7
10	0
13	0
15	1
17	4
20	9
22	13
24	25
27	24
29	16
31	15
34	10
36	7
38	8
41	3
43
45
% fmo-4 OE edta [120]
#days	dead	censored
0
5
7
10	0
13	0
15	1
17	5
20	7
22	15
24	23
27	23
29	16
31	11
34	7
36	4
38	5
41	2
43	1
45
% fmo-4 KO edta [120]
#days	dead	censored
0
5
7
10	0
13	4
15	11
17	12
20	32
22	19
24	22
27	11
29	8
31	1
34
36
38
41
43
45

## Sheet: stats atf-4
% WT EV [119]								condition	chi	pvalue	corrected_pvalue
#days	dead	censored						WT EV v.s. WT atf4	12.96	0.0003	0.0029	****
0								WT EV v.s. C9 atf4	42.64	0	0	****
5								WT EV v.s. fmo2 atf4	0.68	0.4106	1	NS
7								WT EV v.s. 4OE atf4	39.94	0	0	****
9	0							WT EV v.s. 4KO atf4	0.12	0.7286	1	NS
13	1							WT EV v.s. fmo-2 OE EV	49.67	0	0	****
15	4							WT EV v.s. fmo-4 OE EV	53.7	0	0	****
17	7							WT EV v.s. fmo-4 KO EV	2.67	0.1022	0.9196
20	13							WT EV v.s. fmo-2 KO EV	0.01	0.9183	1
22	12							WT atf4 v.s. WT EV	12.96	0.0003	0.0029
24	31							WT atf4 v.s. C9 atf4	19.14	1.2e-05	0.0001
27	34							WT atf4 v.s. fmo2 atf4	17.05	3.6e-05	0.0003
29	9							WT atf4 v.s. 4OE atf4	10.92	0.001	0.0086
31	8							WT atf4 v.s. 4KO atf4	9.11	0.0025	0.0228
34								WT atf4 v.s. fmo-2 OE EV	22.68	1.9e-06	1.7e-05
36								WT atf4 v.s. fmo-4 OE EV	27.03	2e-07	1.8e-06
38								WT atf4 v.s. fmo-4 KO EV	25.49	4.4e-07	4e-06
41								WT atf4 v.s. fmo-2 KO EV	10.21	0.0014	0.0126
43								C9 atf4 v.s. WT EV	42.64	0	0
45								C9 atf4 v.s. WT atf4	19.14	1.2e-05	0.0001
								C9 atf4 v.s. fmo2 atf4	40.62	0	0
% WT atf4 [115]								C9 atf4 v.s. 4OE atf4	3.01	0.0826	0.7435
#days	dead	censored						C9 atf4 v.s. 4KO atf4	34.45	4.4e-09	3.9e-08
0								C9 atf4 v.s. fmo-2 OE EV	0.39	0.5315	1
5								C9 atf4 v.s. fmo-4 OE EV	0.64	0.4252	1
7								C9 atf4 v.s. fmo-4 KO EV	53.23	0	0
9	0							C9 atf4 v.s. fmo-2 KO EV	36.3	0	0
13	1							fmo2 atf4 v.s. WT EV	0.68	0.4106	1
15	4							fmo2 atf4 v.s. WT atf4	17.05	3.6e-05	0.0003
17	1							fmo2 atf4 v.s. C9 atf4	40.62	0	0
20	5							fmo2 atf4 v.s. 4OE atf4	40.58	0	0
22	8							fmo2 atf4 v.s. 4KO atf4	0.14	0.7086	1
24	26							fmo2 atf4 v.s. fmo-2 OE EV	46.4	0	0
27	24							fmo2 atf4 v.s. fmo-4 OE EV	49.75	0	0
29	36							fmo2 atf4 v.s. fmo-4 KO EV	0.53	0.4661	1
31	10							fmo2 atf4 v.s. fmo-2 KO EV	0.42	0.5179	1
34								4OE atf4 v.s. WT EV	39.94	0	0
36								4OE atf4 v.s. WT atf4	10.92	0.001	0.0086
38								4OE atf4 v.s. C9 atf4	3.01	0.0826	0.7435
41								4OE atf4 v.s. fmo2 atf4	40.58	0	0
43								4OE atf4 v.s. 4KO atf4	29.87	4.6e-08	4.2e-07
45								4OE atf4 v.s. fmo-2 OE EV	4.87	0.0274	0.2463
								4OE atf4 v.s. fmo-4 OE EV	6.53	0.0106	0.0952
								4OE atf4 v.s. fmo-4 KO EV	53.4	0	0
% C9 atf4 [109]								4OE atf4 v.s. fmo-2 KO EV	31	2.6e-08	2.3e-07
#days	dead	censored						4KO atf4 v.s. WT EV	0.12	0.7286	1
0								4KO atf4 v.s. WT atf4	9.11	0.0025	0.0228
5								4KO atf4 v.s. C9 atf4	34.45	4.4e-09	3.9e-08
7								4KO atf4 v.s. fmo2 atf4	0.14	0.7086	1
9	0							4KO atf4 v.s. 4OE atf4	29.87	4.6e-08	4.2e-07
13	0							4KO atf4 v.s. fmo-2 OE EV	39.7	0	0
15	3							4KO atf4 v.s. fmo-4 OE EV	43.09	0	0
17	5							4KO atf4 v.s. fmo-4 KO EV	1.11	0.2925	1
20	5							4KO atf4 v.s. fmo-2 KO EV	0.01	0.9399	1
22	7							fmo-2 OE EV v.s. WT EV	49.67	0	0
24	14							fmo-2 OE EV v.s. WT atf4	22.68	1.9e-06	1.7e-05
27	12							fmo-2 OE EV v.s. C9 atf4	0.39	0.5315	1
29	25							fmo-2 OE EV v.s. fmo2 atf4	46.4	0	0
31	19							fmo-2 OE EV v.s. 4OE atf4	4.87	0.0274	0.2463
34	10							fmo-2 OE EV v.s. 4KO atf4	39.7	0	0
36	7							fmo-2 OE EV v.s. fmo-4 OE EV	0.01	0.9312	1
38	2							fmo-2 OE EV v.s. fmo-4 KO EV	59.81	0	0
41								fmo-2 OE EV v.s. fmo-2 KO EV	40.57	0	0
43								fmo-4 OE EV v.s. WT EV	53.7	0	0
45								fmo-4 OE EV v.s. WT atf4	27.03	2e-07	1.8e-06
								fmo-4 OE EV v.s. C9 atf4	0.64	0.4252	1
								fmo-4 OE EV v.s. fmo2 atf4	49.75	0	0
								fmo-4 OE EV v.s. 4OE atf4	6.53	0.0106	0.0952
% fmo2 atf4 [77]								fmo-4 OE EV v.s. 4KO atf4	43.09	0	0
#days	dead	censored						fmo-4 OE EV v.s. fmo-2 OE EV	0.01	0.9312	1
0								fmo-4 OE EV v.s. fmo-4 KO EV	64.02	0	0
5								fmo-4 OE EV v.s. fmo-2 KO EV	44.86	0	0
7								fmo-4 KO EV v.s. WT EV	2.67	0.1022	0.9196
9	0							fmo-4 KO EV v.s. WT atf4	25.49	4.4e-07	4e-06
13	0							fmo-4 KO EV v.s. C9 atf4	53.23	0	0
15	7							fmo-4 KO EV v.s. fmo2 atf4	0.53	0.4661	1
17	2							fmo-4 KO EV v.s. 4OE atf4	53.4	0	0
20	5							fmo-4 KO EV v.s. 4KO atf4	1.11	0.2925	1
22	10							fmo-4 KO EV v.s. fmo-2 OE EV	59.81	0	0
24	26							fmo-4 KO EV v.s. fmo-4 OE EV	64.02	0	0
27	16							fmo-4 KO EV v.s. fmo-2 KO EV	1.89	0.1691	1
29	9							fmo-2 KO EV v.s. WT EV	0.01	0.9183	1
31	2							fmo-2 KO EV v.s. WT atf4	10.21	0.0014	0.0126
34								fmo-2 KO EV v.s. C9 atf4	36.3	0	0
36								fmo-2 KO EV v.s. fmo2 atf4	0.42	0.5179	1	NS
38								fmo-2 KO EV v.s. 4OE atf4	31	2.6e-08	2.3e-07
41								fmo-2 KO EV v.s. 4KO atf4	0.01	0.9399	1
43								fmo-2 KO EV v.s. fmo-2 OE EV	40.57	0	0
45								fmo-2 KO EV v.s. fmo-4 OE EV	44.86	0	0
								fmo-2 KO EV v.s. fmo-4 KO EV	1.89	0.1691	1
% 4OE atf4 [121]
#days	dead	censored
0
5
7
9	0
13	0
15	4
17	1
20	4
22	7
24	14
27	29
29	35
31	15
34	9
36	3
38
41
43
45
% 4KO atf4 [82]
#days	dead	censored
0
5
7
9	0
13	7
15	6
17	5
20	12
22	5
24	15
27	14
29	10
31	8
34
36
38
41
43
45
% fmo-2 OE EV [112]
#days	dead	censored
0
5
7
9	0
13	1
15	1
17	4
20	6
22	6
24	11
27	19
29	25
31	15
34	14
36	6
38	2
41	0
43	2
45
% fmo-4 OE EV [117]
#days	dead	censored
0
5
7
9	0
13	2
15	2
17	4
20	5
22	6
24	13
27	14
29	26
31	19
34	17
36	4
38	5
41
43
45
% fmo-4 KO EV [100]
#days	dead	censored
0
5
7
9	0
13	4
15	7
17	5
20	13
22	10
24	27
27	21
29	11
31	2
34
36
38
41
43
45
% fmo-2 KO EV [86]
#days	dead	censored
0
5
7
9	0
13	3
15	5
17	9
20	8
22	10
24	14
27	15
29	19
31	3
34
36
38
41
43
45

## Sheet: Sheet1
#1	N2								#1	N2					#1	N2
#2	Lei42	fmo-2p::MC; unc-119p::HIF-1(P621A); JT307 #1							#2	Lei42	fmo-2p::MC; unc-119p::HIF-1(P621A); JT307 #1				#11L	Lei51	fmo-2p::MC; JT307; gcy-31; gcy-36 - XA2262 sibling #1
#3	Lei43	fmo-2p::MC; unc-119p::HIF-1(P621A); JT307 #2							#3	Lei43	fmo-2p::MC; unc-119p::HIF-1(P621A); JT307 #2				#12L	Lei52	fmo-2p::MC; JT307; gcy-33; gcy-36 - XA2262 sibling #1
#4	Lei44	fmo-2p::MC; TU3311; CB5602 #1							#4	Lei44	fmo-2p::MC; TU3311; CB5602 #1				#13	Lei53	fmo-2p::MC; JT307; gcy-33; gcy-36 - XA2262 sibling #2
#5	Lei45	fmo-2p::MC; TU3311 #1							#5	Lei45	fmo-2p::MC; TU3311 #1				#14L	Lei55	fmo-2p::MC; JT307 - XA2262 sibling #1
#6	Lei46	fmo-2p::MC; CB5602 #1							#6	Lei46	fmo-2p::MC; CB5602 #1				#15L	Lei56	fmo-2p::MC; JT307 - XA2262 sibling #2
#7	Lei47	fmo-2p::MC; TU3311; CB5602 #2							#7	Lei47	fmo-2p::MC; TU3311; CB5602 #2				#16	Lei57	fmo-2p::MC - XA2262 sibling #1
#8L	Lei48	fmo-2p::MC; JT307; XA2262 #1													#17	Lei58	fmo-2p::MC - XA2262 sibling #2
#9	Lei49	fmo-2p::MC; JT307; XA2262 #2													#18	Lei59	fmo-2p::MC; gcy-33; gcy-36 - XA2262 sibling #1
#10L	Lei50	fmo-2p::MC; JT307; XA2262 #3							#1	N2					#19	Lei60	fmo-2p::MC; gcy-33; gcy-36 - XA2262 sibling #2
#11L	Lei51	fmo-2p::MC; JT307; gcy-31; gcy-36 - XA2262 sibling #1							#8L	Lei48	fmo-2p::MC; JT307; XA2262 #1
#12L	Lei52	fmo-2p::MC; JT307; gcy-33; gcy-36 - XA2262 sibling #1							#9	Lei49	fmo-2p::MC; JT307; XA2262 #2
#13	Lei53	fmo-2p::MC; JT307; gcy-33; gcy-36 - XA2262 sibling #2							#10L	Lei50	fmo-2p::MC; JT307; XA2262 #3
#14L	Lei55	fmo-2p::MC; JT307 - XA2262 sibling #1							#14L	Lei55	fmo-2p::MC; JT307 - XA2262 sibling #1
#15L	Lei56	fmo-2p::MC; JT307 - XA2262 sibling #2							#15L	Lei56	fmo-2p::MC; JT307 - XA2262 sibling #2
#16	Lei57	fmo-2p::MC - XA2262 sibling #1							#16	Lei57	fmo-2p::MC - XA2262 sibling #1
#17	Lei58	fmo-2p::MC - XA2262 sibling #2							#17	Lei58	fmo-2p::MC - XA2262 sibling #2
#18	Lei59	fmo-2p::MC; gcy-33; gcy-36 - XA2262 sibling #1							#20	Lei61	fmo-2p::MC; XA2262 #1
#19	Lei60	fmo-2p::MC; gcy-33; gcy-36 - XA2262 sibling #2							#21	Lei62	fmo-2p::MC; XA2262 #2
#20	Lei61	fmo-2p::MC; XA2262 #1
#21	Lei62	fmo-2p::MC; XA2262 #2
