# Supplementary material for: fmo-4 promotes longevity and stress resistance via ER to mitochondria calcium regulation in C. elegans
Source: eLife journal article supplement (doi:10.7554/elife.99971), 2024-08-27
Supplement: fig5-figsupp1-data1 [file 20Sept2024 GCAMP7 Testing.xlsx]

## Sheet: Sheet1
	gcamp7f plain 2						carbachol							edta							gcanp plain 1
	1	5606.46	611.641	167	3265		1	3185.96	1021.61	246	4720			1	3577.04	957.286	224	11339			1	7384.55	666.989	206	2900
	2	5343.66	769.106	192	3413		2	4100.56	1108.27	329	10844			2	4625.12	747.549	216	3456			2	5745.16	910.442	259	6508
	3	6235.31	790.098	254	2843		3	3564.52	1226.57	259	9248			3	5793.13	985.307	223	12556			3	4534.39	846.603	307	3805
	4	4566.72	882.551	224	4571		4	4137.06	1238.07	393	9594			4	5298.81	649.484	208	4716			4	5992.32	1080.03	235	9906
	5	4395.69	971.557	269	4774		5	3495.69	942.268	290	5739			5	6323.95	657.508	299	5840			5	6364.62	783.678	241	5326
	6	6385.48	899.662	262	3568		6	4347.72	1374.46	290	8079			6	4888.97	735.352	256	4201			6	5625.23	1050.08	249	6470
	7	6123.72	896.109	193	4376		7	6010.05	929.081	286	7117			7	6114.34	908.043	273	5095			7	7601.47	789.948	240	7370
	8	6009.01	864.997	256	5776		8	3833.58	1022.44	298	5837			8	4073.44	945.548	253	4094			8	6667.06	831.988	238	7028
	9	4417.59	843.187	276	6046		9	5247.71	989.748	408	5677			9	4601.13	975.611	263	7761			9	4913.99	566.831	205	2056
	10	6554.43	737.631	217	1787		10	4259.07	1128.88	419	6086			10	5093.37	717.038	302	4397			10	5788.96	1058.31	246	6254
	11	5773.32	782.094	241	3937		11	4621.99	1067.94	221	12844			11	5177.84	783.307	209	4419			11	6412.6	992.156	252	9429
	12	5635.66	758.426	262	2468		12	4146.44	1027.7	275	6454			12	4602.18	831.792	322	4397			12	5989.19	950.128	197	6785
	13	3337.18	935.266	405	3275		13	4206.93	922.971	222	5192			13	5265.44	901.929	247	7761			13	6921.52	714.335	208	4433
	14	5080.85	871.91	262	4774		14	3322.58	947.801	214	4563			14	4072.4	811.45	270	5031			14	4851.42	1569.67	723	4205
	15	5577.26	855.366	252	4571		15	2374.61	1254.17	271	6663			15	5936.01	606.606	194	4716			15	5501.13	975.235	258	8025
	16	5660.69	785.563	245	2843		16	3268.35	1001.86	349	6485			16	6680.61	669.86	298	5840			16	5095.45	771.48	351	3707
	17	6025.69	755.316	225	1787		17	4292.44	889.362	204	6538			17	6993.47	898.182	290	5629			17	5971.46	1198.58	503	4691
	18	4926.51	774.148	218	3520		18	2876.23	1027.62	248	3543			18	3946.21	870.147	331	3651			18	6790.11	798.853	223	4900
	19	88479	182.726	117	394		19	5042.27	875.767	190	6454			19	4484.33	839.398	257	3684			19	7633.8	831.329	202	4158
							20	4430.1	1040.9	408	5677			20	3994.18	699.389	190	2635			20	4803.45	813.316	351	7011
							21	52794.2	165.9	103	891			21	48421.4	209.221	139	576			21	5452.11	577.897	221	2056
																					22	7554.54	856.432	252	7370
																					23	6314.57	738.893	262	3805
																					24	4044.24	1029.92	389	6508
																					25	56510.9	234.911	158	493

## Sheet: Sheet2
gcamp plain	Fluoresence Intentsity	BGC	Mean	Standard Dev		gcamp carbachol	Fluorescence	BGC	Mean	Standard Dev				gcamp edta	Fluoresence Intentsity	BGC	Mean	Standard Dev
1	611.641	428.915	638.642	279.105		1	1021.61	855.711	885.975	133.957				1	957.286	748.065	600.318	119.568
2	769.106	586.38	638.642			2	1108.27	942.372						2	747.549	538.328
3	790.098	607.372				3	1226.57	1060.67						3	985.307	776.086
4	882.551	699.825				4	1238.07	1072.17						4	649.484	440.263
5	971.557	788.831				5	942.268	776.368						5	657.508	448.287
6	899.662	716.936				6	1374.46	1208.56						6	735.352	526.131
7	896.109	713.383				7	929.081	763.181						7	908.043	698.822
8	864.997	682.271				8	1022.44	856.538						8	945.548	736.327
9	843.187	660.461				9	989.748	823.848						9	975.611	766.39
10	737.631	554.905				10	1128.88	962.978						10	717.038	507.817
11	782.094	599.368				11	1067.94	902.038						11	783.307	574.086
12	758.426	575.7				12	1027.7	861.8						12	831.792	622.571
13	935.266	752.54				13	922.971	757.071						13	901.929	692.708
14	871.91	689.184				14	947.801	781.901						14	811.45	602.229
15	855.366	672.64				15	1254.17	1088.27						15	606.606	397.385
16	785.563	602.837				16	1001.86	835.962						16	669.86	460.639
17	755.316	572.59				17	889.362	723.462						17	898.182	688.961
18	774.148	591.422				18	1027.62	861.719						18	870.147	660.926
	182.726						875.767	709.867						20	839.398	630.177
							1040.9	875.005							699.389	490.168
							165.9								209.221
	plain	carbachol	EDTA
	0.671605	1.33989	1.17134
	0.918167	1.47559	0.842926
	0.951036	1.66082	1.21521
	1.0958	1.67883	0.689373
	1.23517	1.21565	0.701938
	1.12259	1.8924	0.823827
	1.11703	1.19501	1.09423
	1.06831	1.34119	1.15296
	1.03416	1.29	1.20003
	0.868882	1.50785	0.795151
	0.938504	1.41243	0.898916
	0.901444	1.34943	0.974835
	1.17834	1.18544	1.08466
	1.07914	1.22432	0.942983
	1.05323	1.70403	0.622234
	0.943935	1.30897	0.721279
	0.896574	1.13281	1.07879
	0.926062	1.3493	1.03489
		1.11153	0.986745
		1.3701	0.767516

## Sheet: time course
	gcamp 1 no carb						gcamp1 carb 1min						gcamp1 carb 2min						gcamp1 carb 5min						gcamp1 carb 10min						gcamp1 carb 15min						gcamp1 carb 20min
	1	7384.55	666.989	206	2900		1	4388.39	635.269	225	1825		1	5316.54	666.204	211	1707		1	4651.19	857.795	228	5746		1	4083.87	997.263	249	5277		1	4137.06	713.585	200	2860		1	4807.62	675.087	213	2276
	2	5745.16	910.442	259	6508		2	6339.6	668.852	238	2909		2	3847.14	638.679	252	1878		2	6022.56	698.846	210	4872		2	4367.53	991.221	395	4966		2	5999.62	896.696	193	7002		2	3637.52	908.253	304	3962
	3	4534.39	846.603	307	3805		3	4934.85	678.784	213	2791		3	4119.33	641.251	285	1571		3	4833.69	829.198	246	4374		3	4361.27	755.568	217	3694		3	4691.86	1004.88	273	7435		3	4511.45	686.888	228	2551
	4	5992.32	1080.03	235	9906		4	3771.01	698.484	331	2180		4	4701.25	635.192	224	3431		4	3733.47	785.716	246	4085		4	5290.47	913.034	370	4966		4	6096.61	816.517	212	7216		4	5508.43	602.455	220	1995
	5	6364.62	783.678	241	5326		5	2769.86	789.464	156	2780		5	3580.17	767.712	271	2501		5	4387.35	742.657	214	5255		5	4878.54	911.693	247	5277		5	4677.26	1032.88	242	7435		5	6009.01	830.417	226	4045
	6	5625.23	1050.08	249	6470		6	4408.2	655.316	216	1948		6	4336.25	604.252	221	2109		6	3109.83	725.546	357	2139		6	3559.31	721.851	304	1841		6	4154.79	823.603	324	2838		6	4011.91	803.979	239	3206
	7	7601.47	789.948	240	7370		7	4371.7	639.308	245	2537		7	4245.52	744.905	222	2026		7	3147.38	723.191	248	3322		7	4520.83	981.694	350	4246		7	4177.73	817.967	195	7023		7	7403.32	527.885	190	1983
	8	6667.06	831.988	238	7028		8	4233	718.187	294	3202		8	3795	686.419	276	1981		8	3486.31	859.354	251	6218		8	4642.85	1102.02	223	8517		8	3885.73	753.647	419	5014		8	4018.17	1019.99	458	3391
	9	4913.99	566.831	205	2056		9	5114.23	698.769	208	4742		9	3895.11	709.051	313	3272		9	4044.24	857.078	212	3543		9	4795.11	818.682	167	5645		9	3566.61	807.551	246	2780		9	4075.53	924.073	240	4428
	10	5788.96	1058.31	246	6254		10	2942.97	630.805	316	1319		10	4981.78	629.581	216	2222		10	3373.68	781.746	241	3622		10	3753.28	849.795	255	2716		10	2951.32	1097.48	280	5225		10	4338.33	661.38	180	1900
	11	6412.6	992.156	252	9429		11	6239.48	694.477	180	4261		11	4374.83	660.779	223	2526		11	3270.43	928.638	275	4566		11	4706.46	747.035	279	4936		11	4106.81	1243.04	452	7721		11	3739.72	677.215	238	1643
	12	5989.19	950.128	197	6785		12	3301.72	552.82	175	2068		12	2936.72	775.309	280	2252		12	4455.13	761.904	354	5017		12	2993.03	812.698	415	2516		12	4462.43	1119.65	212	9212		12	5366.6	542.647	210	1430
	13	6921.52	714.335	208	4433		13	3663.6	613.252	182	2295		13	5725.35	675.507	220	2479		13	3821.07	914.426	277	4454		13	4138.1	880.69	268	3753		13	4301.83	930.376	292	4416		13	3380.98	657.679	308	1601
	14	4851.42	1569.67	723	4205		14	5442.73	660.164	209	4742		14	4438.45	581.477	206	1734		14	5447.94	846.848	270	5155		14	4528.13	888.926	260	3910		14	5498	780.342	211	6057		14	4505.19	638.228	218	1983
	15	5501.13	975.235	258	8025		15	43706.6	190.322	130	289		15	3950.39	709.584	227	1965		15	4298.7	851.477	278	4667		15	5151.77	882.703	208	4258		15	4642.85	1036.93	229	8531		15	3799.17	779.087	324	2551
	16	5095.45	771.48	351	3707								16	4072.4	769.909	233	3434		16	5097.54	687.129	216	4402		16	5199.74	757.764	203	6592		16	4237.17	870.731	224	7086		16	3950.39	826.456	323	3206
	17	5971.46	1198.58	503	4691								17	4813.88	768.895	219	3387		17	6676.44	715.21	193	4759		17	5614.8	782.134	211	3721		17	4969.27	899.557	237	11142		17	3666.72	754.918	341	2804
	18	6790.11	798.853	223	4900								18	4457.22	680.859	235	1707		18	5696.15	758.388	213	5746		18	3737.64	810.991	280	4936		18	41006.6	169.009	113	377		18	3550.97	706.399	319	2309
	19	7633.8	831.329	202	4158								19	38585.1	183.703	129	356		19	45476.4	168.362	104	345		19	4200.67	941.596	351	5252								19	4393.6	912.693	340	5124
	20	4803.45	813.316	351	7011																				20	43061.1	179.45	119	330								20	64872.7	181.391	113	351
	21	5452.11	577.897	221	2056
	22	7554.54	856.432	252	7370
	23	6314.57	738.893	262	3805
	24	4044.24	1029.92	389	6508
	25	56510.9	234.911	158	493
	gcamp2 no edta						gcamp2 edta 1min						gcamp2 edta 2min						gcamp2 edta 5min						gcamp2 edta 10min						gcamp2 edta 15min						gcamp2 edta 20min
	1	5606.46	611.641	167	3265		1	6553.38	581.254	159	3483		1	5508.43	622.822	148	4226		1	4237.17	545.509	146	2389		1	2631.16	682.702	273	1602		1	3732.43	570.797	161	1663		1	2982.6	689.978	168	2390
	2	5343.66	769.106	192	3413		2	6314.57	592.218	156	5145		2	5055.82	605.728	145	3624		2	3501.95	876.041	191	5672		2	4083.87	553.376	172	1482		2	6652.46	498.354	157	1595		2	4102.64	589.071	171	2177
	3	6235.31	790.098	254	2843		3	6212.37	527.314	162	2768		3	3910.76	745.049	149	3805		3	5475.06	685.53	190	5323		3	3003.46	617.95	165	1759		3	4115.16	617.875	161	2548		3	3442.51	889.015	352	2121
	4	4566.72	882.551	224	4571		4	7888.26	704.643	171	8000		4	5058.95	676.222	157	5081		4	4916.08	617.201	156	5921		4	4357.1	615.191	175	1948		4	5101.71	533.437	171	2244		4	4355.02	688.535	205	1821
	5	4395.69	971.557	269	4774		5	8184.43	562.777	163	6051		5	3540.54	757.006	186	4069		5	4095.34	793.913	161	3078		5	3312.15	739.71	236	2426		5	4103.69	617.676	206	2855		5	3170.32	677.159	303	2138
	6	6385.48	899.662	262	3568		6	6511.67	419.741	147	1611		6	4786.77	681.831	197	3751		6	5439.6	641.255	167	5033		6	3223.51	576.763	218	1751		6	3435.21	572.491	185	1403		6	2844.94	881.649	291	1779
	7	6123.72	896.109	193	4376		7	7506.56	705.433	192	5384		7	5371.81	701.934	196	5292		7	4546.9	767.971	198	5374		7	2412.15	673.559	241	3207		7	4085.96	670.607	211	3005		7	3459.19	857.643	285	2372
	8	6009.01	864.997	256	5776		8	7141.56	690.709	194	6869		8	4728.36	736.818	206	6787		8	5870.31	791.965	202	4344		8	3492.57	731.772	225	2351		8	4461.39	745.459	196	4960		8	5807.73	563.393	152	2867
	9	4417.59	843.187	276	6046		9	7869.48	743.48	203	4025		9	4490.59	804.401	222	6501		9	4948.41	855.737	217	3181		9	3992.1	663.527	184	1723		9	3218.29	578.548	189	1864		9	2771.94	635.399	211	2475
	10	6554.43	737.631	217	1787		10	8306.44	541.832	190	2903		10	6195.68	807.261	208	8636		10	5787.92	655.349	170	5047		10	4481.2	546.799	171	1954		10	4469.73	663.568	233	2100		10	3468.58	712.273	299	1573
	11	5773.32	782.094	241	3937		11	5298.81	773.184	195	4288		11	5288.39	690.84	192	3623		11	4134.97	761.101	195	3799		11	3808.55	591.883	205	2783		11	5128.83	573.678	177	1786		11	4859.77	768.012	235	2555
	12	5635.66	758.426	262	2468		12	6865.2	525.813	173	3814		12	6374.01	650.71	151	4161		12	6256.17	697.789	201	4992		12	2884.57	730.427	342	1530		12	4332.07	681.741	191	2340		12	4263.24	548.854	189	1407
	13	3337.18	935.266	405	3275		13	4851.42	484.017	160	1611		13	6214.45	573.708	161	3255		13	5429.17	705.248	213	4502		13	4593.83	620.377	214	2415		13	4782.59	561.45	223	1657		13	5340.53	655.87	195	2986
	14	5080.85	871.91	262	4774		14	72321.9	224.456	149	336		14	4461.39	783.033	219	3723		14	4760.69	776.067	190	5323		14	5494.87	620.268	181	3430		14	4313.3	516.282	188	2036		14	3625.01	800.388	230	2395
	15	5577.26	855.366	252	4571								15	5560.57	701.237	204	4723		15	43971.5	226.904	151	450		15	4048.41	609.515	229	2168		15	46034.3	226.157	146	447		15	49799	229.02	138	386
	16	5660.69	785.563	245	2843								16	5743.07	540.654	187	3317								16	57928.2	224.045	150	1037
	17	6025.69	755.316	225	1787								17	59207.8	250.155	158	792
	18	4926.51	774.148	218	3520
	19	88479	182.726	117	394

## Sheet: carb time course 
gcamp plain	Fluoresence Intentsity	BGC	Mean	Standard Dev		carb 1min	Fluorescence	BGC	Mean	Standard Dev				5min	Fluoresence Intentsity	BGC	Mean	Standard Dev		10min	Fluoresence Intentsity	BGC	Mean	Standard Dev		15min	Fluoresence Intentsity	BGC	Mean	Standard Dev		20min	Fluoresence Intentsity	BGC	Mean	Standard Dev
1	666.989	432.078	656.886	318.168		1	635.269	444.947	476.389	55.2666				1	857.795	689.433	627.48	74.2653			997.263	817.813	691.463	101.877			713.585	544.576	878.581	146.985			675.087	675.087	715.856	135.376
2	910.442	675.531	656.886			2	668.852	478.53						2	698.846	530.484					991.221	811.771					896.696	727.687					908.253	908.253
3	846.603	611.692				3	678.784	488.462						3	829.198	660.836					755.568	576.118					1004.88	835.874					686.888	686.888
4	1080.03	845.122				4	698.484	508.162						4	785.716	617.354					913.034	733.584					816.517	647.508					602.455	602.455
5	783.678	548.767				5	789.464	599.142						5	742.657	574.295					911.693	732.243					1032.88	863.876					830.417	830.417
6	1050.08	815.172				6	655.316	464.994						6	725.546	557.184					721.851	542.401					823.603	654.594					803.979	803.979
7	789.948	555.037				7	639.308	448.986						7	723.191	554.829					981.694	802.244					817.967	648.958					527.885	527.885
8	831.988	597.077				8	718.187	527.865						8	859.354	690.992					1102.02	922.567					753.647	584.638					1019.99	1019.99
9	566.831	331.92				9	698.769	508.447						9	857.078	688.716					818.682	639.232					807.551	638.542					924.073	924.073
10	1058.31	823.395				10	630.805	440.483						10	781.746	613.384					849.795	670.345					1097.48	928.476					661.38	661.38
11	992.156	757.245				11	694.477	504.155						11	928.638	760.276					747.035	567.585					1243.04	1074.04					677.215	677.215
12	950.128	715.217				12	552.82	362.498						12	761.904	593.542					812.698	633.248					1119.65	950.641					542.647	542.647
13	714.335	479.424				13	613.252	422.93						13	914.426	746.064					880.69	701.24					930.376	761.367					657.679	657.679
14	1569.67	1334.76				14	660.164	469.842						14	846.848	678.486					888.926	709.476					780.342	611.333					638.228	638.228
15	975.235	740.324				15	190.322							15	851.477	683.115					882.703	703.253					1036.93	867.92					779.087	779.087
16	771.48	536.569				16								16	687.129	518.767					757.764	578.314					870.731	701.722					826.456	826.456
17	1198.58	963.666				17								17	715.21	546.848					782.134	602.684					899.557	730.548					754.918	754.918
18	798.853	563.942				18								18	758.388	590.026					810.991	631.541					169.009						706.399	706.399
	831.329	596.418												20	168.362						941.596	762.146											912.693	912.693
	813.316	578.405																			179.45												181.391	181.391
	577.897	342.986
	856.432	621.521
	738.893	503.982
	1029.92	795.007
	234.911
	0min	1min	5min	10min	15min	20min
	0.657767	0.677358	1.04955	1.24498	0.829027	1.02771
	1.02838	0.728483	0.807574	1.23579	1.10778	1.38266
	0.9312	0.743603	1.00601	0.877044	1.27248	1.04567
	1.28656	0.773593	0.939819	1.11676	0.985724	0.917138
	0.835407	0.912095	0.874269	1.11472	1.31511	1.26417
	1.24096	0.707876	0.84822	0.825716	0.996511	1.22392
	0.844952	0.683507	0.844635	1.22128	0.987931	0.803618
	0.908951	0.803587	1.05192	1.40446	0.890015	1.55276
	0.505293	0.774026	1.04846	0.973125	0.972074	1.40675
	1.25348	0.670562	0.933776	1.02049	1.41345	1.00684
	1.15278	0.767493	1.15739	0.864054	1.63504	1.03095
	1.0888	0.551843	0.903569	0.964015	1.44719	0.82609
	0.729844	0.643841	1.13576	1.06752	1.15906	1.00121
	2.03196	0.715257	1.03288	1.08006	0.930653	0.971596
	1.12702		1.03993	1.07059	1.32126	1.18603
	0.816837		0.789737	0.880387	1.06826	1.25814
	1.46702		0.832486	0.917487	1.11214	1.14924
	0.858508		0.898217	0.961417		1.07538
	0.907948			1.16024		1.38942
	0.880526					0.276138
	0.522139
	0.946163
	0.767229
	1.21027

## Sheet: edta time course
gcamp plain	Fluoresence Intentsity	BGC	Mean	Standard Dev		edta 1min	Fluorescence	BGC	Mean	Standard Dev				5min	Fluoresence Intentsity	BGC	Mean	Standard Dev		10min	Fluoresence Intentsity	BGC	Mean	Standard Dev		15min	Fluoresence Intentsity	BGC	Mean	Standard Dev		20min	Fluoresence Intentsity	BGC	Mean	Standard Dev
1	611.641	428.915	638.642	279.469		1	581.254	356.798	379.576	109.001				1	545.509	318.605	499.573	93.3383			682.702	458.657	414.21	62.8538			570.797	344.64	575.208	69.8998			689.978	460.958	679.084	113.459
2	769.106	586.38	638.642			2	592.218	367.762						2	876.041	649.137					553.376	329.331					498.354	272.197					589.071	360.051
3	790.098	607.372				3	527.314	302.858						3	685.53	458.626					617.95	393.905					617.875	391.718					889.015	659.995
4	882.551	699.825				4	704.643	480.187						4	617.201	390.297					615.191	391.146					533.437	307.28					688.535	459.515
5	971.557	788.831				5	562.777	338.321						5	793.913	567.009					739.71	515.665					617.676	391.519					677.159	448.139
6	899.662	716.936				6	419.741	195.285						6	641.255	414.351					576.763	352.718					572.491	346.334					881.649	652.629
7	896.109	713.383				7	705.433	480.977						7	767.971	541.067					673.559	449.514					670.607	444.45					857.643	628.623
8	864.997	682.271				8	690.709	466.253						8	791.965	565.061					731.772	507.727					745.459	519.302					563.393	334.373
9	843.187	660.461				9	743.48	519.024						9	855.737	628.833					663.527	439.482					578.548	352.391					635.399	406.379
10	737.631	554.905				10	541.832	317.376						10	655.349	428.445					546.799	322.754					663.568	437.411					712.273	483.253
11	782.094	599.368				11	773.184	548.728						11	761.101	534.197					591.883	367.838					573.678	347.521					768.012	538.992
12	758.426	575.7				12	525.813	301.357						12	697.789	470.885					730.427	506.382					681.741	455.584					548.854	319.834
13	935.266	752.54				13	484.017	259.561						13	705.248	478.344					620.377	396.332					561.45	335.293					655.87	426.85
14	871.91	689.184				14	224.456							14	776.067	549.163					620.268	396.223					516.282	290.125					800.388	571.368
15	855.366	672.64				15								15	226.904						609.515	385.47					226.157						229.02
16	785.563	602.837				16															224.045
17	755.316	572.59				17
18	774.148	591.422				18
	182.726
	0min	30sec	5min	10min	15min	20min
	0.671605	0.558682	0.498879	0.718175	0.539645	0.721778
	0.918167	0.57585	1.01643	0.515674	0.426212	0.563776
	0.951036	0.474222	0.718127	0.616785	0.613361	1.03343
	1.0958	0.751887	0.611136	0.612465	0.481146	0.719519
	1.23517	0.52975	0.887835	0.80744	0.613049	0.701706
	1.12259	0.305782	0.6488	0.552294	0.542297	1.0219
	1.11703	0.753124	0.847215	0.703859	0.69593	0.984312
	1.06831	0.730069	0.884785	0.79501	0.813134	0.523569
	1.03416	0.812699	0.984641	0.688151	0.551782	0.636317
	0.868882	0.496954	0.670869	0.505375	0.684908	0.756688
	0.938504	0.85921	0.836457	0.575969	0.544156	0.843965
	0.901444	0.471871	0.737322	0.792904	0.713363	0.500803
	1.17834	0.406426	0.749002	0.620585	0.525009	0.668371
	1.07914		0.859891	0.620415	0.454284	0.894661
	1.05323			0.603577
	0.943935
	0.896574
	0.926062
