# Supplementary material for: fmo-4 promotes longevity and stress resistance via ER to mitochondria calcium regulation in C. elegans
Source: eLife journal article supplement (doi:10.7554/elife.99971), 2024-08-27
Supplement: fig5-figsupp1-data1 [file 24Sept2024 time course GCAMP7 Testing.xlsx]

## Sheet: Sheet1
	gcamp7f plain 2						carbachol							edta							gcanp plain 1
	1	4815.29	971.971	192	7965		1	2913.87	1050.84	247	3483			1	4025.09	510.072	167	2204			1	8494.67	489.162	182	2047
	2	3901.62	927.52	235	5638		2	3536.16	735.312	199	2344			2	4528.85	593.386	161	3458			2	7329.12	593.539	192	2509
	3	3086.73	953.479	234	5197		3	3017.58	860.9	220	2836			3	7664.96	382.919	157	3287			3	8297.12	642.389	181	4457
	4	6079.62	709.467	184	2826		4	5007.91	953.574	288	3380			4	5605.5	590.63	216	2127			4	7131.57	649.756	200	3411
	5	3610.24	1095.81	219	7965		5	8504.55	702.181	205	3316			5	3906.56	580.236	184	3617			5	6958.72	752.609	216	2991
	6	4385.62	1126.2	230	3279		6	6114.19	708.701	222	3458			6	5684.52	495.62	182	1628			6	7511.86	620.286	230	2481
	7	3244.77	885.963	394	5862		7	6331.49	751.435	236	4264			7	7101.94	397.585	148	2106			7	5393.13	666.158	216	3056
	8	3891.75	1118.63	274	5467		8	5822.8	872.373	290	4963			8	6005.54	363.589	144	1546			8	7655.08	509.886	192	3222
	9	2439.75	1075.3	291	4113		9	5694.39	917.882	232	4351			9	6459.9	420.623	158	1537			9	5724.03	704.933	205	5689
	10	5807.99	1020.17	263	4705		10	6454.96	970.281	269	5455			10	8721.86	564.19	167	2557			10	7037.74	647.998	225	3640
	11	3244.77	1364.43	291	6183		11	5635.13	915.9	292	3380			11	4859.74	497.221	179	1570			11	7245.17	530.932	170	3730
	12	6771.05	671.365	198	3937		12	5072.11	844.899	309	4715			12	6667.33	475.184	153	2204			12	5131.38	646.278	191	3741
	13	4963.46	1016.02	252	6528		13	4696.76	615.391	202	3051			13	4548.6	560.35	197	2193			13	6291.98	780.032	212	8789
	14	6035.17	1079.64	200	7370		14	8435.41	593.142	199	3061			14	6771.05	448.593	202	1542			14	7205.66	720.09	241	4132
	15	5190.64	891.294	216	4526		15	6069.74	764.896	254	2968			15	5407.95	398.83	188	1015			15	8716.92	659.013	192	1972
	16	2948.44	1399.44	458	7510		16	5931.45	802.522	250	4391			16	175958	216.144	142	389			16	10238.1	649.416	187	5812
	17	5259.78	865.898	362	5884		17	5141.25	765.726	197	1820										17	6464.84	758.199	252	5330
	18	5882.07	798.836	258	4484		18	2824.97	822.984	354	2613										18	7985.98	795.531	204	4101
	19	6938.96	632.006	192	4645		19	82437.8	188.744	128	366										19	8099.57	572.646	198	2461
	20	5970.97	803.882	192	8454																20	7734.1	592.152	195	4413
	21	7442.72	678.337	192	3937																21	9699.73	538.718	205	3042
	22	6869.82	870.245	241	6528																22	5541.29	745.823	238	2917
	23	6045.05	715.821	213	5184																23	148212	193.502	128	1326
	24	120921	203.152	130	444

## Sheet: Sheet2
gcamp plain	Fluoresence Intentsity	BGC	Mean	Standard Dev		gcamp carbachol	Fluorescence	BGC	Mean	Standard Dev				gcamp edta	Fluoresence Intentsity	BGC	Mean	Standard Dev
1	489.162	295.66	454.932	196.212		1	1050.84	862.098	625.086	122.381				1	510.072	293.928	269.125	80.4485
2	593.539	400.037	454.932			2	735.312	546.568						2	593.386	377.242
3	642.389	448.887				3	860.9	672.156						3	382.919	166.775
4	649.756	456.254				4	953.574	764.83						4	590.63	374.486
5	752.609	559.107				5	702.181	513.437						5	580.236	364.092
6	620.286	426.784				6	708.701	519.957						6	495.62	279.476
7	666.158	472.656				7	751.435	562.691						7	397.585	181.441
8	509.886	316.384				8	872.373	683.629						8	363.589	147.445
9	704.933	511.431				9	917.882	729.138						9	420.623	204.479
10	647.998	454.496				10	970.281	781.537						10	564.19	348.046
11	530.932	337.43				11	915.9	727.156						11	497.221	281.077
12	646.278	452.776				12	844.899	656.155						12	475.184	259.04
13	780.032	586.53				13	615.391	426.647						13	560.35	344.206
14	720.09	526.588				14	593.142	404.398						14	448.593	232.449
15	659.013	465.511				15	764.896	576.152						15	398.83	182.686
16	649.416	455.914				16	802.522	613.778						16	216.144
17	758.199	564.697				17	765.726	576.982						17
18	795.531	602.029				18	822.984	634.24						18
	572.646	379.144					188.744							20
	592.152	398.65
	538.718	345.216
	745.823	552.321
	193.502
	plain	carbachol	EDTA
	0.649899	1.895	0.646092
	0.879334	1.20143	0.829227
	0.986712	1.47749	0.366593
	1.00291	1.6812	0.823169
	1.22899	1.1286	0.800322
	0.938127	1.14293	0.614325
	1.03896	1.23687	0.398831
	0.695454	1.50271	0.324103
	1.12419	1.60274	0.449472
	0.999042	1.71792	0.765051
	0.741715	1.59838	0.617844
	0.995261	1.44231	0.569404
	1.28927	0.937826	0.75661
	1.15751	0.88892	0.510953
	1.02325	1.26646	0.401568
	1.00216	1.34916
	1.24128	1.26828
	1.32334	1.39414
	0.833408
	0.876285
	0.75883
	1.21407

## Sheet: time course
	gcamp 1 no carb						gcamp1 carb 0min						gcamp1 carb 5min						gcamp1 carb 10min						gcamp1 carb 15min						gcamp1 carb 20min
	1	5670.64	455.27	198	1189		1	5613.93	374.903	150	1201		1	7630.16	739.827	162	8746		1	4199.42	1216.88	179	9771
	2	6155.79	716.302	226	4740		2	5881.71	521.387	183	2531		2	4303.39	454.664	154	1905		2	5925.82	444.38	138	4160
	3	7258.42	426.295	190	1144		3	4700.33	546.5	180	2742		3	5582.43	623.944	188	3922		3	5840.76	746.642	182	5602
	4	6395.22	617.755	216	1653		4	4728.68	589.508	199	3051		4	7658.51	1061.61	195	12576		4	6181	1264.3	228	13074
	5	6508.63	507.937	204	2540		5	4791.69	659.549	188	3218		5	6968.59	593.493	192	3742		5	4864.15	794.628	186	4366
	6	6530.69	485.098	220	2155		6	5897.47	477.654	186	2742		6	4561.71	856.544	322	5194		6	5900.61	1089.67	216	7204
	7	3878.09	655.105	208	1303		7	4561.71	768.138	182	3002		7	7677.42	618.662	173	5362		7	4366.39	1157.41	230	6493
	8	7248.97	538.049	193	2331		8	3947.39	415.974	168	1541		8	5995.13	587.082	176	3395		8	5585.58	680.336	192	5633
	9	10137.8	550.564	182	3872		9	6410.97	682.643	221	3529		9	6455.08	863.974	213	5680		9	4177.37	699.517	199	3825
	10	7185.96	605.104	189	5388		10	4161.62	646.377	186	2531		10	7507.3	808.442	211	5905		10	5856.51	1141.65	229	8317
	11	5963.62	718.281	223	2948		11	4287.63	1006.42	474	2110		11	6032.93	971.082	232	7755		11	4419.95	1307.86	239	9127
	12	5689.54	472.053	192	1963		12	4816.89	573.308	206	2726		12	4700.33	677.189	201	3922		12	6111.69	931.382	224	7971
	13	9104.53	412.763	161	970		13	5469.02	616.215	211	2455		13	6946.53	561.367	191	4028		13	4905.1	689.756	208	5451
	14	9057.27	377.322	154	953		14	4936.61	631.353	219	1720		14	6659.85	969.178	230	5864		14	3248.02	588.164	236	1602
	15	9885.82	343.606	149	1312		15	4864.15	592.674	178	3533		15	5440.66	1113.85	197	11210		15	4775.94	477.253	209	1343
	16	6231.4	627.648	200	1769		16	4435.7	561.139	273	2266		16	6278.66	684.771	193	6023		16	6240.85	572.057	175	3825
	17	5336.7	425.515	160	1009		17	5371.36	555.598	207	3085		17	5141.38	580.154	202	2928		17	5973.07	1059.46	219	7204
	18	7690.02	383.475	147	1107		18	3421.29	966.231	363	4980		18	4161.62	515.735	223	1591		18	5749.4	745.572	186	4366
	19	6773.26	479.04	176	3180		19	4920.85	760.629	207	3858		19	5153.98	899.533	210	4062		19	4325.44	709.093	272	3252
	20	8676.08	385.179	175	1714		20	3909.59	593.04	205	2726		20	68948.7	175.294	111	330		20	4987.01	682.28	197	4088
	21	6814.22	492.897	203	1653		21	5793.5	595.298	211	2455								21	37366.4	178.173	115	354
	22	72083.3	177.533	101	328		22	5613.93	634.102	170	3218
							23	5141.38	760.722	207	3858
							24	5484.77	481.797	176	2742
							25	6363.72	574.979	206	3051
							26	46735.5	182.349	122	359
	gcamp2 no edta						gcamp2 edta 0min						gcamp2 edta 5min						gcamp2 edta 10min						gcamp2 edta 15min						gcamp2 edta 20min
	1	9583.38	481.164	154	2877		1	10159.9	322.318	139	998		1	7541.95	328.239	131	1091		1	6952.83	554.146	149	3441
	2	8143.67	452.673	147	2596		2	11776	422.316	140	2915		2	9073.02	389.811	132	2566		2	5878.56	421.75	160	1445
	3	7759.32	355.232	146	1452		3	8424.05	392.434	170	1071		3	6987.49	392.572	165	984		3	6644.1	299.48	144	788
	4	6552.74	335.27	146	1126		4	10027.6	355.723	154	1691		4	7724.67	438.807	163	2305		4	6625.2	381.596	155	1651
	5	4596.37	406.756	152	1727		5	9463.67	443.438	156	3719		5	9589.68	711.132	170	5726		5	6382.62	443.73	154	3423
	6	7765.63	531.129	175	2877		6	11338.1	700.801	142	7125		6	6792.17	436.187	197	857		6	6668.25	557.873	172	2942
	7	5012.22	507.669	200	1196		7	8386.25	832.814	193	5591		7	7204.86	353.524	174	1280		7	6146.34	433.138	181	1007
	8	7097.75	751.166	183	4721		8	8669.78	430.862	194	1090		8	10657.7	354.302	180	834		8	6811.07	624.093	180	3604
	9	6990.64	424.825	183	1238		9	9778.7	341.915	167	713		9	10181.9	413.496	162	978		9	4829.49	526.141	206	1325
	10	5005.91	599.643	215	1176		10	9262.04	506.344	172	1716		10	8206.67	359.275	167	1158		10	5437.51	288.616	154	1143
	11	5371.36	464.147	181	2502		11	9888.97	399.038	156	1026		11	7853.84	362.52	148	2333		11	4029.3	459.696	266	1133
	12	7330.88	426.003	164	1586		12	76314.2	212.462	150	981		12	6492.88	370.113	147	1260		12	5957.32	489.073	201	1249
	13	5169.73	479.779	194	1272								13	90342.7	169.927	109	367		13	4249.83	475.575	256	1338
	14	6886.68	360.705	187	834														14	90345.9	171.833	101	1305
	15	3389.78	615.674	199	1106
	16	74984.8	176.936	115	319

## Sheet: carb time course 
gcamp plain	Fluoresence Intentsity	BGC	Mean	Standard Dev		carb 0min	Fluorescence	BGC	Mean	Standard Dev				5min	Fluoresence Intentsity	BGC	Mean	Standard Dev		10min	Fluoresence Intentsity	BGC	Mean	Standard Dev		15min	Fluoresence Intentsity	BGC	Mean	Standard Dev		20min	Fluoresence Intentsity	BGC	Mean	Standard Dev
1	455.27	277.737	330.813	166.102		1	374.903	192.554	443.498	149.059				1	739.827	564.533	571.079	193.884			1216.88	1038.7	671.742	276.167				0	#DIV/0!	0				0	#DIV/0!	0
2	716.302	538.769	330.813			2	521.387	339.038						2	454.664	279.37					444.38	266.207						0						0
3	426.295	248.762				3	546.5	364.151						3	623.944	448.65					746.642	568.469						0						0
4	617.755	440.222				4	589.508	407.159						4	1061.61	886.314					1264.3	1086.12						0						0
5	507.937	330.404				5	659.549	477.2						5	593.493	418.199					794.628	616.455						0						0
6	485.098	307.565				6	477.654	295.305						6	856.544	681.25					1089.67	911.496						0						0
7	655.105	477.572				7	768.138	585.789						7	618.662	443.368					1157.41	979.242						0						0
8	538.049	360.516				8	415.974	233.625						8	587.082	411.788					680.336	502.163						0						0
9	550.564	373.031				9	682.643	500.294						9	863.974	688.68					699.517	521.344						0						0
10	605.104	427.571				10	646.377	464.028						10	808.442	633.148					1141.65	963.482						0						0
11	718.281	540.748				11	1006.42	824.075						11	971.082	795.788					1307.86	1129.68						0						0
12	472.053	294.52				12	573.308	390.959						12	677.189	501.895					931.382	753.209						0						0
13	412.763	235.23				13	616.215	433.866						13	561.367	386.073					689.756	511.583						0						0
14	377.322	199.789				14	631.353	449.004						14	969.178	793.884					588.164	409.991						0						0
15	343.606	166.073				15	592.674	410.325						15	1113.85	938.552					477.253	299.08						0						0
16	627.648	450.115				16	561.139	378.79						16	684.771	509.477					572.057	393.884						0						0
17	425.515	247.982				17	555.598	373.249						17	580.154	404.86					1059.46	881.289						0						0
18	383.475	205.942				18	966.231	783.882						18	515.735	340.441					745.572	567.399						0						0
	479.04	301.507					760.629	578.28						20	899.533	724.239					709.093	530.92						0						0
	385.179	207.646					593.04	410.691							175.294						682.28	504.107						0						0
	492.897	315.364					595.298	412.949													178.173							0
	177.533						634.102	451.753																				0
							760.722	578.373																				0
							481.797	299.448
							574.979	392.63
							182.349
	0min	30sec	5min	10min
	0.83956	0.582064	1.7065	3.13986
	1.62862	1.02486	0.844496	0.804706
	0.751973	1.10078	1.35621	1.7184
	1.33073	1.23078	2.6792	3.2832
	0.998765	1.44251	1.26416	1.86346
	0.929726	0.892665	2.05932	2.75532
	1.44363	1.77076	1.34024	2.96011
	1.08979	0.706216	1.24478	1.51797
	1.12762	1.51232	2.08178	1.57595
	1.29249	1.40269	1.91392	2.91247
	1.63461	2.49106	2.40556	3.41487
	0.890293	1.18181	1.51716	2.27684
	0.711067	1.31152	1.16704	1.54644
	0.603934	1.35728	2.3998	1.23935
	0.502015	1.24035	2.83711	0.904077
	1.36063	1.14503	1.54008	1.19066
	0.749615	1.12828	1.22383	2.66401
	0.622534	2.36956	1.02911	1.71517
	0.911413	1.74806	2.18927	1.6049
	0.627685	1.24146		1.52384
	0.953301	1.24829
		1.36559
		1.74834
		0.905189
		1.18687

## Sheet: edta time course
gcamp plain	Fluoresence Intentsity	BGC	Mean	Standard Dev		edta 0min	Fluorescence	BGC	Mean	Standard Dev				5min	Fluoresence Intentsity	BGC	Mean	Standard Dev		10min	Fluoresence Intentsity	BGC	Mean	Standard Dev		15min	Fluoresence Intentsity	BGC	Mean	Standard Dev		20min	Fluoresence Intentsity	BGC	Mean	Standard Dev
1	481.164	304.228	302.52	164.57		1	322.318	109.856	255.538	159.065				1	328.239	158.312	239.238	101.043			554.146	382.313	286.237	97.6895				0	#DIV/0!	0				0	#DIV/0!	0
2	452.673	275.737	302.52			2	422.316	209.854						2	389.811	219.884					421.75	249.917						0						0
3	355.232	178.296				3	392.434	179.972						3	392.572	222.645					299.48	127.647						0						0
4	335.27	158.334				4	355.723	143.261						4	438.807	268.88					381.596	209.763						0						0
5	406.756	229.82				5	443.438	230.976						5	711.132	541.205					443.73	271.897						0						0
6	531.129	354.193				6	700.801	488.339						6	436.187	266.26					557.873	386.04						0						0
7	507.669	330.733				7	832.814	620.352						7	353.524	183.597					433.138	261.305						0						0
8	751.166	574.23				8	430.862	218.4						8	354.302	184.375					624.093	452.26						0						0
9	424.825	247.889				9	341.915	129.453						9	413.496	243.569					526.141	354.308						0						0
10	599.643	422.707				10	506.344	293.882						10	359.275	189.348					288.616	116.783						0						0
11	464.147	287.211				11	399.038	186.576						11	362.52	192.593					459.696	287.863						0						0
12	426.003	249.067				12	212.462							12	370.113	200.186					489.073	317.24						0						0
13	479.779	302.843				13								13	169.927						475.575	303.742						0						0
14	360.705	183.769				14								14							171.833							0						0
15	615.674	438.738				15								15														0						0
16	176.936					16								16														0						0
17						17								17														0
18						18								18														0
														20
	0min	30sec	5min	10min
	1.00565	0.363137	0.523311	1.26376
	0.911468	0.693687	0.726842	0.826118
	0.58937	0.59491	0.735969	0.421946
	0.523384	0.473559	0.888802	0.693386
	0.759686	0.763507	1.78899	0.898775
	1.17081	1.61424	0.880141	1.27608
	1.09326	2.05062	0.606893	0.863762
	1.89816	0.721937	0.609465	1.49498
	0.819414	0.427916	0.805134	1.17119
	1.39729	0.971448	0.625903	0.386034
	0.949396	0.61674	0.63663	0.951551
	0.823308		0.661729	1.04866
	1.00107			1.00404
	0.607461
	1.45028
