# Supplementary material for: fmo-4 promotes longevity and stress resistance via ER to mitochondria calcium regulation in C. elegans
Source: eLife journal article supplement (doi:10.7554/elife.99971), 2024-08-27
Supplement: fig5-figsupp1-data1 [file elife-99971-fig5-figsupp1-data1-v1.zip]

## Sheet: Sheet1
	gcamp7f plain 2						carbachol							edta							gcanp plain 1
	1	4815.29	971.971	192	7965		1	2913.87	1050.84	247	3483			1	4025.09	510.072	167	2204			1	8494.67	489.162	182	2047
	2	3901.62	927.52	235	5638		2	3536.16	735.312	199	2344			2	4528.85	593.386	161	3458			2	7329.12	593.539	192	2509
	3	3086.73	953.479	234	5197		3	3017.58	860.9	220	2836			3	7664.96	382.919	157	3287			3	8297.12	642.389	181	4457
	4	6079.62	709.467	184	2826		4	5007.91	953.574	288	3380			4	5605.5	590.63	216	2127			4	7131.57	649.756	200	3411
	5	3610.24	1095.81	219	7965		5	8504.55	702.181	205	3316			5	3906.56	580.236	184	3617			5	6958.72	752.609	216	2991
	6	4385.62	1126.2	230	3279		6	6114.19	708.701	222	3458			6	5684.52	495.62	182	1628			6	7511.86	620.286	230	2481
	7	3244.77	885.963	394	5862		7	6331.49	751.435	236	4264			7	7101.94	397.585	148	2106			7	5393.13	666.158	216	3056
	8	3891.75	1118.63	274	5467		8	5822.8	872.373	290	4963			8	6005.54	363.589	144	1546			8	7655.08	509.886	192	3222
	9	2439.75	1075.3	291	4113		9	5694.39	917.882	232	4351			9	6459.9	420.623	158	1537			9	5724.03	704.933	205	5689
	10	5807.99	1020.17	263	4705		10	6454.96	970.281	269	5455			10	8721.86	564.19	167	2557			10	7037.74	647.998	225	3640
	11	3244.77	1364.43	291	6183		11	5635.13	915.9	292	3380			11	4859.74	497.221	179	1570			11	7245.17	530.932	170	3730
	12	6771.05	671.365	198	3937		12	5072.11	844.899	309	4715			12	6667.33	475.184	153	2204			12	5131.38	646.278	191	3741
	13	4963.46	1016.02	252	6528		13	4696.76	615.391	202	3051			13	4548.6	560.35	197	2193			13	6291.98	780.032	212	8789
	14	6035.17	1079.64	200	7370		14	8435.41	593.142	199	3061			14	6771.05	448.593	202	1542			14	7205.66	720.09	241	4132
	15	5190.64	891.294	216	4526		15	6069.74	764.896	254	2968			15	5407.95	398.83	188	1015			15	8716.92	659.013	192	1972
	16	2948.44	1399.44	458	7510		16	5931.45	802.522	250	4391			16	175958	216.144	142	389			16	10238.1	649.416	187	5812
	17	5259.78	865.898	362	5884		17	5141.25	765.726	197	1820										17	6464.84	758.199	252	5330
	18	5882.07	798.836	258	4484		18	2824.97	822.984	354	2613										18	7985.98	795.531	204	4101
	19	6938.96	632.006	192	4645		19	82437.8	188.744	128	366										19	8099.57	572.646	198	2461
	20	5970.97	803.882	192	8454																20	7734.1	592.152	195	4413
	21	7442.72	678.337	192	3937																21	9699.73	538.718	205	3042
	22	6869.82	870.245	241	6528																22	5541.29	745.823	238	2917
	23	6045.05	715.821	213	5184																23	148212	193.502	128	1326
	24	120921	203.152	130	444

## Sheet: Sheet2
gcamp plain	Fluoresence Intentsity	BGC	Mean	Standard Dev		gcamp carbachol	Fluorescence	BGC	Mean	Standard Dev				gcamp edta	Fluoresence Intentsity	BGC	Mean	Standard Dev
1	489.162	295.66	454.932	196.212		1	1050.84	862.098	625.086	122.381				1	510.072	293.928	269.125	80.4485
2	593.539	400.037	454.932			2	735.312	546.568						2	593.386	377.242
3	642.389	448.887				3	860.9	672.156						3	382.919	166.775
4	649.756	456.254				4	953.574	764.83						4	590.63	374.486
5	752.609	559.107				5	702.181	513.437						5	580.236	364.092
6	620.286	426.784				6	708.701	519.957						6	495.62	279.476
7	666.158	472.656				7	751.435	562.691						7	397.585	181.441
8	509.886	316.384				8	872.373	683.629						8	363.589	147.445
9	704.933	511.431				9	917.882	729.138						9	420.623	204.479
10	647.998	454.496				10	970.281	781.537						10	564.19	348.046
11	530.932	337.43				11	915.9	727.156						11	497.221	281.077
12	646.278	452.776				12	844.899	656.155						12	475.184	259.04
13	780.032	586.53				13	615.391	426.647						13	560.35	344.206
14	720.09	526.588				14	593.142	404.398						14	448.593	232.449
15	659.013	465.511				15	764.896	576.152						15	398.83	182.686
16	649.416	455.914				16	802.522	613.778						16	216.144
17	758.199	564.697				17	765.726	576.982						17
18	795.531	602.029				18	822.984	634.24						18
	572.646	379.144					188.744							20
	592.152	398.65
	538.718	345.216
	745.823	552.321
	193.502
	plain	carbachol	EDTA
	0.649899	1.895	0.646092
	0.879334	1.20143	0.829227
	0.986712	1.47749	0.366593
	1.00291	1.6812	0.823169
	1.22899	1.1286	0.800322
	0.938127	1.14293	0.614325
	1.03896	1.23687	0.398831
	0.695454	1.50271	0.324103
	1.12419	1.60274	0.449472
	0.999042	1.71792	0.765051
	0.741715	1.59838	0.617844
	0.995261	1.44231	0.569404
	1.28927	0.937826	0.75661
	1.15751	0.88892	0.510953
	1.02325	1.26646	0.401568
	1.00216	1.34916
	1.24128	1.26828
	1.32334	1.39414
	0.833408
	0.876285
	0.75883
	1.21407

## Sheet: time course
	gcamp 1 no carb						gcamp1 carb 0min						gcamp1 carb 5min						gcamp1 carb 10min						gcamp1 carb 15min						gcamp1 carb 20min
	1	8494.67	489.162	182	2047		1	4938.76	634.418	209	2387		1	6400.64	569.483	181	8327		1	3921.38	906.965	182	6700		1	6336.43	589.83	163	1883		1	6321.62	762.849	165	2137
	2	7329.12	593.539	192	2509		2	7442.72	535.387	214	2781		2	6904.39	523.956	191	2356		2	5081.99	738.855	293	3066		2	7477.29	604.133	176	2064		2	5462.27	633.471	184	2049
	3	8297.12	642.389	181	4457		3	6326.56	640.692	208	6184		3	5294.35	730.448	236	4325		3	4094.24	827.423	253	4961		3	6272.23	718.472	201	2959		3	3901.62	598.691	167	1423
	4	7131.57	649.756	200	3411		4	4632.56	766.215	302	3417		4	4336.23	521.817	191	1939		4	4276.97	721.597	213	2180		4	11043.1	944.436	223	4878		4	4849.87	997.499	391	1708
	5	6958.72	752.609	216	2991		5	4316.48	784.737	275	2544		5	7230.35	589.56	216	4418		5	4444.89	814.693	259	4705		5	3639.87	787.467	270	1922		5	4588.11	845.47	365	2285
	6	7511.86	620.286	230	2481		6	2785.46	978.874	367	3810		6	4978.27	629.59	231	4319		6	4444.89	804.827	223	4322		6	5027.66	784.063	324	3194		6	4237.46	1086.76	450	1751
	7	5393.13	666.158	216	3056		7	6133.94	1055.67	247	4222		7	4484.4	752.366	252	5301		7	4064.6	870.893	245	6230		7	7684.72	752.093	190	3626		7	7171.08	558.006	181	1913
	8	7655.08	509.886	192	3222		8	2948.44	911.968	299	3370		8	5442.52	682.668	223	2904		8	4148.56	899.381	223	4713		8	6227.78	773.668	251	2986		8	5274.6	930.564	284	1689
	9	5724.03	704.933	205	5689		9	3975.7	1027.28	384	3328		9	5091.86	979.139	246	8061		9	4800.48	807.517	313	4773		9	6114.19	823.6	230	2739		9	4484.4	426.103	200	842
	10	7037.74	647.998	225	3640		10	7141.45	670.562	239	2695		10	9077.45	610.478	228	4325		10	6020.35	907.024	195	5138		10	10030.6	744.429	208	2476		10	5205.46	529.703	204	1120
	11	7245.17	530.932	170	3730		11	3239.83	600.748	195	2756		11	5496.84	662.42	228	4840		11	6341.37	578.472	177	2925		11	3753.46	647.132	263	1524		11	5546.23	1033.98	233	2712
	12	5131.38	646.278	191	3741		12	5496.84	644.141	224	2965		12	6904.39	600.9	190	3171		12	4504.15	696.871	226	3373		12	5407.95	700.255	197	1462		12	7630.39	748.54	183	2553
	13	6291.98	780.032	212	8789		13	6045.05	660.361	209	3563		13	5279.54	639.7	177	3446		13	5333.86	761.663	210	3836		13	5936.39	603.762	181	1365		13	7003.17	984.291	202	2554
	14	7205.66	720.09	241	4132		14	4178.19	862.688	263	2255		14	6217.9	465.226	165	2435		14	4183.13	878.116	259	5426		14	7467.41	475.778	183	1644		14	5126.44	675.379	235	1508
	15	8716.92	659.013	192	1972		15	5141.25	675.51	235	3006		15	8524.31	522.499	193	4787		15	7022.92	614.371	183	3507		15	6879.7	617.651	232	1759		15	6104.31	833.258	249	1896
	16	10238.1	649.416	187	5812		16	6114.19	824.284	269	3810		16	5743.78	594.899	236	3191		16	4123.87	790.341	316	2949		16	6371.01	837.857	285	1453		16	7645.21	741.805	177	4302
	17	6464.84	758.199	252	5330		17	4602.93	815.84	398	3417		17	7037.74	629.206	210	2069		17	4746.15	901.983	221	5884		17	8711.98	726.858	221	2476		17	7388.39	802.866	236	1998
	18	7985.98	795.531	204	4101		18	3827.54	855.65	309	2544		18	5126.44	620.923	225	4148		18	7398.27	628.436	199	5213		18	5911.7	478.659	188	1329		18	6227.78	592.342	246	1335
	19	8099.57	572.646	198	2461		19	4716.52	825.218	267	3466		19	5719.09	681.962	232	5301		19	4079.42	720.282	307	4713		19	9052.75	615.047	216	2795		19	5496.84	917.069	202	1804
	20	7734.1	592.152	195	4413		20	2592.85	813.428	340	3397		20	3970.77	714.324	226	4840		20	4963.46	824.652	212	4362		20	4583.17	645.447	251	1951		20	4746.15	1216.55	599	4341
	21	9699.73	538.718	205	3042		21	4622.68	767.391	221	5219		21	4113.99	630.368	199	2007		21	6084.56	878.659	343	3854		21	7289.61	651.57	336	1651		21	106914	196.196	125	418
	22	5541.29	745.823	238	2917		22	55906.8	235.011	166	457		22	4469.58	665.562	220	4148		22	6005.54	878.341	218	5138		22	9294.75	844.776	370	3220
	23	148212	193.502	128	1326								23	59472.6	197.178	132	300		23	74906.2	194.215	118	368		23	6445.09	776.237	354	2086
																									24	103423	190.282	128	353
	gcamp2 no edta						gcamp2 edta 0min						gcamp2 edta 5min						gcamp2 edta 10min						gcamp2 edta 15min						gcamp2 edta 20min
	1	4815.29	971.971	192	7965		1	6924.15	565.045	190	2247		1	6138.88	284.027	131	1855		1	1545.83	501.738	159	1643		1	6958.72	514.116	160	1043		1	4380.68	528.848	185	1441
	2	3901.62	927.52	235	5638		2	7373.57	417.805	159	3018		2	9610.83	431.452	155	1812		2	3970.77	338.376	161	1173		2	5575.86	507.377	183	1427		2	5561.05	507.108	194	1356
	3	3086.73	953.479	234	5197		3	6514.23	684.939	190	7210		3	4094.24	576.151	190	1866		3	3402.81	291.83	152	1000		3	6405.58	490.206	152	1446		3	6331.49	534.51	158	2446
	4	6079.62	709.467	184	2826		4	5877.13	639.551	187	1898		4	5630.19	778.485	163	2537		4	6721.66	415.108	156	1707		4	5240.03	589.303	191	1389		4	6701.9	483.256	163	1297
	5	3610.24	1095.81	219	7965		5	5733.9	579.949	190	2247		5	8400.84	592.719	181	1752		5	4899.25	527.253	184	1436		5	4306.6	532.165	187	1074		5	9778.75	498.568	158	1350
	6	4385.62	1126.2	230	3279		6	6316.68	622.477	186	2695		6	10233.1	442.392	179	1750		6	6617.94	346.369	172	1227		6	5659.82	409.981	166	1104		6	5146.19	677.032	199	1479
	7	3244.77	885.963	394	5862		7	6993.29	648.565	212	2498		7	6371.01	457.772	154	1812		7	8381.08	476.727	188	1220		7	4346.11	450.839	199	1084		7	5975.9	454.166	198	1086
	8	3891.75	1118.63	274	5467		8	7472.35	1069.2	197	2481		8	5966.03	482.301	190	1767		8	6094.43	449.685	209	1086		8	5373.38	628.197	184	1506		8	3684.32	692.084	196	2181
	9	2439.75	1075.3	291	4113		9	6968.6	864.264	186	5540		9	5067.17	627.425	186	2457		9	5195.58	400.419	195	845		9	3605.3	542.546	228	964		9	5758.6	495.387	210	1286
	10	5807.99	1020.17	263	4705		10	9477.49	565.45	178	4068		10	6124.07	430.46	164	1722		10	5225.21	633.339	191	1923		10	6593.25	655.881	201	1334		10	3585.54	560.22	212	1147
	11	3244.77	1364.43	291	6183		11	8578.63	577.397	179	3007		11	3773.22	425.68	174	1786		11	6040.11	394.684	181	1178		11	2785.46	472.884	192	998		11	4533.78	560.975	217	1185
	12	6771.05	671.365	198	3937		12	5901.82	807.585	198	3884		12	3190.44	499.411	206	1480		12	6543.86	396.529	169	1414		12	4415.25	373.124	204	874		12	5091.86	673.566	233	1152
	13	4963.46	1016.02	252	6528		13	6450.02	674.662	186	2857		13	3002.77	600.572	234	1622		13	3516.4	355.934	179	1983		13	3881.87	448.648	195	1128		13	4281.91	591.526	192	1091
	14	6035.17	1079.64	200	7370		14	8074.88	848.453	221	3739		14	4923.95	380.361	180	1191		14	3062.03	471.031	190	895		14	5684.52	425.16	173	1220		14	6459.9	479.91	189	943
	15	5190.64	891.294	216	4526		15	4756.03	681.361	215	3240		15	4652.31	534.829	190	1136		15	4914.07	461.964	193	1152		15	8094.63	389.623	180	982		15	5551.17	425.212	195	977
	16	2948.44	1399.44	458	7510		16	6919.21	730.568	209	4375		16	6277.17	495.331	149	1667		16	3521.34	637.369	244	1387		16	4355.99	398.48	187	1173		16	4774.14	503.76	204	1094
	17	5259.78	865.898	362	5884		17	210574	216.44	146	458		17	5709.21	515.069	190	1767		17	5803.05	537.872	188	1121		17	6114.19	530.041	190	1118		17	166664	194.182	123	328
	18	5882.07	798.836	258	4484								18	146370	202.556	125	354		18	193145	200.073	132	460		18	5541.29	501.436	211	943
	19	6938.96	632.006	192	4645																				19	153507	194.333	131	405
	20	5970.97	803.882	192	8454
	21	7442.72	678.337	192	3937
	22	6869.82	870.245	241	6528
	23	6045.05	715.821	213	5184
	24	120921	203.152	130	444

## Sheet: carb time course 
gcamp plain	Fluoresence Intentsity	BGC	Mean	Standard Dev		carb 0min	Fluorescence	BGC	Mean	Standard Dev				5min	Fluoresence Intentsity	BGC	Mean	Standard Dev		10min	Fluoresence Intentsity	BGC	Mean	Standard Dev		15min	Fluoresence Intentsity	BGC	Mean	Standard Dev		20min	Fluoresence Intentsity	BGC	Mean	Standard Dev
1	489.162	295.66	454.932	196.399		1	634.418	399.407	543.611	141.711				1	569.483	372.305	439.981	111.306			906.965	712.75	599.029	103.014			589.83	399.548	680.563	121.628			762.849	566.653	767.209	188.03
2	593.539	400.037	454.932			2	535.387	300.376						2	523.956	326.778					738.855	544.64					604.133	413.851					633.471	437.275
3	642.389	448.887				3	640.692	405.681						3	730.448	533.27					827.423	633.208					718.472	528.19					598.691	402.495
4	649.756	456.254				4	766.215	531.204						4	521.817	324.639					721.597	527.382					944.436	754.154					997.499	801.303
5	752.609	559.107				5	784.737	549.726						5	589.56	392.382					814.693	620.478					787.467	597.185					845.47	649.274
6	620.286	426.784				6	978.874	743.863						6	629.59	432.412					804.827	610.612					784.063	593.781					1086.76	890.56
7	666.158	472.656				7	1055.67	820.663						7	752.366	555.188					870.893	676.678					752.093	561.811					558.006	361.81
8	509.886	316.384				8	911.968	676.957						8	682.668	485.49					899.381	705.166					773.668	583.386					930.564	734.368
9	704.933	511.431				9	1027.28	792.267						9	979.139	781.961					807.517	613.302					823.6	633.318					426.103	229.907
10	647.998	454.496				10	670.562	435.551						10	610.478	413.3					907.024	712.809					744.429	554.147					529.703	333.507
11	530.932	337.43				11	600.748	365.737						11	662.42	465.242					578.472	384.257					647.132	456.85					1033.98	837.782
12	646.278	452.776				12	644.141	409.13						12	600.9	403.722					696.871	502.656					700.255	509.973					748.54	552.344
13	780.032	586.53				13	660.361	425.35						13	639.7	442.522					761.663	567.448					603.762	413.48					984.291	788.095
14	720.09	526.588				14	862.688	627.677						14	465.226	268.048					878.116	683.901					475.778	285.496					675.379	479.183
15	659.013	465.511				15	675.51	440.499						15	522.499	325.321					614.371	420.156					617.651	427.369					833.258	637.062
16	649.416	455.914				16	824.284	589.273						16	594.899	397.721					790.341	596.126					837.857	647.575					741.805	545.609
17	758.199	564.697				17	815.84	580.829						17	629.206	432.028					901.983	707.768					726.858	536.576					802.866	606.67
18	795.531	602.029				18	855.65	620.639						18	620.923	423.745					628.436	434.221					478.659	288.377					592.342	396.146
	572.646	379.144					825.218	590.207						20	681.962	484.784					720.282	526.067					615.047	424.765					917.069	720.873
	592.152	398.65					813.428	578.417							714.324	517.146					824.652	630.437					645.447	455.165					1216.55	1020.35
	538.718	345.216					767.391	532.38							630.368	433.19					878.659	684.444					651.57	461.288					196.196
	745.823	552.321					235.011								665.562	468.384					878.341	684.126					844.776	654.494
	193.502														197.178						194.215						776.237	585.955
																											190.282
	0min	30sec	5min	10min	15min	20min
	0.649899	0.877949	0.818375	1.56672	0.878259	1.24558
	0.879334	0.660266	0.718301	1.19719	0.909699	0.961188
	0.986712	0.89174	1.1722	1.39187	1.16103	0.884737
	1.00291	1.16766	0.713599	1.15925	1.65773	1.76137
	1.22899	1.20837	0.862507	1.36389	1.31269	1.42719
	0.938127	1.63511	0.950498	1.34221	1.30521	1.95757
	1.03896	1.80392	1.22038	1.48743	1.23493	0.795306
	0.695454	1.48804	1.06717	1.55005	1.28236	1.61424
	1.12419	1.74151	1.71885	1.34812	1.39212	0.505366
	0.999042	0.957398	0.908488	1.56685	1.21809	0.733092
	0.741715	0.803938	1.02266	0.844647	1.00422	1.84155
	0.995261	0.899321	0.887434	1.1049	1.12099	1.21412
	1.28927	0.934975	0.972721	1.24733	0.908883	1.73234
	1.15751	1.37972	0.589205	1.5033	0.627558	1.05331
	1.02325	0.968275	0.715098	0.923558	0.939413	1.40035
	1.00216	1.2953	0.874243	1.31036	1.42345	1.19932
	1.24128	1.27674	0.949654	1.55577	1.17946	1.33354
	1.32334	1.36425	0.931447	0.954475	0.63389	0.870781
	0.833408	1.29735	1.06562	1.15636	0.933689	1.58457
	0.876285	1.27144	1.13675	1.38578	1.00051	2.24287
	0.75883	1.17024	0.952208	1.5045	1.01397
	1.21407		1.02957	1.5038	1.43866
					1.28801

## Sheet: edta time course
gcamp plain	Fluoresence Intentsity	BGC	Mean	Standard Dev		edta 0min	Fluorescence	BGC	Mean	Standard Dev				5min	Fluoresence Intentsity	BGC	Mean	Standard Dev		10min	Fluoresence Intentsity	BGC	Mean	Standard Dev		15min	Fluoresence Intentsity	BGC	Mean	Standard Dev		20min	Fluoresence Intentsity	BGC	Mean	Standard Dev
1	971.971	768.819	739.097	342.483		1	565.045	348.605	469.639	153.548				1	284.027	81.471	300.646	112.088			501.738	301.665	249.117	97.7994			514.116	319.783	476.544	80.3664			528.848	334.666	521.195	80.349
2	927.52	724.368	739.097			2	417.805	201.365						2	431.452	228.896					338.376	138.303					507.377	313.044					507.108	312.926
3	953.479	750.327				3	684.939	468.499						3	576.151	373.595					291.83	91.757					490.206	295.873					534.51	340.328
4	709.467	506.315				4	639.551	423.111						4	778.485	575.929					415.108	215.035					589.303	394.97					483.256	289.074
5	1095.81	892.656				5	579.949	363.509						5	592.719	390.163					527.253	327.18					532.165	337.832					498.568	304.386
6	1126.2	923.047				6	622.477	406.037						6	442.392	239.836					346.369	146.296					409.981	215.648					677.032	482.85
7	885.963	682.811				7	648.565	432.125						7	457.772	255.216					476.727	276.654					450.839	256.506					454.166	259.984
8	1118.63	915.48				8	1069.2	852.758						8	482.301	279.745					449.685	249.612					628.197	433.864					692.084	497.902
9	1075.3	872.145				9	864.264	647.824						9	627.425	424.869					400.419	200.346					542.546	348.213					495.387	301.205
10	1020.17	817.018				10	565.45	349.01						10	430.46	227.904					633.339	433.266					655.881	461.548					560.22	366.038
11	1364.43	1161.28				11	577.397	360.957						11	425.68	223.124					394.684	194.611					472.884	278.551					560.975	366.793
12	671.365	468.213				12	807.585	591.145						12	499.411	296.855					396.529	196.456					373.124	178.791					673.566	479.384
13	1016.02	812.866				13	674.662	458.222						13	600.572	398.016					355.934	155.861					448.648	254.315					591.526	397.344
14	1079.64	876.493				14	848.453	632.013						14	380.361	177.805					471.031	270.958					425.16	230.827					479.91	285.728
15	891.294	688.142				15	681.361	464.921						15	534.829	332.273					461.964	261.891					389.623	195.29					425.212	231.03
16	1399.44	1196.29				16	730.568	514.128						16	495.331	292.775					637.369	437.296					398.48	204.147					503.76	309.578
17	865.898	662.746				17	216.44							17	515.069	312.513					537.872	337.799					530.041	335.708					194.182
18	798.836	595.684				18								18	202.556						200.073						501.436	307.103
	632.006	428.854												20													194.333
	803.882	600.73
	678.337	475.185
	870.245	667.093
	715.821	512.669
	203.152
	0min	30sec	5min	10min	15min	20min
	1.04021	0.471663	0.11023	0.408153	0.432667	0.452804
	0.980072	0.272447	0.309697	0.187124	0.423549	0.42339
	1.01519	0.63388	0.505475	0.124147	0.400317	0.460465
	0.685045	0.57247	0.779233	0.290943	0.534395	0.391118
	1.20777	0.491828	0.527891	0.442675	0.457087	0.411835
	1.24888	0.549369	0.324499	0.197939	0.291772	0.653297
	0.923845	0.584666	0.345308	0.374313	0.347053	0.351759
	1.23865	1.15378	0.378496	0.337726	0.587019	0.673663
	1.18001	0.876507	0.574849	0.271069	0.471133	0.407531
	1.10543	0.472211	0.308355	0.58621	0.624475	0.49525
	1.57122	0.488376	0.301887	0.263309	0.37688	0.496272
	0.633493	0.79982	0.401645	0.265805	0.241905	0.648608
	1.09981	0.619975	0.538517	0.21088	0.344089	0.537607
	1.1859	0.855115	0.240571	0.366607	0.312309	0.386591
	0.931058	0.629039	0.449566	0.354339	0.264228	0.312584
	1.61858	0.695616	0.396125	0.591662	0.276211	0.41886
	0.896697		0.422831	0.457043	0.454214
	0.805962				0.415511
	0.58024
	0.812789
	0.642926
	0.902578
	0.693642
