# Supplementary material for: fmo-4 promotes longevity and stress resistance via ER to mitochondria calcium regulation in C. elegans
Source: eLife journal article supplement (doi:10.7554/elife.99971), 2024-08-27
Supplement: fig5-figsupp1-data1 [file GCAMP7 13sept24 testing agar carb edta.xlsx]

## Sheet: Sheet1
	gcamp7f plain						carbachol							edta
	1	59243.1	670.424	207	3886		1	57847.2	966.444	243	8246			1	21892.2	1396.63	246	7623
	2	65075.9	640.438	216	4810		2	40812.1	962.225	423	8945			2	33082.8	1038.36	181	5547
	3	52287.3	709.851	276	2573		3	41986.1	894.781	266	5904			3	27591.6	729.236	206	3304
	4	52628.9	728.521	245	3289		4	53557.5	954.319	212	14871			4	23865.3	1508.25	202	6080
	5	56402.3	956.669	226	4808		5	61962.2	857.573	272	7673			5	27831.1	922.585	199	4349
	6	56461.2	780.703	198	5645		6	61799.3	899.673	317	6388			6	30251.8	1249.13	290	5006
	7	57912	727.184	238	6231		7	38224.5	920.222	202	9758			7	26698.3	1372.67	336	4743
	8	44905.5	767.09	250	8242		8	44830.9	848.11	218	8904			8	38678	1123.38	210	5936
	9	46955.1	773.249	265	8924		9	51578.6	798.303	192	10239			9	38870.4	1178.11	197	6582
	10	53170.8	736.04	208	5301		10	47987.8	756.46	194	7600			10	34859.5	799.38	151	8587
	11	56384.6	709.759	228	5869		11	39292.5	689.959	153	8246			11	42743.9	1023.89	226	7266
	12	62441.2	795.65	187	6991		12	49581.9	746.39	206	7915			12	82466.4	320.423	228	526
	13	54794.4	803.542	200	6174		13	43462.5	895.528	219	5622
	14	54737.4	738.801	171	3939		14	60894.2	865.526	302	7673
	15	58791.6	751.261	174	6975		15	59311.8	834.761	226	5633
	16	47078.8	749.498	177	6698		16	51504	841.956	266	5904
	17	50247.5	650.635	180	4282		17	30795.6	182.144	115	306
	18	55263.6	661.889	176	4824
	19	43692.2	570.304	172	2108
	20	38134.2	542.226	177	3334
	21	55183.1	778.841	200	5772
	22	52723.1	719.506	178	6305
	23	81604.6	242.843	168	1358

## Sheet: Sheet2
gcamp plain	Fluoresence Intentsity	BGC	Mean	Standard Dev		gcamp carbachol	Fluorescence	BGC	Mean	Standard Dev				gcamp edta	Fluoresence Intentsity	BGC	Mean	Standard Dev
1	670.424	427.581	482.706	205.43		1	966.444	784.3	676.12	79.9122				1	1396.63	1076.21	801.542	249.297
2	640.438	397.595	482.706			2	962.225	780.081						2	1038.36	717.937
3	709.851	467.008				3	894.781	712.637						3	729.236	408.813
4	728.521	485.678				4	954.319	772.175						4	1508.25	1187.83
5	956.669	713.826				5	857.573	675.429						5	922.585	602.162
6	780.703	537.86				6	899.673	717.529						6	1249.13	928.705
7	727.184	484.341				7	920.222	738.078						7	1372.67	1052.24
8	767.09	524.247				8	848.11	665.966						8	1123.38	802.958
9	773.249	530.406				9	798.303	616.159						9	1178.11	857.688
10	736.04	493.197				10	756.46	574.316						10	799.38	478.957
11	709.759	466.916				11	689.959	507.815						11	1023.89	703.467
12	795.65	552.807				12	746.39	564.246						12	320.423
13	803.542	560.699				13	895.528	713.384						13
14	738.801	495.958				14	865.526	683.382						14
15	751.261	508.418				15	834.761	652.617						15
16	749.498	506.655				16	841.956	659.812						16
17	650.635	407.792				17	182.144							17
18	661.889	419.046				18								18
	570.304	327.461												20
	542.226	299.383
	778.841	535.998
	719.506	476.663
	242.843
	plain	carbachol	EDTA
	0.8858	1.6248	2.22953
	0.823679	1.61606	1.48732
	0.967479	1.47634	0.846919
	1.00616	1.59968	2.46076
	1.4788	1.39926	1.24747
	1.11426	1.48647	1.92396
	1.00339	1.52904	2.17988
	1.08606	1.37965	1.66345
	1.09882	1.27647	1.77683
	1.02173	1.18978	0.992233
	0.967288	1.05202	1.45734
	1.14522	1.16892
	1.16157	1.47788
	1.02745	1.41573
	1.05327	1.352
	1.04961	1.3669
	0.844804
	0.868118
	0.678386
	0.620218
	1.1104

## Sheet: just heads
	plain						carb						edta
	1	5689.51	782.434	207	3886		1	4113.01	1048.82	204	3949		1	3516.18	724.98	235	3304
	2	6572.97	850.947	314	4810		2	4228.85	1645.34	291	8246		2	3975.59	1302.96	249	7623
	3	5591.34	899.857	303	2573		3	4166.02	1582.4	459	8945		3	3518.15	1029.41	194	6080
	4	6223.51	1630.36	315	5645		4	3728.22	1540.69	552	6388		4	3743.92	809.264	194	4349
	5	5616.86	1234.7	383	3289		5	4219.03	1939.84	263	9758		5	1452.81	1323.02	305	5006
	6	5538.34	945.141	273	6231		6	3592.75	1396.27	232	7085		6	3553.49	1101.74	210	5936
	7	4835.49	814.934	243	4808		7	3217.77	1787.53	430	8904		7	2479.59	1217.11	200	6582
	8	5041.63	974.77	228	5301		8	5112.31	1302.88	413	10239		8	6733.96	1063.08	163	6621
	9	3952.03	1006.1	276	5869		9	5224.22	1281.83	224	6507		9	2291.12	1029.08	275	5802
	10	5752.33	1130.97	280	6991		10	2630.76	1395.31	334	7600		10	3724.29	930.655	303	4743
	11	5742.51	947.959	211	6174		11	3184.4	1527.87	218	8246		11	2691.62	1070.41	398	1936
	12	3476.92	861.9	292	3939		12	4109.09	1477.47	264	7915		12	3865.64	707.067	206	3304
	13	5084.82	1289.67	296	8242		13	4745.18	1366.85	259	5622		13	54356.6	302.835	214	483
	14	7246.36	1052.64	233	5772		14	3930.43	1214.13	308	5633
	15	5734.66	1080.55	438	6305		15	3885.28	1374.95	486	5904
	16	5640.43	875.431	189	6975		16	4613.64	1483.13	298	7673
	17	9875.16	800.674	183	6698		17	20902.8	180.357	115	265
	18	3985.4	850.902	202	4282
	19	5801.41	823.446	236	4824
	20	36280.9	231.76	162	375

## Sheet: just heads analysis
gcamp plain	Fluoresence Intentsity	BGC	Mean	Standard Dev		gcamp carbachol	Fluorescence	BGC	Mean	Standard Dev				gcamp edta	Fluoresence Intentsity	BGC	Mean	Standard Dev
1	782.434	550.674	760.523	366.429		1	1048.82	868.464	1279.97	217.397				1	724.98	422.145	722.898	204.263
2	850.947	619.187	760.523			2	1645.34	1464.98						2	1302.96	1000.13
3	899.857	668.097				3	1582.4	1402.05						3	1029.41	726.579
4	1630.36	1398.6				4	1540.69	1360.33						4	809.264	506.429
5	1234.7	1002.94				5	1939.84	1759.49						5	1323.02	1020.19
6	945.141	713.381				6	1396.27	1215.91						6	1101.74	798.91
7	814.934	583.174				7	1787.53	1607.17						7	1217.11	914.277
8	974.77	743.01				8	1302.88	1122.52						8	1063.08	760.248
9	1006.1	774.338				9	1281.83	1101.48						9	1029.08	726.242
10	1130.97	899.207				10	1395.31	1214.95						10	930.655	627.82
11	947.959	716.199				11	1527.87	1347.51						11	1070.41	767.575
12	861.9	630.14				12	1477.47	1297.11						12	707.067	404.232
13	1289.67	1057.91				13	1366.85	1186.49						13	302.835
14	1052.64	820.884				14	1214.13	1033.77						14
15	1080.55	848.79				15	1374.95	1194.59						15
16	875.431	643.671				16	1483.13	1302.77						16
17	800.674	568.914				17	180.357							17
18	850.902	619.142				18								18
	823.446	591.686												20
	231.76
	plain	carbachol	EDTA
	0.724072	1.14193	0.555072
	0.814159	1.92628	1.31505
	0.87847	1.84353	0.955367
	1.83899	1.78867	0.665895
	1.31875	2.31352	1.34143
	0.938013	1.59878	1.05047
	0.766806	2.11324	1.20217
	0.976972	1.47598	0.999638
	1.01816	1.44831	0.954924
	1.18235	1.59752	0.82551
	0.941719	1.77182	1.00927
	0.828561	1.70555	0.531518
	1.39104	1.5601
	1.07937	1.35929
	1.11606	1.57075
	0.846353	1.71299
	0.748056
	0.8141
	0.777998
