# Supplementary material for: fmo-4 promotes longevity and stress resistance via ER to mitochondria calcium regulation in C. elegans
Source: eLife journal article supplement (doi:10.7554/elife.99971), 2024-08-27
Supplement: fig5-figsupp1-data1 [file GCAMP7 25sept24 testing agar carb edta.xlsx]

## Sheet: Sheet1
	gcamp7f plain						carbachol							edta
	1	6293.85	654.755	188	3749		1	10356.4	467.636	185	1873			1	5664.46	464.539	237	1518
	2	4151.26	484.937	175	1205		2	5239.29	525.406	258	1385			2	5882.07	441.289	239	1202
	3	4417.41	485.756	191	1769		3	6931.6	412.983	160	1247			3	4807.43	448.308	201	1430
	4	6534.89	404.303	172	1310		4	5490.38	601.74	256	3392			4	6096.33	550.321	238	2035
	5	5227.57	476.979	227	1101		5	6524.84	594.889	235	2595			5	8173.63	387.661	153	1022
	6	5669.48	540.087	200	1328		6	6998.56	496.792	245	1617			6	9015.6	369.794	168	1398
	7	5388.27	518.082	304	1021		7	6138.17	544.685	226	3178			7	7170.97	444.574	191	2493
	8	8146.85	357.671	174	969		8	7075.56	461.537	184	1217			8	6931.6	428.926	272	980
	9	7478.96	498.676	264	1021		9	6206.8	837.121	227	6009			9	4315.3	504.96	256	1614
	10	6419.39	433.748	160	2456		10	8464.89	689.688	230	1694			10	3187.1	503.243	302	1881
	11	5098.69	617.252	227	2321		11	7664.77	676.597	338	3294			11	6806.06	438.532	187	1652
	12	6395.95	503.805	199	2077		12	4558.02	740.992	391	2308			12	5269.42	491.733	200	1651
	13	4651.76	505.191	231	1347		13	4526.21	682.356	199	1695			13	4203.15	512.863	236	1651
	14	7117.4	470.647	197	1478		14	4665.15	632.312	252	3392			14	4844.25	517.631	256	1447
	15	5622.61	637.109	211	3270		15	5795.02	544.132	215	1365			15	5470.29	524.938	192	1564
	16	7627.94	554.756	191	2395		16	3839.91	911.831	364	5207			16	4676.86	589.394	291	1653
	17	6536.56	424.985	186	1135		17	6138.17	472.941	200	1217			17	2587.84	745.97	415	1713
	18	6133.15	943.565	196	5164		18	5697.94	542.031	196	3178			18	6715.67	431.389	224	1281
	19	5008.29	469.098	240	1142		19	91210.5	191.726	124	321			19	5890.44	568.392	281	1256
	20	5724.72	455.721	211	797									20	6310.59	443.859	189	1190
	21	6131.48	457.443	221	931									21	3500.11	457.162	259	1119
	22	6347.41	409.244	200	971									22	7209.47	496.299	309	1061
	23	4091	430.924	197	1021									23	8228.87	509.671	273	1080
	24	4675.19	495.294	180	1391									24	122941	239.651	167	410
	25	6231.91	416.78	188	797
	26	141248	211.661	135	426

## Sheet: Sheet2
gcamp plain	Fluoresence Intentsity	BGC	Mean	Standard Dev		gcamp carbachol	Fluorescence	BGC	Mean	Standard Dev				gcamp edta	Fluoresence Intentsity	BGC	Mean	Standard Dev
1	654.755	443.094	294.211	153.267		1	467.636	275.91	410.256	134.735				1	464.539	224.888	250.412	84.8189
2	484.937	273.276	294.211			2	525.406	333.68						2	441.289	201.638
3	485.756	274.095				3	412.983	221.257						3	448.308	208.657
4	404.303	192.642				4	601.74	410.014						4	550.321	310.67
5	476.979	265.318				5	594.889	403.163						5	387.661	148.01
6	540.087	328.426				6	496.792	305.066						6	369.794	130.143
7	518.082	306.421				7	544.685	352.959						7	444.574	204.923
8	357.671	146.01				8	461.537	269.811						8	428.926	189.275
9	498.676	287.015				9	837.121	645.395						9	504.96	265.309
10	433.748	222.087				10	689.688	497.962						10	503.243	263.592
11	617.252	405.591				11	676.597	484.871						11	438.532	198.881
12	503.805	292.144				12	740.992	549.266						12	491.733	252.082
13	505.191	293.53				13	682.356	490.63						13	512.863	273.212
14	470.647	258.986				14	632.312	440.586						14	517.631	277.98
15	637.109	425.448				15	544.132	352.406						15	524.938	285.287
16	554.756	343.095				16	911.831	720.105						16	589.394	349.743
17	424.985	213.324				17	472.941	281.215						17	745.97	506.319
18	943.565	731.904				18	542.031	350.305						18	431.389	191.738
	469.098	257.437					191.726							20	568.392	328.741
	455.721	244.06													443.859	204.208
	457.443	245.782													457.162	217.511
	409.244	197.583													496.299	256.648
	430.924	219.263													509.671	270.02
	495.294	283.633													239.651
	416.78	205.119
	211.661
	plain	carbachol	EDTA
	1.50604	0.937795	0.764376
	0.928843	1.13415	0.685351
	0.931626	0.752034	0.709208
	0.654774	1.3936	1.05594
	0.901794	1.37032	0.503074
	1.11629	1.03689	0.442345
	1.0415	1.19968	0.696516
	0.496276	0.917065	0.64333
	0.97554	2.19364	0.901763
	0.754855	1.69253	0.895927
	1.37857	1.64804	0.67598
	0.992973	1.86691	0.856806
	0.997684	1.66761	0.928625
	0.880272	1.49752	0.944831
	1.44606	1.1978	0.969667
	1.16615	2.44758	1.18875
	0.725071	0.955827	1.72094
	2.48768	1.19066	0.651702
	0.875007		1.11736
	0.82954		0.694086
	0.835393		0.739302
	0.671568		0.872325
	0.745257		0.917776
	0.964045
	0.697183

## Sheet: just heads
	plain						carb						edta
	1	5689.51	782.434	207	3886		1	4113.01	1048.82	204	3949		1	3516.18	724.98	235	3304
	2	6572.97	850.947	314	4810		2	4228.85	1645.34	291	8246		2	3975.59	1302.96	249	7623
	3	5591.34	899.857	303	2573		3	4166.02	1582.4	459	8945		3	3518.15	1029.41	194	6080
	4	6223.51	1630.36	315	5645		4	3728.22	1540.69	552	6388		4	3743.92	809.264	194	4349
	5	5616.86	1234.7	383	3289		5	4219.03	1939.84	263	9758		5	1452.81	1323.02	305	5006
	6	5538.34	945.141	273	6231		6	3592.75	1396.27	232	7085		6	3553.49	1101.74	210	5936
	7	4835.49	814.934	243	4808		7	3217.77	1787.53	430	8904		7	2479.59	1217.11	200	6582
	8	5041.63	974.77	228	5301		8	5112.31	1302.88	413	10239		8	6733.96	1063.08	163	6621
	9	3952.03	1006.1	276	5869		9	5224.22	1281.83	224	6507		9	2291.12	1029.08	275	5802
	10	5752.33	1130.97	280	6991		10	2630.76	1395.31	334	7600		10	3724.29	930.655	303	4743
	11	5742.51	947.959	211	6174		11	3184.4	1527.87	218	8246		11	2691.62	1070.41	398	1936
	12	3476.92	861.9	292	3939		12	4109.09	1477.47	264	7915		12	3865.64	707.067	206	3304
	13	5084.82	1289.67	296	8242		13	4745.18	1366.85	259	5622		13	54356.6	302.835	214	483
	14	7246.36	1052.64	233	5772		14	3930.43	1214.13	308	5633
	15	5734.66	1080.55	438	6305		15	3885.28	1374.95	486	5904
	16	5640.43	875.431	189	6975		16	4613.64	1483.13	298	7673
	17	9875.16	800.674	183	6698		17	20902.8	180.357	115	265
	18	3985.4	850.902	202	4282
	19	5801.41	823.446	236	4824
	20	36280.9	231.76	162	375

## Sheet: just heads analysis
gcamp plain	Fluoresence Intentsity	BGC	Mean	Standard Dev		gcamp carbachol	Fluorescence	BGC	Mean	Standard Dev				gcamp edta	Fluoresence Intentsity	BGC	Mean	Standard Dev
1	782.434	550.674	760.523	366.429		1	1048.82	868.464	1279.97	217.397				1	724.98	422.145	722.898	204.263
2	850.947	619.187	760.523			2	1645.34	1464.98						2	1302.96	1000.13
3	899.857	668.097				3	1582.4	1402.05						3	1029.41	726.579
4	1630.36	1398.6				4	1540.69	1360.33						4	809.264	506.429
5	1234.7	1002.94				5	1939.84	1759.49						5	1323.02	1020.19
6	945.141	713.381				6	1396.27	1215.91						6	1101.74	798.91
7	814.934	583.174				7	1787.53	1607.17						7	1217.11	914.277
8	974.77	743.01				8	1302.88	1122.52						8	1063.08	760.248
9	1006.1	774.338				9	1281.83	1101.48						9	1029.08	726.242
10	1130.97	899.207				10	1395.31	1214.95						10	930.655	627.82
11	947.959	716.199				11	1527.87	1347.51						11	1070.41	767.575
12	861.9	630.14				12	1477.47	1297.11						12	707.067	404.232
13	1289.67	1057.91				13	1366.85	1186.49						13	302.835
14	1052.64	820.884				14	1214.13	1033.77						14
15	1080.55	848.79				15	1374.95	1194.59						15
16	875.431	643.671				16	1483.13	1302.77						16
17	800.674	568.914				17	180.357							17
18	850.902	619.142				18								18
	823.446	591.686												20
	231.76
	plain	carbachol	EDTA
	0.724072	1.14193	0.555072
	0.814159	1.92628	1.31505
	0.87847	1.84353	0.955367
	1.83899	1.78867	0.665895
	1.31875	2.31352	1.34143
	0.938013	1.59878	1.05047
	0.766806	2.11324	1.20217
	0.976972	1.47598	0.999638
	1.01816	1.44831	0.954924
	1.18235	1.59752	0.82551
	0.941719	1.77182	1.00927
	0.828561	1.70555	0.531518
	1.39104	1.5601
	1.07937	1.35929
	1.11606	1.57075
	0.846353	1.71299
	0.748056
	0.8141
	0.777998
