# Supplementary material for: fmo-4 promotes longevity and stress resistance via ER to mitochondria calcium regulation in C. elegans
Source: eLife journal article supplement (doi:10.7554/elife.99971), 2024-08-27
Supplement: fig6-data1 [file 05FEB2024 RNAi longevity lifespan EV CRT-1.xlsx]

## Sheet: lifespan
strain	day	alive	dead-total	dead-normal	dead-ruptured	censored	ratio-alive	percentage-alive
N2 EV	0	118	0				1	100
N2 EV	5	118	0				1	100
N2 EV	7	118	0				1	100						1	2	3	4	5	6	7	8	9	10	11	12	13	14	15
N2 EV	10	116	2	2			0.983051	98.3051			plot data here-->		day	WT; EV RNAi	FMO-4 OE; EV RNAi	FMO-4 KO; EV RNAi	WT; crt-1 RNAi	FMO-4 OE; crt-1 RNAi	FMO-4 KO; crt-1 RNAi
N2 EV	13	109	9	7			0.923729	92.3729				0	0	100	100	100	100	100	100
N2 EV	15	99	19	10			0.838983	83.8983				5	5	100	100	100	100	100	100
N2 EV	17	86	32	13			0.728814	72.8814				7	7	100	100	100	100	100	100
N2 EV	20	68	50	18			0.576271	57.6271				10	10	98.3051	100	99.1597	100	100	100
N2 EV	22	47	71	21			0.398305	39.8305				13	13	92.3729	97.5	94.1176	98.3333	98.3333	97.3913
N2 EV	24	28	90	19			0.237288	23.7288				15	15	83.8983	93.3333	83.1933	92.5	96.6667	93.913
N2 EV	27	13	105	15			0.110169	11.0169				17	17	72.8814	86.6667	69.7479	88.3333	87.5	86.9565
N2 EV	29	2	116	11			0.0169492	1.69492				20	20	57.6271	77.5	48.7395	80	75	73.913
N2 EV	31	0	118	2			0	0				22	22	39.8305	66.6667	29.4118	65.8333	60	59.1304
N2 EV	34	0	118				0	0				24	24	23.7288	52.5	14.2857	50	39.1667	40.8696
N2 EV	36	0	118				0	0				27	27	11.0169	33.3333	5.04202	27.5	22.5	26.087
N2 EV	38	0	118				0	0				29	29	1.69492	20	2.52101	12.5	9.16667	14.7826
N2 EV	41	0	118				0	0				31	31	0	11.6667	0	7.5	5	8.69565
N2 EV	43	0	118				0	0				34	34		6.66667		4.16667	2.5	5.21739
N2 EV	45	0	118				0	0				36	36		2.5		1.66667	0.833333	2.6087
												38	38		0		0.833333	0	1.73913
4OE EV	0	120	0				1	100				41	41				0		0
4OE EV	5	120	0				1	100				43	43
4OE EV	7	120	0				1	100				45	45
4OE EV	10	120	0	0			1	100
4OE EV	13	117	3	3			0.975	97.5
4OE EV	15	112	8	5			0.933333	93.3333
4OE EV	17	104	16	8			0.866667	86.6667
4OE EV	20	93	27	11			0.775	77.5
4OE EV	22	80	40	13			0.666667	66.6667
4OE EV	24	63	57	17			0.525	52.5
4OE EV	27	40	80	23			0.333333	33.3333
4OE EV	29	24	96	16			0.2	20
4OE EV	31	14	106	10			0.116667	11.6667
4OE EV	34	8	112	6			0.0666667	6.66667
4OE EV	36	3	117	5			0.025	2.5
4OE EV	38	0	120	3			0	0
4OE EV	41	0	120				0	0
4OE EV	43	0	120				0	0
4OE EV	45	0	120				0	0
4KO EV	0	119	0				1	100
4KO EV	5	119	0				1	100
4KO EV	7	119	0				1	100
4KO EV	10	118	1	1			0.991597	99.1597
4KO EV	13	112	7	6			0.941176	94.1176
4KO EV	15	99	20	13			0.831933	83.1933
4KO EV	17	83	36	16			0.697479	69.7479
4KO EV	20	58	61	25			0.487395	48.7395
4KO EV	22	35	84	23			0.294118	29.4118
4KO EV	24	17	102	18			0.142857	14.2857
4KO EV	27	6	113	11			0.0504202	5.04202
4KO EV	29	3	116	3			0.0252101	2.52101
4KO EV	31	0	119	3			0	0
4KO EV	34	0	119				0	0
4KO EV	36	0	119				0	0
4KO EV	38	0	119				0	0
4KO EV	41	0	119				0	0
4KO EV	43	0	119				0	0
4KO EV	45	0	119				0	0
WT crt-1	0	120	0				1	100
WT crt-1	5	120	0				1	100
WT crt-1	7	120	0				1	100
WT crt-1	10	120	0	0			1	100
WT crt-1	13	118	2	2			0.983333	98.3333
WT crt-1	15	111	9	7			0.925	92.5
WT crt-1	17	106	14	5			0.883333	88.3333
WT crt-1	20	96	24	10			0.8	80
WT crt-1	22	79	41	17			0.658333	65.8333
WT crt-1	24	60	60	19			0.5	50
WT crt-1	27	33	87	27			0.275	27.5
WT crt-1	29	15	105	18			0.125	12.5
WT crt-1	31	9	111	6			0.075	7.5
WT crt-1	34	5	115	4			0.0416667	4.16667
WT crt-1	36	2	118	3			0.0166667	1.66667
WT crt-1	38	1	119	1			0.00833333	0.833333
WT crt-1	41	0	120	1			0	0
WT crt-1	43	0	120				0	0
WT crt-1	45	0	120				0	0
4OE crt-1	0	120	0				1	100
4OE crt-1	5	120	0				1	100
4OE crt-1	7	120	0				1	100
4OE crt-1	10	120	0	0			1	100
4OE crt-1	13	118	2	2			0.983333	98.3333
4OE crt-1	15	116	4	2			0.966667	96.6667
4OE crt-1	17	105	15	11			0.875	87.5
4OE crt-1	20	90	30	15			0.75	75
4OE crt-1	22	72	48	18			0.6	60
4OE crt-1	24	47	73	25			0.391667	39.1667
4OE crt-1	27	27	93	20			0.225	22.5
4OE crt-1	29	11	109	16			0.0916667	9.16667
4OE crt-1	31	6	114	5			0.05	5
4OE crt-1	34	3	117	3			0.025	2.5
4OE crt-1	36	1	119	2			0.00833333	0.833333
4OE crt-1	38	0	120	1			0	0
4OE crt-1	41	0	120				0	0
4OE crt-1	43	0	120				0	0
4OE crt-1	45	0	120				0	0
4KO crt-1	0	115	0				1	100
4KO crt-1	5	115	0				1	100
4KO crt-1	7	115	0				1	100
4KO crt-1	10	115	0	0			1	100
4KO crt-1	13	112	3	3			0.973913	97.3913
4KO crt-1	15	108	7	4			0.93913	93.913
4KO crt-1	17	100	15	8			0.869565	86.9565
4KO crt-1	20	85	30	15			0.73913	73.913
4KO crt-1	22	68	47	17			0.591304	59.1304
4KO crt-1	24	47	68	21			0.408696	40.8696
4KO crt-1	27	30	85	17			0.26087	26.087
4KO crt-1	29	17	98	13			0.147826	14.7826
4KO crt-1	31	10	105	7			0.0869565	8.69565
4KO crt-1	34	6	109	4			0.0521739	5.21739
4KO crt-1	36	3	112	3			0.026087	2.6087
4KO crt-1	38	2	113	1			0.0173913	1.73913
4KO crt-1	41	0	115	2			0	0
4KO crt-1	43	0	115				0	0
4KO crt-1	45	0	115				0	0

## Sheet: crt1 stats
% WT EV [118]						condition	chi	pvalue	corrected_pvalue
#days	dead	censored				WT EV v.s. fmo-4 OE EV	32.45	1.2e-08	6.1e-08
0						WT EV v.s. fmo-4 KO EV	2.76	0.0965	0.4825
5						WT EV v.s. WT crt1	25.52	4.4e-07	2.2e-06
7						WT EV v.s. fmo-4 OE crt1	14.78	0.0001	0.0006
10	2					WT EV v.s. fmo-4 ko crt1	18.17	2e-05	0.0001
13	7					fmo-4 OE EV v.s. WT EV	32.45	1.2e-08	6.1e-08
15	10					fmo-4 OE EV v.s. fmo-4 KO EV	49.66	0	0
17	13					fmo-4 OE EV v.s. WT crt1	0.79	0.373	1
20	18					fmo-4 OE EV v.s. fmo-4 OE crt1	5.12	0.0237	0.1185
22	21					fmo-4 OE EV v.s. fmo-4 ko crt1	1.2	0.2732	1
24	19					fmo-4 KO EV v.s. WT EV	2.76	0.0965	0.4825
27	15					fmo-4 KO EV v.s. fmo-4 OE EV	49.66	0	0
29	11					fmo-4 KO EV v.s. WT crt1	44.11	0	0
31	2					fmo-4 KO EV v.s. fmo-4 OE crt1	30.3	3.7e-08	1.8e-07
34						fmo-4 KO EV v.s. fmo-4 ko crt1	32.58	1.1e-08	5.7e-08
36						WT crt1 v.s. WT EV	25.52	4.4e-07	2.2e-06
38						WT crt1 v.s. fmo-4 OE EV	0.79	0.373	1
41						WT crt1 v.s. fmo-4 KO EV	44.11	0	0
43						WT crt1 v.s. fmo-4 OE crt1	1.99	0.1583	0.7917
45						WT crt1 v.s. fmo-4 ko crt1	0.15	0.6974	1
						fmo-4 OE crt1 v.s. WT EV	14.78	0.0001	0.0006
% fmo-4 OE EV [120]						fmo-4 OE crt1 v.s. fmo-4 OE EV	5.12	0.0237	0.1185
#days	dead	censored				fmo-4 OE crt1 v.s. fmo-4 KO EV	30.3	3.7e-08	1.8e-07
0						fmo-4 OE crt1 v.s. WT crt1	1.99	0.1583	0.7917
5						fmo-4 OE crt1 v.s. fmo-4 ko crt1	0.81	0.3684	1
7						fmo-4 ko crt1 v.s. WT EV	18.17	2e-05	0.0001
10	0					fmo-4 ko crt1 v.s. fmo-4 OE EV	1.2	0.2732	1
13	3					fmo-4 ko crt1 v.s. fmo-4 KO EV	32.58	1.1e-08	5.7e-08
15	5					fmo-4 ko crt1 v.s. WT crt1	0.15	0.6974	1
17	8					fmo-4 ko crt1 v.s. fmo-4 OE crt1	0.81	0.3684	1
20	11
22	13
24	17
27	23
29	16
31	10
34	6
36	5
38	3
41
43
45
% fmo-4 KO EV [119]
#days	dead	censored
0
5
7
10	1
13	6
15	13
17	16
20	25
22	23
24	18
27	11
29	3
31	3
34
36
38
41
43
45
% WT crt1 [120]
#days	dead	censored
0
5
7
10	0
13	2
15	7
17	5
20	10
22	17
24	19
27	27
29	18
31	6
34	4
36	3
38	1
41	1
43
45
% fmo-4 OE crt1 [120]
#days	dead	censored
0
5
7
10	0
13	2
15	2
17	11
20	15
22	18
24	25
27	20
29	16
31	5
34	3
36	2
38	1
41
43
45
% fmo-4 ko crt1 [115]
#days	dead	censored
0
5
7
10	0
13	3
15	4
17	8
20	15
22	17
24	21
27	17
29	13
31	7
34	4
36	3
38	1
41	2
43
45

## Sheet: Sheet1
#1	N2								#1	N2					#1	N2
#2	Lei42	fmo-2p::MC; unc-119p::HIF-1(P621A); JT307 #1							#2	Lei42	fmo-2p::MC; unc-119p::HIF-1(P621A); JT307 #1				#11L	Lei51	fmo-2p::MC; JT307; gcy-31; gcy-36 - XA2262 sibling #1
#3	Lei43	fmo-2p::MC; unc-119p::HIF-1(P621A); JT307 #2							#3	Lei43	fmo-2p::MC; unc-119p::HIF-1(P621A); JT307 #2				#12L	Lei52	fmo-2p::MC; JT307; gcy-33; gcy-36 - XA2262 sibling #1
#4	Lei44	fmo-2p::MC; TU3311; CB5602 #1							#4	Lei44	fmo-2p::MC; TU3311; CB5602 #1				#13	Lei53	fmo-2p::MC; JT307; gcy-33; gcy-36 - XA2262 sibling #2
#5	Lei45	fmo-2p::MC; TU3311 #1							#5	Lei45	fmo-2p::MC; TU3311 #1				#14L	Lei55	fmo-2p::MC; JT307 - XA2262 sibling #1
#6	Lei46	fmo-2p::MC; CB5602 #1							#6	Lei46	fmo-2p::MC; CB5602 #1				#15L	Lei56	fmo-2p::MC; JT307 - XA2262 sibling #2
#7	Lei47	fmo-2p::MC; TU3311; CB5602 #2							#7	Lei47	fmo-2p::MC; TU3311; CB5602 #2				#16	Lei57	fmo-2p::MC - XA2262 sibling #1
#8L	Lei48	fmo-2p::MC; JT307; XA2262 #1													#17	Lei58	fmo-2p::MC - XA2262 sibling #2
#9	Lei49	fmo-2p::MC; JT307; XA2262 #2													#18	Lei59	fmo-2p::MC; gcy-33; gcy-36 - XA2262 sibling #1
#10L	Lei50	fmo-2p::MC; JT307; XA2262 #3							#1	N2					#19	Lei60	fmo-2p::MC; gcy-33; gcy-36 - XA2262 sibling #2
#11L	Lei51	fmo-2p::MC; JT307; gcy-31; gcy-36 - XA2262 sibling #1							#8L	Lei48	fmo-2p::MC; JT307; XA2262 #1
#12L	Lei52	fmo-2p::MC; JT307; gcy-33; gcy-36 - XA2262 sibling #1							#9	Lei49	fmo-2p::MC; JT307; XA2262 #2
#13	Lei53	fmo-2p::MC; JT307; gcy-33; gcy-36 - XA2262 sibling #2							#10L	Lei50	fmo-2p::MC; JT307; XA2262 #3
#14L	Lei55	fmo-2p::MC; JT307 - XA2262 sibling #1							#14L	Lei55	fmo-2p::MC; JT307 - XA2262 sibling #1
#15L	Lei56	fmo-2p::MC; JT307 - XA2262 sibling #2							#15L	Lei56	fmo-2p::MC; JT307 - XA2262 sibling #2
#16	Lei57	fmo-2p::MC - XA2262 sibling #1							#16	Lei57	fmo-2p::MC - XA2262 sibling #1
#17	Lei58	fmo-2p::MC - XA2262 sibling #2							#17	Lei58	fmo-2p::MC - XA2262 sibling #2
#18	Lei59	fmo-2p::MC; gcy-33; gcy-36 - XA2262 sibling #1							#20	Lei61	fmo-2p::MC; XA2262 #1
#19	Lei60	fmo-2p::MC; gcy-33; gcy-36 - XA2262 sibling #2							#21	Lei62	fmo-2p::MC; XA2262 #2
#20	Lei61	fmo-2p::MC; XA2262 #1
#21	Lei62	fmo-2p::MC; XA2262 #2
