# Supplementary material for: fmo-4 promotes longevity and stress resistance via ER to mitochondria calcium regulation in C. elegans
Source: eLife journal article supplement (doi:10.7554/elife.99971), 2024-08-27
Supplement: fig6-data1 [file 05OCT2023 RNAi longevity lifespan calcium signaling replicate.xlsx]

## Sheet: lifespan
strain	day	alive	dead-total	dead-normal	dead-ruptured	censored	ratio-alive	percentage-alive
N2 EV	0	120	0				1	100
N2 EV	5	120	0				1	100
N2 EV	7	120	0				1	100						1	2		3	4	5	6	7	8	9	10		11	12	13	14	15
N2 EV	10	120	0	0			1	100			plot data here-->		day	WT; Empty Vector	FMO-4 OE; Empty Vector	FMO-4 OE hyp sp; Empty Vector	FMO-4 KO; Empty Vector	WT; crt-1 RNAi	FMO-4 OE; crt-1 RNAi	FMO-4 OE hyp sp; crt-1 RNAi	FMO-4 KO; crt-1 RNAi	WT; mcu-1 RNAi	FMO-4 OE; mcu-1 RNAi	FMO-4 OE hyp sp; mcu-1 RNAi	FMO-4 KO; mcu-1 RNAi	WT; itr-1 RNAi	FMO-4 OE; itr-1 RNAi	FMO-4 OE hyp sp; itr-1 RNAi	FMO-4 KO; itr-1 RNAi
N2 EV	14	118	2	2			0.983333	98.3333				0	0	100	100	100	100	100	100	100	100	100	100	100	100	100	100	100	100
N2 EV	16	113	7	5			0.941667	94.1667				5	5	100	100	100	100	100	100	100	100	100	100	100	100	100	100	100	100
N2 EV	18	102	18	11			0.85	85				7	7	100	100	100	100	100	100	100	100	100	100	100	100	100	100	100	100
N2 EV	21	89	31	13			0.741667	74.1667				10	10	100	100	100	100	100	100	100	100	100	100	100	100	100	100	100	100
N2 EV	23	51	69	38			0.425	42.5				14	14	98.3333	100	100	96.9466	100	100	100	100	97.5806	95.7143	96.6387	94.5055	95.3271	92.233	94.958	91.5254
N2 EV	25	32	88	19			0.266667	26.6667				16	16	94.1667	97.9592	99.1453	92.3664	100	100	99.1228	99.0741	92.7419	84.2857	88.2353	82.4176	88.785	85.4369	88.2353	81.3559
N2 EV	28	10	110	22			0.0833333	8.33333				18	18	85	93.8776	94.0171	83.2061	95.4955	95.1456	95.614	91.6667	84.6774	70	78.9916	63.7363	77.5701	70.8738	75.6303	64.4068
N2 EV	30	2	118	8			0.0166667	1.66667				21	21	74.1667	87.7551	88.8889	66.4122	88.2883	87.3786	91.2281	84.2593	63.7097	51.4286	61.3445	34.0659	57.0093	46.6019	53.7815	33.8983
N2 EV	32	0	120	2			0	0				23	23	42.5	74.4898	76.9231	32.8244	74.7748	73.7864	78.0702	59.2593	39.5161	25.7143	35.2941	5.49451	29.9065	16.5049	24.3697	5.9322
N2 EV	35	0	120				0	0				25	25	26.6667	55.102	59.8291	7.63359	50.4505	56.3107	55.2632	33.3333	23.3871	14.2857	20.1681	1.0989	14.0187	6.79612	12.605	0.847458
N2 EV	37	0	120				0	0				28	28	8.33333	36.7347	41.0256	2.29008	28.8288	36.8932	35.0877	18.5185	4.83871	5.71429	7.56303	0	4.6729	1.94175	5.04202	0
N2 EV	39	0	120				0	0				30	30	1.66667	17.3469	23.0769	0	13.5135	25.2427	24.5614	10.1852	0.806452	2.85714	1.68067		0.934579	0	1.68067
N2 EV	41	0	120				0	0				32	32	0	8.16327	11.1111		8.10811	17.4757	18.4211	3.7037	0	0	0		0		0
N2 EV	43	0	120				0	0				35	35		5.10204	3.4188		1.8018	6.79612	7.01754	0
N2 EV	45	0	120				0	0				37	37		0	0.854701		0	1.94175	3.50877
												39	39			0			0	0
4OE EV	0	98	0				1	100				41	41
4OE EV	5	98	0				1	100				43	43
4OE EV	7	98	0				1	100				45	45
4OE EV	10	98	0	0			1	100
4OE EV	14	98	0	0			1	100
4OE EV	16	96	2	2			0.979592	97.9592
4OE EV	18	92	6	4			0.938776	93.8776
4OE EV	21	86	12	6			0.877551	87.7551
4OE EV	23	73	25	13			0.744898	74.4898
4OE EV	25	54	44	19			0.55102	55.102
4OE EV	28	36	62	18			0.367347	36.7347
4OE EV	30	17	81	19			0.173469	17.3469
4OE EV	32	8	90	9			0.0816327	8.16327
4OE EV	35	5	93	3			0.0510204	5.10204
4OE EV	37	0	98	5			0	0
4OE EV	39	0	98				0	0
4OE EV	41	0	98				0	0
4OE EV	43	0	98				0	0
4OE EV	45	0	98				0	0
6.3 EV	0	117	0				1	100
6.3 EV	5	117	0				1	100
6.3 EV	7	117	0				1	100
6.3 EV	10	117	0	0			1	100
6.3 EV	14	117	0	0			1	100
6.3 EV	16	116	1	1			0.991453	99.1453
6.3 EV	18	110	7	6			0.940171	94.0171
6.3 EV	21	104	13	6			0.888889	88.8889
6.3 EV	23	90	27	14			0.769231	76.9231
6.3 EV	25	70	47	20			0.598291	59.8291
6.3 EV	28	48	69	22			0.410256	41.0256
6.3 EV	30	27	90	21			0.230769	23.0769
6.3 EV	32	13	104	14			0.111111	11.1111
6.3 EV	35	4	113	9			0.034188	3.4188
6.3 EV	37	1	116	3			0.00854701	0.854701
6.3 EV	39	0	117	1			0	0
6.3 EV	41	0	117				0	0
6.3 EV	43	0	117				0	0
6.3 EV	45	0	117				0	0
4KO EV	0	131	0				1	100
4KO EV	5	131	0				1	100
4KO EV	7	131	0				1	100
4KO EV	10	131	0	0			1	100
4KO EV	14	127	4	4			0.969466	96.9466
4KO EV	16	121	10	6			0.923664	92.3664
4KO EV	18	109	22	12			0.832061	83.2061
4KO EV	21	87	44	22			0.664122	66.4122
4KO EV	23	43	88	44			0.328244	32.8244
4KO EV	25	10	121	33			0.0763359	7.63359
4KO EV	28	3	128	7			0.0229008	2.29008
4KO EV	30	0	131	3			0	0
4KO EV	32	0	131				0	0
4KO EV	35	0	131				0	0
4KO EV	37	0	131				0	0
4KO EV	39	0	131				0	0
4KO EV	41	0	131				0	0
4KO EV	43	0	131				0	0
4KO EV	45	0	131				0	0
WT crt-1	0	111	0				1	100
WT crt-1	5	111	0				1	100
WT crt-1	7	111	0				1	100
WT crt-1	10	111	0	0			1	100
WT crt-1	14	111	0	0			1	100
WT crt-1	16	111	0	0			1	100
WT crt-1	18	106	5	5			0.954955	95.4955
WT crt-1	21	98	13	8			0.882883	88.2883
WT crt-1	23	83	28	15			0.747748	74.7748
WT crt-1	25	56	55	27			0.504505	50.4505
WT crt-1	28	32	79	24			0.288288	28.8288
WT crt-1	30	15	96	17			0.135135	13.5135
WT crt-1	32	9	102	6			0.0810811	8.10811
WT crt-1	35	2	109	7			0.018018	1.8018
WT crt-1	37	0	111	2			0	0
WT crt-1	39	0	111				0	0
WT crt-1	41	0	111				0	0
WT crt-1	43	0	111				0	0
WT crt-1	45	0	111				0	0
4OE crt-1	0	103	0				1	100
4OE crt-1	5	103	0				1	100
4OE crt-1	7	103	0				1	100
4OE crt-1	10	103	0	0			1	100
4OE crt-1	14	103	0	0			1	100
4OE crt-1	16	103	0	0			1	100
4OE crt-1	18	98	5	5			0.951456	95.1456
4OE crt-1	21	90	13	8			0.873786	87.3786
4OE crt-1	23	76	27	14			0.737864	73.7864
4OE crt-1	25	58	45	18			0.563107	56.3107
4OE crt-1	28	38	65	20			0.368932	36.8932
4OE crt-1	30	26	77	12			0.252427	25.2427
4OE crt-1	32	18	85	8			0.174757	17.4757
4OE crt-1	35	7	96	11			0.0679612	6.79612
4OE crt-1	37	2	101	5			0.0194175	1.94175
4OE crt-1	39	0	103	2			0	0
4OE crt-1	41	0	103				0	0
4OE crt-1	43	0	103				0	0
4OE crt-1	45	0	103				0	0
6.3 crt-1	0	114	0				1	100
6.3 crt-1	5	114	0				1	100
6.3 crt-1	7	114	0				1	100
6.3 crt-1	10	114	0	0			1	100
6.3 crt-1	14	114	0	0			1	100
6.3 crt-1	16	113	1	1			0.991228	99.1228
6.3 crt-1	18	109	5	4			0.95614	95.614
6.3 crt-1	21	104	10	5			0.912281	91.2281
6.3 crt-1	23	89	25	15			0.780702	78.0702
6.3 crt-1	25	63	51	26			0.552632	55.2632
6.3 crt-1	28	40	74	23			0.350877	35.0877
6.3 crt-1	30	28	86	12			0.245614	24.5614
6.3 crt-1	32	21	93	7			0.184211	18.4211
6.3 crt-1	35	8	106	13			0.0701754	7.01754
6.3 crt-1	37	4	110	4			0.0350877	3.50877
6.3 crt-1	39	0	114	4			0	0
6.3 crt-1	41	0	114				0	0
6.3 crt-1	43	0	114				0	0
6.3 crt-1	45	0	114				0	0
4KO crt-1	0	108	0				1	100
4KO crt-1	5	108	0				1	100
4KO crt-1	7	108	0				1	100
4KO crt-1	10	108	0	0			1	100
4KO crt-1	14	108	0	0			1	100
4KO crt-1	16	107	1	1			0.990741	99.0741
4KO crt-1	18	99	9	8			0.916667	91.6667
4KO crt-1	21	91	17	8			0.842593	84.2593
4KO crt-1	23	64	44	27			0.592593	59.2593
4KO crt-1	25	36	72	28			0.333333	33.3333
4KO crt-1	28	20	88	16			0.185185	18.5185
4KO crt-1	30	11	97	9			0.101852	10.1852
4KO crt-1	32	4	104	7			0.037037	3.7037
4KO crt-1	35	0	108	4			0	0
4KO crt-1	37	0	108				0	0
4KO crt-1	39	0	108				0	0
4KO crt-1	41	0	108				0	0
4KO crt-1	43	0	108				0	0
4KO crt-1	45
WT mcu-1	0	124	0				1	100
WT mcu-1	5	124	0				1	100
WT mcu-1	7	124	0				1	100
WT mcu-1	10	124	0	0			1	100
WT mcu-1	14	121	3	3			0.975806	97.5806
WT mcu-1	16	115	9	6			0.927419	92.7419
WT mcu-1	18	105	19	10			0.846774	84.6774
WT mcu-1	21	79	45	26			0.637097	63.7097
WT mcu-1	23	49	75	30			0.395161	39.5161
WT mcu-1	25	29	95	20			0.233871	23.3871
WT mcu-1	28	6	118	23			0.0483871	4.83871
WT mcu-1	30	1	123	5			0.00806452	0.806452
WT mcu-1	32	0	124	1			0	0
WT mcu-1	35	0	124				0	0
WT mcu-1	37	0	124				0	0
WT mcu-1	39	0	124				0	0
WT mcu-1	41	0	124				0	0
WT mcu-1	43	0	124				0	0
WT mcu-1	45	0	124				0	0
WT mcu-1	47	0	124				0	0
4OE mcu-1	0	70	0				1	100
4OE mcu-1	5	70	0				1	100
4OE mcu-1	7	70	0				1	100
4OE mcu-1	10	70	0	0			1	100
4OE mcu-1	14	67	3	3			0.957143	95.7143
4OE mcu-1	16	59	11	8			0.842857	84.2857
4OE mcu-1	18	49	21	10			0.7	70
4OE mcu-1	21	36	34	13			0.514286	51.4286
4OE mcu-1	23	18	52	18			0.257143	25.7143
4OE mcu-1	25	10	60	8			0.142857	14.2857
4OE mcu-1	28	4	66	6			0.0571429	5.71429
4OE mcu-1	30	2	68	2			0.0285714	2.85714
4OE mcu-1	32	0	70	2			0	0
4OE mcu-1	35	0	70				0	0
4OE mcu-1	37	0	70				0	0
4OE mcu-1	39	0	70				0	0
4OE mcu-1	41	0	70				0	0
4OE mcu-1	43	0	70				0	0
	45
6.3 mcu-1	0	119	0				1	100
6.3 mcu-1	5	119	0				1	100
6.3 mcu-1	7	119	0				1	100
6.3 mcu-1	10	119	0	0			1	100
6.3 mcu-1	14	115	4	4			0.966387	96.6387
6.3 mcu-1	16	105	14	10			0.882353	88.2353
6.3 mcu-1	18	94	25	11			0.789916	78.9916
6.3 mcu-1	21	73	46	21			0.613445	61.3445
6.3 mcu-1	23	42	77	31			0.352941	35.2941
6.3 mcu-1	25	24	95	18			0.201681	20.1681
6.3 mcu-1	28	9	110	15			0.0756303	7.56303
6.3 mcu-1	30	2	117	7			0.0168067	1.68067
6.3 mcu-1	32	0	119	2			0	0
6.3 mcu-1	35	0	119				0	0
6.3 mcu-1	37	0	119				0	0
6.3 mcu-1	39	0	119				0	0
6.3 mcu-1	41	0	119				0	0
6.3 mcu-1	43	0	119				0	0
6.3 mcu-1	45
4KO mcu-1	0	91	0				1	100
4KO mcu-1	5	91	0				1	100
4KO mcu-1	7	91	0				1	100
4KO mcu-1	10	91	0	0			1	100
4KO mcu-1	14	86	5	5			0.945055	94.5055
4KO mcu-1	16	75	16	11			0.824176	82.4176
4KO mcu-1	18	58	33	17			0.637363	63.7363
4KO mcu-1	21	31	60	27			0.340659	34.0659
4KO mcu-1	23	5	86	26			0.0549451	5.49451
4KO mcu-1	25	1	90	4			0.010989	1.0989
4KO mcu-1	28	0	91	1			0	0
4KO mcu-1	30	0	91				0	0
4KO mcu-1	32	0	91				0	0
4KO mcu-1	35	0	91				0	0
4KO mcu-1	37	0	91				0	0
4KO mcu-1	39	0	91				0	0
4KO mcu-1	41	0	91				0	0
4KO mcu-1	43	0	91				0	0
4KO mcu-1	45
WT itr-1	0	107	0				1	100
WT itr-1	5	107	0				1	100
WT itr-1	7	107	0				1	100
WT itr-1	10	107	0	0			1	100
WT itr-1	14	102	5	5			0.953271	95.3271
WT itr-1	16	95	12	7			0.88785	88.785
WT itr-1	18	83	24	12			0.775701	77.5701
WT itr-1	21	61	46	22			0.570093	57.0093
WT itr-1	23	32	75	29			0.299065	29.9065
WT itr-1	25	15	92	17			0.140187	14.0187
WT itr-1	28	5	102	10			0.046729	4.6729
WT itr-1	30	1	106	4			0.00934579	0.934579
WT itr-1	32	0	107	1			0	0
WT itr-1	35	0	107				0	0
WT itr-1	37	0	107				0	0
WT itr-1	39	0	107				0	0
WT itr-1	41	0	107				0	0
WT itr-1	43	0	107				0	0
WT itr-1	45	0	107				0	0
4OE itr-1	0	103	0				1	100
4OE itr-1	5	103	0				1	100
4OE itr-1	7	103	0				1	100
4OE itr-1	10	103	0	0			1	100
4OE itr-1	12	95	8	8			0.92233	92.233
4OE itr-1	14	88	15	7			0.854369	85.4369
4OE itr-1	17	73	30	15			0.708738	70.8738
4OE itr-1	19	48	55	25			0.466019	46.6019
4OE itr-1	21	17	86	31			0.165049	16.5049
4OE itr-1	24	7	96	10			0.0679612	6.79612
4OE itr-1	26	2	101	5			0.0194175	1.94175
4OE itr-1	28	0	103	2			0	0
4OE itr-1	31	0	103				0	0
4OE itr-1	33	0	103				0	0
4OE itr-1	35	0	103				0	0
4OE itr-1	38	0	103				0	0
4OE itr-1	40	0	103				0	0
4OE itr-1	42	0	103				0	0
4OE itr-1	45
6.3 itr-1	0	119	0				1	100
6.3 itr-1	5	119	0				1	100
6.3 itr-1	7	119	0				1	100
6.3 itr-1	10	119	0	0			1	100
6.3 itr-1	12	113	6	6			0.94958	94.958
6.3 itr-1	14	105	14	8			0.882353	88.2353
6.3 itr-1	17	90	29	15			0.756303	75.6303
6.3 itr-1	19	64	55	26			0.537815	53.7815
6.3 itr-1	21	29	90	35			0.243697	24.3697
6.3 itr-1	24	15	104	14			0.12605	12.605
6.3 itr-1	26	6	113	9			0.0504202	5.04202
6.3 itr-1	28	2	117	4			0.0168067	1.68067
6.3 itr-1	31	0	119	2			0	0
6.3 itr-1	33	0	119				0	0
6.3 itr-1	35	0	119				0	0
6.3 itr-1	38	0	119				0	0
6.3 itr-1	40	0	119				0	0
6.3 itr-1	42	0	119			0	0	0
6.3 itr-1	45
4KO itr-1	0	118	0			0	1	100
4KO itr-1	5	118	0			0	1	100
4KO itr-1	7	118	0			0	1	100
4KO itr-1	10	118	0	0		0	1	100
4KO itr-1	12	108	10	10		0	0.915254	91.5254
4KO itr-1	14	96	22	12		0	0.813559	81.3559
4KO itr-1	17	76	42	20		0	0.644068	64.4068
4KO itr-1	19	40	78	36		0	0.338983	33.8983
4KO itr-1	21	7	111	33		0	0.059322	5.9322
4KO itr-1	24	1	117	6		0	0.00847458	0.847458
4KO itr-1	26	0	118	1		0	0	0
4KO itr-1	28	0	118			0	0	0
4KO itr-1	31	0	118			0	0	0
4KO itr-1	33	0	118			0	0	0
4KO itr-1	35	0	118			0	0	0
4KO itr-1	38	0	118			0	0	0
4KO itr-1	40	0	118			0	0	0
4KO itr-1	42	0	118			0	0	0
4KO itr-1	45	118	0			0	1	100
							0
							0
1KO sams1	0	83	0			0	1	100
1KO sams1	5	83	0			0	1	100
1KO sams1	7	83	0			0	1	100
1KO sams1	9	83	0			0	1	100
1KO sams1	13	83	0			0	1	100
1KO sams1	15	83	0			0	1	100
1KO sams1	17	83	0			0	1	100
1KO sams1	20	83	0			0	1	100
1KO sams1	22	83	0			0	1	100
1KO sams1	24	83	0			0	1	100
1KO sams1	27	83	0			0	1	100
1KO sams1	29	83	0			0	1	100
1KO sams1	31	83	0			0	1	100
1KO sams1	34	83	0			0	1	100
1KO sams1	36	83	0			0	1	100
1KO sams1	38	83	0			0	1	100
1KO sams1	41	83	0			0	1	100
1KO sams1	43	83	0			0	1	100
1KO sams1	45	83	0			0	1	100
							0

## Sheet: crt1
% WT EV [120]						condition	chi	pvalue	corrected_pvalue
#days	dead	censored				WT EV v.s. fmo-4 OE EV	34.08	5.3e-09	2.6e-08
0						WT EV v.s. fmo-4 KO EV	9.58	0.002	0.0099
5						WT EV v.s. WT crt1	29.16	6.7e-08	3.3e-07
7						WT EV v.s. fmo-4 OE crt1	40.24	0	0
10	0					WT EV v.s. fmo-4 ko crt1	8.8	0.003	0.015
14	2					fmo-4 OE EV v.s. WT EV	34.08	5.3e-09	2.6e-08
16	5					fmo-4 OE EV v.s. fmo-4 KO EV	68.45	0	0
18	11					fmo-4 OE EV v.s. WT crt1	0.92	0.3381	1
21	13					fmo-4 OE EV v.s. fmo-4 OE crt1	1.06	0.3041	1
23	38					fmo-4 OE EV v.s. fmo-4 ko crt1	9.89	0.0017	0.0083
25	19					fmo-4 KO EV v.s. WT EV	9.58	0.002	0.0099
28	22					fmo-4 KO EV v.s. fmo-4 OE EV	68.45	0	0
30	8					fmo-4 KO EV v.s. WT crt1	66.93	0	0
32	2					fmo-4 KO EV v.s. fmo-4 OE crt1	73.19	0	0
35						fmo-4 KO EV v.s. fmo-4 ko crt1	32.39	1.3e-08	6.3e-08
37						WT crt1 v.s. WT EV	29.16	6.7e-08	3.3e-07
39						WT crt1 v.s. fmo-4 OE EV	0.92	0.3381	1
41						WT crt1 v.s. fmo-4 KO EV	66.93	0	0
43						WT crt1 v.s. fmo-4 OE crt1	3.64	0.0563	0.2814
45						WT crt1 v.s. fmo-4 ko crt1	6.28	0.0122	0.0609
						fmo-4 OE crt1 v.s. WT EV	40.24	0	0
% fmo-4 OE EV [98]						fmo-4 OE crt1 v.s. fmo-4 OE EV	1.06	0.3041	1
#days	dead	censored				fmo-4 OE crt1 v.s. fmo-4 KO EV	73.19	0	0
0						fmo-4 OE crt1 v.s. WT crt1	3.64	0.0563	0.2814
5						fmo-4 OE crt1 v.s. fmo-4 ko crt1	15.63	0.0001	0.0004
7						fmo-4 ko crt1 v.s. WT EV	8.8	0.003	0.015
10	0					fmo-4 ko crt1 v.s. fmo-4 OE EV	9.89	0.0017	0.0083
14	0					fmo-4 ko crt1 v.s. fmo-4 KO EV	32.39	1.3e-08	6.3e-08
16	2					fmo-4 ko crt1 v.s. WT crt1	6.28	0.0122	0.0609
18	4					fmo-4 ko crt1 v.s. fmo-4 OE crt1	15.63	0.0001	0.0004
21	6
23	13
25	19
28	18
30	19
32	9
35	3
37	5
39
41
43
45
% fmo-4 KO EV [131]
#days	dead	censored
0
5
7
10	0
14	4
16	6
18	12
21	22
23	44
25	33
28	7
30	3
32
35
37
39
41
43
45
% WT crt1 [111]
#days	dead	censored
0
5
7
10	0
14	0
16	0
18	5
21	8
23	15
25	27
28	24
30	17
32	6
35	7
37	2
39
41
43
45
% fmo-4 OE crt1 [103]
#days	dead	censored
0
5
7
10	0
14	0
16	0
18	5
21	8
23	14
25	18
28	20
30	12
32	8
35	11
37	5
39	2
41
43
45
% fmo-4 ko crt1 [108]
#days	dead	censored
0
5
7
10	0
14	0
16	1
18	8
21	8
23	27
25	28
28	16
30	9
32	7
35	4
37
39
41
43
45

## Sheet: mcu1
% WT EV [120]					condition	chi	pvalue	corrected_pvalue
#days	dead	censored			WT EV v.s. fmo-4 OE EV	34.08	5.3e-09	2.6e-08
0					WT EV v.s. fmo-4 KO EV	9.58	0.002	0.0099
5					WT EV v.s. WT mcu1	1.41	0.235	1
7					WT EV v.s. fmo-4 OE mcu1	6.92	0.0085	0.0426
10	0				WT EV v.s. fmo-4 ko mcu1	52.43	0	0
14	2				fmo-4 OE EV v.s. WT EV	34.08	5.3e-09	2.6e-08
16	5				fmo-4 OE EV v.s. fmo-4 KO EV	68.45	0	0
18	11				fmo-4 OE EV v.s. WT mcu1	44.83	0	0
21	13				fmo-4 OE EV v.s. fmo-4 OE mcu1	46.4	0	0
23	38				fmo-4 OE EV v.s. fmo-4 ko mcu1	110.09	0	0
25	19				fmo-4 KO EV v.s. WT EV	9.58	0.002	0.0099
28	22				fmo-4 KO EV v.s. fmo-4 OE EV	68.45	0	0
30	8				fmo-4 KO EV v.s. WT mcu1	3.7	0.0543	0.2717
32	2				fmo-4 KO EV v.s. fmo-4 OE mcu1	0.37	0.5446	1
35					fmo-4 KO EV v.s. fmo-4 ko mcu1	32.89	9.8e-09	4.9e-08
37					WT mcu1 v.s. WT EV	1.41	0.235	1
39					WT mcu1 v.s. fmo-4 OE EV	44.83	0	0
41					WT mcu1 v.s. fmo-4 KO EV	3.7	0.0543	0.2717
43					WT mcu1 v.s. fmo-4 OE mcu1	3.02	0.082	0.4101
45					WT mcu1 v.s. fmo-4 ko mcu1	39.31	0	0
					fmo-4 OE mcu1 v.s. WT EV	6.92	0.0085	0.0426
% fmo-4 OE EV [98]					fmo-4 OE mcu1 v.s. fmo-4 OE EV	46.4	0	0
#days	dead	censored			fmo-4 OE mcu1 v.s. fmo-4 KO EV	0.37	0.5446	1
0					fmo-4 OE mcu1 v.s. WT mcu1	3.02	0.082	0.4101
5					fmo-4 OE mcu1 v.s. fmo-4 ko mcu1	10.45	0.0012	0.0061
7					fmo-4 ko mcu1 v.s. WT EV	52.43	0	0
10	0				fmo-4 ko mcu1 v.s. fmo-4 OE EV	110.09	0	0
14	0				fmo-4 ko mcu1 v.s. fmo-4 KO EV	32.89	9.8e-09	4.9e-08
16	2				fmo-4 ko mcu1 v.s. WT mcu1	39.31	0	0
18	4				fmo-4 ko mcu1 v.s. fmo-4 OE mcu1	10.45	0.0012	0.0061
21	6
23	13
25	19
28	18
30	19
32	9
35	3
37	5
39
41
43
45
% fmo-4 KO EV [131]
#days	dead	censored
0
5
7
10	0
14	4
16	6
18	12
21	22
23	44
25	33
28	7
30	3
32
35
37
39
41
43
45
% WT mcu1 [124]
#days	dead	censored
0
5
7
10	0
14	3
16	6
18	10
21	26
23	30
25	20
28	23
30	5
32	1
35
37
39
41
43
45
% fmo-4 OE mcu1 [70]
#days	dead	censored
0
5
7
10	0
14	3
16	8
18	10
21	13
23	18
25	8
28	6
30	2
32	2
35
37
39
41
43
45
% fmo-4 ko mcu1 [91]
#days	dead	censored
0
5
7
10	0
14	5
16	11
18	17
21	27
23	26
25	4
28	1
30
32
35
37
39
41
43
45

## Sheet: itr1
% WT EV [120]						condition	chi	pvalue	corrected_pvalue
#days	dead	censored				WT EV v.s. fmo-4 OE EV	34.08	5.3e-09	2.6e-08
0						WT EV v.s. fmo-4 KO EV	9.58	0.002	0.0099
5						WT EV v.s. WT itr1	7.27	0.007	0.035
7						WT EV v.s. fmo-4 OE itr1	25.36	4.8e-07	2.4e-06
10	0					WT EV v.s. fmo-4 ko itr1	60.22	0	0
14	2					fmo-4 OE EV v.s. WT EV	34.08	5.3e-09	2.6e-08
16	5					fmo-4 OE EV v.s. fmo-4 KO EV	68.45	0	0
18	11					fmo-4 OE EV v.s. WT itr1	56.03	0	0
21	13					fmo-4 OE EV v.s. fmo-4 OE itr1	82.37	0	0
23	38					fmo-4 OE EV v.s. fmo-4 ko itr1	121.64	0	0
25	19					fmo-4 KO EV v.s. WT EV	9.58	0.002	0.0099
28	22					fmo-4 KO EV v.s. fmo-4 OE EV	68.45	0	0
30	8					fmo-4 KO EV v.s. WT itr1	0.01	0.9188	1
32	2					fmo-4 KO EV v.s. fmo-4 OE itr1	8.37	0.0038	0.019
35						fmo-4 KO EV v.s. fmo-4 ko itr1	37.86	0	0
37						WT itr1 v.s. WT EV	7.27	0.007	0.035
39						WT itr1 v.s. fmo-4 OE EV	56.03	0	0
41						WT itr1 v.s. fmo-4 KO EV	0.01	0.9188	1
43						WT itr1 v.s. fmo-4 OE itr1	5.11	0.0237	0.1186
45						WT itr1 v.s. fmo-4 ko itr1	23.67	1.1e-06	5.7e-06
						fmo-4 OE itr1 v.s. WT EV	25.36	4.8e-07	2.4e-06
% fmo-4 OE EV [98]						fmo-4 OE itr1 v.s. fmo-4 OE EV	82.37	0	0
#days	dead	censored				fmo-4 OE itr1 v.s. fmo-4 KO EV	8.37	0.0038	0.019
0						fmo-4 OE itr1 v.s. WT itr1	5.11	0.0237	0.1186
5						fmo-4 OE itr1 v.s. fmo-4 ko itr1	6.83	0.0089	0.0447
7						fmo-4 ko itr1 v.s. WT EV	60.22	0	0
10	0					fmo-4 ko itr1 v.s. fmo-4 OE EV	121.64	0	0
14	0					fmo-4 ko itr1 v.s. fmo-4 KO EV	37.86	0	0
16	2					fmo-4 ko itr1 v.s. WT itr1	23.67	1.1e-06	5.7e-06
18	4					fmo-4 ko itr1 v.s. fmo-4 OE itr1	6.83	0.0089	0.0447
21	6
23	13
25	19
28	18
30	19
32	9
35	3
37	5
39
41
43
45
% fmo-4 KO EV [131]
#days	dead	censored
0
5
7
10	0
14	4
16	6
18	12
21	22
23	44
25	33
28	7
30	3
32
35
37
39
41
43
45
% WT itr1 [107]
#days	dead	censored
0
5
7
10	0
14	5
16	7
18	12
21	22
23	29
25	17
28	10
30	4
32	1
35
37
39
41
43
45
% fmo-4 OE itr1 [103]
#days	dead	censored
0
5
7
10	0
14	8
16	7
18	15
21	25
23	31
25	10
28	5
30	2
32
35
37
39
41
43
45
% fmo-4 ko itr1 [118]
#days	dead	censored
0
5
7
10	0
14	10
16	12
18	20
21	36
23	33
25	6
28	1
30
32
35
37
39
41
43
45

## Sheet: Sheet1
#1	N2								#1	N2					#1	N2
#2	Lei42	fmo-2p::MC; unc-119p::HIF-1(P621A); JT307 #1							#2	Lei42	fmo-2p::MC; unc-119p::HIF-1(P621A); JT307 #1				#11L	Lei51	fmo-2p::MC; JT307; gcy-31; gcy-36 - XA2262 sibling #1
#3	Lei43	fmo-2p::MC; unc-119p::HIF-1(P621A); JT307 #2							#3	Lei43	fmo-2p::MC; unc-119p::HIF-1(P621A); JT307 #2				#12L	Lei52	fmo-2p::MC; JT307; gcy-33; gcy-36 - XA2262 sibling #1
#4	Lei44	fmo-2p::MC; TU3311; CB5602 #1							#4	Lei44	fmo-2p::MC; TU3311; CB5602 #1				#13	Lei53	fmo-2p::MC; JT307; gcy-33; gcy-36 - XA2262 sibling #2
#5	Lei45	fmo-2p::MC; TU3311 #1							#5	Lei45	fmo-2p::MC; TU3311 #1				#14L	Lei55	fmo-2p::MC; JT307 - XA2262 sibling #1
#6	Lei46	fmo-2p::MC; CB5602 #1							#6	Lei46	fmo-2p::MC; CB5602 #1				#15L	Lei56	fmo-2p::MC; JT307 - XA2262 sibling #2
#7	Lei47	fmo-2p::MC; TU3311; CB5602 #2							#7	Lei47	fmo-2p::MC; TU3311; CB5602 #2				#16	Lei57	fmo-2p::MC - XA2262 sibling #1
#8L	Lei48	fmo-2p::MC; JT307; XA2262 #1													#17	Lei58	fmo-2p::MC - XA2262 sibling #2
#9	Lei49	fmo-2p::MC; JT307; XA2262 #2													#18	Lei59	fmo-2p::MC; gcy-33; gcy-36 - XA2262 sibling #1
#10L	Lei50	fmo-2p::MC; JT307; XA2262 #3							#1	N2					#19	Lei60	fmo-2p::MC; gcy-33; gcy-36 - XA2262 sibling #2
#11L	Lei51	fmo-2p::MC; JT307; gcy-31; gcy-36 - XA2262 sibling #1							#8L	Lei48	fmo-2p::MC; JT307; XA2262 #1
#12L	Lei52	fmo-2p::MC; JT307; gcy-33; gcy-36 - XA2262 sibling #1							#9	Lei49	fmo-2p::MC; JT307; XA2262 #2
#13	Lei53	fmo-2p::MC; JT307; gcy-33; gcy-36 - XA2262 sibling #2							#10L	Lei50	fmo-2p::MC; JT307; XA2262 #3
#14L	Lei55	fmo-2p::MC; JT307 - XA2262 sibling #1							#14L	Lei55	fmo-2p::MC; JT307 - XA2262 sibling #1
#15L	Lei56	fmo-2p::MC; JT307 - XA2262 sibling #2							#15L	Lei56	fmo-2p::MC; JT307 - XA2262 sibling #2
#16	Lei57	fmo-2p::MC - XA2262 sibling #1							#16	Lei57	fmo-2p::MC - XA2262 sibling #1
#17	Lei58	fmo-2p::MC - XA2262 sibling #2							#17	Lei58	fmo-2p::MC - XA2262 sibling #2
#18	Lei59	fmo-2p::MC; gcy-33; gcy-36 - XA2262 sibling #1							#20	Lei61	fmo-2p::MC; XA2262 #1
#19	Lei60	fmo-2p::MC; gcy-33; gcy-36 - XA2262 sibling #2							#21	Lei62	fmo-2p::MC; XA2262 #2
#20	Lei61	fmo-2p::MC; XA2262 #1
#21	Lei62	fmo-2p::MC; XA2262 #2
