# Supplementary material for: fmo-4 promotes longevity and stress resistance via ER to mitochondria calcium regulation in C. elegans
Source: eLife journal article supplement (doi:10.7554/elife.99971), 2024-08-27
Supplement: fig6-data1 [file 17FEB2023 RNAi longevity lifespan EV CRT-1 MCU-1 ITR-1.xlsx]

## Sheet: lifespan
strain	day	alive	dead-total	dead-normal	dead-ruptured	censored	ratio-alive	percentage-alive
N2 EV	0	120	0				1	100
N2 EV	5	120	0				1	100
N2 EV	7	120	0				1	100						1	2	3	4	5	6	7	8	9	10	11	12	13	14	15
N2 EV	11	117	3	3			0.975	97.5			plot data here-->		day	WT; Empty Vector	FMO-4 OE; Empty Vector	FMO-4 KO; EV	WT; crt-1 RNAi	FMO-4 OE; crt-1 RNAi	FMO-4 KO; crt-1 RNAi	WT; mcu-1 RNAi	FMO4-OE; mcu-1 RNAi	FMO-4 KO; mcu-1 RNAi	WT; itr-1 RNAi	FMO-4 OE; itr-1 RNAi	FMO-4 KO; itr-1 RNAi
N2 EV	14	111	9	6			0.925	92.5				0	0	100	100	100	100	100	100	100	100	100	100	100	100
N2 EV	16	99	21	12			0.825	82.5				5	5	100	100	100	100	100	100	100	100	100	100	100	100
N2 EV	18	85	35	14			0.708333	70.8333				7	7	100	100	100	100	100	100	100	100	100	100	100	100
N2 EV	21	74	46	11			0.616667	61.6667				11	11	97.5	100	95.4955	100	100	99.0654	98.2609	98.3333	95	100	100	100
N2 EV	23	61	59	13			0.508333	50.8333				14	14	92.5	95.4955	88.2883	97.4138	96.6667	94.3925	91.3043	92.5	86	96.6102	95	94.0171
N2 EV	25	42	78	19			0.35	35				16	16	82.5	90.991	77.4775	93.1034	93.3333	87.8505	82.6087	83.3333	72	88.9831	90	82.906
N2 EV	28	21	99	21			0.175	17.5				18	18	70.8333	84.6847	63.964	87.069	85.8333	76.6355	72.1739	76.6667	59	74.5763	74.1667	69.2308
N2 EV	30	1	119	20			0.00833333	0.833333				21	21	61.6667	76.5766	48.6486	79.3103	77.5	65.4206	57.3913	60.8333	40	44.9153	35.8333	32.4786
N2 EV	32	0	120	1			0	0				23	23	50.8333	66.6667	42.3423	66.3793	66.6667	44.8598	45.2174	50	25	22.8814	13.3333	14.5299
N2 EV	35	0	120				0	0				25	25	35	53.1532	18.018	46.5517	48.3333	19.6262	25.2174	32.5	9	5.08475	1.66667	0.854701
N2 EV	37	0	120				0	0				28	28	17.5	34.2342	2.7027	25.8621	29.1667	4.6729	7.82609	14.1667	0	0	0	0
N2 EV	39	0	120				0	0				30	30	0.833333	17.1171	0	9.48276	13.3333	2.80374	1.73913	2.5
N2 EV	41	0	120				0	0				32	32	0	10.8108		5.17241	7.5	0.934579	0	0
N2 EV	43	0	120				0	0				35	35		4.5045		1.72414	3.33333	0
N2 EV	45	0	120				0	0				37	37		0		0	0
												39	39
4OE EV	0	111	0				1	100				41	41
4OE EV	5	111	0				1	100				43	43
4OE EV	7	111	0				1	100				45	45
4OE EV	11	111	0	0			1	100
4OE EV	14	106	5	5			0.954955	95.4955
4OE EV	16	101	10	5			0.90991	90.991
4OE EV	18	94	17	7			0.846847	84.6847
4OE EV	21	85	26	9			0.765766	76.5766
4OE EV	23	74	37	11			0.666667	66.6667
4OE EV	25	59	52	15			0.531532	53.1532
4OE EV	28	38	73	21			0.342342	34.2342
4OE EV	30	19	92	19			0.171171	17.1171
4OE EV	32	12	99	7			0.108108	10.8108
4OE EV	35	5	106	7			0.045045	4.5045
4OE EV	37	0	111	5			0	0
4OE EV	39	0	111				0	0
4OE EV	41	0	111				0	0
4OE EV	43	0	111				0	0
4OE EV	45	0	111				0	0
4KO EV	0	111	0				1	100
4KO EV	5	111	0				1	100
4KO EV	7	111	0				1	100
4KO EV	11	106	5	5			0.954955	95.4955
4KO EV	14	98	13	8			0.882883	88.2883
4KO EV	16	86	25	12			0.774775	77.4775
4KO EV	18	71	40	15			0.63964	63.964
4KO EV	21	54	57	17			0.486486	48.6486
4KO EV	23	47	64	7			0.423423	42.3423
4KO EV	25	20	91	27			0.18018	18.018
4KO EV	28	3	108	17			0.027027	2.7027
4KO EV	30	0	111	3			0	0
4KO EV	32	0	111				0	0
4KO EV	35	0	111				0	0
4KO EV	37	0	111				0	0
4KO EV	39	0	111				0	0
4KO EV	41	0	111				0	0
4KO EV	43	0	111				0	0
4KO EV	45	0	111				0	0
WT crt-1	0	116	0				1	100
WT crt-1	5	116	0				1	100
WT crt-1	7	116	0				1	100
WT crt-1	11	116	0	0			1	100
WT crt-1	14	113	3	3			0.974138	97.4138
WT crt-1	16	108	8	5			0.931034	93.1034
WT crt-1	18	101	15	7			0.87069	87.069
WT crt-1	21	92	24	9			0.793103	79.3103
WT crt-1	23	77	39	15			0.663793	66.3793
WT crt-1	25	54	62	23			0.465517	46.5517
WT crt-1	28	30	86	24			0.258621	25.8621
WT crt-1	30	11	105	19			0.0948276	9.48276
WT crt-1	32	6	110	5			0.0517241	5.17241
WT crt-1	35	2	114	4			0.0172414	1.72414
WT crt-1	37	0	116	2			0	0
WT crt-1	39	0	116				0	0
WT crt-1	41	0	116				0	0
WT crt-1	43	0	116				0	0
WT crt-1	45	0	116				0	0
4OE crt-1	0	120	0				1	100
4OE crt-1	5	120	0				1	100
4OE crt-1	7	120	0				1	100
4OE crt-1	11	120	0	0			1	100
4OE crt-1	14	116	4	4			0.966667	96.6667
4OE crt-1	16	112	8	4			0.933333	93.3333
4OE crt-1	18	103	17	9			0.858333	85.8333
4OE crt-1	21	93	27	10			0.775	77.5
4OE crt-1	23	80	40	13			0.666667	66.6667
4OE crt-1	25	58	62	22			0.483333	48.3333
4OE crt-1	28	35	85	23			0.291667	29.1667
4OE crt-1	30	16	104	19			0.133333	13.3333
4OE crt-1	32	9	111	7			0.075	7.5
4OE crt-1	35	4	116	5			0.0333333	3.33333
4OE crt-1	37	0	120	4			0	0
4OE crt-1	39	0	120				0	0
4OE crt-1	41	0	120				0	0
4OE crt-1	43	0	120				0	0
4OE crt-1	45	0	120				0	0
4KO crt-1	0	107	0				1	100
4KO crt-1	5	107	0				1	100
4KO crt-1	7	107	0				1	100
4KO crt-1	11	106	1	1			0.990654	99.0654
4KO crt-1	14	101	6	5			0.943925	94.3925
4KO crt-1	16	94	13	7			0.878505	87.8505
4KO crt-1	18	82	25	12			0.766355	76.6355
4KO crt-1	21	70	37	12			0.654206	65.4206
4KO crt-1	23	48	59	22			0.448598	44.8598
4KO crt-1	25	21	86	27			0.196262	19.6262
4KO crt-1	28	5	102	16			0.046729	4.6729
4KO crt-1	30	3	104	2			0.0280374	2.80374
4KO crt-1	32	1	106	2			0.00934579	0.934579
4KO crt-1	35	0	107	1			0	0
4KO crt-1	37	0	107				0	0
4KO crt-1	39	0	107				0	0
4KO crt-1	41	0	107				0	0
4KO crt-1	43	0	107				0	0
4KO crt-1	45	0	107				0	0
WT mcu-1	0	115	0				1	100
WT mcu-1	5	115	0				1	100
WT mcu-1	7	115	0				1	100
WT mcu-1	11	113	2	2			0.982609	98.2609
WT mcu-1	14	105	10	8			0.913043	91.3043
WT mcu-1	16	95	20	10			0.826087	82.6087
WT mcu-1	18	83	32	12			0.721739	72.1739
WT mcu-1	21	66	49	17			0.573913	57.3913
WT mcu-1	23	52	63	14			0.452174	45.2174
WT mcu-1	25	29	86	23			0.252174	25.2174
WT mcu-1	28	9	106	20			0.0782609	7.82609
WT mcu-1	30	2	113	7			0.0173913	1.73913
WT mcu-1	32	0	115	2			0	0
WT mcu-1	35	0	115				0	0
WT mcu-1	37	0	115				0	0
WT mcu-1	39	0	115				0	0
WT mcu-1	41	0	115				0	0
WT mcu-1	43	0	115				0	0
WT mcu-1	45	0	115				0	0
4OE mcu-1	0	120	0				1	100
4OE mcu-1	5	120	0				1	100
4OE mcu-1	7	120	0				1	100
4OE mcu-1	11	118	2	2			0.983333	98.3333
4OE mcu-1	14	111	9	7			0.925	92.5
4OE mcu-1	16	100	20	11			0.833333	83.3333
4OE mcu-1	18	92	28	8			0.766667	76.6667
4OE mcu-1	21	73	47	19			0.608333	60.8333
4OE mcu-1	23	60	60	13			0.5	50
4OE mcu-1	25	39	81	21			0.325	32.5
4OE mcu-1	28	17	103	22			0.141667	14.1667
4OE mcu-1	30	3	117	14			0.025	2.5
4OE mcu-1	32	0	120	3			0	0
4OE mcu-1	35	0	120				0	0
4OE mcu-1	37	0	120				0	0
4OE mcu-1	39	0	120				0	0
4OE mcu-1	41	0	120				0	0
4OE mcu-1	43	0	120				0	0
4OE mcu-1	45
4KO mcu-1	0	100	0				1	100
4KO mcu-1	5	100	0				1	100
4KO mcu-1	7	100	0				1	100
4KO mcu-1	11	95	5	5			0.95	95
4KO mcu-1	14	86	14	9			0.86	86
4KO mcu-1	16	72	28	14			0.72	72
4KO mcu-1	18	59	41	13			0.59	59
4KO mcu-1	21	40	60	19			0.4	40
4KO mcu-1	23	25	75	15			0.25	25
4KO mcu-1	25	9	91	16			0.09	9
4KO mcu-1	28	0	100	9			0	0
4KO mcu-1	30	0	100				0	0
4KO mcu-1	32	0	100				0	0
4KO mcu-1	35	0	100				0	0
4KO mcu-1	37	0	100				0	0
4KO mcu-1	39	0	100				0	0
4KO mcu-1	41	0	100				0	0
4KO mcu-1	43	0	100				0	0
4KO mcu-1	45	0	100				0	0
4KO mcu-1	47	0	100				0	0
WT itr1	0	118	0				1	100
WT itr1	5	118	0				1	100
WT itr1	7	118	0				1	100
WT itr1	11	118	0	0			1	100
WT itr1	14	114	4	4			0.966102	96.6102
WT itr1	16	105	13	9			0.889831	88.9831
WT itr1	18	88	30	17			0.745763	74.5763
WT itr1	21	53	65	35			0.449153	44.9153
WT itr1	23	27	91	26			0.228814	22.8814
WT itr1	25	6	112	21			0.0508475	5.08475
WT itr1	28	0	118	6			0	0
WT itr1	30	0	118				0	0
WT itr1	32	0	118				0	0
WT itr1	35	0	118				0	0
WT itr1	37	0	118				0	0
WT itr1	39	0	118				0	0
WT itr1	41	0	118				0	0
WT itr1	43	0	118				0	0
	45
4OE itr1	0	120	0				1	100
4OE itr1	5	120	0				1	100
4OE itr1	7	120	0				1	100
4OE itr1	11	120	0	0			1	100
4OE itr1	14	114	6	6			0.95	95
4OE itr1	16	108	12	6			0.9	90
4OE itr1	18	89	31	19			0.741667	74.1667
4OE itr1	21	43	77	46			0.358333	35.8333
4OE itr1	23	16	104	27			0.133333	13.3333
4OE itr1	25	2	118	14			0.0166667	1.66667
4OE itr1	28	0	120	2			0	0
4OE itr1	30	0	120				0	0
4OE itr1	32	0	120				0	0
4OE itr1	35	0	120				0	0
4OE itr1	37	0	120				0	0
4OE itr1	39	0	120				0	0
4OE itr1	41	0	120				0	0
4OE itr1	43	0	120				0	0
4OE itr1	45
4KO itr1	0	117	0				1	100
4KO itr1	5	117	0				1	100
4KO itr1	7	117	0				1	100
4KO itr1	11	117	0	0			1	100
4KO itr1	14	110	7	7			0.940171	94.0171
4KO itr1	16	97	20	13			0.82906	82.906
4KO itr1	18	81	36	16			0.692308	69.2308
4KO itr1	21	38	79	43			0.324786	32.4786
4KO itr1	23	17	100	21			0.145299	14.5299
4KO itr1	25	1	116	16			0.00854701	0.854701
4KO itr1	28	0	117	1			0	0
4KO itr1	30	0	117				0	0
4KO itr1	32	0	117				0	0
4KO itr1	35	0	117				0	0
4KO itr1	37	0	117				0	0
4KO itr1	39	0	117				0	0
4KO itr1	41	0	117				0	0
4KO itr1	43	0	117				0	0
4KO itr1	45

## Sheet: itr1 stats
% WT EV [120]					condition	chi	pvalue	corrected_pvalue
#days	dead	censored			WT EV v.s. fmo-4 OE EV	18.04	2.2e-05	0.0001
0					WT EV v.s. fmo-4 KO EV	10.36	0.0013	0.0064
5					WT EV v.s. WT itr1	24.53	7.3e-07	3.7e-06
7					WT EV v.s. fmo-4 OE itr1	34.5	4.3e-09	2.1e-08
11	3				WT EV v.s. fmo-4 ko itr1	37.63	0	0
14	6				fmo-4 OE EV v.s. WT EV	18.04	2.2e-05	0.0001
16	12				fmo-4 OE EV v.s. fmo-4 KO EV	43.74	0	0
18	14				fmo-4 OE EV v.s. WT itr1	67.89	0	0
21	11				fmo-4 OE EV v.s. fmo-4 OE itr1	82.43	0	0
23	13				fmo-4 OE EV v.s. fmo-4 ko itr1	85.15	0	0
25	19				fmo-4 KO EV v.s. WT EV	10.36	0.0013	0.0064
28	21				fmo-4 KO EV v.s. fmo-4 OE EV	43.74	0	0
30	20				fmo-4 KO EV v.s. WT itr1	4.39	0.0363	0.1813
32	1				fmo-4 KO EV v.s. fmo-4 OE itr1	10.88	0.001	0.0049
35					fmo-4 KO EV v.s. fmo-4 ko itr1	13.29	0.0003	0.0013
37					WT itr1 v.s. WT EV	24.53	7.3e-07	3.7e-06
39					WT itr1 v.s. fmo-4 OE EV	67.89	0	0
41					WT itr1 v.s. fmo-4 KO EV	4.39	0.0363	0.1813
43					WT itr1 v.s. fmo-4 OE itr1	2.95	0.0858	0.4292
45					WT itr1 v.s. fmo-4 ko itr1	4.92	0.0265	0.1327
					fmo-4 OE itr1 v.s. WT EV	34.5	4.3e-09	2.1e-08
% fmo-4 OE EV [111]					fmo-4 OE itr1 v.s. fmo-4 OE EV	82.43	0	0
#days	dead	censored			fmo-4 OE itr1 v.s. fmo-4 KO EV	10.88	0.001	0.0049
0					fmo-4 OE itr1 v.s. WT itr1	2.95	0.0858	0.4292
5					fmo-4 OE itr1 v.s. fmo-4 ko itr1	0.35	0.5519	1
7					fmo-4 ko itr1 v.s. WT EV	37.63	0	0
11	0				fmo-4 ko itr1 v.s. fmo-4 OE EV	85.15	0	0
14	5				fmo-4 ko itr1 v.s. fmo-4 KO EV	13.29	0.0003	0.0013
16	5				fmo-4 ko itr1 v.s. WT itr1	4.92	0.0265	0.1327
18	7				fmo-4 ko itr1 v.s. fmo-4 OE itr1	0.35	0.5519	1
21	9
23	11
25	15
28	21
30	19
32	7
35	7
37	5
39
41
43
45
% fmo-4 KO EV [111]
#days	dead	censored
0
5
7
11	5
14	8
16	12
18	15
21	17
23	7
25	27
28	17
30	3
32
35
37
39
41
43
45
% WT itr1 [118]
#days	dead	censored
0
5
7
11	0
14	4
16	9
18	17
21	35
23	26
25	21
28	6
30
32
35
37
39
41
43
45
% fmo-4 OE itr1 [120]
#days	dead	censored
0
5
7
11	0
14	6
16	6
18	19
21	46
23	27
25	14
28	2
30
32
35
37
39
41
43
45
% fmo-4 ko itr1 [117]
#days	dead	censored
0
5
7
11	0
14	7
16	13
18	16
21	43
23	21
25	16
28	1
30
32
35
37
39
41
43
45

## Sheet: crt1 stats
% WT EV [120]						condition	chi	pvalue	corrected_pvalue
#days	dead	censored				WT EV v.s. fmo-4 OE EV	18.04	2.2e-05	0.0001
0						WT EV v.s. fmo-4 KO EV	10.36	0.0013	0.0064
5						WT EV v.s. WT crt1	9.67	0.0019	0.0094
7						WT EV v.s. fmo-4 OE crt1	13.31	0.0003	0.0013
11	3					WT EV v.s. fmo-4 ko crt1	2.66	0.1028	0.5141
14	6					fmo-4 OE EV v.s. WT EV	18.04	2.2e-05	0.0001
16	12					fmo-4 OE EV v.s. fmo-4 KO EV	43.74	0	0
18	14					fmo-4 OE EV v.s. WT crt1	2.11	0.1467	0.7336
21	11					fmo-4 OE EV v.s. fmo-4 OE crt1	0.62	0.4325	1
23	13					fmo-4 OE EV v.s. fmo-4 ko crt1	29.49	5.6e-08	2.8e-07
25	19					fmo-4 KO EV v.s. WT EV	10.36	0.0013	0.0064
28	21					fmo-4 KO EV v.s. fmo-4 OE EV	43.74	0	0
30	20					fmo-4 KO EV v.s. WT crt1	35.82	2.2e-09	1.1e-08
32	1					fmo-4 KO EV v.s. fmo-4 OE crt1	39.58	0	0
35						fmo-4 KO EV v.s. fmo-4 ko crt1	2.08	0.1493	0.7463
37						WT crt1 v.s. WT EV	9.67	0.0019	0.0094
39						WT crt1 v.s. fmo-4 OE EV	2.11	0.1467	0.7336
41						WT crt1 v.s. fmo-4 KO EV	35.82	2.2e-09	1.1e-08
43						WT crt1 v.s. fmo-4 OE crt1	0.44	0.5062	1
45						WT crt1 v.s. fmo-4 ko crt1	21.82	3e-06	1.5e-05
						fmo-4 OE crt1 v.s. WT EV	13.31	0.0003	0.0013
% fmo-4 OE EV [111]						fmo-4 OE crt1 v.s. fmo-4 OE EV	0.62	0.4325	1
#days	dead	censored				fmo-4 OE crt1 v.s. fmo-4 KO EV	39.58	0	0
0						fmo-4 OE crt1 v.s. WT crt1	0.44	0.5062	1
5						fmo-4 OE crt1 v.s. fmo-4 ko crt1	25.2	5.2e-07	2.6e-06
7						fmo-4 ko crt1 v.s. WT EV	2.66	0.1028	0.5141
11	0					fmo-4 ko crt1 v.s. fmo-4 OE EV	29.49	5.6e-08	2.8e-07
14	5					fmo-4 ko crt1 v.s. fmo-4 KO EV	2.08	0.1493	0.7463
16	5					fmo-4 ko crt1 v.s. WT crt1	21.82	3e-06	1.5e-05
18	7					fmo-4 ko crt1 v.s. fmo-4 OE crt1	25.2	5.2e-07	2.6e-06
21	9
23	11
25	15
28	21
30	19
32	7
35	7
37	5
39
41
43
45
% fmo-4 KO EV [111]
#days	dead	censored
0
5
7
11	5
14	8
16	12
18	15
21	17
23	7
25	27
28	17
30	3
32
35
37
39
41
43
45
% WT crt1 [116]
#days	dead	censored
0
5
7
11	0
14	3
16	5
18	7
21	9
23	15
25	23
28	24
30	19
32	5
35	4
37	2
39
41
43
45
% fmo-4 OE crt1 [120]
#days	dead	censored
0
5
7
11	0
14	4
16	4
18	9
21	10
23	13
25	22
28	23
30	19
32	7
35	5
37	4
39
41
43
45
% fmo-4 ko crt1 [107]
#days	dead	censored
0
5
7
11	1
14	5
16	7
18	12
21	12
23	22
25	27
28	16
30	2
32	2
35	1
37
39
41
43
45

## Sheet: mcu1 stats
% WT EV [120]					condition	chi	pvalue	corrected_pvalue
#days	dead	censored			WT EV v.s. fmo-4 OE EV	18.04	2.2e-05	0.0001
0					WT EV v.s. fmo-4 KO EV	10.36	0.0013	0.0064
5					WT EV v.s. WT mcu1	2.39	0.1224	0.6121
7					WT EV v.s. fmo-4 OE mcu1	0.03	0.8519	1
11	3				WT EV v.s. fmo-4 ko mcu1	25.82	3.8e-07	1.9e-06
14	6				fmo-4 OE EV v.s. WT EV	18.04	2.2e-05	0.0001
16	12				fmo-4 OE EV v.s. fmo-4 KO EV	43.74	0	0
18	14				fmo-4 OE EV v.s. WT mcu1	29.7	5e-08	2.5e-07
21	11				fmo-4 OE EV v.s. fmo-4 OE mcu1	19.98	7.8e-06	3.9e-05
23	13				fmo-4 OE EV v.s. fmo-4 ko mcu1	64.92	0	0
25	19				fmo-4 KO EV v.s. WT EV	10.36	0.0013	0.0064
28	21				fmo-4 KO EV v.s. fmo-4 OE EV	43.74	0	0
30	20				fmo-4 KO EV v.s. WT mcu1	2.73	0.0982	0.491
32	1				fmo-4 KO EV v.s. fmo-4 OE mcu1	8.98	0.0027	0.0136
35					fmo-4 KO EV v.s. fmo-4 ko mcu1	5.64	0.0176	0.0878
37					WT mcu1 v.s. WT EV	2.39	0.1224	0.6121
39					WT mcu1 v.s. fmo-4 OE EV	29.7	5e-08	2.5e-07
41					WT mcu1 v.s. fmo-4 KO EV	2.73	0.0982	0.491
43					WT mcu1 v.s. fmo-4 OE mcu1	1.79	0.1811	0.9056
45					WT mcu1 v.s. fmo-4 ko mcu1	14.54	0.0001	0.0007
					fmo-4 OE mcu1 v.s. WT EV	0.03	0.8519	1
% fmo-4 OE EV [111]					fmo-4 OE mcu1 v.s. fmo-4 OE EV	19.98	7.8e-06	3.9e-05
#days	dead	censored			fmo-4 OE mcu1 v.s. fmo-4 KO EV	8.98	0.0027	0.0136
0					fmo-4 OE mcu1 v.s. WT mcu1	1.79	0.1811	0.9056
5					fmo-4 OE mcu1 v.s. fmo-4 ko mcu1	24.62	7e-07	3.5e-06
7					fmo-4 ko mcu1 v.s. WT EV	25.82	3.8e-07	1.9e-06
11	0				fmo-4 ko mcu1 v.s. fmo-4 OE EV	64.92	0	0
14	5				fmo-4 ko mcu1 v.s. fmo-4 KO EV	5.64	0.0176	0.0878
16	5				fmo-4 ko mcu1 v.s. WT mcu1	14.54	0.0001	0.0007
18	7				fmo-4 ko mcu1 v.s. fmo-4 OE mcu1	24.62	7e-07	3.5e-06
21	9
23	11
25	15
28	21
30	19
32	7
35	7
37	5
39
41
43
45
% fmo-4 KO EV [111]
#days	dead	censored
0
5
7
11	5
14	8
16	12
18	15
21	17
23	7
25	27
28	17
30	3
32
35
37
39
41
43
45
% WT mcu1 [115]
#days	dead	censored
0
5
7
11	2
14	8
16	10
18	12
21	17
23	14
25	23
28	20
30	7
32	2
35
37
39
41
43
45
% fmo-4 OE mcu1 [120]
#days	dead	censored
0
5
7
11	2
14	7
16	11
18	8
21	19
23	13
25	21
28	22
30	14
32	3
35
37
39
41
43
45
% fmo-4 ko mcu1 [100]
#days	dead	censored
0
5
7
11	5
14	9
16	14
18	13
21	19
23	15
25	16
28	9
30
32
35
37
39
41
43
45

## Sheet: Sheet1
#1	N2								#1	N2					#1	N2
#2	Lei42	fmo-2p::MC; unc-119p::HIF-1(P621A); JT307 #1							#2	Lei42	fmo-2p::MC; unc-119p::HIF-1(P621A); JT307 #1				#11L	Lei51	fmo-2p::MC; JT307; gcy-31; gcy-36 - XA2262 sibling #1
#3	Lei43	fmo-2p::MC; unc-119p::HIF-1(P621A); JT307 #2							#3	Lei43	fmo-2p::MC; unc-119p::HIF-1(P621A); JT307 #2				#12L	Lei52	fmo-2p::MC; JT307; gcy-33; gcy-36 - XA2262 sibling #1
#4	Lei44	fmo-2p::MC; TU3311; CB5602 #1							#4	Lei44	fmo-2p::MC; TU3311; CB5602 #1				#13	Lei53	fmo-2p::MC; JT307; gcy-33; gcy-36 - XA2262 sibling #2
#5	Lei45	fmo-2p::MC; TU3311 #1							#5	Lei45	fmo-2p::MC; TU3311 #1				#14L	Lei55	fmo-2p::MC; JT307 - XA2262 sibling #1
#6	Lei46	fmo-2p::MC; CB5602 #1							#6	Lei46	fmo-2p::MC; CB5602 #1				#15L	Lei56	fmo-2p::MC; JT307 - XA2262 sibling #2
#7	Lei47	fmo-2p::MC; TU3311; CB5602 #2							#7	Lei47	fmo-2p::MC; TU3311; CB5602 #2				#16	Lei57	fmo-2p::MC - XA2262 sibling #1
#8L	Lei48	fmo-2p::MC; JT307; XA2262 #1													#17	Lei58	fmo-2p::MC - XA2262 sibling #2
#9	Lei49	fmo-2p::MC; JT307; XA2262 #2													#18	Lei59	fmo-2p::MC; gcy-33; gcy-36 - XA2262 sibling #1
#10L	Lei50	fmo-2p::MC; JT307; XA2262 #3							#1	N2					#19	Lei60	fmo-2p::MC; gcy-33; gcy-36 - XA2262 sibling #2
#11L	Lei51	fmo-2p::MC; JT307; gcy-31; gcy-36 - XA2262 sibling #1							#8L	Lei48	fmo-2p::MC; JT307; XA2262 #1
#12L	Lei52	fmo-2p::MC; JT307; gcy-33; gcy-36 - XA2262 sibling #1							#9	Lei49	fmo-2p::MC; JT307; XA2262 #2
#13	Lei53	fmo-2p::MC; JT307; gcy-33; gcy-36 - XA2262 sibling #2							#10L	Lei50	fmo-2p::MC; JT307; XA2262 #3
#14L	Lei55	fmo-2p::MC; JT307 - XA2262 sibling #1							#14L	Lei55	fmo-2p::MC; JT307 - XA2262 sibling #1
#15L	Lei56	fmo-2p::MC; JT307 - XA2262 sibling #2							#15L	Lei56	fmo-2p::MC; JT307 - XA2262 sibling #2
#16	Lei57	fmo-2p::MC - XA2262 sibling #1							#16	Lei57	fmo-2p::MC - XA2262 sibling #1
#17	Lei58	fmo-2p::MC - XA2262 sibling #2							#17	Lei58	fmo-2p::MC - XA2262 sibling #2
#18	Lei59	fmo-2p::MC; gcy-33; gcy-36 - XA2262 sibling #1							#20	Lei61	fmo-2p::MC; XA2262 #1
#19	Lei60	fmo-2p::MC; gcy-33; gcy-36 - XA2262 sibling #2							#21	Lei62	fmo-2p::MC; XA2262 #2
#20	Lei61	fmo-2p::MC; XA2262 #1
#21	Lei62	fmo-2p::MC; XA2262 #2
