# Supplementary material for: fmo-4 promotes longevity and stress resistance via ER to mitochondria calcium regulation in C. elegans
Source: eLife journal article supplement (doi:10.7554/elife.99971), 2024-08-27
Supplement: fig6-data1 [file elife-99971-fig6-data1-v1.zip]

## Sheet: lifespan
strain	day	alive	dead-total	dead-normal	dead-ruptured	censored	ratio-alive	percentage-alive
N2 EV	0	123	0				1	100
N2 EV	5	123	0				1	100
N2 EV	7	123	0				1	100						1	2	3	4	5	6	7	8	9	10	11	12	13	14	15
N2 EV	10	123	0	0			1	100			plot data here-->		day	WT; Empty Vector	FMO-4 OE; Empty Vector	FMO-4 KO; Empty Vector	WT; crt-1 RNAi	FMO-4 OE; crt-1 RNAi	FMO-4 KO; crt-1 RNAi	WT; ckb-2	4OE; ckb-2	4KO; ckb-2	WT; dhs-28	4OE; dhs-28	4KO; dhs-28
N2 EV	12	123	0	0			1	100				0	0	100	100	100	100	100	100	100	100	100	100	100	100
N2 EV	14	120	3	3			0.97561	97.561				5	5	100	100	100	100	100	100	100	100	100	100	100	100
N2 EV	17	112	11	8			0.910569	91.0569				7	7	100	100	100	100	100	100	100	100	100	100	100	100
N2 EV	19	98	25	14			0.796748	79.6748				10	10	100	100	100	100	100	100	100	100	100	100	100	100
N2 EV	21	83	40	15			0.674797	67.4797				12	12	100	100	96.2264	100	97.4684	95.2381	100	100	95.283	100	98.1481	97.4576
N2 EV	24	67	56	16			0.544715	54.4715				14	14	97.561	98.2759	91.5094	98.1481	92.4051	89.5238	98.3333	95.8333	87.7358	97.4138	94.4444	93.2203
N2 EV	26	49	74	18			0.398374	39.8374				17	17	91.0569	93.1034	81.1321	91.6667	86.0759	78.0952	97.5	89.5833	75.4717	93.1034	87.037	87.2881
N2 EV	28	29	94	20			0.235772	23.5772				19	19	79.6748	84.4828	65.0943	83.3333	77.2152	63.8095	92.5	66.6667	53.7736	88.7931	66.6667	77.1186
N2 EV	31	6	117	23			0.0487805	4.87805				21	21	67.4797	72.4138	48.1132	77.7778	70.8861	42.8571	89.1667	56.25	30.1887	81.8966	61.1111	72.8814
N2 EV	33	0	123	6			0	0				24	24	54.4715	60.3448	33.0189	71.2963	62.0253	29.5238	80.8333	50	15.0943	70.6897	44.4444	64.4068
N2 EV	35	0	123				0	0				26	26	39.8374	51.7241	22.6415	58.3333	58.2278	20	70.8333	47.9167	6.60377	52.5862	22.2222	60.1695
N2 EV	38	0	123				0	0				28	28	23.5772	43.1034	9.43396	49.0741	50.6329	10.4762	58.3333	41.6667	0.943396	32.7586	16.6667	38.1356
N2 EV	40	0	123				0	0				31	31	4.87805	29.3103	4.71698	36.1111	37.9747	4.7619	39.1667	31.25	0	4.31034	3.7037	14.4068
N2 EV	42	0	123				0	0				33	33	0	18.9655	0	24.0741	24.0506	0	25	18.75		0	1.85185	0
N2 EV	45	0	123				0	0				35	35		10.3448		9.25926	8.86076		12.5	14.5833			0
												38	38		5.17241		1.85185	2.53165
4OE EV	0	58	0				1	100				40	40		0		0	0
4OE EV	5	58	0				1	100				42	42
4OE EV	7	58	0				1	100				45	45
4OE EV	10	58	0	0			1	100
4OE EV	12	58	0	0			1	100
4OE EV	14	57	1	1			0.982759	98.2759
4OE EV	17	54	4	3			0.931034	93.1034
4OE EV	19	49	9	5			0.844828	84.4828
4OE EV	21	42	16	7			0.724138	72.4138
4OE EV	24	35	23	7			0.603448	60.3448
4OE EV	26	30	28	5			0.517241	51.7241
4OE EV	28	25	33	5			0.431034	43.1034
4OE EV	31	17	41	8			0.293103	29.3103
4OE EV	33	11	47	6			0.189655	18.9655
4OE EV	35	6	52	5			0.103448	10.3448
4OE EV	38	3	55	3			0.0517241	5.17241
4OE EV	40	0	58	3			0	0
4OE EV	42	0	58				0	0
4OE EV	45	0	58				0	0
4KO EV	0	106	0				1	100
4KO EV	5	106	0				1	100
4KO EV	7	106	0				1	100
4KO EV	10	106	0	0			1	100
4KO EV	12	102	4	4			0.962264	96.2264
4KO EV	14	97	9	5			0.915094	91.5094
4KO EV	17	86	20	11			0.811321	81.1321
4KO EV	19	69	37	17			0.650943	65.0943
4KO EV	21	51	55	18			0.481132	48.1132
4KO EV	24	35	71	16			0.330189	33.0189
4KO EV	26	24	82	11			0.226415	22.6415
4KO EV	28	10	96	14			0.0943396	9.43396
4KO EV	31	5	101	5			0.0471698	4.71698
4KO EV	33	0	106	5			0	0
4KO EV	35	0	106				0	0
4KO EV	38	0	106				0	0
4KO EV	40	0	106				0	0
4KO EV	42	0	106				0	0
4KO EV	45	0	106				0	0
WT crt-1	0	108	0				1	100
WT crt-1	5	108	0				1	100
WT crt-1	7	108	0				1	100
WT crt-1	10	108	0	0			1	100
WT crt-1	12	108	0	0			1	100
WT crt-1	14	106	2	2			0.981481	98.1481
WT crt-1	17	99	9	7			0.916667	91.6667
WT crt-1	19	90	18	9			0.833333	83.3333
WT crt-1	21	84	24	6			0.777778	77.7778
WT crt-1	24	77	31	7			0.712963	71.2963
WT crt-1	26	63	45	14			0.583333	58.3333
WT crt-1	28	53	55	10			0.490741	49.0741
WT crt-1	31	39	69	14			0.361111	36.1111
WT crt-1	33	26	82	13			0.240741	24.0741
WT crt-1	35	10	98	16			0.0925926	9.25926
WT crt-1	38	2	106	8			0.0185185	1.85185
WT crt-1	40	0	108	2			0	0
WT crt-1	42	0	108				0	0
WT crt-1	45	0	108				0	0
4OE crt-1	0	79	0				1	100
4OE crt-1	5	79	0				1	100
4OE crt-1	7	79	0				1	100
4OE crt-1	10	79	0	0			1	100
4OE crt-1	12	77	2	2			0.974684	97.4684
4OE crt-1	14	73	6	4			0.924051	92.4051
4OE crt-1	17	68	11	5			0.860759	86.0759
4OE crt-1	19	61	18	7			0.772152	77.2152
4OE crt-1	21	56	23	5			0.708861	70.8861
4OE crt-1	24	49	30	7			0.620253	62.0253
4OE crt-1	26	46	33	3			0.582278	58.2278
4OE crt-1	28	40	39	6			0.506329	50.6329
4OE crt-1	31	30	49	10			0.379747	37.9747
4OE crt-1	33	19	60	11			0.240506	24.0506
4OE crt-1	35	7	72	12			0.0886076	8.86076
4OE crt-1	38	2	77	5			0.0253165	2.53165
4OE crt-1	40	0	79	2			0	0
4OE crt-1	42	0	79				0	0
4OE crt-1	45	0	79				0	0
4KO crt-1	0	105	0				1	100
4KO crt-1	5	105	0				1	100
4KO crt-1	7	105	0				1	100
4KO crt-1	10	105	0	0			1	100
4KO crt-1	12	100	5	5			0.952381	95.2381
4KO crt-1	14	94	11	6			0.895238	89.5238
4KO crt-1	17	82	23	12			0.780952	78.0952
4KO crt-1	19	67	38	15			0.638095	63.8095
4KO crt-1	21	45	60	22			0.428571	42.8571
4KO crt-1	24	31	74	14			0.295238	29.5238
4KO crt-1	26	21	84	10			0.2	20
4KO crt-1	28	11	94	10			0.104762	10.4762
4KO crt-1	31	5	100	6			0.047619	4.7619
4KO crt-1	33	0	105	5			0	0
4KO crt-1	35	0	105				0	0
4KO crt-1	38	0	105				0	0
4KO crt-1	40	0	105				0	0
4KO crt-1	42	0	105				0	0
4KO crt-1	45	0	105				0	0
WT ckb2	0	120	0				1	100
WT ckb2	5	120	0				1	100
WT ckb2	7	120	0				1	100
WT ckb2	10	120	0	0			1	100
WT ckb2	12	120	0	0			1	100
WT ckb2	14	118	2	2			0.983333	98.3333
WT ckb2	17	117	3	1			0.975	97.5
WT ckb2	19	111	9	6			0.925	92.5
WT ckb2	21	107	13	4			0.891667	89.1667
WT ckb2	24	97	23	10			0.808333	80.8333
WT ckb2	26	85	35	12			0.708333	70.8333
WT ckb2	28	70	50	15			0.583333	58.3333
WT ckb2	31	47	73	23			0.391667	39.1667
WT ckb2	33	30	90	17			0.25	25
WT ckb2	35	15	105	15			0.125	12.5
WT ckb2	38	15	105				0.125	12.5
WT ckb2	40	15	105				0.125	12.5
WT ckb2	42	15	105				0.125	12.5
WT ckb2	45	15	105				0.125	12.5
4OE ckb2	0	48	0				1	100
4OE ckb2	5	48	0				1	100
4OE ckb2	7	48	0				1	100
4OE ckb2	10	48	0	0			1	100
4OE ckb2	12	48	0	0			1	100
4OE ckb2	14	46	2	2			0.958333	95.8333
4OE ckb2	17	43	5	3			0.895833	89.5833
4OE ckb2	19	32	16	11			0.666667	66.6667
4OE ckb2	21	27	21	5			0.5625	56.25
4OE ckb2	24	24	24	3			0.5	50
4OE ckb2	26	23	25	1			0.479167	47.9167
4OE ckb2	28	20	28	3			0.416667	41.6667
4OE ckb2	31	15	33	5			0.3125	31.25
4OE ckb2	33	9	39	6			0.1875	18.75
4OE ckb2	35	7	41	2			0.145833	14.5833
4OE ckb2	38	7	41				0.145833	14.5833
4OE ckb2	40	7	41				0.145833	14.5833
4OE ckb2	42	7	41				0.145833	14.5833
4OE ckb2	45
4KO ckb2	0	106	0				1	100
4KO ckb2	5	106	0				1	100
4KO ckb2	7	106	0				1	100
4KO ckb2	10	106	0	0			1	100
4KO ckb2	12	101	5	5			0.95283	95.283
4KO ckb2	14	93	13	8			0.877358	87.7358
4KO ckb2	17	80	26	13			0.754717	75.4717
4KO ckb2	19	57	49	23			0.537736	53.7736
4KO ckb2	21	32	74	25			0.301887	30.1887
4KO ckb2	24	16	90	16			0.150943	15.0943
4KO ckb2	26	7	99	9			0.0660377	6.60377
4KO ckb2	28	1	105	6			0.00943396	0.943396
4KO ckb2	31	0	106	1			0	0
4KO ckb2	33	0	106				0	0
4KO ckb2	35	0	106				0	0
4KO ckb2	38	0	106				0	0
4KO ckb2	40	0	106				0	0
4KO ckb2	42	0	106				0	0
4KO ckb2	45	0	106				0	0
4KO ckb2	47	0	106				0	0
WT dhs28	0	116	0				1	100
WT dhs28	5	116	0				1	100
WT dhs28	7	116	0				1	100
WT dhs28	10	116	0	0			1	100
WT dhs28	12	116	0	0			1	100
WT dhs28	14	113	3	3			0.974138	97.4138
WT dhs28	17	108	8	5			0.931034	93.1034
WT dhs28	19	103	13	5			0.887931	88.7931
WT dhs28	21	95	21	8			0.818966	81.8966
WT dhs28	24	82	34	13			0.706897	70.6897
WT dhs28	26	61	55	21			0.525862	52.5862
WT dhs28	28	38	78	23			0.327586	32.7586
WT dhs28	31	5	111	33			0.0431034	4.31034
WT dhs28	33	0	116	5			0	0
WT dhs28	35	0	116				0	0
WT dhs28	38	0	116				0	0
WT dhs28	40	0	116				0	0
WT dhs28	42	0	116				0	0
	45
4OE dhs28	0	54	0				1	100
4OE dhs28	5	54	0				1	100
4OE dhs28	7	54	0				1	100
4OE dhs28	10	54	0	0			1	100
4OE dhs28	12	53	1	1			0.981481	98.1481
4OE dhs28	14	51	3	2			0.944444	94.4444
4OE dhs28	17	47	7	4			0.87037	87.037
4OE dhs28	19	36	18	11			0.666667	66.6667
4OE dhs28	21	33	21	3			0.611111	61.1111
4OE dhs28	24	24	30	9			0.444444	44.4444
4OE dhs28	26	12	42	12			0.222222	22.2222
4OE dhs28	28	9	45	3			0.166667	16.6667
4OE dhs28	31	2	52	7			0.037037	3.7037
4OE dhs28	33	1	53	1			0.0185185	1.85185
4OE dhs28	35	0	54	1			0	0
4OE dhs28	38	0	54				0	0
4OE dhs28	40	0	54				0	0
4OE dhs28	42	0	54				0	0
4OE dhs28	45
4KO dhs28	0	118	0				1	100
4KO dhs28	5	118	0				1	100
4KO dhs28	7	118	0				1	100
4KO dhs28	10	118	0	0			1	100
4KO dhs28	12	115	3	3			0.974576	97.4576
4KO dhs28	14	110	8	5			0.932203	93.2203
4KO dhs28	17	103	15	7			0.872881	87.2881
4KO dhs28	19	91	27	12			0.771186	77.1186
4KO dhs28	21	86	32	5			0.728814	72.8814
4KO dhs28	24	76	42	10			0.644068	64.4068
4KO dhs28	26	71	47	5			0.601695	60.1695
4KO dhs28	28	45	73	26			0.381356	38.1356
4KO dhs28	31	17	101	28			0.144068	14.4068
4KO dhs28	33	0	118	17			0	0
4KO dhs28	35	0	118				0	0
4KO dhs28	38	0	118				0	0
4KO dhs28	40	0	118				0	0
4KO dhs28	42	0	118				0	0
4KO dhs28	45
WT rsks1	0	119	0				1	100
WT rsks1	5	119	0				1	100
WT rsks1	7	119	0				1	100
WT rsks1	10	119	0				1	100
WT rsks1	12	119	0				1	100
WT rsks1	14	119	0				1	100
WT rsks1	17	119	0				1	100
WT rsks1	19	119	0				1	100
WT rsks1	21	119	0				1	100
WT rsks1	24	119	0				1	100
WT rsks1	26	119	0				1	100
WT rsks1	28	119	0				1	100
WT rsks1	31	119	0				1	100
WT rsks1	33	119	0				1	100
WT rsks1	35	119	0				1	100
WT rsks1	38	119	0				1	100
WT rsks1	40	119	0				1	100
WT rsks1	42	119	0				1	100
WT rsks1	45	119	0				1	100
4OE rsks1	0	70	0				1	100
4OE rsks1	5	70	0				1	100
4OE rsks1	7	70	0				1	100
4OE rsks1	10	70	0				1	100
4OE rsks1	12	70	0				1	100
4OE rsks1	14	70	0				1	100
4OE rsks1	17	70	0				1	100
4OE rsks1	19	70	0				1	100
4OE rsks1	21	70	0				1	100
4OE rsks1	24	70	0				1	100
4OE rsks1	26	70	0				1	100
4OE rsks1	28	70	0				1	100
4OE rsks1	31	70	0				1	100
4OE rsks1	33	70	0				1	100
4OE rsks1	35	70	0				1	100
4OE rsks1	38	70	0				1	100
4OE rsks1	40	70	0				1	100
4OE rsks1	42	70	0				1	100
4OE rsks1	45
4KO rsks1	0	113	0				1	100
4KO rsks1	5	113	0				1	100
4KO rsks1	7	113	0				1	100
4KO rsks1	10	113	0				1	100
4KO rsks1	12	113	0				1	100
4KO rsks1	14	113	0				1	100
4KO rsks1	17	113	0				1	100
4KO rsks1	19	113	0				1	100
4KO rsks1	21	113	0				1	100
4KO rsks1	24	113	0				1	100
4KO rsks1	26	113	0				1	100
4KO rsks1	28	113	0				1	100
4KO rsks1	31	113	0				1	100
4KO rsks1	33	113	0				1	100
4KO rsks1	35	113	0				1	100
4KO rsks1	38	113	0				1	100
4KO rsks1	40	113	0				1	100
4KO rsks1	42	113	0			0	1	100
4KO rsks1	45
4KO sams1	0	83	0			0	1	100
4KO sams1	5	83	0			0	1	100
4KO sams1	7	83	0			0	1	100
4KO sams1	10	83	0			0	1	100
4KO sams1	12	83	0			0	1	100
4KO sams1	14	83	0			0	1	100
4KO sams1	17	83	0			0	1	100
4KO sams1	19	83	0			0	1	100
4KO sams1	21	83	0			0	1	100
4KO sams1	24	83	0			0	1	100
4KO sams1	26	83	0			0	1	100
4KO sams1	28	83	0			0	1	100
4KO sams1	31	83	0			0	1	100
4KO sams1	33	83	0			0	1	100
4KO sams1	35	83	0			0	1	100
4KO sams1	38	83	0			0	1	100
4KO sams1	40	83	0			0	1	100
4KO sams1	42	83	0			0	1	100
4KO sams1	45	134	0			0	1	100
1OE sams1	0	114	0			0	1	100
1OE sams1	5	114	0			0	1	100
1OE sams1	7	114	0			0	1	100
1OE sams1	10	114	0			0	1	100
1OE sams1	12	114	0			0	1	100
1OE sams1	14	114	0			0	1	100
1OE sams1	17	114	0			0	1	100
1OE sams1	19	114	0			0	1	100
1OE sams1	21	114	0			0	1	100
1OE sams1	24	114	0			0	1	100
1OE sams1	26	114	0			0	1	100
1OE sams1	28	114	0			0	1	100
1OE sams1	31	114	0			0	1	100
1OE sams1	33	114	0			0	1	100
1OE sams1	35	114	0			0	1	100
1OE sams1	38	114	0			0	1	100
1OE sams1	40	114	0			0	1	100
1OE sams1	42	114	0			0	1	100
1OE sams1	45	114	0			0	1	100
1KO sams1	0	83	0			0	1	100
1KO sams1	5	83	0			0	1	100
1KO sams1	7	83	0			0	1	100
1KO sams1	9	83	0			0	1	100
1KO sams1	13	83	0			0	1	100
1KO sams1	15	83	0			0	1	100
1KO sams1	17	83	0			0	1	100
1KO sams1	20	83	0			0	1	100
1KO sams1	22	83	0			0	1	100
1KO sams1	24	83	0			0	1	100
1KO sams1	27	83	0			0	1	100
1KO sams1	29	83	0			0	1	100
1KO sams1	31	83	0			0	1	100
1KO sams1	34	83	0			0	1	100
1KO sams1	36	83	0			0	1	100
1KO sams1	38	83	0			0	1	100
1KO sams1	41	83	0			0	1	100
1KO sams1	43	83	0			0	1	100
1KO sams1	45	83	0			0	1	100
							0

## Sheet: crt1
% WT EV [123]						condition	chi	pvalue	corrected_pvalue
#days	dead	censored				WT EV v.s. fmo-4 OE EV	13.88	0.0002	0.001
0						WT EV v.s. fmo-4 KO EV	10.43	0.0012	0.0062
5						WT EV v.s. WT crt1	31.35	2.2e-08	1.1e-07
7						WT EV v.s. fmo-4 OE crt1	24.03	9.5e-07	4.7e-06
10	0					WT EV v.s. fmo-4 ko crt1	12.57	0.0004	0.002
12	0					fmo-4 OE EV v.s. WT EV	13.88	0.0002	0.001
14	3					fmo-4 OE EV v.s. fmo-4 KO EV	26.97	2.1e-07	1e-06
17	8					fmo-4 OE EV v.s. WT crt1	0.2	0.6545	1
19	14					fmo-4 OE EV v.s. fmo-4 OE crt1	0.06	0.8124	1
21	15					fmo-4 OE EV v.s. fmo-4 ko crt1	28.9	7.6e-08	3.8e-07
24	16					fmo-4 KO EV v.s. WT EV	10.43	0.0012	0.0062
26	18					fmo-4 KO EV v.s. fmo-4 OE EV	26.97	2.1e-07	1e-06
28	20					fmo-4 KO EV v.s. WT crt1	52.47	0	0
31	23					fmo-4 KO EV v.s. fmo-4 OE crt1	37.51	0	0
33	6					fmo-4 KO EV v.s. fmo-4 ko crt1	0.18	0.6738	1
35						WT crt1 v.s. WT EV	31.35	2.2e-08	1.1e-07
38						WT crt1 v.s. fmo-4 OE EV	0.2	0.6545	1
40						WT crt1 v.s. fmo-4 KO EV	52.47	0	0
42						WT crt1 v.s. fmo-4 OE crt1	0.03	0.8728	1
45						WT crt1 v.s. fmo-4 ko crt1	55.46	0	0
						fmo-4 OE crt1 v.s. WT EV	24.03	9.5e-07	4.7e-06
% fmo-4 OE EV [58]						fmo-4 OE crt1 v.s. fmo-4 OE EV	0.06	0.8124	1
#days	dead	censored				fmo-4 OE crt1 v.s. fmo-4 KO EV	37.51	0	0
0						fmo-4 OE crt1 v.s. WT crt1	0.03	0.8728	1
5						fmo-4 OE crt1 v.s. fmo-4 ko crt1	39.33	0	0
7						fmo-4 ko crt1 v.s. WT EV	12.57	0.0004	0.002
10	0					fmo-4 ko crt1 v.s. fmo-4 OE EV	28.9	7.6e-08	3.8e-07
12	0					fmo-4 ko crt1 v.s. fmo-4 KO EV	0.18	0.6738	1
14	1					fmo-4 ko crt1 v.s. WT crt1	55.46	0	0
17	3					fmo-4 ko crt1 v.s. fmo-4 OE crt1	39.33	0	0
19	5
21	7
24	7
26	5
28	5
31	8
33	6
35	5
38	3
40	3
42
45
% fmo-4 KO EV [106]
#days	dead	censored
0
5
7
10	0
12	4
14	5
17	11
19	17
21	18
24	16
26	11
28	14
31	5
33	5
35
38
40
42
45
% WT crt1 [108]
#days	dead	censored
0
5
7
10	0
12	0
14	2
17	7
19	9
21	6
24	7
26	14
28	10
31	14
33	13
35	16
38	8
40	2
42
45
% fmo-4 OE crt1 [79]
#days	dead	censored
0
5
7
10	0
12	2
14	4
17	5
19	7
21	5
24	7
26	3
28	6
31	10
33	11
35	12
38	5
40	2
42
45
% fmo-4 ko crt1 [105]
#days	dead	censored
0
5
7
10	0
12	5
14	6
17	12
19	15
21	22
24	14
26	10
28	10
31	6
33	5
35
38
40
42
45

## Sheet: daf2 stats
% WT EV [119]					condition	chi	pvalue	corrected_pvalue
#days	dead	censored			WT EV v.s. WT daf2	145.16	0	0	****
0					WT EV v.s. 4OE daf2	187.13	0	0	****
5					WT EV v.s. fmo-4 KO daf2	39.59	0	0	****
7					WT daf2 v.s. WT EV	145.16	0	0
9	0				WT daf2 v.s. 4OE daf2	5.99	0.0144	0.0432
13	5				WT daf2 v.s. fmo-4 KO daf2	10.01	0.0016	0.0047
15	1				4OE daf2 v.s. WT EV	187.13	0	0
17	4				4OE daf2 v.s. WT daf2	5.99	0.0144	0.0432
20	11				4OE daf2 v.s. fmo-4 KO daf2	26.68	2.4e-07	7.2e-07
22	16				fmo-4 KO daf2 v.s. WT EV	39.59	0	0
24	20				fmo-4 KO daf2 v.s. WT daf2	10.01	0.0016	0.0047
27	35				fmo-4 KO daf2 v.s. 4OE daf2	26.68	2.4e-07	7.2e-07
29	17
31	9
34	1
36
38
41
43
45
% WT daf2 [109]
#days	dead	censored
0
5
7
9
13	2
15	0
17	0
20	1
22	2
24	5
27	4
29	11
31	10
34	26
36	21
38	15
41	7
43	5
45
% 4OE daf2 [116]
#days	dead	censored
0
5
7
9	0
13	0
15	0
17	0
20	1
22	2
24	2
27	3
29	9
31	10
34	30
36	18
38	10
41	21
43	9
45	1
% fmo-4 KO daf2 [121]
#days	dead	censored
0
5
7
9	0
13	6
15	2
17	7
20	12
22	9
24	8
27	7
29	13
31	12
34	16
36	9
38	6
41	8
43	5
45	1

## Sheet: Sheet1
#1	N2								#1	N2					#1	N2
#2	Lei42	fmo-2p::MC; unc-119p::HIF-1(P621A); JT307 #1							#2	Lei42	fmo-2p::MC; unc-119p::HIF-1(P621A); JT307 #1				#11L	Lei51	fmo-2p::MC; JT307; gcy-31; gcy-36 - XA2262 sibling #1
#3	Lei43	fmo-2p::MC; unc-119p::HIF-1(P621A); JT307 #2							#3	Lei43	fmo-2p::MC; unc-119p::HIF-1(P621A); JT307 #2				#12L	Lei52	fmo-2p::MC; JT307; gcy-33; gcy-36 - XA2262 sibling #1
#4	Lei44	fmo-2p::MC; TU3311; CB5602 #1							#4	Lei44	fmo-2p::MC; TU3311; CB5602 #1				#13	Lei53	fmo-2p::MC; JT307; gcy-33; gcy-36 - XA2262 sibling #2
#5	Lei45	fmo-2p::MC; TU3311 #1							#5	Lei45	fmo-2p::MC; TU3311 #1				#14L	Lei55	fmo-2p::MC; JT307 - XA2262 sibling #1
#6	Lei46	fmo-2p::MC; CB5602 #1							#6	Lei46	fmo-2p::MC; CB5602 #1				#15L	Lei56	fmo-2p::MC; JT307 - XA2262 sibling #2
#7	Lei47	fmo-2p::MC; TU3311; CB5602 #2							#7	Lei47	fmo-2p::MC; TU3311; CB5602 #2				#16	Lei57	fmo-2p::MC - XA2262 sibling #1
#8L	Lei48	fmo-2p::MC; JT307; XA2262 #1													#17	Lei58	fmo-2p::MC - XA2262 sibling #2
#9	Lei49	fmo-2p::MC; JT307; XA2262 #2													#18	Lei59	fmo-2p::MC; gcy-33; gcy-36 - XA2262 sibling #1
#10L	Lei50	fmo-2p::MC; JT307; XA2262 #3							#1	N2					#19	Lei60	fmo-2p::MC; gcy-33; gcy-36 - XA2262 sibling #2
#11L	Lei51	fmo-2p::MC; JT307; gcy-31; gcy-36 - XA2262 sibling #1							#8L	Lei48	fmo-2p::MC; JT307; XA2262 #1
#12L	Lei52	fmo-2p::MC; JT307; gcy-33; gcy-36 - XA2262 sibling #1							#9	Lei49	fmo-2p::MC; JT307; XA2262 #2
#13	Lei53	fmo-2p::MC; JT307; gcy-33; gcy-36 - XA2262 sibling #2							#10L	Lei50	fmo-2p::MC; JT307; XA2262 #3
#14L	Lei55	fmo-2p::MC; JT307 - XA2262 sibling #1							#14L	Lei55	fmo-2p::MC; JT307 - XA2262 sibling #1
#15L	Lei56	fmo-2p::MC; JT307 - XA2262 sibling #2							#15L	Lei56	fmo-2p::MC; JT307 - XA2262 sibling #2
#16	Lei57	fmo-2p::MC - XA2262 sibling #1							#16	Lei57	fmo-2p::MC - XA2262 sibling #1
#17	Lei58	fmo-2p::MC - XA2262 sibling #2							#17	Lei58	fmo-2p::MC - XA2262 sibling #2
#18	Lei59	fmo-2p::MC; gcy-33; gcy-36 - XA2262 sibling #1							#20	Lei61	fmo-2p::MC; XA2262 #1
#19	Lei60	fmo-2p::MC; gcy-33; gcy-36 - XA2262 sibling #2							#21	Lei62	fmo-2p::MC; XA2262 #2
#20	Lei61	fmo-2p::MC; XA2262 #1
#21	Lei62	fmo-2p::MC; XA2262 #2
