# Supplementary material for: fmo-4 promotes longevity and stress resistance via ER to mitochondria calcium regulation in C. elegans
Source: eLife journal article supplement (doi:10.7554/elife.99971), 2024-08-27
Supplement: fig6-data2 [file 03.06.2023 FMO4 with fzo drp mix scl5 itr1.xlsx]

## Sheet: lifespan
strain	day	alive	dead-total	dead-normal	dead-ruptured	censored	ratio-alive	percentage-alive
N2 EV	0	124	0				1	100
N2 EV	5	124	0				1	100
N2 EV	7	124	0				1	100						1	2	3	4	5	6	7	8	9	10	11	12	13	14	15
N2 EV	10	124	0	0			1	100			plot data here-->		day	WT; Empty Vector	FMO-4 OE; Empty Vector	FMO-4 KO EV	WT; drp-1 RNAi	FMO-4 OE; drp-1 RNAi	FMO-4 KO; drp-1 RNAi	WT; fzo-1 RNAi	FMO-4 OE; fzo-1 RNAi	FMO-4 KO; fzo-1 RNAi	WT; itr-1 RNAi	FMO-4 OE; itr-1 RNAi	FMO-4 KO; itr-1 RNAi	WT; scl-5 RNAi	FMO-4 OE; scl-5 RNAi	FMO-4 KO; scl-5 RNAi	WT; 50-50 RNAi	FMO-4 OE; 50-50 RNAi	FMO-4 KO; 50-50 RNAi
N2 EV	12	121	3	3			0.975806	97.5806				0	0	100	100	100	100	100	100	100	100	100	100	100	100	100	100	100	100	100	100
N2 EV	14	113	11	8			0.91129	91.129				5	5	100	100	100	100	100	100	100	100	100	100	100	100	100	100	100	100	100	100
N2 EV	17	102	22	11			0.822581	82.2581				7	7	100	100	100	100	100	100	100	100	100	100	100	100	100	100	100	100	100	100
N2 EV	19	87	37	15			0.701613	70.1613				10	10	100	100	100	100	100	100	100	100	100	100	100	100	100	100	100	100	100	100
N2 EV	21	72	52	15			0.580645	58.0645				12	12	97.5806	100	96.3636	97.5	96.4286	92.4731	100	99.1228	96.3415	97.3913	93.8596	90.8333	99.1667	96.5812	93.2692	94.3089	95.7265	92.1053
N2 EV	24	47	77	25			0.379032	37.9032				14	14	91.129	98.0952	90	91.6667	90.1786	82.7957	97.3684	97.3684	90.2439	90.4348	87.7193	80.8333	96.6667	94.0171	86.5385	87.8049	88.0342	80.7018
N2 EV	26	23	101	24			0.185484	18.5484				17	17	82.2581	91.4286	80	83.3333	81.25	69.8925	89.4737	87.7193	80.4878	79.1304	75.4386	69.1667	91.6667	88.8889	74.0385	80.4878	77.7778	70.1754
N2 EV	28	11	113	12			0.0887097	8.87097				19	19	70.1613	83.8095	64.5455	70	66.0714	49.4624	81.5789	78.9474	69.5122	38.2609	29.8246	22.5	85	81.1966	45.1923	75.6098	71.7949	53.5088
N2 EV	31	0	124	11			0	0				21	21	58.0645	73.3333	50	59.1667	52.6786	34.4086	75.4386	71.9298	59.7561	20.8696	10.5263	6.66667	74.1667	70.9402	25.9615	64.2276	57.265	38.5965
N2 EV	33	0	124				0	0				24	24	37.9032	58.0952	27.2727	39.1667	33.0357	11.828	60.5263	55.2632	50	4.34783	3.50877	1.66667	58.3333	53.8462	10.5769	52.0325	47.0085	20.1754
N2 EV	35	0	124				0	0				26	26	18.5484	40.9524	10	22.5	12.5	4.30108	45.614	39.4737	36.5854	0	0	0	41.6667	38.4615	2.88462	39.0244	30.7692	9.64912
N2 EV	38	0	124				0	0				28	28	8.87097	29.5238	5.45455	12.5	8.03571	2.15054	35.9649	30.7018	25.6098				34.1667	28.2051	1.92308	22.7642	18.8034	7.01754
N2 EV	40	0	124				0	0				31	31	0	15.2381	0	0.833333	1.78571	0	24.5614	15.7895	9.7561				15.8333	14.5299	0	12.1951	8.54701	2.63158
N2 EV	42	0	124				0	0				33	33		5.71429		0	0		15.7895	7.01754	2.43902				5	5.98291		1.62602	2.5641	0.877193
N2 EV	45	0	124				0	0				35	35		0					3.50877	0	0				0	0		0	0	0
												38	38							0
4OE EV	0	105	0				1	100				40	40
4OE EV	5	105	0				1	100				42	42
4OE EV	7	105	0				1	100				45	45
4OE EV	10	105	0	0			1	100
4OE EV	12	105	0	0			1	100
4OE EV	14	103	2	2			0.980952	98.0952
4OE EV	17	96	9	7			0.914286	91.4286
4OE EV	19	88	17	8			0.838095	83.8095
4OE EV	21	77	28	11			0.733333	73.3333
4OE EV	24	61	44	16			0.580952	58.0952
4OE EV	26	43	62	18			0.409524	40.9524
4OE EV	28	31	74	12			0.295238	29.5238
4OE EV	31	16	89	15			0.152381	15.2381
4OE EV	33	6	99	10			0.0571429	5.71429
4OE EV	35	0	105	6			0	0
4OE EV	38	0	105				0	0
4OE EV	40	0	105				0	0
4OE EV	42	0	105				0	0
4OE EV	45	0	105				0	0
4KO EV	0	110	0				1	100
4KO EV	5	110	0				1	100
4KO EV	7	110	0				1	100
4KO EV	10	110	0	0			1	100
4KO EV	12	106	4	4			0.963636	96.3636
4KO EV	14	99	11	7			0.9	90
4KO EV	17	88	22	11			0.8	80
4KO EV	19	71	39	17			0.645455	64.5455
4KO EV	21	55	55	16			0.5	50
4KO EV	24	30	80	25			0.272727	27.2727
4KO EV	26	11	99	19			0.1	10
4KO EV	28	6	104	5			0.0545455	5.45455
4KO EV	31	0	110	6			0	0
4KO EV	33	0	110				0	0
4KO EV	35	0	110				0	0
4KO EV	38	0	110				0	0
4KO EV	40	0	110				0	0
4KO EV	42	0	110				0	0
4KO EV	45	0	110				0	0
WT drp1	0	120	0				1	100
WT drp1	5	120	0				1	100
WT drp1	7	120	0				1	100
WT drp1	10	120	0	0			1	100
WT drp1	12	117	3	3			0.975	97.5
WT drp1	14	110	10	7			0.916667	91.6667
WT drp1	17	100	20	10			0.833333	83.3333
WT drp1	19	84	36	16			0.7	70
WT drp1	21	71	49	13			0.591667	59.1667
WT drp1	24	47	73	24			0.391667	39.1667
WT drp1	26	27	93	20			0.225	22.5
WT drp1	28	15	105	12			0.125	12.5
WT drp1	31	1	119	14			0.00833333	0.833333
WT drp1	33	0	120	1			0	0
WT drp1	35	0	120				0	0
WT drp1	38	0	120				0	0
WT drp1	40	0	120				0	0
WT drp1	42	0	120				0	0
WT drp1	45	0	120				0	0
4OE DRP1	0	112	0				1	100
4OE DRP1	5	112	0				1	100
4OE DRP1	7	112	0				1	100
4OE DRP1	10	112	0	0			1	100
4OE DRP1	12	108	4	4			0.964286	96.4286
4OE DRP1	14	101	11	7			0.901786	90.1786
4OE DRP1	17	91	21	10			0.8125	81.25
4OE DRP1	19	74	38	17			0.660714	66.0714
4OE DRP1	21	59	53	15			0.526786	52.6786
4OE DRP1	24	37	75	22			0.330357	33.0357
4OE DRP1	26	14	98	23			0.125	12.5
4OE DRP1	28	9	103	5			0.0803571	8.03571
4OE DRP1	31	2	110	7			0.0178571	1.78571
4OE DRP1	33	0	112	2			0	0
4OE DRP1	35	0	112				0	0
4OE DRP1	38	0	112				0	0
4OE DRP1	40	0	112				0	0
4OE DRP1	42	0	112				0	0
4OE DRP1	45	0	112				0	0
4KO DRP1	0	93	0				1	100
4KO DRP1	5	93	0				1	100
4KO DRP1	7	93	0				1	100
4KO DRP1	10	93	0	0			1	100
4KO DRP1	12	86	7	7			0.924731	92.4731
4KO DRP1	14	77	16	9			0.827957	82.7957
4KO DRP1	17	65	28	12			0.698925	69.8925
4KO DRP1	19	46	47	19			0.494624	49.4624
4KO DRP1	21	32	61	14			0.344086	34.4086
4KO DRP1	24	11	82	21			0.11828	11.828
4KO DRP1	26	4	89	7			0.0430108	4.30108
4KO DRP1	28	2	91	2			0.0215054	2.15054
4KO DRP1	31	0	93	2			0	0
4KO DRP1	33	0	93				0	0
4KO DRP1	35	0	93				0	0
4KO DRP1	38	0	93				0	0
4KO DRP1	40	0	93				0	0
4KO DRP1	42	0	93				0	0
4KO DRP1	45	0	93				0	0
WT fzo1	0	114	0				1	100
WT fzo1	5	114	0				1	100
WT fzo1	7	114	0				1	100
WT fzo1	10	114	0	0			1	100
WT fzo1	12	114	0	0			1	100
WT fzo1	14	111	3	3			0.973684	97.3684
WT fzo1	17	102	12	9			0.894737	89.4737
WT fzo1	19	93	21	9			0.815789	81.5789
WT fzo1	21	86	28	7			0.754386	75.4386
WT fzo1	24	69	45	17			0.605263	60.5263
WT fzo1	26	52	62	17			0.45614	45.614
WT fzo1	28	41	73	11			0.359649	35.9649
WT fzo1	31	28	86	13			0.245614	24.5614
WT fzo1	33	18	96	10			0.157895	15.7895
WT fzo1	35	4	110	14			0.0350877	3.50877
WT fzo1	38	0	114	4			0	0
WT fzo1	40	0	114				0	0
WT fzo1	42	0	114				0	0
WT fzo1	45	0	114				0	0
4OE FZO1	0	114	0				1	100
4OE FZO1	5	114	0				1	100
4OE FZO1	7	114	0				1	100
4OE FZO1	10	114	0	0			1	100
4OE FZO1	12	113	1	1			0.991228	99.1228
4OE FZO1	14	111	3	2			0.973684	97.3684
4OE FZO1	17	100	14	11			0.877193	87.7193
4OE FZO1	19	90	24	10			0.789474	78.9474
4OE FZO1	21	82	32	8			0.719298	71.9298
4OE FZO1	24	63	51	19			0.552632	55.2632
4OE FZO1	26	45	69	18			0.394737	39.4737
4OE FZO1	28	35	79	10			0.307018	30.7018
4OE FZO1	31	18	96	17			0.157895	15.7895
4OE FZO1	33	8	106	10			0.0701754	7.01754
4OE FZO1	35	0	114	8			0	0
4OE FZO1	38	0	114				0	0
4OE FZO1	40	0	114				0	0
4OE FZO1	42	0	114				0	0
4OE FZO1	45
4KO fzo-1	0	82	0				1	100
4KO fzo-1	5	82	0				1	100
4KO fzo-1	7	82	0				1	100
4KO fzo-1	10	82	0	0			1	100
4KO fzo-1	12	79	3	3			0.963415	96.3415
4KO fzo-1	14	74	8	5			0.902439	90.2439
4KO fzo-1	17	66	16	8			0.804878	80.4878
4KO fzo-1	19	57	25	9			0.695122	69.5122
4KO fzo-1	21	49	33	8			0.597561	59.7561
4KO fzo-1	24	41	41	8			0.5	50
4KO fzo-1	26	30	52	11			0.365854	36.5854
4KO fzo-1	28	21	61	9			0.256098	25.6098
4KO fzo-1	31	8	74	13			0.097561	9.7561
4KO fzo-1	33	2	80	6			0.0243902	2.43902
4KO fzo-1	35	0	82	2			0	0
4KO fzo-1	38	0	82				0	0
4KO fzo-1	40	0	82				0	0
4KO fzo-1	42	0	82				0	0
4KO fzo-1	45	0	82				0	0
4KO fzo-1	47	0	82				0	0
WT itr1	0	115	0				1	100
WT itr1	5	115	0				1	100
WT itr1	7	115	0				1	100
WT itr1	10	115	0	0			1	100
WT itr1	12	112	3	3			0.973913	97.3913
WT itr1	14	104	11	8			0.904348	90.4348
WT itr1	17	91	24	13			0.791304	79.1304
WT itr1	19	44	71	47			0.382609	38.2609
WT itr1	21	24	91	20			0.208696	20.8696
WT itr1	24	5	110	19			0.0434783	4.34783
WT itr1	26	0	115	5			0	0
WT itr1	28	0	115				0	0
WT itr1	31	0	115				0	0
WT itr1	33	0	115				0	0
WT itr1	35	0	115				0	0
WT itr1	38	0	115				0	0
WT itr1	40	0	115				0	0
WT itr1	42	0	115				0	0
	45
4OE itr1	0	114	0				1	100
4OE itr1	5	114	0				1	100
4OE itr1	7	114	0				1	100
4OE itr1	10	114	0	0			1	100
4OE itr1	12	107	7	7			0.938596	93.8596
4OE itr1	14	100	14	7			0.877193	87.7193
4OE itr1	17	86	28	14			0.754386	75.4386
4OE itr1	19	34	80	52			0.298246	29.8246
4OE itr1	21	12	102	22			0.105263	10.5263
4OE itr1	24	4	110	8			0.0350877	3.50877
4OE itr1	26	0	114	4			0	0
4OE itr1	28	0	114				0	0
4OE itr1	31	0	114				0	0
4OE itr1	33	0	114				0	0
4OE itr1	35	0	114				0	0
4OE itr1	38	0	114				0	0
4OE itr1	40	0	114				0	0
4OE itr1	42	0	114				0	0
4OE itr1	45
4KO itr1	0	120	0				1	100
4KO itr1	5	120	0				1	100
4KO itr1	7	120	0				1	100
4KO itr1	10	120	0	0			1	100
4KO itr1	12	109	11	11			0.908333	90.8333
4KO itr1	14	97	23	12			0.808333	80.8333
4KO itr1	17	83	37	14			0.691667	69.1667
4KO itr1	19	27	93	56			0.225	22.5
4KO itr1	21	8	112	19			0.0666667	6.66667
4KO itr1	24	2	118	6			0.0166667	1.66667
4KO itr1	26	0	120	2			0	0
4KO itr1	28	0	120				0	0
4KO itr1	31	0	120				0	0
4KO itr1	33	0	120				0	0
4KO itr1	35	0	120				0	0
4KO itr1	38	0	120				0	0
4KO itr1	40	0	120				0	0
4KO itr1	42	0	120				0	0
4KO itr1	45
WT scl5	0	120	0				1	100
WT scl5	5	120	0				1	100
WT scl5	7	120	0				1	100
WT scl5	10	120	0	0			1	100
WT scl5	12	119	1	1			0.991667	99.1667
WT scl5	14	116	4	3			0.966667	96.6667
WT scl5	17	110	10	6			0.916667	91.6667
WT scl5	19	102	18	8			0.85	85
WT scl5	21	89	31	13			0.741667	74.1667
WT scl5	24	70	50	19			0.583333	58.3333
WT scl5	26	50	70	20			0.416667	41.6667
WT scl5	28	41	79	9			0.341667	34.1667
WT scl5	31	19	101	22			0.158333	15.8333
WT scl5	33	6	114	13			0.05	5
WT scl5	35	0	120	6			0	0
WT scl5	38	0	120				0	0
WT scl5	40	0	120				0	0
WT scl5	42	0	120				0	0
WT scl5	45	0	120				0	0
4OE scl5	0	117	0				1	100
4OE scl5	5	117	0				1	100
4OE scl5	7	117	0				1	100
4OE scl5	10	117	0	0			1	100
4OE scl5	12	113	4	4			0.965812	96.5812
4OE scl5	14	110	7	3			0.940171	94.0171
4OE scl5	17	104	13	6			0.888889	88.8889
4OE scl5	19	95	22	9			0.811966	81.1966
4OE scl5	21	83	34	12			0.709402	70.9402
4OE scl5	24	63	54	20			0.538462	53.8462
4OE scl5	26	45	72	18			0.384615	38.4615
4OE scl5	28	33	84	12			0.282051	28.2051
4OE scl5	31	17	100	16			0.145299	14.5299
4OE scl5	33	7	110	10			0.0598291	5.98291
4OE scl5	35	0	117	7			0	0
4OE scl5	38	0	117				0	0
4OE scl5	40	0	117				0	0
4OE scl5	42	0	117				0	0
4OE scl5	45
4KO scl5	0	104	0				1	100
4KO scl5	5	104	0				1	100
4KO scl5	7	104	0				1	100
4KO scl5	10	104	0	0			1	100
4KO scl5	12	97	7	7			0.932692	93.2692
4KO scl5	14	90	14	7			0.865385	86.5385
4KO scl5	17	77	27	13			0.740385	74.0385
4KO scl5	19	47	57	30			0.451923	45.1923
4KO scl5	21	27	77	20			0.259615	25.9615
4KO scl5	24	11	93	16			0.105769	10.5769
4KO scl5	26	3	101	8			0.0288462	2.88462
4KO scl5	28	2	102	1			0.0192308	1.92308
4KO scl5	31	0	104	2			0	0
4KO scl5	33	0	104				0	0
4KO scl5	35	0	104				0	0
4KO scl5	38	0	104				0	0
4KO scl5	40	0	104				0	0
4KO scl5	42	0	104				0	0
4KO scl5	45
WT 50-50	0	123	0			0	1	100
WT 50-50	5	123	0			0	1	100
WT 50-50	7	123	0			0	1	100
WT 50-50	10	123	0	0		0	1	100
WT 50-50	12	116	7	7		0	0.943089	94.3089
WT 50-50	14	108	15	8		0	0.878049	87.8049
WT 50-50	17	99	24	9		0	0.804878	80.4878
WT 50-50	19	93	30	6		0	0.756098	75.6098
WT 50-50	21	79	44	14		0	0.642276	64.2276
WT 50-50	24	64	59	15		0	0.520325	52.0325
WT 50-50	26	48	75	16		0	0.390244	39.0244
WT 50-50	28	28	95	20		0	0.227642	22.7642
WT 50-50	31	15	108	13		0	0.121951	12.1951
WT 50-50	33	2	121	13		0	0.0162602	1.62602
WT 50-50	35	0	123	2		0	0	0
WT 50-50	38	0	123			0	0	0
WT 50-50	40	0	123			0	0	0
WT 50-50	42	0	123			0	0	0
WT 50-50	45	123	0			0	1	100
4OE 50-50	0	117	0			0	1	100
4OE 50-50	5	117	0			0	1	100
4OE 50-50	7	117	0			0	1	100
4OE 50-50	10	117	0	0		0	1	100
4OE 50-50	12	112	5	5		0	0.957265	95.7265
4OE 50-50	14	103	14	9		0	0.880342	88.0342
4OE 50-50	17	91	26	12		0	0.777778	77.7778
4OE 50-50	19	84	33	7		0	0.717949	71.7949
4OE 50-50	21	67	50	17		0	0.57265	57.265
4OE 50-50	24	55	62	12		0	0.470085	47.0085
4OE 50-50	26	36	81	19		0	0.307692	30.7692
4OE 50-50	28	22	95	14		0	0.188034	18.8034
4OE 50-50	31	10	107	12		0	0.0854701	8.54701
4OE 50-50	33	3	114	7		0	0.025641	2.5641
4OE 50-50	35	0	117	3		0	0	0
4OE 50-50	38	0	117			0	0	0
4OE 50-50	40	0	117			0	0	0
4OE 50-50	42	117	0			0	1	100
4OE 50-50	45	117	0			0	1	100
		117
4KO 5050	0	114	0				1	100
4KO 5050	5	114	0				1	100
4KO 5050	7	114	0				1	100
4KO 5050	10	114	0	0			1	100
4KO 5050	12	105	9	9			0.921053	92.1053
4KO 5050	14	92	22	13			0.807018	80.7018
4KO 5050	17	80	34	12			0.701754	70.1754
4KO 5050	19	61	53	19			0.535088	53.5088
4KO 5050	21	44	70	17			0.385965	38.5965
4KO 5050	24	23	91	21			0.201754	20.1754
4KO 5050	26	11	103	12			0.0964912	9.64912
4KO 5050	28	8	106	3			0.0701754	7.01754
4KO 5050	31	3	111	5			0.0263158	2.63158
4KO 5050	33	1	113	2			0.00877193	0.877193
4KO 5050	35	0	114	1			0	0
4KO 5050	38	0	114				0	0
4KO 5050	40	0	114				0	0
4KO 5050	42	0	114				0	0
4KO 5050	45	0	114				0	0
							0

## Sheet: stats itr1
% WT EV [124]
#days	dead	censored
0
5
7
10	0
12	3
14	8
17	11
19	15
21	15
24	25
26	24
28	12
31	11
33
35
38
40
42
45
% fmo-4 OE EV [105]
#days	dead	censored
0
5
7
10	0
12	0
14	2
17	7
19	8
21	11
24	16
26	18
28	12
31	15
33	10
35	6
38
40
42
45
% fmo-4 KO EV [110]
#days	dead	censored
0
5
7
10	0
12	4
14	7
17	11
19	17
21	16
24	25
26	19
28	5
31	6
33
35
38
40
42
45
% WT itr1 [115]
#days	dead	censored
0
5
7
10	0
12	3
14	8
17	13
19	47
21	20
24	19
26	5
28
31
33
35
38
40
42
45
% fmo-4 OE itr1 [114]
#days	dead	censored
0
5
7
10	0
12	7
14	7
17	14
19	52
21	22
24	8
26	4
28
31
33
35
38
40
42
45
% fmo-4 ko itr1 [120]
#days	dead	censored
0
5
7
10	0
12	11
14	12
17	14
19	56
21	19
24	6
26	2
28
31
33
35
38
40
42
45

## Sheet: analysis
% WT EV [119]					condition	chi	pvalue	corrected_pvalue
#days	dead	censored			WT EV v.s. fmo-4 OE EV	23.47	1.3e-06	6.3e-06
0					WT EV v.s. fmo-4 KO EV	3.14	0.0765	0.3824
5					WT EV v.s. WT itr1	44.75	0	0
7					WT EV v.s. fmo-4 OE itr1	58.52	0	0
9	0				WT EV v.s. fmo-4 ko itr1	74.79	0	0
13	1				fmo-4 OE EV v.s. WT EV	23.47	1.3e-06	6.3e-06
15	4				fmo-4 OE EV v.s. fmo-4 KO EV	35.65	2.4e-09	1.2e-08
17	7				fmo-4 OE EV v.s. WT itr1	93.18	0	0
20	13				fmo-4 OE EV v.s. fmo-4 OE itr1	107.43	0	0
22	12				fmo-4 OE EV v.s. fmo-4 ko itr1	123.12	0	0
24	31				fmo-4 KO EV v.s. WT EV	3.14	0.0765	0.3824
27	34				fmo-4 KO EV v.s. fmo-4 OE EV	35.65	2.4e-09	1.2e-08
29	9				fmo-4 KO EV v.s. WT itr1	25.15	5.3e-07	2.7e-06
31	8				fmo-4 KO EV v.s. fmo-4 OE itr1	37.38	0	0
34					fmo-4 KO EV v.s. fmo-4 ko itr1	51.88	0	0
36					WT itr1 v.s. WT EV	44.75	0	0
38					WT itr1 v.s. fmo-4 OE EV	93.18	0	0
41					WT itr1 v.s. fmo-4 KO EV	25.15	5.3e-07	2.7e-06
43					WT itr1 v.s. fmo-4 OE itr1	2.81	0.0936	0.468
45					WT itr1 v.s. fmo-4 ko itr1	10.66	0.0011	0.0055
					fmo-4 OE itr1 v.s. WT EV	58.52	0	0
% WT atf6 [105]					fmo-4 OE itr1 v.s. fmo-4 OE EV	107.43	0	0
#days	dead	censored			fmo-4 OE itr1 v.s. fmo-4 KO EV	37.38	0	0
0					fmo-4 OE itr1 v.s. WT itr1	2.81	0.0936	0.468
5					fmo-4 OE itr1 v.s. fmo-4 ko itr1	2.57	0.1087	0.5437
7					fmo-4 ko itr1 v.s. WT EV	74.79	0	0
9	0				fmo-4 ko itr1 v.s. fmo-4 OE EV	123.12	0	0
13	0				fmo-4 ko itr1 v.s. fmo-4 KO EV	51.88	0	0
15	0				fmo-4 ko itr1 v.s. WT itr1	10.66	0.0011	0.0055
17	3				fmo-4 ko itr1 v.s. fmo-4 OE itr1	2.57	0.1087	0.5437
20	7
22	8
24	18
27	17
29	21
31	13
34	15
36	2
38	1
41
43
45
% C9 atf6 [114]
#days	dead	censored
0
5
7
9	0
13	2
15	1
17	4
20	6
22	7
24	14
27	15
29	27
31	15
34	16
36	2
38	5
41
43
45
% fmo2 atf6 [68]
#days	dead	censored
0
5
7
9	0
13	3
15	2
17	3
20	5
22	9
24	16
27	15
29	12
31	2
34	1
36
38
41
43
45
% 4OE atf6 [69]
#days	dead	censored
0
5
7
9	0
13	3
15	1
17	9
20	4
22	6
24	10
27	14
29	9
31	4
34	8
36	0
38	1
41
43
45
% 4KO atf6 [89]
#days	dead	censored
0
5
7
9	0
13	3
15	3
17	7
20	4
22	8
24	20
27	22
29	18
31	4
34
36
38
41
43
45
% fmo-2 OE EV [112]
#days	dead	censored
0
5
7
9	0
13	1
15	1
17	4
20	6
22	6
24	11
27	19
29	25
31	15
34	14
36	6
38	2
41	0
43	2
45
% fmo-4 OE EV [117]
#days	dead	censored
0
5
7
9	0
13	2
15	2
17	4
20	5
22	6
24	13
27	14
29	26
31	19
34	17
36	4
38	5
41
43
45
% fmo-4 KO EV [100]
#days	dead	censored
0
5
7
9	0
13	4
15	7
17	5
20	13
22	10
24	27
27	21
29	11
31	2
34
36
38
41
43
45
% fmo-2 KO EV [86]
#days	dead	censored
0
5
7
9	0
13	3
15	5
17	9
20	8
22	10
24	14
27	15
29	19
31	3
34
36
38
41
43
45

## Sheet: stats atf-4
% WT EV [119]								condition	chi	pvalue	corrected_pvalue
#days	dead	censored						WT EV v.s. WT atf4	12.96	0.0003	0.0029	****
0								WT EV v.s. C9 atf4	42.64	0	0	****
5								WT EV v.s. fmo2 atf4	0.68	0.4106	1	NS
7								WT EV v.s. 4OE atf4	39.94	0	0	****
9	0							WT EV v.s. 4KO atf4	0.12	0.7286	1	NS
13	1							WT EV v.s. fmo-2 OE EV	49.67	0	0	****
15	4							WT EV v.s. fmo-4 OE EV	53.7	0	0	****
17	7							WT EV v.s. fmo-4 KO EV	2.67	0.1022	0.9196
20	13							WT EV v.s. fmo-2 KO EV	0.01	0.9183	1
22	12							WT atf4 v.s. WT EV	12.96	0.0003	0.0029
24	31							WT atf4 v.s. C9 atf4	19.14	1.2e-05	0.0001
27	34							WT atf4 v.s. fmo2 atf4	17.05	3.6e-05	0.0003
29	9							WT atf4 v.s. 4OE atf4	10.92	0.001	0.0086
31	8							WT atf4 v.s. 4KO atf4	9.11	0.0025	0.0228
34								WT atf4 v.s. fmo-2 OE EV	22.68	1.9e-06	1.7e-05
36								WT atf4 v.s. fmo-4 OE EV	27.03	2e-07	1.8e-06
38								WT atf4 v.s. fmo-4 KO EV	25.49	4.4e-07	4e-06
41								WT atf4 v.s. fmo-2 KO EV	10.21	0.0014	0.0126
43								C9 atf4 v.s. WT EV	42.64	0	0
45								C9 atf4 v.s. WT atf4	19.14	1.2e-05	0.0001
								C9 atf4 v.s. fmo2 atf4	40.62	0	0
% WT atf4 [115]								C9 atf4 v.s. 4OE atf4	3.01	0.0826	0.7435
#days	dead	censored						C9 atf4 v.s. 4KO atf4	34.45	4.4e-09	3.9e-08
0								C9 atf4 v.s. fmo-2 OE EV	0.39	0.5315	1
5								C9 atf4 v.s. fmo-4 OE EV	0.64	0.4252	1
7								C9 atf4 v.s. fmo-4 KO EV	53.23	0	0
9	0							C9 atf4 v.s. fmo-2 KO EV	36.3	0	0
13	1							fmo2 atf4 v.s. WT EV	0.68	0.4106	1
15	4							fmo2 atf4 v.s. WT atf4	17.05	3.6e-05	0.0003
17	1							fmo2 atf4 v.s. C9 atf4	40.62	0	0
20	5							fmo2 atf4 v.s. 4OE atf4	40.58	0	0
22	8							fmo2 atf4 v.s. 4KO atf4	0.14	0.7086	1
24	26							fmo2 atf4 v.s. fmo-2 OE EV	46.4	0	0
27	24							fmo2 atf4 v.s. fmo-4 OE EV	49.75	0	0
29	36							fmo2 atf4 v.s. fmo-4 KO EV	0.53	0.4661	1
31	10							fmo2 atf4 v.s. fmo-2 KO EV	0.42	0.5179	1
34								4OE atf4 v.s. WT EV	39.94	0	0
36								4OE atf4 v.s. WT atf4	10.92	0.001	0.0086
38								4OE atf4 v.s. C9 atf4	3.01	0.0826	0.7435
41								4OE atf4 v.s. fmo2 atf4	40.58	0	0
43								4OE atf4 v.s. 4KO atf4	29.87	4.6e-08	4.2e-07
45								4OE atf4 v.s. fmo-2 OE EV	4.87	0.0274	0.2463
								4OE atf4 v.s. fmo-4 OE EV	6.53	0.0106	0.0952
								4OE atf4 v.s. fmo-4 KO EV	53.4	0	0
% C9 atf4 [109]								4OE atf4 v.s. fmo-2 KO EV	31	2.6e-08	2.3e-07
#days	dead	censored						4KO atf4 v.s. WT EV	0.12	0.7286	1
0								4KO atf4 v.s. WT atf4	9.11	0.0025	0.0228
5								4KO atf4 v.s. C9 atf4	34.45	4.4e-09	3.9e-08
7								4KO atf4 v.s. fmo2 atf4	0.14	0.7086	1
9	0							4KO atf4 v.s. 4OE atf4	29.87	4.6e-08	4.2e-07
13	0							4KO atf4 v.s. fmo-2 OE EV	39.7	0	0
15	3							4KO atf4 v.s. fmo-4 OE EV	43.09	0	0
17	5							4KO atf4 v.s. fmo-4 KO EV	1.11	0.2925	1
20	5							4KO atf4 v.s. fmo-2 KO EV	0.01	0.9399	1
22	7							fmo-2 OE EV v.s. WT EV	49.67	0	0
24	14							fmo-2 OE EV v.s. WT atf4	22.68	1.9e-06	1.7e-05
27	12							fmo-2 OE EV v.s. C9 atf4	0.39	0.5315	1
29	25							fmo-2 OE EV v.s. fmo2 atf4	46.4	0	0
31	19							fmo-2 OE EV v.s. 4OE atf4	4.87	0.0274	0.2463
34	10							fmo-2 OE EV v.s. 4KO atf4	39.7	0	0
36	7							fmo-2 OE EV v.s. fmo-4 OE EV	0.01	0.9312	1
38	2							fmo-2 OE EV v.s. fmo-4 KO EV	59.81	0	0
41								fmo-2 OE EV v.s. fmo-2 KO EV	40.57	0	0
43								fmo-4 OE EV v.s. WT EV	53.7	0	0
45								fmo-4 OE EV v.s. WT atf4	27.03	2e-07	1.8e-06
								fmo-4 OE EV v.s. C9 atf4	0.64	0.4252	1
								fmo-4 OE EV v.s. fmo2 atf4	49.75	0	0
								fmo-4 OE EV v.s. 4OE atf4	6.53	0.0106	0.0952
% fmo2 atf4 [77]								fmo-4 OE EV v.s. 4KO atf4	43.09	0	0
#days	dead	censored						fmo-4 OE EV v.s. fmo-2 OE EV	0.01	0.9312	1
0								fmo-4 OE EV v.s. fmo-4 KO EV	64.02	0	0
5								fmo-4 OE EV v.s. fmo-2 KO EV	44.86	0	0
7								fmo-4 KO EV v.s. WT EV	2.67	0.1022	0.9196
9	0							fmo-4 KO EV v.s. WT atf4	25.49	4.4e-07	4e-06
13	0							fmo-4 KO EV v.s. C9 atf4	53.23	0	0
15	7							fmo-4 KO EV v.s. fmo2 atf4	0.53	0.4661	1
17	2							fmo-4 KO EV v.s. 4OE atf4	53.4	0	0
20	5							fmo-4 KO EV v.s. 4KO atf4	1.11	0.2925	1
22	10							fmo-4 KO EV v.s. fmo-2 OE EV	59.81	0	0
24	26							fmo-4 KO EV v.s. fmo-4 OE EV	64.02	0	0
27	16							fmo-4 KO EV v.s. fmo-2 KO EV	1.89	0.1691	1
29	9							fmo-2 KO EV v.s. WT EV	0.01	0.9183	1
31	2							fmo-2 KO EV v.s. WT atf4	10.21	0.0014	0.0126
34								fmo-2 KO EV v.s. C9 atf4	36.3	0	0
36								fmo-2 KO EV v.s. fmo2 atf4	0.42	0.5179	1	NS
38								fmo-2 KO EV v.s. 4OE atf4	31	2.6e-08	2.3e-07
41								fmo-2 KO EV v.s. 4KO atf4	0.01	0.9399	1
43								fmo-2 KO EV v.s. fmo-2 OE EV	40.57	0	0
45								fmo-2 KO EV v.s. fmo-4 OE EV	44.86	0	0
								fmo-2 KO EV v.s. fmo-4 KO EV	1.89	0.1691	1
% 4OE atf4 [121]
#days	dead	censored
0
5
7
9	0
13	0
15	4
17	1
20	4
22	7
24	14
27	29
29	35
31	15
34	9
36	3
38
41
43
45
% 4KO atf4 [82]
#days	dead	censored
0
5
7
9	0
13	7
15	6
17	5
20	12
22	5
24	15
27	14
29	10
31	8
34
36
38
41
43
45
% fmo-2 OE EV [112]
#days	dead	censored
0
5
7
9	0
13	1
15	1
17	4
20	6
22	6
24	11
27	19
29	25
31	15
34	14
36	6
38	2
41	0
43	2
45
% fmo-4 OE EV [117]
#days	dead	censored
0
5
7
9	0
13	2
15	2
17	4
20	5
22	6
24	13
27	14
29	26
31	19
34	17
36	4
38	5
41
43
45
% fmo-4 KO EV [100]
#days	dead	censored
0
5
7
9	0
13	4
15	7
17	5
20	13
22	10
24	27
27	21
29	11
31	2
34
36
38
41
43
45
% fmo-2 KO EV [86]
#days	dead	censored
0
5
7
9	0
13	3
15	5
17	9
20	8
22	10
24	14
27	15
29	19
31	3
34
36
38
41
43
45

## Sheet: Sheet1
#1	N2								#1	N2					#1	N2
#2	Lei42	fmo-2p::MC; unc-119p::HIF-1(P621A); JT307 #1							#2	Lei42	fmo-2p::MC; unc-119p::HIF-1(P621A); JT307 #1				#11L	Lei51	fmo-2p::MC; JT307; gcy-31; gcy-36 - XA2262 sibling #1
#3	Lei43	fmo-2p::MC; unc-119p::HIF-1(P621A); JT307 #2							#3	Lei43	fmo-2p::MC; unc-119p::HIF-1(P621A); JT307 #2				#12L	Lei52	fmo-2p::MC; JT307; gcy-33; gcy-36 - XA2262 sibling #1
#4	Lei44	fmo-2p::MC; TU3311; CB5602 #1							#4	Lei44	fmo-2p::MC; TU3311; CB5602 #1				#13	Lei53	fmo-2p::MC; JT307; gcy-33; gcy-36 - XA2262 sibling #2
#5	Lei45	fmo-2p::MC; TU3311 #1							#5	Lei45	fmo-2p::MC; TU3311 #1				#14L	Lei55	fmo-2p::MC; JT307 - XA2262 sibling #1
#6	Lei46	fmo-2p::MC; CB5602 #1							#6	Lei46	fmo-2p::MC; CB5602 #1				#15L	Lei56	fmo-2p::MC; JT307 - XA2262 sibling #2
#7	Lei47	fmo-2p::MC; TU3311; CB5602 #2							#7	Lei47	fmo-2p::MC; TU3311; CB5602 #2				#16	Lei57	fmo-2p::MC - XA2262 sibling #1
#8L	Lei48	fmo-2p::MC; JT307; XA2262 #1													#17	Lei58	fmo-2p::MC - XA2262 sibling #2
#9	Lei49	fmo-2p::MC; JT307; XA2262 #2													#18	Lei59	fmo-2p::MC; gcy-33; gcy-36 - XA2262 sibling #1
#10L	Lei50	fmo-2p::MC; JT307; XA2262 #3							#1	N2					#19	Lei60	fmo-2p::MC; gcy-33; gcy-36 - XA2262 sibling #2
#11L	Lei51	fmo-2p::MC; JT307; gcy-31; gcy-36 - XA2262 sibling #1							#8L	Lei48	fmo-2p::MC; JT307; XA2262 #1
#12L	Lei52	fmo-2p::MC; JT307; gcy-33; gcy-36 - XA2262 sibling #1							#9	Lei49	fmo-2p::MC; JT307; XA2262 #2
#13	Lei53	fmo-2p::MC; JT307; gcy-33; gcy-36 - XA2262 sibling #2							#10L	Lei50	fmo-2p::MC; JT307; XA2262 #3
#14L	Lei55	fmo-2p::MC; JT307 - XA2262 sibling #1							#14L	Lei55	fmo-2p::MC; JT307 - XA2262 sibling #1
#15L	Lei56	fmo-2p::MC; JT307 - XA2262 sibling #2							#15L	Lei56	fmo-2p::MC; JT307 - XA2262 sibling #2
#16	Lei57	fmo-2p::MC - XA2262 sibling #1							#16	Lei57	fmo-2p::MC - XA2262 sibling #1
#17	Lei58	fmo-2p::MC - XA2262 sibling #2							#17	Lei58	fmo-2p::MC - XA2262 sibling #2
#18	Lei59	fmo-2p::MC; gcy-33; gcy-36 - XA2262 sibling #1							#20	Lei61	fmo-2p::MC; XA2262 #1
#19	Lei60	fmo-2p::MC; gcy-33; gcy-36 - XA2262 sibling #2							#21	Lei62	fmo-2p::MC; XA2262 #2
#20	Lei61	fmo-2p::MC; XA2262 #1
#21	Lei62	fmo-2p::MC; XA2262 #2
