# Supplementary material for: fmo-4 promotes longevity and stress resistance via ER to mitochondria calcium regulation in C. elegans
Source: eLife journal article supplement (doi:10.7554/elife.99971), 2024-08-27
Supplement: fig6-data4 [file 10.11.2023 rep2 PQ RNAi of atf6 crt1 ire1 mcu1 with FMO4.xlsx]

## Sheet: data
strain	day	alive	dead-total	dead-normal	dead-ruptured	censored	ratio-alive	percentage-alive
N2	0	83	0	0		0	1	100
N2	2	71	12	12		0	0.855422	85.5422
N2	5	50	33	21		0	0.60241	60.241						1	2	3	4	5	6	7	8	9	10	11	12
N2	7	27	56	23		0	0.325301	32.5301			plot data here-->		day	WT; EV	FMO-4 OE; EV	FMO-4 KO; EV	WT; atf-6 RNAi	FMO-4 OE; atf-6 RNAi	FMO-4 KO; atf-6 RNAi	WT; crt-1 RNAi	FMO-4 OE; crt-1 RNAi	FMO-4 KO; crt-1 RNAi	WT; itr-1 RNAi	FMO-4 OE; itr-1 RNAi	FMO-4 KO; itr-1 RNAi	WT; mcu-1 RNAi	FMO-4 OE; mcu-1 RNAi	FMO-4 KO; mcu-1 RNAi
N2	9	10	73	17		0	0.120482	12.0482				0	0	100	100	100	100	100	100	100	100	100	100	100	100	100	100	100
N2	12	0	83	10		0	0	0				2	2	85.5422	95.4545	79.5455	97.7778	95.5056	81.4815	96.5116	96.5517	92.4051	84.5238	85.2273	87.7778	87.7778	89.6552	90.3614
N2	14	0	83			0	0	0				5	5	60.241	84.0909	51.1364	88.8889	89.8876	54.321	87.2093	89.6552	83.5443	55.9524	64.7727	60	68.8889	58.6207	61.4458
N2	16	0	83			0	0	0				7	7	32.5301	63.6364	29.5455	71.1111	73.0337	32.0988	60.4651	68.9655	59.4937	20.2381	34.0909	24.4444	33.3333	28.7356	25.3012
N2	19	0	83			0	0	0				9	9	12.0482	39.7727	11.3636	38.8889	37.0787	13.5802	29.0698	37.931	31.6456	5.95238	13.6364	3.33333	10	6.89655	9.63855
N2	21	0	83			0	0	0				12	12	0	26.1364	0	22.2222	23.5955	0	13.9535	18.3908	17.7215	0	1.13636	0	0	0	0
N2	23	0	83			0	0	0				14	14		17.0455		3.33333	14.6067		4.65116	5.74713	5.06329		0
N2	25	0	83			0	0	0				16	16		9.09091		0	7.86517		0	0	0
N2	27	0	83			0	0	0				19	19		1.13636			4.49438
N2	29	0	83			0	0	0				21	21		0			0
N2	31	0	83			0	0	0				23	23
N2	34	0	83			0	0	0				25	25
N2	36	0	83			0	0	0				27	27
N2	38	0	83			0	0	0				29	29
N2	41	0	83			0	0	0				31	31
												34	34
4OE	0	88	0	0		0	1	100				36	36
4OE	2	84	4	4		0	0.954545	95.4545				38	38
4OE	5	74	14	10		0	0.840909	84.0909				41	41
4OE	7	56	32	18		0	0.636364	63.6364
4OE	9	35	53	21		0	0.397727	39.7727
4OE	12	23	65	12		0	0.261364	26.1364
4OE	14	15	73	8		0	0.170455	17.0455
4OE	16	8	80	7		0	0.0909091	9.09091
4OE	19	1	87	7		0	0.0113636	1.13636
4OE	21	0	88	1		0	0	0
4OE	23	0	88			0	0	0
4OE	25	0	88			0	0	0
4OE	27	0	88			0	0	0
4OE	29	0	88			0	0	0
4OE	31	0	88			0	0	0
4OE	34	0	88			0	0	0
4OE	36	0	88			0	0	0
4OE	38	0	88			0	0	0
4OE	41	0	88			0	0	0
4KO	0	88	0	0		0	1	100
4KO	2	70	18	18		0	0.795455	79.5455
4KO	5	45	43	25		0	0.511364	51.1364
4KO	7	26	62	19		0	0.295455	29.5455
4KO	9	10	78	16		0	0.113636	11.3636
4KO	12	0	88	10		0	0	0
4KO	14	0	88			0	0	0
4KO	16	0	88			0	0	0
4KO	19	0	88			0	0	0
4KO	21	0	88			0	0	0
4KO	23	0	88			0	0	0
4KO	25	0	88			0	0	0
4KO	27	0	88			0	0	0
4KO	29	0	88			0	0	0
4KO	31	0	88			0	0	0
4KO	34	0	88			0	0	0
4KO	36	0	88			0	0	0
4KO	38	0	88			0	0	0
4KO	41	0	88			0	0	0
N2 atf-6	0	90	0	0		0	1	100
N2 atf-6	2	88	2	2		0	0.977778	97.7778
N2 atf-6	5	80	10	8		0	0.888889	88.8889
N2 atf-6	7	64	26	16		0	0.711111	71.1111
N2 atf-6	9	35	55	29		0	0.388889	38.8889
N2 atf-6	12	20	70	15			0.222222	22.2222
N2 atf-6	14	3	87	17		0	0.0333333	3.33333
N2 atf-6	16	0	90	3		0	0	0
N2 atf-6	19	0	90			0	0	0
N2 atf-6	21	0	90			0	0	0
N2 atf-6	23	0	90			0	0	0
N2 atf-6	25	0	90			0	0	0
N2 atf-6	27	0	90			0	0	0
N2 atf-6	29	0	90			0	0	0
N2 atf-6	31	0	90			0	0	0
N2 atf-6	34	0	90			0	0	0
N2 atf-6	36	0	90			0	0	0
N2 atf-6	38	0	90			0	0	0
N2 atf-6	41	0	90			0	0	0
4OE; atf6	0	89	0	0		0	1	100
4OE; atf6	1	85	4	4		0	0.955056	95.5056
4OE; atf6	4	80	9	5		0	0.898876	89.8876
4OE; atf6	6	65	24	15		0	0.730337	73.0337
4OE; atf6	8	33	56	32		0	0.370787	37.0787
4OE; atf6	11	21	68	12		0	0.235955	23.5955
4OE; atf6	13	13	76	8		0	0.146067	14.6067
4OE; atf6	15	7	82	6		0	0.0786517	7.86517
4OE; atf6	18	4	85	3		0	0.0449438	4.49438
4OE; atf6	20	0	89	4		0	0	0
4OE; atf6	22	0	89			0	0	0
4OE; atf6	24	0	89			0	0	0
4OE; atf6	27	0	89			0	0	0
4OE; atf6	29	0	89			0	0	0
4OE; atf6	31	0	89			0	0	0
4OE; atf6	34	0	89			0	0	0
4OE; atf6	36	0	89			0	0	0
4OE; atf6	38	0	89			0	0	0
4OE; atf6	41	0	89			0	0	0
4KO; atf6	0	81	0	0		0	1	100
4KO; atf6	1	66	15	15		0	0.814815	81.4815
4KO; atf6	4	44	37	22		0	0.54321	54.321
4KO; atf6	6	26	55	18		0	0.320988	32.0988
4KO; atf6	8	11	70	15		0	0.135802	13.5802
4KO; atf6	11	0	81	11		0	0	0
4KO; atf6	13	0	81			0	0	0
4KO; atf6	15	0	81			0	0	0
4KO; atf6	18	0	81			0	0	0
4KO; atf6	20	0	81			0	0	0
4KO; atf6	22	0	81			0	0	0
4KO; atf6	24	0	81			0	0	0
4KO; atf6	27	0	81			0	0	0
4KO; atf6	29	0	81			0	0	0
4KO; atf6	31	0	81			0	0	0
4KO; atf6	34	0	81			0	0	0
4KO; atf6	36	0	81			0	0	0
4KO; atf6	38	0	81			0	0	0
4KO; atf6	41	0	81			0	0	0
N2 crt1	0	86	0	0		0	1	100
N2 crt1	5	83	3	3		0	0.965116	96.5116
N2 crt1	7	75	11	8		0	0.872093	87.2093
N2 crt1	10	52	34	23		0	0.604651	60.4651
N2 crt1	13	25	61	27		0	0.290698	29.0698
N2 crt1	16	12	74	13		0	0.139535	13.9535
N2 crt1	17	4	82	8		0	0.0465116	4.65116
N2 crt1	20	0	86	4		0	0	0
N2 crt1	22	0	86			0	0	0
N2 crt1	24	0	86			0	0	0
N2 crt1	27	0	86			0	0	0
N2 crt1	29	0	86			0	0	0
N2 crt1	31	0	86			0	0	0
N2 crt1	34	0	86			0	0	0
N2 crt1	36	0	86			0	0	0
N2 crt1	38	0	86			0	0	0
N2 crt1	41	0	86			0	0	0
N2 crt1	44	0	86			0	0	0
N2 crt1	46	0	86			0	0	0
4OE crt1	0	90	0	0		0	1	100
4OE crt1	5	87	3	3		0	0.966667	96.6667
4OE crt1	7	78	12	9		0	0.866667	86.6667
4OE crt1	10	60	30	18		0	0.666667	66.6667
4OE crt1	13	33	57	27		0	0.366667	36.6667
4OE crt1	16	16	74	17		0	0.177778	17.7778
4OE crt1	17	5	85	11		0	0.0555556	5.55556
4OE crt1	20	0	90	5		0	0	0
4OE crt1	22	0	90			0	0	0
4OE crt1	24	0	90			0	0	0
4OE crt1	27	0	90			0	0	0
4OE crt1	29	0	90			0	0	0
4OE crt1	31	0	90			0	0	0
4OE crt1	34	0	90			0	0	0
4OE crt1	36	0	90			0	0	0
4OE crt1	38	0	90			0	0	0
4OE crt1	41	0	90			0	0	0
4OE crt1	44	0	90			0	0	0
	46
4KO crt1	0	79	0	0		0	1	100
4KO crt1	5	73	6	6		0	0.924051	92.4051
4KO crt1	7	66	13	7		0	0.835443	83.5443
4KO crt1	10	47	32	19		0	0.594937	59.4937
4KO crt1	13	25	54	22		0	0.316456	31.6456
4KO crt1	16	14	65	11		0	0.177215	17.7215
4KO crt1	17	4	75	10		0	0.0506329	5.06329
4KO crt1	20	0	79	4		0	0	0
4KO crt1	22	0	79			0	0	0
4KO crt1	24	0	79			0	0	0
4KO crt1	27	0	79			0	0	0
4KO crt1	29	0	79			0	0	0
4KO crt1	31	0	79			0	0	0
4KO crt1	34	0	79			0	0	0
4KO crt1	36	0	79			0	0	0
4KO crt1	38	0	79			0	0	0
4KO crt1	41	0	79			0	0	0
4KO crt1	44	0	79			0	0	0
4KO crt1	46	0	79				0	0
4KO crt1	47	0	79				0	0
			79
N2 itr1	0	84	0	0		0	1	100
N2 itr1	5	71	13	13		0	0.845238	84.5238
N2 itr1	7	47	37	24		0	0.559524	55.9524
N2 itr1	10	17	67	30		0	0.202381	20.2381
N2 itr1	13	5	79	12		0	0.0595238	5.95238
N2 itr1	16	0	84	5		0	0	0
N2 itr1	17	0	84			0	0	0
N2 itr1	20	0	84			0	0	0
N2 itr1	22	0	84			0	0	0
N2 itr1	24	0	84			0	0	0
N2 itr1	27	0	84			0	0	0
N2 itr1	29	0	84			0	0	0
N2 itr1	31	0	84			0	0	0
N2 itr1	34	0	84			0	0	0
N2 itr1	36	0	84			0	0	0
N2 itr1	38	0	84			0	0	0
N2 itr1	41	0	84			0	0	0
N2 itr1	44	0	84			0	0	0
	46	0	84			0	0	0
	48	0	84			0	0	0
4OE itr1	0	88	0	0		0	1	100
4OE itr1	5	75	13	13		0	0.852273	85.2273
4OE itr1	7	57	31	18		0	0.647727	64.7727
4OE itr1	11	30	58	27		0	0.340909	34.0909
4OE itr1	13	12	76	18		0	0.136364	13.6364
4OE itr1	16	1	87	11		0	0.0113636	1.13636
4OE itr1	18	0	88	1		0	0	0
4OE itr1	20	0	88			0	0	0
4OE itr1	23	0	88			0	0	0
4OE itr1	25	0	88			0	0	0
4OE itr1	27	0	88			0	0	0
4OE itr1	30	0	88			0	0	0
4OE itr1	32	0	88			0	0	0
4OE itr1	34	0	88			0	0	0
4OE itr1	37	0	88			0	0	0
4OE itr1	39	0	88			0	0	0
4OE itr1	41	0	88			0	0	0
4OE itr1	44	0	88			0	0	0
	46
4KO itr1	0	90	0	0		0	1	100
4KO itr1	5	79	11	11		0	0.877778	87.7778
4KO itr1	7	54	36	25		0	0.6	60
4KO itr1	11	22	68	32		0	0.244444	24.4444
4KO itr1	13	3	87	19		0	0.0333333	3.33333
4KO itr1	16	0	90	3		0	0	0
4KO itr1	18	0	90			0	0	0
4KO itr1	20	0	90			0	0	0
4KO itr1	23	0	90			0	0	0
4KO itr1	25	0	90			0	0	0
4KO itr1	27	0	90			0	0	0
4KO itr1	30	0	90			0	0	0
4KO itr1	32	0	90			0	0	0
4KO itr1	34	0	90			0	0	0
4KO itr1	37	0	90			0	0	0
4KO itr1	39	0	90			0	0	0
4KO itr1	41	0	90			0	0	0
4KO itr1	44	0	90			0	0	0
	46
N2 mcu1	0	90	0	0		0	1	100
N2 mcu1	5	79	11	11		0	0.877778	87.7778
N2 mcu1	7	62	28	17		0	0.688889	68.8889
N2 mcu1	11	30	60	32		0	0.333333	33.3333
N2 mcu1	14	9	81	21		0	0.1	10
N2 mcu1	16	0	90	9		0	0	0
N2 mcu1	18	0	90			0	0	0
N2 mcu1	21	0	90			0	0	0
N2 mcu1	23	0	90			0	0	0
N2 mcu1	25	0	90			0	0	0
N2 mcu1	28	0	90			0	0	0
N2 mcu1	30	0	90			0	0	0
N2 mcu1	32	0	90			0	0	0
N2 mcu1	35	0	90			0	0	0
N2 mcu1	37	0	90			0	0	0
N2 mcu1	39	0	90			0	0	0
N2 mcu1	42	0	90			0	0	0
N2 mcu1	44	0	90			0	0	0
N2 mcu1	45	0	90				0	0
4OE mcu1	0	87	0	0		0	1	100
4OE mcu1	5	78	9	9		0	0.896552	89.6552
4OE mcu1	7	51	36	27		0	0.586207	58.6207
4OE mcu1	11	25	62	26		0	0.287356	28.7356
4OE mcu1	14	6	81	19		0	0.0689655	6.89655
4OE mcu1	16	0	87	6		0	0	0
4OE mcu1	18	0	87			0	0	0
4OE mcu1	21	0	87			0	0	0
4OE mcu1	23	0	87			0	0	0
4OE mcu1	25	0	87			0	0	0
4OE mcu1	28	0	87			0	0	0
4OE mcu1	30	0	87			0	0	0
4OE mcu1	32	0	87			0	0	0
4OE mcu1	35	0	87			0	0	0
4OE mcu1	37	0	87			0	0	0
4OE mcu1	39	0	87			0	0	0
4OE mcu1	42	0	87			0	0	0
4OE mcu1	44	0	87			0	0	0
4KO mcu1	0	83	0	0		0	1	100
4KO mcu1	5	75	8	8		0	0.903614	90.3614
4KO mcu1	7	51	32	24		0	0.614458	61.4458
4KO mcu1	10	21	62	30		0	0.253012	25.3012
4KO mcu1	12	8	75	13		0	0.0963855	9.63855
4KO mcu1	14	0	83	8		0	0	0
4KO mcu1	17	0	83			0	0	0
4KO mcu1	19	0	83			0	0	0
4KO mcu1	21	0	83			0	0	0
4KO mcu1	24	0	83			0	0	0
4KO mcu1	26	0	83			0	0	0
4KO mcu1	29	0	83			0	0	0
4KO mcu1	31	0	83			0	0	0
4KO mcu1	33	0	83			0	0	0
4KO mcu1	35	0	83			0	0	0
4KO mcu1	38	0	83			0	0	0
4KO mcu1	40	0	83			0	0	0
4KO mcu1		0	83			0	0	0
16	0	156	0			0	1	100
16	5	156	0			0	1	100
16	7	156	0			0	1	100
16	10	156	0			0	1	100
16	12	156	0			0	1	100
16	14	156	0			0	1	100
16	17	156	0			0	1	100
16	19	156	0			0	1	100
16	21	156	0			0	1	100
16	24	156	0			0	1	100
16	26	156	0			0	1	100
16	29	156	0			0	1	100
16	31	156	0			0	1	100
16	33	156	0			0	1	100
16	35	156	0			0	1	100
16	38	156	0			0	1	100
16	40	156	0			0	1	100
16	42	156	0			0	1	100
17	0	134	0			0	1	100
17	5	134	0			0	1	100
17	7	134	0			0	1	100
17	10	134	0			0	1	100
17	12	134	0			0	1	100
17	14	134	0			0	1	100
17	17	134	0			0	1	100
17	19	134	0			0	1	100
17	21	134	0			0	1	100
17	24	134	0			0	1	100
17	26	134	0			0	1	100
17	29	134	0			0	1	100
17	31	134	0			0	1	100
17	33	134	0			0	1	100
17	35	134	0			0	1	100
17	38	134	0			0	1	100
17	40	134	0			0	1	100
17		134	0			0	1	100
18	0	233	0			0	1	100
18	5	233	0			0	1	100
18	7	233	0			0	1	100
18	10	233	0			0	1	100
18	12	233	0			0	1	100
18	14	233	0			0	1	100
18	17	233	0			0	1	100
18	19	233	0			0	1	100
18	21	233	0			0	1	100
18	24	233	0			0	1	100
18	26	233	0			0	1	100
18	29	233	0			0	1	100
18	31	233	0			0	1	100
18	33	233	0			0	1	100
18	35	233	0			0	1	100
18	38	233	0			0	1	100
18	40	233	0			0	1	100
18	42	233	0			0	1	100
18	45	233	0			0	1	100
19	0	142	0			0	1	100
19	5	142	0			0	1	100
19	7	142	0			0	1	100
19	10	142	0			0	1	100
19	12	142	0			0	1	100
19	14	142	0			0	1	100
19	17	142	0			0	1	100
19	19	142	0			0	1	100
19	21	142	0			0	1	100
19	24	142	0			0	1	100
19	26	142	0			0	1	100
19	29	142	0			0	1	100
19	31	142	0			0	1	100
19	33	142	0			0	1	100
19	35	142	0			0	1	100
19	38	142	0			0	1	100
19	40	142	0			0	1	100
19		142	0			0	1	100
20	0	227	0			0	1	100
20	5	227	0			0	1	100
20	7	227	0			0	1	100
20	10	227	0			0	1	100
20	12	227	0			0	1	100
20	14	227	0			0	1	100
20	17	227	0			0	1	100
20	19	227	0			0	1	100
20	21	227	0			0	1	100
20	24	227	0			0	1	100
20	26	227	0			0	1	100
20	29	227	0			0	1	100
20	31	227	0			0	1	100
20	33	227	0			0	1	100
20	35	227	0			0	1	100
20	38	227	0			0	1	100
20	40	227	0			0	1	100
20		227	0			0	1	100
21	0	154	0			0	1	100
21	5	154	0			0	1	100
21	7	154	0			0	1	100
21	10	154	0			0	1	100
21	12	154	0			0	1	100
21	14	154	0			0	1	100
21	17	154	0			0	1	100
21	19	154	0			0	1	100
21	21	154	0			0	1	100
21	24	154	0			0	1	100
21	26	154	0			0	1	100
21	29	154	0			0	1	100
21	31	154	0			0	1	100
21	33	154	0			0	1	100
21	35	154	0			0	1	100
21	38	154	0			0	1	100
21	40	154	0			0	1	100
21		154	0			0	1	100

## Sheet: atf6 stats
% WT EV [83]					condition	chi	pvalue	corrected_pvalue
#days	dead	censored			WT EV v.s. fmo-4 OE EV	32.2	1.4e-08	7e-08
0	0				WT EV v.s. fmo4KO EV RNAi	0.37	0.5452	1
1	12				WT EV v.s. WT atf6 RNAi	37.88	0	0
5	21				WT EV v.s. fmo4OE atf6 RNAi	38.71	0	0
7	23				WT EV v.s. fmo4KO atf6 RNAi	0.05	0.8218	1
9	17				fmo-4 OE EV v.s. WT EV	32.2	1.4e-08	7e-08
12	10				fmo-4 OE EV v.s. fmo4KO EV RNAi	37.76	0	0
14					fmo-4 OE EV v.s. WT atf6 RNAi	1.63	0.2018	1
16					fmo-4 OE EV v.s. fmo4OE atf6 RNAi	0.16	0.6852	1
19					fmo-4 OE EV v.s. fmo4KO atf6 RNAi	32.9	9.7e-09	4.9e-08
21					fmo4KO EV RNAi v.s. WT EV	0.37	0.5452	1
23					fmo4KO EV RNAi v.s. fmo-4 OE EV	37.76	0	0
25					fmo4KO EV RNAi v.s. WT atf6 RNAi	44.15	0	0
27					fmo4KO EV RNAi v.s. fmo4OE atf6 RNAi	44.3	0	0
					fmo4KO EV RNAi v.s. fmo4KO atf6 RNAi	0.1	0.7575	1
% fmo-4 OE EV [88]					WT atf6 RNAi v.s. WT EV	37.88	0	0
#days	dead	censored			WT atf6 RNAi v.s. fmo-4 OE EV	1.63	0.2018	1
0	0				WT atf6 RNAi v.s. fmo4KO EV RNAi	44.15	0	0
1	4				WT atf6 RNAi v.s. fmo4OE atf6 RNAi	1.78	0.1817	0.9086
5	10				WT atf6 RNAi v.s. fmo4KO atf6 RNAi	38.03	0	0
7	18				fmo4OE atf6 RNAi v.s. WT EV	38.71	0	0
9	21				fmo4OE atf6 RNAi v.s. fmo-4 OE EV	0.16	0.6852	1
12	12				fmo4OE atf6 RNAi v.s. fmo4KO EV RNAi	44.3	0	0
14	8				fmo4OE atf6 RNAi v.s. WT atf6 RNAi	1.78	0.1817	0.9086
16	7				fmo4OE atf6 RNAi v.s. fmo4KO atf6 RNAi	38.71	0	0
19	7				fmo4KO atf6 RNAi v.s. WT EV	0.05	0.8218	1
21	1				fmo4KO atf6 RNAi v.s. fmo-4 OE EV	32.9	9.7e-09	4.9e-08
23					fmo4KO atf6 RNAi v.s. fmo4KO EV RNAi	0.1	0.7575	1
25					fmo4KO atf6 RNAi v.s. WT atf6 RNAi	38.03	0	0
27					fmo4KO atf6 RNAi v.s. fmo4OE atf6 RNAi	38.71	0	0
% fmo4KO EV RNAi [88]
#days	dead	censored
0	0
2	18
5	25
7	19
9	16
12	10
14
16
19
21
23
25
27
% WT atf6 RNAi [90]
#days	dead	censored
0	0
1	2
5	8
7	16
9	29
12	15
14	17
16	3
19
21
23
25
27
% fmo4OE atf6 RNAi [89]
#days	dead	censored
0	0
1	4
5	5
7	15
9	32
12	12
14	8
16	6
19	3
21	4
23
25
27
% fmo4KO atf6 RNAi [81]
#days	dead	censored
0	0
1	15
5	22
7	18
9	15
12	11
14
16
19
21
23
25
27

## Sheet: crt1 stats
% WT EV [83]							condition	chi	pvalue	corrected_pvalue
#days	dead	censored					WT EV v.s. fmo-4 OE EV	32.2	1.4e-08	7e-08
0	0						WT EV v.s. fmo4KO EV RNAi	0.37	0.5452	1
1	12						WT EV v.s. WT crt1 RNAi	22.05	2.7e-06	1.3e-05
5	21						WT EV v.s. fmo4OE crt1 RNAi	30.61	3.2e-08	1.6e-07
7	23						WT EV v.s. fmo4KO crt1 RNAi	20.88	4.9e-06	2.4e-05
9	17						fmo-4 OE EV v.s. WT EV	32.2	1.4e-08	7e-08
12	10						fmo-4 OE EV v.s. fmo4KO EV RNAi	37.76	0	0
14							fmo-4 OE EV v.s. WT crt1 RNAi	5.13	0.0235	0.1177
16							fmo-4 OE EV v.s. fmo4OE crt1 RNAi	2.7	0.1002	0.5008
19							fmo-4 OE EV v.s. fmo4KO crt1 RNAi	4.35	0.0371	0.1856
21							fmo4KO EV RNAi v.s. WT EV	0.37	0.5452	1
23							fmo4KO EV RNAi v.s. fmo-4 OE EV	37.76	0	0
25							fmo4KO EV RNAi v.s. WT crt1 RNAi	27.36	1.7e-07	8.4e-07
27							fmo4KO EV RNAi v.s. fmo4OE crt1 RNAi	36.39	0	0
							fmo4KO EV RNAi v.s. fmo4KO crt1 RNAi	25.04	5.6e-07	2.8e-06
% fmo-4 OE EV [88]							WT crt1 RNAi v.s. WT EV	22.05	2.7e-06	1.3e-05
#days	dead	censored					WT crt1 RNAi v.s. fmo-4 OE EV	5.13	0.0235	0.1177
0	0						WT crt1 RNAi v.s. fmo4KO EV RNAi	27.36	1.7e-07	8.4e-07
1	4						WT crt1 RNAi v.s. fmo4OE crt1 RNAi	0.82	0.3658	1
5	10						WT crt1 RNAi v.s. fmo4KO crt1 RNAi	0.04	0.8467	1
7	18						fmo4OE crt1 RNAi v.s. WT EV	30.61	3.2e-08	1.6e-07
9	21						fmo4OE crt1 RNAi v.s. fmo-4 OE EV	2.7	0.1002	0.5008
12	12						fmo4OE crt1 RNAi v.s. fmo4KO EV RNAi	36.39	0	0
14	8						fmo4OE crt1 RNAi v.s. WT crt1 RNAi	0.82	0.3658	1
16	7						fmo4OE crt1 RNAi v.s. fmo4KO crt1 RNAi	0.4	0.5251	1
19	7						fmo4KO crt1 RNAi v.s. WT EV	20.88	4.9e-06	2.4e-05
21	1						fmo4KO crt1 RNAi v.s. fmo-4 OE EV	4.35	0.0371	0.1856
23							fmo4KO crt1 RNAi v.s. fmo4KO EV RNAi	25.04	5.6e-07	2.8e-06
25							fmo4KO crt1 RNAi v.s. WT crt1 RNAi	0.04	0.8467	1
27							fmo4KO crt1 RNAi v.s. fmo4OE crt1 RNAi	0.4	0.5251	1
% fmo4KO EV RNAi [88]
#days	dead	censored
0	0
2	18
5	25
7	19
9	16
12	10
14
16
19
21
23
25
27
% WT crt1 RNAi [86]
#days	dead	censored
0	0
1	3
5	8
7	23
9	27
12	13
14	8
16	4
19
21
23
25
27
% fmo4OE crt1 RNAi [90]
#days	dead	censored
0	0
1	3
5	9
7	18
9	27
12	17
14	11
16	5
19
21
23
25
27
% fmo4KO crt1 RNAi [79]
#days	dead	censored
0	0
1	6
5	7
7	19
9	22
12	11
14	10
16	4
19
21
23
25
27

## Sheet: mcu1 stats
% WT EV [83]						condition	chi	pvalue	corrected_pvalue
#days	dead	censored				WT EV v.s. fmo-4 OE EV	32.2	1.4e-08	7e-08
0	0					WT EV v.s. fmo4KO EV RNAi	0.37	0.5452	1
1	12					WT EV v.s. WT mcu1 RNAi	0.09	0.7629	1
5	21					WT EV v.s. fmo4OE mcu1 RNAi	0.43	0.5119	1
7	23					WT EV v.s. fmo4KO mcu1 RNAi	0.19	0.6664	1
9	17					fmo-4 OE EV v.s. WT EV	32.2	1.4e-08	7e-08
12	10					fmo-4 OE EV v.s. fmo4KO EV RNAi	37.76	0	0
14						fmo-4 OE EV v.s. WT mcu1 RNAi	32.01	1.5e-08	7.7e-08
16						fmo-4 OE EV v.s. fmo4OE mcu1 RNAi	38.91	0	0
19						fmo-4 OE EV v.s. fmo4KO mcu1 RNAi	36.78	0	0
21						fmo4KO EV RNAi v.s. WT EV	0.37	0.5452	1
23						fmo4KO EV RNAi v.s. fmo-4 OE EV	37.76	0	0
25						fmo4KO EV RNAi v.s. WT mcu1 RNAi	0.93	0.3348	1
27						fmo4KO EV RNAi v.s. fmo4OE mcu1 RNAi	0.01	0.9341	1
						fmo4KO EV RNAi v.s. fmo4KO mcu1 RNAi	0.1	0.7542	1
% fmo-4 OE EV [88]						WT mcu1 RNAi v.s. WT EV	0.09	0.7629	1
#days	dead	censored				WT mcu1 RNAi v.s. fmo-4 OE EV	32.01	1.5e-08	7.7e-08
0	0					WT mcu1 RNAi v.s. fmo4KO EV RNAi	0.93	0.3348	1
1	4					WT mcu1 RNAi v.s. fmo4OE mcu1 RNAi	1.1	0.2937	1
5	10					WT mcu1 RNAi v.s. fmo4KO mcu1 RNAi	0.72	0.3973	1
7	18					fmo4OE mcu1 RNAi v.s. WT EV	0.43	0.5119	1
9	21					fmo4OE mcu1 RNAi v.s. fmo-4 OE EV	38.91	0	0
12	12					fmo4OE mcu1 RNAi v.s. fmo4KO EV RNAi	0.01	0.9341	1
14	8					fmo4OE mcu1 RNAi v.s. WT mcu1 RNAi	1.1	0.2937	1
16	7					fmo4OE mcu1 RNAi v.s. fmo4KO mcu1 RNAi	0.04	0.8437	1
19	7					fmo4KO mcu1 RNAi v.s. WT EV	0.19	0.6664	1
21	1					fmo4KO mcu1 RNAi v.s. fmo-4 OE EV	36.78	0	0
23						fmo4KO mcu1 RNAi v.s. fmo4KO EV RNAi	0.1	0.7542	1
25						fmo4KO mcu1 RNAi v.s. WT mcu1 RNAi	0.72	0.3973	1
27						fmo4KO mcu1 RNAi v.s. fmo4OE mcu1 RNAi	0.04	0.8437	1
% fmo4KO EV RNAi [88]
#days	dead	censored
0	0
2	18
5	25
7	19
9	16
12	10
14
16
19
21
23
25
27
% WT mcu1 RNAi [90]
#days	dead	censored
0	0
1	11
5	17
7	32
9	21
12	9
14
16
19
21
23
25
27
% fmo4OE mcu1 RNAi [87]
#days	dead	censored
0	0
1	9
5	27
7	26
9	19
12	6
14
16
19
21
23
25
27
% fmo4KO mcu1 RNAi [83]
#days	dead	censored
0	0
1	8
5	24
7	30
9	13
12	8
14
16
19
21
23
25
27

## Sheet: itr1 stats
% WT EV [83]						condition	chi	pvalue	corrected_pvalue
#days	dead	censored				WT EV v.s. fmo-4 OE EV	32.2	1.4e-08	7e-08
0	0					WT EV v.s. fmo4KO EV RNAi	0.37	0.5452	1
1	12					WT EV v.s. WT itr1 RNAi	2.3	0.1294	0.6469
5	21					WT EV v.s. fmo4OE itr1 RNAi	0.25	0.6146	1
7	23					WT EV v.s. fmo4KO itr1 RNAi	1.69	0.1939	0.9695
9	17					fmo-4 OE EV v.s. WT EV	32.2	1.4e-08	7e-08
12	10					fmo-4 OE EV v.s. fmo4KO EV RNAi	37.76	0	0
14						fmo-4 OE EV v.s. WT itr1 RNAi	46.03	0	0
16						fmo-4 OE EV v.s. fmo4OE itr1 RNAi	29.6	5.3e-08	2.7e-07
19						fmo-4 OE EV v.s. fmo4KO itr1 RNAi	45.16	0	0
21						fmo4KO EV RNAi v.s. WT EV	0.37	0.5452	1
23						fmo4KO EV RNAi v.s. fmo-4 OE EV	37.76	0	0
25						fmo4KO EV RNAi v.s. WT itr1 RNAi	0.63	0.4258	1
27						fmo4KO EV RNAi v.s. fmo4OE itr1 RNAi	1.19	0.276	1
						fmo4KO EV RNAi v.s. fmo4KO itr1 RNAi	0.28	0.5988	1
% fmo-4 OE EV [88]						WT itr1 RNAi v.s. WT EV	2.3	0.1294	0.6469
#days	dead	censored				WT itr1 RNAi v.s. fmo-4 OE EV	46.03	0	0
0	0					WT itr1 RNAi v.s. fmo4KO EV RNAi	0.63	0.4258	1
1	4					WT itr1 RNAi v.s. fmo4OE itr1 RNAi	4.1	0.0428	0.2141
5	10					WT itr1 RNAi v.s. fmo4KO itr1 RNAi	0.16	0.6861	1
7	18					fmo4OE itr1 RNAi v.s. WT EV	0.25	0.6146	1
9	21					fmo4OE itr1 RNAi v.s. fmo-4 OE EV	29.6	5.3e-08	2.7e-07
12	12					fmo4OE itr1 RNAi v.s. fmo4KO EV RNAi	1.19	0.276	1
14	8					fmo4OE itr1 RNAi v.s. WT itr1 RNAi	4.1	0.0428	0.2141
16	7					fmo4OE itr1 RNAi v.s. fmo4KO itr1 RNAi	3.28	0.07	0.3502
19	7					fmo4KO itr1 RNAi v.s. WT EV	1.69	0.1939	0.9695
21	1					fmo4KO itr1 RNAi v.s. fmo-4 OE EV	45.16	0	0
23						fmo4KO itr1 RNAi v.s. fmo4KO EV RNAi	0.28	0.5988	1
25						fmo4KO itr1 RNAi v.s. WT itr1 RNAi	0.16	0.6861	1
27						fmo4KO itr1 RNAi v.s. fmo4OE itr1 RNAi	3.28	0.07	0.3502
% fmo4KO EV RNAi [88]
#days	dead	censored
0	0
2	18
5	25
7	19
9	16
12	10
14
16
19
21
23
25
27
% WT itr1 RNAi [84]
#days	dead	censored
0	0
1	13
5	24
7	30
9	12
12	5
14
16
19
21
23
25
27
% fmo4OE itr1 RNAi [88]
#days	dead	censored
0	0
1	13
5	18
7	27
9	18
12	11
14	1
16
19
21
23
25
27
% fmo4KO itr1 RNAi [90]
#days	dead	censored
0	0
1	11
5	25
7	32
9	19
12	3
14
16
19
21
23
25
27

## Sheet: Sheet1
#1	N2								#1	N2					#1	N2
#2	Lei42	fmo-2p::MC; unc-119p::HIF-1(P621A); JT307 #1							#2	Lei42	fmo-2p::MC; unc-119p::HIF-1(P621A); JT307 #1				#11L	Lei51	fmo-2p::MC; JT307; gcy-31; gcy-36 - XA2262 sibling #1
#3	Lei43	fmo-2p::MC; unc-119p::HIF-1(P621A); JT307 #2							#3	Lei43	fmo-2p::MC; unc-119p::HIF-1(P621A); JT307 #2				#12L	Lei52	fmo-2p::MC; JT307; gcy-33; gcy-36 - XA2262 sibling #1
#4	Lei44	fmo-2p::MC; TU3311; CB5602 #1							#4	Lei44	fmo-2p::MC; TU3311; CB5602 #1				#13	Lei53	fmo-2p::MC; JT307; gcy-33; gcy-36 - XA2262 sibling #2
#5	Lei45	fmo-2p::MC; TU3311 #1							#5	Lei45	fmo-2p::MC; TU3311 #1				#14L	Lei55	fmo-2p::MC; JT307 - XA2262 sibling #1
#6	Lei46	fmo-2p::MC; CB5602 #1							#6	Lei46	fmo-2p::MC; CB5602 #1				#15L	Lei56	fmo-2p::MC; JT307 - XA2262 sibling #2
#7	Lei47	fmo-2p::MC; TU3311; CB5602 #2							#7	Lei47	fmo-2p::MC; TU3311; CB5602 #2				#16	Lei57	fmo-2p::MC - XA2262 sibling #1
#8L	Lei48	fmo-2p::MC; JT307; XA2262 #1													#17	Lei58	fmo-2p::MC - XA2262 sibling #2
#9	Lei49	fmo-2p::MC; JT307; XA2262 #2													#18	Lei59	fmo-2p::MC; gcy-33; gcy-36 - XA2262 sibling #1
#10L	Lei50	fmo-2p::MC; JT307; XA2262 #3							#1	N2					#19	Lei60	fmo-2p::MC; gcy-33; gcy-36 - XA2262 sibling #2
#11L	Lei51	fmo-2p::MC; JT307; gcy-31; gcy-36 - XA2262 sibling #1							#8L	Lei48	fmo-2p::MC; JT307; XA2262 #1
#12L	Lei52	fmo-2p::MC; JT307; gcy-33; gcy-36 - XA2262 sibling #1							#9	Lei49	fmo-2p::MC; JT307; XA2262 #2
#13	Lei53	fmo-2p::MC; JT307; gcy-33; gcy-36 - XA2262 sibling #2							#10L	Lei50	fmo-2p::MC; JT307; XA2262 #3
#14L	Lei55	fmo-2p::MC; JT307 - XA2262 sibling #1							#14L	Lei55	fmo-2p::MC; JT307 - XA2262 sibling #1
#15L	Lei56	fmo-2p::MC; JT307 - XA2262 sibling #2							#15L	Lei56	fmo-2p::MC; JT307 - XA2262 sibling #2
#16	Lei57	fmo-2p::MC - XA2262 sibling #1							#16	Lei57	fmo-2p::MC - XA2262 sibling #1
#17	Lei58	fmo-2p::MC - XA2262 sibling #2							#17	Lei58	fmo-2p::MC - XA2262 sibling #2
#18	Lei59	fmo-2p::MC; gcy-33; gcy-36 - XA2262 sibling #1							#20	Lei61	fmo-2p::MC; XA2262 #1
#19	Lei60	fmo-2p::MC; gcy-33; gcy-36 - XA2262 sibling #2							#21	Lei62	fmo-2p::MC; XA2262 #2
#20	Lei61	fmo-2p::MC; XA2262 #1
#21	Lei62	fmo-2p::MC; XA2262 #2
