# Supplementary material for: fmo-4 promotes longevity and stress resistance via ER to mitochondria calcium regulation in C. elegans
Source: eLife journal article supplement (doi:10.7554/elife.99971), 2024-08-27
Supplement: fig6-data4 [file 11.8.2023 rep3 PQ RNAi of atf6 crt1 ire1 mcu1 with FMO4.xlsx]

## Sheet: data
strain	day	alive	dead-total	dead-normal	dead-ruptured	censored	ratio-alive	percentage-alive
N2	0	52	0	0		0	1	100
N2	2	45	7	7		0	0.865385	86.5385
N2	5	38	14	7		0	0.730769	73.0769						1	2	3	4	5	6	7	8	9	10	11	12
N2	7	22	30	16		0	0.423077	42.3077			plot data here-->		day	WT; EV	FMO-4 OE; EV	FMO-4 KO; EV	WT; atf-6 RNAi	FMO-4 OE; atf-6 RNAi	FMO-4 KO; atf-6 RNAi	WT; crt-1 RNAi	FMO-4 OE; crt-1 RNAi	FMO-4 KO; crt-1 RNAi	WT; itr-1 RNAi	FMO-4 OE; itr-1 RNAi	FMO-4 KO; itr-1 RNAi	WT; mcu-1 RNAi	FMO-4 OE; mcu-1 RNAi	FMO-4 KO; mcu-1 RNAi
N2	9	10	42	12		0	0.192308	19.2308				0	0	100	100	100	100	100	100	100	100	100	100	100	100	100	100	100
N2	12	0	52	10		0	0	0				1	1	86.5385	100	90.566	100	100	88.4615	100	100	100	88.8889	91.0714	84.7826	90.9091	92.8571	88.6364
N2	14	0	52			0	0	0				5	5	73.0769	90	77.3585	94.7368	94.5946	75	94.5946	92.5	90.9091	77.7778	78.5714	71.7391	79.5455	78.5714	77.2727
N2	16	0	52			0	0	0				7	7	42.3077	67.5	39.6226	73.6842	75.6757	44.2308	72.973	72.5	75	37.7778	41.0714	30.4348	43.1818	42.8571	43.1818
N2	19	0	52			0	0	0				9	9	19.2308	47.5	13.2075	44.7368	54.0541	19.2308	43.2432	45	50	8.88889	16.0714	4.34783	9.09091	9.52381	6.81818
N2	21	0	52			0	0	0				12	12	0	27.5	0	26.3158	40.5405	0	27.027	27.5	29.5455	0	3.57143	0	0	0	0
N2	23	0	52			0	0	0				14	14		15		10.5263	21.6216		8.10811	10	11.3636		0
N2	25	0	52			0	0	0				16	16		2.5		0	8.10811		0	0	0
N2	27	0	52			0	0	0				19	19		0			2.7027
N2	29	0	52			0	0	0				21	21					0
N2	31	0	52			0	0	0				23	23
N2	34	0	52			0	0	0				25	25
N2	36	0	52			0	0	0				27	27
N2	38	0	52			0	0	0				29	29
N2	41	0	52			0	0	0				31	31
												34	34
4OE	0	40	0	0		0	1	100				36	36
4OE	1	40	0	0		0	1	100				38	38
4OE	4	36	4	4		0	0.9	90				41	41
4OE	6	27	13	9		0	0.675	67.5
4OE	8	19	21	8		0	0.475	47.5
4OE	11	11	29	8		0	0.275	27.5
4OE	13	6	34	5		0	0.15	15
4OE	15	1	39	5		0	0.025	2.5
4OE	18	0	40	1		0	0	0
4OE	20	0	40			0	0	0
4OE	22	0	40			0	0	0
4OE	24	0	40			0	0	0
4OE	27	0	40			0	0	0
4OE	29	0	40			0	0	0
4OE	31	0	40			0	0	0
4OE	34	0	40			0	0	0
4OE	36	0	40			0	0	0
4OE	38	0	40			0	0	0
4OE	41	0	40			0	0	0
4KO	0	53	0	0		0	1	100
4KO	1	48	5	5		0	0.90566	90.566
4KO	4	41	12	7		0	0.773585	77.3585
4KO	6	21	32	20		0	0.396226	39.6226
4KO	8	7	46	14		0	0.132075	13.2075
4KO	11	0	53	7		0	0	0
4KO	13	0	53			0	0	0
4KO	15	0	53			0	0	0
4KO	18	0	53			0	0	0
4KO	20	0	53			0	0	0
4KO	22	0	53			0	0	0
4KO	24	0	53			0	0	0
4KO	27	0	53			0	0	0
4KO	29	0	53			0	0	0
4KO	31	0	53			0	0	0
4KO	34	0	53			0	0	0
4KO	36	0	53			0	0	0
4KO	38	0	53			0	0	0
4KO	41	0	53			0	0	0
N2 atf-6	0	38	0	0		0	1	100
N2 atf-6	1	38	0	0		0	1	100
N2 atf-6	4	36	2	2		0	0.947368	94.7368
N2 atf-6	6	28	10	8		0	0.736842	73.6842
N2 atf-6	8	17	21	11		0	0.447368	44.7368
N2 atf-6	11	10	28	7			0.263158	26.3158
N2 atf-6	13	4	34	6		0	0.105263	10.5263
N2 atf-6	15	0	38	4		0	0	0
N2 atf-6	18	0	38			0	0	0
N2 atf-6	20	0	38			0	0	0
N2 atf-6	22	0	38			0	0	0
N2 atf-6	24	0	38			0	0	0
N2 atf-6	27	0	38			0	0	0
N2 atf-6	29	0	38			0	0	0
N2 atf-6	31	0	38			0	0	0
N2 atf-6	34	0	38			0	0	0
N2 atf-6	36	0	38			0	0	0
N2 atf-6	38	0	38			0	0	0
N2 atf-6	41	0	38			0	0	0
4OE; atf6	0	37	0	0		0	1	100
4OE; atf6	1	37	0	0		0	1	100
4OE; atf6	4	35	2	2		0	0.945946	94.5946
4OE; atf6	6	28	9	7		0	0.756757	75.6757
4OE; atf6	8	20	17	8		0	0.540541	54.0541
4OE; atf6	11	15	22	5		0	0.405405	40.5405
4OE; atf6	13	8	29	7		0	0.216216	21.6216
4OE; atf6	15	3	34	5		0	0.0810811	8.10811
4OE; atf6	18	1	36	2		0	0.027027	2.7027
4OE; atf6	20	0	37	1		0	0	0
4OE; atf6	22	0	37			0	0	0
4OE; atf6	24	0	37			0	0	0
4OE; atf6	27	0	37			0	0	0
4OE; atf6	29	0	37			0	0	0
4OE; atf6	31	0	37			0	0	0
4OE; atf6	34	0	37			0	0	0
4OE; atf6	36	0	37			0	0	0
4OE; atf6	38	0	37			0	0	0
4OE; atf6	41	0	37			0	0	0
4KO; atf6	0	52	0	0		0	1	100
4KO; atf6	1	46	6	6		0	0.884615	88.4615
4KO; atf6	4	39	13	7		0	0.75	75
4KO; atf6	6	23	29	16		0	0.442308	44.2308
4KO; atf6	8	10	42	13		0	0.192308	19.2308
4KO; atf6	11	0	52	10		0	0	0
4KO; atf6	13	0	52			0	0	0
4KO; atf6	15	0	52			0	0	0
4KO; atf6	18	0	52			0	0	0
4KO; atf6	20	0	52			0	0	0
4KO; atf6	22	0	52			0	0	0
4KO; atf6	24	0	52			0	0	0
4KO; atf6	27	0	52			0	0	0
4KO; atf6	29	0	52			0	0	0
4KO; atf6	31	0	52			0	0	0
4KO; atf6	34	0	52			0	0	0
4KO; atf6	36	0	52			0	0	0
4KO; atf6	38	0	52			0	0	0
4KO; atf6	41	0	52			0	0	0
N2 crt1	0	37	0	0		0	1	100
N2 crt1	5	37	0	0		0	1	100
N2 crt1	7	35	2	2		0	0.945946	94.5946
N2 crt1	10	27	10	8		0	0.72973	72.973
N2 crt1	13	16	21	11		0	0.432432	43.2432
N2 crt1	16	10	27	6		0	0.27027	27.027
N2 crt1	17	3	34	7		0	0.0810811	8.10811
N2 crt1	20	0	37	3		0	0	0
N2 crt1	22	0	37			0	0	0
N2 crt1	24	0	37			0	0	0
N2 crt1	27	0	37			0	0	0
N2 crt1	29	0	37			0	0	0
N2 crt1	31	0	37			0	0	0
N2 crt1	34	0	37			0	0	0
N2 crt1	36	0	37			0	0	0
N2 crt1	38	0	37			0	0	0
N2 crt1	41	0	37			0	0	0
N2 crt1	44	0	37			0	0	0
N2 crt1	46	0	37			0	0	0
4OE crt1	0	40	0	0		0	1	100
4OE crt1	5	40	0	0		0	1	100
4OE crt1	7	37	3	3		0	0.925	92.5
4OE crt1	10	29	11	8		0	0.725	72.5
4OE crt1	13	18	22	11		0	0.45	45
4OE crt1	16	11	29	7		0	0.275	27.5
4OE crt1	17	4	36	7		0	0.1	10
4OE crt1	20	0	40	4		0	0	0
4OE crt1	22	0	40			0	0	0
4OE crt1	24	0	40			0	0	0
4OE crt1	27	0	40			0	0	0
4OE crt1	29	0	40			0	0	0
4OE crt1	31	0	40			0	0	0
4OE crt1	34	0	40			0	0	0
4OE crt1	36	0	40			0	0	0
4OE crt1	38	0	40			0	0	0
4OE crt1	41	0	40			0	0	0
4OE crt1	44	0	40			0	0	0
	46
4KO crt1	0	44	0	0		0	1	100
4KO crt1	5	44	0	0		0	1	100
4KO crt1	7	40	4	4		0	0.909091	90.9091
4KO crt1	10	33	11	7		0	0.75	75
4KO crt1	13	22	22	11		0	0.5	50
4KO crt1	16	13	31	9		0	0.295455	29.5455
4KO crt1	17	5	39	8		0	0.113636	11.3636
4KO crt1	20	0	44	5		0	0	0
4KO crt1	22	0	44			0	0	0
4KO crt1	24	0	44			0	0	0
4KO crt1	27	0	44			0	0	0
4KO crt1	29	0	44			0	0	0
4KO crt1	31	0	44			0	0	0
4KO crt1	34	0	44			0	0	0
4KO crt1	36	0	44			0	0	0
4KO crt1	38	0	44			0	0	0
4KO crt1	41	0	44			0	0	0
4KO crt1	44	0	44			0	0	0
4KO crt1	46	0	44				0	0
4KO crt1	47	0	44				0	0
			44
N2 itr1	0	45	0	0		0	1	100
N2 itr1	5	40	5	5		0	0.888889	88.8889
N2 itr1	7	35	10	5		0	0.777778	77.7778
N2 itr1	10	17	28	18		0	0.377778	37.7778
N2 itr1	13	4	41	13		0	0.0888889	8.88889
N2 itr1	16	0	45	4		0	0	0
N2 itr1	17	0	45			0	0	0
N2 itr1	20	0	45			0	0	0
N2 itr1	22	0	45			0	0	0
N2 itr1	24	0	45			0	0	0
N2 itr1	27	0	45			0	0	0
N2 itr1	29	0	45			0	0	0
N2 itr1	31	0	45			0	0	0
N2 itr1	34	0	45			0	0	0
N2 itr1	36	0	45			0	0	0
N2 itr1	38	0	45			0	0	0
N2 itr1	41	0	45			0	0	0
N2 itr1	44	0	45			0	0	0
	46	0	45			0	0	0
	48	0	45			0	0	0
4OE itr1	0	56	0	0		0	1	100
4OE itr1	5	51	5	5		0	0.910714	91.0714
4OE itr1	7	44	12	7		0	0.785714	78.5714
4OE itr1	11	23	33	21		0	0.410714	41.0714
4OE itr1	13	9	47	14		0	0.160714	16.0714
4OE itr1	16	2	54	7		0	0.0357143	3.57143
4OE itr1	18	0	56	2		0	0	0
4OE itr1	20	0	56			0	0	0
4OE itr1	23	0	56			0	0	0
4OE itr1	25	0	56			0	0	0
4OE itr1	27	0	56			0	0	0
4OE itr1	30	0	56			0	0	0
4OE itr1	32	0	56			0	0	0
4OE itr1	34	0	56			0	0	0
4OE itr1	37	0	56			0	0	0
4OE itr1	39	0	56			0	0	0
4OE itr1	41	0	56			0	0	0
4OE itr1	44	0	56			0	0	0
	46
4KO itr1	0	46	0	0		0	1	100
4KO itr1	5	39	7	7		0	0.847826	84.7826
4KO itr1	7	33	13	6		0	0.717391	71.7391
4KO itr1	11	14	32	19		0	0.304348	30.4348
4KO itr1	13	2	44	12		0	0.0434783	4.34783
4KO itr1	16	0	46	2		0	0	0
4KO itr1	18	0	46			0	0	0
4KO itr1	20	0	46			0	0	0
4KO itr1	23	0	46			0	0	0
4KO itr1	25	0	46			0	0	0
4KO itr1	27	0	46			0	0	0
4KO itr1	30	0	46			0	0	0
4KO itr1	32	0	46			0	0	0
4KO itr1	34	0	46			0	0	0
4KO itr1	37	0	46			0	0	0
4KO itr1	39	0	46			0	0	0
4KO itr1	41	0	46			0	0	0
4KO itr1	44	0	46			0	0	0
	46
N2 mcu1	0	44	0	0		0	1	100
N2 mcu1	5	40	4	4		0	0.909091	90.9091
N2 mcu1	7	35	9	5		0	0.795455	79.5455
N2 mcu1	11	19	25	16		0	0.431818	43.1818
N2 mcu1	14	4	40	15		0	0.0909091	9.09091
N2 mcu1	16	0	44	4		0	0	0
N2 mcu1	18	0	44			0	0	0
N2 mcu1	21	0	44			0	0	0
N2 mcu1	23	0	44			0	0	0
N2 mcu1	25	0	44			0	0	0
N2 mcu1	28	0	44			0	0	0
N2 mcu1	30	0	44			0	0	0
N2 mcu1	32	0	44			0	0	0
N2 mcu1	35	0	44			0	0	0
N2 mcu1	37	0	44			0	0	0
N2 mcu1	39	0	44			0	0	0
N2 mcu1	42	0	44			0	0	0
N2 mcu1	44	0	44			0	0	0
N2 mcu1	45	0	44				0	0
4OE mcu1	0	42	0	0		0	1	100
4OE mcu1	5	39	3	3		0	0.928571	92.8571
4OE mcu1	7	33	9	6		0	0.785714	78.5714
4OE mcu1	11	18	24	15		0	0.428571	42.8571
4OE mcu1	14	4	38	14		0	0.0952381	9.52381
4OE mcu1	16	0	42	4		0	0	0
4OE mcu1	18	0	42			0	0	0
4OE mcu1	21	0	42			0	0	0
4OE mcu1	23	0	42			0	0	0
4OE mcu1	25	0	42			0	0	0
4OE mcu1	28	0	42			0	0	0
4OE mcu1	30	0	42			0	0	0
4OE mcu1	32	0	42			0	0	0
4OE mcu1	35	0	42			0	0	0
4OE mcu1	37	0	42			0	0	0
4OE mcu1	39	0	42			0	0	0
4OE mcu1	42	0	42			0	0	0
4OE mcu1	44	0	42			0	0	0
4KO mcu1	0	44	0	0		0	1	100
4KO mcu1	5	39	5	5		0	0.886364	88.6364
4KO mcu1	7	34	10	5		0	0.772727	77.2727
4KO mcu1	10	19	25	15		0	0.431818	43.1818
4KO mcu1	12	3	41	16		0	0.0681818	6.81818
4KO mcu1	14	0	44	3		0	0	0
4KO mcu1	17	0	44			0	0	0
4KO mcu1	19	0	44			0	0	0
4KO mcu1	21	0	44			0	0	0
4KO mcu1	24	0	44			0	0	0
4KO mcu1	26	0	44			0	0	0
4KO mcu1	29	0	44			0	0	0
4KO mcu1	31	0	44			0	0	0
4KO mcu1	33	0	44			0	0	0
4KO mcu1	35	0	44			0	0	0
4KO mcu1	38	0	44			0	0	0
4KO mcu1	40	0	44			0	0	0
4KO mcu1		0	44			0	0	0
16	0	156	0			0	1	100
16	5	156	0			0	1	100
16	7	156	0			0	1	100
16	10	156	0			0	1	100
16	12	156	0			0	1	100
16	14	156	0			0	1	100
16	17	156	0			0	1	100
16	19	156	0			0	1	100
16	21	156	0			0	1	100
16	24	156	0			0	1	100
16	26	156	0			0	1	100
16	29	156	0			0	1	100
16	31	156	0			0	1	100
16	33	156	0			0	1	100
16	35	156	0			0	1	100
16	38	156	0			0	1	100
16	40	156	0			0	1	100
16	42	156	0			0	1	100
17	0	134	0			0	1	100
17	5	134	0			0	1	100
17	7	134	0			0	1	100
17	10	134	0			0	1	100
17	12	134	0			0	1	100
17	14	134	0			0	1	100
17	17	134	0			0	1	100
17	19	134	0			0	1	100
17	21	134	0			0	1	100
17	24	134	0			0	1	100
17	26	134	0			0	1	100
17	29	134	0			0	1	100
17	31	134	0			0	1	100
17	33	134	0			0	1	100
17	35	134	0			0	1	100
17	38	134	0			0	1	100
17	40	134	0			0	1	100
17		134	0			0	1	100
18	0	233	0			0	1	100
18	5	233	0			0	1	100
18	7	233	0			0	1	100
18	10	233	0			0	1	100
18	12	233	0			0	1	100
18	14	233	0			0	1	100
18	17	233	0			0	1	100
18	19	233	0			0	1	100
18	21	233	0			0	1	100
18	24	233	0			0	1	100
18	26	233	0			0	1	100
18	29	233	0			0	1	100
18	31	233	0			0	1	100
18	33	233	0			0	1	100
18	35	233	0			0	1	100
18	38	233	0			0	1	100
18	40	233	0			0	1	100
18	42	233	0			0	1	100
18	45	233	0			0	1	100
19	0	142	0			0	1	100
19	5	142	0			0	1	100
19	7	142	0			0	1	100
19	10	142	0			0	1	100
19	12	142	0			0	1	100
19	14	142	0			0	1	100
19	17	142	0			0	1	100
19	19	142	0			0	1	100
19	21	142	0			0	1	100
19	24	142	0			0	1	100
19	26	142	0			0	1	100
19	29	142	0			0	1	100
19	31	142	0			0	1	100
19	33	142	0			0	1	100
19	35	142	0			0	1	100
19	38	142	0			0	1	100
19	40	142	0			0	1	100
19		142	0			0	1	100
20	0	227	0			0	1	100
20	5	227	0			0	1	100
20	7	227	0			0	1	100
20	10	227	0			0	1	100
20	12	227	0			0	1	100
20	14	227	0			0	1	100
20	17	227	0			0	1	100
20	19	227	0			0	1	100
20	21	227	0			0	1	100
20	24	227	0			0	1	100
20	26	227	0			0	1	100
20	29	227	0			0	1	100
20	31	227	0			0	1	100
20	33	227	0			0	1	100
20	35	227	0			0	1	100
20	38	227	0			0	1	100
20	40	227	0			0	1	100
20		227	0			0	1	100
21	0	154	0			0	1	100
21	5	154	0			0	1	100
21	7	154	0			0	1	100
21	10	154	0			0	1	100
21	12	154	0			0	1	100
21	14	154	0			0	1	100
21	17	154	0			0	1	100
21	19	154	0			0	1	100
21	21	154	0			0	1	100
21	24	154	0			0	1	100
21	26	154	0			0	1	100
21	29	154	0			0	1	100
21	31	154	0			0	1	100
21	33	154	0			0	1	100
21	35	154	0			0	1	100
21	38	154	0			0	1	100
21	40	154	0			0	1	100
21		154	0			0	1	100

## Sheet: atf6 stats
% WT EV [52]						condition	chi	pvalue	corrected_pvalue
#days	dead	censored				WT EV v.s. fmo-4 OE EV	15.74	0.0001	0.0004
0	0					WT EV v.s. fmo4KO EV RNAi	0.1	0.7525	1
1	7					WT EV v.s. WT atf6 RNAi	16.62	4.6e-05	0.0002
5	7					WT EV v.s. fmo4OE atf6 RNAi	24.01	9.6e-07	4.8e-06
7	16					WT EV v.s. fmo4KO atf6 RNAi	0.02	0.8781	1
9	12					fmo-4 OE EV v.s. WT EV	15.74	0.0001	0.0004
12	10					fmo-4 OE EV v.s. fmo4KO EV RNAi	18.2	2e-05	0.0001
14						fmo-4 OE EV v.s. WT atf6 RNAi	0.08	0.774	1
16						fmo-4 OE EV v.s. fmo4OE atf6 RNAi	1.63	0.2012	1
19						fmo-4 OE EV v.s. fmo4KO atf6 RNAi	15.11	0.0001	0.0005
21						fmo4KO EV RNAi v.s. WT EV	0.1	0.7525	1
23						fmo4KO EV RNAi v.s. fmo-4 OE EV	18.2	2e-05	0.0001
25						fmo4KO EV RNAi v.s. WT atf6 RNAi	19.68	9.2e-06	4.6e-05
27						fmo4KO EV RNAi v.s. fmo4OE atf6 RNAi	26.83	2.2e-07	1.1e-06
						fmo4KO EV RNAi v.s. fmo4KO atf6 RNAi	0.25	0.6198	1
% fmo-4 OE EV [40]						WT atf6 RNAi v.s. WT EV	16.62	4.6e-05	0.0002
#days	dead	censored				WT atf6 RNAi v.s. fmo-4 OE EV	0.08	0.774	1
0	0					WT atf6 RNAi v.s. fmo4KO EV RNAi	19.68	9.2e-06	4.6e-05
1	0					WT atf6 RNAi v.s. fmo4OE atf6 RNAi	2.34	0.1257	0.6285
5	4					WT atf6 RNAi v.s. fmo4KO atf6 RNAi	16	0.0001	0.0003
7	9					fmo4OE atf6 RNAi v.s. WT EV	24.01	9.6e-07	4.8e-06
9	8					fmo4OE atf6 RNAi v.s. fmo-4 OE EV	1.63	0.2012	1
12	8					fmo4OE atf6 RNAi v.s. fmo4KO EV RNAi	26.83	2.2e-07	1.1e-06
14	5					fmo4OE atf6 RNAi v.s. WT atf6 RNAi	2.34	0.1257	0.6285
16	5					fmo4OE atf6 RNAi v.s. fmo4KO atf6 RNAi	23.39	1.3e-06	6.6e-06
19	1					fmo4KO atf6 RNAi v.s. WT EV	0.02	0.8781	1
21						fmo4KO atf6 RNAi v.s. fmo-4 OE EV	15.11	0.0001	0.0005
23						fmo4KO atf6 RNAi v.s. fmo4KO EV RNAi	0.25	0.6198	1
25						fmo4KO atf6 RNAi v.s. WT atf6 RNAi	16	0.0001	0.0003
27						fmo4KO atf6 RNAi v.s. fmo4OE atf6 RNAi	23.39	1.3e-06	6.6e-06
% fmo4KO EV RNAi [53]
#days	dead	censored
0	0
2	5
5	7
7	20
9	14
12	7
14
16
19
21
23
25
27
% WT atf6 RNAi [38]
#days	dead	censored
0	0
1	0
5	2
7	8
9	11
12	7
14	6
16	4
19
21
23
25
27
% fmo4OE atf6 RNAi [37]
#days	dead	censored
0	0
1	0
5	2
7	7
9	8
12	5
14	7
16	5
19	2
21	1
23
25
27
% fmo4KO atf6 RNAi [52]
#days	dead	censored
0	0
1	6
5	7
7	16
9	13
12	10
14
16
19
21
23
25
27

## Sheet: crt1 stats
% WT EV [52]							condition	chi	pvalue	corrected_pvalue
#days	dead	censored					WT EV v.s. fmo-4 OE EV	15.74	0.0001	0.0004
0	0						WT EV v.s. fmo4KO EV RNAi	0.1	0.7525	1
1	7						WT EV v.s. WT crt1 RNAi	15.97	0.0001	0.0003
5	7						WT EV v.s. fmo4OE crt1 RNAi	16.76	4.3e-05	0.0002
7	16						WT EV v.s. fmo4KO crt1 RNAi	20.21	6.9e-06	3.5e-05
9	12						fmo-4 OE EV v.s. WT EV	15.74	0.0001	0.0004
12	10						fmo-4 OE EV v.s. fmo4KO EV RNAi	18.2	2e-05	0.0001
14							fmo-4 OE EV v.s. WT crt1 RNAi	0.18	0.6681	1
16							fmo-4 OE EV v.s. fmo4OE crt1 RNAi	0.11	0.7413	1
19							fmo-4 OE EV v.s. fmo4KO crt1 RNAi	0	0.9485	1
21							fmo4KO EV RNAi v.s. WT EV	0.1	0.7525	1
23							fmo4KO EV RNAi v.s. fmo-4 OE EV	18.2	2e-05	0.0001
25							fmo4KO EV RNAi v.s. WT crt1 RNAi	18.89	1.4e-05	0.0001
27							fmo4KO EV RNAi v.s. fmo4OE crt1 RNAi	19.63	9.4e-06	4.7e-05
							fmo4KO EV RNAi v.s. fmo4KO crt1 RNAi	23.33	1.4e-06	6.8e-06
% fmo-4 OE EV [40]							WT crt1 RNAi v.s. WT EV	15.97	0.0001	0.0003
#days	dead	censored					WT crt1 RNAi v.s. fmo-4 OE EV	0.18	0.6681	1
0	0						WT crt1 RNAi v.s. fmo4KO EV RNAi	18.89	1.4e-05	0.0001
1	0						WT crt1 RNAi v.s. fmo4OE crt1 RNAi	0.02	0.8973	1
5	4						WT crt1 RNAi v.s. fmo4KO crt1 RNAi	0.2	0.6542	1
7	9						fmo4OE crt1 RNAi v.s. WT EV	16.76	4.3e-05	0.0002
9	8						fmo4OE crt1 RNAi v.s. fmo-4 OE EV	0.11	0.7413	1
12	8						fmo4OE crt1 RNAi v.s. fmo4KO EV RNAi	19.63	9.4e-06	4.7e-05
14	5						fmo4OE crt1 RNAi v.s. WT crt1 RNAi	0.02	0.8973	1
16	5						fmo4OE crt1 RNAi v.s. fmo4KO crt1 RNAi	0.1	0.7538	1
19	1						fmo4KO crt1 RNAi v.s. WT EV	20.21	6.9e-06	3.5e-05
21							fmo4KO crt1 RNAi v.s. fmo-4 OE EV	0	0.9485	1
23							fmo4KO crt1 RNAi v.s. fmo4KO EV RNAi	23.33	1.4e-06	6.8e-06
25							fmo4KO crt1 RNAi v.s. WT crt1 RNAi	0.2	0.6542	1
27							fmo4KO crt1 RNAi v.s. fmo4OE crt1 RNAi	0.1	0.7538	1
% fmo4KO EV RNAi [53]
#days	dead	censored
0	0
2	5
5	7
7	20
9	14
12	7
14
16
19
21
23
25
27
% WT crt1 RNAi [37]
#days	dead	censored
0	0
1	0
5	2
7	8
9	11
12	6
14	7
16	3
19
21
23
25
27
% fmo4OE crt1 RNAi [40]
#days	dead	censored
0	0
1	0
5	3
7	8
9	11
12	7
14	7
16	4
19
21
23
25
27
% fmo4KO crt1 RNAi [44]
#days	dead	censored
0	0
1	0
5	4
7	7
9	11
12	9
14	8
16	5
19
21
23
25
27

## Sheet: mcu1 stats
% WT EV [52]						condition	chi	pvalue	corrected_pvalue
#days	dead	censored				WT EV v.s. fmo-4 OE EV	15.74	0.0001	0.0004
0	0					WT EV v.s. fmo4KO EV RNAi	0.1	0.7525	1
1	7					WT EV v.s. WT mcu1 RNAi	0.18	0.6733	1
5	7					WT EV v.s. fmo4OE mcu1 RNAi	0.16	0.6851	1
7	16					WT EV v.s. fmo4KO mcu1 RNAi	0.45	0.5032	1
9	12					fmo-4 OE EV v.s. WT EV	15.74	0.0001	0.0004
12	10					fmo-4 OE EV v.s. fmo4KO EV RNAi	18.2	2e-05	0.0001
14						fmo-4 OE EV v.s. WT mcu1 RNAi	16.86	4e-05	0.0002
16						fmo-4 OE EV v.s. fmo4OE mcu1 RNAi	16.45	5e-05	0.0002
19						fmo-4 OE EV v.s. fmo4KO mcu1 RNAi	17.93	2.3e-05	0.0001
21						fmo4KO EV RNAi v.s. WT EV	0.1	0.7525	1
23						fmo4KO EV RNAi v.s. fmo-4 OE EV	18.2	2e-05	0.0001
25						fmo4KO EV RNAi v.s. WT mcu1 RNAi	0	0.9468	1
27						fmo4KO EV RNAi v.s. fmo4OE mcu1 RNAi	0	0.9536	1
						fmo4KO EV RNAi v.s. fmo4KO mcu1 RNAi	0.11	0.7425	1
% fmo-4 OE EV [40]						WT mcu1 RNAi v.s. WT EV	0.18	0.6733	1
#days	dead	censored				WT mcu1 RNAi v.s. fmo-4 OE EV	16.86	4e-05	0.0002
0	0					WT mcu1 RNAi v.s. fmo4KO EV RNAi	0	0.9468	1
1	0					WT mcu1 RNAi v.s. fmo4OE mcu1 RNAi	0	0.9997	1
5	4					WT mcu1 RNAi v.s. fmo4KO mcu1 RNAi	0.06	0.8037	1
7	9					fmo4OE mcu1 RNAi v.s. WT EV	0.16	0.6851	1
9	8					fmo4OE mcu1 RNAi v.s. fmo-4 OE EV	16.45	5e-05	0.0002
12	8					fmo4OE mcu1 RNAi v.s. fmo4KO EV RNAi	0	0.9536	1
14	5					fmo4OE mcu1 RNAi v.s. WT mcu1 RNAi	0	0.9997	1
16	5					fmo4OE mcu1 RNAi v.s. fmo4KO mcu1 RNAi	0.06	0.8047	1
19	1					fmo4KO mcu1 RNAi v.s. WT EV	0.45	0.5032	1
21						fmo4KO mcu1 RNAi v.s. fmo-4 OE EV	17.93	2.3e-05	0.0001
23						fmo4KO mcu1 RNAi v.s. fmo4KO EV RNAi	0.11	0.7425	1
25						fmo4KO mcu1 RNAi v.s. WT mcu1 RNAi	0.06	0.8037	1
27						fmo4KO mcu1 RNAi v.s. fmo4OE mcu1 RNAi	0.06	0.8047	1
% fmo4KO EV RNAi [53]
#days	dead	censored
0	0
2	5
5	7
7	20
9	14
12	7
14
16
19
21
23
25
27
% WT mcu1 RNAi [44]
#days	dead	censored
0	0
1	4
5	5
7	16
9	15
12	4
14
16
19
21
23
25
27
% fmo4OE mcu1 RNAi [42]
#days	dead	censored
0	0
1	3
5	6
7	15
9	14
12	4
14
16
19
21
23
25
27
% fmo4KO mcu1 RNAi [44]
#days	dead	censored
0	0
1	5
5	5
7	15
9	16
12	3
14
16
19
21
23
25
27

## Sheet: itr1 stats
% WT EV [52]					condition	chi	pvalue	corrected_pvalue
#days	dead	censored			WT EV v.s. fmo-4 OE EV	15.74	0.0001	0.0004
0	0				WT EV v.s. fmo4KO EV RNAi	0.1	0.7525	1
1	7				WT EV v.s. WT itr1 RNAi	0.55	0.4571	1
5	7				WT EV v.s. fmo4OE itr1 RNAi	0.05	0.8198	1
7	16				WT EV v.s. fmo4KO itr1 RNAi	2.75	0.0975	0.4876
9	12				fmo-4 OE EV v.s. WT EV	15.74	0.0001	0.0004
12	10				fmo-4 OE EV v.s. fmo4KO EV RNAi	18.2	2e-05	0.0001
14					fmo-4 OE EV v.s. WT itr1 RNAi	18.74	1.5e-05	0.0001
16					fmo-4 OE EV v.s. fmo4OE itr1 RNAi	15.45	0.0001	0.0004
19					fmo-4 OE EV v.s. fmo4KO itr1 RNAi	23.97	9.8e-07	4.9e-06
21					fmo4KO EV RNAi v.s. WT EV	0.1	0.7525	1
23					fmo4KO EV RNAi v.s. fmo-4 OE EV	18.2	2e-05	0.0001
25					fmo4KO EV RNAi v.s. WT itr1 RNAi	0.2	0.6572	1
27					fmo4KO EV RNAi v.s. fmo4OE itr1 RNAi	0.28	0.5971	1
					fmo4KO EV RNAi v.s. fmo4KO itr1 RNAi	2.12	0.1455	0.7276
% fmo-4 OE EV [40]					WT itr1 RNAi v.s. WT EV	0.55	0.4571	1
#days	dead	censored			WT itr1 RNAi v.s. fmo-4 OE EV	18.74	1.5e-05	0.0001
0	0				WT itr1 RNAi v.s. fmo4KO EV RNAi	0.2	0.6572	1
1	0				WT itr1 RNAi v.s. fmo4OE itr1 RNAi	0.79	0.3732	1
5	4				WT itr1 RNAi v.s. fmo4KO itr1 RNAi	1.01	0.3158	1
7	9				fmo4OE itr1 RNAi v.s. WT EV	0.05	0.8198	1
9	8				fmo4OE itr1 RNAi v.s. fmo-4 OE EV	15.45	0.0001	0.0004
12	8				fmo4OE itr1 RNAi v.s. fmo4KO EV RNAi	0.28	0.5971	1
14	5				fmo4OE itr1 RNAi v.s. WT itr1 RNAi	0.79	0.3732	1
16	5				fmo4OE itr1 RNAi v.s. fmo4KO itr1 RNAi	3.26	0.0709	0.3546
19	1				fmo4KO itr1 RNAi v.s. WT EV	2.75	0.0975	0.4876
21					fmo4KO itr1 RNAi v.s. fmo-4 OE EV	23.97	9.8e-07	4.9e-06
23					fmo4KO itr1 RNAi v.s. fmo4KO EV RNAi	2.12	0.1455	0.7276
25					fmo4KO itr1 RNAi v.s. WT itr1 RNAi	1.01	0.3158	1
27					fmo4KO itr1 RNAi v.s. fmo4OE itr1 RNAi	3.26	0.0709	0.3546
% fmo4KO EV RNAi [53]
#days	dead	censored
0	0
2	5
5	7
7	20
9	14
12	7
14
16
19
21
23
25
27
% WT itr1 RNAi [45]
#days	dead	censored
0	0
1	5
5	5
7	18
9	13
12	4
14
16
19
21
23
25
27
% fmo4OE itr1 RNAi [56]
#days	dead	censored
0	0
1	5
5	7
7	21
9	14
12	7
14	2
16
19
21
23
25
27
% fmo4KO itr1 RNAi [46]
#days	dead	censored
0	0
1	7
5	6
7	19
9	12
12	2
14
16
19
21
23
25
27

## Sheet: Sheet1
#1	N2								#1	N2					#1	N2
#2	Lei42	fmo-2p::MC; unc-119p::HIF-1(P621A); JT307 #1							#2	Lei42	fmo-2p::MC; unc-119p::HIF-1(P621A); JT307 #1				#11L	Lei51	fmo-2p::MC; JT307; gcy-31; gcy-36 - XA2262 sibling #1
#3	Lei43	fmo-2p::MC; unc-119p::HIF-1(P621A); JT307 #2							#3	Lei43	fmo-2p::MC; unc-119p::HIF-1(P621A); JT307 #2				#12L	Lei52	fmo-2p::MC; JT307; gcy-33; gcy-36 - XA2262 sibling #1
#4	Lei44	fmo-2p::MC; TU3311; CB5602 #1							#4	Lei44	fmo-2p::MC; TU3311; CB5602 #1				#13	Lei53	fmo-2p::MC; JT307; gcy-33; gcy-36 - XA2262 sibling #2
#5	Lei45	fmo-2p::MC; TU3311 #1							#5	Lei45	fmo-2p::MC; TU3311 #1				#14L	Lei55	fmo-2p::MC; JT307 - XA2262 sibling #1
#6	Lei46	fmo-2p::MC; CB5602 #1							#6	Lei46	fmo-2p::MC; CB5602 #1				#15L	Lei56	fmo-2p::MC; JT307 - XA2262 sibling #2
#7	Lei47	fmo-2p::MC; TU3311; CB5602 #2							#7	Lei47	fmo-2p::MC; TU3311; CB5602 #2				#16	Lei57	fmo-2p::MC - XA2262 sibling #1
#8L	Lei48	fmo-2p::MC; JT307; XA2262 #1													#17	Lei58	fmo-2p::MC - XA2262 sibling #2
#9	Lei49	fmo-2p::MC; JT307; XA2262 #2													#18	Lei59	fmo-2p::MC; gcy-33; gcy-36 - XA2262 sibling #1
#10L	Lei50	fmo-2p::MC; JT307; XA2262 #3							#1	N2					#19	Lei60	fmo-2p::MC; gcy-33; gcy-36 - XA2262 sibling #2
#11L	Lei51	fmo-2p::MC; JT307; gcy-31; gcy-36 - XA2262 sibling #1							#8L	Lei48	fmo-2p::MC; JT307; XA2262 #1
#12L	Lei52	fmo-2p::MC; JT307; gcy-33; gcy-36 - XA2262 sibling #1							#9	Lei49	fmo-2p::MC; JT307; XA2262 #2
#13	Lei53	fmo-2p::MC; JT307; gcy-33; gcy-36 - XA2262 sibling #2							#10L	Lei50	fmo-2p::MC; JT307; XA2262 #3
#14L	Lei55	fmo-2p::MC; JT307 - XA2262 sibling #1							#14L	Lei55	fmo-2p::MC; JT307 - XA2262 sibling #1
#15L	Lei56	fmo-2p::MC; JT307 - XA2262 sibling #2							#15L	Lei56	fmo-2p::MC; JT307 - XA2262 sibling #2
#16	Lei57	fmo-2p::MC - XA2262 sibling #1							#16	Lei57	fmo-2p::MC - XA2262 sibling #1
#17	Lei58	fmo-2p::MC - XA2262 sibling #2							#17	Lei58	fmo-2p::MC - XA2262 sibling #2
#18	Lei59	fmo-2p::MC; gcy-33; gcy-36 - XA2262 sibling #1							#20	Lei61	fmo-2p::MC; XA2262 #1
#19	Lei60	fmo-2p::MC; gcy-33; gcy-36 - XA2262 sibling #2							#21	Lei62	fmo-2p::MC; XA2262 #2
#20	Lei61	fmo-2p::MC; XA2262 #1
#21	Lei62	fmo-2p::MC; XA2262 #2
