# Supplementary material for: fmo-4 promotes longevity and stress resistance via ER to mitochondria calcium regulation in C. elegans
Source: eLife journal article supplement (doi:10.7554/elife.99971), 2024-08-27
Supplement: fig7-data1 [file 02mar 2mcherry 4mcherry ev atf6 rsks.xlsx]

## Sheet: Sheet1
	2mcherry EV							2mcherry atf6								2mcherry rsks1
1	56637.6	488.326	314	722			1	57155.3	520.866	333	883				1	52122.8	539.045	332	2645
2	46876.9	491.811	314	762			2	65350.4	577.329	277	1049				2	60220.6	544.737	331	1992
3	74060	526.702	321	1204			3	76284.4	523.114	332	873				3	65406.8	590.809	338	2767
4	51821.6	548.114	351	970			4	68763.9	508.472	319	892				4	41872.7	623.247	381	2530
5	47316.2	542.461	359	858			5	81455	541.076	349	1024				5	41860.1	632.272	393	1250
6	60452.8	610.604	397	1230			6	66774.8	549.181	380	988				6	53986.4	561.962	390	1480
7	56223.5	551.213	230	928			7	48910	678.936	408	1240				7	57556.9	662.965	465	1432
8	58218.9	591.454	365	1141			8	71499.8	599.663	408	1028				8	45116.8	624.397	409	1636
9	48141.3	597.988	403	1068			9	68651	598.863	414	1140				9	46720.1	634.023	454	1474
10	49380.6	592.528	380	880			10	68136.4	602.465	415	1181				10	57851.8	533.854	364	2158
11	67433.6	625.226	406	1299			11	53553.5	586.591	430	1002				11	68450.2	662.09	465	1420
12	66166.1	653.347	453	1286			12	58416.6	582.033	400	1094				12	50431.7	628.487	421	1331
13	60797.9	585.805	438	918			13	62322.7	595.929	397	1162				13	41857	639.267	455	1750
14	58764.8	600.487	440	1326			14	63540	538.311	359	1108				14	57180.4	632.06	420	3464
15	54149.6	580.583	386	1001			15	61833.3	523.647	311	870				15	45022.7	611.692	452	2566
16	66787.3	588.128	401	1001			16	59859.8	590.748	422	991				16	54780.2	623.389	467	2751
17	57688.7	580.215	371	980			17	56904.3	613.311	423	1387				17	95514	538.437	345	763
18	86239.6	462.362	313	660			18	65115.1	657.686	417	1734
							19	59348.4	656.877	451	1570
							20	72820.7	565.236	429	911
	4mcherry EV							4mcherry atf6								4mcherry rsks1
1	66395.1	1059.96	465	3406			1	57704.3	1276.5	523	3469				1	62617.6	1324.33	530	5248
2	60719.5	1327.6	461	3931			2	57092.5	1405.46	560	3520				2	53829.6	1095.38	565	5060
3	53007.6	1184.41	558	4240			3	66561.4	1495.13	695	3520				3	43494.7	1486.17	605	4880
4	64377.7	1473.82	461	4452			4	61685.8	1629.62	549	4292				4	50610.5	1275.08	502	4276
5	66332.4	1287.2	298	4263			5	59985.3	1422.01	419	4561				5	51162.7	1492.67	637	4872
6	75330.7	1218.11	534	4323			6	55966.2	1609.95	628	4097				6	38123.4	1372.32	436	5338
7	61491.3	1210.78	523	3536			7	69328.7	1777.28	601	6634				7	44373.2	1387.6	564	4702
8	57710.6	1353.51	456	5084			8	62209.8	1412.55	661	3223				8	60769.7	1333.26	641	4478
9	68105.1	1310.25	578	5483			9	60117.1	1423.31	747	2976				9	46669.9	1495.29	604	4286
10	71832.4	1495.59	650	4494			10	73288.2	1532.55	866	3599				10	54322.2	1401.49	601	4682
11	73630.1	1390	634	4779			11	66561.4	1492.96	806	3509				11	48285.7	1326.02	713	4440
12	45835.3	1423.97	547	4712			12	58604.8	1607.32	687	3676				12	43761.4	1316.44	454	5338
13	50748.6	1309.67	514	5199			13	71892	1309.03	435	3510				13	52511.8	1383.02	540	4675
14	60590.8	1363.85	668	6386			14	74775.3	1460.68	517	4264				14	63213.7	1386.9	431	4880
15	48921.5	1550.07	556	5116			15	67207.7	1636.42	701	5018				15	51944	1488.59	574	4872
16	63191.8	1506.64	806	4740			16	68324.7	1411.76	686	3625				16	49368.1	1300.92	584	5060
17	64167.5	1343.76	528	5684			17	50114.8	1541.85	597	5998				17	51900	1284.85	385	3646
18	61930.5	1439.23	579	4142			18	58818.2	1417.92	617	4231				18	58168.7	309.336	191	502
19	80504.3	671.573	529	878			19	52235.7	1393.62	589	6022
		1347.14					20	52066.3	339.393	226	549

## Sheet: Sheet2
fmo2mcherry EV	Fluoresence Intentsity	BGC	Mean	Standard Dev		Max	BGC	Mean	Standard Dev				fmo2mcherry atf-6	Fluoresence Intentsity	BGC	Mean	Standard Dev		Max	BGC	Mean	Standard Dev		fmo2mcherry rsks-1	Fluoresence Intentsity	BGC	Mean	Standard Dev		Max	BGC	Mean	Standard Dev		fmo4mcherry EV	Fluoresence Intentsity	BGC	Mean	Standard Dev		Max	BGC	Mean	Standard Dev		fmo4mcherry atf-6	Fluoresence Intentsity	BGC	Mean
1	488.326	25.964	111.461	44.1032			0	0	0				1	520.866	-44.37	16.0849	49.2774			0	0	0		1	539.045	0.608	70.5815	42.1064			0	0	0		1	1059.96	388.39	675.562	139.507			0	0	0		1	1276.5	937.106	1147.76
2	491.811	29.449					0						2	577.329	12.093					0				2	544.737	6.3					0				2	1327.6	656.028	675.562				0				2	1405.46	1066.07
3	526.702	64.34					0						3	523.114	-42.122					0				3	590.809	52.372					0				3	1184.41	512.838					0				3	1495.13	1155.74
4	548.114	85.752					0						4	508.472	-56.764					0				4	623.247	84.81					0				4	1473.82	802.243					0				4	1629.62	1290.23
5	542.461	80.099					0						5	541.076	-24.16					0				5	632.272	93.835					0				5	1287.2	615.632					0				5	1422.01	1082.61
6	610.604	148.242					0						6	549.181	-16.055					0				6	561.962	23.525					0				6	1218.11	546.534					0				6	1609.95	1270.56
7	551.213	88.851					0						7	678.936	113.7					0				7	662.965	124.528					0				7	1210.78	539.204					0				7	1777.28	1437.88
8	591.454	129.092					0						8	599.663	34.427					0				8	624.397	85.96					0				8	1353.51	681.94					0				8	1412.55	1073.16
9	597.988	135.626											9	598.863	33.627					0				9	634.023	95.586					0				9	1310.25	638.674					0				9	1423.31	1083.91
	592.528	130.166											10	602.465	37.229					0				10	533.854	-4.583					0				10	1495.59	824.015					0				10	1532.55	1193.16
	625.226	162.864											11	586.591	21.355					0				11	662.09	123.653					0				11	1390	718.43					0				11	1492.96	1153.57
	653.347	190.985											12	582.033	16.797					0				12	628.487	90.05					0				12	1423.97	752.402					0				12	1607.32	1267.93
	585.805	123.443											13	595.929	30.693					0				13	639.267	100.83					0				13	1309.67	638.099					0				13	1309.03	969.639
	600.487	138.125											14	538.311	-26.925					0				14	632.06	93.623					0				14	1363.85	692.274					0				14	1460.68	1121.29
	580.583	118.221											15	523.647	-41.589					0				15	611.692	73.255					0				15	1550.07	878.497					0					1636.42	1297.03
	588.128	125.766											16	590.748	25.512					0				16	623.389	84.952					0				16	1506.64	835.071					0					1411.76	1072.37
	580.215	117.853											17	613.311	48.075					0				17	538.437						0				17	1343.76	672.191										1541.85	1202.46
	462.362												18	657.686	92.45					0				18												1439.23	767.66										1417.92	1078.52
													20	656.877	91.641																					671.573											1393.62	1054.23
														565.236																								4mcherry EV norm		4mcherry atf6	4mcherry atf6 norm						339.393
																																					388.39	0.574914		937.106	1.38715
																																					656.028	0.971084		1066.07	1.57804
																																					512.838	0.759128		1155.74	1.71078
																																					802.243	1.18752		1290.23	1.90986
																																					615.632	0.911288		1082.61	1.60253
																																					546.534	0.809006		1270.56	1.88075
																																					539.204	0.798156		1437.88	2.12843
																																					681.94	1.00944		1073.16	1.58854
																																					638.674	0.945396		1083.91	1.60446
																																					824.015	1.21975		1193.16	1.76617
													mcherry induction	0.14431					gfp Induction	#DIV/0!				gfp Induction	0.633239					gfp Induction	#DIV/0!						718.43	1.06345		1153.57	1.70757					mcherry induction	1.69897
																																					752.402	1.11374		1267.93	1.87685
																																					638.099	0.944545		969.639	1.43531
																																					692.274	1.02474		1121.29	1.65979
																																					878.497	1.30039		1297.03	1.91992
																																					835.071	1.23611		1072.37	1.58737
																																					672.191	0.99501		1202.46	1.77994
																																					767.66	1.13633		1078.52	1.59648
																																								1054.23	1.56052
[truncated: 14 more columns]
