# Supplementary material for: fmo-4 promotes longevity and stress resistance via ER to mitochondria calcium regulation in C. elegans
Source: eLife journal article supplement (doi:10.7554/elife.99971), 2024-08-27
Supplement: fig7-data1 [file 23feb2023 mcherry ev atf6 rsks1.xlsx]

## Sheet: Sheet1
	2mcherry EV						2mcherry atf-6						2mcherry rsks-1
1	52160.3	291.331	174	570		1	40152.2	239.483	132	554		1	28893.9	295.453	171	676
2	56003.7	300.075	169	728		2	39755.3	257.109	149	626		2	44048.7	297.821	156	1970
3	51457.3	298.667	183	702		3	49020	261.334	154	1081		3	35880.7	294.46	172	970
4	52619.7	321.894	185	692		4	52600.9	258.518	154	542		4	40308.4	320.172	186	1499
5	55488.1	317.683	185	937		5	63952.9	299.447	180	772		5	45420.4	299.246	174	1515
6	57337.9	316.206	193	859		6	38086.8	297.681	185	727		6	39086.7	338.856	191	1262
7	61625	319.067	166	814		7	47257.7	292.022	175	663		7	38177.4	303.582	175	1511
8	52750.9	356.55	170	1025		8	47585.8	351.243	202	723		8	34743.3	350.846	219	744
9	52913.4	342.887	205	911		9	49095	319.347	190	718		9	37049.4	379.18	205	1091
10	50141.8	366.978	222	1006		10	57197.3	371.08	201	1076		10	28197.1	350.914	206	1105
11	57797.3	389.927	200	1428		11	52813.4	330.105	185	699		11	28606.5	404.434	191	2172
12	60909.4	367.973	206	923		12	38846.1	314.535	196	621		12	41580.2	313.608	184	2026
13	45814.1	349.851	217	947		13	53416.4	326.551	194	804		13	35590.1	356.338	176	2206
14	47454.6	371.35	205	1048		14	61812.5	332.218	190	804		14	40824	332.505	178	1586
15	45923.5	371.144	209	783		15	68933.6	291.775	182	565		15	42167.6	304.862	181	1511
16	44695.5	350.464	217	871		16	49791.8	309.095	194	636		16	35493.3	349.059	173	826
17	58631.5	327.313	169	814		17	49498.1	298.502	175	600		17	103589	235.632	160	816
18	58744	390.268	218	873		18	45092.3	289.876	173	663
19	42967.5	344.362	204	678		19	39974.1	311.324	190	563
20	52854	368.665	209	783		20	42501.9	275.118	179	473
21	112760	257.819	179	848		21	85366.3	211.232	138	495
	4mcherry EV						4mcherry atf6							4mcherry rsks1
1	47089	1138.84	243	4356		1	58706.5	1095.96	189	2573			1	52479	1306.34	299	6015
2	58272.2	1153.64	240	5570		2	58428.4	1108.83	194	2988			2	44970.4	1427.29	345	8358
3	60550.1	1198.8	431	6057		3	64640.3	1267.82	195	4367			3	53744.5	1365.72	374	10371
4	53263.3	1225.12	233	8440		4	60253.3	1140.34	431	4367			4	46807.7	1464.98	231	6114
5	59643.9	1269.53	273	8388		5	50504.2	1293.06	410	4478			5	38439.8	1402.53	277	7552
6	47520.2	1158.73	378	5359		6	67136.9	1285.42	433	4439			6	48179.5	1431.21	495	7391
7	54119.5	1095.19	271	5584		7	61209.4	1295.66	241	4304			7	54078.9	1210	221	7355
8	54591.3	1133.85	269	4024		8	58440.9	1399.86	409	5336			8	50285.5	1057.33	226	10862
9	56922.3	1177.1	419	6487		9	53250.8	1500.07	376	6177			9	42786.3	1378.77	357	6015
10	40024.1	912.648	171	3628		10	65912.1	1402.07	516	4534			10	44301.7	1623.2	448	7329
11	50163.7	959.879	205	4799		11	58965.9	1304.94	386	4097			11	39592.9	1592.88	544	5647
12	57256.7	955.319	154	5385		12	50638.6	1325.6	413	4439			12	49085.6	1543.42	641	6961
13	47760.8	920.37	175	5551		13	60109.5	1298.48	371	4304			13	39217.9	1545.67	662	7000
14	44573.6	1030.21	167	6784		14	60250.1	1411.88	498	5058			14	42736.3	1121.48	342	7936
15	44957.9	982.692	227	6465		15	64037.2	1133.03	379	3495			15	53410.2	1082.51	342	8601
16	46876.5	1199.38	283	5449		16	48217	1340.02	400	5121			16	51791.6	1471.58	528	7000
17	51272.9	1109.1	162	4623		17	62809.2	1305.36	307	4367			17	48607.6	1317.05	299	7251
18	50735.5	1079.4	311	2629		18	57025.5	1419.17	430	4581			18	54472.6	1273.23	257	6156
19	49541.8	1200.92	270	4175		19	66546.4	1399.91	470	3745			19	46907.7	1028.26	335	8601
20	50354.3	1233.15	174	4311		20	89053.5	228.276	149	822			20	63493.6	211.46	148	323
21	229564	235.2	159	614

## Sheet: Sheet2
fmo2mcherry EV	Fluoresence Intentsity	BGC	Mean	Standard Dev		Max	BGC	Mean	Standard Dev				fmo2mcherry atf-6	Fluoresence Intentsity	BGC	Mean	Standard Dev		Max	BGC	Mean	Standard Dev		fmo2mcherry rsks-1	Fluoresence Intentsity	BGC	Mean	Standard Dev		Max	BGC	Mean	Standard Dev		fmo4mcherry EV	Fluoresence Intentsity	BGC	Mean	Standard Dev		Max	BGC	Mean	Standard Dev		fmo4mcherry atf-6	Fluoresence Intentsity	BGC	Mean
1	291.331	33.512	85.3137	30.1558			0	0	0				1	239.483	28.251	90.0862	33.2877			0	0	0		1	295.453	59.821	95.0765	32.7594			0	0	0		1	1138.84	903.636	871.493	110.757			0	0	0		1	1095.96	867.682	1073.17
2	300.075	42.256	85.3137				0						2	257.109	45.877					0				2	297.821	62.189					0				2	1153.64	918.442	871.493				0				2	1108.83	880.554
3	298.667	40.848					0						3	261.334	50.102					0				3	294.46	58.828					0				3	1198.8	963.595					0				3	1267.82	1039.54
4	321.894	64.075					0						4	258.518	47.286					0				4	320.172	84.54					0				4	1225.12	989.921					0				4	1140.34	912.061
5	317.683	59.864					0						5	299.447	88.215					0				5	299.246	63.614					0				5	1269.53	1034.33					0				5	1293.06	1064.78
6	316.206	58.387					0						6	297.681	86.449					0				6	338.856	103.224					0				6	1158.73	923.532					0				6	1285.42	1057.14
7	319.067	61.248					0						7	292.022	80.79					0				7	303.582	67.95					0				7	1095.19	859.992					0				7	1295.66	1067.39
8	356.55	98.731					0						8	351.243	140.011					0				8	350.846	115.214					0				8	1133.85	898.648					0				8	1399.86	1171.58
9	342.887	85.068											9	319.347	108.115					0				9	379.18	143.548					0				9	1177.1	941.902					0				9	1500.07	1271.8
	366.978	109.159											10	371.08	159.848					0				10	350.914	115.282					0				10	912.648	677.448					0				10	1402.07	1173.8
	389.927	132.108											11	330.105	118.873					0				11	404.434	168.802					0				11	959.879	724.679					0				11	1304.94	1076.67
	367.973	110.154											12	314.535	103.303					0				12	313.608	77.976					0				12	955.319	720.119					0				12	1325.6	1097.33
	349.851	92.032											13	326.551	115.319					0				13	356.338	120.706					0				13	920.37	685.17					0				13	1298.48	1070.2
	371.35	113.531											14	332.218	120.986					0				14	332.505	96.873					0				14	1030.21	795.01					0				14	1411.88	1183.61
	371.144	113.325											15	291.775	80.543					0				15	304.862	69.23					0				15	982.692	747.492					0					1133.03	904.75
	350.464	92.645											16	309.095	97.863					0				16	349.059	113.427					0				16	1199.38	964.178					0					1340.02	1111.74
	327.313	69.494											17	298.502	87.27					0				17	235.632						0				17	1109.1	873.897										1305.36	1077.09
	390.268	132.449											18	289.876	78.644					0				18												1079.4	844.202										1419.17	1190.9
	344.362	86.543											20	311.324	100.092																					1200.92	965.721										1399.91	1171.63
	368.665	110.846												275.118	63.886																					1233.15	997.951										228.276
	257.819													211.232																						235.2
		2mcherry ev norm
	33.512	0.392809	0.331142	0.701188
	42.256	0.495301	0.537745	0.728945
	40.848	0.478797	0.587268	0.689549																																4mcherry ev norm	4mcherry atf6 norm
	64.075	0.751051	0.55426	0.990931																																1.03688	0.995627
	59.864	0.701692	1.03401	0.745648																																1.05387	1.0104
	58.387	0.68438	1.01331	1.20993																																1.10568	1.19283
	61.248	0.717915	0.946975	0.796472																																1.13589	1.04655
	98.731	1.15727	1.64113	1.35047																																1.18685	1.22179
	85.068	0.997119	1.26726	1.68259																																1.05971	1.21302
	109.159	1.2795	1.87365	1.35127																																0.986803	1.22478
	132.108	1.5485	1.39336	1.9786																																1.03116	1.34434
	110.154	1.29116	1.21086	0.913991																																1.08079	1.45933
	92.032	1.07875	1.3517	1.41485																																0.777341	1.34688
	113.531	1.33075	1.41813	1.13549																																0.831537	1.23543
	113.325	1.32833	0.94408	0.811475																																0.826305	1.25914
	92.645	1.08593	1.1471	1.32953																																0.786202	1.22801
	69.494	0.81457	1.02293																																	0.912239	1.35814
	132.449	1.55249	0.921821																																	0.857714	1.03816
	86.543	1.01441	1.17322																																	1.10635	1.27567
	110.846	1.29927	0.748836																																	1.00276	1.23591
																																				0.968684	1.3665
																																				1.10812	1.3444
																																				1.1451
[truncated: 14 more columns]
