# Supplementary material for: fmo-4 promotes longevity and stress resistance via ER to mitochondria calcium regulation in C. elegans
Source: eLife journal article supplement (doi:10.7554/elife.99971), 2024-08-27
Supplement: fig7-data1 [file elife-99971-fig7-data1-v1.zip]

## Sheet: Sheet1
	2mcherry EV day 1 rnai							2mcherry atf6 day 1 RNAi						4mcherry EV day 1 RNAi							4mcherry atf6 day 1 RNAi
1	65429.7	564.879	401	891			1	69711.4	570.52	317	1141			1	76377.6	902.905	422	1622			1	59476.7	972.878	322	2185
2	65539.6	557.187	401	994			2	57240	541.86	335	1018			2	65841.2	1066.04	460	2599			2	77521	904.353	407	2701
3	76917.9	581.9	392	1017			3	44686.8	546.433	358	1166			3	73361.8	971.244	435	2681			3	48918.3	992.922	465	3157
4	73958.7	566.57	398	932			4	61436.9	654.031	373	1311			4	60626.4	1019.9	482	2777			4	60208.6	1163.88	439	2744
5	64116.6	566.543	388	1035			5	55386.5	580.972	373	1133			5	62624.4	964.558	455	2582			5	69032.9	1242.38	509	2870
6	47944.5	589.601	388	1220			6	57356.2	646.962	403	1587			6	57076.6	1026.72	478	2946			6	62944.8	1228.42	551	2524
7	59351	628.317	424	1076			7	55942.6	609.807	428	1120			7	54541.5	1078.63	439	2393			7	61125.9	1198.05	594	2254
8	50269.1	597.848	417	1037			8	61914.4	635.308	410	1099			8	70826.6	1194.33	488	3862			8	61443.2	1112.27	473	2450
9	64016	599.154	428	940			9	58782.4	645.805	410	1318			9	63318.6	1102.76	446	2610			9	49018.9	1024.46	339	2385
10	57327.9	612.322	406	1095			10	54827.4	639.016	447	1571			10	47922.5	1192.32	486	4071			10	67999.4	1205.63	511	2524
11	67967.9	585.274	420	907			11	52277.6	593.745	433	1216			11	61477.8	1064.89	512	2866			11	104132	335.713	202	548
12	49455.5	591.013	435	1173			12	61261	606.965	391	1166			12	71706.2	1059.23	483	3333
13	52103.7	583.942	417	914			13	129710	556.376	422	754			13	65395.1	1076.29	473	3494
14	71090.5	567.401	408	937										14	65395.1	1076.29	473	3494
15	103384	521.647	358	1139										15	77819.5	1040.74	381	3298
														16	66215	932.588	486	2067
														17	83533.7	929.135	461	2864
														18	81922.2	931.09	419	2856
														19	107437	576.586	446	788
	2mcherry ev day 2 rnai							2mcherry atf6 day 2 rnai						4mcherry ev day 2 rnai							4mcherry atf6 day 2 rnai
1	74952.7	553.417	308	1422			1	83744.3	719.057	355	1776			1	85425.8	807.303	368	2029			1	78443.7	901.56	344	2048
2	75314.6	549.991	314	1032			2	72513	703.872	399	2030			2	78712.1	780.621	393	2094			2	84611.6	897.043	484	2416
3	84932.9	511.946	326	1116			3	86258.8	614.507	347	2210			3	60888.7	842.102	408	1961			3	87254	853.382	397	1892
4	90289.6	571.449	331	1124			4	80530.9	684.197	379	2084			4	82034.6	966.22	405	2838			4	77333.1	899.507	325	3204
5	84486.8	585.903	353	1901			5	78365.8	760.524	340	2944			5	73511.4	928.512	404	2838			5	78225.4	880.095	366	2265
6	94404.5	576.388	366	1664			6	80362.4	682.668	380	2772			6	92504.6	1040.73	404	2336			6	74200.8	839.884	391	2029
7	91915	563.604	354	1290			7	83563.3	730.263	344	2213			7	72403.9	937.295	415	2565			7	74019.9	781.292	394	2094
8	81900.5	583.638	369	1296			8	83903.4	742.743	362	2450			8	89157.1	993.862	339	3050			8	54524.4	843.869	424	1961
9	87622.1	633.166	360	1620			9	93434.3	648.009	352	2528			9	97863.3	949.557	404	2526			9	81413.8	962.174	405	2838
10	75517.4	917.94	361	6530			10	59959.1	583.491	387	1404			10	76518.8	922.072	514	2036			10	83432.3	922.703	415	2534
11	78646.5	572.881	348	1731			11	71053	599.171	332	1870			11	76643.6	867.178	411	1999			11	80013	1055.82	377	2336
12	59775	576.934	348	1402			12	59172.9	548.279	296	1803			12	81654	1024.86	429	3378			12	51476.4	971.813	489	2440
13	79938.1	590.263	315	1687			13	73121.4	622.676	296	2127			13	68323.2	911.977	341	2150			13	73252.4	1027.79	397	3050
14	76041.5	517.968	302	1138			14	74768.6	588.273	284	1710			14	68781.8	981.126	389	2512			14	85762.8	976.073	355	2526
15	83407.3	494.241	279	1183			15	85659.8	556.635	247	1929			15	63228.6	947.444	564	1784			15	88504	915.664	485	2186
16	84611.6	450.736	279	966			16	74041.7	672.625	277	1971			16	73264.9	864.408	359	2265			16	78403.2	876.261	418	1999
17	111423	474.44	335	669			17	64304.9	672.032	312	2344			17	81504.3	894.703	355	3204			17	82455.8	1015.9	447	3378
							18	76069.6	650.747	358	2255			18	87625.3	882.233	350	2048			18	35209.8	295.919	213	444
							19	109720	1201.02	373	3603			19	82352.8	887.088	285	2416
							20	69908	658.547	356	2160			20	68048.6	853.803	434	1892
							21	66828.8	647.954	302	1830			21	87759.4	477.919	346	735
							22	75242.9	697.888	349	2030
							23	92860.3	699.477	355	1544
							24	111966	419.542	273	1045
	2mcherry ev rnai fudr day 2							2mcherry atf6 rnai fudr day2							4mcherry ev rnai fudr day 2								4mcherry atf6 rnai fudr day 2
1	90395.6	1138.19	347	5423			1	103015	598.803	248	2783			1	61497.1	890.448	386	3077					1	80983.2	1034.62	377	2709
2	87247.8	629.667	335	3278			2	82583.7	525.445	313	2403			2	83529	831.978	392	2301					2	55379.2	966.431	452	2959
3	79251.8	634.782	326	2494			3	81270.3	499.607	282	1603			3	60835.7	868.46	434	2636					3	70522.6	1101.15	495	2879
4	84667.7	717.687	346	2252			4	58215.1	638.472	277	1267			4	87332	873.787	417	3238					4	79654.2	1117.35	481	2466
5	88236.7	687.401	353	2252			5	70110.8	554.723	294	1127			5	71514.7	908.645	425	2096					5	86558.3	969.364	383	2530
6	95462.1	646.189	315	1712			6	63010.2	590.598	338	1449			6	98781.6	1225.91	454	6683					6	78187.9	1033.28	423	3157
7	69374.5	550.232	342	1630			7	68706.9	554.091	309	1671			7	57662.9	922.1	400	2842					7	76060.2	1091.65	343	4091
8	73605	683.207	357	1809			8	82365.3	632.801	329	3104			8	92470.3	941.42	343	2897					8	68472.9	966.43	431	3141
9	86495.9	713.951	367	2210			9	65250.2	612.663	350	1633			9	89874.6	1086.05	370	3237					9	60009	1008.46	337	2835
10	80699.4	718.994	388	2210			10	73339.8	620.729	356	1620			10	84315.2	857.649	356	3042					10	66966.1	978.094	347	2563
11	89515.8	768.836	388	2195			11	66130	540.239	349	1666			11	83266.9	875.722	372	2061					11	84134.2	950.218	325	2563
12	74709.4	798.502	394	2488			12	71861	576.954	352	1875			12	69929.9	997.402	470	2632					12	70441.5	910.699	325	2687
13	85082.6	753.064	355	2754			13	74565.9	593.673	357	1156			13	95328	908.707	421	3079					13	82296.7	828.702	328	2381
14	80427.9	644.007	362	2083			14	77089.8	594.885	358	1513			14	95973.8	887.117	344	2285					14	89868.4	817.581	297	1761
15	89927.7	731.323	362	2234			15	64432.8	618.006	365	1340			15	87715.7	1075.4	399	3847					15	75021.4	781.265	328	1665
16	69636.6	672.11	384	1885			16	80103.5	608.824	351	1898			16	74372.4	922.457	420	3847					16	68145.4	975.842	368	3082
17	76765.3	841.324	419	3186			17	71867.3	597.114	351	2045			17	105445	814.106	404	2745					17	65053.7	901.109	438	3013
18	70372.9	787.724	365	3911			18	65914.7	574.814	354	1679			18	75192.9	775.471	401	1665					18	82898.8	1026.37	420	2916
19	59272.7	894.125	374	2999			19	76022.8	598.205	308	1627			19	92495.2	797.331	378	2242					19	66488.8	1083.12	483	2427
20	74512.8	757.942	426	2473			20	67287.4	674.566	364	1481			20	85042.1	719.38	390	2166					20	91188.1	1070.91	451	3835
21	77713.7	693.261	398	1522			21	50396.9	291.558	197	426			21	100416	701.764	248	1811					21	85619.2	1015.15	375	3667
22	72113.7	624.962	272	1358										22	180535	499.04	367	784					22	41957.9	354.702	221	537
23	84542.9	564.226	310	1207
24	90695.1	575.921	259	1269
25	67274.9	462.092	342	695

## Sheet: fmo2
fmo2mcherry EV day 1	Fluoresence Intentsity	BGC	Mean	Standard Dev		Max	BGC	Mean	Standard Dev				fmo2mcherry atf-6 day 1	Fluoresence Intentsity	BGC	Mean	Standard Dev		Max	BGC	Mean	Standard Dev		fmo2mcherry ev rnai day 2	Fluoresence Intentsity	BGC	Mean	Standard Dev		Max	BGC	Mean	Standard Dev		fmo2mcherry atf6 rnai day 2	Fluoresence Intentsity	BGC	Mean	Standard Dev		Max	BGC	Mean	Standard Dev		fmo2mcherry ev fudr day 2	Fluoresence Intentsity	BGC	Mean
1	564.879	43.232	63.4924	20.0472			0	0	0				1	570.52	14.144	49.576	39.5788			0	0	0		1	553.417	78.977	103.714	100.563			0	0	0		1	719.057	299.515	262.399	133.119			0	0	0		1	1138.19	676.102	255.726
2	557.187	35.54	63.4924				0						2	541.86	-14.516					0				2	549.991	75.551	103.714				0				2	703.872	284.33					0				2	629.667	167.575	255.726
3	581.9	60.253					0						3	546.433	-9.943					0				3	511.946	37.506					0				3	614.507	194.965					0				3	634.782	172.69
4	566.57	44.923					0						4	654.031	97.655					0				4	571.449	97.009					0				4	684.197	264.655					0				4	717.687	255.595
5	566.543	44.896					0						5	580.972	24.596					0				5	585.903	111.463					0				5	760.524	340.982					0				5	687.401	225.309
6	589.601	67.954					0						6	646.962	90.586					0				6	576.388	101.948					0				6	682.668	263.126					0				6	646.189	184.097
7	628.317	106.67					0						7	609.807	53.431					0				7	563.604	89.164					0				7	730.263	310.721					0				7	550.232	88.14
8	597.848	76.201					0						8	635.308	78.932					0				8	583.638	109.198					0				8	742.743	323.201					0				8	683.207	221.115
9	599.154	77.507											9	645.805	89.429					0				9	633.166	158.726					0				9	648.009	228.467					0				9	713.951	251.859
	612.322	90.675											10	639.016	82.64					0				10	917.94	443.5					0				10	583.491	163.949					0				10	718.994	256.902
	585.274	63.627											11	593.745	37.369					0				11	572.881	98.441					0				11	599.171	179.629					0				11	768.836	306.744
	591.013	69.366											12	606.965	50.589					0				12	576.934	102.494					0				12	548.279	128.737					0				12	798.502	336.41
	583.942	62.295											13	556.376						0				13	590.263	115.823					0				13	622.676	203.134					0				13	753.064	290.972
	567.401	45.754											14							0				14	517.968	43.528					0				14	588.273	168.731					0				14	644.007	181.915
	521.647												15							0				15	494.241	19.801					0				15	556.635	137.093					0					731.323	269.231
													16							0				16	450.736	-23.704					0				16	672.625	253.083					0					672.11	210.018
													17							0				17	474.44						0				17	672.032	252.49										841.324	379.232
													18							0				18												650.747	231.205										787.724	325.632
													20																							1201.02	781.474										894.125	432.033
																										ev norm	atf6 norm									658.547	239.005										757.942	295.85
																									78.977	0.761488	2.88789									647.954	228.412										693.261	231.169
		2mcherry ev norm	atf6 norm																						75.551	0.728455	2.74148									697.888	278.346										624.962	162.87
	43.232	0.680901	0.222767																						37.506	0.361629	1.87983									699.477	279.935										564.226	102.134
	35.54	0.559752	-0.228626																						97.009	0.93535	2.55178									419.542											575.921	113.829
	60.253	0.94898	-0.156602																						111.463	1.07471	3.28771																				462.092
	44.923	0.707534	1.53806																						101.948	0.982972	2.53703
	44.896	0.707109	0.387385																						89.164	0.85971	2.99594
	67.954	1.07027	1.42672																						109.198	1.05288	3.11627
	106.67	1.68004	0.841534																						158.726	1.53042	2.20285
	76.201	1.20016	1.24317																						443.5	4.27618	1.58078
	77.507	1.22073	1.4085										mcherry induction	0.780818					gfp Induction	#DIV/0!				gfp Induction	98.441	0.949158	1.73196			gfp Induction	#DIV/0!				mcherry induction	1					gfp Induction	#DIV/0!				mcherry induction	0.974568
	90.675	1.42812	1.30157																						102.494	0.988236	1.24127
	63.627	1.00212	0.588559																						115.823	1.11675	1.9586																					ev norm	atf6 norm
	69.366	1.09251	0.796773																						43.528	0.419692	1.62689																					2.64385	1.20146
	62.295	0.981142																							19.801	0.190919	1.32184																					0.655291	0.9146
	45.754	0.720622																							-23.704	-0.228551	2.4402																					0.675293	0.813562
																											2.43448																					0.999488	1.35659
																											2.22925																					0.881056	1.02909
																											7.53489																					0.7199	1.16938
																											2.30446																					0.344666	1.02662
																											2.20232																					0.864656	1.33441
																											2.68378																					0.984879	1.25566
																											2.6991																					1.0046	1.2872
																																																1.1995	0.972451
																																																1.31551	1.11602
																																																1.13783	1.1814
																																																0.711367	1.18614
																																																1.05281	1.27655
																																																0.821262	1.24065
																																																1.48296	1.19486
																																																1.27336	1.10765
																																																1.68944	1.19912
																																																1.1569	1.49773
																																																0.903972
																																																0.636893
																																																0.399388
																																																0.445121
[truncated: 14 more columns]

## Sheet: fmo4
fmo4mcherry EV day 1	Fluoresence Intentsity	BGC	Mean	Standard Dev		Max	BGC	Mean	Standard Dev				fmo4mcherry atf-6 day 1	Fluoresence Intentsity	BGC	Mean	Standard Dev		Max	BGC	Mean	Standard Dev		fmo4mcherry ev rnai day 2	Fluoresence Intentsity	BGC	Mean	Standard Dev		Max	BGC	Mean	Standard Dev		fmo4mcherry atf6 rnai day 2	Fluoresence Intentsity	BGC	Mean	Standard Dev		Max	BGC	Mean	Standard Dev		fmo4mcherry ev fudr day 2	Fluoresence Intentsity	BGC	Mean
1	902.905	326.319	458.394	84.6378			0	0	0				1	972.878	637.165	768.812	121.643			0	0	0		1	807.303	329.384	436.236	177.146			0	0	0		1	901.56	605.641	622.954	73.9764			0	0	0		1	890.448	391.408	400.07
2	1066.04	489.452	458.394				0						2	904.353	568.64					0				2	780.621	302.702	436.236				0				2	897.043	601.124					0				2	831.978	332.938	400.07
3	971.244	394.658					0						3	992.922	657.209					0				3	842.102	364.183					0				3	853.382	557.463					0				3	868.46	369.42
4	1019.9	443.314					0						4	1163.88	828.167					0				4	966.22	488.301					0				4	899.507	603.588					0				4	873.787	374.747
5	964.558	387.972					0						5	1242.38	906.663					0				5	928.512	450.593					0				5	880.095	584.176					0				5	908.645	409.605
6	1026.72	450.132					0						6	1228.42	892.711					0				6	1040.73	562.816					0				6	839.884	543.965					0				6	1225.91	726.875
7	1078.63	502.044					0						7	1198.05	862.337					0				7	937.295	459.376					0				7	781.292	485.373					0				7	922.1	423.06
8	1194.33	617.739					0						8	1112.27	776.557					0				8	993.862	515.943					0				8	843.869	547.95					0				8	941.42	442.38
9	1102.76	526.169											9	1024.46	688.746					0				9	949.557	471.638					0				9	962.174	666.255					0				9	1086.05	587.013
	1192.32	615.735											10	1205.63	869.92					0				10	922.072	444.153					0				10	922.703	626.784					0				10	857.649	358.609
	1064.89	488.305											11	335.713						0				11	867.178	389.259					0				11	1055.82	759.904					0				11	875.722	376.682
	1059.23	482.649											12							0				12	1024.86	546.939					0				12	971.813	675.894					0				12	997.402	498.362
	1076.29	499.701											13							0				13	911.977	434.058					0				13	1027.79	731.868					0				13	908.707	409.667
	1076.29	499.701											14							0				14	981.126	503.207					0				14	976.073	680.154					0				14	887.117	388.077
	1040.74	464.156											15							0				15	947.444	469.525					0				15	915.664	619.745					0					1075.4	576.364
	932.588	356.002											16							0				16	864.408	386.489					0				16	876.261	580.342					0					922.457	423.417
	929.135	352.549											17							0				17	894.703	416.784					0				17	1015.9	719.984										814.106	315.066
	931.09	354.504											18							0				18	882.233	404.314										295.919											775.471	276.431
	576.586												20												887.088	409.169																					797.331	298.291
																									853.803	375.884																					719.38	220.34
		day 1 RNAi																							477.919																						701.764	202.724
		4mcherry ev norm	4mcherry atf6 induction																																												499.04
	33.512	0.0731073	1.38999
	42.256	0.0921826	1.2405																							ev norm	atf6 norm
	40.848	0.089111	1.43372																							0.755059	1.38833																					ev norm	atf6 norm
	64.075	0.139781	1.80667																							0.693895	1.37798																					0.978348	1.69949
	59.864	0.130595	1.97791																							0.834831	1.27789																					0.832199	1.52905
	58.387	0.127373	1.94747																							1.11935	1.38363																					0.923388	1.8658
	61.248	0.133614	1.88121																							1.03291	1.33913																					0.936703	1.90629
	98.731	0.215384	1.69408																							1.29016	1.24695																					1.02383	1.53639
	85.068	0.185578	1.50252																							1.05305	1.11264			gfp Induction	#DIV/0!				mcherry induction	1					gfp Induction	#DIV/0!				mcherry induction	0.642215	1.81687	1.69614
	109.159	0.238133	1.89775																							1.18272	1.25609																					1.05746	1.84206
	132.108	0.288197																								1.08115	1.52728																					1.10576	1.52905
	110.154	0.240304																								1.01815	1.4368																					1.46727	1.63412
	92.032	0.20077																								0.892313	1.74196																					0.896365	1.55821
	113.531	0.247671																								1.25377	1.54938																					0.94154	1.48853
	113.325	0.247222																								0.995008	1.67769																					1.24569	1.38975
	92.645	0.202108																								1.15352	1.55914																					1.02399	1.18479
	69.494	0.151603																								1.07631	1.42066																					0.970022	1.15699
	132.449	0.288941																								0.885963	1.33034																					1.44066	1.06622
	86.543	0.188796																								0.95541	1.65045																					1.05836	1.55258
	110.846	0.241814																								0.926824																						0.787527	1.36578
																										0.937954																						0.690956	1.67886
																										0.861653																						0.745596	1.82073
																																																0.550753	1.7902
																																																0.506721	1.65083
[truncated: 14 more columns]
