# Supplementary material for: fmo-4 promotes longevity and stress resistance via ER to mitochondria calcium regulation in C. elegans
Source: eLife journal article supplement (doi:10.7554/elife.99971), 2024-08-27
Supplement: fig7-data4 [file elife-99971-fig7-data4-v1.zip]

## Sheet: data
strain	day	alive	dead-total	dead-normal	dead-ruptured	censored	ratio-alive	percentage-alive
N2	0	59	0			0	1	100
N2	1	56	3	3		0	0.949153	94.9153
N2	5	43	16	13		0	0.728814	72.8814						1	2	3	4	5	6	7	8	9	10	11	12
N2	7	28	31	15		0	0.474576	47.4576			plot data here-->		day	WT; EV RNAi	FMO-4 OE; EV RNAi	FMO-4 KO; EV RNAi	WT; atf-6 RNAi	FMO-4 OE; atf-6 RNAi	FMO-4 KO; atf-6 RNAi	WT; crt-1 RNAi	FMO-4 OE; crt-1 RNAi	FMO-4 KO; crt-1 RNAi	WT; itr-1 RNAi	FMO-4 OE; itr-1 RNAi	FMO-4 KO; itr-1 RNAi	WT; mcu-1 RNAi	FMO-4 OE; mcu-1 RNAi	FMO-4 KO; mcu-1 RNAi
N2	9	19	40	9		0	0.322034	32.2034				0	0	100	100	100	100	100	100	100	100	100	100	100	100	100	100	100
N2	12	4	55	15		0	0.0677966	6.77966				1	1	94.9153	100	95.4545	100	100	95.4023	98.4615	100	98.75	95.8904	97.8723	95.098	92.8571	96.1538	92.9412
N2	14	0	59	4		0	0	0				5	5	72.8814	85.3333	73.8636	89.7727	87.5	70.1149	83.0769	82.6667	80	64.3836	72.3404	67.6471	64.2857	69.2308	65.8824
N2	16	0	59			0	0	0				7	7	47.4576	73.3333	45.4545	81.8182	80.6818	41.3793	78.4615	76	70	31.5068	41.4894	14.7059	39.2857	44.8718	27.0588
N2	19	0	59			0	0	0				9	9	32.2034	64	29.5455	76.1364	73.8636	19.5402	70.7692	68	58.75	13.6986	26.5957	3.92157	23.2143	28.2051	11.7647
N2	21	0	59			0	0	0				12	12	6.77966	52	5.68182	60.2273	65.9091	9.1954	50.7692	54.6667	43.75	2.73973	7.44681	0.980392	5.35714	5.12821	2.35294
N2	23	0	59			0	0	0				14	14	0	36	0	43.1818	44.3182	0	33.8462	40	27.5	0	0	0	0	0	0
N2	25	0	59			0	0	0				16	16		24		21.5909	28.4091		16.9231	20	15
N2	27	0	59			0	0	0				19	19		5.33333		5.68182	6.81818		4.61538	6.66667	0
N2	29	0	59			0	0	0				21	21		0		0	1.13636		0	1.33333
N2	31	0	59			0	0	0				23	23					0			0
N2	34	0	59			0	0	0				25	25
N2	36	0	59			0	0	0				27	27
N2	38	0	59			0	0	0				29	29
N2	41	0	59			0	0	0				31	31
												34	34
4OE	0	75	0			0	1	100				36	36
4OE	1	75	0	0		0	1	100				38	38
4OE	4	64	11	11		0	0.853333	85.3333				41	41
4OE	6	55	20	9		0	0.733333	73.3333
4OE	8	48	27	7		0	0.64	64
4OE	11	39	36	9		0	0.52	52
4OE	13	27	48	12		0	0.36	36
4OE	15	18	57	9		0	0.24	24
4OE	18	4	71	14		0	0.0533333	5.33333
4OE	20	0	75	4		0	0	0
4OE	22	0	75			0	0	0
4OE	24	0	75			0	0	0
4OE	27	0	75			0	0	0
4OE	29	0	75			0	0	0
4OE	31	0	75			0	0	0
4OE	34	0	75			0	0	0
4OE	36	0	75			0	0	0
4OE	38	0	75			0	0	0
4OE	41	0	75			0	0	0
4KO	0	88	0			0	1	100
4KO	1	84	4	4		0	0.954545	95.4545
4KO	4	65	23	19		0	0.738636	73.8636
4KO	6	40	48	25		0	0.454545	45.4545
4KO	8	26	62	14		0	0.295455	29.5455
4KO	11	5	83	21		0	0.0568182	5.68182
4KO	13	0	88	5		0	0	0
4KO	15	0	88			0	0	0
4KO	18	0	88			0	0	0
4KO	20	0	88			0	0	0
4KO	22	0	88			0	0	0
4KO	24	0	88			0	0	0
4KO	27	0	88			0	0	0
4KO	29	0	88			0	0	0
4KO	31	0	88			0	0	0
4KO	34	0	88			0	0	0
4KO	36	0	88			0	0	0
4KO	38	0	88			0	0	0
4KO	41	0	88			0	0	0
N2 atf-6	0	88	0			0	1	100
N2 atf-6	1	88	0	0		0	1	100
N2 atf-6	4	79	9	9		0	0.897727	89.7727
N2 atf-6	6	72	16	7		0	0.818182	81.8182
N2 atf-6	8	67	21	5		0	0.761364	76.1364
N2 atf-6	11	53	35	14			0.602273	60.2273
N2 atf-6	13	38	50	15		0	0.431818	43.1818
N2 atf-6	15	19	69	19		0	0.215909	21.5909
N2 atf-6	18	5	83	14		0	0.0568182	5.68182
N2 atf-6	20	0	88	5		0	0	0
N2 atf-6	22	0	88			0	0	0
N2 atf-6	24	0	88			0	0	0
N2 atf-6	27	0	88			0	0	0
N2 atf-6	29	0	88			0	0	0
N2 atf-6	31	0	88			0	0	0
N2 atf-6	34	0	88			0	0	0
N2 atf-6	36	0	88			0	0	0
N2 atf-6	38	0	88			0	0	0
N2 atf-6	41	0	88			0	0	0
4OE; atf6	0	88	0			0	1	100
4OE; atf6	1	88	0	0		0	1	100
4OE; atf6	4	77	11	11		0	0.875	87.5
4OE; atf6	6	71	17	6		0	0.806818	80.6818
4OE; atf6	8	65	23	6		0	0.738636	73.8636
4OE; atf6	11	58	30	7		0	0.659091	65.9091
4OE; atf6	13	39	49	19		0	0.443182	44.3182
4OE; atf6	15	25	63	14		0	0.284091	28.4091
4OE; atf6	18	6	82	19		0	0.0681818	6.81818
4OE; atf6	20	1	87	5		0	0.0113636	1.13636
4OE; atf6	22	0	88	1		0	0	0
4OE; atf6	24	0	88			0	0	0
4OE; atf6	27	0	88			0	0	0
4OE; atf6	29	0	88			0	0	0
4OE; atf6	31	0	88			0	0	0
4OE; atf6	34	0	88			0	0	0
4OE; atf6	36	0	88			0	0	0
4OE; atf6	38	0	88			0	0	0
4OE; atf6	41	0	88			0	0	0
4KO; atf6	0	87	0			0	1	100
4KO; atf6	1	83	4	4		0	0.954023	95.4023
4KO; atf6	4	61	26	22		0	0.701149	70.1149
4KO; atf6	6	36	51	25		0	0.413793	41.3793
4KO; atf6	8	17	70	19		0	0.195402	19.5402
4KO; atf6	11	8	79	9		0	0.091954	9.1954
4KO; atf6	13	0	87	8		0	0	0
4KO; atf6	15	0	87			0	0	0
4KO; atf6	18	0	87			0	0	0
4KO; atf6	20	0	87			0	0	0
4KO; atf6	22	0	87			0	0	0
4KO; atf6	24	0	87			0	0	0
4KO; atf6	27	0	87			0	0	0
4KO; atf6	29	0	87			0	0	0
4KO; atf6	31	0	87			0	0	0
4KO; atf6	34	0	87			0	0	0
4KO; atf6	36	0	87			0	0	0
4KO; atf6	38	0	87			0	0	0
4KO; atf6	41	0	87			0	0	0
N2 crt1	0	65	0			0	1	100
N2 crt1	5	64	1	1		0	0.984615	98.4615
N2 crt1	7	54	11	10		0	0.830769	83.0769
N2 crt1	10	51	14	3		0	0.784615	78.4615
N2 crt1	13	46	19	5		0	0.707692	70.7692
N2 crt1	16	33	32	13		0	0.507692	50.7692
N2 crt1	17	22	43	11		0	0.338462	33.8462
N2 crt1	20	11	54	11		0	0.169231	16.9231
N2 crt1	22	3	62	8		0	0.0461538	4.61538
N2 crt1	24	0	65	3		0	0	0
N2 crt1	27	0	65			0	0	0
N2 crt1	29	0	65			0	0	0
N2 crt1	31	0	65			0	0	0
N2 crt1	34	0	65			0	0	0
N2 crt1	36	0	65			0	0	0
N2 crt1	38	0	65			0	0	0
N2 crt1	41	0	65			0	0	0
N2 crt1	44	0	65			0	0	0
N2 crt1	46	0	65			0	0	0
4OE crt1	0	75	0			0	1	100
4OE crt1	5	75	0	0		0	1	100
4OE crt1	7	62	13	13		0	0.826667	82.6667
4OE crt1	10	57	18	5		0	0.76	76
4OE crt1	13	51	24	6		0	0.68	68
4OE crt1	16	41	34	10		0	0.546667	54.6667
4OE crt1	17	30	45	11		0	0.4	40
4OE crt1	20	15	60	15		0	0.2	20
4OE crt1	22	5	70	10		0	0.0666667	6.66667
4OE crt1	24	1	74	4		0	0.0133333	1.33333
4OE crt1	27	0	75	1		0	0	0
4OE crt1	29	0	75			0	0	0
4OE crt1	31	0	75			0	0	0
4OE crt1	34	0	75			0	0	0
4OE crt1	36	0	75			0	0	0
4OE crt1	38	0	75			0	0	0
4OE crt1	41	0	75			0	0	0
4OE crt1	44	0	75			0	0	0
	46
4KO crt1	0	80	0			0	1	100
4KO crt1	5	79	1	1		0	0.9875	98.75
4KO crt1	7	64	16	15		0	0.8	80
4KO crt1	10	56	24	8		0	0.7	70
4KO crt1	13	47	33	9		0	0.5875	58.75
4KO crt1	16	35	45	12		0	0.4375	43.75
4KO crt1	17	22	58	13		0	0.275	27.5
4KO crt1	20	12	68	10		0	0.15	15
4KO crt1	22	0	80	12		0	0	0
4KO crt1	24	0	80			0	0	0
4KO crt1	27	0	80			0	0	0
4KO crt1	29	0	80			0	0	0
4KO crt1	31	0	80			0	0	0
4KO crt1	34	0	80			0	0	0
4KO crt1	36	0	80			0	0	0
4KO crt1	38	0	80			0	0	0
4KO crt1	41	0	80			0	0	0
4KO crt1	44	0	80			0	0	0
4KO crt1	46	0	80				0	0
4KO crt1	47	0	80				0	0
			80
N2 itr1	0	73	0			0	1	100
N2 itr1	5	70	3	3		0	0.958904	95.8904
N2 itr1	7	47	26	23		0	0.643836	64.3836
N2 itr1	10	23	50	24		0	0.315068	31.5068
N2 itr1	13	10	63	13		0	0.136986	13.6986
N2 itr1	16	2	71	8		0	0.0273973	2.73973
N2 itr1	17	0	73	2		0	0	0
N2 itr1	20	0	73			0	0	0
N2 itr1	22	0	73			0	0	0
N2 itr1	24	0	73			0	0	0
N2 itr1	27	0	73			0	0	0
N2 itr1	29	0	73			0	0	0
N2 itr1	31	0	73			0	0	0
N2 itr1	34	0	73			0	0	0
N2 itr1	36	0	73			0	0	0
N2 itr1	38	0	73			0	0	0
N2 itr1	41	0	73			0	0	0
N2 itr1	44	0	73			0	0	0
	46	0	73			0	0	0
	48	0	73			0	0	0
4OE itr1	0	94	0			0	1	100
4OE itr1	5	92	2	2		0	0.978723	97.8723
4OE itr1	7	68	26	24		0	0.723404	72.3404
4OE itr1	11	39	55	29		0	0.414894	41.4894
4OE itr1	13	25	69	14		0	0.265957	26.5957
4OE itr1	16	7	87	18		0	0.0744681	7.44681
4OE itr1	18	0	94	7		0	0	0
4OE itr1	20	0	94			0	0	0
4OE itr1	23	0	94			0	0	0
4OE itr1	25	0	94			0	0	0
4OE itr1	27	0	94			0	0	0
4OE itr1	30	0	94			0	0	0
4OE itr1	32	0	94			0	0	0
4OE itr1	34	0	94			0	0	0
4OE itr1	37	0	94			0	0	0
4OE itr1	39	0	94			0	0	0
4OE itr1	41	0	94			0	0	0
4OE itr1	44	0	94			0	0	0
	46
4KO itr1	0	102	0			0	1	100
4KO itr1	5	97	5	5		0	0.95098	95.098
4KO itr1	7	69	33	28		0	0.676471	67.6471
4KO itr1	11	15	87	54		0	0.147059	14.7059
4KO itr1	13	4	98	11		0	0.0392157	3.92157
4KO itr1	16	1	101	3		0	0.00980392	0.980392
4KO itr1	18	0	102	1		0	0	0
4KO itr1	20	0	102			0	0	0
4KO itr1	23	0	102			0	0	0
4KO itr1	25	0	102			0	0	0
4KO itr1	27	0	102			0	0	0
4KO itr1	30	0	102			0	0	0
4KO itr1	32	0	102			0	0	0
4KO itr1	34	0	102			0	0	0
4KO itr1	37	0	102			0	0	0
4KO itr1	39	0	102			0	0	0
4KO itr1	41	0	102			0	0	0
4KO itr1	44	0	102			0	0	0
	46
N2 mcu1	0	56	0			0	1	100
N2 mcu1	5	52	4	4		0	0.928571	92.8571
N2 mcu1	7	36	20	16		0	0.642857	64.2857
N2 mcu1	11	22	34	14		0	0.392857	39.2857
N2 mcu1	14	13	43	9		0	0.232143	23.2143
N2 mcu1	16	3	53	10		0	0.0535714	5.35714
N2 mcu1	18	0	56	3		0	0	0
N2 mcu1	21	0	56			0	0	0
N2 mcu1	23	0	56			0	0	0
N2 mcu1	25	0	56			0	0	0
N2 mcu1	28	0	56			0	0	0
N2 mcu1	30	0	56			0	0	0
N2 mcu1	32	0	56			0	0	0
N2 mcu1	35	0	56			0	0	0
N2 mcu1	37	0	56			0	0	0
N2 mcu1	39	0	56			0	0	0
N2 mcu1	42	0	56			0	0	0
N2 mcu1	44	0	56			0	0	0
N2 mcu1	45	0	56				0	0
4OE mcu1	0	78	0			0	1	100
4OE mcu1	5	75	3	3		0	0.961538	96.1538
4OE mcu1	7	54	24	21		0	0.692308	69.2308
4OE mcu1	11	35	43	19		0	0.448718	44.8718
4OE mcu1	14	22	56	13		0	0.282051	28.2051
4OE mcu1	16	4	74	18		0	0.0512821	5.12821
4OE mcu1	18	0	78	4		0	0	0
4OE mcu1	21	0	78			0	0	0
4OE mcu1	23	0	78			0	0	0
4OE mcu1	25	0	78			0	0	0
4OE mcu1	28	0	78			0	0	0
4OE mcu1	30	0	78			0	0	0
4OE mcu1	32	0	78			0	0	0
4OE mcu1	35	0	78			0	0	0
4OE mcu1	37	0	78			0	0	0
4OE mcu1	39	0	78			0	0	0
4OE mcu1	42	0	78			0	0	0
4OE mcu1	44	0	78			0	0	0
4KO mcu1	0	85	0			0	1	100
4KO mcu1	5	79	6	6		0	0.929412	92.9412
4KO mcu1	7	56	29	23		0	0.658824	65.8824
4KO mcu1	10	23	62	33		0	0.270588	27.0588
4KO mcu1	12	10	75	13		0	0.117647	11.7647
4KO mcu1	14	2	83	8		0	0.0235294	2.35294
4KO mcu1	17	0	85	2		0	0	0
4KO mcu1	19	0	85			0	0	0
4KO mcu1	21	0	85			0	0	0
4KO mcu1	24	0	85			0	0	0
4KO mcu1	26	0	85			0	0	0
4KO mcu1	29	0	85			0	0	0
4KO mcu1	31	0	85			0	0	0
4KO mcu1	33	0	85			0	0	0
4KO mcu1	35	0	85			0	0	0
4KO mcu1	38	0	85			0	0	0
4KO mcu1	40	0	85			0	0	0
4KO mcu1		0	85			0	0	0
16	0	156	0			0	1	100
16	5	156	0			0	1	100
16	7	156	0			0	1	100
16	10	156	0			0	1	100
16	12	156	0			0	1	100
16	14	156	0			0	1	100
16	17	156	0			0	1	100
16	19	156	0			0	1	100
16	21	156	0			0	1	100
16	24	156	0			0	1	100
16	26	156	0			0	1	100
16	29	156	0			0	1	100
16	31	156	0			0	1	100
16	33	156	0			0	1	100
16	35	156	0			0	1	100
16	38	156	0			0	1	100
16	40	156	0			0	1	100
16	42	156	0			0	1	100
17	0	134	0			0	1	100
17	5	134	0			0	1	100
17	7	134	0			0	1	100
17	10	134	0			0	1	100
17	12	134	0			0	1	100
17	14	134	0			0	1	100
17	17	134	0			0	1	100
17	19	134	0			0	1	100
17	21	134	0			0	1	100
17	24	134	0			0	1	100
17	26	134	0			0	1	100
17	29	134	0			0	1	100
17	31	134	0			0	1	100
17	33	134	0			0	1	100
17	35	134	0			0	1	100
17	38	134	0			0	1	100
17	40	134	0			0	1	100
17		134	0			0	1	100
18	0	233	0			0	1	100
18	5	233	0			0	1	100
18	7	233	0			0	1	100
18	10	233	0			0	1	100
18	12	233	0			0	1	100
18	14	233	0			0	1	100
18	17	233	0			0	1	100
18	19	233	0			0	1	100
18	21	233	0			0	1	100
18	24	233	0			0	1	100
18	26	233	0			0	1	100
18	29	233	0			0	1	100
18	31	233	0			0	1	100
18	33	233	0			0	1	100
18	35	233	0			0	1	100
18	38	233	0			0	1	100
18	40	233	0			0	1	100
18	42	233	0			0	1	100
18	45	233	0			0	1	100
19	0	142	0			0	1	100
19	5	142	0			0	1	100
19	7	142	0			0	1	100
19	10	142	0			0	1	100
19	12	142	0			0	1	100
19	14	142	0			0	1	100
19	17	142	0			0	1	100
19	19	142	0			0	1	100
19	21	142	0			0	1	100
19	24	142	0			0	1	100
19	26	142	0			0	1	100
19	29	142	0			0	1	100
19	31	142	0			0	1	100
19	33	142	0			0	1	100
19	35	142	0			0	1	100
19	38	142	0			0	1	100
19	40	142	0			0	1	100
19		142	0			0	1	100
20	0	227	0			0	1	100
20	5	227	0			0	1	100
20	7	227	0			0	1	100
20	10	227	0			0	1	100
20	12	227	0			0	1	100
20	14	227	0			0	1	100
20	17	227	0			0	1	100
20	19	227	0			0	1	100
20	21	227	0			0	1	100
20	24	227	0			0	1	100
20	26	227	0			0	1	100
20	29	227	0			0	1	100
20	31	227	0			0	1	100
20	33	227	0			0	1	100
20	35	227	0			0	1	100
20	38	227	0			0	1	100
20	40	227	0			0	1	100
20		227	0			0	1	100
21	0	154	0			0	1	100
21	5	154	0			0	1	100
21	7	154	0			0	1	100
21	10	154	0			0	1	100
21	12	154	0			0	1	100
21	14	154	0			0	1	100
21	17	154	0			0	1	100
21	19	154	0			0	1	100
21	21	154	0			0	1	100
21	24	154	0			0	1	100
21	26	154	0			0	1	100
21	29	154	0			0	1	100
21	31	154	0			0	1	100
21	33	154	0			0	1	100
21	35	154	0			0	1	100
21	38	154	0			0	1	100
21	40	154	0			0	1	100
21		154	0			0	1	100

## Sheet: atf6 stats
% WT EV [59]						condition	chi	pvalue	corrected_pvalue
#days	dead	censored				WT EV v.s. fmo-4 OE EV	34.02	5.4e-09	2.7e-08
0						WT EV v.s. fmo4KO EV RNAi	0.08	0.7832	1
1	3					WT EV v.s. WT atf6 RNAi	55.73	0	0
5	13					WT EV v.s. fmo4OE atf6 RNAi	57.54	0	0
7	15					WT EV v.s. fmo4KO atf6 RNAi	0.57	0.4489	1
9	9					fmo-4 OE EV v.s. WT EV	34.02	5.4e-09	2.7e-08
12	15					fmo-4 OE EV v.s. fmo4KO EV RNAi	44	0	0
14	4					fmo-4 OE EV v.s. WT atf6 RNAi	0.39	0.534	1
16						fmo-4 OE EV v.s. fmo4OE atf6 RNAi	1.57	0.2099	1
19						fmo-4 OE EV v.s. fmo4KO atf6 RNAi	47.1	0	0
21						fmo4KO EV RNAi v.s. WT EV	0.08	0.7832	1
23						fmo4KO EV RNAi v.s. fmo-4 OE EV	44	0	0
25						fmo4KO EV RNAi v.s. WT atf6 RNAi	70.49	0	0
27						fmo4KO EV RNAi v.s. fmo4OE atf6 RNAi	72.3	0	0
						fmo4KO EV RNAi v.s. fmo4KO atf6 RNAi	0.36	0.5493	1
% fmo-4 OE EV [75]						WT atf6 RNAi v.s. WT EV	55.73	0	0
#days	dead	censored				WT atf6 RNAi v.s. fmo-4 OE EV	0.39	0.534	1
0						WT atf6 RNAi v.s. fmo4KO EV RNAi	70.49	0	0
1	0					WT atf6 RNAi v.s. fmo4OE atf6 RNAi	0.55	0.4566	1
5	11					WT atf6 RNAi v.s. fmo4KO atf6 RNAi	73.85	0	0
7	9					fmo4OE atf6 RNAi v.s. WT EV	57.54	0	0
9	7					fmo4OE atf6 RNAi v.s. fmo-4 OE EV	1.57	0.2099	1
12	9					fmo4OE atf6 RNAi v.s. fmo4KO EV RNAi	72.3	0	0
14	12					fmo4OE atf6 RNAi v.s. WT atf6 RNAi	0.55	0.4566	1
16	9					fmo4OE atf6 RNAi v.s. fmo4KO atf6 RNAi	74.36	0	0
19	14					fmo4KO atf6 RNAi v.s. WT EV	0.57	0.4489	1
21	4					fmo4KO atf6 RNAi v.s. fmo-4 OE EV	47.1	0	0
23						fmo4KO atf6 RNAi v.s. fmo4KO EV RNAi	0.36	0.5493	1
25						fmo4KO atf6 RNAi v.s. WT atf6 RNAi	73.85	0	0
27						fmo4KO atf6 RNAi v.s. fmo4OE atf6 RNAi	74.36	0	0
% fmo4KO EV RNAi [88]
#days	dead	censored
0
1	4
5	19
7	25
9	14
12	21
14	5
16
19
21
23
25
27
% WT atf6 RNAi [88]
#days	dead	censored
0
1	0
5	9
7	7
9	5
12	14
14	15
16	19
19	14
21	5
23
25
27
% fmo4OE atf6 RNAi [88]
#days	dead	censored
0
1	0
5	11
7	6
9	6
12	7
14	19
16	14
19	19
21	5
23	1
25
27
% fmo4KO atf6 RNAi [87]
#days	dead	censored
0
1	4
5	22
7	25
9	19
12	9
14	8
16
19
21
23
25
27

## Sheet: crt1 stats
% WT EV [59]						condition	chi	pvalue	corrected_pvalue
#days	dead	censored				WT EV v.s. fmo-4 OE EV	34.02	5.4e-09	2.7e-08
0						WT EV v.s. fmo4KO EV RNAi	0.08	0.7832	1
1	3					WT EV v.s. WT crt1 RNAi	34.43	4.4e-09	2.2e-08
5	13					WT EV v.s. fmo4OE crt1 RNAi	38.52	0	0
7	15					WT EV v.s. fmo4KO crt1 RNAi	24.1	9.1e-07	4.6e-06
9	9					fmo-4 OE EV v.s. WT EV	34.02	5.4e-09	2.7e-08
12	15					fmo-4 OE EV v.s. fmo4KO EV RNAi	44	0	0
14	4					fmo-4 OE EV v.s. WT crt1 RNAi	0.17	0.6785	1
16						fmo-4 OE EV v.s. fmo4OE crt1 RNAi	0.05	0.8298	1
19						fmo-4 OE EV v.s. fmo4KO crt1 RNAi	2.85	0.0916	0.458
21						fmo4KO EV RNAi v.s. WT EV	0.08	0.7832	1
23						fmo4KO EV RNAi v.s. fmo-4 OE EV	44	0	0
25						fmo4KO EV RNAi v.s. WT crt1 RNAi	43.99	0	0
27						fmo4KO EV RNAi v.s. fmo4OE crt1 RNAi	49.27	0	0
						fmo4KO EV RNAi v.s. fmo4KO crt1 RNAi	32.14	1.4e-08	7.2e-08
% fmo-4 OE EV [75]						WT crt1 RNAi v.s. WT EV	34.43	4.4e-09	2.2e-08
#days	dead	censored				WT crt1 RNAi v.s. fmo-4 OE EV	0.17	0.6785	1
0						WT crt1 RNAi v.s. fmo4KO EV RNAi	43.99	0	0
1	0					WT crt1 RNAi v.s. fmo4OE crt1 RNAi	0.42	0.5184	1
5	11					WT crt1 RNAi v.s. fmo4KO crt1 RNAi	1.48	0.2233	1
7	9					fmo4OE crt1 RNAi v.s. WT EV	38.52	0	0
9	7					fmo4OE crt1 RNAi v.s. fmo-4 OE EV	0.05	0.8298	1
12	9					fmo4OE crt1 RNAi v.s. fmo4KO EV RNAi	49.27	0	0
14	12					fmo4OE crt1 RNAi v.s. WT crt1 RNAi	0.42	0.5184	1
16	9					fmo4OE crt1 RNAi v.s. fmo4KO crt1 RNAi	3.34	0.0677	0.3383
19	14					fmo4KO crt1 RNAi v.s. WT EV	24.1	9.1e-07	4.6e-06
21	4					fmo4KO crt1 RNAi v.s. fmo-4 OE EV	2.85	0.0916	0.458
23						fmo4KO crt1 RNAi v.s. fmo4KO EV RNAi	32.14	1.4e-08	7.2e-08
25						fmo4KO crt1 RNAi v.s. WT crt1 RNAi	1.48	0.2233	1
27						fmo4KO crt1 RNAi v.s. fmo4OE crt1 RNAi	3.34	0.0677	0.3383
% fmo4KO EV RNAi [88]
#days	dead	censored
0
1	4
5	19
7	25
9	14
12	21
14	5
16
19
21
23
25
27
% WT crt1 RNAi [65]
#days	dead	censored
0
1	1
5	10
7	3
9	5
12	13
14	11
16	11
19	8
21	3
23
25
27
% fmo4OE crt1 RNAi [75]
#days	dead	censored
0
1	0
5	13
7	5
9	6
12	10
14	11
16	15
19	10
21	4
23	1
25
27
% fmo4KO crt1 RNAi [80]
#days	dead	censored
0
1	1
5	15
7	8
9	9
12	12
14	13
16	10
19	12
21
23
25
27

## Sheet: mcu1 stats
% WT EV [59]						condition	chi	pvalue	corrected_pvalue
#days	dead	censored				WT EV v.s. fmo-4 OE EV	34.02	5.4e-09	2.7e-08
0						WT EV v.s. fmo4KO EV RNAi	0.08	0.7832	1
1	3					WT EV v.s. WT mcu1 RNAi	1.19	0.2763	1
5	13					WT EV v.s. fmo4OE mcu1 RNAi	0.28	0.5978	1
7	15					WT EV v.s. fmo4KO mcu1 RNAi	7.13	0.0076	0.0379
9	9					fmo-4 OE EV v.s. WT EV	34.02	5.4e-09	2.7e-08
12	15					fmo-4 OE EV v.s. fmo4KO EV RNAi	44	0	0
14	4					fmo-4 OE EV v.s. WT mcu1 RNAi	40.48	0	0
16						fmo-4 OE EV v.s. fmo4OE mcu1 RNAi	43.3	0	0
19						fmo-4 OE EV v.s. fmo4KO mcu1 RNAi	61.31	0	0
21						fmo4KO EV RNAi v.s. WT EV	0.08	0.7832	1
23						fmo4KO EV RNAi v.s. fmo-4 OE EV	44	0	0
25						fmo4KO EV RNAi v.s. WT mcu1 RNAi	0.92	0.3373	1
27						fmo4KO EV RNAi v.s. fmo4OE mcu1 RNAi	0.09	0.7668	1
						fmo4KO EV RNAi v.s. fmo4KO mcu1 RNAi	7.46	0.0063	0.0316
% fmo-4 OE EV [75]						WT mcu1 RNAi v.s. WT EV	1.19	0.2763	1
#days	dead	censored				WT mcu1 RNAi v.s. fmo-4 OE EV	40.48	0	0
0						WT mcu1 RNAi v.s. fmo4KO EV RNAi	0.92	0.3373	1
1	0					WT mcu1 RNAi v.s. fmo4OE mcu1 RNAi	0.45	0.5005	1
5	11					WT mcu1 RNAi v.s. fmo4KO mcu1 RNAi	1.83	0.1767	0.8835
7	9					fmo4OE mcu1 RNAi v.s. WT EV	0.28	0.5978	1
9	7					fmo4OE mcu1 RNAi v.s. fmo-4 OE EV	43.3	0	0
12	9					fmo4OE mcu1 RNAi v.s. fmo4KO EV RNAi	0.09	0.7668	1
14	12					fmo4OE mcu1 RNAi v.s. WT mcu1 RNAi	0.45	0.5005	1
16	9					fmo4OE mcu1 RNAi v.s. fmo4KO mcu1 RNAi	5.45	0.0196	0.0981
19	14					fmo4KO mcu1 RNAi v.s. WT EV	7.13	0.0076	0.0379
21	4					fmo4KO mcu1 RNAi v.s. fmo-4 OE EV	61.31	0	0
23						fmo4KO mcu1 RNAi v.s. fmo4KO EV RNAi	7.46	0.0063	0.0316
25						fmo4KO mcu1 RNAi v.s. WT mcu1 RNAi	1.83	0.1767	0.8835
27						fmo4KO mcu1 RNAi v.s. fmo4OE mcu1 RNAi	5.45	0.0196	0.0981
% fmo4KO EV RNAi [88]
#days	dead	censored
0
1	4
5	19
7	25
9	14
12	21
14	5
16
19
21
23
25
27
% WT mcu1 RNAi [56]
#days	dead	censored
0
1	4
5	16
7	14
9	9
12	10
14	3
16
19
21
23
25
27
% fmo4OE mcu1 RNAi [78]
#days	dead	censored
0
1	3
5	21
7	19
9	13
12	18
14	4
16
19
21
23
25
27
% fmo4KO mcu1 RNAi [85]
#days	dead	censored
0
1	6
5	23
7	33
9	13
12	8
14	2
16
19
21
23
25
27

## Sheet: itr1 stats
% WT EV [59]						condition	chi	pvalue	corrected_pvalue
#days	dead	censored				WT EV v.s. fmo-4 OE EV	34.02	5.4e-09	2.7e-08
0						WT EV v.s. fmo4KO EV RNAi	0.08	0.7832	1
1	3					WT EV v.s. WT itr1 RNAi	5.07	0.0244	0.122
5	13					WT EV v.s. fmo4OE itr1 RNAi	0.17	0.6807	1
7	15					WT EV v.s. fmo4KO itr1 RNAi	16.5	4.9e-05	0.0002
9	9					fmo-4 OE EV v.s. WT EV	34.02	5.4e-09	2.7e-08
12	15					fmo-4 OE EV v.s. fmo4KO EV RNAi	44	0	0
14	4					fmo-4 OE EV v.s. WT itr1 RNAi	54.61	0	0
16						fmo-4 OE EV v.s. fmo4OE itr1 RNAi	46.76	0	0
19						fmo-4 OE EV v.s. fmo4KO itr1 RNAi	76.73	0	0
21						fmo4KO EV RNAi v.s. WT EV	0.08	0.7832	1
23						fmo4KO EV RNAi v.s. fmo-4 OE EV	44	0	0
25						fmo4KO EV RNAi v.s. WT itr1 RNAi	5.05	0.0247	0.1234
27						fmo4KO EV RNAi v.s. fmo4OE itr1 RNAi	0.03	0.8601	1
						fmo4KO EV RNAi v.s. fmo4KO itr1 RNAi	18.42	1.8e-05	0.0001
% fmo-4 OE EV [75]						WT itr1 RNAi v.s. WT EV	5.07	0.0244	0.122
#days	dead	censored				WT itr1 RNAi v.s. fmo-4 OE EV	54.61	0	0
0						WT itr1 RNAi v.s. fmo4KO EV RNAi	5.05	0.0247	0.1234
1	0					WT itr1 RNAi v.s. fmo4OE itr1 RNAi	4.12	0.0423	0.2113
5	11					WT itr1 RNAi v.s. fmo4KO itr1 RNAi	3.05	0.0807	0.4036
7	9					fmo4OE itr1 RNAi v.s. WT EV	0.17	0.6807	1
9	7					fmo4OE itr1 RNAi v.s. fmo-4 OE EV	46.76	0	0
12	9					fmo4OE itr1 RNAi v.s. fmo4KO EV RNAi	0.03	0.8601	1
14	12					fmo4OE itr1 RNAi v.s. WT itr1 RNAi	4.12	0.0423	0.2113
16	9					fmo4OE itr1 RNAi v.s. fmo4KO itr1 RNAi	15.84	0.0001	0.0003
19	14					fmo4KO itr1 RNAi v.s. WT EV	16.5	4.9e-05	0.0002
21	4					fmo4KO itr1 RNAi v.s. fmo-4 OE EV	76.73	0	0
23						fmo4KO itr1 RNAi v.s. fmo4KO EV RNAi	18.42	1.8e-05	0.0001
25						fmo4KO itr1 RNAi v.s. WT itr1 RNAi	3.05	0.0807	0.4036
27						fmo4KO itr1 RNAi v.s. fmo4OE itr1 RNAi	15.84	0.0001	0.0003
% fmo4KO EV RNAi [88]
#days	dead	censored
0
1	4
5	19
7	25
9	14
12	21
14	5
16
19
21
23
25
27
% WT itr1 RNAi [73]
#days	dead	censored
0
1	3
5	23
7	24
9	13
12	8
14	2
16
19
21
23
25
27
% fmo4OE itr1 RNAi [94]
#days	dead	censored
0
1	2
5	24
7	29
9	14
12	18
14	7
16
19
21
23
25
27
% fmo4KO itr1 RNAi [102]
#days	dead	censored
0
1	5
5	28
7	54
9	11
12	3
14	1
16
19
21
23
25
27

## Sheet: Sheet1
#1	N2								#1	N2					#1	N2
#2	Lei42	fmo-2p::MC; unc-119p::HIF-1(P621A); JT307 #1							#2	Lei42	fmo-2p::MC; unc-119p::HIF-1(P621A); JT307 #1				#11L	Lei51	fmo-2p::MC; JT307; gcy-31; gcy-36 - XA2262 sibling #1
#3	Lei43	fmo-2p::MC; unc-119p::HIF-1(P621A); JT307 #2							#3	Lei43	fmo-2p::MC; unc-119p::HIF-1(P621A); JT307 #2				#12L	Lei52	fmo-2p::MC; JT307; gcy-33; gcy-36 - XA2262 sibling #1
#4	Lei44	fmo-2p::MC; TU3311; CB5602 #1							#4	Lei44	fmo-2p::MC; TU3311; CB5602 #1				#13	Lei53	fmo-2p::MC; JT307; gcy-33; gcy-36 - XA2262 sibling #2
#5	Lei45	fmo-2p::MC; TU3311 #1							#5	Lei45	fmo-2p::MC; TU3311 #1				#14L	Lei55	fmo-2p::MC; JT307 - XA2262 sibling #1
#6	Lei46	fmo-2p::MC; CB5602 #1							#6	Lei46	fmo-2p::MC; CB5602 #1				#15L	Lei56	fmo-2p::MC; JT307 - XA2262 sibling #2
#7	Lei47	fmo-2p::MC; TU3311; CB5602 #2							#7	Lei47	fmo-2p::MC; TU3311; CB5602 #2				#16	Lei57	fmo-2p::MC - XA2262 sibling #1
#8L	Lei48	fmo-2p::MC; JT307; XA2262 #1													#17	Lei58	fmo-2p::MC - XA2262 sibling #2
#9	Lei49	fmo-2p::MC; JT307; XA2262 #2													#18	Lei59	fmo-2p::MC; gcy-33; gcy-36 - XA2262 sibling #1
#10L	Lei50	fmo-2p::MC; JT307; XA2262 #3							#1	N2					#19	Lei60	fmo-2p::MC; gcy-33; gcy-36 - XA2262 sibling #2
#11L	Lei51	fmo-2p::MC; JT307; gcy-31; gcy-36 - XA2262 sibling #1							#8L	Lei48	fmo-2p::MC; JT307; XA2262 #1
#12L	Lei52	fmo-2p::MC; JT307; gcy-33; gcy-36 - XA2262 sibling #1							#9	Lei49	fmo-2p::MC; JT307; XA2262 #2
#13	Lei53	fmo-2p::MC; JT307; gcy-33; gcy-36 - XA2262 sibling #2							#10L	Lei50	fmo-2p::MC; JT307; XA2262 #3
#14L	Lei55	fmo-2p::MC; JT307 - XA2262 sibling #1							#14L	Lei55	fmo-2p::MC; JT307 - XA2262 sibling #1
#15L	Lei56	fmo-2p::MC; JT307 - XA2262 sibling #2							#15L	Lei56	fmo-2p::MC; JT307 - XA2262 sibling #2
#16	Lei57	fmo-2p::MC - XA2262 sibling #1							#16	Lei57	fmo-2p::MC - XA2262 sibling #1
#17	Lei58	fmo-2p::MC - XA2262 sibling #2							#17	Lei58	fmo-2p::MC - XA2262 sibling #2
#18	Lei59	fmo-2p::MC; gcy-33; gcy-36 - XA2262 sibling #1							#20	Lei61	fmo-2p::MC; XA2262 #1
#19	Lei60	fmo-2p::MC; gcy-33; gcy-36 - XA2262 sibling #2							#21	Lei62	fmo-2p::MC; XA2262 #2
#20	Lei61	fmo-2p::MC; XA2262 #1
#21	Lei62	fmo-2p::MC; XA2262 #2
