# Supplementary material for: fmo-4 promotes longevity and stress resistance via ER to mitochondria calcium regulation in C. elegans
Source: eLife journal article supplement (doi:10.7554/elife.99971), 2024-08-27
Supplement: fig7-figsupp1-data1 [file elife-99971-fig7-figsupp1-data1-v1.zip]

## Sheet: 01AUG
	4mcherry ev						atf4						ire1						xbp1						pek1
	1	107354	800.304	315	3247		1	77010.7	852.007	356	3927		1	107962	826.502	262	2502		1	89920.3	851.282	341	2555		1	106143	706.583	270	2193
	2	94696.5	808.828	271	2093		2	103888	808.215	308	2523		2	89901.4	751.68	255	1899		2	97273.4	860.336	323	3477		2	105728	724.558	286	3284
	3	105061	799.313	345	3281		3	106069	826.139	314	3846		3	95980.2	983.695	327	3397		3	82246.3	789.886	325	3081		3	99189.5	696.048	327	2374
	4	112266	828.509	350	3816		4	76790.5	842.186	224	3846		4	82463.4	907.298	278	2264		4	88366	844.635	344	4871		4	110255	754.226	357	1999
	5	71621	942.841	423	4166		5	65448.8	718.37	274	2310		5	89438.9	876.089	325	2412		5	74188.4	849.74	446	4871		5	99799.9	759.088	294	3316
	6	89212.4	887.527	307	5085		6	92482.5	658.089	263	1632		6	108355	805.599	331	2215		6	84426.7	821.168	426	3071		6	99296.5	737.262	287	2178
	7	89460.9	934.861	292	3975		7	102743	798.723	275	3309		7	71224.5	834.292	383	2601		7	89885.7	839.222	345	3582		7	96389.3	647.693	250	1945
	8	82381.6	878.998	346	3936		8	102596	758.675	292	3463		8	81217.4	855.258	427	1808		8	80128.8	823.961	313	4861		8	66593.1	996.738	348	3255
	9	94705.9	971.329	482	4107		9	91727.4	664.261	324	1533		9	94784.6	914.047	341	2140		9	114896	856.49	343	2645		9	79351.6	851.855	345	3795
	10	81657.9	950.819	368	3487		10	87493.4	838.962	282	3309		10	94451.1	789.448	314	3895		10	99060.5	801.136	317	3330		10	90773	822.173	333	3342
	11	82627	909.484	299	3826		11	87920.3	787.255	356	2513		11	82249.4	906.422	311	3024		11	102326	786.057	299	5260		11	113861	824.007	321	2966
	12	83583.5	1016.88	405	3943		12	88172	866.309	346	3122		12	78152.9	919.841	359	2007		12	101593	871.553	355	3182		12	89536.4	851.243	456	3484
	13	85792.3	921.781	355	3447		13	85715.7	805.196	377	2899		13	91609.9	950.063	335	3602		13	116649	769.334	297	3182		13	110454	796.389	368	2542
	14	96118.7	895.011	314	4447		14	81322.3	839.367	372	2600		14	98878	874.855	307	3074		14	71482.5	905.8	451	4197		14	98616.9	843.611	318	4534
	15	84011.4	804.735	241	2147		15	94604.2	759.644	373	2628		15	91934	677.233	293	2480		15	92840.1	844.023	340	3961		15	100958	828.49	337	3348
	16	97940.4	877.13	261	4075		16	103695	788.431	379	2266		16	96071.5	768.558	384	2480		16	101254	870.646	319	3426		16	94186.8	789.092	285	4038
	17	85754.5	780.503	254	2057		17	75024.3	849.296	419	4080		17	82859.8	811.176	408	3663		17	93475.7	825.309	300	3890		17	91679.1	753.111	299	1940
	18	96213.1	766.01	230	2690		18	80831.5	812.922	322	2487		18	93903.6	864.354	326	3663		18	85446.2	777.903	315	3008		18	93500.9	733.566	278	3169
	19	91317.3	738.426	219	3014		19	61310.3	326.497	226	518		19	78297.6	876.092	378	3208		19	94520.3	705.709	272	2440		19	106763	818.958	305	2894
	20	95583.8	776.527	268	3059								20	93551.2	979.27	475	4058		20	88762.4	838.928	360	3317		20	95061.5	811.535	321	2966
	21	85147.2	709.689	281	2452								21	84187.6	401.803	302	1226		21	59041.8	383.027	288	569		21	43605.6	393.372	300	782
	22	91034.1	414.45	258	785

## Sheet: 01aug analysis
EV	Fluoresence Intentsity	BGC	Mean	Standard Dev		atf4	BGC	Mean	Standard Dev				ire1	Fluoresence Intentsity	BGC	Mean	Standard Dev		xbp1	BGC	Mean	Standard Dev		pek1	Fluoresence Intentsity	BGC	Mean	Standard Dev
1	800.304	385.854	442.669	192.595		852.007	525.51	466.506	61.0227				1	826.502	424.699	456.786	74.3652		851.282	468.255	443.629	46.0283		1	706.583	313.211	393.939	75.3747
2	808.828	394.378	442.669			808.215	481.718						2	751.68	349.877				860.336	477.309				2	724.558	331.186
3	799.313	384.863				826.139	499.642						3	983.695	581.892				789.886	406.859				3	696.048	302.676
4	828.509	414.059				842.186	515.689						4	907.298	505.495				844.635	461.608				4	754.226	360.854
5	942.841	528.391				718.37	391.873						5	876.089	474.286				849.74	466.713				5	759.088	365.716
6	887.527	473.077				658.089	331.592						6	805.599	403.796				821.168	438.141				6	737.262	343.89
7	934.861	520.411				798.723	472.226						7	834.292	432.489				839.222	456.195					647.693	254.321
8	878.998	464.548				758.675	432.178						8	855.258	453.455				823.961	440.934					996.738	603.366
9	971.329	556.879				664.261	337.764						9	914.047	512.244				856.49	473.463					851.855	458.483
	950.819	536.369				838.962	512.465						10	789.448	387.645				801.136	418.109					822.173	428.801
	909.484	495.034				787.255	460.758						11	906.422	504.619				786.057	403.03					824.007	430.635
	1016.88	602.428				866.309	539.812						12	919.841	518.038				871.553	488.526					851.243	457.871
	921.781	507.331				805.196	478.699						13	950.063	548.26				769.334	386.307					796.389	403.017
	895.011	480.561				839.367	512.87						14	874.855	473.052				905.8	522.773					843.611	450.239
	804.735	390.285				759.644	433.147						15	677.233	275.43				844.023	460.996					828.49	435.118
	877.13	462.68				788.431	461.934						16	768.558	366.755				870.646	487.619					789.092	395.72
	780.503	366.053				849.296	522.799						17	811.176	409.373				825.309	442.282					753.111	359.739
	766.01	351.56				812.922	486.425						18	864.354	462.551				777.903	394.876					733.566	340.194
	738.426	323.976				326.497							20	876.092	474.289				705.709	322.682					818.958	425.586
	776.527	362.077												979.27	577.467				838.928	455.901					811.535	418.163
	709.689	295.239												401.803					383.027						393.372
	414.45
	EV	atf4	ire	xbp	pek														gfp Induction	0.950962				gfp Induction	0.889918
	0.871653	1.18714	0.959405	1.0578	0.707551
	0.890909	1.08821	0.79038	1.07825	0.748157
	0.869414	1.1287	1.31451	0.919104	0.683752
	0.935369	1.16495	1.14192	1.04278	0.815178
	1.19365	0.88525	1.07142	1.05432	0.826161
	1.06869	0.749074	0.912185	0.989771	0.776856
	1.17562	1.06677	0.977003	1.03056	0.574517
	1.04942	0.9763	1.02437	0.99608	1.36302
	1.258	0.763017	1.15717	1.06956	1.03572
	1.21167	1.15767	0.875699	0.944518	0.968671
	1.11829	1.04086	1.13995	0.910454	0.972814
	1.3609	1.21945	1.17026	1.10359	1.03434
	1.14607	1.08139	1.23853	0.872677	0.910425
	1.0856	1.15859	1.06864	1.18096	1.0171
	0.881663	0.978489	0.622203	1.0414	0.982942
	1.0452	1.04352	0.828508	1.10154	0.893941
	0.826922	1.18102	0.924783	0.999125	0.812659
	0.794182	1.09885	1.04491	0.892034	0.768506
	0.731869		1.07143	0.728946	0.961409
	0.81794		1.30451	1.02989	0.94464
	0.666952

## Sheet: 27JUL
	EV						atf4						ire1						xbp1						pek1
	1	72455	641.951	355	2299		1	91792.4	806.903	370	2366		1	77128.7	697.091	340	1979		1	73146.8	793.012	385	1927		1	67111.9	691.061	329	1707
	2	92217.2	791.277	336	1691		2	63286.2	921.217	530	1909		2	97640.7	695.05	342	2381		2	81080.9	813.718	347	1897		2	94699.8	816.533	327	2155
	3	81606.8	983.551	418	2352		3	84068	816.64	396	2792		3	82997.8	695.807	321	2103		3	92613	845.271	310	4006		3	74814.3	775.706	346	2684
	4	59686.6	743.778	356	1954		4	72240.8	824.288	493	2486		4	66177	747.853	311	1650		4	69329.9	823.183	304	3464		4	73895.6	854.433	308	1857
	5	80942.1	773.894	382	2005		5	67486.6	825.233	420	2288		5	63012.1	799.543	404	2544		5	63488.8	861.448	381	2853		5	68198.3	894.165	483	2651
	6	89794.6	853.879	426	2234		6	85191.3	837.231	407	2525		6	76280.5	807.756	454	2744		6	70756.5	837.88	428	2232		6	64499.7	907.737	387	2060
	7	74550	772.543	425	1392		7	86726.7	937.938	472	2185		7	64563.2	850.502	359	2744		7	57175.2	960.093	438	2474		7	85453.8	847.261	443	1807
	8	78708.5	951.533	412	2340		8	53516.7	868.672	421	1621		8	76426.8	811.424	420	2174		8	92318.9	915.879	442	2826		8	71983.3	857.997	492	2646
	9	84508.3	968.4	421	3211		9	51490.5	896.105	415	1892		9	70836.5	843.98	397	2004		9	63804.8	827.606	323	2537		9	66046.4	959.742	410	2577
	10	63397.7	937.314	422	2486		10	64079.1	824.992	370	1716		10	75740.5	814.879	409	2004		10	87335	752.738	301	2537		10	91137.6	826.527	508	2163
	11	69670.1	964.047	400	2514		11	68471.5	857.334	365	1834		11	69388.9	729.361	380	1950		11	89378	718.089	330	2117		11	74901.8	921.461	511	2007
	12	79325.9	899.461	419	2390		12	73272.8	758.607	302	1513		12	61755.6	783.813	413	1950		12	89074.5	899.136	411	2724		12	81921.9	839.196	508	2402
	13	62071.4	883.241	488	2239		13	57286.1	767.742	425	2659		13	61188.4	687.052	361	1319		13	74320	814.081	363	2232		13	74142.5	909.638	407	1884
	14	67058.5	770.729	392	1983		14	79441.8	767.423	450	2010		14	71792.3	819.453	416	1739		14	46953.1	620.324	359	1798		14	66037	920.654	453	2220
	15	74950.1	877.573	491	2252		15	75330.6	854.451	487	2486		15	73243.1	870.999	458	2118		15	52200.8	615.771	401	1145		15	91746.9	915.384	372	1961
	16	67036.4	935.518	473	2549		16	83499.6	921.05	428	1776		16	69200.8	819.619	458	3405		16	60438.4	714.129	385	1562		16	57509.8	783.397	377	2852
	17	70545.9	826.828	429	2549		17	68273.2	944.425	488	1828		17	91423.8	807.217	370	2031		17	59853.3	743.09	378	1912		17	63056.1	901.243	386	3833
	18	67477.5	738.397	392	2126		18	63748.7	998.497	613	2707		18	70363.4	753.633	399	2635		18	82491.9	694.35	431	2829		18	76236	875.477	415	2155
	19	57270.3	697.479	355	1628		19	74106.6	826.423	413	2196		19	61727.4	626.425	323	1130		19	84719.5	724.176	390	3856		19	67621.3	693.358	313	1707
	20	49693.7	731.748	371	1921		20	66272.1	839.878	479	2545		20	79251.1	711.496	327	1791		20	70606.3	884.273	408	2209		20	150691	405.226	280	1444
	21	87082.1	825.541	381	2443		21	95048.9	383.281	268	587		21	57155.6	287.998	193	450		21	74047.8	320.608	205	499		21	83329	331.385	220	520
	22	73756.1	898.441	436	1713
	23	62093.5	323.702	220	543

## Sheet: 27jul analysis
EV	Fluoresence Intentsity	BGC	Mean	Standard Dev		atf4	BGC	Mean	Standard Dev				ire1	Fluoresence Intentsity	BGC	Mean	Standard Dev		xbp1	BGC	Mean	Standard Dev		pek1	Fluoresence Intentsity	BGC	Mean	Standard Dev
1	641.951	318.249	515.713	221.973		806.903	423.622	471.471	64.2963				1	697.091	409.093	480.65	67.0639		793.012	472.404	472.304	93.655		1	691.061	359.676	498.425	123.509
2	791.277	467.575	515.713			921.217	537.936						2	695.05	407.052				813.718	493.11				2	816.533	485.148
3	983.551	659.849				816.64	433.359						3	695.807	407.809				845.271	524.663				3	775.706	444.321
4	743.778	420.076				824.288	441.007						4	747.853	459.855				823.183	502.575				4	854.433	523.048
5	773.894	450.192				825.233	441.952						5	799.543	511.545				861.448	540.84				5	894.165	562.78
6	853.879	530.177				837.231	453.95						6	807.756	519.758				837.88	517.272				6	907.737	576.352
7	772.543	448.841				937.938	554.657						7	850.502	562.504				960.093	639.485					847.261	515.876
8	951.533	627.831				868.672	485.391						8	811.424	523.426				915.879	595.271					857.997	526.612
9	968.4	644.698				896.105	512.824						9	843.98	555.982				827.606	506.998					959.742	628.357
	937.314	613.612				824.992	441.711						10	814.879	526.881				752.738	432.13					826.527	495.142
	964.047	640.345				857.334	474.053						11	729.361	441.363				718.089	397.481					921.461	590.076
	899.461	575.759				758.607	375.326						12	783.813	495.815				899.136	578.528					839.196	507.811
	883.241	559.539				767.742	384.461						13	687.052	399.054				814.081	493.473					909.638	578.253
	770.729	447.027				767.423	384.142						14	819.453	531.455				620.324	299.716					920.654	589.269
	877.573	553.871				854.451	471.17						15	870.999	583.001				615.771	295.163					915.384	583.999
	935.518	611.816				921.05	537.769						16	819.619	531.621				714.129	393.521					783.397	452.012
	826.828	503.126				944.425	561.144						17	807.217	519.219				743.09	422.482					901.243	569.858
	738.397	414.695				998.497	615.216						18	753.633	465.635				694.35	373.742					875.477	544.092
	697.479	373.777				826.423	443.142						20	626.425	338.427				724.176	403.568					693.358	361.973
	731.748	408.046				839.878	456.597							711.496	423.498				884.273	563.665					405.226	73.841
	825.541	501.839				383.281								287.998					320.608						331.385
	898.441	574.739
	323.702
	EV	atf4	ire1	xbp	pek														gfp Induction	1.00177				gfp Induction	0.966478
	0.617105	0.82143	0.793258	0.916022	0.697435
	0.906658	1.04309	0.7893	0.956172	0.940733
	1.27949	0.840311	0.790768	1.01736	0.861567
	0.814554	0.855141	0.891688	0.974525	1.01422
	0.872951	0.856973	0.991919	1.04872	1.09127
	1.02805	0.880238	1.00784	1.00302	1.11758
	0.870332	1.07552	1.09073	1.24	1.00032
	1.2174	0.941204	1.01496	1.15427	1.02113
	1.25011	0.994399	1.07808	0.983102	1.21842
	1.18983	0.856506	1.02166	0.837928	0.960112
	1.24167	0.919219	0.855831	0.770741	1.1442
	1.11643	0.727781	0.961417	1.1218	0.984678
	1.08498	0.745495	0.773791	0.956876	1.12127
	0.866814	0.744876	1.03053	0.581169	1.14263
	1.07399	0.913629	1.13048	0.57234	1.13241
	1.18635	1.04277	1.03085	0.763062	0.87648
	0.975594	1.08809	1.0068	0.81922	1.10499
	0.80412	1.19294	0.902896	0.72471	1.05503
	0.724778	0.859281	0.656232	0.782544	0.701889
	0.791227	0.885371	0.82119	1.09298	0.143182
	0.973098
	1.11446
	0
	0
	0
	0
	0
	0

## Sheet: 24JUL
	EV						atf4						ire1						xbp1						pek1
	1	65976	626.852	285	1899		1	75383.7	679.01	337	1513		1	59371.5	787.253	346	2039		1	65140.7	725.966	273	2223		1	54882	695.057	318	1787
	2	70765.9	686.589	373	2104		2	64665.1	623.014	327	1088		2	35312.6	856.039	374	1538		2	68660.4	730.23	371	1878		2	54747.5	584.28	231	1483
	3	78018	644.758	273	2104		3	74201.1	636.212	309	1297		3	42132.9	753.583	375	1268		3	72905.9	706.334	286	2279		3	68835.6	659.094	274	1436
	4	75508.9	671.331	297	2101		4	64505.6	688.711	367	1520		4	30275.5	922.465	353	2526		4	74076	856.492	335	2893		4	50530.1	680.102	274	1593
	5	75239.8	580.733	297	1315		5	75718.5	656.348	380	1426		5	55679.8	723.78	334	1796		5	69461.3	822.717	295	3048		5	61777.4	592.31	304	1089
	6	74620.3	661.9	303	2128		6	72446	651.131	332	1373		6	55216.7	771.458	462	1485		6	75834.2	868.103	303	2254		6	63038.3	564.902	334	1446
	7	57075.1	800.041	413	1710		7	65847.7	633.672	314	1794		7	42927.6	735.558	315	1475		7	67005.3	725.731	349	2105		7	75255.5	583.327	245	1446
	8	57485	631.728	311	1577		8	70650.1	562.611	317	1167		8	54922.7	713.619	359	1247		8	63210.3	732.926	456	1538		8	67067.9	529.817	299	1254
	9	81468.9	637.457	312	2209		9	58185.8	554.477	299	1176		9	61617.9	766.324	445	1652		9	52788.9	748.399	466	1496		9	74542.1	553.907	316	1284
	10	75449.4	596.084	290	2209		10	83305.4	617.256	310	1519		10	58401.7	740.284	334	1563		10	65732	726.228	428	2748		10	79641.8	647.682	355	1574
	11	59637.5	757.394	405	1858		11	53139.3	697.841	303	1550		11	45167.7	761.628	351	1469		11	69630.2	796.651	405	1926		11	74479.6	712.001	433	1472
	12	59718.8	678.167	241	1498		12	59409.1	639.905	397	1578		12	50796	779.195	480	1515		12	59055.5	836.099	479	1991		12	57072	791.681	378	1429
	13	66414	716.878	301	2533		13	73112.4	615.981	305	1394		13	59502.9	719.729	355	1316		13	59991	795.568	461	1798		13	63263.5	602.409	319	1229
	14	69029.5	695.808	366	1618		14	63717.2	578.844	309	1511		14	43634.6	759.07	418	1652		14	73303.2	723.497	380	2218		14	62875.6	591.118	379	1260
	15	69821.1	713.998	358	2128		15	72965.3	611.668	296	1887		15	63848.6	738.987	378	1360		15	69417.5	747.684	332	2164		15	67380.8	608.943	357	1260
	16	55545.2	611.699	295	2183		16	70618.9	661.406	403	1274		16	74711.1	771.154	431	1739		16	54778.7	699.641	391	2888		16	70587.6	617.249	343	1165
	17	54469	634.797	319	1841		17	61749.3	584.079	314	1123		17	85451.6	742.014	378	1734		17	61921.3	706.101	346	2888		17	71169.5	693.847	340	1202
	18	52929.7	671.904	367	1816		18	63889.2	696.143	364	1426		18	66523.5	821.632	373	2202		18	72930.9	701.641	325	1826		18	62378.1	542.995	219	1430
	19	64608.8	687.865	357	1432		19	65003	656.628	279	1426		19	57563.2	747.635	452	1190		19	78956.6	745.091	404	2106		19	84153.2	644.904	392	1253
	20	53020.5	364.598	264	590		20	92124.9	605.868	310	1519		20	58605	756.189	342	1796		20	57291	856.39	326	2306		20	101020	661.141	293	1261
							21	97521.7	305.334	199	1002		21	81181	468.699	362	658		21	132077	491.724	366	1036		21	81062.1	334.437	227	495

## Sheet: 24jul analysis
EV	Fluoresence Intentsity	BGC	Mean	Standard Dev		atf4	BGC	Mean	Standard Dev				ire1	Fluoresence Intentsity	BGC	Mean	Standard Dev		xbp1	BGC	Mean	Standard Dev		pek1	Fluoresence Intentsity	BGC	Mean	Standard Dev
1	626.852	262.254	304.138	134.57		679.01	373.676	327.206	42.2899				1	787.253	318.554	299.681	50.7231		725.966	234.242	270.85	54.2583		1	695.057	360.62	293.401	65.7524
2	686.589	321.991	304.138			623.014	317.68						2	856.039	387.34				730.23	238.506				2	584.28	249.843
3	644.758	280.16				636.212	330.878						3	753.583	284.884				706.334	214.61				3	659.094	324.657
4	671.331	306.733				688.711	383.377						4	922.465	453.766				856.492	364.768				4	680.102	345.665
5	580.733	216.135				656.348	351.014						5	723.78	255.081				822.717	330.993				5	592.31	257.873
6	661.9	297.302				651.131	345.797						6	771.458	302.759				868.103	376.379				6	564.902	230.465
7	800.041	435.443				633.672	328.338						7	735.558	266.859				725.731	234.007					583.327	248.89
8	631.728	267.13				562.611	257.277						8	713.619	244.92				732.926	241.202					529.817	195.38
9	637.457	272.859				554.477	249.143						9	766.324	297.625				748.399	256.675					553.907	219.47
	596.084	231.486				617.256	311.922						10	740.284	271.585				726.228	234.504					647.682	313.245
	757.394	392.796				697.841	392.507						11	761.628	292.929				796.651	304.927					712.001	377.564
	678.167	313.569				639.905	334.571						12	779.195	310.496				836.099	344.375					791.681	457.244
	716.878	352.28				615.981	310.647						13	719.729	251.03				795.568	303.844					602.409	267.972
	695.808	331.21				578.844	273.51						14	759.07	290.371				723.497	231.773					591.118	256.681
	713.998	349.4				611.668	306.334						15	738.987	270.288				747.684	255.96					608.943	274.506
	611.699	247.101				661.406	356.072						16	771.154	302.455				699.641	207.917					617.249	282.812
	634.797	270.199				584.079	278.745						17	742.014	273.315				706.101	214.377					693.847	359.41
	671.904	307.306				696.143	390.809						18	821.632	352.933				701.641	209.917					542.995	208.558
	687.865	323.267				656.628	351.294						20	747.635	278.936				745.091	253.367					644.904	310.467
	364.598					605.868	300.534							756.189	287.49				856.39	364.666					661.141	326.704
						305.334								468.699					491.724						334.437
	ev	atf4	ire	xbp1	pek1														gfp Induction	0.827767				gfp Induction	0.964698
	0.862286	1.22864	1.0474	0.770183	1.18571
	1.0587	1.04453	1.27357	0.784203	0.821479
	0.921161	1.08792	0.936693	0.705634	1.06747
	1.00853	1.26054	1.49197	1.19935	1.13654
	0.710648	1.15413	0.838702	1.0883	0.847882
	0.977524	1.13697	0.995466	1.23753	0.757765
	1.43173	1.07957	0.877428	0.769411	0.818346
	0.878319	0.845922	0.805292	0.793068	0.642406
	0.897155	0.819178	0.978586	0.843943	0.721613
	0.761122	1.02559	0.892967	0.771045	1.02994
	1.29151	1.29056	0.963145	1.00259	1.24142
	1.03101	1.10006	1.02091	1.1323	1.50341
	1.15829	1.0214	0.825382	0.999034	0.881087
	1.08901	0.899296	0.954735	0.762065	0.843962
	1.14882	1.00722	0.888702	0.841592	0.902571
	0.812464	1.17076	0.994466	0.683627	0.929881
	0.888409	0.916508	0.898655	0.704868	1.18173
	1.01042	1.28497	1.16044	0.690203	0.685735
	1.0629	1.15505	0.917136	0.833066	1.02081
		0.98815	0.945262	1.19902	1.0742
