# Supplementary material for: fmo-4 promotes longevity and stress resistance via ER to mitochondria calcium regulation in C. elegans
Source: eLife. 2025 Feb 14;13:RP99971. doi: 10.7554/eLife.99971 (PMC11828484; doi:10.7554/eLife.99971)
Supplement: Source data 2. [file elife-99971-data2.xlsx]

## Sheet: FMO-4 OE sig transcripts
fmo-4 OE	padj
B0213.14	8.04032e-15
B0213.15	4.86449e-14
T10D4.6	4.38688e-12
C25D7.3	5.13327e-12
K07C6.5	4.07143e-11
T09H2.1	5.82259e-11
B0205.13	2.80725e-10
D2030.7	5.06567e-09
C18D4.6	9.91767e-09
B0213.16	2.97716e-07
W06A11.4	1.29709e-06
H19N07.3	3.15301e-05
ZC204.14	6.28662e-05
B0213.10	0.000117317
F57F4.3	0.000337897
Y63D3A.3	0.000582761
C39H7.1	0.000582761
F58G6.9	0.000938254
T05E11.9	0.00116193
K07F5.1	0.00128976
C04C3.5	0.00135737
ZK1251.6	0.0022248
F31E9.6	0.00245386
F46F3.1	0.00270458
F25D1.5	0.00270458
F32B6.6	0.00270458
F44D12.5	0.00532227
C03A7.14	0.00760481
Y47D3B.6	0.00804357
ZK938.1	0.00886685
F32H2.7	0.00888763
R03H10.2	0.00973899
K01H12.4	0.0107324
ZK354.11	0.0108991
T24A6.17	0.0108991
H04M03.4	0.0115791
F08C6.4	0.0115791
Y41C4A.11	0.0116192
Y20C6A.2	0.0116192
C03G6.15	0.011808
C09B9.6	0.0124853
C49A1.4	0.0137506
T10E9.4	0.016959
F36D3.4	0.0170912
F29C12.1	0.0173011
C08F1.10	0.0176626
SSSD1.1	0.0184727
T24B8.6	0.0184727
M02B1.4	0.0185163
T03G6.1	0.0188448
T14B4.6	0.0193619
T03D3.5	0.0212237
C04F12.7	0.0212237
C40A11.2	0.022695
F17E9.5	0.022695
T13F2.10	0.022695
ZK938.2	0.0239711
C04G2.4	0.0248929
D1044.2	0.0257862
C06B3.3	0.0257862
F49C12.15	0.0257862
Y54G2A.13	0.0257862
K08F8.2	0.0272559
T02G5.11	0.0272559
F27C1.1	0.0272559
K03H1.1	0.0272559
M28.9	0.0272559
Y82E9BR.17	0.027307
B0025.5	0.0275941
ZC477.1	0.0279853
F46E10.2	0.0280983
T14G12.4	0.0285576
Y105C5B.13	0.0285576
Y71H2AM.15	0.0286845
Y73B6BL.12	0.0286845
C35D10.2	0.0286845
C33F10.9	0.0286845
C04G2.9	0.0286845
F44D12.4	0.0296614
Y69E1A.1	0.0299523
F49E12.6	0.0318177
Y106G6D.3	0.0318177
R05F9.13	0.0318177
C03C10.5	0.0319372
K04H4.5	0.0319372
ZK354.1	0.0319372
T21G5.1	0.0323069
W09C3.6	0.0332914
R13H9.1	0.0372404
Y59E9AL.2	0.0372404
T14F9.5	0.0373135
T21G5.4	0.0384058
C30G12.2	0.0386812
K01D12.1	0.0386974
F25E5.1	0.038808
F08A8.2	0.038808
T04F3.3	0.038808
F47C12.1	0.039147
C01G6.1	0.039147
T24B8.3	0.039147
C06E7.4	0.039147
F48E3.6	0.039147
R13H9.4	0.0395978
R09E10.6	0.0396702
ZK909.4	0.0401046
ZC132.4	0.0401046
M05B5.1	0.0401046
Y106G6H.13	0.0415773
T05F1.5	0.0426753
F22F4.1	0.0430944
C25H3.10	0.0430944
ZK945.7	0.0430944
C48B6.4	0.0430944
R07E5.6	0.0430944
C28A5.4	0.0432277
F58B3.9	0.0432277
T10B10.3	0.0432277
C10G11.8	0.0432277
F41H10.2	0.0432277
T14B4.7	0.0496037
Y53C12C.1	0.0496411
M163.3	0.0496411
F57F4.1	0.0496411
C34F11.4	0.0496411
R05F9.8	0.0497814

## Sheet: PANTHER pathway analysis
1	Apoptosis signaling pathway (P00006)	1	0.011	0.032
2	Interleukin signaling pathway (P00036)	1	0.011	0.032
3	Alzheimer disease-amyloid secretase pathway (P00003)	1	0.011	0.032
4	Insulin/IGF pathway-protein kinase B signaling cascade (P00033)	1	0.011	0.032
5	Inflammation mediated by chemokine and cytokine signaling pathway (P00031)	1	0.011	0.032
6	p53 pathway feedback loops 2 (P04398)	1	0.011	0.032
7	Endothelin signaling pathway (P00019)	1	0.011	0.032
8	Parkinson disease (P00049)	5	0.056	0.161
9	Gonadotropin-releasing hormone receptor pathway (P06664)	1	0.011	0.032
10	PI3 kinase pathway (P00048)	1	0.011	0.032
11	Cytoskeletal regulation by Rho GTPase (P00016)	1	0.011	0.032
12	PDGF signaling pathway (P00047)	1	0.011	0.032
13	Ras Pathway (P04393)	1	0.011	0.032
14	Cell cycle (P00013)	1	0.011	0.032
15	CCKR signaling map (P06959)	2	0.022	0.065
16	p53 pathway (P00059)	1	0.011	0.032
17	Wnt signaling pathway (P00057)	4	0.045	0.129
18	Heterotrimeric G-protein signaling pathway-Gi alpha and Gs alpha mediated pathway (P00026)	1	0.011	0.032
19	Hedgehog signaling pathway (P00025)	4	0.045	0.129
20	GABA-B receptor II signaling (P05731)	1	0.011	0.032

## Sheet: PANTHER protein class
1	extracellular matrix protein (PC00102)	12	0.003	0.006
2	cytoskeletal protein (PC00085)	92	0.026	0.046
3	transporter (PC00227)	183	0.052	0.091
4	scaffold/adaptor protein (PC00226)	53	0.015	0.026
5	DNA metabolism protein (PC00009)	34	0.01	0.017
6	cell adhesion molecule (PC00069)	11	0.003	0.005
7	intercellular signal molecule (PC00207)	10	0.003	0.005
8	protein-binding activity modulator (PC00095)	59	0.017	0.029
9	RNA metabolism protein (PC00031)	116	0.033	0.058
10	calcium-binding protein (PC00060)	11	0.003	0.005
11	gene-specific transcriptional regulator (PC00264)	161	0.046	0.08
12	defense/immunity protein (PC00090)	11	0.003	0.005
13	translational protein (PC00263)	71	0.02	0.035
14	metabolite interconversion enzyme (PC00262)	424	0.12	0.21
15	protein modifying enzyme (PC00260)	291	0.083	0.144
16	chromatin/chromatin-binding, or -regulatory protein (PC00077)	32	0.009	0.016
17	transfer/carrier protein (PC00219)	10	0.003	0.005
18	membrane traffic protein (PC00150)	52	0.015	0.026
19	chaperone (PC00072)	26	0.007	0.013
20	cell junction protein (PC00070)	3	0.001	0.001
21	structural protein (PC00211)	7	0.002	0.003
22	storage protein (PC00210)	4	0.001	0.002
23	transmembrane signal receptor (PC00197)	344	0.098	0.171

## Sheet: PANTHER TM signal receptor
	Transmembrane Signal Receptor Analysis	Genes Involved
1	G-protein coupled receptor (PC00021)	134	0.39	0.993
2	tyrosine protein kinase receptor (PC00233)	1	0.003	0.007
Gene Identifier	Gene	Description of Gene
CAEEL|WormBase=WBGene00005183|UniProtKB=Q94168	C10G8	Serpentine receptor class gamma;srg-26;PTN000071368;orthologs	SERPENTINE RECEPTOR CLASS GAMMA (PTHR31627:SF36)	transmembrane signal receptor(PC00197)	Caenorhabditis elegans
CAEEL|WormBase=WBGene00006272|UniProtKB=P91860	F32A7	Seven TM Receptor;str-245;PTN000534734;orthologs	SEVEN TM RECEPTOR (PTHR22943:SF73)	G-protein coupled receptor(PC00021)	Caenorhabditis elegans
CAEEL|WormBase=WBGene00005061|UniProtKB=Q7YZG0	B0304	Serpentine Receptor, class A (Alpha);sra-35;PTN001264098;orthologs	SERPENTINE RECEPTOR, CLASS A (ALPHA) (PTHR31357:SF7)	transmembrane signal receptor(PC00197)	Caenorhabditis elegans
CAEEL|WormBase=WBGene00022604|UniProtKB=Q23292	ZC404	G_PROTEIN_RECEP_F1_2 domain-containing protein;dmsr-10;PTN000508864;orthologs	G_PROTEIN_RECEP_F1_2 DOMAIN-CONTAINING PROTEIN (PTHR47419:SF1)	transmembrane signal receptor(PC00197)	Caenorhabditis elegans
CAEEL|WormBase=WBGene00006179|UniProtKB=O16336	C09H5	Seven TM Receptor;str-130;PTN000535322;orthologs	SEVEN TM RECEPTOR (PTHR22943:SF41)	G-protein coupled receptor(PC00021)	Caenorhabditis elegans
CAEEL|WormBase=WBGene00005195|UniProtKB=Q86GC0	T19C4	Serpentine receptor class gamma;srg-38;PTN000774280;orthologs	SERPENTINE RECEPTOR CLASS GAMMA (PTHR31552:SF3)	transmembrane signal receptor(PC00197)	Caenorhabditis elegans
CAEEL|WormBase=WBGene00005711|UniProtKB=Q22124	T03G11	Serpentine Receptor, class U;sru-48;PTN000071259;orthologs	SERPENTINE RECEPTOR, CLASS U (PTHR46045:SF4)	transmembrane signal receptor(PC00197)	Caenorhabditis elegans
CAEEL|WormBase=WBGene00005718|UniProtKB=Q23041	T22B7	Serpentine Receptor, class V;srv-7;PTN001272608;orthologs	SERPENTINE RECEPTOR, CLASS V (PTHR31748:SF12)	transmembrane signal receptor(PC00197)	Caenorhabditis elegans
CAEEL|WormBase=WBGene00005479|UniProtKB=P91118	C32B5	Serpentine Receptor, class H;srh-274;PTN000533875;orthologs	SERPENTINE RECEPTOR, CLASS H (PTHR22941:SF19)	transmembrane signal receptor(PC00197)	Caenorhabditis elegans
CAEEL|WormBase=WBGene00005749|UniProtKB=O16980	T03D3	G_PROTEIN_RECEP_F1_2 domain-containing protein;srw-2;PTN000508791;orthologs	G_PROTEIN_RECEP_F1_2 DOMAIN-CONTAINING PROTEIN (PTHR22751:SF287)	G-protein coupled receptor(PC00021)	Caenorhabditis elegans
CAEEL|WormBase=WBGene00005303|UniProtKB=O16993	W03F9	Serpentine Receptor, class H;srh-82;PTN000534019;orthologs	SERPENTINE RECEPTOR, CLASS H (PTHR22941:SF302)	transmembrane signal receptor(PC00197)	Caenorhabditis elegans
CAEEL|WormBase=WBGene00005097|UniProtKB=P92002	F53F1	Serpentine receptor class delta-19;srd-19;PTN000535426;orthologs	SERPENTINE RECEPTOR, CLASS D (DELTA)-RELATED (PTHR22945:SF102)	G-protein coupled receptor(PC00021)	Caenorhabditis elegans
CAEEL|WormBase=WBGene00005171|UniProtKB=P91275	F26B1	Serpentine receptor class gamma-14;srg-14;PTN000780125;orthologs	SERPENTINE RECEPTOR CLASS GAMMA-11-RELATED (PTHR31627:SF45)	transmembrane signal receptor(PC00197)	Caenorhabditis elegans
CAEEL|WormBase=WBGene00005070|UniProtKB=Q95ZY4	C27D6	Serpentine receptor class beta-5;srb-5;PTN000774041;orthologs	SERPENTINE RECEPTOR CLASS BETA-5 (PTHR31216:SF7)	transmembrane signal receptor(PC00197)	Caenorhabditis elegans
CAEEL|WormBase=WBGene00005958|UniProtKB=O44641	K07C6	G_PROTEIN_RECEP_F1_2 domain-containing protein;srx-67;PTN000545044;orthologs	G_PROTEIN_RECEP_F1_2 DOMAIN-CONTAINING PROTEIN (PTHR23017:SF18)	G-protein coupled receptor(PC00021)	Caenorhabditis elegans
CAEEL|WormBase=WBGene00006277|UniProtKB=Q17709	C06B3	Seven TM Receptor;str-250;PTN000534795;orthologs	SEVEN TM RECEPTOR (PTHR22943:SF245)	G-protein coupled receptor(PC00021)	Caenorhabditis elegans
CAEEL|WormBase=WBGene00005071|UniProtKB=P54141	R05H5	Serpentine receptor class beta-6;srb-6;PTN000774050;orthologs	SERPENTINE RECEPTOR CLASS BETA-1-RELATED (PTHR31216:SF12)	transmembrane signal receptor(PC00197)	Caenorhabditis elegans
CAEEL|WormBase=WBGene00005953|UniProtKB=Q9N5J0	K09D9	G_PROTEIN_RECEP_F1_2 domain-containing protein;srx-62;PTN000545047;orthologs	G_PROTEIN_RECEP_F1_2 DOMAIN-CONTAINING PROTEIN (PTHR23017:SF7)	G-protein coupled receptor(PC00021)	Caenorhabditis elegans
CAEEL|WormBase=WBGene00005901|UniProtKB=Q9XVK3	R10D12	7TM_GPCR_Srx domain-containing protein;srx-10;PTN000506295;orthologs	7TM_GPCR_SRX DOMAIN-CONTAINING PROTEIN (PTHR22718:SF9)	G-protein coupled receptor(PC00021)	Caenorhabditis elegans
CAEEL|WormBase=WBGene00005240|UniProtKB=P91981	C50B6	Serpentine Receptor, class H;srh-15;PTN000534207;orthologs	SERPENTINE RECEPTOR, CLASS H (PTHR46891:SF7)	transmembrane signal receptor(PC00197)	Caenorhabditis elegans
CAEEL|WormBase=WBGene00016149|UniProtKB=G5EG36	C26F1	G_PROTEIN_RECEP_F1_2 domain-containing protein;frpr-3;PTN000508520;orthologs	G_PROTEIN_RECEP_F1_2 DOMAIN-CONTAINING PROTEIN (PTHR47323:SF6)	transmembrane signal receptor(PC00197)	Caenorhabditis elegans
CAEEL|WormBase=WBGene00006261|UniProtKB=Q22521	T16A9	Seven TM Receptor;str-230;PTN000535067;orthologs	SEVEN TM RECEPTOR (PTHR22943:SF35)	G-protein coupled receptor(PC00021)	Caenorhabditis elegans
CAEEL|WormBase=WBGene00005197|UniProtKB=Q22572	T19C4	Serpentine receptor class gamma;srg-40;PTN000774275;orthologs	SERPENTINE RECEPTOR CLASS GAMMA (PTHR31552:SF24)	transmembrane signal receptor(PC00197)	Caenorhabditis elegans
CAEEL|WormBase=WBGene00006006|UniProtKB=Q7JNP8	B0507	7TM_GPCR_Srx domain-containing protein;srx-115;PTN000544468;orthologs	7TM_GPCR_SRX DOMAIN-CONTAINING PROTEIN (PTHR46611:SF7)	transmembrane signal receptor(PC00197)	Caenorhabditis elegans
CAEEL|WormBase=WBGene00005188|UniProtKB=O61892	T07H8	Serpentine receptor class gamma-31;srg-31;PTN000544540;orthologs	SERPENTINE RECEPTOR CLASS GAMMA-31 (PTHR31552:SF26)	transmembrane signal receptor(PC00197)	Caenorhabditis elegans
CAEEL|WormBase=WBGene00005029|UniProtKB=Q09205	AH6	Serpentine receptor class alpha-3;sra-3;PTN000772997;orthologs	SERPENTINE RECEPTOR CLASS ALPHA-1-RELATED (PTHR31357:SF5)	transmembrane signal receptor(PC00197)	Caenorhabditis elegans
CAEEL|WormBase=WBGene00005317|UniProtKB=Q7YTT4	F21H7	Serpentine Receptor, class H;srh-98;PTN000534165;orthologs	SERPENTINE RECEPTOR, CLASS H (PTHR22941:SF51)	transmembrane signal receptor(PC00197)	Caenorhabditis elegans
CAEEL|WormBase=WBGene00005265|UniProtKB=Q7YXA6	Y54G11A	Serpentine Receptor, class H;srh-42;PTN000534068;orthologs	SERPENTINE RECEPTOR, CLASS H-RELATED (PTHR22941:SF8)	transmembrane signal receptor(PC00197)	Caenorhabditis elegans
CAEEL|WormBase=WBGene00005450|UniProtKB=O01447	C03G6	Serpentine Receptor, class H;srh-244;PTN000534185;orthologs	SERPENTINE RECEPTOR, CLASS H (PTHR22941:SF20)	transmembrane signal receptor(PC00197)	Caenorhabditis elegans
CAEEL|WormBase=WBGene00022675|UniProtKB=G5ECB2	ZK180	Gamma-aminobutyric acid type B receptor subunit 2;gbb-2;PTN000828918;orthologs	GAMMA-AMINOBUTYRIC ACID TYPE B RECEPTOR SUBUNIT 2 (PTHR10519:SF20)	G-protein coupled receptor(PC00021)	Caenorhabditis elegans

## Sheet: PANTHER Transporter Protein
	Transporter Protein Analysis	Genes Involved
	ion channel (PC00133)	64	0.35	0.441
	primary active transporter (PC00068)	38	0.208	0.262
	secondary carrier transporter (PC00258)	43	0.235	0.297
Gene Identifier	Gene	Description of Gene
CAEEL|WormBase=WBGene00006659|UniProtKB=Q23386	ZK1067	TWiK family of potassium channels;twk-4;PTN000108819;orthologs	TWIK FAMILY OF POTASSIUM CHANNELS (PTHR11003:SF156)	ion channel(PC00133)	Caenorhabditis elegans
CAEEL|WormBase=WBGene00003568|UniProtKB=G5ECW0	ZC168	Na_Ca eXchangers;ncx-3;PTN000222737;orthologs	NA_CA EXCHANGERS (PTHR11878:SF76)	secondary carrier transporter(PC00258)	Caenorhabditis elegans
CAEEL|WormBase=WBGene00006667|UniProtKB=Q19907	F29F11	TWiK family of potassium channels protein 12;twk-12;PTN000108760;orthologs	TWIK FAMILY OF POTASSIUM CHANNELS PROTEIN 12 (PTHR11003:SF152)	ion channel(PC00133)	Caenorhabditis elegans
CAEEL|WormBase=WBGene00002074|UniProtKB=Q19969	F32E10	Importin subunit alpha-3;ima-3;PTN000593741;orthologs	IMPORTIN SUBUNIT ALPHA (PTHR23316:SF28)	transporter(PC00227)	Caenorhabditis elegans
CAEEL|WormBase=WBGene00018002|UniProtKB=O44773	F33D11	Ion_trans_2 domain-containing protein;twk-47;PTN000108813;orthologs	ION_TRANS_2 DOMAIN-CONTAINING PROTEIN (PTHR11003:SF296)	ion channel(PC00133)	Caenorhabditis elegans
CAEEL|WormBase=WBGene00000843|UniProtKB=Q93561	F25D7	Derlin-1;cup-2;PTN000109917;orthologs	DERLIN-1 (PTHR11009:SF1)	primary active transporter(PC00068)	Caenorhabditis elegans
CAEEL|WormBase=WBGene00010758|UniProtKB=O45678	K10H10	MFS domain-containing protein;vnut-1;PTN000184389;orthologs	SOLUTE CARRIER FAMILY 17 MEMBER 9 (PTHR11662:SF279)	secondary carrier transporter(PC00258)	Caenorhabditis elegans
CAEEL|WormBase=WBGene00015412|UniProtKB=O44452	C04C3	Ligand-Gated ion Channel;lgc-9;PTN000435561;orthologs	LIGAND-GATED ION CHANNEL (PTHR18945:SF869)	ligand-gated ion channel(PC00141)	Caenorhabditis elegans
CAEEL|WormBase=WBGene00043980|UniProtKB=Q5WRR9	F11D5	MFS domain-containing protein;CELE_F11D5.7;PTN000627642;orthologs	MFS DOMAIN-CONTAINING PROTEIN (PTHR23503:SF10)	secondary carrier transporter(PC00258)	Caenorhabditis elegans
CAEEL|WormBase=WBGene00019656|UniProtKB=G5EE96	K11G12	Oxoglutarate_malate carrier protein;slc-25a10;PTN000640882;orthologs	MITOCHONDRIAL DICARBOXYLATE CARRIER (PTHR45618:SF13)	secondary carrier transporter(PC00258)	Caenorhabditis elegans
CAEEL|WormBase=WBGene00006658|UniProtKB=Q21529	M110	TWiK family of potassium channels;twk-3;PTN000108828;orthologs	TWIK FAMILY OF POTASSIUM CHANNELS (PTHR11003:SF288)	ion channel(PC00133)	Caenorhabditis elegans
CAEEL|WormBase=WBGene00004908|UniProtKB=Q9XUG5	C49C3	Transporter;snf-9;PTN000178359;orthologs	SODIUM-DEPENDENT NUTRIENT AMINO ACID TRANSPORTER 1-RELATED (PTHR11616:SF241)	primary active transporter(PC00068)	Caenorhabditis elegans
CAEEL|WormBase=WBGene00019550|UniProtKB=Q21381	K09C4	MFS domain-containing protein;CELE_K09C4.5;PTN000627648;orthologs	MFS DOMAIN-CONTAINING PROTEIN (PTHR23503:SF34)	secondary carrier transporter(PC00258)	Caenorhabditis elegans
CAEEL|WormBase=WBGene00021368|UniProtKB=Q965X4	Y37E11AR	Bestrophin homolog;best-20;PTN000077367;orthologs	BESTROPHIN HOMOLOG-RELATED (PTHR10736:SF58)	ion channel(PC00133)	Caenorhabditis elegans
CAEEL|WormBase=WBGene00015628|UniProtKB=Q17851	C09B9	Bestrophin-6;best-6;PTN001323117;orthologs	BESTROPHIN HOMOLOG-RELATED (PTHR10736:SF58)	ion channel(PC00133)	Caenorhabditis elegans
CAEEL|WormBase=WBGene00012116|UniProtKB=P91835	T28B8	DEgenerin Like;del-4;PTN000190016;orthologs	DEGENERIN LIKE (PTHR11690:SF153)	ion channel(PC00133)	Caenorhabditis elegans
CAEEL|WormBase=WBGene00003876|UniProtKB=Q17758	C06G8	Peptide transporter family 2;pept-2;PTN000183339;orthologs	PEPTIDE TRANSPORTER FAMILY 1 (PTHR11654:SF658)	transporter(PC00227)	Caenorhabditis elegans
CAEEL|WormBase=WBGene00001813|UniProtKB=O17895	F57A10	HAlF transporter (PGP related);haf-3;PTN000657642;orthologs	HALF TRANSPORTER (PGP RELATED) (PTHR24221:SF605)	ATP-binding cassette (ABC) transporter(PC00003)	Caenorhabditis elegans
CAEEL|WormBase=WBGene00012786|UniProtKB=G5EDJ9	Y43C5B	Uncharacterized protein;CELE_Y43C5B.3;PTN000640753;orthologs	PROTEIN CBG17655 (PTHR46314:SF4)	secondary carrier transporter(PC00258)	Caenorhabditis elegans
CAEEL|WormBase=WBGene00003174|UniProtKB=P34886	F16F9	Degenerin mec-10;mec-10;PTN000190045;orthologs	DEGENERIN MEC-10 (PTHR11690:SF267)	ion channel(PC00133)	Caenorhabditis elegans
CAEEL|WormBase=WBGene00006679|UniProtKB=Q21467	C33D12	TWiK family of potassium channels;twk-26;PTN000108800;orthologs	TWIK FAMILY OF POTASSIUM CHANNELS (PTHR11003:SF66)	ion channel(PC00133)	Caenorhabditis elegans
CAEEL|WormBase=WBGene00009768|UniProtKB=Q20444	F46B6	Uncharacterized protein;CELE_F46B6.2;PTN008597418;orthologs	MARVEL DOMAIN-CONTAINING PROTEIN (PTHR23320:SF162)	transporter(PC00227)	Caenorhabditis elegans
CAEEL|WormBase=WBGene00015286|UniProtKB=O17206	C01B12	Bestrophin homolog;best-3;PTN000077417;orthologs	BESTROPHIN-3 (PTHR10736:SF0)	ion channel(PC00133)	Caenorhabditis elegans
CAEEL|WormBase=WBGene00009218|UniProtKB=Q19878	F28D1	Fatty Acid CoA Synthetase family;acs-20;PTN000645475;orthologs	FATTY ACID COA SYNTHETASE FAMILY (PTHR43107:SF24)	secondary carrier transporter(PC00258)	Caenorhabditis elegans
CAEEL|WormBase=WBGene00017982|UniProtKB=O16298	F32D1	Uncharacterized protein;hpo-18;PTN000278576;orthologs	ATP SYNTHASE SUBUNIT EPSILON, MITOCHONDRIAL (PTHR12448:SF0)	ATP synthase(PC00002)	Caenorhabditis elegans
CAEEL|WormBase=WBGene00019549|UniProtKB=Q21382	K09C4	MFS domain-containing protein;CELE_K09C4.4;PTN001528531;orthologs	MFS DOMAIN-CONTAINING PROTEIN (PTHR23503:SF43)	secondary carrier transporter(PC00258)	Caenorhabditis elegans
CAEEL|WormBase=WBGene00017868|UniProtKB=A0A131MBV2	F27E11	Sodium_nucleoside cotransporter;slc-28.2;PTN000063572;orthologs	SOLUTE CARRIER FAMILY 28 MEMBER 3 (PTHR10590:SF4)	transporter(PC00227)	Caenorhabditis elegans
CAEEL|WormBase=WBGene00006677|UniProtKB=Q6BES3	F55C5	TWiK family of potassium channels;twk-24;PTN000108757;orthologs	TWIK FAMILY OF POTASSIUM CHANNELS (PTHR11003:SF307)	ion channel(PC00133)	Caenorhabditis elegans
CAEEL|WormBase=WBGene00000023|UniProtKB=Q9XW49	Y53C10A	ABC Transporter family;abt-5;PTN000442812;orthologs	ABC TRANSPORTER FAMILY (PTHR19229:SF151)	ATP-binding cassette (ABC) transporter(PC00003)	Caenorhabditis elegans
CAEEL|WormBase=WBGene00020046|UniProtKB=Q7YXH3	R13A1	Bestrophin homolog;best-16;PTN000077382;orthologs	BESTROPHIN HOMOLOG (PTHR10736:SF27)	ion channel(PC00133)	Caenorhabditis elegans

## Sheet: PANTHER calcium bindin protein 
	Calcium Binding Protein Analysis	Genes Involved
	calmodulin-related (PC00061)	8	0.727	1
Gene Identifier	Gene	Description of Gene
CAEEL|WormBase=WBGene00020163|UniProtKB=Q22107	T02G5	EF-hand domain-containing protein;CELE_T02G5.3;PTN001496109;orthologs	EF-HAND CALCIUM-BINDING DOMAIN-CONTAINING PROTEIN 7 (PTHR46819:SF1)	calmodulin-related(PC00061)	Caenorhabditis elegans
CAEEL|WormBase=WBGene00003564|UniProtKB=P36609	F10G8	Neuronal calcium sensor 2;ncs-2;PTN000551226;orthologs	NEURONAL CALCIUM SENSOR 2 (PTHR23055:SF69)	calmodulin-related(PC00061)	Caenorhabditis elegans
CAEEL|WormBase=WBGene00001577|UniProtKB=Q22422	T12A7	Gon-2 Extragenic Modifier;gem-4;PTN000092243;orthologs	GON-2 EXTRAGENIC MODIFIER (PTHR10857:SF139)	calcium-binding protein(PC00060)	Caenorhabditis elegans
CAEEL|WormBase=WBGene00003590|UniProtKB=Q27473	C28A5	Annexin;nex-3;PTN000052873;orthologs	ANNEXIN (PTHR10502:SF242)	calcium-binding protein(PC00060)	Caenorhabditis elegans
CAEEL|WormBase=WBGene00000822|UniProtKB=Q20203	F40E10	Calsequestrin;csq-1;PTN000004076;orthologs	CALSEQUESTRIN (PTHR10033:SF0)	calcium-binding protein(PC00060)	Caenorhabditis elegans
CAEEL|WormBase=WBGene00011183|UniProtKB=Q7YTK4	R09H10	EF-hand domain-containing protein;CELE_R09H10.6;PTN008506835;orthologs	EF-HAND DOMAIN-CONTAINING PROTEIN (PTHR10827:SF92)	calmodulin-related(PC00061)	Caenorhabditis elegans
CAEEL|WormBase=WBGene00003934|UniProtKB=G5EF37	F54C1	Paralysed Arrest at Two-fold;pat-10;PTN000550272;orthologs	PARALYSED ARREST AT TWO-FOLD (PTHR23050:SF227)	calmodulin-related(PC00061)	Caenorhabditis elegans
CAEEL|WormBase=WBGene00020378|UniProtKB=O02159	T09B4	Uncharacterized protein;CELE_T09B4.4;PTN001127538;orthologs	PROTEIN CBG12886 (PTHR23050:SF437)	calmodulin-related(PC00061)	Caenorhabditis elegans
CAEEL|WormBase=WBGene00269435|UniProtKB=A0A168GZC0	T27C10	Uncharacterized protein;CELE_T27C10.9;PTN008588410;orthologs	SUBFAMILY NOT NAMED (PTHR23050:SF560)	calmodulin-related(PC00061)	Caenorhabditis elegans
CAEEL|WormBase=WBGene00013028|UniProtKB=Q9XWW8	Y49A10A	EF-Hand domain-Containing protein 1 homolog;efhc-1;PTN000250125;orthologs	EF-HAND DOMAIN-CONTAINING PROTEIN 1 (PTHR12086:SF9)	calmodulin-related(PC00061)	Caenorhabditis elegans
CAEEL|WormBase=WBGene00006861|UniProtKB=Q18136	C24H10	CALmodulin related genes;cal-5;PTN000550310;orthologs	AT10229P-RELATED (PTHR23050:SF552)	calmodulin-related(PC00061)	Caenorhabditis elegans
