# Supplementary material for: fmo-4 promotes longevity and stress resistance via ER to mitochondria calcium regulation in C. elegans
Source: eLife journal article supplement (doi:10.7554/elife.99971), 2024-08-27
Supplement: supp7 [file 01DEC2023 fmo2 and fmo4 levels 2O4O 4O2k_data.xls]

## Sheet: Results
Block Type	96well
Chemistry	SYBR_GREEN
Experiment File Name	C:\Applied Biosystems\StepOne Software v2.3\experiments\Tuckowski\01DEC2023 fmo2 and fmo4 levels 2O4O 4O2k.eds
Experiment Run End Time	2023-12-01 10:00:10 AM EST
Instrument Type	steponeplus
Passive Reference	ROX
Well	Sample Name	Target Name	Task	Reporter	Quencher	RQ	RQ Min	RQ Max	Cт	Cт Mean	Cт SD	ΔCт	ΔCт Mean	ΔCт SE	HK Control ΔCт Mean	HK Control ΔCт SE	ΔΔCт	Automatic Ct Threshold	Ct Threshold	Automatic Baseline	Baseline Start	Baseline End	Efficiency	Tm1	Tm2	Tm3	Comments	HIGHSD	OUTLIERRG
A1	2O4O	fmo2	UNKNOWN	SYBR	None				22.8953	22.8636	0.0553228							TRUE	0.537155	TRUE	3	16	1	77.8117				N	N
A2	2O4O	cdc	UNKNOWN	SYBR	None	1	0.940374	1.06341	23.9431	23.9672	0.0481669		1.10355	0.0375084			0	TRUE	0.716162	TRUE	3	17	1	79.603				N	N
A3	2O4O	y45	UNKNOWN	SYBR	None	1	0.940637	1.06311	20.882	20.918	0.0473647		-1.94559	0.0373378			0	TRUE	0.59939	TRUE	3	14	1	81.5551				N	N
A4	4O2K	fmo2	UNKNOWN	SYBR	None				32.7742	32.8256	0.110174							TRUE	0.537155	TRUE	3	26	1	77.3733				N	N
A5	4O2K	cdc	UNKNOWN	SYBR	None	830.174	725.789	949.572	24.487	24.2319	0.1267		-8.59372	0.0819851			-9.69727	TRUE	0.716162	TRUE	3	18	1	79.6084				N	Y
A6	4O2K	y45	UNKNOWN	SYBR	None	1159.68	1033.21	1301.63	20.6634	20.7005	0.0741858		-12.1251	0.0704509			-10.1795	TRUE	0.59939	TRUE	3	14	1	81.8471				N	N
B1	2O4O	fmo2	UNKNOWN	SYBR	None				22.8959	22.8636	0.0553228							TRUE	0.537155	TRUE	3	16	1	77.6624				N	N
B2	2O4O	cdc	UNKNOWN	SYBR	None	1	0.940374	1.06341	23.9176	23.9672	0.0481669		1.10355	0.0375084			0	TRUE	0.716162	TRUE	3	17	1	79.4538				N	N
B3	2O4O	y45	UNKNOWN	SYBR	None	1	0.940637	1.06311	20.9176	20.918	0.0473647		-1.94559	0.0373378			0	TRUE	0.59939	TRUE	3	14	1	81.4058				N	N
B4	4O2K	fmo2	UNKNOWN	SYBR	None				32.9521	32.8256	0.110174							TRUE	0.537155	TRUE	3	26	1	77.2239				N	N
B5	4O2K	cdc	UNKNOWN	SYBR	None	830.174	725.789	949.572	24.1637	24.2319	0.1267		-8.59372	0.0819851			-9.69727	TRUE	0.716162	TRUE	3	17	1	79.6084				N	N
B6	4O2K	y45	UNKNOWN	SYBR	None	1159.68	1033.21	1301.63	20.5992	20.7005	0.0741858		-12.1251	0.0704509			-10.1795	TRUE	0.59939	TRUE	3	14	1	81.8471				N	N
C1	2O4O	fmo2	UNKNOWN	SYBR	None				22.7998	22.8636	0.0553228							TRUE	0.537155	TRUE	3	16	1	77.6624				N	N
C2	2O4O	cdc	UNKNOWN	SYBR	None	1	0.940374	1.06341	23.9308	23.9672	0.0481669		1.10355	0.0375084			0	TRUE	0.716162	TRUE	3	17	1	79.4538				N	N
C3	2O4O	y45	UNKNOWN	SYBR	None	1	0.940637	1.06311	20.9397	20.918	0.0473647		-1.94559	0.0373378			0	TRUE	0.59939	TRUE	3	14	1	81.4058				N	N
C4	4O2K	fmo2	UNKNOWN	SYBR	None				32.7506	32.8256	0.110174							TRUE	0.537155	TRUE	3	26	1	77.2239				N	N
C5	4O2K	cdc	UNKNOWN	SYBR	None	830.174	725.789	949.572	24.1777	24.2319	0.1267		-8.59372	0.0819851			-9.69727	TRUE	0.716162	TRUE	3	17	1	79.6084				N	N
C6	4O2K	y45	UNKNOWN	SYBR	None	1159.68	1033.21	1301.63	20.6716	20.7005	0.0741858		-12.1251	0.0704509			-10.1795	TRUE	0.59939	TRUE	3	14	1	81.6979				N	N
D1	2O4O	fmo4	UNKNOWN	SYBR	None	1	0.864561	1.15666	16.7462	16.7909	0.118724		-6.07272	0.0756218			0	TRUE	0.294419	TRUE	3	11	1	77.2146				N	N
D2	2O4O	cdc	UNKNOWN	SYBR	None	1	0.940374	1.06341	23.9712	23.9672	0.0481669		1.10355	0.0375084			0	TRUE	0.716162	TRUE	3	17	1	79.4538				N	N
D3	2O4O	y45	UNKNOWN	SYBR	None	1	0.940637	1.06311	20.8441	20.918	0.0473647		-1.94559	0.0373378			0	TRUE	0.59939	TRUE	3	14	1	81.4058				N	N
D4	4O2K	fmo4	UNKNOWN	SYBR	None	797.594	357.597	1778.97	16.7058	17.1134	0.713523		-15.7122	0.416835			-9.63951	TRUE	0.294419	TRUE	3	11	1	77.0746				Y	N
D5	4O2K	cdc	UNKNOWN	SYBR	None	830.174	725.789	949.572	24.2133	24.2319	0.1267		-8.59372	0.0819851			-9.69727	TRUE	0.716162	TRUE	3	17	1	79.6084				N	N
D6	4O2K	y45	UNKNOWN	SYBR	None	1159.68	1033.21	1301.63	20.7022	20.7005	0.0741858		-12.1251	0.0704509			-10.1795	TRUE	0.59939	TRUE	3	14	1	81.6979				N	N
E1	2O4O	fmo4	UNKNOWN	SYBR	None	1	0.864561	1.15666	16.7011	16.7909	0.118724		-6.07272	0.0756218			0	TRUE	0.294419	TRUE	3	11	1	77.2146				N	N
E2	2O4O	cdc	UNKNOWN	SYBR	None	1	0.940374	1.06341	23.992	23.9672	0.0481669		1.10355	0.0375084			0	TRUE	0.716162	TRUE	3	17	1	79.4538				N	N
E3	2O4O	y45	UNKNOWN	SYBR	None	1	0.940637	1.06311	20.9581	20.918	0.0473647		-1.94559	0.0373378			0	TRUE	0.59939	TRUE	3	14	1	81.4058				N	N
E4	4O2K	fmo4	UNKNOWN	SYBR	None	797.594	357.597	1778.97	16.6971	17.1134	0.713523		-15.7122	0.416835			-9.63951	TRUE	0.294419	TRUE	3	11	1	77.0746				Y	N
E5	4O2K	cdc	UNKNOWN	SYBR	None	830.174	725.789	949.572	24.1553	24.2319	0.1267		-8.59372	0.0819851			-9.69727	TRUE	0.716162	TRUE	3	17	1	79.6084				N	N
E6	4O2K	y45	UNKNOWN	SYBR	None	1159.68	1033.21	1301.63	20.758	20.7005	0.0741858		-12.1251	0.0704509			-10.1795	TRUE	0.59939	TRUE	3	14	1	81.6979				N	N
F1	2O4O	fmo4	UNKNOWN	SYBR	None	1	0.864561	1.15666	16.9255	16.7909	0.118724		-6.07272	0.0756218			0	TRUE	0.294419	TRUE	3	11	1	77.2146				N	N
F2	2O4O	cdc	UNKNOWN	SYBR	None	1	0.940374	1.06341	24.0485	23.9672	0.0481669		1.10355	0.0375084			0	TRUE	0.716162	TRUE	3	17	1	79.4538				N	N
F3	2O4O	y45	UNKNOWN	SYBR	None	1	0.940637	1.06311	20.9667	20.918	0.0473647		-1.94559	0.0373378			0	TRUE	0.59939	TRUE	3	14	1	81.5551				N	N
F4	4O2K	fmo4	UNKNOWN	SYBR	None	797.594	357.597	1778.97	17.9373	17.1134	0.713523		-15.7122	0.416835			-9.63951	TRUE	0.294419	TRUE	3	12	1	77.0746				Y	Y
F5	4O2K	cdc	UNKNOWN	SYBR	None	830.174	725.789	949.572	24.1945	24.2319	0.1267		-8.59372	0.0819851			-9.69727	TRUE	0.716162	TRUE	3	17	1	79.4591				N	N
F6	4O2K	y45	UNKNOWN	SYBR	None	1159.68	1033.21	1301.63	20.8088	20.7005	0.0741858		-12.1251	0.0704509			-10.1795	TRUE	0.59939	TRUE	3	14	1	81.6979				N	N
Analysis Type	Singleplex
Endogenous Control	fmo2
RQ Min/Max Confidence Level	95.0
Reference Sample	2O4O

## Sheet: Sheet1
2O4O	Ct mean	Ct SD	Geo Mean
cdc-42	23.9672	0.0481669	22.3908	0.0706813
Y45F10D.4	20.918	0.0473647
fmo-2	22.8636	0.0553228
										Worm Strain	Primer	Fold Change
										FMO-2OE;4OE	fmo2	51.1
											fmo4	10.4
										FMO-4OE;2KO	fmo2	0.05
											fmo4	8.3
N2
cdc-42	23.6621	0.0561202	22.0935	0.104126		fmo-2
Y45F10D.4	20.6288	0.0890204
fmo-2	28.2414	0.22598					Geo Mean Fold Change
					fmo-2	-5.67505	51.093
2O4O	Ct mean	Ct SD	Geo Mean
cdc-42	23.9672	0.0481669	22.3908	0.0477641
Y45F10D.4	20.918	0.0473647
fmo-4	16.7909	0.118724
N2
cdc-42	23.6621	0.0561202	22.0935	0.111587		fmo-4
Y45F10D.4	20.6288	0.0890204
fmo-4	19.8703	0.278119					Geo Mean Fold Change
					fmo-4	-3.3767	10.3869
4O2K	Ct mean	Ct SD	Geo Mean
cdc-42	24.2319	0.1267	22.3967	0.0969502
Y45F10D.4	20.7005	0.0741858
fmo-2	32.8256	0.110174
N2
cdc-42	23.6621	0.0561202	22.0935	0.104126		fmo-2
Y45F10D.4	20.6288	0.0890204
fmo-2	28.2414	0.22598					Geo Mean Fold Change
					fmo-2	4.28099	0.0514393
4O2K	Ct mean	Ct SD	Geo Mean
cdc-42	24.2319	0.1267	22.3967	0.188583
Y45F10D.4	20.7005	0.0741858
fmo-4	17.1134	0.713523
N2
cdc-42	23.6621	0.0561202	22.0935	0.111587		fmo-4
Y45F10D.4	20.6288	0.0890204
fmo-4	19.8703	0.278119					Geo Mean Fold Change
					fmo-4	-3.06017	8.34071
