# Supplementary material for: fmo-4 promotes longevity and stress resistance via ER to mitochondria calcium regulation in C. elegans
Source: eLife journal article supplement (doi:10.7554/elife.99971), 2024-08-27
Supplement: supp7 [file 01feb2024 fmo4 with 4oe hyp sp levels.xls]

## Sheet: Results
Block Type	96well
Chemistry	SYBR_GREEN
Experiment File Name	C:\Applied Biosystems\StepOne Software v2.3\experiments\Tuckowski\01feb2024 fmo4 and crt levels.eds
Experiment Run End Time	2024-02-01 10:25:22 AM EST
Instrument Type	steponeplus
Passive Reference	ROX
Well	Sample Name	Target Name	Task	Reporter	Quencher	RQ	RQ Min	RQ Max	Cт	Cт Mean	Cт SD	ΔCт	ΔCт Mean	ΔCт SE	HK Control ΔCт Mean	HK Control ΔCт SE	ΔΔCт	Automatic Ct Threshold	Ct Threshold	Automatic Baseline	Baseline Start	Baseline End	Efficiency	Tm1	Tm2	Tm3	Comments	HIGHSD	NOAMP	EXPFAIL	MTP
A1	n2	fmo4	UNKNOWN	SYBR	None				22.6893	22.6628	0.0301842							TRUE	0.37394	TRUE	3	17	1	77.5175				N	N	N	N
A2	n2	cdc	UNKNOWN	SYBR	None	1	0.936918	1.06733	23.4577	23.5909	0.0875237		0.92811	0.0397546			0	TRUE	1.08787	TRUE	3	16	1	79.7553				N	N	N	N
A3	n2	y45	UNKNOWN	SYBR	None	1	0.945159	1.05802	20.5662	20.6863	0.0726826		-1.9765	0.0344115			0	TRUE	0.703128	TRUE	3	13	1	81.7065				N	N	N	N
A4	atf6	fmo4	UNKNOWN	SYBR	None				22.7292	22.8019	0.0899115							TRUE	0.37394	TRUE	3	17	1	77.2291				N	N	N	N
A5	atf6	cdc	UNKNOWN	SYBR	None	1.13584	1.03926	1.24138	23.5027	23.5463	0.038286		0.744357	0.0542125			-0.183753	TRUE	1.08787	TRUE	3	16	1	79.9045				N	N	N	N
A6	atf6	y45	UNKNOWN	SYBR	None	1.35743	1.24277	1.48266	20.3675	20.3846	0.0350037		-2.41737	0.0538415			-0.440873	TRUE	0.703128	TRUE	3	13	1	81.9931				N	N	N	N
A7	crt1	fmo4	UNKNOWN	SYBR	None				14.2691	16.9811	2.81781							TRUE	0.37394	TRUE	1	2	1	77.3642				Y	N	N	N
A8	crt1	cdc	UNKNOWN	SYBR	None	0.0136534	0.00094765	0.196714	23.9759	24.1038	0.123328		7.1227	1.62764			6.19459	TRUE	1.08787	TRUE	1	2	1	79.6024				N	N	N	N
A9	crt1	y45	UNKNOWN	SYBR	None	0.0694036	0.0048182	0.999723	18.7045	18.8535	0.112054		1.87235	1.62751			3.84884	TRUE	0.703128	TRUE	1	2	1	81.841				N	N	N	N
A10	4oe	fmo4	UNKNOWN	SYBR	None				17.407	17.344	0.0557702							TRUE	0.37394	TRUE	3	11	1	77.3654				N	N	N	N
A11	4oe	cdc	UNKNOWN	SYBR	None	0.0206529	0.0193693	0.0220215	23.773	23.8696	0.0545372		6.52563	0.039147			5.59751	TRUE	1.08787	TRUE	3	16	1	79.4686				N	N	N	N
A12		y45	UNKNOWN	SYBR	None				20.6539	20.7371	0.090114							TRUE	0.703128	TRUE	3	13	1	81.7074				N	N	N	N
B1	n2	fmo4	UNKNOWN	SYBR	None				22.6693	22.6628	0.0301842							TRUE	0.37394	TRUE	3	17	1	77.3683				N	N	N	N
B2	n2	cdc	UNKNOWN	SYBR	None	1	0.936918	1.06733	23.5444	23.5909	0.0875237		0.92811	0.0397546			0	TRUE	1.08787	TRUE	3	16	1	79.6061				N	N	N	N
B3	n2	y45	UNKNOWN	SYBR	None	1	0.945159	1.05802	20.7581	20.6863	0.0726826		-1.9765	0.0344115			0	TRUE	0.703128	TRUE	3	13	1	81.5573				N	N	N	N
B4	atf6	fmo4	UNKNOWN	SYBR	None				22.9025	22.8019	0.0899115							TRUE	0.37394	TRUE	3	17	1	77.0799				N	N	N	N
B5	atf6	cdc	UNKNOWN	SYBR	None	1.13584	1.03926	1.24138	23.5029	23.5463	0.038286		0.744357	0.0542125			-0.183753	TRUE	1.08787	TRUE	3	16	1	79.9045				N	N	N	N
B6	atf6	y45	UNKNOWN	SYBR	None	1.35743	1.24277	1.48266	20.3826	20.3846	0.0350037		-2.41737	0.0538415			-0.440873	TRUE	0.703128	TRUE	3	13	1	81.9931				N	N	N	N
B7	crt1	fmo4	UNKNOWN	SYBR	None				16.7802	16.9811	2.81781							TRUE	0.37394	TRUE	1	2	1	77.215				Y	N	N	N
B8	crt1	cdc	UNKNOWN	SYBR	None	0.0136534	0.00094765	0.196714	24.0611	24.1038	0.123328		7.1227	1.62764			6.19459	TRUE	1.08787	TRUE	1	2	1	79.6024				N	N	N	N
B9	crt1	y45	UNKNOWN	SYBR	None	0.0694036	0.0048182	0.999723	18.8861	18.8535	0.112054		1.87235	1.62751			3.84884	TRUE	0.703128	TRUE	1	2	1	81.841				N	N	N	N
B10	4oe	fmo4	UNKNOWN	SYBR	None				17.3009	17.344	0.0557702							TRUE	0.37394	TRUE	3	11	1	77.3654				N	N	N	N
B11	4oe	cdc	UNKNOWN	SYBR	None	0.0206529	0.0193693	0.0220215	23.8969	23.8696	0.0545372		6.52563	0.039147			5.59751	TRUE	1.08787	TRUE	3	16	1	79.4686				N	N	N	N
B12		y45	UNKNOWN	SYBR	None				20.6654	20.7371	0.090114							TRUE	0.703128	TRUE	3	13	1	81.5581				N	N	N	N
C1	n2	fmo4	UNKNOWN	SYBR	None				22.6299	22.6628	0.0301842							TRUE	0.37394	TRUE	3	17	1	77.3683				N	N	N	N
C2	n2	cdc	UNKNOWN	SYBR	None	1	0.936918	1.06733	23.5954	23.5909	0.0875237		0.92811	0.0397546			0	TRUE	1.08787	TRUE	3	16	1	79.6061				N	N	N	N
C3	n2	y45	UNKNOWN	SYBR	None	1	0.945159	1.05802	20.6487	20.6863	0.0726826		-1.9765	0.0344115			0	TRUE	0.703128	TRUE	3	13	1	81.5573				N	N	N	N
C4	atf6	fmo4	UNKNOWN	SYBR	None				22.7742	22.8019	0.0899115							TRUE	0.37394	TRUE	3	17	1	77.2291				N	N	N	N
C5	atf6	cdc	UNKNOWN	SYBR	None	1.13584	1.03926	1.24138	23.5344	23.5463	0.038286		0.744357	0.0542125			-0.183753	TRUE	1.08787	TRUE	3	16	1	79.7553				N	N	N	N
C6	atf6	y45	UNKNOWN	SYBR	None	1.35743	1.24277	1.48266	20.3671	20.3846	0.0350037		-2.41737	0.0538415			-0.440873	TRUE	0.703128	TRUE	3	13	1	81.8439				N	N	N	N
C7	crt1	fmo4	UNKNOWN	SYBR	None				19.894	16.9811	2.81781							TRUE	0.37394	TRUE	1	3	1	77.215				Y	N	N	N
C8	crt1	cdc	UNKNOWN	SYBR	None	0.0136534	0.00094765	0.196714	24.3159	24.1038	0.123328		7.1227	1.62764			6.19459	TRUE	1.08787	TRUE	1	2	1	79.4532				N	N	N	N
C9	crt1	y45	UNKNOWN	SYBR	None	0.0694036	0.0048182	0.999723	18.734	18.8535	0.112054		1.87235	1.62751			3.84884	TRUE	0.703128	TRUE	1	2	1	81.841				N	N	N	N
C10	4oe	fmo4	UNKNOWN	SYBR	None				17.3241	17.344	0.0557702							TRUE	0.37394	TRUE	3	11	1	77.3654				N	N	N	N
C11	4oe	cdc	UNKNOWN	SYBR	None	0.0206529	0.0193693	0.0220215	23.9123	23.8696	0.0545372		6.52563	0.039147			5.59751	TRUE	1.08787	TRUE	3	16	1	79.4686				N	N	N	N
C12		y45	UNKNOWN	SYBR	None				20.9025	20.7371	0.090114							TRUE	0.703128	TRUE	3	14	1	81.4089				N	N	N	N
D1	n2	crt	UNKNOWN	SYBR	None				Undetermined									TRUE	0.0438262	TRUE	3	39	1	76.9207	92.4366	61.7032		N	N	Y	Y
D2	n2	cdc	UNKNOWN	SYBR	None	1	0.936918	1.06733	23.6937	23.5909	0.0875237		0.92811	0.0397546			0	TRUE	1.08787	TRUE	3	16	1	79.6061				N	N	N	N
D3	n2	y45	UNKNOWN	SYBR	None	1	0.945159	1.05802	20.6753	20.6863	0.0726826		-1.9765	0.0344115			0	TRUE	0.703128	TRUE	3	13	1	81.5573				N	N	N	N
D4	atf6	crt	UNKNOWN	SYBR	None				Undetermined									TRUE	0.0438262	TRUE	3	39	1	61.2597	92.7508			N	Y	Y	Y
D5	atf6	cdc	UNKNOWN	SYBR	None	1.13584	1.03926	1.24138	23.5703	23.5463	0.038286		0.744357	0.0542125			-0.183753	TRUE	1.08787	TRUE	3	16	1	79.7553				N	N	N	N
D6	atf6	y45	UNKNOWN	SYBR	None	1.35743	1.24277	1.48266	20.3453	20.3846	0.0350037		-2.41737	0.0538415			-0.440873	TRUE	0.703128	TRUE	3	13	1	81.8439				N	N	N	N
D7	crt1	crt	UNKNOWN	SYBR	None				5.90527	5.83659	0.192039		-11.1445	1.63064				TRUE	0.0438262	TRUE	1	3	1	61.3988				N	N	N	N
D8	crt1	cdc	UNKNOWN	SYBR	None	0.0136534	0.00094765	0.196714	24.0765	24.1038	0.123328		7.1227	1.62764			6.19459	TRUE	1.08787	TRUE	1	2	1	79.4532				N	N	N	N
D9	crt1	y45	UNKNOWN	SYBR	None	0.0694036	0.0048182	0.999723	18.9853	18.8535	0.112054		1.87235	1.62751			3.84884	TRUE	0.703128	TRUE	1	2	1	81.6919				N	N	N	N
D10	4oe	crt	UNKNOWN	SYBR	None				Undetermined									TRUE	0.0438262	TRUE	3	39	1	61.7005	92.2843	67.2205		N	Y	Y	Y
D11	4oe	cdc	UNKNOWN	SYBR	None	0.0206529	0.0193693	0.0220215	23.8725	23.8696	0.0545372		6.52563	0.039147			5.59751	TRUE	1.08787	TRUE	3	16	1	79.4686				N	N	N	N
D12		y45	UNKNOWN	SYBR	None				20.7075	20.7371	0.090114							TRUE	0.703128	TRUE	3	13	1	81.5581				N	N	N	N
E1	n2	crt	UNKNOWN	SYBR	None				Undetermined									TRUE	0.0438262	TRUE	3	39	1	92.5857	76.9207	69.0136		N	N	Y	Y
E2	n2	cdc	UNKNOWN	SYBR	None	1	0.936918	1.06733	23.678	23.5909	0.0875237		0.92811	0.0397546			0	TRUE	1.08787	TRUE	3	16	1	79.6061				N	N	N	N
E3	n2	y45	UNKNOWN	SYBR	None	1	0.945159	1.05802	20.7175	20.6863	0.0726826		-1.9765	0.0344115			0	TRUE	0.703128	TRUE	3	14	1	81.5573				N	N	N	N
E4	atf6	crt	UNKNOWN	SYBR	None				Undetermined									TRUE	0.0438262	TRUE	3	39	1	61.409	92.3031			N	Y	Y	Y
E5	atf6	cdc	UNKNOWN	SYBR	None	1.13584	1.03926	1.24138	23.5875	23.5463	0.038286		0.744357	0.0542125			-0.183753	TRUE	1.08787	TRUE	3	16	1	79.6062				N	N	N	N
E6	atf6	y45	UNKNOWN	SYBR	None	1.35743	1.24277	1.48266	20.399	20.3846	0.0350037		-2.41737	0.0538415			-0.440873	TRUE	0.703128	TRUE	3	13	1	81.8439				N	N	N	N
E7	crt1	crt	UNKNOWN	SYBR	None				5.98484	5.83659	0.192039		-11.1445	1.63064				TRUE	0.0438262	TRUE	1	3	1	61.3988				N	N	N	N
E8	crt1	cdc	UNKNOWN	SYBR	None	0.0136534	0.00094765	0.196714	24.0191	24.1038	0.123328		7.1227	1.62764			6.19459	TRUE	1.08787	TRUE	1	2	1	79.4532				N	N	N	N
E9	crt1	y45	UNKNOWN	SYBR	None	0.0694036	0.0048182	0.999723	18.8703	18.8535	0.112054		1.87235	1.62751			3.84884	TRUE	0.703128	TRUE	1	2	1	81.841				N	N	N	N
E10	4oe	crt	UNKNOWN	SYBR	None				Undetermined									TRUE	0.0438262	TRUE	3	39	1	61.8497	92.8811			N	Y	Y	Y
E11	4oe	cdc	UNKNOWN	SYBR	None	0.0206529	0.0193693	0.0220215	23.918	23.8696	0.0545372		6.52563	0.039147			5.59751	TRUE	1.08787	TRUE	3	16	1	79.4686				N	N	N	N
E12		y45	UNKNOWN	SYBR	None				20.7545	20.7371	0.090114							TRUE	0.703128	TRUE	3	13	1	81.5581				N	N	N	N
F1	n2	crt	UNKNOWN	SYBR	None				Undetermined									TRUE	0.0438262	TRUE	3	39	1	77.2191	92.1382	65.5822		N	N	Y	Y
F2	n2	cdc	UNKNOWN	SYBR	None	1	0.936918	1.06733	23.5763	23.5909	0.0875237		0.92811	0.0397546			0	TRUE	1.08787	TRUE	3	16	1	79.6061				N	N	N	N
F3	n2	y45	UNKNOWN	SYBR	None	1	0.945159	1.05802	20.7521	20.6863	0.0726826		-1.9765	0.0344115			0	TRUE	0.703128	TRUE	3	14	1	81.5573				N	N	N	N
F4	atf6	crt	UNKNOWN	SYBR	None				Undetermined									TRUE	0.0438262	TRUE	3	39	1	92.3031				N	Y	Y	N
F5	atf6	cdc	UNKNOWN	SYBR	None	1.13584	1.03926	1.24138	23.5799	23.5463	0.038286		0.744357	0.0542125			-0.183753	TRUE	1.08787	TRUE	3	16	1	79.6062				N	N	N	N
F6	atf6	y45	UNKNOWN	SYBR	None	1.35743	1.24277	1.48266	20.446	20.3846	0.0350037		-2.41737	0.0538415			-0.440873	TRUE	0.703128	TRUE	3	13	1	81.8439				N	N	N	N
F7	crt1	crt	UNKNOWN	SYBR	None				5.61965	5.83659	0.192039		-11.1445	1.63064				TRUE	0.0438262	TRUE	1	2	1	61.3988				N	N	N	N
F8	crt1	cdc	UNKNOWN	SYBR	None	0.0136534	0.00094765	0.196714	24.1743	24.1038	0.123328		7.1227	1.62764			6.19459	TRUE	1.08787	TRUE	1	2	1	79.4532				N	N	N	N
F9	crt1	y45	UNKNOWN	SYBR	None	0.0694036	0.0048182	0.999723	18.9406	18.8535	0.112054		1.87235	1.62751			3.84884	TRUE	0.703128	TRUE	1	2	1	81.841				N	N	N	N
F10	4oe	crt	UNKNOWN	SYBR	None				Undetermined									TRUE	0.0438262	TRUE	3	39	1	61.9989	92.5827	67.2205		N	Y	Y	Y
F11	4oe	cdc	UNKNOWN	SYBR	None	0.0206529	0.0193693	0.0220215	23.8449	23.8696	0.0545372		6.52563	0.039147			5.59751	TRUE	1.08787	TRUE	3	16	1	79.4686				N	N	N	N
F12		y45	UNKNOWN	SYBR	None				20.7386	20.7371	0.090114							TRUE	0.703128	TRUE	3	13	1	81.5581				N	N	N	N
Analysis Type	Singleplex
Endogenous Control	fmo4
RQ Min/Max Confidence Level	95.0
Reference Sample	n2

## Sheet: Sheet1
atf6	Ct mean	Ct SD	Geo Mean
cdc-42			#NUM!	#NUM!
Y45F10D.4
fmo-4
										Worm Strain	Primer	Fold Change
										FMO-4 OE hyp sp	fmo-4	44.5136
N2
cdc-42			#NUM!	#NUM!		fmo-4
Y45F10D.4
fmo-4							Geo Mean Fold Change
					fmo-4	#NUM!	#NUM!
CRT1	Ct mean	Ct SD	Geo Mean
cdc-42			#NUM!	#NUM!
Y45F10D.4
fmo4
N2
cdc-42			#NUM!	#NUM!		crt-1
Y45F10D.4
fmo4							Geo Mean Fold Change
					fmo-4	#NUM!	#NUM!
4OE hyp sp	Ct mean	Ct SD	Geo Mean
cdc-42	23.8696	0.0545372	22.2483	0.070104
Y45F10D.4	20.7371	0.090114
fmo-4	17.344	0.0557702
N2
cdc-42	23.5909	0.0875237	22.0909	0.0576915		fmo-4
Y45F10D.4	20.6863	0.0726826
fmo-4	22.6628	0.0301842					Geo Mean Fold Change
					fmo-4	-5.47617	44.5136
CRT-1	Ct mean	Ct SD	Geo Mean
cdc-42			#NUM!	#NUM!
Y45F10D.4
crt-1
N2
cdc-42			#NUM!	#NUM!		fmo-4
Y45F10D.4
crt-1							Geo Mean Fold Change
					crt1	#NUM!	#NUM!
				CRT-1 primer is not working
