# Supplementary material for: fmo-4 promotes longevity and stress resistance via ER to mitochondria calcium regulation in C. elegans
Source: eLife journal article supplement (doi:10.7554/elife.99971), 2024-08-27
Supplement: supp7 [file 05dec2023 fmo levels in2o4o 4o2k_data.xls]

## Sheet: Results
Block Type	96well
Chemistry	SYBR_GREEN
Experiment File Name	C:\Applied Biosystems\StepOne Software v2.3\experiments\Tuckowski\05dec2023 fmo levels in2o4o 4o2k.eds
Experiment Run End Time	2023-12-05 10:26:36 AM EST
Instrument Type	steponeplus
Passive Reference	ROX
Well	Sample Name	Target Name	Task	Reporter	Quencher	RQ	RQ Min	RQ Max	Cт	Cт Mean	Cт SD	ΔCт	ΔCт Mean	ΔCт SE	HK Control ΔCт Mean	HK Control ΔCт SE	ΔΔCт	Automatic Ct Threshold	Ct Threshold	Automatic Baseline	Baseline Start	Baseline End	Efficiency	Tm1	Tm2	Tm3	Comments	HIGHSD	OUTLIERRG
A1	n2	fmo2	UNKNOWN	SYBR	None				29.7479	29.7013	0.0639658							TRUE	0.519274	TRUE	3	23	1	77.6867				N	N
A2	n2	cdc	UNKNOWN	SYBR	None	1	0.876804	1.14051	23.3817	23.7127	0.174418		-5.98862	0.0802132			0	TRUE	0.615451	TRUE	3	16	1	79.4749				N	Y
A3	n2	y45	UNKNOWN	SYBR	None	1	0.923757	1.08254	20.7169	20.8441	0.0765758		-8.85719	0.0483858			0	TRUE	0.692505	TRUE	3	14	1	81.4333				N	N
A4	2o4o	fmo2	UNKNOWN	SYBR	None				22.7709	22.7955	0.0611073							TRUE	0.519274	TRUE	3	16	1	77.5585				N	N
A5	2o4o	cdc	UNKNOWN	SYBR	None	0.00579349	0.00513587	0.00653531	23.9891	24.2383	0.157969		1.44273	0.0735101			7.43135	TRUE	0.615451	TRUE	3	17	1	79.6283				N	N
A6	2o4o	y45	UNKNOWN	SYBR	None	0.00729861	0.00687848	0.0077444	21.0265	21.0365	0.0195477		-1.75903	0.0361716			7.09816	TRUE	0.692505	TRUE	3	14	1	81.864				N	N
A7	4o2k	fmo2	UNKNOWN	SYBR	None				35.9567	35.569	0.433381							TRUE	0.519274	TRUE	3	30	1	77.3876				N	N
A8	4o2k	cdc	UNKNOWN	SYBR	None	24.7364	16.0224	38.1897	24.6411	24.9518	0.213554		-10.6172	0.264967			-4.62857	TRUE	0.615451	TRUE	3	18	1	79.4744				N	N
A9	4o2k	y45	UNKNOWN	SYBR	None	53.4767	35.4505	80.669	21.0268	20.9709	0.0428435		-14.598	0.250823			-5.74084	TRUE	0.692505	TRUE	3	14	1	81.7084				N	N
B1	n2	fmo2	UNKNOWN	SYBR	None				29.6284	29.7013	0.0639658							TRUE	0.519274	TRUE	3	23	1	77.6867				N	N
B2	n2	cdc	UNKNOWN	SYBR	None	1	0.876804	1.14051	23.786	23.7127	0.174418		-5.98862	0.0802132			0	TRUE	0.615451	TRUE	3	16	1	79.4749				N	N
B3	n2	y45	UNKNOWN	SYBR	None	1	0.923757	1.08254	20.8315	20.8441	0.0765758		-8.85719	0.0483858			0	TRUE	0.692505	TRUE	3	14	1	81.4333				N	N
B4	2o4o	fmo2	UNKNOWN	SYBR	None				22.7506	22.7955	0.0611073							TRUE	0.519274	TRUE	3	16	1	77.4095				N	N
B5	2o4o	cdc	UNKNOWN	SYBR	None	0.00579349	0.00513587	0.00653531	24.1236	24.2383	0.157969		1.44273	0.0735101			7.43135	TRUE	0.615451	TRUE	3	17	1	79.6283				N	N
B6	2o4o	y45	UNKNOWN	SYBR	None	0.00729861	0.00687848	0.0077444	21.0261	21.0365	0.0195477		-1.75903	0.0361716			7.09816	TRUE	0.692505	TRUE	3	14	1	81.715				N	N
B7	4o2k	fmo2	UNKNOWN	SYBR	None				35.6491	35.569	0.433381							TRUE	0.519274	TRUE	3	29	1	77.3876				N	N
B8	4o2k	cdc	UNKNOWN	SYBR	None	24.7364	16.0224	38.1897	24.803	24.9518	0.213554		-10.6172	0.264967			-4.62857	TRUE	0.615451	TRUE	3	18	1	79.3253				N	N
B9	4o2k	y45	UNKNOWN	SYBR	None	53.4767	35.4505	80.669	20.9333	20.9709	0.0428435		-14.598	0.250823			-5.74084	TRUE	0.692505	TRUE	3	14	1	81.7084				N	N
C1	n2	fmo2	UNKNOWN	SYBR	None				29.7276	29.7013	0.0639658							TRUE	0.519274	TRUE	3	23	1	77.6867				N	N
C2	n2	cdc	UNKNOWN	SYBR	None	1	0.876804	1.14051	23.7298	23.7127	0.174418		-5.98862	0.0802132			0	TRUE	0.615451	TRUE	3	17	1	79.3259				N	N
C3	n2	y45	UNKNOWN	SYBR	None	1	0.923757	1.08254	20.8762	20.8441	0.0765758		-8.85719	0.0483858			0	TRUE	0.692505	TRUE	3	14	1	81.4333				N	N
C4	2o4o	fmo2	UNKNOWN	SYBR	None				22.8651	22.7955	0.0611073							TRUE	0.519274	TRUE	3	16	1	77.4095				N	N
C5	2o4o	cdc	UNKNOWN	SYBR	None	0.00579349	0.00513587	0.00653531	24.2514	24.2383	0.157969		1.44273	0.0735101			7.43135	TRUE	0.615451	TRUE	3	17	1	79.4793				N	N
C6	2o4o	y45	UNKNOWN	SYBR	None	0.00729861	0.00687848	0.0077444	21.0389	21.0365	0.0195477		-1.75903	0.0361716			7.09816	TRUE	0.692505	TRUE	3	14	1	81.715				N	N
C7	4o2k	fmo2	UNKNOWN	SYBR	None				35.1011	35.569	0.433381							TRUE	0.519274	TRUE	3	29	1	77.2386				N	N
C8	4o2k	cdc	UNKNOWN	SYBR	None	24.7364	16.0224	38.1897	25.2294	24.9518	0.213554		-10.6172	0.264967			-4.62857	TRUE	0.615451	TRUE	3	19	1	79.1763				N	N
C9	4o2k	y45	UNKNOWN	SYBR	None	53.4767	35.4505	80.669	20.991	20.9709	0.0428435		-14.598	0.250823			-5.74084	TRUE	0.692505	TRUE	3	14	1	81.5593				N	N
D1	n2	fmo4	UNKNOWN	SYBR	None	1	0.901008	1.10987	22.1281	22.1596	0.068631		-7.54164	0.0541659			0	TRUE	0.274413	TRUE	3	17	1	77.2396				N	N
D2	n2	cdc	UNKNOWN	SYBR	None	1	0.876804	1.14051	23.8301	23.7127	0.174418		-5.98862	0.0802132			0	TRUE	0.615451	TRUE	3	17	1	79.3259				N	N
D3	n2	y45	UNKNOWN	SYBR	None	1	0.923757	1.08254	20.8118	20.8441	0.0765758		-8.85719	0.0483858			0	TRUE	0.692505	TRUE	3	14	1	81.4333				N	N
D4	2o4o	fmo4	UNKNOWN	SYBR	None	0.275628	0.127941	0.593798	16.6898	17.1131	0.688035		-5.68243	0.398801			1.8592	TRUE	0.274413	TRUE	3	11	1	76.9624				Y	N
D5	2o4o	cdc	UNKNOWN	SYBR	None	0.00579349	0.00513587	0.00653531	24.309	24.2383	0.157969		1.44273	0.0735101			7.43135	TRUE	0.615451	TRUE	3	17	1	79.4793				N	N
D6	2o4o	y45	UNKNOWN	SYBR	None	0.00729861	0.00687848	0.0077444	21.0268	21.0365	0.0195477		-1.75903	0.0361716			7.09816	TRUE	0.692505	TRUE	3	14	1	81.5659				N	N
D7	4o2k	fmo4	UNKNOWN	SYBR	None	2842.61	1754.35	4605.93	16.5722	16.5543	0.0291999		-19.0146	0.25078			-11.473	TRUE	0.274413	TRUE	3	11	1	77.0895				N	N
D8	4o2k	cdc	UNKNOWN	SYBR	None	24.7364	16.0224	38.1897	24.9961	24.9518	0.213554		-10.6172	0.264967			-4.62857	TRUE	0.615451	TRUE	3	18	1	79.3253				N	N
D9	4o2k	y45	UNKNOWN	SYBR	None	53.4767	35.4505	80.669	20.9264	20.9709	0.0428435		-14.598	0.250823			-5.74084	TRUE	0.692505	TRUE	3	14	1	81.7084				N	N
E1	n2	fmo4	UNKNOWN	SYBR	None	1	0.901008	1.10987	22.1125	22.1596	0.068631		-7.54164	0.0541659			0	TRUE	0.274413	TRUE	3	16	1	77.2396				N	N
E2	n2	cdc	UNKNOWN	SYBR	None	1	0.876804	1.14051	23.8624	23.7127	0.174418		-5.98862	0.0802132			0	TRUE	0.615451	TRUE	3	17	1	79.3259				N	N
E3	n2	y45	UNKNOWN	SYBR	None	1	0.923757	1.08254	20.9375	20.8441	0.0765758		-8.85719	0.0483858			0	TRUE	0.692505	TRUE	3	14	1	81.4333				N	N
E4	2o4o	fmo4	UNKNOWN	SYBR	None	0.275628	0.127941	0.593798	16.7425	17.1131	0.688035		-5.68243	0.398801			1.8592	TRUE	0.274413	TRUE	3	11	1	76.9624				Y	N
E5	2o4o	cdc	UNKNOWN	SYBR	None	0.00579349	0.00513587	0.00653531	24.3274	24.2383	0.157969		1.44273	0.0735101			7.43135	TRUE	0.615451	TRUE	3	17	1	79.4793				N	N
E6	2o4o	y45	UNKNOWN	SYBR	None	0.00729861	0.00687848	0.0077444	21.075	21.0365	0.0195477		-1.75903	0.0361716			7.09816	TRUE	0.692505	TRUE	3	14	1	81.5659				N	N
E7	4o2k	fmo4	UNKNOWN	SYBR	None	2842.61	1754.35	4605.93	16.5701	16.5543	0.0291999		-19.0146	0.25078			-11.473	TRUE	0.274413	TRUE	3	11	1	77.0895				N	N
E8	4o2k	cdc	UNKNOWN	SYBR	None	24.7364	16.0224	38.1897	24.9185	24.9518	0.213554		-10.6172	0.264967			-4.62857	TRUE	0.615451	TRUE	3	18	1	79.3253				N	N
E9	4o2k	y45	UNKNOWN	SYBR	None	53.4767	35.4505	80.669	20.9406	20.9709	0.0428435		-14.598	0.250823			-5.74084	TRUE	0.692505	TRUE	3	14	1	81.7084				N	N
F1	n2	fmo4	UNKNOWN	SYBR	None	1	0.901008	1.10987	22.2384	22.1596	0.068631		-7.54164	0.0541659			0	TRUE	0.274413	TRUE	3	17	1	77.2396				N	N
F2	n2	cdc	UNKNOWN	SYBR	None	1	0.876804	1.14051	23.686	23.7127	0.174418		-5.98862	0.0802132			0	TRUE	0.615451	TRUE	3	16	1	79.3259				N	N
F3	n2	y45	UNKNOWN	SYBR	None	1	0.923757	1.08254	20.8907	20.8441	0.0765758		-8.85719	0.0483858			0	TRUE	0.692505	TRUE	3	14	1	81.4333				N	N
F4	2o4o	fmo4	UNKNOWN	SYBR	None	0.275628	0.127941	0.593798	17.907	17.1131	0.688035		-5.68243	0.398801			1.8592	TRUE	0.274413	TRUE	3	12	1	77.1114				Y	N
F5	2o4o	cdc	UNKNOWN	SYBR	None	0.00579349	0.00513587	0.00653531	24.4291	24.2383	0.157969		1.44273	0.0735101			7.43135	TRUE	0.615451	TRUE	3	18	1	79.3302				N	N
F6	2o4o	y45	UNKNOWN	SYBR	None	0.00729861	0.00687848	0.0077444	21.0257	21.0365	0.0195477		-1.75903	0.0361716			7.09816	TRUE	0.692505	TRUE	3	14	1	81.5659				N	N
F7	4o2k	fmo4	UNKNOWN	SYBR	None	2842.61	1754.35	4605.93	16.5206	16.5543	0.0291999		-19.0146	0.25078			-11.473	TRUE	0.274413	TRUE	3	11	1	77.0895				N	N
F8	4o2k	cdc	UNKNOWN	SYBR	None	24.7364	16.0224	38.1897	25.1227	24.9518	0.213554		-10.6172	0.264967			-4.62857	TRUE	0.615451	TRUE	3	19	1	79.3253				N	N
F9	4o2k	y45	UNKNOWN	SYBR	None	53.4767	35.4505	80.669	21.0074	20.9709	0.0428435		-14.598	0.250823			-5.74084	TRUE	0.692505	TRUE	3	14	1	81.7084				N	N
Analysis Type	Singleplex
Endogenous Control	fmo2
RQ Min/Max Confidence Level	95.0
Reference Sample	n2

## Sheet: Sheet1
2O4O	Ct mean	Ct SD	Geo Mean
cdc-42	24.2383	0.157969	22.5807	0.115569
Y45F10D.4	21.0365	0.0195477
fmo-2	22.7955	0.0611073
										Worm Strain	Primer	Fold Change
										FMO-2OE;4OE	fmo2	152.673
											fmo4	42.0809
										FMO-4OE;2KO	fmo2	0.0267389
											fmo4	76.0081
N2
cdc-42	23.7127	0.174418	22.2322	0.0948878		fmo-2
Y45F10D.4	20.8441	0.0765758
fmo-2	29.7013	0.0639658					Geo Mean Fold Change
					fmo-2	-7.2543	152.673
2O4O	Ct mean	Ct SD	Geo Mean
cdc-42	24.2383	0.157969	22.5807	0.0555691
Y45F10D.4	21.0365	0.0195477
fmo-4	17.1131	0.688035
N2
cdc-42	23.7127	0.174418	22.2322	0.0971407		fmo-4
Y45F10D.4	20.8441	0.0765758
fmo-4	22.1596	0.068631					Geo Mean Fold Change
					fmo-4	-5.39509	42.0809
4O2K	Ct mean	Ct SD	Geo Mean
cdc-42	24.9518	0.213554	22.8749	0.0956526
Y45F10D.4	20.9709	0.0428435
fmo-2	35.569	0.433381
N2
cdc-42	23.7127	0.174418	22.2322	0.0948878		fmo-2
Y45F10D.4	20.8441	0.0765758
fmo-2	29.7013	0.0639658					Geo Mean Fold Change
					fmo-2	5.22492	0.0267389
4O2K	Ct mean	Ct SD	Geo Mean
cdc-42	24.9518	0.213554	22.8749	0.0644058
Y45F10D.4	20.9709	0.0428435
fmo-4	16.5543	0.0291999
N2
cdc-42	23.7127	0.174418	22.2322	0.0971407		fmo-4
Y45F10D.4	20.8441	0.0765758
fmo-4	22.1596	0.068631					Geo Mean Fold Change
					fmo-4	-6.24808	76.0081
