# Supplementary material for: fmo-4 promotes longevity and stress resistance via ER to mitochondria calcium regulation in C. elegans
Source: eLife journal article supplement (doi:10.7554/elife.99971), 2024-08-27
Supplement: supp7 [file 05jan2024 2o4o 4o2k levels_data.xls]

## Sheet: Results
Block Type	96well
Chemistry	SYBR_GREEN
Experiment File Name	C:\Applied Biosystems\StepOne Software v2.3\experiments\Tuckowski\05jan2024 2o4o 4o2k levels.eds
Experiment Run End Time	2024-01-05 12:18:17 PM EST
Instrument Type	steponeplus
Passive Reference	ROX
Well	Sample Name	Target Name	Task	Reporter	Quencher	RQ	RQ Min	RQ Max	Cт	Cт Mean	Cт SD	ΔCт	ΔCт Mean	ΔCт SE	HK Control ΔCт Mean	HK Control ΔCт SE	ΔΔCт	Automatic Ct Threshold	Ct Threshold	Automatic Baseline	Baseline Start	Baseline End	Efficiency	Tm1	Tm2	Tm3	Comments	HIGHSD	MTP
A1	n2	fmo2	UNKNOWN	SYBR	None				28.9328	28.7485	0.164785							TRUE	0.285737	TRUE	3	23	1	77.6811				N	N
A2	n2	cdc	UNKNOWN	SYBR	None	1	0.809565	1.23523	23.2998	23.5415	0.213003		-5.20704	0.128892			0	TRUE	0.749421	TRUE	3	16	1	79.4699				N	N
A3	n2	y45	UNKNOWN	SYBR	None	1	0.554507	1.8034	20.7173	21.9198	0.849882		-6.82871	0.35977			0	TRUE	0.68445	TRUE	3	14	1	81.5736				Y	N
A4	2o4o	fmo2	UNKNOWN	SYBR	None				22.8866	22.4699	0.365973							TRUE	0.285737	TRUE	3	17	1	77.3986				N	N
A5	2o4o	cdc	UNKNOWN	SYBR	None	0.00998414	0.00704674	0.014146	23.9025	23.909	0.0572801		1.4391	0.212584			6.64615	TRUE	0.749421	TRUE	3	17	1	79.7692				N	N
A6	2o4o	y45	UNKNOWN	SYBR	None	0.0236901	0.0166932	0.0336197	20.9466	21.0407	0.0762212		-1.42914	0.213573			5.39957	TRUE	0.68445	TRUE	3	14	1	81.8559				N	N
A7	4o2k	fmo2	UNKNOWN	SYBR	None				31.2358	31.4045	0.243061							TRUE	0.285737	TRUE	3	25	1	77.5315	81.7061			N	Y
A8	4o2k	cdc	UNKNOWN	SYBR	None	3.70443	2.93593	4.67409	24.2851	24.3082	0.0507895		-7.0963	0.141855			-1.88925	TRUE	0.749421	TRUE	3	17	1	79.4697				N	N
A9	4o2k	y45	UNKNOWN	SYBR	None	12.3626	9.80381	15.5894	21.0208	20.9478	0.0442925		-10.4566	0.141491			-3.62792	TRUE	0.68445	TRUE	3	14	1	81.706				N	N
B1	n2	fmo2	UNKNOWN	SYBR	None				28.6971	28.7485	0.164785							TRUE	0.285737	TRUE	3	23	1	77.6811				N	N
B2	n2	cdc	UNKNOWN	SYBR	None	1	0.809565	1.23523	23.4796	23.5415	0.213003		-5.20704	0.128892			0	TRUE	0.749421	TRUE	3	17	1	79.4699				N	N
B3	n2	y45	UNKNOWN	SYBR	None	1	0.554507	1.8034	20.9373	21.9198	0.849882		-6.82871	0.35977			0	TRUE	0.68445	TRUE	3	14	1	81.4245				Y	N
B4	2o4o	fmo2	UNKNOWN	SYBR	None				22.2008	22.4699	0.365973							TRUE	0.285737	TRUE	3	17	1	77.3986				N	N
B5	2o4o	cdc	UNKNOWN	SYBR	None	0.00998414	0.00704674	0.014146	23.8428	23.909	0.0572801		1.4391	0.212584			6.64615	TRUE	0.749421	TRUE	3	17	1	79.6202				N	N
B6	2o4o	y45	UNKNOWN	SYBR	None	0.0236901	0.0166932	0.0336197	20.9938	21.0407	0.0762212		-1.42914	0.213573			5.39957	TRUE	0.68445	TRUE	3	14	1	81.8559				N	N
B7	4o2k	fmo2	UNKNOWN	SYBR	None				31.2945	31.4045	0.243061							TRUE	0.285737	TRUE	3	25	1	77.3824	81.2588			N	Y
B8	4o2k	cdc	UNKNOWN	SYBR	None	3.70443	2.93593	4.67409	24.2685	24.3082	0.0507895		-7.0963	0.141855			-1.88925	TRUE	0.749421	TRUE	3	17	1	79.4697				N	N
B9	4o2k	y45	UNKNOWN	SYBR	None	12.3626	9.80381	15.5894	20.9627	20.9478	0.0442925		-10.4566	0.141491			-3.62792	TRUE	0.68445	TRUE	3	14	1	81.706				N	N
C1	n2	fmo2	UNKNOWN	SYBR	None				28.6155	28.7485	0.164785							TRUE	0.285737	TRUE	3	23	1	77.5321				N	N
C2	n2	cdc	UNKNOWN	SYBR	None	1	0.809565	1.23523	23.9347	23.5415	0.213003		-5.20704	0.128892			0	TRUE	0.749421	TRUE	3	17	1	79.3209				N	N
C3	n2	y45	UNKNOWN	SYBR	None	1	0.554507	1.8034	22.4623	21.9198	0.849882		-6.82871	0.35977			0	TRUE	0.68445	TRUE	3	16	1	81.4245				Y	N
C4	2o4o	fmo2	UNKNOWN	SYBR	None				22.3222	22.4699	0.365973							TRUE	0.285737	TRUE	3	17	1	77.3986				N	N
C5	2o4o	cdc	UNKNOWN	SYBR	None	0.00998414	0.00704674	0.014146	23.8717	23.909	0.0572801		1.4391	0.212584			6.64615	TRUE	0.749421	TRUE	3	17	1	79.6202				N	N
C6	2o4o	y45	UNKNOWN	SYBR	None	0.0236901	0.0166932	0.0336197	21.0638	21.0407	0.0762212		-1.42914	0.213573			5.39957	TRUE	0.68445	TRUE	3	14	1	81.7068				N	N
C7	4o2k	fmo2	UNKNOWN	SYBR	None				31.6831	31.4045	0.243061							TRUE	0.285737	TRUE	3	26	1	77.3824				N	N
C8	4o2k	cdc	UNKNOWN	SYBR	None	3.70443	2.93593	4.67409	24.4022	24.3082	0.0507895		-7.0963	0.141855			-1.88925	TRUE	0.749421	TRUE	3	18	1	79.4697				N	N
C9	4o2k	y45	UNKNOWN	SYBR	None	12.3626	9.80381	15.5894	20.9079	20.9478	0.0442925		-10.4566	0.141491			-3.62792	TRUE	0.68445	TRUE	3	14	1	81.706				N	N
D1	n2	fmo4	UNKNOWN	SYBR	None	1	0.819791	1.21982	22.2529	22.2701	0.069486		-6.47841	0.103251			0	TRUE	0.280229	TRUE	3	17	1	77.2339				N	N
D2	n2	cdc	UNKNOWN	SYBR	None	1	0.809565	1.23523	23.5812	23.5415	0.213003		-5.20704	0.128892			0	TRUE	0.749421	TRUE	3	17	1	79.4699				N	N
D3	n2	y45	UNKNOWN	SYBR	None	1	0.554507	1.8034	22.4174	21.9198	0.849882		-6.82871	0.35977			0	TRUE	0.68445	TRUE	3	16	1	81.4245				Y	N
D4	2o4o	fmo4	UNKNOWN	SYBR	None	0.460943	0.192114	1.10595	16.7331	17.1088	0.697493		-5.36107	0.454764			1.11734	TRUE	0.280229	TRUE	3	11	1	76.9513				Y	N
D5	2o4o	cdc	UNKNOWN	SYBR	None	0.00998414	0.00704674	0.014146	24.0118	23.909	0.0572801		1.4391	0.212584			6.64615	TRUE	0.749421	TRUE	3	17	1	79.4712				N	N
D6	2o4o	y45	UNKNOWN	SYBR	None	0.0236901	0.0166932	0.0336197	21.0162	21.0407	0.0762212		-1.42914	0.213573			5.39957	TRUE	0.68445	TRUE	3	14	1	81.5578				N	N
D7	4o2k	fmo4	UNKNOWN	SYBR	None	318.354	239.241	423.629	16.6069	16.6116	0.0838784		-14.7929	0.148452			-8.31449	TRUE	0.280229	TRUE	3	11	1	77.0842				N	N
D8	4o2k	cdc	UNKNOWN	SYBR	None	3.70443	2.93593	4.67409	24.3304	24.3082	0.0507895		-7.0963	0.141855			-1.88925	TRUE	0.749421	TRUE	3	17	1	79.4697				N	N
D9	4o2k	y45	UNKNOWN	SYBR	None	12.3626	9.80381	15.5894	20.9673	20.9478	0.0442925		-10.4566	0.141491			-3.62792	TRUE	0.68445	TRUE	3	14	1	81.706				N	N
E1	n2	fmo4	UNKNOWN	SYBR	None	1	0.819791	1.21982	22.2108	22.2701	0.069486		-6.47841	0.103251			0	TRUE	0.280229	TRUE	3	17	1	77.2339				N	N
E2	n2	cdc	UNKNOWN	SYBR	None	1	0.809565	1.23523	23.477	23.5415	0.213003		-5.20704	0.128892			0	TRUE	0.749421	TRUE	3	17	1	79.4699				N	N
E3	n2	y45	UNKNOWN	SYBR	None	1	0.554507	1.8034	22.4549	21.9198	0.849882		-6.82871	0.35977			0	TRUE	0.68445	TRUE	3	16	1	81.4245				Y	N
E4	2o4o	fmo4	UNKNOWN	SYBR	None	0.460943	0.192114	1.10595	16.6797	17.1088	0.697493		-5.36107	0.454764			1.11734	TRUE	0.280229	TRUE	3	11	1	76.9513				Y	N
E5	2o4o	cdc	UNKNOWN	SYBR	None	0.00998414	0.00704674	0.014146	23.9119	23.909	0.0572801		1.4391	0.212584			6.64615	TRUE	0.749421	TRUE	3	17	1	79.4712				N	N
E6	2o4o	y45	UNKNOWN	SYBR	None	0.0236901	0.0166932	0.0336197	21.1698	21.0407	0.0762212		-1.42914	0.213573			5.39957	TRUE	0.68445	TRUE	3	14	1	81.5578				N	N
E7	4o2k	fmo4	UNKNOWN	SYBR	None	318.354	239.241	423.629	16.6977	16.6116	0.0838784		-14.7929	0.148452			-8.31449	TRUE	0.280229	TRUE	3	11	1	77.0842				N	N
E8	4o2k	cdc	UNKNOWN	SYBR	None	3.70443	2.93593	4.67409	24.2778	24.3082	0.0507895		-7.0963	0.141855			-1.88925	TRUE	0.749421	TRUE	3	17	1	79.3206				N	N
E9	4o2k	y45	UNKNOWN	SYBR	None	12.3626	9.80381	15.5894	20.9178	20.9478	0.0442925		-10.4566	0.141491			-3.62792	TRUE	0.68445	TRUE	3	14	1	81.706				N	N
F1	n2	fmo4	UNKNOWN	SYBR	None	1	0.819791	1.21982	22.3465	22.2701	0.069486		-6.47841	0.103251			0	TRUE	0.280229	TRUE	3	17	1	77.2339				N	N
F2	n2	cdc	UNKNOWN	SYBR	None	1	0.809565	1.23523	23.4764	23.5415	0.213003		-5.20704	0.128892			0	TRUE	0.749421	TRUE	3	16	1	79.3209				N	N
F3	n2	y45	UNKNOWN	SYBR	None	1	0.554507	1.8034	22.5296	21.9198	0.849882		-6.82871	0.35977			0	TRUE	0.68445	TRUE	3	16	1	81.4245				Y	N
F4	2o4o	fmo4	UNKNOWN	SYBR	None	0.460943	0.192114	1.10595	17.9136	17.1088	0.697493		-5.36107	0.454764			1.11734	TRUE	0.280229	TRUE	3	12	1	77.1004				Y	N
F5	2o4o	cdc	UNKNOWN	SYBR	None	0.00998414	0.00704674	0.014146	23.913	23.909	0.0572801		1.4391	0.212584			6.64615	TRUE	0.749421	TRUE	3	17	1	79.4712				N	N
F6	2o4o	y45	UNKNOWN	SYBR	None	0.0236901	0.0166932	0.0336197	21.0543	21.0407	0.0762212		-1.42914	0.213573			5.39957	TRUE	0.68445	TRUE	3	14	1	81.5578				N	N
F7	4o2k	fmo4	UNKNOWN	SYBR	None	318.354	239.241	423.629	16.5301	16.6116	0.0838784		-14.7929	0.148452			-8.31449	TRUE	0.280229	TRUE	3	11	1	77.2333				N	N
F8	4o2k	cdc	UNKNOWN	SYBR	None	3.70443	2.93593	4.67409	24.2851	24.3082	0.0507895		-7.0963	0.141855			-1.88925	TRUE	0.749421	TRUE	3	17	1	79.4697				N	N
F9	4o2k	y45	UNKNOWN	SYBR	None	12.3626	9.80381	15.5894	20.9106	20.9478	0.0442925		-10.4566	0.141491			-3.62792	TRUE	0.68445	TRUE	3	14	1	81.706				N	N
Analysis Type	Singleplex
Endogenous Control	fmo2
RQ Min/Max Confidence Level	95.0
Reference Sample	n2

## Sheet: Sheet1
2O4O	Ct mean	Ct SD	Geo Mean
cdc-42	23.909	0.0572801	22.429	0.425473
Y45F10D.4	21.0407	0.0762212
fmo-2	22.4699	0.365973
										Worm Strain	Primer	Fold Change
										FMO-2OE;4OE	fmo2	63.6
											fmo4	29.3
										FMO-4OE;2KO	fmo2	0.002
											fmo4	45.5
N2
cdc-42	23.5415	0.213003	22.7162	0.310137		fmo-2
Y45F10D.4	21.9198	0.849882
fmo-2	28.7485	0.164785					Geo Mean Fold Change
					fmo-2	-5.99152	63.625
2O4O	Ct mean	Ct SD	Geo Mean
cdc-42	23.909	0.0572801	22.429	0.0660754
Y45F10D.4	21.0407	0.0762212
fmo-4	17.1088	0.697493
N2
cdc-42	23.5415	0.213003	22.7162	0.232566		fmo-4
Y45F10D.4	21.9198	0.849882
fmo-4	22.2701	0.069486					Geo Mean Fold Change
					fmo-4	-4.87418	29.3275
4O2K	Ct mean	Ct SD	Geo Mean
cdc-42	24.3082	0.0507895	22.5655	0.0474299
Y45F10D.4	20.9478	0.0442925
fmo-2	31.4045	0.243061
N2
cdc-42	23.5415	0.213003	22.7162	0.404636		fmo-2
Y45F10D.4	21.9198	0.849882
fmo-2	22.4699	0.365973					Geo Mean Fold Change
					fmo-2	9.08522	0.0018411
4O2K	Ct mean	Ct SD	Geo Mean
cdc-42	24.3082	0.0507895	22.5655	0.0573568
Y45F10D.4	20.9478	0.0442925
fmo-4	16.6116	0.0838784
N2
cdc-42	23.5415	0.213003	22.7162	0.232566		fmo-4
Y45F10D.4	21.9198	0.849882
fmo-4	22.2701	0.069486					Geo Mean Fold Change
					fmo-4	-5.50791	45.5035
