# Supplementary material for: fmo-4 promotes longevity and stress resistance via ER to mitochondria calcium regulation in C. elegans
Source: eLife journal article supplement (doi:10.7554/elife.99971), 2024-08-27
Supplement: supp7 [file 05OCT2023 fmo4 and fmo2 levels in fmo4 mutants tuckowski_data.xls]

## Sheet: Results
Block Type	96well
Chemistry	SYBR_GREEN
Experiment File Name	C:\Applied Biosystems\StepOne Software v2.3\experiments\Tuckowski\05OCT2023 fmo4 and fmo2 levels in fmo4 mutants tuckowski.eds
Experiment Run End Time	2023-10-05 11:06:09 AM EDT
Instrument Type	steponeplus
Passive Reference	ROX
Well	Sample Name	Target Name	Task	Reporter	Quencher	RQ	RQ Min	RQ Max	Cт	Cт Mean	Cт SD	ΔCт	ΔCт Mean	ΔCт SE	HK Control ΔCт Mean	HK Control ΔCт SE	ΔΔCт	Automatic Ct Threshold	Ct Threshold	Automatic Baseline	Baseline Start	Baseline End	Efficiency	Tm1	Tm2	Tm3	Comments	HIGHSD	MTP
A1	n2	fmo4	UNKNOWN	SYBR	None	1	0.766555	1.30454	20.1738	19.8703	0.278119		-3.7918	0.162198			0	TRUE	0.0428124	TRUE	3	17	1	77.3896				N	N
A2	n2	cdc	UNKNOWN	SYBR	None				23.5635	23.6621	0.0561202							TRUE	0.643164	TRUE	3	17	1	79.7735				N	N
A3	n2	y45	UNKNOWN	SYBR	None	1	0.935802	1.0686	20.4769	20.6288	0.0890204		-3.0333	0.0429614			0	TRUE	0.666405	TRUE	3	14	1	81.5748				N	N
A4	4oe	fmo4	UNKNOWN	SYBR	None	139.3	129.731	149.576	12.4834	12.545	0.0677999		-10.9139	0.0434213			-7.12206	TRUE	0.0428124	TRUE	3	9	1	77.2533				N	N
A5	4oe	cdc	UNKNOWN	SYBR	None				23.3874	23.4589	0.0460307							TRUE	0.643164	TRUE	3	16	1	79.9208				N	N
A6	4oe	y45	UNKNOWN	SYBR	None	0.993732	0.960172	1.02847	20.4075	20.4346	0.0291568		-3.02423	0.0222446			0.00907071	TRUE	0.666405	TRUE	3	14	1	82.0069				N	N
A7	6.3	fmo4	UNKNOWN	SYBR	None	50.1993	42.5093	59.2805	14.2589	14.1619	0.162642		-9.4414	0.101449			-5.6496	TRUE	0.0428124	TRUE	3	11	1	77.3834				N	N
A8	6.3	cdc	UNKNOWN	SYBR	None				23.5596	23.6033	0.0940582							TRUE	0.643164	TRUE	3	17	1	79.6188				N	N
A9	6.3	y45	UNKNOWN	SYBR	None	1.14963	1.08158	1.22197	20.3857	20.3688	0.0227701		-3.23447	0.0395083			-0.201174	TRUE	0.666405	TRUE	3	14	1	81.8522				N	N
A10	4ko	fmo4	UNKNOWN	SYBR	None	2.70074e-05	3.18235e-06	0.000229202	37.1319	35.2925	2.2597		11.3845	1.30473			15.1763	TRUE	0.0428124	TRUE	3	34	1	81.7032				Y	N
A11	4ko	cdc	UNKNOWN	SYBR	None				23.8465	23.908	0.0373287							TRUE	0.643164	TRUE	3	17	1	79.4862				N	N
A12	4ko	y45	UNKNOWN	SYBR	None	1.00814	0.946784	1.07348	20.7998	20.863	0.0923318		-3.045	0.0406583			-0.0116997	TRUE	0.666405	TRUE	3	14	1	81.7215				N	N
B1	n2	fmo4	UNKNOWN	SYBR	None	1	0.766555	1.30454	19.8094	19.8703	0.278119		-3.7918	0.162198			0	TRUE	0.0428124	TRUE	3	17	1	77.3896				N	N
B2	n2	cdc	UNKNOWN	SYBR	None				23.7054	23.6621	0.0561202							TRUE	0.643164	TRUE	3	17	1	79.6245				N	N
B3	n2	y45	UNKNOWN	SYBR	None	1	0.935802	1.0686	20.7376	20.6288	0.0890204		-3.0333	0.0429614			0	TRUE	0.666405	TRUE	3	14	1	81.5748				N	N
B4	4oe	fmo4	UNKNOWN	SYBR	None	139.3	129.731	149.576	12.6177	12.545	0.0677999		-10.9139	0.0434213			-7.12206	TRUE	0.0428124	TRUE	3	9	1	77.1042				N	N
B5	4oe	cdc	UNKNOWN	SYBR	None				23.4237	23.4589	0.0460307							TRUE	0.643164	TRUE	3	17	1	79.7718				N	N
B6	4oe	y45	UNKNOWN	SYBR	None	0.993732	0.960172	1.02847	20.4263	20.4346	0.0291568		-3.02423	0.0222446			0.00907071	TRUE	0.666405	TRUE	3	13	1	81.8578				N	N
B7	6.3	fmo4	UNKNOWN	SYBR	None	50.1993	42.5093	59.2805	13.9741	14.1619	0.162642		-9.4414	0.101449			-5.6496	TRUE	0.0428124	TRUE	3	11	1	77.2344				N	N
B8	6.3	cdc	UNKNOWN	SYBR	None				23.5304	23.6033	0.0940582							TRUE	0.643164	TRUE	3	17	1	79.6188				N	N
B9	6.3	y45	UNKNOWN	SYBR	None	1.14963	1.08158	1.22197	20.3414	20.3688	0.0227701		-3.23447	0.0395083			-0.201174	TRUE	0.666405	TRUE	3	13	1	81.7032				N	N
B10	4ko	fmo4	UNKNOWN	SYBR	None	2.70074e-05	3.18235e-06	0.000229202	32.7701	35.2925	2.2597		11.3845	1.30473			15.1763	TRUE	0.0428124	TRUE	3	30	1	77.2326	83.0443			Y	Y
B11	4ko	cdc	UNKNOWN	SYBR	None				23.93	23.908	0.0373287							TRUE	0.643164	TRUE	3	17	1	79.4862				N	N
B12	4ko	y45	UNKNOWN	SYBR	None	1.00814	0.946784	1.07348	20.8652	20.863	0.0923318		-3.045	0.0406583			-0.0116997	TRUE	0.666405	TRUE	3	14	1	81.5725				N	N
C1	n2	fmo4	UNKNOWN	SYBR	None	1	0.766555	1.30454	19.6277	19.8703	0.278119		-3.7918	0.162198			0	TRUE	0.0428124	TRUE	3	17	1	77.3896				N	N
C2	n2	cdc	UNKNOWN	SYBR	None				23.6731	23.6621	0.0561202							TRUE	0.643164	TRUE	3	17	1	79.6245				N	N
C3	n2	y45	UNKNOWN	SYBR	None	1	0.935802	1.0686	20.5936	20.6288	0.0890204		-3.0333	0.0429614			0	TRUE	0.666405	TRUE	3	13	1	81.5748				N	N
C4	4oe	fmo4	UNKNOWN	SYBR	None	139.3	129.731	149.576	12.534	12.545	0.0677999		-10.9139	0.0434213			-7.12206	TRUE	0.0428124	TRUE	3	10	1	77.1042				N	N
C5	4oe	cdc	UNKNOWN	SYBR	None				23.4638	23.4589	0.0460307							TRUE	0.643164	TRUE	3	17	1	79.7718				N	N
C6	4oe	y45	UNKNOWN	SYBR	None	0.993732	0.960172	1.02847	20.4115	20.4346	0.0291568		-3.02423	0.0222446			0.00907071	TRUE	0.666405	TRUE	3	13	1	81.8578				N	N
C7	6.3	fmo4	UNKNOWN	SYBR	None	50.1993	42.5093	59.2805	14.2527	14.1619	0.162642		-9.4414	0.101449			-5.6496	TRUE	0.0428124	TRUE	3	11	1	77.2344				N	N
C8	6.3	cdc	UNKNOWN	SYBR	None				23.7371	23.6033	0.0940582							TRUE	0.643164	TRUE	3	17	1	79.4698				N	N
C9	6.3	y45	UNKNOWN	SYBR	None	1.14963	1.08158	1.22197	20.3455	20.3688	0.0227701		-3.23447	0.0395083			-0.201174	TRUE	0.666405	TRUE	3	13	1	81.7032				N	N
C10	4ko	fmo4	UNKNOWN	SYBR	None	2.70074e-05	3.18235e-06	0.000229202	35.9754	35.2925	2.2597		11.3845	1.30473			15.1763	TRUE	0.0428124	TRUE	3	33	1	80.0639	82.0012	68.8876		Y	Y
C11	4ko	cdc	UNKNOWN	SYBR	None				23.9141	23.908	0.0373287							TRUE	0.643164	TRUE	3	17	1	79.4862				N	N
C12	4ko	y45	UNKNOWN	SYBR	None	1.00814	0.946784	1.07348	20.7123	20.863	0.0923318		-3.045	0.0406583			-0.0116997	TRUE	0.666405	TRUE	3	14	1	81.5725				N	N
D1	n2	fmo2	UNKNOWN	SYBR	None	1	0.804836	1.24249	28.0556	28.2414	0.22598		4.57927	0.132466			0	TRUE	0.166438	TRUE	3	23	1	77.8366				N	N
D2	n2	cdc	UNKNOWN	SYBR	None				23.6783	23.6621	0.0561202							TRUE	0.643164	TRUE	3	17	1	79.6245				N	N
D3	n2	y45	UNKNOWN	SYBR	None	1	0.935802	1.0686	20.6598	20.6288	0.0890204		-3.0333	0.0429614			0	TRUE	0.666405	TRUE	3	14	1	81.5748				N	N
D4	4oe	fmo2	UNKNOWN	SYBR	None	1.83401	1.02114	3.29395	26.7746	27.1631	0.61796		3.70427	0.357274			-0.874999	TRUE	0.166438	TRUE	3	22	1	77.5513				Y	N
D5	4oe	cdc	UNKNOWN	SYBR	None				23.5133	23.4589	0.0460307							TRUE	0.643164	TRUE	3	17	1	79.6228				N	N
D6	4oe	y45	UNKNOWN	SYBR	None	0.993732	0.960172	1.02847	20.4216	20.4346	0.0291568		-3.02423	0.0222446			0.00907071	TRUE	0.666405	TRUE	3	13	1	81.8578				N	N
D7	6.3	fmo2	UNKNOWN	SYBR	None	0.727492	0.625962	0.84549	28.4956	28.6416	0.144249		5.03827	0.0917085			0.458996	TRUE	0.166438	TRUE	3	24	1	77.6815				N	N
D8	6.3	cdc	UNKNOWN	SYBR	None				23.6699	23.6033	0.0940582							TRUE	0.643164	TRUE	3	17	1	79.4698				N	N
D9	6.3	y45	UNKNOWN	SYBR	None	1.14963	1.08158	1.22197	20.3702	20.3688	0.0227701		-3.23447	0.0395083			-0.201174	TRUE	0.666405	TRUE	3	14	1	81.7032				N	N
D10	4ko	fmo2	UNKNOWN	SYBR	None	2.05998	1.69823	2.49879	27.3197	27.4446	0.202353		3.53664	0.117819			-1.04263	TRUE	0.166438	TRUE	3	22	1	77.6797				N	N
D11	4ko	cdc	UNKNOWN	SYBR	None				23.9534	23.908	0.0373287							TRUE	0.643164	TRUE	3	17	1	79.4862				N	N
D12	4ko	y45	UNKNOWN	SYBR	None	1.00814	0.946784	1.07348	20.9594	20.863	0.0923318		-3.045	0.0406583			-0.0116997	TRUE	0.666405	TRUE	3	14	1	81.5725				N	N
E1	n2	fmo2	UNKNOWN	SYBR	None	1	0.804836	1.24249	28.1756	28.2414	0.22598		4.57927	0.132466			0	TRUE	0.166438	TRUE	3	23	1	77.8366				N	N
E2	n2	cdc	UNKNOWN	SYBR	None				23.7172	23.6621	0.0561202							TRUE	0.643164	TRUE	3	17	1	79.4755				N	N
E3	n2	y45	UNKNOWN	SYBR	None	1	0.935802	1.0686	20.6789	20.6288	0.0890204		-3.0333	0.0429614			0	TRUE	0.666405	TRUE	3	14	1	81.5748				N	N
E4	4oe	fmo2	UNKNOWN	SYBR	None	1.83401	1.02114	3.29395	26.8391	27.1631	0.61796		3.70427	0.357274			-0.874999	TRUE	0.166438	TRUE	3	22	1	77.5513				Y	N
E5	4oe	cdc	UNKNOWN	SYBR	None				23.4744	23.4589	0.0460307							TRUE	0.643164	TRUE	3	16	1	79.6228				N	N
E6	4oe	y45	UNKNOWN	SYBR	None	0.993732	0.960172	1.02847	20.4799	20.4346	0.0291568		-3.02423	0.0222446			0.00907071	TRUE	0.666405	TRUE	3	13	1	81.7088				N	N
E7	6.3	fmo2	UNKNOWN	SYBR	None	0.727492	0.625962	0.84549	28.6452	28.6416	0.144249		5.03827	0.0917085			0.458996	TRUE	0.166438	TRUE	3	24	1	77.6815				N	N
E8	6.3	cdc	UNKNOWN	SYBR	None				23.4867	23.6033	0.0940582							TRUE	0.643164	TRUE	3	16	1	79.4698				N	N
E9	6.3	y45	UNKNOWN	SYBR	None	1.14963	1.08158	1.22197	20.3696	20.3688	0.0227701		-3.23447	0.0395083			-0.201174	TRUE	0.666405	TRUE	3	14	1	81.7032				N	N
E10	4ko	fmo2	UNKNOWN	SYBR	None	2.05998	1.69823	2.49879	27.6781	27.4446	0.202353		3.53664	0.117819			-1.04263	TRUE	0.166438	TRUE	3	23	1	77.6797				N	N
E11	4ko	cdc	UNKNOWN	SYBR	None				23.9182	23.908	0.0373287							TRUE	0.643164	TRUE	3	17	1	79.4862				N	N
E12	4ko	y45	UNKNOWN	SYBR	None	1.00814	0.946784	1.07348	20.9208	20.863	0.0923318		-3.045	0.0406583			-0.0116997	TRUE	0.666405	TRUE	3	14	1	81.5725				N	N
F1	n2	fmo2	UNKNOWN	SYBR	None	1	0.804836	1.24249	28.493	28.2414	0.22598		4.57927	0.132466			0	TRUE	0.166438	TRUE	3	24	1	77.6876				N	N
F2	n2	cdc	UNKNOWN	SYBR	None				23.6352	23.6621	0.0561202							TRUE	0.643164	TRUE	3	17	1	79.4755				N	N
F3	n2	y45	UNKNOWN	SYBR	None	1	0.935802	1.0686	20.6261	20.6288	0.0890204		-3.0333	0.0429614			0	TRUE	0.666405	TRUE	3	14	1	81.5748				N	N
F4	4oe	fmo2	UNKNOWN	SYBR	None	1.83401	1.02114	3.29395	27.8757	27.1631	0.61796		3.70427	0.357274			-0.874999	TRUE	0.166438	TRUE	3	23	1	77.7003				Y	N
F5	4oe	cdc	UNKNOWN	SYBR	None				23.4907	23.4589	0.0460307							TRUE	0.643164	TRUE	3	16	1	79.6228				N	N
F6	4oe	y45	UNKNOWN	SYBR	None	0.993732	0.960172	1.02847	20.461	20.4346	0.0291568		-3.02423	0.0222446			0.00907071	TRUE	0.666405	TRUE	3	13	1	81.7088				N	N
F7	6.3	fmo2	UNKNOWN	SYBR	None	0.727492	0.625962	0.84549	28.784	28.6416	0.144249		5.03827	0.0917085			0.458996	TRUE	0.166438	TRUE	3	24	1	77.6815				N	N
F8	6.3	cdc	UNKNOWN	SYBR	None				23.6363	23.6033	0.0940582							TRUE	0.643164	TRUE	3	17	1	79.4698				N	N
F9	6.3	y45	UNKNOWN	SYBR	None	1.14963	1.08158	1.22197	20.4006	20.3688	0.0227701		-3.23447	0.0395083			-0.201174	TRUE	0.666405	TRUE	3	13	1	81.7032				N	N
F10	4ko	fmo2	UNKNOWN	SYBR	None	2.05998	1.69823	2.49879	27.3361	27.4446	0.202353		3.53664	0.117819			-1.04263	TRUE	0.166438	TRUE	3	22	1	77.6797				N	N
F11	4ko	cdc	UNKNOWN	SYBR	None				23.8857	23.908	0.0373287							TRUE	0.643164	TRUE	3	17	1	79.4862				N	N
F12	4ko	y45	UNKNOWN	SYBR	None	1.00814	0.946784	1.07348	20.9204	20.863	0.0923318		-3.045	0.0406583			-0.0116997	TRUE	0.666405	TRUE	3	14	1	81.5725				N	N
Analysis Type	Singleplex
Endogenous Control	cdc
RQ Min/Max Confidence Level	95.0
Reference Sample	n2

## Sheet: Sheet1
4OE	Ct mean	Ct SD	Geo Mean
cdc-42	23.4589	0.0460307	21.8946	0.0706813
Y45F10D.4	20.4346	0.0291568
fmo-2	27.1631	0.61796
										Worm Strain	Primer	Fold Change
										FMO-4 OE	fmo2	1.83958
											fmo4	139.723
										FMO-4 OE hyp sp	fmo2	0.67495
											fmo4	46.5737
N2										FMO-4 KO	fmo2	2.05188
cdc-42	23.6621	0.0561202	22.0935	0.104126		fmo-2					fmo4	2.69011e-05
Y45F10D.4	20.6288	0.0890204
fmo-2	28.2414	0.22598					Geo Mean Fold Change
					fmo-2	-0.879375	1.83958
4OE	Ct mean	Ct SD	Geo Mean
cdc-42	23.4589	0.0460307	21.8946	0.0366348
Y45F10D.4	20.4346	0.0291568
fmo-4	12.545	0.0677999
N2
cdc-42	23.6621	0.0561202	22.0935	0.111587		fmo-4
Y45F10D.4	20.6288	0.0890204
fmo-4	19.8703	0.278119					Geo Mean Fold Change
					fmo-4	-7.12643	139.723
4OE 6.3	Ct mean	Ct SD	Geo Mean
cdc-42	23.6033	0.0940582	21.9265	0.0462786
Y45F10D.4	20.3688	0.0227701
fmo-2	28.6416	0.144249
N2
cdc-42	23.6621	0.0561202	22.0935	0.104126		fmo-2
Y45F10D.4	20.6288	0.0890204
fmo-2	28.2414	0.22598					Geo Mean Fold Change
					fmo-2	0.567148	0.67495
4OE 6.3	Ct mean	Ct SD	Geo Mean
cdc-42	23.6033	0.0940582	21.9265	0.0703608
Y45F10D.4	20.3688	0.0227701
fmo-4	14.1619	0.162642
N2
cdc-42	23.6621	0.0561202	22.0935	0.111587		fmo-4
Y45F10D.4	20.6288	0.0890204
fmo-4	19.8703	0.278119					Geo Mean Fold Change
					fmo-4	-5.54144	46.5737
4KO	Ct mean	Ct SD	Geo Mean
cdc-42	23.908	0.0373287	22.3337	0.0886819
Y45F10D.4	20.863	0.0923318
fmo-2	27.4446	0.202353
N2
cdc-42	23.6621	0.0561202	22.0935	0.104126		fmo-2
Y45F10D.4	20.6288	0.0890204
fmo-2	28.2414	0.22598					Geo Mean Fold Change
					fmo-2	-1.03694	2.05188
4KO	Ct mean	Ct SD	Geo Mean
cdc-42	23.908	0.0373287	22.3337	0.19822
Y45F10D.4	20.863	0.0923318
fmo-4	35.2925	2.2597
N2
cdc-42	23.6621	0.0561202	22.0935	0.0706813		fmo-4
Y45F10D.4	20.6288	0.0890204
fmo-4	19.8703	0.278119					Geo Mean Fold Change
					fmo-4	15.182	2.69011e-05
