# Supplementary material for: fmo-4 promotes longevity and stress resistance via ER to mitochondria calcium regulation in C. elegans
Source: eLife journal article supplement (doi:10.7554/elife.99971), 2024-08-27
Supplement: supp7 [file 08jan2024 fmo4 levels 2o4o 4o2k_data.xls]

## Sheet: Results
Block Type	96well
Chemistry	SYBR_GREEN
Experiment File Name	C:\Applied Biosystems\StepOne Software v2.3\experiments\Tuckowski\08jan2024 fmo4 levels 2o4o 4o2k.eds
Experiment Run End Time	2024-01-08 10:44:53 AM EST
Instrument Type	steponeplus
Passive Reference	ROX
Well	Sample Name	Target Name	Task	Reporter	Quencher	RQ	RQ Min	RQ Max	Cт	Cт Mean	Cт SD	ΔCт	ΔCт Mean	ΔCт SE	HK Control ΔCт Mean	HK Control ΔCт SE	ΔΔCт	Automatic Ct Threshold	Ct Threshold	Automatic Baseline	Baseline Start	Baseline End	Efficiency	Tm1	Tm2	Tm3	Comments	HIGHSD	OUTLIERRG	MTP
A1	n2	fmo2	UNKNOWN	SYBR	None				29.39	29.2858	0.104823							TRUE	0.404522	TRUE	3	23	1	77.692				N	N	N
A2	n2	cdc	UNKNOWN	SYBR	None	1	0.883919	1.13132	23.1033	23.2436	0.109674		-6.04225	0.0752818			0	TRUE	0.639786	TRUE	3	16	1	79.4798				N	N	N
A3	n2	y45	UNKNOWN	SYBR	None	1	0.892597	1.12033	22.4818	22.5777	0.0828066		-6.70811	0.0693212			0	TRUE	0.68476	TRUE	3	15	1	81.4358				N	N	N
A4	2o4o	fmo2	UNKNOWN	SYBR	None				22.1713	22.2731	0.0899653							TRUE	0.404522	TRUE	3	16	1	77.5615				N	N	N
A5	2o4o	cdc	UNKNOWN	SYBR	None	0.00580467	0.00484394	0.00695596	23.4899	23.6594	0.238601		1.38632	0.110392			7.42857	TRUE	0.639786	TRUE	3	17	1	79.7789				N	N	N
A6	2o4o	y45	UNKNOWN	SYBR	None	0.0239404	0.0218338	0.0262504	20.9394	20.9494	0.0525533		-1.32371	0.0561981			5.38441	TRUE	0.68476	TRUE	3	14	1	81.8648				N	N	N
A7	4o2k	fmo2	UNKNOWN	SYBR	None				35.6569	35.7726	0.147062							TRUE	0.404522	TRUE	3	30	1	77.3909	86.1821			N	N	Y
A8	4o2k	cdc	UNKNOWN	SYBR	None	44.5266	34.2292	57.9218	24.9273	24.2537	0.333525		-11.5188	0.160465			-5.47659	TRUE	0.639786	TRUE	3	18	1	79.4769				N	Y	N
A9	4o2k	y45	UNKNOWN	SYBR	None	276.093	239.717	317.989	21.0176	20.9555	0.0363836		-14.8171	0.086196			-8.10901	TRUE	0.68476	TRUE	3	14	1	81.7104				N	N	N
B1	n2	fmo2	UNKNOWN	SYBR	None				29.2871	29.2858	0.104823							TRUE	0.404522	TRUE	3	23	1	77.692				N	N	N
B2	n2	cdc	UNKNOWN	SYBR	None	1	0.883919	1.13132	23.2377	23.2436	0.109674		-6.04225	0.0752818			0	TRUE	0.639786	TRUE	3	16	1	79.4798				N	N	N
B3	n2	y45	UNKNOWN	SYBR	None	1	0.892597	1.12033	22.7011	22.5777	0.0828066		-6.70811	0.0693212			0	TRUE	0.68476	TRUE	3	16	1	81.4358				N	N	N
B4	2o4o	fmo2	UNKNOWN	SYBR	None				22.3421	22.2731	0.0899653							TRUE	0.404522	TRUE	3	17	1	77.4125				N	N	N
B5	2o4o	cdc	UNKNOWN	SYBR	None	0.00580467	0.00484394	0.00695596	23.5577	23.6594	0.238601		1.38632	0.110392			7.42857	TRUE	0.639786	TRUE	3	17	1	79.6299				N	N	N
B6	2o4o	y45	UNKNOWN	SYBR	None	0.0239404	0.0218338	0.0262504	21.05	20.9494	0.0525533		-1.32371	0.0561981			5.38441	TRUE	0.68476	TRUE	3	14	1	81.7158				N	N	N
B7	4o2k	fmo2	UNKNOWN	SYBR	None				35.7228	35.7726	0.147062							TRUE	0.404522	TRUE	3	30	1	77.3909				N	N	N
B8	4o2k	cdc	UNKNOWN	SYBR	None	44.5266	34.2292	57.9218	24.0871	24.2537	0.333525		-11.5188	0.160465			-5.47659	TRUE	0.639786	TRUE	3	18	1	79.4769				N	N	N
B9	4o2k	y45	UNKNOWN	SYBR	None	276.093	239.717	317.989	20.9436	20.9555	0.0363836		-14.8171	0.086196			-8.10901	TRUE	0.68476	TRUE	3	14	1	81.7104				N	N	N
C1	n2	fmo2	UNKNOWN	SYBR	None				29.1804	29.2858	0.104823							TRUE	0.404522	TRUE	3	23	1	77.692				N	N	N
C2	n2	cdc	UNKNOWN	SYBR	None	1	0.883919	1.13132	23.3006	23.2436	0.109674		-6.04225	0.0752818			0	TRUE	0.639786	TRUE	3	17	1	79.3308				N	N	N
C3	n2	y45	UNKNOWN	SYBR	None	1	0.892597	1.12033	22.5019	22.5777	0.0828066		-6.70811	0.0693212			0	TRUE	0.68476	TRUE	3	15	1	81.4358				N	N	N
C4	2o4o	fmo2	UNKNOWN	SYBR	None				22.3057	22.2731	0.0899653							TRUE	0.404522	TRUE	3	16	1	77.4125				N	N	N
C5	2o4o	cdc	UNKNOWN	SYBR	None	0.00580467	0.00484394	0.00695596	23.5719	23.6594	0.238601		1.38632	0.110392			7.42857	TRUE	0.639786	TRUE	3	17	1	79.6299				N	N	N
C6	2o4o	y45	UNKNOWN	SYBR	None	0.0239404	0.0218338	0.0262504	20.9312	20.9494	0.0525533		-1.32371	0.0561981			5.38441	TRUE	0.68476	TRUE	3	14	1	81.7158				N	N	N
C7	4o2k	fmo2	UNKNOWN	SYBR	None				35.9381	35.7726	0.147062							TRUE	0.404522	TRUE	3	30	1	77.2419	86.0331			N	N	Y
C8	4o2k	cdc	UNKNOWN	SYBR	None	44.5266	34.2292	57.9218	24.1937	24.2537	0.333525		-11.5188	0.160465			-5.47659	TRUE	0.639786	TRUE	3	17	1	79.3279				N	N	N
C9	4o2k	y45	UNKNOWN	SYBR	None	276.093	239.717	317.989	20.9321	20.9555	0.0363836		-14.8171	0.086196			-8.10901	TRUE	0.68476	TRUE	3	14	1	81.7104				N	N	N
D1	n2	fmo4	UNKNOWN	SYBR	None	1	0.844015	1.18481	22.0398	22.0535	0.110939		-7.23233	0.0881198			0	TRUE	0.188531	TRUE	3	17	1	77.0961				N	N	N
D2	n2	cdc	UNKNOWN	SYBR	None	1	0.883919	1.13132	23.3966	23.2436	0.109674		-6.04225	0.0752818			0	TRUE	0.639786	TRUE	3	17	1	79.3308				N	N	N
D3	n2	y45	UNKNOWN	SYBR	None	1	0.892597	1.12033	22.5524	22.5777	0.0828066		-6.70811	0.0693212			0	TRUE	0.68476	TRUE	3	15	1	81.4358				N	N	N
D4	2o4o	fmo4	UNKNOWN	SYBR	None	0.239973	0.105923	0.543673	16.7586	17.0998	0.730525		-5.17327	0.424955			2.05905	TRUE	0.188531	TRUE	3	11	1	76.9655				Y	N	N
D5	2o4o	cdc	UNKNOWN	SYBR	None	0.00580467	0.00484394	0.00695596	23.6017	23.6594	0.238601		1.38632	0.110392			7.42857	TRUE	0.639786	TRUE	3	17	1	79.4809				N	N	N
D6	2o4o	y45	UNKNOWN	SYBR	None	0.0239404	0.0218338	0.0262504	20.8953	20.9494	0.0525533		-1.32371	0.0561981			5.38441	TRUE	0.68476	TRUE	3	14	1	81.7158				N	N	N
D7	4o2k	fmo4	UNKNOWN	SYBR	None	4496.55	3798.73	5322.56	16.4335	16.4057	0.0375481		-19.3669	0.0876303			-12.1346	TRUE	0.188531	TRUE	3	11	1	77.0929				N	N	N
D8	4o2k	cdc	UNKNOWN	SYBR	None	44.5266	34.2292	57.9218	24.1292	24.2537	0.333525		-11.5188	0.160465			-5.47659	TRUE	0.639786	TRUE	3	17	1	79.3279				N	N	N
D9	4o2k	y45	UNKNOWN	SYBR	None	276.093	239.717	317.989	20.9116	20.9555	0.0363836		-14.8171	0.086196			-8.10901	TRUE	0.68476	TRUE	3	14	1	81.7104				N	N	N
E1	n2	fmo4	UNKNOWN	SYBR	None	1	0.844015	1.18481	21.95	22.0535	0.110939		-7.23233	0.0881198			0	TRUE	0.188531	TRUE	3	17	1	77.0961				N	N	N
E2	n2	cdc	UNKNOWN	SYBR	None	1	0.883919	1.13132	23.2881	23.2436	0.109674		-6.04225	0.0752818			0	TRUE	0.639786	TRUE	3	16	1	79.3308				N	N	N
E3	n2	y45	UNKNOWN	SYBR	None	1	0.892597	1.12033	22.5949	22.5777	0.0828066		-6.70811	0.0693212			0	TRUE	0.68476	TRUE	3	16	1	81.4358				N	N	N
E4	2o4o	fmo4	UNKNOWN	SYBR	None	0.239973	0.105923	0.543673	16.6022	17.0998	0.730525		-5.17327	0.424955			2.05905	TRUE	0.188531	TRUE	3	11	1	76.9655				Y	N	N
E5	2o4o	cdc	UNKNOWN	SYBR	None	0.00580467	0.00484394	0.00695596	24.1395	23.6594	0.238601		1.38632	0.110392			7.42857	TRUE	0.639786	TRUE	3	17	1	79.4809				N	Y	N
E6	2o4o	y45	UNKNOWN	SYBR	None	0.0239404	0.0218338	0.0262504	20.9313	20.9494	0.0525533		-1.32371	0.0561981			5.38441	TRUE	0.68476	TRUE	3	14	1	81.5668				N	N	N
E7	4o2k	fmo4	UNKNOWN	SYBR	None	4496.55	3798.73	5322.56	16.4205	16.4057	0.0375481		-19.3669	0.0876303			-12.1346	TRUE	0.188531	TRUE	3	11	1	77.0929				N	N	N
E8	4o2k	cdc	UNKNOWN	SYBR	None	44.5266	34.2292	57.9218	24.0501	24.2537	0.333525		-11.5188	0.160465			-5.47659	TRUE	0.639786	TRUE	3	17	1	79.3279				N	N	N
E9	4o2k	y45	UNKNOWN	SYBR	None	276.093	239.717	317.989	20.9662	20.9555	0.0363836		-14.8171	0.086196			-8.10901	TRUE	0.68476	TRUE	3	14	1	81.7104				N	N	N
F1	n2	fmo4	UNKNOWN	SYBR	None	1	0.844015	1.18481	22.1706	22.0535	0.110939		-7.23233	0.0881198			0	TRUE	0.188531	TRUE	3	17	1	77.0961				N	N	N
F2	n2	cdc	UNKNOWN	SYBR	None	1	0.883919	1.13132	23.1351	23.2436	0.109674		-6.04225	0.0752818			0	TRUE	0.639786	TRUE	3	16	1	79.3308				N	N	N
F3	n2	y45	UNKNOWN	SYBR	None	1	0.892597	1.12033	22.6341	22.5777	0.0828066		-6.70811	0.0693212			0	TRUE	0.68476	TRUE	3	16	1	81.4358				N	N	N
F4	2o4o	fmo4	UNKNOWN	SYBR	None	0.239973	0.105923	0.543673	17.9385	17.0998	0.730525		-5.17327	0.424955			2.05905	TRUE	0.188531	TRUE	3	13	1	76.9655				Y	N	N
F5	2o4o	cdc	UNKNOWN	SYBR	None	0.00580467	0.00484394	0.00695596	23.5956	23.6594	0.238601		1.38632	0.110392			7.42857	TRUE	0.639786	TRUE	3	17	1	79.4809				N	N	N
F6	2o4o	y45	UNKNOWN	SYBR	None	0.0239404	0.0218338	0.0262504	20.9491	20.9494	0.0525533		-1.32371	0.0561981			5.38441	TRUE	0.68476	TRUE	3	14	1	81.5668				N	N	N
F7	4o2k	fmo4	UNKNOWN	SYBR	None	4496.55	3798.73	5322.56	16.363	16.4057	0.0375481		-19.3669	0.0876303			-12.1346	TRUE	0.188531	TRUE	3	11	1	77.0929				N	N	N
F8	4o2k	cdc	UNKNOWN	SYBR	None	44.5266	34.2292	57.9218	24.135	24.2537	0.333525		-11.5188	0.160465			-5.47659	TRUE	0.639786	TRUE	3	18	1	79.3279				N	N	N
F9	4o2k	y45	UNKNOWN	SYBR	None	276.093	239.717	317.989	20.9617	20.9555	0.0363836		-14.8171	0.086196			-8.10901	TRUE	0.68476	TRUE	3	14	1	81.7104				N	N	N
Analysis Type	Singleplex
Endogenous Control	fmo2
RQ Min/Max Confidence Level	95.0
Reference Sample	n2

## Sheet: Sheet1
2O4O	Ct mean	Ct SD	Geo Mean
cdc-42	23.6594	0.238601	22.2632	0.0952983
Y45F10D.4	20.9494	0.0525533
fmo-2	22.2731	0.0899653
										Worm Strain	Primer	Fold Change
										FMO-2OE;4OE	fmo2	82.6
											fmo4	19.8
										FMO-4OE;2KO	fmo2	0.009
											fmo4	39
N2
cdc-42	23.2436	0.109674	22.9082	0.0983729		fmo-2
Y45F10D.4	22.5777	0.0828066
fmo-2	29.2858	0.104823					Geo Mean Fold Change
					fmo-2	-6.36771	82.5794
2O4O	Ct mean	Ct SD	Geo Mean
cdc-42	23.6594	0.238601	22.2632	0.111979
Y45F10D.4	20.9494	0.0525533
fmo-4	17.0998	0.730525
N2
cdc-42	23.2436	0.109674	22.9082	0.10025		fmo-4
Y45F10D.4	22.5777	0.0828066
fmo-4	22.0535	0.110939					Geo Mean Fold Change
					fmo-4	-4.30866	19.8169
4O2K	Ct mean	Ct SD	Geo Mean
cdc-42	24.2537	0.333525	22.5444	0.110158
Y45F10D.4	20.9555	0.0363836
fmo-2	35.7726	0.147062
N2
cdc-42	23.2436	0.109674	22.9082	0.0983729		fmo-2
Y45F10D.4	22.5777	0.0828066
fmo-2	29.2858	0.104823					Geo Mean Fold Change
					fmo-2	6.85062	0.00866479
4O2K	Ct mean	Ct SD	Geo Mean
cdc-42	24.2537	0.333525	22.5444	0.0769498
Y45F10D.4	20.9555	0.0363836
fmo-4	16.4057	0.0375481
N2
cdc-42	23.2436	0.109674	22.9082	0.10025		fmo-4
Y45F10D.4	22.5777	0.0828066
fmo-4	22.0535	0.110939					Geo Mean Fold Change
					fmo-4	-5.28398	38.9617
