# Supplementary material for: fmo-4 promotes longevity and stress resistance via ER to mitochondria calcium regulation in C. elegans
Source: eLife journal article supplement (doi:10.7554/elife.99971), 2024-08-27
Supplement: supp7 [file 09feb2024 fmo4 levels in 4oe hyp sp.xls]

## Sheet: Results
Block Type	96well
Chemistry	SYBR_GREEN
Experiment File Name	C:\Applied Biosystems\StepOne Software v2.3\experiments\Tuckowski\09feb2024 fmo4 and crt1 levels.eds
Experiment Run End Time	2024-02-09 10:33:59 AM EST
Instrument Type	steponeplus
Passive Reference	ROX
Well	Sample Name	Target Name	Task	Reporter	Quencher	RQ	RQ Min	RQ Max	Cт	Cт Mean	Cт SD	ΔCт	ΔCт Mean	ΔCт SE	HK Control ΔCт Mean	HK Control ΔCт SE	ΔΔCт	Automatic Ct Threshold	Ct Threshold	Automatic Baseline	Baseline Start	Baseline End	Efficiency	Tm1	Tm2	Tm3	Comments	HIGHSD	OUTLIERRG	MTP
A1	n2	fmo4	UNKNOWN	SYBR	None				24.1298	24.0945	0.0960042							TRUE	0.605647	TRUE	3	17	1	77.5346				N	N	N
A2	n2	cdc	UNKNOWN	SYBR	None	1	0.868487	1.15143	24.4761	24.62	0.161155		0.525473	0.0860278			0	TRUE	1.01068	TRUE	3	17	1	79.7701				N	N	N
A3	n2	y45	UNKNOWN	SYBR	None	1	0.796951	1.25478	21.1006	20.8883	0.31083		-3.2062	0.138473			0	TRUE	0.579849	TRUE	3	13	1	81.5553				N	N	N
A4	atf6 ko	fmo4	UNKNOWN	SYBR	None				23.4682	23.4691	0.0742962							TRUE	0.605647	TRUE	3	17	1	77.2304				N	N	N
A5	atf6 ko	cdc	UNKNOWN	SYBR	None	1.42493	1.31254	1.54693	23.5826	23.4836	0.0635165		0.0145871	0.0501235			-0.510886	TRUE	1.01068	TRUE	3	16	1	79.9069				N	N	N
A6	atf6 ko	y45	UNKNOWN	SYBR	None	1.07781	0.999921	1.16177	20.1443	20.1547	0.0390823		-3.31431	0.0457662			-0.108106	TRUE	0.579849	TRUE	3	13	1	81.9945				N	N	N
A7	crt1 ko	fmo4	UNKNOWN	SYBR	None				20.601	20.9086	0.289053							TRUE	0.605647	TRUE	1	2	1	77.366				N	N	N
A8	crt1 ko	cdc	UNKNOWN	SYBR	None	0.157382	0.11805	0.209819	24.2265	24.1017	0.132635		3.19313	0.17545			2.66766	TRUE	1.01068	TRUE	1	2	1	79.6027				N	N	N
A9	crt1 ko	y45	UNKNOWN	SYBR	None	0.34247	0.181309	0.64688	19.2519	19.2484	0.858053		-1.66025	0.38802			1.54595	TRUE	0.579849	TRUE	1	2	1	81.8365				Y	N	N
A10	4oe	fmo4	UNKNOWN	SYBR	None				17.9323	17.9214	0.0153462							TRUE	0.605647	TRUE	3	11	1	77.5109				N	N	N
A11	4oe	cdc	UNKNOWN	SYBR	None	0.0260269	0.0224691	0.0301479	23.5302	23.7107	0.218592		5.78933	0.0896787			5.26385	TRUE	1.01068	TRUE	3	16	1	79.6098				N	N	N
A12	4oe	y45	UNKNOWN	SYBR	None	0.0173684	0.0163104	0.018495	20.4329	20.5626	0.0913846		2.64119	0.0383453			5.84739	TRUE	0.579849	TRUE	3	12	1	81.6991				N	N	N
B1	n2	fmo4	UNKNOWN	SYBR	None				24.1679	24.0945	0.0960042							TRUE	0.605647	TRUE	3	18	1	77.3856				N	N	N
B2	n2	cdc	UNKNOWN	SYBR	None	1	0.868487	1.15143	24.5147	24.62	0.161155		0.525473	0.0860278			0	TRUE	1.01068	TRUE	3	17	1	79.6211				N	N	N
B3	n2	y45	UNKNOWN	SYBR	None	1	0.796951	1.25478	21.3729	20.8883	0.31083		-3.2062	0.138473			0	TRUE	0.579849	TRUE	3	14	1	81.5553				N	N	N
B4	atf6 ko	fmo4	UNKNOWN	SYBR	None				23.5438	23.4691	0.0742962							TRUE	0.605647	TRUE	3	17	1	77.2304				N	N	N
B5	atf6 ko	cdc	UNKNOWN	SYBR	None	1.42493	1.31254	1.54693	23.4279	23.4836	0.0635165		0.0145871	0.0501235			-0.510886	TRUE	1.01068	TRUE	3	16	1	79.9069				N	N	N
B6	atf6 ko	y45	UNKNOWN	SYBR	None	1.07781	0.999921	1.16177	20.1661	20.1547	0.0390823		-3.31431	0.0457662			-0.108106	TRUE	0.579849	TRUE	3	13	1	81.9945				N	N	N
B7	crt1 ko	fmo4	UNKNOWN	SYBR	None				20.9503	20.9086	0.289053							TRUE	0.605647	TRUE	1	2	1	77.2169				N	N	N
B8	crt1 ko	cdc	UNKNOWN	SYBR	None	0.157382	0.11805	0.209819	23.9888	24.1017	0.132635		3.19313	0.17545			2.66766	TRUE	1.01068	TRUE	1	2	1	79.4536				N	N	N
B9	crt1 ko	y45	UNKNOWN	SYBR	None	0.34247	0.181309	0.64688	18.8159	19.2484	0.858053		-1.66025	0.38802			1.54595	TRUE	0.579849	TRUE	1	2	1	81.6873				Y	N	N
B10	4oe	fmo4	UNKNOWN	SYBR	None				17.928	17.9214	0.0153462							TRUE	0.605647	TRUE	3	11	1	77.3618				N	N	N
B11	4oe	cdc	UNKNOWN	SYBR	None	0.0260269	0.0224691	0.0301479	23.6325	23.7107	0.218592		5.78933	0.0896787			5.26385	TRUE	1.01068	TRUE	3	16	1	79.4605				N	N	N
B12	4oe	y45	UNKNOWN	SYBR	None	0.0173684	0.0163104	0.018495	20.6079	20.5626	0.0913846		2.64119	0.0383453			5.84739	TRUE	0.579849	TRUE	3	13	1	81.5499				N	N	N
C1	n2	fmo4	UNKNOWN	SYBR	None				23.9859	24.0945	0.0960042							TRUE	0.605647	TRUE	3	17	1	77.3856				N	N	N
C2	n2	cdc	UNKNOWN	SYBR	None	1	0.868487	1.15143	24.5935	24.62	0.161155		0.525473	0.0860278			0	TRUE	1.01068	TRUE	3	17	1	79.6211				N	N	N
C3	n2	y45	UNKNOWN	SYBR	None	1	0.796951	1.25478	20.9598	20.8883	0.31083		-3.2062	0.138473			0	TRUE	0.579849	TRUE	3	14	1	81.5553				N	N	N
C4	atf6 ko	fmo4	UNKNOWN	SYBR	None				23.3952	23.4691	0.0742962							TRUE	0.605647	TRUE	3	17	1	77.2304				N	N	N
C5	atf6 ko	cdc	UNKNOWN	SYBR	None	1.42493	1.31254	1.54693	23.4878	23.4836	0.0635165		0.0145871	0.0501235			-0.510886	TRUE	1.01068	TRUE	3	16	1	79.7578				N	N	N
C6	atf6 ko	y45	UNKNOWN	SYBR	None	1.07781	0.999921	1.16177	20.1228	20.1547	0.0390823		-3.31431	0.0457662			-0.108106	TRUE	0.579849	TRUE	3	13	1	81.8454				N	N	N
C7	crt1 ko	fmo4	UNKNOWN	SYBR	None				21.1746	20.9086	0.289053							TRUE	0.605647	TRUE	1	2	1	77.2169				N	N	N
C8	crt1 ko	cdc	UNKNOWN	SYBR	None	0.157382	0.11805	0.209819	24.1201	24.1017	0.132635		3.19313	0.17545			2.66766	TRUE	1.01068	TRUE	1	2	1	79.4536				N	N	N
C9	crt1 ko	y45	UNKNOWN	SYBR	None	0.34247	0.181309	0.64688	18.8996	19.2484	0.858053		-1.66025	0.38802			1.54595	TRUE	0.579849	TRUE	1	3	1	81.6873				Y	N	N
C10	4oe	fmo4	UNKNOWN	SYBR	None				17.9039	17.9214	0.0153462							TRUE	0.605647	TRUE	3	11	1	77.3618				N	N	N
C11	4oe	cdc	UNKNOWN	SYBR	None	0.0260269	0.0224691	0.0301479	23.7812	23.7107	0.218592		5.78933	0.0896787			5.26385	TRUE	1.01068	TRUE	3	16	1	79.4605				N	N	N
C12	4oe	y45	UNKNOWN	SYBR	None	0.0173684	0.0163104	0.018495	20.4589	20.5626	0.0913846		2.64119	0.0383453			5.84739	TRUE	0.579849	TRUE	3	13	1	81.5499				N	N	N
D1	n2	crt	UNKNOWN	SYBR	None	1	0.543725	1.83916	29.967	30.3655	0.539915		6.27095	0.31661			0	TRUE	0.289815	TRUE	3	24	1	73.5107	82.0056			Y	N	Y
D2	n2	cdc	UNKNOWN	SYBR	None	1	0.868487	1.15143	24.931	24.62	0.161155		0.525473	0.0860278			0	TRUE	1.01068	TRUE	3	17	1	79.472				N	Y	N
D3	n2	y45	UNKNOWN	SYBR	None	1	0.796951	1.25478	20.6247	20.8883	0.31083		-3.2062	0.138473			0	TRUE	0.579849	TRUE	3	13	1	81.5553				N	N	N
D4	atf6 ko	crt	UNKNOWN	SYBR	None	0.373786	0.105813	1.32041	30.4225	31.1597	1.13339		7.69066	0.655765			1.41972	TRUE	0.289815	TRUE	3	24	1	73.2037	78.1252			Y	N	Y
D5	atf6 ko	cdc	UNKNOWN	SYBR	None	1.42493	1.31254	1.54693	23.5334	23.4836	0.0635165		0.0145871	0.0501235			-0.510886	TRUE	1.01068	TRUE	3	16	1	79.7578				N	N	N
D6	atf6 ko	y45	UNKNOWN	SYBR	None	1.07781	0.999921	1.16177	20.1091	20.1547	0.0390823		-3.31431	0.0457662			-0.108106	TRUE	0.579849	TRUE	3	12	1	81.8454				N	N	N
D7	crt1 ko	crt	UNKNOWN	SYBR	None	11385.8	6995.69	18530.8	13.3717	13.7046	0.329564		-7.204	0.253091			-13.4749	TRUE	0.289815	TRUE	1	2	1	73.3401	77.9625			N	N	Y
D8	crt1 ko	cdc	UNKNOWN	SYBR	None	0.157382	0.11805	0.209819	24.281	24.1017	0.132635		3.19313	0.17545			2.66766	TRUE	1.01068	TRUE	1	2	1	79.4536				N	N	N
D9	crt1 ko	y45	UNKNOWN	SYBR	None	0.34247	0.181309	0.64688	18.7225	19.2484	0.858053		-1.66025	0.38802			1.54595	TRUE	0.579849	TRUE	1	3	1	81.6873				Y	N	N
D10	4oe	crt	UNKNOWN	SYBR	None	0.0219889	0.019255	0.0251111	29.604	29.6994	0.118504		11.778	0.0689894			5.50708	TRUE	0.289815	TRUE	3	24	1	73.3345	78.4059			N	N	Y
D11	4oe	cdc	UNKNOWN	SYBR	None	0.0260269	0.0224691	0.0301479	23.9426	23.7107	0.218592		5.78933	0.0896787			5.26385	TRUE	1.01068	TRUE	3	16	1	79.4605				N	N	N
D12	4oe	y45	UNKNOWN	SYBR	None	0.0173684	0.0163104	0.018495	20.616	20.5626	0.0913846		2.64119	0.0383453			5.84739	TRUE	0.579849	TRUE	3	13	1	81.5499				N	N	N
E1	n2	crt	UNKNOWN	SYBR	None	1	0.543725	1.83916	30.1495	30.3655	0.539915		6.27095	0.31661			0	TRUE	0.289815	TRUE	3	24	1	73.5107	82.0056			Y	N	Y
E2	n2	cdc	UNKNOWN	SYBR	None	1	0.868487	1.15143	24.606	24.62	0.161155		0.525473	0.0860278			0	TRUE	1.01068	TRUE	3	17	1	79.472				N	N	N
E3	n2	y45	UNKNOWN	SYBR	None	1	0.796951	1.25478	20.6607	20.8883	0.31083		-3.2062	0.138473			0	TRUE	0.579849	TRUE	3	13	1	81.5553				N	N	N
E4	atf6 ko	crt	UNKNOWN	SYBR	None	0.373786	0.105813	1.32041	30.5919	31.1597	1.13339		7.69066	0.655765			1.41972	TRUE	0.289815	TRUE	3	24	1	73.2037	78.4234			Y	N	Y
E5	atf6 ko	cdc	UNKNOWN	SYBR	None	1.42493	1.31254	1.54693	23.4294	23.4836	0.0635165		0.0145871	0.0501235			-0.510886	TRUE	1.01068	TRUE	3	16	1	79.7578				N	N	N
E6	atf6 ko	y45	UNKNOWN	SYBR	None	1.07781	0.999921	1.16177	20.167	20.1547	0.0390823		-3.31431	0.0457662			-0.108106	TRUE	0.579849	TRUE	3	13	1	81.8454				N	N	N
E7	crt1 ko	crt	UNKNOWN	SYBR	None	11385.8	6995.69	18530.8	14.0307	13.7046	0.329564		-7.204	0.253091			-13.4749	TRUE	0.289815	TRUE	1	3	1	73.0418	78.2607			N	N	Y
E8	crt1 ko	cdc	UNKNOWN	SYBR	None	0.157382	0.11805	0.209819	23.946	24.1017	0.132635		3.19313	0.17545			2.66766	TRUE	1.01068	TRUE	1	2	1	79.4536				N	N	N
E9	crt1 ko	y45	UNKNOWN	SYBR	None	0.34247	0.181309	0.64688	20.9599	19.2484	0.858053		-1.66025	0.38802			1.54595	TRUE	0.579849	TRUE	3	4	1	81.6873				Y	Y	N
E10	4oe	crt	UNKNOWN	SYBR	None	0.0219889	0.019255	0.0251111	29.8321	29.6994	0.118504		11.778	0.0689894			5.50708	TRUE	0.289815	TRUE	3	24	1	73.4837	78.4059			N	N	Y
E11	4oe	cdc	UNKNOWN	SYBR	None	0.0260269	0.0224691	0.0301479	23.954	23.7107	0.218592		5.78933	0.0896787			5.26385	TRUE	1.01068	TRUE	3	17	1	79.4605				N	N	N
E12	4oe	y45	UNKNOWN	SYBR	None	0.0173684	0.0163104	0.018495	20.62	20.5626	0.0913846		2.64119	0.0383453			5.84739	TRUE	0.579849	TRUE	3	13	1	81.5499				N	N	N
F1	n2	crt	UNKNOWN	SYBR	None	1	0.543725	1.83916	30.9799	30.3655	0.539915		6.27095	0.31661			0	TRUE	0.289815	TRUE	3	25	1	73.3616				Y	N	N
F2	n2	cdc	UNKNOWN	SYBR	None	1	0.868487	1.15143	24.5988	24.62	0.161155		0.525473	0.0860278			0	TRUE	1.01068	TRUE	3	17	1	79.472				N	N	N
F3	n2	y45	UNKNOWN	SYBR	None	1	0.796951	1.25478	20.6113	20.8883	0.31083		-3.2062	0.138473			0	TRUE	0.579849	TRUE	3	13	1	81.5553				N	N	N
F4	atf6 ko	crt	UNKNOWN	SYBR	None	0.373786	0.105813	1.32041	32.4648	31.1597	1.13339		7.69066	0.655765			1.41972	TRUE	0.289815	TRUE	3	26	1	73.3529	92.1438	78.4234		Y	N	Y
F5	atf6 ko	cdc	UNKNOWN	SYBR	None	1.42493	1.31254	1.54693	23.4407	23.4836	0.0635165		0.0145871	0.0501235			-0.510886	TRUE	1.01068	TRUE	3	16	1	79.6087				N	N	N
F6	atf6 ko	y45	UNKNOWN	SYBR	None	1.07781	0.999921	1.16177	20.2191	20.1547	0.0390823		-3.31431	0.0457662			-0.108106	TRUE	0.579849	TRUE	3	13	1	81.6963				N	N	N
F7	crt1 ko	crt	UNKNOWN	SYBR	None	11385.8	6995.69	18530.8	13.7114	13.7046	0.329564		-7.204	0.253091			-13.4749	TRUE	0.289815	TRUE	1	2	1	73.0418	78.5589			N	N	Y
F8	crt1 ko	cdc	UNKNOWN	SYBR	None	0.157382	0.11805	0.209819	24.0479	24.1017	0.132635		3.19313	0.17545			2.66766	TRUE	1.01068	TRUE	1	2	1	79.4536				N	N	N
F9	crt1 ko	y45	UNKNOWN	SYBR	None	0.34247	0.181309	0.64688	18.8404	19.2484	0.858053		-1.66025	0.38802			1.54595	TRUE	0.579849	TRUE	1	3	1	81.8365				Y	N	N
F10	4oe	crt	UNKNOWN	SYBR	None	0.0219889	0.019255	0.0251111	29.6622	29.6994	0.118504		11.778	0.0689894			5.50708	TRUE	0.289815	TRUE	3	24	1	73.3345	78.4059			N	N	Y
F11	4oe	cdc	UNKNOWN	SYBR	None	0.0260269	0.0224691	0.0301479	23.4238	23.7107	0.218592		5.78933	0.0896787			5.26385	TRUE	1.01068	TRUE	3	16	1	79.6098				N	N	N
F12	4oe	y45	UNKNOWN	SYBR	None	0.0173684	0.0163104	0.018495	20.6399	20.5626	0.0913846		2.64119	0.0383453			5.84739	TRUE	0.579849	TRUE	3	13	1	81.5499				N	N	N
Analysis Type	Singleplex
Endogenous Control	fmo4
RQ Min/Max Confidence Level	95.0
Reference Sample	n2

## Sheet: Sheet1
atf6	Ct mean	Ct SD	Geo Mean
cdc-42			#NUM!	#NUM!
Y45F10D.4
fmo-4
										Worm Strain	Primer	Fold Change
										FMO-4 OE hyp sp	fmo-4	47.7099
N2
cdc-42			#NUM!	#NUM!		fmo-4
Y45F10D.4
fmo-4							Geo Mean Fold Change
					fmo-4	#NUM!	#NUM!
CRT1	Ct mean	Ct SD	Geo Mean
cdc-42			#NUM!	#NUM!
Y45F10D.4
fmo4
N2
cdc-42			#NUM!	#NUM!		fmo-4
Y45F10D.4
fmo4							Geo Mean Fold Change
					fmo-4	#NUM!	#NUM!
4OE hyp sp	Ct mean	Ct SD	Geo Mean
cdc-42	23.7107	0.218592	22.0806	0.141336
Y45F10D.4	20.5626	0.0913846
fmo-4	17.9214	0.0153462
N2
cdc-42	24.62	0.161155	22.6775	0.168792		fmo-4
Y45F10D.4	20.8883	0.31083
fmo-4	24.0945	0.0960042					Geo Mean Fold Change
					fmo-4	-5.57622	47.7099
CRT-1	Ct mean	Ct SD	Geo Mean
cdc-42			#NUM!	#NUM!
Y45F10D.4
crt-1
N2
cdc-42			#NUM!	#NUM!		fmo-4
Y45F10D.4
crt-1							Geo Mean Fold Change
					crt1	#NUM!	#NUM!
							Primer is not working
4OE	Ct mean	Ct SD	Geo Mean
cdc-42			#NUM!	#NUM!
Y45F10D.4
crt-1
N2
cdc-42			#NUM!	#NUM!		fmo-4
Y45F10D.4
crt-1							Geo Mean Fold Change
					crt1	#NUM!	#NUM!
atf6 KO	Ct mean	Ct SD	Geo Mean
cdc-42			#NUM!	#NUM!
Y45F10D.4
crt-1
N2
cdc-42			#NUM!	#NUM!		fmo-4
Y45F10D.4
crt-1							Geo Mean Fold Change
					crt1	#NUM!	#NUM!
