# Supplementary material for: fmo-4 promotes longevity and stress resistance via ER to mitochondria calcium regulation in C. elegans
Source: eLife journal article supplement (doi:10.7554/elife.99971), 2024-08-27
Supplement: supp7 [file 10OCT2023 fmo2 fmo4 tuckowski_data 4KO.xls]

## Sheet: Results
Block Type	96well
Chemistry	SYBR_GREEN
Experiment File Name	C:\Applied Biosystems\StepOne Software v2.3\experiments\Tuckowski\021120_Hyo Primers_1.eds
Experiment Run End Time	2023-10-10 10:36:24 AM EDT
Instrument Type	steponeplus
Passive Reference	ROX
Well	Sample Name	Target Name	Task	Reporter	Quencher	RQ	RQ Min	RQ Max	Cт	Cт Mean	Cт SD	ΔCт	ΔCт Mean	ΔCт SE	HK Control ΔCт Mean	HK Control ΔCт SE	ΔΔCт	Automatic Ct Threshold	Ct Threshold	Automatic Baseline	Baseline Start	Baseline End	Efficiency	Tm1	Tm2	Tm3	Comments	HIGHSD	OUTLIERRG
A1	N2	fmo4	UNKNOWN	SYBR	None				20.8938	20.6942	0.229041							TRUE	0.0767877	TRUE	3	17	1	77.3447				N	N
A2	N2	cdc	UNKNOWN	SYBR	None	1	0.802205	1.24656	22.8076	22.9146	0.0597018		2.22045	0.134464			0	TRUE	0.399148	TRUE	3	17	1	79.7337				N	N
A3	N2	y45	UNKNOWN	SYBR	None	1	0.797809	1.25343	20.5302	20.7209	0.0950837		0.0267137	0.137817			0	TRUE	0.617688	TRUE	3	14	1	81.5259				N	N
A4	C9	fmo4	UNKNOWN	SYBR	None				20.3549	20.367	0.105605							TRUE	0.0767877	TRUE	3	16	1	77.045				N	N
A5	C9	cdc	UNKNOWN	SYBR	None	0.64073	0.351607	1.1676	22.9719	23.2296	0.884303		2.86266	0.366128			0.642211	TRUE	0.399148	TRUE	3	17	1	79.8818				Y	N
A6	C9	y45	UNKNOWN	SYBR	None	0.831391	0.746749	0.925626	20.7515	20.6601	0.0586819		0.293115	0.0655086			0.266401	TRUE	0.617688	TRUE	3	14	1	81.8225				N	N
A7	4ko	fmo4	UNKNOWN	SYBR	None				34.4646	35.423	1.44164							TRUE	0.0767877	TRUE	3	31	1	81.3715				Y	N
A8	4ko	cdc	UNKNOWN	SYBR	None	22526.2	5746.22	88306.7	23.348	23.1842	0.108115		-12.2389	0.833502			-14.4593	TRUE	0.399148	TRUE	3	18	1	79.5798				N	N
A9	4ko	y45	UNKNOWN	SYBR	None	25086.5	6408.81	98197.9	20.9033	20.8351	0.0515624		-14.5879	0.832598			-14.6146	TRUE	0.617688	TRUE	3	14	1	81.6725				N	N
A10	2o4k	fmo4	UNKNOWN	SYBR	None				20.3989	20.3171	0.102628							TRUE	0.0767877	TRUE	3	16	1	77.3439				N	N
A11	2o4k	cdc	UNKNOWN	SYBR	None	0.736234	0.656908	0.825139	23.1546	22.9793	0.0892352		2.66221	0.0695555			0.441764	TRUE	0.399148	TRUE	3	17	1	79.2878				N	N
A12	2o4k	y45	UNKNOWN	SYBR	None	0.873962	0.731168	1.04464	20.3404	20.5382	0.223636		0.221072	0.108841			0.194358	TRUE	0.617688	TRUE	3	14	1	81.5285				N	N
B1	N2	fmo4	UNKNOWN	SYBR	None				20.7446	20.6942	0.229041							TRUE	0.0767877	TRUE	3	17	1	77.3447				N	N
B2	N2	cdc	UNKNOWN	SYBR	None	1	0.802205	1.24656	22.8832	22.9146	0.0597018		2.22045	0.134464			0	TRUE	0.399148	TRUE	3	17	1	79.5844				N	N
B3	N2	y45	UNKNOWN	SYBR	None	1	0.797809	1.25343	20.7552	20.7209	0.0950837		0.0267137	0.137817			0	TRUE	0.617688	TRUE	3	14	1	81.5259				N	N
B4	C9	fmo4	UNKNOWN	SYBR	None				20.4781	20.367	0.105605							TRUE	0.0767877	TRUE	3	17	1	77.045				N	N
B5	C9	cdc	UNKNOWN	SYBR	None	0.64073	0.351607	1.1676	22.9978	23.2296	0.884303		2.86266	0.366128			0.642211	TRUE	0.399148	TRUE	3	17	1	79.7325				Y	N
B6	C9	y45	UNKNOWN	SYBR	None	0.831391	0.746749	0.925626	20.6548	20.6601	0.0586819		0.293115	0.0655086			0.266401	TRUE	0.617688	TRUE	3	14	1	81.8225				N	N
B7	4ko	fmo4	UNKNOWN	SYBR	None				34.7235	35.423	1.44164							TRUE	0.0767877	TRUE	3	31	1	78.9826				Y	N
B8	4ko	cdc	UNKNOWN	SYBR	None	22526.2	5746.22	88306.7	23.08	23.1842	0.108115		-12.2389	0.833502			-14.4593	TRUE	0.399148	TRUE	3	17	1	79.4305				N	N
B9	4ko	y45	UNKNOWN	SYBR	None	25086.5	6408.81	98197.9	20.8341	20.8351	0.0515624		-14.5879	0.832598			-14.6146	TRUE	0.617688	TRUE	3	14	1	81.6725				N	N
B10	2o4k	fmo4	UNKNOWN	SYBR	None				20.3505	20.3171	0.102628							TRUE	0.0767877	TRUE	3	16	1	77.1946				N	N
B11	2o4k	cdc	UNKNOWN	SYBR	None	0.736234	0.656908	0.825139	22.9344	22.9793	0.0892352		2.66221	0.0695555			0.441764	TRUE	0.399148	TRUE	3	17	1	79.2878				N	N
B12	2o4k	y45	UNKNOWN	SYBR	None	0.873962	0.731168	1.04464	20.5247	20.5382	0.223636		0.221072	0.108841			0.194358	TRUE	0.617688	TRUE	3	14	1	81.5285				N	N
C1	N2	fmo4	UNKNOWN	SYBR	None				20.4441	20.6942	0.229041							TRUE	0.0767877	TRUE	3	17	1	77.1954				N	N
C2	N2	cdc	UNKNOWN	SYBR	None	1	0.802205	1.24656	22.9284	22.9146	0.0597018		2.22045	0.134464			0	TRUE	0.399148	TRUE	3	17	1	79.5844				N	N
C3	N2	y45	UNKNOWN	SYBR	None	1	0.797809	1.25343	20.742	20.7209	0.0950837		0.0267137	0.137817			0	TRUE	0.617688	TRUE	3	14	1	81.3766				N	N
C4	C9	fmo4	UNKNOWN	SYBR	None				20.2679	20.367	0.105605							TRUE	0.0767877	TRUE	3	16	1	77.045				N	N
C5	C9	cdc	UNKNOWN	SYBR	None	0.64073	0.351607	1.1676	22.3234	23.2296	0.884303		2.86266	0.366128			0.642211	TRUE	0.399148	TRUE	3	16	1	79.8818				Y	N
C6	C9	y45	UNKNOWN	SYBR	None	0.831391	0.746749	0.925626	20.6846	20.6601	0.0586819		0.293115	0.0655086			0.266401	TRUE	0.617688	TRUE	3	14	1	81.6732				N	N
C7	4ko	fmo4	UNKNOWN	SYBR	None				37.081	35.423	1.44164							TRUE	0.0767877	TRUE	3	33	1	81.2222				Y	N
C8	4ko	cdc	UNKNOWN	SYBR	None	22526.2	5746.22	88306.7	23.1849	23.1842	0.108115		-12.2389	0.833502			-14.4593	TRUE	0.399148	TRUE	3	17	1	79.4305				N	N
C9	4ko	y45	UNKNOWN	SYBR	None	25086.5	6408.81	98197.9	20.7982	20.8351	0.0515624		-14.5879	0.832598			-14.6146	TRUE	0.617688	TRUE	3	14	1	81.6725				N	N
C10	2o4k	fmo4	UNKNOWN	SYBR	None				20.202	20.3171	0.102628							TRUE	0.0767877	TRUE	3	16	1	77.1946				N	N
C11	2o4k	cdc	UNKNOWN	SYBR	None	0.736234	0.656908	0.825139	22.9891	22.9793	0.0892352		2.66221	0.0695555			0.441764	TRUE	0.399148	TRUE	3	17	1	79.2878				N	N
C12	2o4k	y45	UNKNOWN	SYBR	None	0.873962	0.731168	1.04464	20.3168	20.5382	0.223636		0.221072	0.108841			0.194358	TRUE	0.617688	TRUE	3	13	1	81.3791				N	N
D1	N2	fmo2	UNKNOWN	SYBR	None	1	0.77419	1.29167	28.5491	28.5208	0.0244842		7.82664	0.13299			0	TRUE	0.235372	TRUE	3	23	1	77.6433				N	N
D2	N2	cdc	UNKNOWN	SYBR	None	1	0.802205	1.24656	22.9596	22.9146	0.0597018		2.22045	0.134464			0	TRUE	0.399148	TRUE	3	17	1	79.5844				N	N
D3	N2	y45	UNKNOWN	SYBR	None	1	0.797809	1.25343	20.7445	20.7209	0.0950837		0.0267137	0.137817			0	TRUE	0.617688	TRUE	3	14	1	81.3766				N	N
D4	C9	fmo2	UNKNOWN	SYBR	None	65.4647	31.3362	136.763	21.7662	22.1609	0.654604		1.79399	0.382823			-6.03265	TRUE	0.235372	TRUE	3	16	1	77.4931				Y	N
D5	C9	cdc	UNKNOWN	SYBR	None	0.64073	0.351607	1.1676	23.0845	23.2296	0.884303		2.86266	0.366128			0.642211	TRUE	0.399148	TRUE	3	17	1	79.5832				Y	N
D6	C9	y45	UNKNOWN	SYBR	None	0.831391	0.746749	0.925626	20.5794	20.6601	0.0586819		0.293115	0.0655086			0.266401	TRUE	0.617688	TRUE	3	14	1	81.6732				N	N
D7	4ko	fmo2	UNKNOWN	SYBR	None	17582.5	3483.31	88749.7	29.0977	29.1478	0.211263		-6.27521	0.841222			-14.1018	TRUE	0.235372	TRUE	3	24	1	77.4895				N	N
D8	4ko	cdc	UNKNOWN	SYBR	None	22526.2	5746.22	88306.7	23.1377	23.1842	0.108115		-12.2389	0.833502			-14.4593	TRUE	0.399148	TRUE	3	17	1	79.4305				N	N
D9	4ko	y45	UNKNOWN	SYBR	None	25086.5	6408.81	98197.9	20.7846	20.8351	0.0515624		-14.5879	0.832598			-14.6146	TRUE	0.617688	TRUE	3	14	1	81.6725				N	N
D10	2o4k	fmo2	UNKNOWN	SYBR	None	108.465	94.7345	124.185	21.3128	21.3827	0.0656213		1.06555	0.0703293			-6.76108	TRUE	0.235372	TRUE	3	16	1	77.6424				N	N
D11	2o4k	cdc	UNKNOWN	SYBR	None	0.736234	0.656908	0.825139	22.9151	22.9793	0.0892352		2.66221	0.0695555			0.441764	TRUE	0.399148	TRUE	3	16	1	79.2878				N	N
D12	2o4k	y45	UNKNOWN	SYBR	None	0.873962	0.731168	1.04464	20.647	20.5382	0.223636		0.221072	0.108841			0.194358	TRUE	0.617688	TRUE	3	14	1	81.3791				N	N
E1	N2	fmo2	UNKNOWN	SYBR	None	1	0.77419	1.29167	28.5074	28.5208	0.0244842		7.82664	0.13299			0	TRUE	0.235372	TRUE	3	23	1	77.6433				N	N
E2	N2	cdc	UNKNOWN	SYBR	None	1	0.802205	1.24656	22.9525	22.9146	0.0597018		2.22045	0.134464			0	TRUE	0.399148	TRUE	3	17	1	79.4351				N	N
E3	N2	y45	UNKNOWN	SYBR	None	1	0.797809	1.25343	20.7914	20.7209	0.0950837		0.0267137	0.137817			0	TRUE	0.617688	TRUE	3	14	1	81.3766				N	N
E4	C9	fmo2	UNKNOWN	SYBR	None	65.4647	31.3362	136.763	21.8001	22.1609	0.654604		1.79399	0.382823			-6.03265	TRUE	0.235372	TRUE	3	16	1	77.4931				Y	N
E5	C9	cdc	UNKNOWN	SYBR	None	0.64073	0.351607	1.1676	24.9382	23.2296	0.884303		2.86266	0.366128			0.642211	TRUE	0.399148	TRUE	3	19	1	79.4339				Y	Y
E6	C9	y45	UNKNOWN	SYBR	None	0.831391	0.746749	0.925626	20.6199	20.6601	0.0586819		0.293115	0.0655086			0.266401	TRUE	0.617688	TRUE	3	13	1	81.6732				N	N
E7	4ko	fmo2	UNKNOWN	SYBR	None	17582.5	3483.31	88749.7	29.3796	29.1478	0.211263		-6.27521	0.841222			-14.1018	TRUE	0.235372	TRUE	3	24	1	77.4895				N	N
E8	4ko	cdc	UNKNOWN	SYBR	None	22526.2	5746.22	88306.7	23.0811	23.1842	0.108115		-12.2389	0.833502			-14.4593	TRUE	0.399148	TRUE	3	17	1	79.4305				N	N
E9	4ko	y45	UNKNOWN	SYBR	None	25086.5	6408.81	98197.9	20.7977	20.8351	0.0515624		-14.5879	0.832598			-14.6146	TRUE	0.617688	TRUE	3	14	1	81.6725				N	N
E10	2o4k	fmo2	UNKNOWN	SYBR	None	108.465	94.7345	124.185	21.443	21.3827	0.0656213		1.06555	0.0703293			-6.76108	TRUE	0.235372	TRUE	3	16	1	77.6424				N	N
E11	2o4k	cdc	UNKNOWN	SYBR	None	0.736234	0.656908	0.825139	22.9423	22.9793	0.0892352		2.66221	0.0695555			0.441764	TRUE	0.399148	TRUE	3	17	1	79.4372				N	N
E12	2o4k	y45	UNKNOWN	SYBR	None	0.873962	0.731168	1.04464	20.9209	20.5382	0.223636		0.221072	0.108841			0.194358	TRUE	0.617688	TRUE	3	14	1	81.3791				N	N
F1	N2	fmo2	UNKNOWN	SYBR	None	1	0.77419	1.29167	28.5059	28.5208	0.0244842		7.82664	0.13299			0	TRUE	0.235372	TRUE	3	23	1	77.6433				N	N
F2	N2	cdc	UNKNOWN	SYBR	None	1	0.802205	1.24656	22.9563	22.9146	0.0597018		2.22045	0.134464			0	TRUE	0.399148	TRUE	3	17	1	79.4351				N	N
F3	N2	y45	UNKNOWN	SYBR	None	1	0.797809	1.25343	20.7621	20.7209	0.0950837		0.0267137	0.137817			0	TRUE	0.617688	TRUE	3	14	1	81.5259				N	N
F4	C9	fmo2	UNKNOWN	SYBR	None	65.4647	31.3362	136.763	22.9166	22.1609	0.654604		1.79399	0.382823			-6.03265	TRUE	0.235372	TRUE	3	17	1	77.4931				Y	Y
F5	C9	cdc	UNKNOWN	SYBR	None	0.64073	0.351607	1.1676	23.0619	23.2296	0.884303		2.86266	0.366128			0.642211	TRUE	0.399148	TRUE	3	17	1	79.5832				Y	N
F6	C9	y45	UNKNOWN	SYBR	None	0.831391	0.746749	0.925626	20.6703	20.6601	0.0586819		0.293115	0.0655086			0.266401	TRUE	0.617688	TRUE	3	14	1	81.6732				N	N
F7	4ko	fmo2	UNKNOWN	SYBR	None	17582.5	3483.31	88749.7	28.9661	29.1478	0.211263		-6.27521	0.841222			-14.1018	TRUE	0.235372	TRUE	3	24	1	77.4895				N	N
F8	4ko	cdc	UNKNOWN	SYBR	None	22526.2	5746.22	88306.7	23.2734	23.1842	0.108115		-12.2389	0.833502			-14.4593	TRUE	0.399148	TRUE	3	17	1	79.4305				N	N
F9	4ko	y45	UNKNOWN	SYBR	None	25086.5	6408.81	98197.9	20.8929	20.8351	0.0515624		-14.5879	0.832598			-14.6146	TRUE	0.617688	TRUE	3	14	1	81.6725				N	N
F10	2o4k	fmo2	UNKNOWN	SYBR	None	108.465	94.7345	124.185	21.3923	21.3827	0.0656213		1.06555	0.0703293			-6.76108	TRUE	0.235372	TRUE	3	16	1	77.6424				N	N
F11	2o4k	cdc	UNKNOWN	SYBR	None	0.736234	0.656908	0.825139	22.9406	22.9793	0.0892352		2.66221	0.0695555			0.441764	TRUE	0.399148	TRUE	3	17	1	79.4372				N	N
F12	2o4k	y45	UNKNOWN	SYBR	None	0.873962	0.731168	1.04464	20.4795	20.5382	0.223636		0.221072	0.108841			0.194358	TRUE	0.617688	TRUE	3	14	1	81.5285				N	N
Analysis Type	Singleplex
Endogenous Control	fmo4
RQ Min/Max Confidence Level	95.0
Reference Sample	N2

## Sheet: Sheet1
C9	Ct mean	Ct SD	Geo Mean
cdc-42	23.2296	0.884303	21.9072	0.0753437
Y45F10D.4	20.6601	0.0586819
fmo-2	22.1609	0.654604
										Worm Strain	Primer	Fold Change
										FMO-2 OE	fmo2	89.072
											fmo4	1.36061
										FMO-2OE;4OE	fmo2	134.594
											fmo4	1.2409
N2										fmo-4 KO	fmo2	0.74
cdc-42	22.9146	0.0597018	21.7902	0.0517996		fmo-2					fmo4	4.19567e-05
Y45F10D.4	20.7209	0.0950837
fmo-2	28.5208	0.0244842					Geo Mean Fold Change
					fmo-2	-6.4769	89.072
C9	Ct mean	Ct SD	Geo Mean
cdc-42	23.2296	0.884303	21.9072	0.227799
Y45F10D.4	20.6601	0.0586819
fmo-4	20.367	0.105605
N2
cdc-42	22.9146	0.0597018	21.7902	0.109145		fmo-4
Y45F10D.4	20.7209	0.0950837
fmo-4	20.6942	0.229041					Geo Mean Fold Change
					fmo-4	-0.444256	1.36061
4KO	Ct mean	Ct SD	Geo Mean
cdc-42	23.1842	0.108115	21.9783	0.0746638
Y45F10D.4	20.8351	0.0515624
fmo-2	29.1478	0.211263
N2
cdc-42	22.9146	0.0597018	21.7902	0.0517996		fmo-2
Y45F10D.4	20.7209	0.0950837
fmo-2	28.5208	0.0244842					Geo Mean Fold Change
					fmo-2	0.438891	0.737701
4KO	Ct mean	Ct SD	Geo Mean
cdc-42	23.1842	0.108115	21.9783	0.200305
Y45F10D.4	20.8351	0.0515624
fmo-4	35.423	1.44164
N2
cdc-42	22.9146	0.0597018	21.7902	0.109145		fmo-4
Y45F10D.4	20.7209	0.0950837
fmo-4	20.6942	0.229041					Geo Mean Fold Change
					fmo-4	14.5407	4.19567e-05
2O4O	Ct mean	Ct SD	Geo Mean
cdc-42	22.9793	0.0892352	21.7245	0.109406
Y45F10D.4	20.5382	0.223636
fmo-2	21.3827	0.0656213
N2
cdc-42	22.9146	0.0597018	21.7902	0.0517996		fmo-2
Y45F10D.4	20.7209	0.0950837
fmo-2	28.5208	0.0244842					Geo Mean Fold Change
					fmo-2	-7.07247	134.594
2O4O	Ct mean	Ct SD	Geo Mean
cdc-42	22.9793	0.0892352	21.7245	0.126993
Y45F10D.4	20.5382	0.223636
fmo-4	20.3171	0.102628
N2
cdc-42	22.9146	0.0597018	21.7902	0.0753437		fmo-4
Y45F10D.4	20.7209	0.0950837
fmo-4	20.6942	0.229041					Geo Mean Fold Change
					fmo-4	-0.311388	1.2409
