# Supplementary material for: fmo-4 promotes longevity and stress resistance via ER to mitochondria calcium regulation in C. elegans
Source: eLife journal article supplement (doi:10.7554/elife.99971), 2024-08-27
Supplement: supp7 [file 12oct2023 tuckowski fmo2 and fmo4 levels_data.xls]

## Sheet: Results
Block Type	96well
Chemistry	SYBR_GREEN
Experiment File Name	C:\Applied Biosystems\StepOne Software v2.3\experiments\Tuckowski\12oct2023 tuckowski fmo2 and fmo4 levels.eds
Experiment Run End Time	2023-10-12 12:02:12 PM EDT
Instrument Type	steponeplus
Passive Reference	ROX
Well	Sample Name	Target Name	Task	Reporter	Quencher	RQ	RQ Min	RQ Max	Cт	Cт Mean	Cт SD	ΔCт	ΔCт Mean	ΔCт SE	HK Control ΔCт Mean	HK Control ΔCт SE	ΔΔCт	Automatic Ct Threshold	Ct Threshold	Automatic Baseline	Baseline Start	Baseline End	Efficiency	Tm1	Tm2	Tm3	Comments	HIGHSD	MTP
A1	n2	fmo4	UNKNOWN	SYBR	None				22.0875	21.9443	0.16181							TRUE	0.183521	TRUE	3	17	1	77.3747				N	N
A2	n2	cdc	UNKNOWN	SYBR	None	1	0.85151	1.17438	23.7577	23.89	0.0731076		1.94578	0.0980727			0	TRUE	0.662152	TRUE	3	17	1	79.6114				N	N
A3	n2	y45	UNKNOWN	SYBR	None	1	0.846771	1.18096	20.5997	20.727	0.0970661		-1.21731	0.101478			0	TRUE	0.602523	TRUE	3	14	1	81.5522				N	N
A4	c9	fmo4	UNKNOWN	SYBR	None				21.882	21.7438	0.122558							TRUE	0.183521	TRUE	3	17	1	77.0801				N	N
A5	c9	cdc	UNKNOWN	SYBR	None	0.849266	0.7554	0.954796	23.8964	23.9253	0.0244551		2.18149	0.0714599			0.235711	TRUE	0.662152	TRUE	3	17	1	79.7551				N	N
A6	c9	y45	UNKNOWN	SYBR	None	0.893308	0.773021	1.03231	20.7369	20.6892	0.129132		-1.05454	0.0882384			0.162771	TRUE	0.602523	TRUE	3	14	1	81.8421				N	N
A7	2ko	fmo4	UNKNOWN	SYBR	None				21.5512	21.57	0.0290551							TRUE	0.183521	TRUE	3	16	1	77.2217				N	N
A8	2ko	cdc	UNKNOWN	SYBR	None	1.11759	1.05647	1.18224	23.3969	23.3554	0.0733235		1.78539	0.0343141			-0.160388	TRUE	0.662152	TRUE	3	16	1	79.6072				N	N
A9	2ko	y45	UNKNOWN	SYBR	None	1.06291	1.01299	1.11528	20.3308	20.2646	0.0589814		-1.30532	0.0293462			-0.0880184	TRUE	0.602523	TRUE	3	13	1	81.8422				N	N
A10	2o4o	fmo4	UNKNOWN	SYBR	None				37.0005	36.6004	0.403579							TRUE	0.183521	TRUE	3	32	1	81.395	64.9973			N	Y
A11	2o4o	cdc	UNKNOWN	SYBR	None	26005.4	17742.9	38115.6	23.8475	23.8797	0.0265566		-12.7207	0.233259			-14.6665	TRUE	0.662152	TRUE	3	17	1	79.4697				N	N
A12	2o4o	y45	UNKNOWN	SYBR	None	30833.3	20991.4	45289.5	20.4472	20.4709	0.0663974		-16.1295	0.234578			-14.9122	TRUE	0.602523	TRUE	3	13	1	81.5571				N	N
B1	n2	fmo4	UNKNOWN	SYBR	None				21.9766	21.9443	0.16181							TRUE	0.183521	TRUE	3	17	1	77.2256				N	N
B2	n2	cdc	UNKNOWN	SYBR	None	1	0.85151	1.17438	23.9067	23.89	0.0731076		1.94578	0.0980727			0	TRUE	0.662152	TRUE	3	17	1	79.6114				N	N
B3	n2	y45	UNKNOWN	SYBR	None	1	0.846771	1.18096	20.8744	20.727	0.0970661		-1.21731	0.101478			0	TRUE	0.602523	TRUE	3	14	1	81.5522				N	N
B4	c9	fmo4	UNKNOWN	SYBR	None				21.701	21.7438	0.122558							TRUE	0.183521	TRUE	3	17	1	77.0801				N	N
B5	c9	cdc	UNKNOWN	SYBR	None	0.849266	0.7554	0.954796	23.9578	23.9253	0.0244551		2.18149	0.0714599			0.235711	TRUE	0.662152	TRUE	3	17	1	79.7551				N	N
B6	c9	y45	UNKNOWN	SYBR	None	0.893308	0.773021	1.03231	20.9305	20.6892	0.129132		-1.05454	0.0882384			0.162771	TRUE	0.602523	TRUE	3	14	1	81.8421				N	N
B7	2ko	fmo4	UNKNOWN	SYBR	None				21.5553	21.57	0.0290551							TRUE	0.183521	TRUE	3	17	1	77.2217				N	N
B8	2ko	cdc	UNKNOWN	SYBR	None	1.11759	1.05647	1.18224	23.3195	23.3554	0.0733235		1.78539	0.0343141			-0.160388	TRUE	0.662152	TRUE	3	16	1	79.4581				N	N
B9	2ko	y45	UNKNOWN	SYBR	None	1.06291	1.01299	1.11528	20.2449	20.2646	0.0589814		-1.30532	0.0293462			-0.0880184	TRUE	0.602523	TRUE	3	13	1	81.6931				N	N
B10	2o4o	fmo4	UNKNOWN	SYBR	None				36.1934	36.6004	0.403579							TRUE	0.183521	TRUE	3	31	1	81.395				N	N
B11	2o4o	cdc	UNKNOWN	SYBR	None	26005.4	17742.9	38115.6	23.8661	23.8797	0.0265566		-12.7207	0.233259			-14.6665	TRUE	0.662152	TRUE	3	17	1	79.3206				N	N
B12	2o4o	y45	UNKNOWN	SYBR	None	30833.3	20991.4	45289.5	20.4715	20.4709	0.0663974		-16.1295	0.234578			-14.9122	TRUE	0.602523	TRUE	3	13	1	81.5571				N	N
C1	n2	fmo4	UNKNOWN	SYBR	None				21.7687	21.9443	0.16181							TRUE	0.183521	TRUE	3	17	1	77.2256				N	N
C2	n2	cdc	UNKNOWN	SYBR	None	1	0.85151	1.17438	23.8979	23.89	0.0731076		1.94578	0.0980727			0	TRUE	0.662152	TRUE	3	17	1	79.4623				N	N
C3	n2	y45	UNKNOWN	SYBR	None	1	0.846771	1.18096	20.6673	20.727	0.0970661		-1.21731	0.101478			0	TRUE	0.602523	TRUE	3	14	1	81.5522				N	N
C4	c9	fmo4	UNKNOWN	SYBR	None				21.6483	21.7438	0.122558							TRUE	0.183521	TRUE	3	17	1	77.0801				N	N
C5	c9	cdc	UNKNOWN	SYBR	None	0.849266	0.7554	0.954796	23.9084	23.9253	0.0244551		2.18149	0.0714599			0.235711	TRUE	0.662152	TRUE	3	17	1	79.7551				N	N
C6	c9	y45	UNKNOWN	SYBR	None	0.893308	0.773021	1.03231	20.5887	20.6892	0.129132		-1.05454	0.0882384			0.162771	TRUE	0.602523	TRUE	3	13	1	81.8421				N	N
C7	2ko	fmo4	UNKNOWN	SYBR	None				21.6034	21.57	0.0290551							TRUE	0.183521	TRUE	3	17	1	77.0726				N	N
C8	2ko	cdc	UNKNOWN	SYBR	None	1.11759	1.05647	1.18224	23.449	23.3554	0.0733235		1.78539	0.0343141			-0.160388	TRUE	0.662152	TRUE	3	17	1	79.4581				N	N
C9	2ko	y45	UNKNOWN	SYBR	None	1.06291	1.01299	1.11528	20.1996	20.2646	0.0589814		-1.30532	0.0293462			-0.0880184	TRUE	0.602523	TRUE	3	14	1	81.6931				N	N
C10	2o4o	fmo4	UNKNOWN	SYBR	None				36.6074	36.6004	0.403579							TRUE	0.183521	TRUE	3	31	1	81.2459	67.9787	79.1589		N	Y
C11	2o4o	cdc	UNKNOWN	SYBR	None	26005.4	17742.9	38115.6	23.906	23.8797	0.0265566		-12.7207	0.233259			-14.6665	TRUE	0.662152	TRUE	3	17	1	79.3206				N	N
C12	2o4o	y45	UNKNOWN	SYBR	None	30833.3	20991.4	45289.5	20.3506	20.4709	0.0663974		-16.1295	0.234578			-14.9122	TRUE	0.602523	TRUE	3	14	1	81.5571				N	N
D1	n2	fmo2	UNKNOWN	SYBR	None	1	0.697696	1.43329	28.447	28.7614	0.280675		6.81717	0.187048			0	TRUE	0.239292	TRUE	3	23	1	77.6729				N	N
D2	n2	cdc	UNKNOWN	SYBR	None	1	0.85151	1.17438	23.9556	23.89	0.0731076		1.94578	0.0980727			0	TRUE	0.662152	TRUE	3	17	1	79.4623				N	N
D3	n2	y45	UNKNOWN	SYBR	None	1	0.846771	1.18096	20.7025	20.727	0.0970661		-1.21731	0.101478			0	TRUE	0.602523	TRUE	3	14	1	81.5522				N	N
D4	c9	fmo2	UNKNOWN	SYBR	None	84.3545	40.6131	175.206	21.8272	22.1626	0.646331		0.418783	0.379809			-6.39839	TRUE	0.239292	TRUE	3	16	1	77.5273				Y	N
D5	c9	cdc	UNKNOWN	SYBR	None	0.849266	0.7554	0.954796	23.9304	23.9253	0.0244551		2.18149	0.0714599			0.235711	TRUE	0.662152	TRUE	3	17	1	79.6061				N	N
D6	c9	y45	UNKNOWN	SYBR	None	0.893308	0.773021	1.03231	20.6054	20.6892	0.129132		-1.05454	0.0882384			0.162771	TRUE	0.602523	TRUE	3	14	1	81.693				N	N
D7	2ko	fmo2	UNKNOWN	SYBR	None	0.0122956	0.00658754	0.0229497	34.993	34.7329	0.560909		13.1629	0.324275			6.34571	TRUE	0.239292	TRUE	3	30	1	77.3708				Y	N
D8	2ko	cdc	UNKNOWN	SYBR	None	1.11759	1.05647	1.18224	23.2852	23.3554	0.0733235		1.78539	0.0343141			-0.160388	TRUE	0.662152	TRUE	3	16	1	79.4581				N	N
D9	2ko	y45	UNKNOWN	SYBR	None	1.06291	1.01299	1.11528	20.2214	20.2646	0.0589814		-1.30532	0.0293462			-0.0880184	TRUE	0.602523	TRUE	3	14	1	81.6931				N	N
D10	2o4o	fmo2	UNKNOWN	SYBR	None	3472288	2.21735e+06	5437480	21.6845	21.6902	0.00782691		-14.9103	0.23305			-21.7275	TRUE	0.239292	TRUE	3	16	1	77.6682				N	N
D11	2o4o	cdc	UNKNOWN	SYBR	None	26005.4	17742.9	38115.6	23.8874	23.8797	0.0265566		-12.7207	0.233259			-14.6665	TRUE	0.662152	TRUE	3	17	1	79.3206				N	N
D12	2o4o	y45	UNKNOWN	SYBR	None	30833.3	20991.4	45289.5	20.5172	20.4709	0.0663974		-16.1295	0.234578			-14.9122	TRUE	0.602523	TRUE	3	14	1	81.5571				N	N
E1	n2	fmo2	UNKNOWN	SYBR	None	1	0.697696	1.43329	28.8506	28.7614	0.280675		6.81717	0.187048			0	TRUE	0.239292	TRUE	3	23	1	77.6729				N	N
E2	n2	cdc	UNKNOWN	SYBR	None	1	0.85151	1.17438	23.9541	23.89	0.0731076		1.94578	0.0980727			0	TRUE	0.662152	TRUE	3	17	1	79.4623				N	N
E3	n2	y45	UNKNOWN	SYBR	None	1	0.846771	1.18096	20.7974	20.727	0.0970661		-1.21731	0.101478			0	TRUE	0.602523	TRUE	3	14	1	81.5522				N	N
E4	c9	fmo2	UNKNOWN	SYBR	None	84.3545	40.6131	175.206	21.7528	22.1626	0.646331		0.418783	0.379809			-6.39839	TRUE	0.239292	TRUE	3	16	1	77.5273				Y	N
E5	c9	cdc	UNKNOWN	SYBR	None	0.849266	0.7554	0.954796	23.9099	23.9253	0.0244551		2.18149	0.0714599			0.235711	TRUE	0.662152	TRUE	3	17	1	79.6061				N	N
E6	c9	y45	UNKNOWN	SYBR	None	0.893308	0.773021	1.03231	20.6241	20.6892	0.129132		-1.05454	0.0882384			0.162771	TRUE	0.602523	TRUE	3	14	1	81.693				N	N
E7	2ko	fmo2	UNKNOWN	SYBR	None	0.0122956	0.00658754	0.0229497	35.1164	34.7329	0.560909		13.1629	0.324275			6.34571	TRUE	0.239292	TRUE	3	30	1	77.3708				Y	N
E8	2ko	cdc	UNKNOWN	SYBR	None	1.11759	1.05647	1.18224	23.271	23.3554	0.0733235		1.78539	0.0343141			-0.160388	TRUE	0.662152	TRUE	3	17	1	79.4581				N	N
E9	2ko	y45	UNKNOWN	SYBR	None	1.06291	1.01299	1.11528	20.2476	20.2646	0.0589814		-1.30532	0.0293462			-0.0880184	TRUE	0.602523	TRUE	3	13	1	81.6931				N	N
E10	2o4o	fmo2	UNKNOWN	SYBR	None	3472288	2.21735e+06	5437480	21.6991	21.6902	0.00782691		-14.9103	0.23305			-21.7275	TRUE	0.239292	TRUE	3	16	1	77.6682				N	N
E11	2o4o	cdc	UNKNOWN	SYBR	None	26005.4	17742.9	38115.6	23.9129	23.8797	0.0265566		-12.7207	0.233259			-14.6665	TRUE	0.662152	TRUE	3	17	1	79.3206				N	N
E12	2o4o	y45	UNKNOWN	SYBR	None	30833.3	20991.4	45289.5	20.5273	20.4709	0.0663974		-16.1295	0.234578			-14.9122	TRUE	0.602523	TRUE	3	14	1	81.5571				N	N
F1	n2	fmo2	UNKNOWN	SYBR	None	1	0.697696	1.43329	28.9867	28.7614	0.280675		6.81717	0.187048			0	TRUE	0.239292	TRUE	3	23	1	77.6729				N	N
F2	n2	cdc	UNKNOWN	SYBR	None	1	0.85151	1.17438	23.8682	23.89	0.0731076		1.94578	0.0980727			0	TRUE	0.662152	TRUE	3	17	1	79.4623				N	N
F3	n2	y45	UNKNOWN	SYBR	None	1	0.846771	1.18096	20.7204	20.727	0.0970661		-1.21731	0.101478			0	TRUE	0.602523	TRUE	3	14	1	81.5522				N	N
F4	c9	fmo2	UNKNOWN	SYBR	None	84.3545	40.6131	175.206	22.9076	22.1626	0.646331		0.418783	0.379809			-6.39839	TRUE	0.239292	TRUE	3	17	1	77.5273				Y	N
F5	c9	cdc	UNKNOWN	SYBR	None	0.849266	0.7554	0.954796	23.9487	23.9253	0.0244551		2.18149	0.0714599			0.235711	TRUE	0.662152	TRUE	3	17	1	79.6061				N	N
F6	c9	y45	UNKNOWN	SYBR	None	0.893308	0.773021	1.03231	20.6499	20.6892	0.129132		-1.05454	0.0882384			0.162771	TRUE	0.602523	TRUE	3	13	1	81.693				N	N
F7	2ko	fmo2	UNKNOWN	SYBR	None	0.0122956	0.00658754	0.0229497	34.0891	34.7329	0.560909		13.1629	0.324275			6.34571	TRUE	0.239292	TRUE	3	29	1	77.3708				Y	N
F8	2ko	cdc	UNKNOWN	SYBR	None	1.11759	1.05647	1.18224	23.4106	23.3554	0.0733235		1.78539	0.0343141			-0.160388	TRUE	0.662152	TRUE	3	16	1	79.4581				N	N
F9	2ko	y45	UNKNOWN	SYBR	None	1.06291	1.01299	1.11528	20.3436	20.2646	0.0589814		-1.30532	0.0293462			-0.0880184	TRUE	0.602523	TRUE	3	14	1	81.6931				N	N
F10	2o4o	fmo2	UNKNOWN	SYBR	None	3472288	2.21735e+06	5437480	21.687	21.6902	0.00782691		-14.9103	0.23305			-21.7275	TRUE	0.239292	TRUE	3	16	1	77.6682				N	N
F11	2o4o	cdc	UNKNOWN	SYBR	None	26005.4	17742.9	38115.6	23.8584	23.8797	0.0265566		-12.7207	0.233259			-14.6665	TRUE	0.662152	TRUE	3	17	1	79.3206				N	N
F12	2o4o	y45	UNKNOWN	SYBR	None	30833.3	20991.4	45289.5	20.5119	20.4709	0.0663974		-16.1295	0.234578			-14.9122	TRUE	0.602523	TRUE	3	13	1	81.5571				N	N
Analysis Type	Singleplex
Endogenous Control	fmo4
RQ Min/Max Confidence Level	95.0
Reference Sample	n2

## Sheet: Sheet1
C9	Ct mean	Ct SD	Geo Mean
cdc-42	23.9253	0.0244551	22.2485	0.0842394
Y45F10D.4	20.6892	0.129132
fmo-2	22.1626	0.646331
										Worm Strain	Primer	Fold Change
										FMO-2 OE	fmo2	96.6708
											fmo4	1.14601
										FMO-2 KO	fmo2	0.0112916
											fmo4	0.918348
N2										FMO-2OE;4KO	fmo2	121.822
cdc-42	23.89	0.0731076	22.2524	0.125819		fmo-2					fmo4	3.5084e-05
Y45F10D.4	20.727	0.0970661
fmo-2	28.7614	0.280675					Geo Mean Fold Change
					fmo-2	-6.59501	96.6708
C9	Ct mean	Ct SD	Geo Mean
cdc-42	23.9253	0.0244551	22.2485	0.0561955
Y45F10D.4	20.6892	0.129132
fmo-4	21.7438	0.122558
N2
cdc-42	23.89	0.0731076	22.2524	0.104716		fmo-4
Y45F10D.4	20.727	0.0970661
fmo-4	21.9443	0.16181					Geo Mean Fold Change
					fmo-4	-0.196614	1.14601
2KO	Ct mean	Ct SD	Geo Mean
cdc-42	23.3554	0.0733235	21.7552	0.0657626
Y45F10D.4	20.2646	0.0589814
fmo-2	34.7329	0.560909
N2
cdc-42	23.89	0.0731076	22.2524	0.125819		fmo-2
Y45F10D.4	20.727	0.0970661
fmo-2	28.7614	0.280675					Geo Mean Fold Change
					fmo-2	6.4686	0.0112916
2KO	Ct mean	Ct SD	Geo Mean
cdc-42	23.3554	0.0733235	21.7552	0.0500872
Y45F10D.4	20.2646	0.0589814
fmo-4	21.57	0.0290551
N2
cdc-42	23.89	0.0731076	22.2524	0.104716		fmo-4
Y45F10D.4	20.727	0.0970661
fmo-4	21.9443	0.16181					Geo Mean Fold Change
					fmo-4	0.122886	0.918348
2O4K	Ct mean	Ct SD	Geo Mean
cdc-42	23.8797	0.0265566	22.1097	0.0239868
Y45F10D.4	20.4709	0.0663974
fmo-2	21.6902	0.00782691
N2
cdc-42	23.89	0.0731076	22.2524	0.125819		fmo-2
Y45F10D.4	20.727	0.0970661
fmo-2	28.7614	0.280675					Geo Mean Fold Change
					fmo-2	-6.92863	121.822
2O4K	Ct mean	Ct SD	Geo Mean
cdc-42	23.8797	0.0265566	22.1097	0.0892794
Y45F10D.4	20.4709	0.0663974
fmo-4	36.6004	0.403579
N2
cdc-42	23.89	0.0731076	22.2524	0.0842394		fmo-4
Y45F10D.4	20.727	0.0970661
fmo-4	21.9443	0.16181					Geo Mean Fold Change
					fmo-4	14.7988	3.5084e-05
