# Supplementary material for: fmo-4 promotes longevity and stress resistance via ER to mitochondria calcium regulation in C. elegans
Source: eLife journal article supplement (doi:10.7554/elife.99971), 2024-08-27
Supplement: supp7 [file 20mar2024 rep 1 fmo2 levels hif1 scl 2k 2kcrispr and 4 levels 2o4k_data.xls]

## Sheet: Results
Block Type	96well
Chemistry	SYBR_GREEN
Experiment File Name	C:\Applied Biosystems\StepOne Software v2.3\experiments\Tuckowski\20mar2024 fmo2 levels hif1 scl 2k 2kcrispr and 4 levels 2o4k.eds
Experiment Run End Time	2024-03-20 10:09:07 AM EDT
Instrument Type	steponeplus
Passive Reference	ROX
Well	Sample Name	Target Name	Task	Reporter	Quencher	RQ	RQ Min	RQ Max	Cт	Cт Mean	Cт SD	ΔCт	ΔCт Mean	ΔCт SE	HK Control ΔCт Mean	HK Control ΔCт SE	ΔΔCт	Automatic Ct Threshold	Ct Threshold	Automatic Baseline	Baseline Start	Baseline End	Efficiency	Tm1	Tm2	Tm3	Comments	HIGHSD	OUTLIERRG	MTP
A1	n2	fmo2	UNKNOWN	SYBR	None				27.1538	27.0023	0.138307							TRUE	0.362712	TRUE	3	21	1	77.827				N	N	N
A2	n2	cdc	UNKNOWN	SYBR	None	1	0.838206	1.19302	23.441	23.6391	0.176954		-3.36324	0.10768			0	TRUE	0.936013	TRUE	3	16	1	79.7653				N	N	N
A3	n2	y45	UNKNOWN	SYBR	None	1	0.868727	1.15111	20.5113	20.6345	0.0772889		-6.36786	0.0858596			0	TRUE	0.729935	TRUE	3	13	1	81.716				N	N	N
A4	2ko	fmo2	UNKNOWN	SYBR	None				31.9279	31.91	0.0856565							TRUE	0.362712	TRUE	3	26	1	77.6908				N	N	N
A5	2ko	cdc	UNKNOWN	SYBR	None	39.214	34.914	44.0435	23.3096	23.2535	0.0599151		-8.65653	0.0603513			-5.2933	TRUE	0.936013	TRUE	3	16	1	79.9144				N	N	N
A6	2ko	y45	UNKNOWN	SYBR	None	35.3529	32.1291	38.9001	20.4056	20.3984	0.0082868		-11.5116	0.0496847			-5.14375	TRUE	0.729935	TRUE	3	13	1	82.0015				N	N	N
A7	hif1	fmo2	UNKNOWN	SYBR	None				20.8052	20.7838	0.0203002							TRUE	0.362712	TRUE	3	14	1	77.8216				N	N	N
A8	hif1	cdc	UNKNOWN	SYBR	None	0.0159238	0.0154302	0.0164331	23.3792	23.3933	0.0197732		2.60944	0.0163613			5.97268	TRUE	0.936013	TRUE	3	16	1	79.6106				N	N	N
A9	hif1	y45	UNKNOWN	SYBR	None	0.014045	0.0129518	0.0152306	20.6454	20.5698	0.0700492		-0.214064	0.042107			6.15379	TRUE	0.729935	TRUE	3	13	1	81.8458				N	N	N
A10	2o4k	fmo2	UNKNOWN	SYBR	None				21.6436	21.576	0.0588328							TRUE	0.362712	TRUE	3	16	1	77.821				N	N	N
A11	2o4k	cdc	UNKNOWN	SYBR	None	0.0199246	0.0184125	0.0215609	23.7175	23.8621	0.0836065		2.28607	0.0481536			5.64931	TRUE	0.936013	TRUE	3	16	1	79.4771				N	N	N
A12	2o4k	y45	UNKNOWN	SYBR	None	0.0195458	0.0182213	0.0209667	20.8212	20.8852	0.0638377		-0.690864	0.0428133			5.67699	TRUE	0.729935	TRUE	3	13	1	81.713				N	N	N
B1	n2	fmo2	UNKNOWN	SYBR	None				26.9706	27.0023	0.138307							TRUE	0.362712	TRUE	3	21	1	77.827				N	N	N
B2	n2	cdc	UNKNOWN	SYBR	None	1	0.838206	1.19302	23.5624	23.6391	0.176954		-3.36324	0.10768			0	TRUE	0.936013	TRUE	3	16	1	79.6162				N	N	N
B3	n2	y45	UNKNOWN	SYBR	None	1	0.868727	1.15111	20.6616	20.6345	0.0772889		-6.36786	0.0858596			0	TRUE	0.729935	TRUE	3	13	1	81.5669				N	N	N
B4	2ko	fmo2	UNKNOWN	SYBR	None				31.9853	31.91	0.0856565							TRUE	0.362712	TRUE	3	26	1	77.3927				N	N	N
B5	2ko	cdc	UNKNOWN	SYBR	None	39.214	34.914	44.0435	23.2604	23.2535	0.0599151		-8.65653	0.0603513			-5.2933	TRUE	0.936013	TRUE	3	16	1	79.7653				N	N	N
B6	2ko	y45	UNKNOWN	SYBR	None	35.3529	32.1291	38.9001	20.3893	20.3984	0.0082868		-11.5116	0.0496847			-5.14375	TRUE	0.729935	TRUE	3	13	1	82.0015				N	N	N
B7	hif1	fmo2	UNKNOWN	SYBR	None				20.7648	20.7838	0.0203002							TRUE	0.362712	TRUE	3	14	1	77.6725				N	N	N
B8	hif1	cdc	UNKNOWN	SYBR	None	0.0159238	0.0154302	0.0164331	23.3847	23.3933	0.0197732		2.60944	0.0163613			5.97268	TRUE	0.936013	TRUE	3	16	1	79.6106				N	N	N
B9	hif1	y45	UNKNOWN	SYBR	None	0.014045	0.0129518	0.0152306	20.5568	20.5698	0.0700492		-0.214064	0.042107			6.15379	TRUE	0.729935	TRUE	3	13	1	81.8458				N	N	N
B10	2o4k	fmo2	UNKNOWN	SYBR	None				21.5488	21.576	0.0588328							TRUE	0.362712	TRUE	3	16	1	77.821				N	N	N
B11	2o4k	cdc	UNKNOWN	SYBR	None	0.0199246	0.0184125	0.0215609	23.8632	23.8621	0.0836065		2.28607	0.0481536			5.64931	TRUE	0.936013	TRUE	3	17	1	79.4771				N	N	N
B12	2o4k	y45	UNKNOWN	SYBR	None	0.0195458	0.0182213	0.0209667	20.9138	20.8852	0.0638377		-0.690864	0.0428133			5.67699	TRUE	0.729935	TRUE	3	13	1	81.5639				N	N	N
C1	n2	fmo2	UNKNOWN	SYBR	None				26.8827	27.0023	0.138307							TRUE	0.362712	TRUE	3	21	1	77.827				N	N	N
C2	n2	cdc	UNKNOWN	SYBR	None	1	0.838206	1.19302	23.7253	23.6391	0.176954		-3.36324	0.10768			0	TRUE	0.936013	TRUE	3	16	1	79.6162				N	N	N
C3	n2	y45	UNKNOWN	SYBR	None	1	0.868727	1.15111	20.5746	20.6345	0.0772889		-6.36786	0.0858596			0	TRUE	0.729935	TRUE	3	13	1	81.5669				N	N	N
C4	2ko	fmo2	UNKNOWN	SYBR	None				31.8168	31.91	0.0856565							TRUE	0.362712	TRUE	3	26	1	77.3927				N	N	N
C5	2ko	cdc	UNKNOWN	SYBR	None	39.214	34.914	44.0435	23.1904	23.2535	0.0599151		-8.65653	0.0603513			-5.2933	TRUE	0.936013	TRUE	3	16	1	79.7653				N	N	N
C6	2ko	y45	UNKNOWN	SYBR	None	35.3529	32.1291	38.9001	20.4003	20.3984	0.0082868		-11.5116	0.0496847			-5.14375	TRUE	0.729935	TRUE	3	13	1	81.8524				N	N	N
C7	hif1	fmo2	UNKNOWN	SYBR	None				20.7814	20.7838	0.0203002							TRUE	0.362712	TRUE	3	14	1	77.6725				N	N	N
C8	hif1	cdc	UNKNOWN	SYBR	None	0.0159238	0.0154302	0.0164331	23.4159	23.3933	0.0197732		2.60944	0.0163613			5.97268	TRUE	0.936013	TRUE	3	16	1	79.6106				N	N	N
C9	hif1	y45	UNKNOWN	SYBR	None	0.014045	0.0129518	0.0152306	20.5071	20.5698	0.0700492		-0.214064	0.042107			6.15379	TRUE	0.729935	TRUE	3	13	1	81.8458				N	N	N
C10	2o4k	fmo2	UNKNOWN	SYBR	None				21.5358	21.576	0.0588328							TRUE	0.362712	TRUE	3	16	1	77.821				N	N	N
C11	2o4k	cdc	UNKNOWN	SYBR	None	0.0199246	0.0184125	0.0215609	23.8339	23.8621	0.0836065		2.28607	0.0481536			5.64931	TRUE	0.936013	TRUE	3	16	1	79.4771				N	N	N
C12	2o4k	y45	UNKNOWN	SYBR	None	0.0195458	0.0182213	0.0209667	20.7918	20.8852	0.0638377		-0.690864	0.0428133			5.67699	TRUE	0.729935	TRUE	3	13	1	81.5639				N	N	N
D1	n2	fmo4	UNKNOWN	SYBR	None	1	0.659633	1.51599	23.2255	23.4491	0.34799		-3.55323	0.216199			0	TRUE	0.564213	TRUE	3	16	1	77.3798				N	N	N
D2	n2	cdc	UNKNOWN	SYBR	None	1	0.838206	1.19302	23.618	23.6391	0.176954		-3.36324	0.10768			0	TRUE	0.936013	TRUE	3	16	1	79.6162				N	N	N
D3	n2	y45	UNKNOWN	SYBR	None	1	0.868727	1.15111	20.6653	20.6345	0.0772889		-6.36786	0.0858596			0	TRUE	0.729935	TRUE	3	13	1	81.5669				N	N	N
D4	2ko crisp	fmo2	UNKNOWN	SYBR	None				31.5843	32.0299	0.775978							TRUE	0.362712	TRUE	3	26	1	77.6908				Y	N	N
D5	2ko crisp	cdc	UNKNOWN	SYBR	None	54.2208	22.8746	128.522	22.9454	22.9059	0.0343631		-9.12401	0.44845			-5.76077	TRUE	0.936013	TRUE	3	16	1	79.6163				N	N	N
D6	2ko crisp	y45	UNKNOWN	SYBR	None	55.2056	23.2717	130.96	19.8321	19.8753	0.0478046		-12.1546	0.44886			-5.78674	TRUE	0.729935	TRUE	3	12	1	81.8524				N	N	N
D7	scl	fmo2	UNKNOWN	SYBR	None				25.145	25.2209	0.0683592							TRUE	0.362712	TRUE	3	19	1	77.6725				N	N	N
D8	scl	cdc	UNKNOWN	SYBR	None	0.298763	0.270572	0.329891	23.6256	23.6006	0.0573057		-1.62031	0.0515006			1.74293	TRUE	0.936013	TRUE	3	16	1	79.4615				N	N	N
D9	scl	y45	UNKNOWN	SYBR	None	0.282878	0.262112	0.305289	20.6694	20.6748	0.00597511		-4.54611	0.0396177			1.82175	TRUE	0.729935	TRUE	3	13	1	81.8458				N	N	N
D10	2o4k	fmo4	UNKNOWN	SYBR	None	8.46052e-06	5.42199e-06	1.32019e-05	34.4659	34.8736	0.396111		13.2976	0.231203			16.8508	TRUE	0.564213	TRUE	3	28	1	77.3737	72.1563			N	N	Y
D11	2o4k	cdc	UNKNOWN	SYBR	None	0.0199246	0.0184125	0.0215609	23.9131	23.8621	0.0836065		2.28607	0.0481536			5.64931	TRUE	0.936013	TRUE	3	17	1	79.4771				N	N	N
D12	2o4k	y45	UNKNOWN	SYBR	None	0.0195458	0.0182213	0.0209667	20.9484	20.8852	0.0638377		-0.690864	0.0428133			5.67699	TRUE	0.729935	TRUE	3	14	1	81.5639				N	N	N
E1	n2	fmo4	UNKNOWN	SYBR	None	1	0.659633	1.51599	23.2718	23.4491	0.34799		-3.55323	0.216199			0	TRUE	0.564213	TRUE	3	16	1	77.3798				N	N	N
E2	n2	cdc	UNKNOWN	SYBR	None	1	0.838206	1.19302	23.9459	23.6391	0.176954		-3.36324	0.10768			0	TRUE	0.936013	TRUE	3	16	1	79.4671				N	N	N
E3	n2	y45	UNKNOWN	SYBR	None	1	0.868727	1.15111	20.7253	20.6345	0.0772889		-6.36786	0.0858596			0	TRUE	0.729935	TRUE	3	13	1	81.5669				N	N	N
E4	2ko crisp	fmo2	UNKNOWN	SYBR	None				31.5795	32.0299	0.775978							TRUE	0.362712	TRUE	3	26	1	77.5418				Y	N	N
E5	2ko crisp	cdc	UNKNOWN	SYBR	None	54.2208	22.8746	128.522	22.8825	22.9059	0.0343631		-9.12401	0.44845			-5.76077	TRUE	0.936013	TRUE	3	16	1	79.6163				N	N	N
E6	2ko crisp	y45	UNKNOWN	SYBR	None	55.2056	23.2717	130.96	19.8672	19.8753	0.0478046		-12.1546	0.44886			-5.78674	TRUE	0.729935	TRUE	3	12	1	81.8524				N	N	N
E7	scl	fmo2	UNKNOWN	SYBR	None				25.2776	25.2209	0.0683592							TRUE	0.362712	TRUE	3	19	1	77.6725				N	N	N
E8	scl	cdc	UNKNOWN	SYBR	None	0.298763	0.270572	0.329891	23.535	23.6006	0.0573057		-1.62031	0.0515006			1.74293	TRUE	0.936013	TRUE	3	16	1	79.4615				N	N	N
E9	scl	y45	UNKNOWN	SYBR	None	0.282878	0.262112	0.305289	20.6812	20.6748	0.00597511		-4.54611	0.0396177			1.82175	TRUE	0.729935	TRUE	3	13	1	81.8458				N	N	N
E10	2o4k	fmo4	UNKNOWN	SYBR	None	8.46052e-06	5.42199e-06	1.32019e-05	35.257	34.8736	0.396111		13.2976	0.231203			16.8508	TRUE	0.564213	TRUE	3	28	1	77.3737	81.9949	68.1315		N	N	Y
E11	2o4k	cdc	UNKNOWN	SYBR	None	0.0199246	0.0184125	0.0215609	23.9634	23.8621	0.0836065		2.28607	0.0481536			5.64931	TRUE	0.936013	TRUE	3	16	1	79.4771				N	N	N
E12	2o4k	y45	UNKNOWN	SYBR	None	0.0195458	0.0182213	0.0209667	20.9009	20.8852	0.0638377		-0.690864	0.0428133			5.67699	TRUE	0.729935	TRUE	3	14	1	81.5639				N	N	N
F1	n2	fmo4	UNKNOWN	SYBR	None	1	0.659633	1.51599	23.85	23.4491	0.34799		-3.55323	0.216199			0	TRUE	0.564213	TRUE	3	17	1	77.3798				N	N	N
F2	n2	cdc	UNKNOWN	SYBR	None	1	0.838206	1.19302	23.542	23.6391	0.176954		-3.36324	0.10768			0	TRUE	0.936013	TRUE	3	16	1	79.6162				N	N	N
F3	n2	y45	UNKNOWN	SYBR	None	1	0.868727	1.15111	20.6689	20.6345	0.0772889		-6.36786	0.0858596			0	TRUE	0.729935	TRUE	3	13	1	81.5669				N	N	N
F4	2ko crisp	fmo2	UNKNOWN	SYBR	None				32.9259	32.0299	0.775978							TRUE	0.362712	TRUE	3	27	1	77.6908				Y	Y	N
F5	2ko crisp	cdc	UNKNOWN	SYBR	None	54.2208	22.8746	128.522	22.8898	22.9059	0.0343631		-9.12401	0.44845			-5.76077	TRUE	0.936013	TRUE	3	16	1	79.6163				N	N	N
F6	2ko crisp	y45	UNKNOWN	SYBR	None	55.2056	23.2717	130.96	19.9266	19.8753	0.0478046		-12.1546	0.44886			-5.78674	TRUE	0.729935	TRUE	3	13	1	81.8524				N	N	N
F7	scl	fmo2	UNKNOWN	SYBR	None				25.2401	25.2209	0.0683592							TRUE	0.362712	TRUE	3	19	1	77.6725				N	N	N
F8	scl	cdc	UNKNOWN	SYBR	None	0.298763	0.270572	0.329891	23.6411	23.6006	0.0573057		-1.62031	0.0515006			1.74293	TRUE	0.936013	TRUE	3	16	1	79.4615				N	N	N
F9	scl	y45	UNKNOWN	SYBR	None	0.282878	0.262112	0.305289	20.6737	20.6748	0.00597511		-4.54611	0.0396177			1.82175	TRUE	0.729935	TRUE	3	13	1	81.8458				N	N	N
F10	2o4k	fmo4	UNKNOWN	SYBR	None	8.46052e-06	5.42199e-06	1.32019e-05	34.8979	34.8736	0.396111		13.2976	0.231203			16.8508	TRUE	0.564213	TRUE	3	28	1	76.9265	81.9949			N	N	Y
F11	2o4k	cdc	UNKNOWN	SYBR	None	0.0199246	0.0184125	0.0215609	23.8816	23.8621	0.0836065		2.28607	0.0481536			5.64931	TRUE	0.936013	TRUE	3	17	1	79.4771				N	N	N
F12	2o4k	y45	UNKNOWN	SYBR	None	0.0195458	0.0182213	0.0209667	20.9351	20.8852	0.0638377		-0.690864	0.0428133			5.67699	TRUE	0.729935	TRUE	3	14	1	81.713				N	N	N
Analysis Type	Singleplex
Endogenous Control	fmo2
RQ Min/Max Confidence Level	95.0
Reference Sample	n2

## Sheet: Sheet1
2O4K	Ct mean	Ct SD	Geo Mean
cdc-42	23.8621	0.0836065	22.3241	0.116947						Worm Strain	Primer	Fold Change
Y45F10D.4	20.8852	0.0638377								FMO-2 KO	fmo-2	0.027
fmo-2	21.576	0.0588328
										FMO-2 KO Crispr	fmo-2	0.018
										HIF-1	fmo-2	67.13
										SCL-17	fmo-2	3.45
N2
cdc-42	23.6391	0.176954	22.0858	0.123673		fmo-2
Y45F10D.4	20.6345	0.0772889
fmo-2	27.0023	0.138307					Geo Mean Fold Change
					fmo-2	-5.66462	50.7247
2O4K	Ct mean	Ct SD	Geo Mean
cdc-42	23.8621	0.0836065	22.3241	0.0730565
Y45F10D.4	20.8852	0.0638377
fmo-4	34.8736	0.396111
										Worm Strain	Primer	Fold Change
N2
cdc-42	23.6391	0.176954	22.0858	0.168209		fmo-4				FMO-2OE;4KO	fmo2	50.72
Y45F10D.4	20.6345	0.0772889									fmo4	0.00043
fmo-4	23.4491	0.34799					Geo Mean Fold Change
					fmo-4	11.1862	0.000429157
2KO	Ct mean	Ct SD	Geo Mean
cdc-42	23.2535	0.0599151	21.7792	0.0222824
Y45F10D.4	20.3984	0.0082868
fmo-2	31.91	0.0856565
N2
cdc-42	23.6391	0.176954	22.0858	0.123673		fmo-2
Y45F10D.4	20.6345	0.0772889
fmo-2	27.0023	0.138307					Geo Mean Fold Change
					fmo-2	5.21422	0.0269378
2KO Crispr	Ct mean	Ct SD	Geo Mean
cdc-42	22.9059	0.0343631	21.3369	0.108427
Y45F10D.4	19.8753	0.0478046
fmo-2	32.0299	0.775978
N2
cdc-42	23.6391	0.176954	22.0858	0.123673		fmo-2
Y45F10D.4	20.6345	0.0772889
fmo-2	27.0023	0.138307					Geo Mean Fold Change
					fmo-2	5.77646	0.0182437
hif1	Ct mean	Ct SD	Geo Mean
cdc-42	23.3933	0.0197732	21.9361	0.0372169
Y45F10D.4	20.5698	0.0700492
fmo-2	20.7838	0.0203002
N2
cdc-42	23.6391	0.176954	22.0858	0.123673		fmo-2
Y45F10D.4	20.6345	0.0772889
fmo-2	27.0023	0.138307					Geo Mean Fold Change
					fmo-2	-6.06889	67.1301
scl	Ct mean	Ct SD	Geo Mean
cdc-42	23.6006	0.0573057	22.0893	0.0286053
Y45F10D.4	20.6748	0.00597511
fmo-2	25.2209	0.0683592
N2
cdc-42	23.6391	0.176954	22.0858	0.123673		fmo-2
Y45F10D.4	20.6345	0.0772889
fmo-2	27.0023	0.138307					Geo Mean Fold Change
					fmo-2	-1.78498	3.44615
