# Supplementary material for: fmo-4 promotes longevity and stress resistance via ER to mitochondria calcium regulation in C. elegans
Source: eLife journal article supplement (doi:10.7554/elife.99971), 2024-08-27
Supplement: supp7 [file 21mar2024 fmo2 levels 2ko 2ko crispr hif1 scl17 fmo4 in 2o4k_data.xls]

## Sheet: Results
Block Type	96well
Chemistry	SYBR_GREEN
Experiment File Name	C:\Applied Biosystems\StepOne Software v2.3\experiments\Tuckowski\21mar2024 fmo2 levels 2ko 2ko crispr hif1 scl17 fmo4 in 2o4k.eds
Experiment Run End Time	2024-03-21 12:16:47 PM EDT
Instrument Type	steponeplus
Passive Reference	ROX
Well	Sample Name	Target Name	Task	Reporter	Quencher	RQ	RQ Min	RQ Max	Cт	Cт Mean	Cт SD	ΔCт	ΔCт Mean	ΔCт SE	HK Control ΔCт Mean	HK Control ΔCт SE	ΔΔCт	Automatic Ct Threshold	Ct Threshold	Automatic Baseline	Baseline Start	Baseline End	Efficiency	Tm1	Tm2	Tm3	Comments	HIGHSD	MTP
A1	n2	fmo2	UNKNOWN	SYBR	None				27.1501	27.0107	0.135436							TRUE	0.406036	TRUE	3	21	1	77.8024				N	N
A2	n2	cdc	UNKNOWN	SYBR	None	1	0.830815	1.20364	23.3687	23.5983	0.200104		-3.41246	0.113084			0	TRUE	0.863918	TRUE	3	16	1	79.7437				N	N
A3	n2	y45	UNKNOWN	SYBR	None	1	0.870219	1.14914	20.7183	20.8561	0.0804562		-6.15465	0.0848124			0	TRUE	0.766591	TRUE	3	13	1	81.54				N	N
A4	2ko	fmo2	UNKNOWN	SYBR	None				32.942	32.2076	0.649134							TRUE	0.406036	TRUE	3	27	1	77.5059				Y	N
A5	2ko	cdc	UNKNOWN	SYBR	None	49.4197	24.0185	101.684	23.1607	23.1681	0.0177187		-9.03947	0.374917			-5.62701	TRUE	0.863918	TRUE	3	16	1	79.8962				N	N
A6	2ko	y45	UNKNOWN	SYBR	None	47.0175	22.853	96.7332	20.4811	20.4978	0.0145994		-11.7098	0.374872			-5.55513	TRUE	0.766591	TRUE	3	13	1	81.986				N	N
A7	hif1	fmo2	UNKNOWN	SYBR	None				20.9838	20.9808	0.0290157							TRUE	0.406036	TRUE	3	15	1	77.7972				N	N
A8	hif1	cdc	UNKNOWN	SYBR	None	0.0170965	0.0154419	0.0189285	23.5234	23.4385	0.0868971		2.4577	0.052893			5.87015	TRUE	0.863918	TRUE	3	16	1	79.5888				N	N
A9	hif1	y45	UNKNOWN	SYBR	None	0.0155642	0.0148596	0.0163023	20.8578	20.8318	0.029945		-0.149029	0.0240736			6.00562	TRUE	0.766591	TRUE	3	13	1	81.8304				N	N
A10	2o4k	fmo2	UNKNOWN	SYBR	None				21.6662	21.6679	0.00484502							TRUE	0.406036	TRUE	3	15	1	77.7998				N	N
A11	2o4k	cdc	UNKNOWN	SYBR	None	0.0218772	0.0206813	0.0231422	23.6914	23.7698	0.0837317		2.10197	0.0342976			5.51443	TRUE	0.863918	TRUE	3	16	1	79.4539				N	N
A12	2o4k	y45	UNKNOWN	SYBR	None	0.0218775	0.0209734	0.0228206	20.9986	21.0276	0.0627015		-0.640244	0.0257502			5.51441	TRUE	0.766591	TRUE	3	13	1	81.694				N	N
B1	n2	fmo2	UNKNOWN	SYBR	None				27.0026	27.0107	0.135436							TRUE	0.406036	TRUE	3	21	1	77.8024				N	N
B2	n2	cdc	UNKNOWN	SYBR	None	1	0.830815	1.20364	23.4397	23.5983	0.200104		-3.41246	0.113084			0	TRUE	0.863918	TRUE	3	16	1	79.5943				N	N
B3	n2	y45	UNKNOWN	SYBR	None	1	0.870219	1.14914	20.9394	20.8561	0.0804562		-6.15465	0.0848124			0	TRUE	0.766591	TRUE	3	13	1	81.54				N	N
B4	2ko	fmo2	UNKNOWN	SYBR	None				31.9702	32.2076	0.649134							TRUE	0.406036	TRUE	3	26	1	77.5059				Y	N
B5	2ko	cdc	UNKNOWN	SYBR	None	49.4197	24.0185	101.684	23.1553	23.1681	0.0177187		-9.03947	0.374917			-5.62701	TRUE	0.863918	TRUE	3	16	1	79.7469				N	N
B6	2ko	y45	UNKNOWN	SYBR	None	47.0175	22.853	96.7332	20.508	20.4978	0.0145994		-11.7098	0.374872			-5.55513	TRUE	0.766591	TRUE	3	13	1	81.8368				N	N
B7	hif1	fmo2	UNKNOWN	SYBR	None				20.9504	20.9808	0.0290157							TRUE	0.406036	TRUE	3	15	1	77.7972				N	N
B8	hif1	cdc	UNKNOWN	SYBR	None	0.0170965	0.0154419	0.0189285	23.4424	23.4385	0.0868971		2.4577	0.052893			5.87015	TRUE	0.863918	TRUE	3	16	1	79.5888				N	N
B9	hif1	y45	UNKNOWN	SYBR	None	0.0155642	0.0148596	0.0163023	20.7991	20.8318	0.029945		-0.149029	0.0240736			6.00562	TRUE	0.766591	TRUE	3	13	1	81.8304				N	N
B10	2o4k	fmo2	UNKNOWN	SYBR	None				21.6733	21.6679	0.00484502							TRUE	0.406036	TRUE	3	16	1	77.7998				N	N
B11	2o4k	cdc	UNKNOWN	SYBR	None	0.0218772	0.0206813	0.0231422	23.7266	23.7698	0.0837317		2.10197	0.0342976			5.51443	TRUE	0.863918	TRUE	3	16	1	79.4539				N	N
B12	2o4k	y45	UNKNOWN	SYBR	None	0.0218775	0.0209734	0.0228206	21.0395	21.0276	0.0627015		-0.640244	0.0257502			5.51441	TRUE	0.766591	TRUE	3	13	1	81.5447				N	N
C1	n2	fmo2	UNKNOWN	SYBR	None				26.8796	27.0107	0.135436							TRUE	0.406036	TRUE	3	20	1	77.8024				N	N
C2	n2	cdc	UNKNOWN	SYBR	None	1	0.830815	1.20364	23.5311	23.5983	0.200104		-3.41246	0.113084			0	TRUE	0.863918	TRUE	3	16	1	79.5943				N	N
C3	n2	y45	UNKNOWN	SYBR	None	1	0.870219	1.14914	20.8098	20.8561	0.0804562		-6.15465	0.0848124			0	TRUE	0.766591	TRUE	3	13	1	81.54				N	N
C4	2ko	fmo2	UNKNOWN	SYBR	None				31.7105	32.2076	0.649134							TRUE	0.406036	TRUE	3	25	1	77.5059				Y	N
C5	2ko	cdc	UNKNOWN	SYBR	None	49.4197	24.0185	101.684	23.1883	23.1681	0.0177187		-9.03947	0.374917			-5.62701	TRUE	0.863918	TRUE	3	16	1	79.7469				N	N
C6	2ko	y45	UNKNOWN	SYBR	None	47.0175	22.853	96.7332	20.5043	20.4978	0.0145994		-11.7098	0.374872			-5.55513	TRUE	0.766591	TRUE	3	13	1	81.8368				N	N
C7	hif1	fmo2	UNKNOWN	SYBR	None				21.0082	20.9808	0.0290157							TRUE	0.406036	TRUE	3	15	1	77.6479				N	N
C8	hif1	cdc	UNKNOWN	SYBR	None	0.0170965	0.0154419	0.0189285	23.3497	23.4385	0.0868971		2.4577	0.052893			5.87015	TRUE	0.863918	TRUE	3	16	1	79.5888				N	N
C9	hif1	y45	UNKNOWN	SYBR	None	0.0155642	0.0148596	0.0163023	20.8385	20.8318	0.029945		-0.149029	0.0240736			6.00562	TRUE	0.766591	TRUE	3	13	1	81.8304				N	N
C10	2o4k	fmo2	UNKNOWN	SYBR	None				21.6641	21.6679	0.00484502							TRUE	0.406036	TRUE	3	15	1	77.7998				N	N
C11	2o4k	cdc	UNKNOWN	SYBR	None	0.0218772	0.0206813	0.0231422	23.7699	23.7698	0.0837317		2.10197	0.0342976			5.51443	TRUE	0.863918	TRUE	3	16	1	79.4539				N	N
C12	2o4k	y45	UNKNOWN	SYBR	None	0.0218775	0.0209734	0.0228206	20.9141	21.0276	0.0627015		-0.640244	0.0257502			5.51441	TRUE	0.766591	TRUE	3	14	1	81.5447				N	N
D1	n2	fmo4	UNKNOWN	SYBR	None	1	0.825758	1.21101	22.4975	22.5274	0.106526		-4.48335	0.099483			0	TRUE	0.329108	TRUE	3	17	1	77.3544				N	N
D2	n2	cdc	UNKNOWN	SYBR	None	1	0.830815	1.20364	23.6103	23.5983	0.200104		-3.41246	0.113084			0	TRUE	0.863918	TRUE	3	16	1	79.5943				N	N
D3	n2	y45	UNKNOWN	SYBR	None	1	0.870219	1.14914	20.867	20.8561	0.0804562		-6.15465	0.0848124			0	TRUE	0.766591	TRUE	3	13	1	81.54				N	N
D4	2ko crispr	fmo2	UNKNOWN	SYBR	None				32.0799	32.7118	0.90139							TRUE	0.406036	TRUE	3	26	1	77.5059				Y	N
D5	2ko crispr	cdc	UNKNOWN	SYBR	None	62.8232	23.0269	171.398	23.3939	23.3261	0.058779		-9.38568	0.521523			-5.97323	TRUE	0.863918	TRUE	3	16	1	79.5976				N	N
D6	2ko crispr	y45	UNKNOWN	SYBR	None	51.0502	18.7192	139.221	20.8412	20.8833	0.0528635		-11.8285	0.521312			-5.67384	TRUE	0.766591	TRUE	3	13	1	81.6875				N	N
D7	scl17	fmo2	UNKNOWN	SYBR	None				25.2889	25.2974	0.0274656							TRUE	0.406036	TRUE	3	19	1	77.6479				N	N
D8	scl17	cdc	UNKNOWN	SYBR	None	0.335452	0.318896	0.352867	23.478	23.4607	0.0363397		-1.83664	0.0262991			1.57582	TRUE	0.863918	TRUE	3	16	1	79.4395				N	N
D9	scl17	y45	UNKNOWN	SYBR	None	0.300969	0.286042	0.316675	20.8548	20.875	0.0366286		-4.42234	0.0264324			1.73231	TRUE	0.766591	TRUE	3	14	1	81.8304				N	N
D10	2o4k	fmo4	UNKNOWN	SYBR	None	1.17358e-06	1.0769e-06	1.27893e-06	36.9145	36.8852	0.0772211		15.2173	0.0446713			19.7007	TRUE	0.329108	TRUE	3	31	1	82.7261				N	N
D11	2o4k	cdc	UNKNOWN	SYBR	None	0.0218772	0.0206813	0.0231422	23.7128	23.7698	0.0837317		2.10197	0.0342976			5.51443	TRUE	0.863918	TRUE	3	16	1	79.4539				N	N
D12	2o4k	y45	UNKNOWN	SYBR	None	0.0218775	0.0209734	0.0228206	21.0731	21.0276	0.0627015		-0.640244	0.0257502			5.51441	TRUE	0.766591	TRUE	3	14	1	81.5447				N	N
E1	n2	fmo4	UNKNOWN	SYBR	None	1	0.825758	1.21101	22.4389	22.5274	0.106526		-4.48335	0.099483			0	TRUE	0.329108	TRUE	3	17	1	77.3544				N	N
E2	n2	cdc	UNKNOWN	SYBR	None	1	0.830815	1.20364	23.9186	23.5983	0.200104		-3.41246	0.113084			0	TRUE	0.863918	TRUE	3	17	1	79.445				N	N
E3	n2	y45	UNKNOWN	SYBR	None	1	0.870219	1.14914	20.9099	20.8561	0.0804562		-6.15465	0.0848124			0	TRUE	0.766591	TRUE	3	14	1	81.54				N	N
E4	2ko crispr	fmo2	UNKNOWN	SYBR	None				32.3114	32.7118	0.90139							TRUE	0.406036	TRUE	3	26	1	77.5059				Y	N
E5	2ko crispr	cdc	UNKNOWN	SYBR	None	62.8232	23.0269	171.398	23.2891	23.3261	0.058779		-9.38568	0.521523			-5.97323	TRUE	0.863918	TRUE	3	16	1	79.5976				N	N
E6	2ko crispr	y45	UNKNOWN	SYBR	None	51.0502	18.7192	139.221	20.866	20.8833	0.0528635		-11.8285	0.521312			-5.67384	TRUE	0.766591	TRUE	3	13	1	81.6875				N	N
E7	scl17	fmo2	UNKNOWN	SYBR	None				25.3281	25.2974	0.0274656							TRUE	0.406036	TRUE	3	19	1	77.6479				N	N
E8	scl17	cdc	UNKNOWN	SYBR	None	0.335452	0.318896	0.352867	23.419	23.4607	0.0363397		-1.83664	0.0262991			1.57582	TRUE	0.863918	TRUE	3	16	1	79.5888				N	N
E9	scl17	y45	UNKNOWN	SYBR	None	0.300969	0.286042	0.316675	20.853	20.875	0.0366286		-4.42234	0.0264324			1.73231	TRUE	0.766591	TRUE	3	13	1	81.8304				N	N
E10	2o4k	fmo4	UNKNOWN	SYBR	None	1.17358e-06	1.0769e-06	1.27893e-06	36.7976	36.8852	0.0772211		15.2173	0.0446713			19.7007	TRUE	0.329108	TRUE	3	31	1	68.3952	79.7405			N	Y
E11	2o4k	cdc	UNKNOWN	SYBR	None	0.0218772	0.0206813	0.0231422	23.9217	23.7698	0.0837317		2.10197	0.0342976			5.51443	TRUE	0.863918	TRUE	3	17	1	79.4539				N	N
E12	2o4k	y45	UNKNOWN	SYBR	None	0.0218775	0.0209734	0.0228206	21.0637	21.0276	0.0627015		-0.640244	0.0257502			5.51441	TRUE	0.766591	TRUE	3	14	1	81.5447				N	N
F1	n2	fmo4	UNKNOWN	SYBR	None	1	0.825758	1.21101	22.6456	22.5274	0.106526		-4.48335	0.099483			0	TRUE	0.329108	TRUE	3	17	1	77.3544				N	N
F2	n2	cdc	UNKNOWN	SYBR	None	1	0.830815	1.20364	23.7211	23.5983	0.200104		-3.41246	0.113084			0	TRUE	0.863918	TRUE	3	17	1	79.445				N	N
F3	n2	y45	UNKNOWN	SYBR	None	1	0.870219	1.14914	20.892	20.8561	0.0804562		-6.15465	0.0848124			0	TRUE	0.766591	TRUE	3	13	1	81.54				N	N
F4	2ko crispr	fmo2	UNKNOWN	SYBR	None				33.744	32.7118	0.90139							TRUE	0.406036	TRUE	3	27	1	77.6554				Y	N
F5	2ko crispr	cdc	UNKNOWN	SYBR	None	62.8232	23.0269	171.398	23.2953	23.3261	0.058779		-9.38568	0.521523			-5.97323	TRUE	0.863918	TRUE	3	16	1	79.5976				N	N
F6	2ko crispr	y45	UNKNOWN	SYBR	None	51.0502	18.7192	139.221	20.9426	20.8833	0.0528635		-11.8285	0.521312			-5.67384	TRUE	0.766591	TRUE	3	13	1	81.6875				N	N
F7	scl17	fmo2	UNKNOWN	SYBR	None				25.2752	25.2974	0.0274656							TRUE	0.406036	TRUE	3	19	1	77.6479				N	N
F8	scl17	cdc	UNKNOWN	SYBR	None	0.335452	0.318896	0.352867	23.4853	23.4607	0.0363397		-1.83664	0.0262991			1.57582	TRUE	0.863918	TRUE	3	16	1	79.5888				N	N
F9	scl17	y45	UNKNOWN	SYBR	None	0.300969	0.286042	0.316675	20.9173	20.875	0.0366286		-4.42234	0.0264324			1.73231	TRUE	0.766591	TRUE	3	14	1	81.8304				N	N
F10	2o4k	fmo4	UNKNOWN	SYBR	None	1.17358e-06	1.0769e-06	1.27893e-06	36.9435	36.8852	0.0772211		15.2173	0.0446713			19.7007	TRUE	0.329108	TRUE	3	31	1	72.1272	82.1289			N	Y
F11	2o4k	cdc	UNKNOWN	SYBR	None	0.0218772	0.0206813	0.0231422	23.7966	23.7698	0.0837317		2.10197	0.0342976			5.51443	TRUE	0.863918	TRUE	3	16	1	79.4539				N	N
F12	2o4k	y45	UNKNOWN	SYBR	None	0.0218775	0.0209734	0.0228206	21.0767	21.0276	0.0627015		-0.640244	0.0257502			5.51441	TRUE	0.766591	TRUE	3	13	1	81.5447				N	N
Analysis Type	Singleplex
Endogenous Control	fmo2
RQ Min/Max Confidence Level	95.0
Reference Sample	n2

## Sheet: Sheet1
2O4K	Ct mean	Ct SD	Geo Mean
cdc-42	23.7698	0.0837317	22.3567	0.126884						Worm Strain	Primer	Fold Change
Y45F10D.4	21.0276	0.0627015								FMO-2 KO	fmo-2	0.021
fmo-2	21.6679	0.00484502
										FMO-2 KO Crispr	fmo-2	0.0178
										HIF-1	fmo-2	61.47
										SCL-17	fmo-2	3.16
N2
cdc-42	23.5983	0.200104	22.1848	0.129673		fmo-2
Y45F10D.4	20.8561	0.0804562
fmo-2	27.0107	0.135436					Geo Mean Fold Change
					fmo-2	-5.51474	45.7197
2O4K	Ct mean	Ct SD	Geo Mean
cdc-42	23.7698	0.0837317	22.3567	0.0724576
Y45F10D.4	21.0276	0.0627015
fmo-4	36.8852	0.0772211
										Worm Strain	Primer	Fold Change
N2
cdc-42	23.5983	0.200104	22.1848	0.119699		fmo-4				FMO-2OE;4KO	fmo2	45.7
Y45F10D.4	20.8561	0.0804562									fmo4	5.36554e-05
fmo-4	22.5274	0.106526					Geo Mean Fold Change
					fmo-4	14.1859	5.36554e-05
2KO	Ct mean	Ct SD	Geo Mean
cdc-42	23.1681	0.0177187	21.7921	0.0160836
Y45F10D.4	20.4978	0.0145994
fmo-2	32.2076	0.649134
N2
cdc-42	23.5983	0.200104	22.1848	0.129673		fmo-2
Y45F10D.4	20.8561	0.0804562
fmo-2	27.0107	0.135436					Geo Mean Fold Change
					fmo-2	5.58961	0.0207664
2KO Crispr	Ct mean	Ct SD	Geo Mean
cdc-42	23.3261	0.058779	22.0709	0.14096
Y45F10D.4	20.8833	0.0528635
fmo-2	32.7118	0.90139
N2
cdc-42	23.5983	0.200104	22.1848	0.129673		fmo-2
Y45F10D.4	20.8561	0.0804562
fmo-2	27.0107	0.135436					Geo Mean Fold Change
					fmo-2	5.81498	0.017763
hif1	Ct mean	Ct SD	Geo Mean
cdc-42	23.4385	0.0868971	22.0967	0.0510111
Y45F10D.4	20.8318	0.029945
fmo-2	20.9808	0.0290157
N2
cdc-42	23.5983	0.200104	22.1848	0.129673		fmo-2
Y45F10D.4	20.8561	0.0804562
fmo-2	27.0107	0.135436					Geo Mean Fold Change
					fmo-2	-5.94181	61.47
scl	Ct mean	Ct SD	Geo Mean
cdc-42	23.4607	0.0363397	22.1302	0.0331892
Y45F10D.4	20.875	0.0366286
fmo-2	25.2974	0.0274656
N2
cdc-42	23.5983	0.200104	22.1848	0.129673		fmo-2
Y45F10D.4	20.8561	0.0804562
fmo-2	27.0107	0.135436					Geo Mean Fold Change
					fmo-2	-1.65866	3.15724
