# Supplementary material for: fmo-4 promotes longevity and stress resistance via ER to mitochondria calcium regulation in C. elegans
Source: eLife journal article supplement (doi:10.7554/elife.99971), 2024-08-27
Supplement: supp7 [file 22mar2024 fmo2 levels 2ko 2ko crispr hif scl fmo4 levels 2o4k rep 3_data.xls]

## Sheet: Results
Block Type	96well
Chemistry	SYBR_GREEN
Experiment File Name	C:\Applied Biosystems\StepOne Software v2.3\experiments\Tuckowski\22mar2024 fmo2 levels 2ko 2ko crispr hif scl fmo4 levels 2o4k rep 3.eds
Experiment Run End Time	2024-03-22 10:13:02 AM EDT
Instrument Type	steponeplus
Passive Reference	ROX
Well	Sample Name	Target Name	Task	Reporter	Quencher	RQ	RQ Min	RQ Max	Cт	Cт Mean	Cт SD	ΔCт	ΔCт Mean	ΔCт SE	HK Control ΔCт Mean	HK Control ΔCт SE	ΔΔCт	Automatic Ct Threshold	Ct Threshold	Automatic Baseline	Baseline Start	Baseline End	Efficiency	Tm1	Tm2	Tm3	Comments	HIGHSD	OUTLIERRG	MTP
A1	n2	fmo2	UNKNOWN	SYBR	None				27.6286	27.381	0.222279							TRUE	0.51344	TRUE	3	21	1	77.8365				N	N	N
A2	n2	cdc	UNKNOWN	SYBR	None	1	0.803782	1.24412	22.9726	23.1116	0.0879895		-4.26935	0.133266			0	TRUE	0.831377	TRUE	3	16	1	79.774				N	N	N
A3	n2	y45	UNKNOWN	SYBR	None	1	0.78687	1.27086	20.4224	20.6003	0.171757		-6.78068	0.14624			0	TRUE	0.693109	TRUE	3	13	1	81.5741				N	N	N
A4	2ko	fmo2	UNKNOWN	SYBR	None				33.0402	32.4236	0.541533							TRUE	0.51344	TRUE	3	27	1	77.4004				Y	N	N
A5	2ko	cdc	UNKNOWN	SYBR	None	29.4557	12.1891	71.1813	22.9073	23.2737	0.580829		-9.14983	0.458483			-4.88047	TRUE	0.831377	TRUE	3	15	1	79.7702				Y	N	N
A6	2ko	y45	UNKNOWN	SYBR	None	38.1932	20.8956	69.8101	20.4283	20.3876	0.0372483		-12.0359	0.313393			-5.25525	TRUE	0.693109	TRUE	3	13	1	82.0062				N	N	N
A7	hif1	fmo2	UNKNOWN	SYBR	None				21.2772	21.3602	0.0829935							TRUE	0.51344	TRUE	3	15	1	77.6778				N	N	N
A8	hif1	cdc	UNKNOWN	SYBR	None	0.0146793	0.0131552	0.0163799	23.1496	23.1809	0.053344		1.82072	0.0569605			6.09008	TRUE	0.831377	TRUE	3	16	1	79.6155				N	N	N
A9	hif1	y45	UNKNOWN	SYBR	None	0.0164515	0.0145024	0.0186626	20.5905	20.5052	0.0774124		-0.85505	0.065525			5.92563	TRUE	0.693109	TRUE	3	13	1	81.8499				N	N	N
A10	2o4k	fmo2	UNKNOWN	SYBR	None				21.9611	22.0041	0.0925962							TRUE	0.51344	TRUE	3	15	1	77.8255				N	N	N
A11	2o4k	cdc	UNKNOWN	SYBR	None	0.0178045	0.0160843	0.0197087	23.4149	23.5463	0.0768764		1.54226	0.0619921			5.81161	TRUE	0.831377	TRUE	3	16	1	79.485				N	N	N
A12	2o4k	y45	UNKNOWN	SYBR	None	0.0213388	0.0193396	0.0235447	20.7566	20.7738	0.0668258		-1.23031	0.0600192			5.55038	TRUE	0.693109	TRUE	3	14	1	81.7211				N	N	N
B1	n2	fmo2	UNKNOWN	SYBR	None				27.3158	27.381	0.222279							TRUE	0.51344	TRUE	3	21	1	77.8365				N	N	N
B2	n2	cdc	UNKNOWN	SYBR	None	1	0.803782	1.24412	23.0453	23.1116	0.0879895		-4.26935	0.133266			0	TRUE	0.831377	TRUE	3	16	1	79.6249				N	N	N
B3	n2	y45	UNKNOWN	SYBR	None	1	0.78687	1.27086	20.5508	20.6003	0.171757		-6.78068	0.14624			0	TRUE	0.693109	TRUE	3	13	1	81.5741				N	N	N
B4	2ko	fmo2	UNKNOWN	SYBR	None				32.2054	32.4236	0.541533							TRUE	0.51344	TRUE	3	26	1	77.5495				Y	N	N
B5	2ko	cdc	UNKNOWN	SYBR	None	29.4557	12.1891	71.1813	23.9434	23.2737	0.580829		-9.14983	0.458483			-4.88047	TRUE	0.831377	TRUE	3	16	1	79.6211				Y	N	N
B6	2ko	y45	UNKNOWN	SYBR	None	38.1932	20.8956	69.8101	20.3794	20.3876	0.0372483		-12.0359	0.313393			-5.25525	TRUE	0.693109	TRUE	3	13	1	81.8571				N	N	N
B7	hif1	fmo2	UNKNOWN	SYBR	None				21.4432	21.3602	0.0829935							TRUE	0.51344	TRUE	3	15	1	77.6778				N	N	N
B8	hif1	cdc	UNKNOWN	SYBR	None	0.0146793	0.0131552	0.0163799	23.1507	23.1809	0.053344		1.82072	0.0569605			6.09008	TRUE	0.831377	TRUE	3	16	1	79.4664				N	N	N
B9	hif1	y45	UNKNOWN	SYBR	None	0.0164515	0.0145024	0.0186626	20.4856	20.5052	0.0774124		-0.85505	0.065525			5.92563	TRUE	0.693109	TRUE	3	13	1	81.8499				N	N	N
B10	2o4k	fmo2	UNKNOWN	SYBR	None				21.9408	22.0041	0.0925962							TRUE	0.51344	TRUE	3	15	1	77.8255				N	N	N
B11	2o4k	cdc	UNKNOWN	SYBR	None	0.0178045	0.0160843	0.0197087	23.5543	23.5463	0.0768764		1.54226	0.0619921			5.81161	TRUE	0.831377	TRUE	3	16	1	79.485				N	N	N
B12	2o4k	y45	UNKNOWN	SYBR	None	0.0213388	0.0193396	0.0235447	20.7487	20.7738	0.0668258		-1.23031	0.0600192			5.55038	TRUE	0.693109	TRUE	3	13	1	81.572				N	N	N
C1	n2	fmo2	UNKNOWN	SYBR	None				27.1986	27.381	0.222279							TRUE	0.51344	TRUE	3	20	1	77.8365				N	N	N
C2	n2	cdc	UNKNOWN	SYBR	None	1	0.803782	1.24412	23.1302	23.1116	0.0879895		-4.26935	0.133266			0	TRUE	0.831377	TRUE	3	16	1	79.6249				N	N	N
C3	n2	y45	UNKNOWN	SYBR	None	1	0.78687	1.27086	20.5424	20.6003	0.171757		-6.78068	0.14624			0	TRUE	0.693109	TRUE	3	13	1	81.5741				N	N	N
C4	2ko	fmo2	UNKNOWN	SYBR	None				32.0251	32.4236	0.541533							TRUE	0.51344	TRUE	3	25	1	77.4004				Y	N	N
C5	2ko	cdc	UNKNOWN	SYBR	None	29.4557	12.1891	71.1813	22.9705	23.2737	0.580829		-9.14983	0.458483			-4.88047	TRUE	0.831377	TRUE	3	15	1	79.7702				Y	N	N
C6	2ko	y45	UNKNOWN	SYBR	None	38.1932	20.8956	69.8101	20.3552	20.3876	0.0372483		-12.0359	0.313393			-5.25525	TRUE	0.693109	TRUE	3	13	1	81.8571				N	N	N
C7	hif1	fmo2	UNKNOWN	SYBR	None				21.3602	21.3602	0.0829935							TRUE	0.51344	TRUE	3	15	1	77.6778				N	N	N
C8	hif1	cdc	UNKNOWN	SYBR	None	0.0146793	0.0131552	0.0163799	23.2425	23.1809	0.053344		1.82072	0.0569605			6.09008	TRUE	0.831377	TRUE	3	16	1	79.4664				N	N	N
C9	hif1	y45	UNKNOWN	SYBR	None	0.0164515	0.0145024	0.0186626	20.4394	20.5052	0.0774124		-0.85505	0.065525			5.92563	TRUE	0.693109	TRUE	3	13	1	81.8499				N	N	N
C10	2o4k	fmo2	UNKNOWN	SYBR	None				22.1103	22.0041	0.0925962							TRUE	0.51344	TRUE	3	15	1	77.6764				N	N	N
C11	2o4k	cdc	UNKNOWN	SYBR	None	0.0178045	0.0160843	0.0197087	23.5488	23.5463	0.0768764		1.54226	0.0619921			5.81161	TRUE	0.831377	TRUE	3	17	1	79.485				N	N	N
C12	2o4k	y45	UNKNOWN	SYBR	None	0.0213388	0.0193396	0.0235447	20.6609	20.7738	0.0668258		-1.23031	0.0600192			5.55038	TRUE	0.693109	TRUE	3	13	1	81.572				N	N	N
D1	n2	fmo4	UNKNOWN	SYBR	None	1	0.743088	1.34574	22.1843	22.2651	0.148371		-5.11588	0.154296			0	TRUE	0.300913	TRUE	3	16	1	77.3894				N	N	N
D2	n2	cdc	UNKNOWN	SYBR	None	1	0.803782	1.24412	23.1855	23.1116	0.0879895		-4.26935	0.133266			0	TRUE	0.831377	TRUE	3	16	1	79.4759				N	N	N
D3	n2	y45	UNKNOWN	SYBR	None	1	0.78687	1.27086	20.5551	20.6003	0.171757		-6.78068	0.14624			0	TRUE	0.693109	TRUE	3	14	1	81.5741				N	N	N
D4	2ko crispr	fmo2	UNKNOWN	SYBR	None				32.3092	32.7677	1.03318							TRUE	0.51344	TRUE	3	26	1	77.5495				Y	N	N
D5	2ko crispr	cdc	UNKNOWN	SYBR	None	37.8209	11.9935	119.266	23.2929	23.2572	0.0312571		-9.51046	0.596779			-5.24111	TRUE	0.831377	TRUE	3	16	1	79.6211				N	N	N
D6	2ko crispr	y45	UNKNOWN	SYBR	None	40.4811	12.7608	128.418	20.5679	20.6478	0.110008		-12.1199	0.599878			-5.33918	TRUE	0.693109	TRUE	3	13	1	81.8571				N	N	N
D7	scl17	fmo2	UNKNOWN	SYBR	None				25.7993	25.7407	0.0818458							TRUE	0.51344	TRUE	3	19	1	77.6778				N	N	N
D8	scl17	cdc	UNKNOWN	SYBR	None	0.268515	0.242831	0.296915	23.387	23.3683	0.038587		-2.37243	0.052242			1.89693	TRUE	0.831377	TRUE	3	16	1	79.4664				N	N	N
D9	scl17	y45	UNKNOWN	SYBR	None	0.3051	0.275401	0.338002	20.6316	20.6727	0.0423883		-5.06804	0.053215			1.71264	TRUE	0.693109	TRUE	3	13	1	81.8499				N	N	N
D10	2o4k	fmo4	UNKNOWN	SYBR	None	1.32732e-06	6.53502e-07	2.69591e-06	36.4799	36.4112	0.630962		14.4072	0.368188			19.5231	TRUE	0.300913	TRUE	3	31	1	82.5952	72.3105			Y	N	Y
D11	2o4k	cdc	UNKNOWN	SYBR	None	0.0178045	0.0160843	0.0197087	23.5652	23.5463	0.0768764		1.54226	0.0619921			5.81161	TRUE	0.831377	TRUE	3	16	1	79.485				N	N	N
D12	2o4k	y45	UNKNOWN	SYBR	None	0.0213388	0.0193396	0.0235447	20.8136	20.7738	0.0668258		-1.23031	0.0600192			5.55038	TRUE	0.693109	TRUE	3	14	1	81.572				N	N	N
E1	n2	fmo4	UNKNOWN	SYBR	None	1	0.743088	1.34574	22.1747	22.2651	0.148371		-5.11588	0.154296			0	TRUE	0.300913	TRUE	3	17	1	77.3894				N	N	N
E2	n2	cdc	UNKNOWN	SYBR	None	1	0.803782	1.24412	23.2055	23.1116	0.0879895		-4.26935	0.133266			0	TRUE	0.831377	TRUE	3	16	1	79.4759				N	N	N
E3	n2	y45	UNKNOWN	SYBR	None	1	0.78687	1.27086	20.6022	20.6003	0.171757		-6.78068	0.14624			0	TRUE	0.693109	TRUE	3	13	1	81.5741				N	N	N
E4	2ko crispr	fmo2	UNKNOWN	SYBR	None				32.0431	32.7677	1.03318							TRUE	0.51344	TRUE	3	25	1	77.5495				Y	N	N
E5	2ko crispr	cdc	UNKNOWN	SYBR	None	37.8209	11.9935	119.266	23.2349	23.2572	0.0312571		-9.51046	0.596779			-5.24111	TRUE	0.831377	TRUE	3	16	1	79.6211				N	N	N
E6	2ko crispr	y45	UNKNOWN	SYBR	None	40.4811	12.7608	128.418	20.6023	20.6478	0.110008		-12.1199	0.599878			-5.33918	TRUE	0.693109	TRUE	3	13	1	81.8571				N	N	N
E7	scl17	fmo2	UNKNOWN	SYBR	None				25.7756	25.7407	0.0818458							TRUE	0.51344	TRUE	3	19	1	77.6778				N	N	N
E8	scl17	cdc	UNKNOWN	SYBR	None	0.268515	0.242831	0.296915	23.3239	23.3683	0.038587		-2.37243	0.052242			1.89693	TRUE	0.831377	TRUE	3	16	1	79.4664				N	N	N
E9	scl17	y45	UNKNOWN	SYBR	None	0.3051	0.275401	0.338002	20.6702	20.6727	0.0423883		-5.06804	0.053215			1.71264	TRUE	0.693109	TRUE	3	13	1	81.8499				N	N	N
E10	2o4k	fmo4	UNKNOWN	SYBR	None	1.32732e-06	6.53502e-07	2.69591e-06	35.7488	36.4112	0.630962		14.4072	0.368188			19.5231	TRUE	0.300913	TRUE	3	30	1	77.3783				Y	N	N
E11	2o4k	cdc	UNKNOWN	SYBR	None	0.0178045	0.0160843	0.0197087	23.655	23.5463	0.0768764		1.54226	0.0619921			5.81161	TRUE	0.831377	TRUE	3	16	1	79.485				N	N	N
E12	2o4k	y45	UNKNOWN	SYBR	None	0.0213388	0.0193396	0.0235447	20.8168	20.7738	0.0668258		-1.23031	0.0600192			5.55038	TRUE	0.693109	TRUE	3	14	1	81.572				N	N	N
F1	n2	fmo4	UNKNOWN	SYBR	None	1	0.743088	1.34574	22.4363	22.2651	0.148371		-5.11588	0.154296			0	TRUE	0.300913	TRUE	3	16	1	77.3894				N	N	N
F2	n2	cdc	UNKNOWN	SYBR	None	1	0.803782	1.24412	23.1307	23.1116	0.0879895		-4.26935	0.133266			0	TRUE	0.831377	TRUE	3	16	1	79.4759				N	N	N
F3	n2	y45	UNKNOWN	SYBR	None	1	0.78687	1.27086	20.9289	20.6003	0.171757		-6.78068	0.14624			0	TRUE	0.693109	TRUE	3	13	1	81.5741				N	Y	N
F4	2ko crispr	fmo2	UNKNOWN	SYBR	None				33.9508	32.7677	1.03318							TRUE	0.51344	TRUE	3	27	1	77.5495				Y	N	N
F5	2ko crispr	cdc	UNKNOWN	SYBR	None	37.8209	11.9935	119.266	23.2439	23.2572	0.0312571		-9.51046	0.596779			-5.24111	TRUE	0.831377	TRUE	3	16	1	79.6211				N	N	N
F6	2ko crispr	y45	UNKNOWN	SYBR	None	40.4811	12.7608	128.418	20.7733	20.6478	0.110008		-12.1199	0.599878			-5.33918	TRUE	0.693109	TRUE	3	13	1	81.7081				N	N	N
F7	scl17	fmo2	UNKNOWN	SYBR	None				25.6472	25.7407	0.0818458							TRUE	0.51344	TRUE	3	19	1	77.6778				N	N	N
F8	scl17	cdc	UNKNOWN	SYBR	None	0.268515	0.242831	0.296915	23.3939	23.3683	0.038587		-2.37243	0.052242			1.89693	TRUE	0.831377	TRUE	3	16	1	79.4664				N	N	N
F9	scl17	y45	UNKNOWN	SYBR	None	0.3051	0.275401	0.338002	20.7162	20.6727	0.0423883		-5.06804	0.053215			1.71264	TRUE	0.693109	TRUE	3	13	1	81.8499				N	N	N
F10	2o4k	fmo4	UNKNOWN	SYBR	None	1.32732e-06	6.53502e-07	2.69591e-06	37.0051	36.4112	0.630962		14.4072	0.368188			19.5231	TRUE	0.300913	TRUE	3	31	1	81.7009				Y	N	N
F11	2o4k	cdc	UNKNOWN	SYBR	None	0.0178045	0.0160843	0.0197087	23.5399	23.5463	0.0768764		1.54226	0.0619921			5.81161	TRUE	0.831377	TRUE	3	16	1	79.485				N	N	N
F12	2o4k	y45	UNKNOWN	SYBR	None	0.0213388	0.0193396	0.0235447	20.8461	20.7738	0.0668258		-1.23031	0.0600192			5.55038	TRUE	0.693109	TRUE	3	13	1	81.572				N	N	N
Analysis Type	Singleplex
Endogenous Control	fmo2
RQ Min/Max Confidence Level	95.0
Reference Sample	n2

## Sheet: Sheet1
2O4K	Ct mean	Ct SD	Geo Mean
cdc-42	23.5463	0.0768764	22.1166	0.122934						Worm Strain	Primer	Fold Change
Y45F10D.4	20.7738	0.0668258								FMO-2 KO	fmo-2	0.03
fmo-2	22.0041	0.0925962
										FMO-2 KO Crispr	fmo-2	0.026
										HIF-1	fmo-2	64.13
										SCL-17	fmo-2	3.48
N2
cdc-42	23.1116	0.0879895	21.8199	0.149767		fmo-2
Y45F10D.4	20.6003	0.171757
fmo-2	27.381	0.222279					Geo Mean Fold Change
					fmo-2	-5.67369	51.0447
2O4K	Ct mean	Ct SD	Geo Mean
cdc-42	23.5463	0.0768764	22.1166	0.0716751
Y45F10D.4	20.7738	0.0668258
fmo-4	36.4112	0.630962
										Worm Strain	Primer	Fold Change
N2
cdc-42	23.1116	0.0879895	21.8199	0.130887		fmo-4				FMO-2OE;4KO	fmo2	51.04
Y45F10D.4	20.6003	0.171757									fmo4	6.77527e-05
fmo-4	22.2651	0.148371					Geo Mean Fold Change
					fmo-4	13.8494	6.77527e-05
2KO	Ct mean	Ct SD	Geo Mean
cdc-42	23.2737	0.580829	21.7829	0.147088
Y45F10D.4	20.3876	0.0372483
fmo-2	32.4236	0.541533
N2
cdc-42	23.1116	0.0879895	21.8199	0.149767		fmo-2
Y45F10D.4	20.6003	0.171757
fmo-2	27.381	0.222279					Geo Mean Fold Change
					fmo-2	5.07951	0.0295744
2KO Crispr	Ct mean	Ct SD	Geo Mean
cdc-42	23.2572	0.0312571	21.9137	0.152586
Y45F10D.4	20.6478	0.110008
fmo-2	32.7677	1.03318
N2
cdc-42	23.1116	0.0879895	21.8199	0.149767		fmo-2
Y45F10D.4	20.6003	0.171757
fmo-2	27.381	0.222279					Geo Mean Fold Change
					fmo-2	5.29285	0.025509
hif1	Ct mean	Ct SD	Geo Mean
cdc-42	23.1809	0.053344	21.802	0.0642611
Y45F10D.4	20.5052	0.0774124
fmo-2	21.3602	0.0829935
N2
cdc-42	23.1116	0.0879895	21.8199	0.149767		fmo-2
Y45F10D.4	20.6003	0.171757
fmo-2	27.381	0.222279					Geo Mean Fold Change
					fmo-2	-6.00294	64.1306
scl	Ct mean	Ct SD	Geo Mean
cdc-42	23.3683	0.038587	21.9792	0.0511557
Y45F10D.4	20.6727	0.0423883
fmo-2	25.7407	0.0818458
N2
cdc-42	23.1116	0.0879895	21.8199	0.149767		fmo-2
Y45F10D.4	20.6003	0.171757
fmo-2	27.381	0.222279					Geo Mean Fold Change
					fmo-2	-1.7996	3.48123
															#NUM!	#DIV/0!
															#NUM!	#DIV/0!
