# Supplementary material for: fmo-4 promotes longevity and stress resistance via ER to mitochondria calcium regulation in C. elegans
Source: eLife journal article supplement (doi:10.7554/elife.99971), 2024-08-27
Supplement: supp7 [file 26JULY2023 fmo2 fmo4 qpcr tuckowski_data.xls]

## Sheet: Results
Block Type	96well
Chemistry	SYBR_GREEN
Experiment File Name	C:\Applied Biosystems\StepOne Software v2.3\experiments\Tuckowski\26JULY2023 fmo2 fmo4 qpcr tuckowski.eds
Experiment Run End Time	2023-07-26 10:30:35 AM EDT
Instrument Type	steponeplus
Passive Reference	ROX
Well	Sample Name	Target Name	Task	Reporter	Quencher	RQ	RQ Min	RQ Max	Cт	Cт Mean	Cт SD	ΔCт	ΔCт Mean	ΔCт SE	HK Control ΔCт Mean	HK Control ΔCт SE	ΔΔCт	Automatic Ct Threshold	Ct Threshold	Automatic Baseline	Baseline Start	Baseline End	Efficiency	Tm1	Tm2	Tm3	Comments	HIGHSD	OUTLIERRG
A1	n2	fmo2	UNKNOWN	SYBR	None	1	0.738827	1.3535	29.0309	28.9423	0.111123		3.54387	0.184677			0	TRUE	0.336433	TRUE	3	23	1	77.8408				N	N
A2	n2	cdc	UNKNOWN	SYBR	None				24.564	25.3984	0.424189							TRUE	0.606362	TRUE	3	17	1	79.6285				N	Y
A3	n2	y45	UNKNOWN	SYBR	None	1	0.76343	1.30988	19.8273	19.9221	0.0578771		-5.47629	0.174779			0	TRUE	0.475492	TRUE	3	13	1	81.58				N	N
A4	4oe	fmo2	UNKNOWN	SYBR	None	1.90273	1.48946	2.43067	27.8611	27.9376	0.0981779		2.6158	0.149404			-0.928071	TRUE	0.336433	TRUE	3	22	1	77.5588				N	N
A5	4oe	cdc	UNKNOWN	SYBR	None				24.7695	25.3218	0.338602							TRUE	0.606362	TRUE	3	18	1	79.7759				N	N
A6	4oe	y45	UNKNOWN	SYBR	None	0.95148	0.768234	1.17844	19.8874	19.9172	0.021562		-5.40454	0.138514			0.0717551	TRUE	0.475492	TRUE	3	13	1	82.0102				N	N
A7	4ko	fmo2	UNKNOWN	SYBR	None	1.57763	1.20305	2.06884	28.4344	28.6213	0.183114		2.88612	0.165382			-0.657757	TRUE	0.336433	TRUE	3	23	1	77.8386				N	N
A8	4ko	cdc	UNKNOWN	SYBR	None				25.1461	25.7352	0.311522							TRUE	0.606362	TRUE	3	18	1	79.4774				N	Y
A9	4ko	y45	UNKNOWN	SYBR	None	0.973525	0.794155	1.19341	20.2995	20.2976	0.0852798		-5.43758	0.131858			0.03871	TRUE	0.475492	TRUE	3	13	1	81.709				N	N
A10	4oe 6.3	fmo2	UNKNOWN	SYBR	None	0.923401	0.805513	1.05854	29.392	29.4147	0.0261757		3.65884	0.083332			0.114971	TRUE	0.336433	TRUE	3	23	1	77.6862				N	N
A11	4oe 6.3	cdc	UNKNOWN	SYBR	None				25.4201	25.7559	0.200736							TRUE	0.606362	TRUE	3	18	1	79.3469				N	N
A12	4oe 6.3	y45	UNKNOWN	SYBR	None	1.21527	1.04039	1.41955	19.9647	19.9983	0.142925		-5.75757	0.1006			-0.281278	TRUE	0.475492	TRUE	3	12	1	81.5814				N	N
B1	n2	fmo2	UNKNOWN	SYBR	None	1	0.738827	1.3535	28.9784	28.9423	0.111123		3.54387	0.184677			0	TRUE	0.336433	TRUE	3	23	1	77.8408				N	N
B2	n2	cdc	UNKNOWN	SYBR	None				25.6722	25.3984	0.424189							TRUE	0.606362	TRUE	3	19	1	79.4795				N	N
B3	n2	y45	UNKNOWN	SYBR	None	1	0.76343	1.30988	19.9393	19.9221	0.0578771		-5.47629	0.174779			0	TRUE	0.475492	TRUE	3	13	1	81.58				N	N
B4	4oe	fmo2	UNKNOWN	SYBR	None	1.90273	1.48946	2.43067	28.0483	27.9376	0.0981779		2.6158	0.149404			-0.928071	TRUE	0.336433	TRUE	3	22	1	77.5588				N	N
B5	4oe	cdc	UNKNOWN	SYBR	None				25.1484	25.3218	0.338602							TRUE	0.606362	TRUE	3	18	1	79.627				N	N
B6	4oe	y45	UNKNOWN	SYBR	None	0.95148	0.768234	1.17844	19.9199	19.9172	0.021562		-5.40454	0.138514			0.0717551	TRUE	0.475492	TRUE	3	13	1	81.8612				N	N
B7	4ko	fmo2	UNKNOWN	SYBR	None	1.57763	1.20305	2.06884	28.8003	28.6213	0.183114		2.88612	0.165382			-0.657757	TRUE	0.336433	TRUE	3	23	1	77.6896				N	N
B8	4ko	cdc	UNKNOWN	SYBR	None				25.6372	25.7352	0.311522							TRUE	0.606362	TRUE	3	19	1	79.4774				N	N
B9	4ko	y45	UNKNOWN	SYBR	None	0.973525	0.794155	1.19341	20.2505	20.2976	0.0852798		-5.43758	0.131858			0.03871	TRUE	0.475492	TRUE	3	14	1	81.709				N	N
B10	4oe 6.3	fmo2	UNKNOWN	SYBR	None	0.923401	0.805513	1.05854	29.4088	29.4147	0.0261757		3.65884	0.083332			0.114971	TRUE	0.336433	TRUE	3	24	1	77.6862				N	N
B11	4oe 6.3	cdc	UNKNOWN	SYBR	None				25.6434	25.7559	0.200736							TRUE	0.606362	TRUE	3	18	1	79.3469				N	N
B12	4oe 6.3	y45	UNKNOWN	SYBR	None	1.21527	1.04039	1.41955	19.9126	19.9983	0.142925		-5.75757	0.1006			-0.281278	TRUE	0.475492	TRUE	3	13	1	81.5814				N	N
C1	n2	fmo2	UNKNOWN	SYBR	None	1	0.738827	1.3535	28.8176	28.9423	0.111123		3.54387	0.184677			0	TRUE	0.336433	TRUE	3	23	1	77.8408				N	N
C2	n2	cdc	UNKNOWN	SYBR	None				25.3726	25.3984	0.424189							TRUE	0.606362	TRUE	3	18	1	79.4795				N	N
C3	n2	y45	UNKNOWN	SYBR	None	1	0.76343	1.30988	19.8812	19.9221	0.0578771		-5.47629	0.174779			0	TRUE	0.475492	TRUE	3	13	1	81.58				N	N
C4	4oe	fmo2	UNKNOWN	SYBR	None	1.90273	1.48946	2.43067	27.9033	27.9376	0.0981779		2.6158	0.149404			-0.928071	TRUE	0.336433	TRUE	3	22	1	77.5588				N	N
C5	4oe	cdc	UNKNOWN	SYBR	None				25.2518	25.3218	0.338602							TRUE	0.606362	TRUE	3	18	1	79.627				N	N
C6	4oe	y45	UNKNOWN	SYBR	None	0.95148	0.768234	1.17844	19.9318	19.9172	0.021562		-5.40454	0.138514			0.0717551	TRUE	0.475492	TRUE	3	13	1	81.8612				N	N
C7	4ko	fmo2	UNKNOWN	SYBR	None	1.57763	1.20305	2.06884	28.6292	28.6213	0.183114		2.88612	0.165382			-0.657757	TRUE	0.336433	TRUE	3	23	1	77.5407				N	N
C8	4ko	cdc	UNKNOWN	SYBR	None				25.8323	25.7352	0.311522							TRUE	0.606362	TRUE	3	19	1	79.4774				N	N
C9	4ko	y45	UNKNOWN	SYBR	None	0.973525	0.794155	1.19341	20.2558	20.2976	0.0852798		-5.43758	0.131858			0.03871	TRUE	0.475492	TRUE	3	14	1	81.709				N	N
C10	4oe 6.3	fmo2	UNKNOWN	SYBR	None	0.923401	0.805513	1.05854	29.4433	29.4147	0.0261757		3.65884	0.083332			0.114971	TRUE	0.336433	TRUE	3	24	1	77.6862				N	N
C11	4oe 6.3	cdc	UNKNOWN	SYBR	None				25.8014	25.7559	0.200736							TRUE	0.606362	TRUE	3	19	1	79.3469				N	N
C12	4oe 6.3	y45	UNKNOWN	SYBR	None	1.21527	1.04039	1.41955	19.9049	19.9983	0.142925		-5.75757	0.1006			-0.281278	TRUE	0.475492	TRUE	3	13	1	81.5814				N	N
D1	n2	fmo4	UNKNOWN	SYBR	None	1	0.744948	1.34237	21.8042	21.8618	0.0827436		-3.53663	0.179643			0	TRUE	0.18623	TRUE	3	16	1	77.2449				N	N
D2	n2	cdc	UNKNOWN	SYBR	None				25.5899	25.3984	0.424189							TRUE	0.606362	TRUE	3	18	1	79.4795				N	N
D3	n2	y45	UNKNOWN	SYBR	None	1	0.76343	1.30988	19.9463	19.9221	0.0578771		-5.47629	0.174779			0	TRUE	0.475492	TRUE	3	13	1	81.58				N	N
D4	4oe	fmo4	UNKNOWN	SYBR	None	91.8298	51.1841	164.753	14.9565	15.2642	0.569388		-10.0575	0.356618			-6.52089	TRUE	0.18623	TRUE	3	10	1	77.112				Y	N
D5	4oe	cdc	UNKNOWN	SYBR	None				25.4698	25.3218	0.338602							TRUE	0.606362	TRUE	3	18	1	79.478				N	N
D6	4oe	y45	UNKNOWN	SYBR	None	0.95148	0.768234	1.17844	19.9118	19.9172	0.021562		-5.40454	0.138514			0.0717551	TRUE	0.475492	TRUE	3	13	1	81.7123				N	N
D7	4ko	fmo4	UNKNOWN	SYBR	None	0.00438478	0.00352814	0.00544941	30.0191	30.0319	0.0651245		4.29665	0.13262			7.83328	TRUE	0.18623	TRUE	3	25	1	77.2427				N	N
D8	4ko	cdc	UNKNOWN	SYBR	None				25.8931	25.7352	0.311522							TRUE	0.606362	TRUE	3	19	1	79.4774				N	N
D9	4ko	y45	UNKNOWN	SYBR	None	0.973525	0.794155	1.19341	20.4637	20.2976	0.0852798		-5.43758	0.131858			0.03871	TRUE	0.475492	TRUE	3	14	1	81.709				N	N
D10	4oe 6.3	fmo4	UNKNOWN	SYBR	None	44.5988	36.665	54.2493	16.5965	16.7403	0.15067		-9.01556	0.119512			-5.47893	TRUE	0.18623	TRUE	3	11	1	77.2392				N	N
D11	4oe 6.3	cdc	UNKNOWN	SYBR	None				25.9341	25.7559	0.200736							TRUE	0.606362	TRUE	3	19	1	79.3469				N	N
D12	4oe 6.3	y45	UNKNOWN	SYBR	None	1.21527	1.04039	1.41955	19.9838	19.9983	0.142925		-5.75757	0.1006			-0.281278	TRUE	0.475492	TRUE	3	14	1	81.5814				N	N
E1	n2	fmo4	UNKNOWN	SYBR	None	1	0.744948	1.34237	21.8246	21.8618	0.0827436		-3.53663	0.179643			0	TRUE	0.18623	TRUE	3	16	1	77.2449				N	N
E2	n2	cdc	UNKNOWN	SYBR	None				25.6772	25.3984	0.424189							TRUE	0.606362	TRUE	3	19	1	79.4795				N	N
E3	n2	y45	UNKNOWN	SYBR	None	1	0.76343	1.30988	19.9888	19.9221	0.0578771		-5.47629	0.174779			0	TRUE	0.475492	TRUE	3	13	1	81.58				N	N
E4	4oe	fmo4	UNKNOWN	SYBR	None	91.8298	51.1841	164.753	14.915	15.2642	0.569388		-10.0575	0.356618			-6.52089	TRUE	0.18623	TRUE	3	9	1	77.112				Y	N
E5	4oe	cdc	UNKNOWN	SYBR	None				25.6151	25.3218	0.338602							TRUE	0.606362	TRUE	3	18	1	79.478				N	N
E6	4oe	y45	UNKNOWN	SYBR	None	0.95148	0.768234	1.17844	19.9036	19.9172	0.021562		-5.40454	0.138514			0.0717551	TRUE	0.475492	TRUE	3	13	1	81.7123				N	N
E7	4ko	fmo4	UNKNOWN	SYBR	None	0.00438478	0.00352814	0.00544941	30.1024	30.0319	0.0651245		4.29665	0.13262			7.83328	TRUE	0.18623	TRUE	3	25	1	77.2427				N	N
E8	4ko	cdc	UNKNOWN	SYBR	None				25.9296	25.7352	0.311522							TRUE	0.606362	TRUE	3	19	1	79.3284				N	N
E9	4ko	y45	UNKNOWN	SYBR	None	0.973525	0.794155	1.19341	20.2869	20.2976	0.0852798		-5.43758	0.131858			0.03871	TRUE	0.475492	TRUE	3	14	1	81.709				N	N
E10	4oe 6.3	fmo4	UNKNOWN	SYBR	None	44.5988	36.665	54.2493	16.7275	16.7403	0.15067		-9.01556	0.119512			-5.47893	TRUE	0.18623	TRUE	3	11	1	77.2392				N	N
E11	4oe 6.3	cdc	UNKNOWN	SYBR	None				25.9605	25.7559	0.200736							TRUE	0.606362	TRUE	3	19	1	79.3469				N	N
E12	4oe 6.3	y45	UNKNOWN	SYBR	None	1.21527	1.04039	1.41955	20.2835	19.9983	0.142925		-5.75757	0.1006			-0.281278	TRUE	0.475492	TRUE	3	14	1	81.5814				N	Y
F1	n2	fmo4	UNKNOWN	SYBR	None	1	0.744948	1.34237	21.9566	21.8618	0.0827436		-3.53663	0.179643			0	TRUE	0.18623	TRUE	3	16	1	77.2449				N	N
F2	n2	cdc	UNKNOWN	SYBR	None				25.5147	25.3984	0.424189							TRUE	0.606362	TRUE	3	18	1	79.4795				N	N
F3	n2	y45	UNKNOWN	SYBR	None	1	0.76343	1.30988	19.9498	19.9221	0.0578771		-5.47629	0.174779			0	TRUE	0.475492	TRUE	3	13	1	81.58				N	N
F4	4oe	fmo4	UNKNOWN	SYBR	None	91.8298	51.1841	164.753	15.9213	15.2642	0.569388		-10.0575	0.356618			-6.52089	TRUE	0.18623	TRUE	3	11	1	77.112				Y	N
F5	4oe	cdc	UNKNOWN	SYBR	None				25.6758	25.3218	0.338602							TRUE	0.606362	TRUE	3	19	1	79.478				N	N
F6	4oe	y45	UNKNOWN	SYBR	None	0.95148	0.768234	1.17844	19.9488	19.9172	0.021562		-5.40454	0.138514			0.0717551	TRUE	0.475492	TRUE	3	13	1	81.7123				N	N
F7	4ko	fmo4	UNKNOWN	SYBR	None	0.00438478	0.00352814	0.00544941	29.974	30.0319	0.0651245		4.29665	0.13262			7.83328	TRUE	0.18623	TRUE	3	25	1	77.2427				N	N
F8	4ko	cdc	UNKNOWN	SYBR	None				25.9729	25.7352	0.311522							TRUE	0.606362	TRUE	3	19	1	79.4774				N	N
F9	4ko	y45	UNKNOWN	SYBR	None	0.973525	0.794155	1.19341	20.2292	20.2976	0.0852798		-5.43758	0.131858			0.03871	TRUE	0.475492	TRUE	3	13	1	81.709				N	N
F10	4oe 6.3	fmo4	UNKNOWN	SYBR	None	44.5988	36.665	54.2493	16.897	16.7403	0.15067		-9.01556	0.119512			-5.47893	TRUE	0.18623	TRUE	3	11	1	77.2392				N	N
F11	4oe 6.3	cdc	UNKNOWN	SYBR	None				25.7758	25.7559	0.200736							TRUE	0.606362	TRUE	3	19	1	79.3469				N	N
F12	4oe 6.3	y45	UNKNOWN	SYBR	None	1.21527	1.04039	1.41955	19.9403	19.9983	0.142925		-5.75757	0.1006			-0.281278	TRUE	0.475492	TRUE	3	13	1	81.5814				N	N
Analysis Type	Singleplex
Endogenous Control	cdc
RQ Min/Max Confidence Level	95.0
Reference Sample	n2

## Sheet: Sheet1
4OE	Ct mean	Ct SD	Geo Mean
cdc-42	25.3218	0.338602	22.4575	0.156687
Y45F10D.4	19.9172	0.021562
fmo-2	27.9376	0.0981779
										FMO-4OE	FMO2	1.96
											FMO4	94.41
										4OE Hyp Specific	FMO2	0.83
											FMO4	40.02
										FMO-4KO	FMO2	1.6
											FMO4	0.0044
N2
cdc-42	25.3984	0.424189	22.4942	0.13973		fmo-2
Y45F10D.4	19.9221	0.0578771
fmo-2	28.9423	0.111123					Geo Mean Fold Change
					fmo-2	-0.967995	1.95612
4OE	Ct mean	Ct SD	Geo Mean
cdc-42	25.3218	0.338602	22.4575	0.0854455
Y45F10D.4	19.9172	0.021562
fmo-4	15.2642	0.569388
N2
cdc-42	25.3984	0.424189	22.4942	0.126649		fmo-4
Y45F10D.4	19.9221	0.0578771
fmo-4	21.8618	0.0827436					Geo Mean Fold Change
					fmo-4	-6.56081	94.4063
4OE 6.3	Ct mean	Ct SD	Geo Mean
cdc-42	25.7559	0.200736	22.6952	0.169382
Y45F10D.4	19.9983	0.142925
fmo-2	29.4147	0.0261757
N2
cdc-42	25.3984	0.424189	22.4942	0.13973		fmo-2
Y45F10D.4	19.9221	0.0578771
fmo-2	28.9423	0.111123					Geo Mean Fold Change
					fmo-2	0.271421	0.828503
4OE 6.3	Ct mean	Ct SD	Geo Mean
cdc-42	25.7559	0.200736	22.6952	0.1629
Y45F10D.4	19.9983	0.142925
fmo-4	16.7403	0.15067
N2
cdc-42	25.3984	0.424189	22.4942	0.126649		fmo-4
Y45F10D.4	19.9221	0.0578771
fmo-4	21.8618	0.0827436					Geo Mean Fold Change
					fmo-4	-5.32248	40.0153
4KO	Ct mean	Ct SD	Geo Mean
cdc-42	25.7352	0.311522	22.8553	0.169441
Y45F10D.4	20.2976	0.0852798
fmo-2	28.6213	0.183114
N2
cdc-42	25.3984	0.424189	22.4942	0.13973		fmo-2
Y45F10D.4	19.9221	0.0578771
fmo-2	28.9423	0.111123					Geo Mean Fold Change
					fmo-2	-0.682012	1.60438
4KO	Ct mean	Ct SD	Geo Mean
cdc-42	25.7352	0.311522	22.8553	0.120049
Y45F10D.4	20.2976	0.0852798
fmo-4	30.0319	0.0651245
N2
cdc-42	25.3984	0.424189	22.4942	0.156687		fmo-4
Y45F10D.4	19.9221	0.0578771
fmo-4	21.8618	0.0827436					Geo Mean Fold Change
					fmo-4	7.80903	0.00445911
