# Supplementary material for: fmo-4 promotes longevity and stress resistance via ER to mitochondria calcium regulation in C. elegans
Source: eLife. 2025 Feb 14;13:RP99971. doi: 10.7554/eLife.99971 (PMC11828484; doi:10.7554/eLife.99971)
Supplement: Supplementary file 1. — All replicate data can be found in Supplementary file 7. [file elife-99971-supp1.xlsx]

## Sheet: qPCR Values
Worm Strain	qPCR Primer	Fold Change	Replicate #
fmo-2OE;4KO	fmo-2	51	1
fmo-2OE;4KO	fmo-2	50.7	2
fmo-2OE;4KO	fmo-2	45.7	3
fmo-2OE;4KO	fmo-4	7e-05	1
fmo-2OE;4KO	fmo-4	0.00043	2
fmo-2OE;4KO	fmo-4	5e-05	3
fmo-2OE;4OE	fmo-2	82.6	1
fmo-2OE;4OE	fmo-2	152.7	2
fmo-2OE;4OE	fmo-2	63.6	3
fmo-2OE;4OE	fmo-4	39	1
fmo-2OE;4OE	fmo-4	42.1	2
fmo-2OE;4OE	fmo-4	29.3	3
fmo-4OE;2KO	fmo-2	0.009	1
fmo-4OE;2KO	fmo-2	0.03	2
fmo-4OE;2KO	fmo-2	0.002	3
fmo-4OE;2KO	fmo-4	39	1
fmo-4OE;2KO	fmo-4	76	2
fmo-4OE;2KO	fmo-4	45.5	3
fmo-4OE ubiq	fmo-4	139.7	1
fmo-4OE ubiq	fmo-4	164.4	2
fmo-4OE ubiq	fmo-4	94.41	3
fmo-4OEHyp	fmo-4	44.51	1
fmo-4OEHyp	fmo-4	46.6	2
fmo-4OEHyp	fmo-4	44.4	3
fmo-4 KO	fmo-4	3e-05	1
fmo-4 KO	fmo-4	3e-06	2
fmo-4 KO	fmo-4	4e-05	3
