# Supplementary material for: fmo-4 promotes longevity and stress resistance via ER to mitochondria calcium regulation in C. elegans
Source: eLife. 2025 Feb 14;13:RP99971. doi: 10.7554/eLife.99971 (PMC11828484; doi:10.7554/eLife.99971)
Supplement: Supplementary file 2. [file elife-99971-supp2.xlsx]

## Sheet: FMO4OE RNAseq
WBGene00007063	fmo-4 OE	Log2Fc/N2	Fc/N2	pval	padj	Gene Name	Concise Description	Notes
WBGene00007064	C03A7.14	6.95253	123.857	1.57893e-05	0.00760481	abu-8	abu-8 encodes a transmembrane protein with a predicted signal sequence, a glutamine\/asparagine-rich domain and multiple cysteine-rich repeats (DUF139)\; abu-8 expression is induced by blockage of the unfolded-protein response in the endoplasmic reticulum, and ABU-8 may help protect the organism from damage by improperly folded nascent protein.
NA	T25E4.1	6.01187	64.5289	0.000353111	1	T25E4.1	N.A.
WBGene00199694	T06E4.9	5.63854	49.816	0.0047808	1	T06E4.9	N.A.
WBGene00003525	T18H9.1	5.41139	42.5591	0.00271971	1	grd-6	grd-6 encodes a hedgehog-like protein, with an N-terminal signalsequence, a central low-complexity proline-rich domain, and a C-terminalGround domain\; GRD-6 is expressed in hypodermis and in various neurons,in both head and tail, and the PVT interneuron\; the Ground domain ispredicted to form a cysteine-crosslinked protein involved inintercellular signalling, and it has subtle similarity to the …
WBGene00004098	C03A7.4	5.10797	34.4866	0.0186045	1	abu-15	The protein product of this gene is predicted to contain a glutamine\/asparagine (Q\/N)-rich ('prion') domain, by the algorithm of Michelitsch and Weissman (as of the WS77 release of WormBase, i.e., in wormpep77).
WBGene00044644	F22F7.6	5.09901	34.2733	0.0185231	1	bgnt-1.2	N.A.
WBGene00000718	K10C2.5	5.08476	33.9364	0.0048173	1	grl-6	grl-6 encodes a hedgehog-like protein, with an N-terminal signalsequence, a central proline-rich low-complexity region, and a C-terminalGround-like (Grl) domain\; GRL-6 is expressed in larval intestine, amphidsocket cells, and neurons\; the Grl domain is predicted to form acysteine-crosslinked protein involved in intercellular signalling, andit has subtle similarity to the N-terminal Hedge domain…
WBGene00015063	T01D3.2	5.06009	33.3609	0.00630763	1	hlh-34	N.A.
WBGene00050927	C12D8.14	4.95864	31.0957	0.0268625	1	fipr-4	N.A.
WBGene00007121	W03D2.9	4.82066	28.2593	0.0122713	1	W03D2.9	N.A.
WBGene00015096	K01D12.1	4.80478	27.9502	0.000269729	0.0386974	K01D12.1	N.A.
WBGene00006538	Y57G11A.207	4.78987	27.6628	0.0384356	1	21ur-9869	N.A.
WBGene00006745	F43G6.16	4.78775	27.6221	0.0371405	1	F43G6.16	N.A.
WBGene00007139	T06E4.14	4.66914	25.442	0.00545944	1	T06E4.14	N.A.
WBGene00001948	W04E12.9	4.53993	23.2625	0.0102676	1	W04E12.9	N.A.
WBGene00015135	AC3.4	4.53989	23.2618	0.0103986	1	pqn-2	The protein product of this gene is predicted to contain a glutamine\/asparagine (Q\/N)-rich ('prion') domain, by the algorithm of Michelitsch and Weissman (as of the WS77 release of WormBase, i.e., in wormpep77).
WBGene00206462	C03A7.7	4.46566	22.0952	0.0206689	1	abu-6	abu-6 encodes a transmembrane protein with a predicted signal sequence, a glutamine\/asparagine-rich domain and multiple cysteine-rich repeats (DUF139)\; abu-6 is a member of a paralogous group of genes whose expression is transcriptionally up-regulated during times of cuticle synthesis, such as during late embryogenesis and during the molts\; abu-6 expression is induced by blockage of the unfold…
WBGene00007170	T16G1.8	4.43513	21.6325	0.0291694	1	grl-2	grl-2 encodes a hedgehog-like protein, with an N-terminal signalsequence, a central proline-rich low-complexity region, and a C-terminalGround-like (Grl) domain\; GRL-2 is expressed in neurons, amphid socketcells, and other cells\; the Grl domain is predicted to form acysteine-crosslinked protein involved in intercellular signalling, andit has subtle similarity to the N-terminal Hedge domain of H…
WBGene00015168	Y110A2AL.1	4.43499	21.6304	0.00930196	1	Y110A2AL.1	N.A.
WBGene00015171	Y6G8.1	4.40911	21.2459	0.034959	1	srz-45	N.A.
WBGene00001638	F38A1.7	4.38167	20.8456	0.0430279	1	clec-168	N.A.
WBGene00007191	C05G5.6	4.34427	20.3121	0.0390181	1	let-7	let-7 encodes a 21-nucleotide microRNA (also known as a small temporal RNA, or stRNA) that is conserved in bilateral animal species (including vertebrates, ascidians, hemichordates, molluscs, annelids and arthropods), but is not found in cnidarians, poriferans, fungi, plants, protists, archaea, or bacteria\; let-7 is required for the transition from late larval to adult cell fates, and for larval…
WBGene00015218	ZK1010.6	4.31972	19.9694	0.0390315	1	ZK1010.6	N.A.
WBGene00001432	Y46G5A.39	4.21141	18.5251	0.0493543	1	Y46G5A.39	N.A.
WBGene00001858	F39E9.14	4.20949	18.5005	0.0119828	1	F39E9.14	N.A.
WBGene00005017	C44B11.1	4.1628	17.9113	0.0216555	1	C44B11.1	N.A.
WBGene00015298	F33A8.9	4.13782	17.6038	0.0148481	1	col-83	N.A.
WBGene00015311	F33E2.3	4.11093	17.2788	0.0171396	1	clec-102	N.A.
WBGene00000170	R03C1.1	4.10296	17.1836	0.0196148	1	R03C1.1	N.A.
WBGene00015339	C02E7.6	4.04362	16.4911	0.0268882	0.43636	C02E7.6	N.A.
WBGene00015340	D1007.1	4.04139	16.4657	0.020329	1	ceh-17	ceh-17 encodes a phox-2-like homeodomain protein that is a member of the Q50 paired-like class of homeobox proteins and the vertebrate orthologue of Phox2a and Phox2b\; that affects ALA and SIA axonal development\; ceh-17 affects ALA and SIA antero-posterior axonal growth and navigation, and is expressed in five neurons of the ring ganglia (ALA and the 4 SIAs) with strongest expression in embryos…
WBGene00006643	Y69A2AL.1	4.02162	16.2416	0.00440917	1	grd-16	N.A.
WBGene00015356	C08E3.3	3.99945	15.994	0.0328635	1	bath-33	N.A.
WBGene00007266	Y105C5B.14	3.98174	15.7987	0.00476679	1	Y105C5B.14	N.A.
WBGene00000031	R186.2	3.93719	15.3184	0.0252608	1	srd-35	N.A.
WBGene00004099	Y45F3A.8	3.89004	14.8258	0.0267171	1	Y45F3A.8	N.A.
WBGene00000029	F49D11.6	3.84091	14.3295	0.0279725	1	F49D11.6	N.A.
WBGene00007271	F56H6.2	3.8331	14.2521	0.043567	1	F56H6.2	N.A.
NA	F18C5.9	3.77395	13.6796	0.0110786	1	F18C5.9	N.A.
WBGene00015395	C46E10.5	3.77114	13.6529	0.000356333	1	fbxc-53	N.A.
WBGene00007286	F33H12.7	3.7468	13.4246	0.0482697	1	F33H12.7	N.A.
WBGene00001119	Y82E9BR.20	3.7272	13.2434	0.0402841	1	Y82E9BR.20	N.A.
WBGene00000503	F08H9.4	3.68967	12.9033	0.0421648	1	F08H9.4	F08H9.4 encodes a heat shock protein (HSP) of the HSP16 class\; unlike most HSP16s in C. elegans, it is specifically expressed in a particular tissue (the excretory canal and ventral nerve-cord neurons), and its expression is only mildly induced by heat shock\; however, F08H9.4 expression is increased by heat shock, is induced in a new tissue type (intestine) by heat shock, and probably aids heat…
WBGene00001204	F17B5.6	3.67032	12.7314	0.0467866	1	F17B5.6	N.A.
WBGene00015456	C24A8.6	3.6394	12.4615	0.0426707	0.545158	C24A8.6	N.A.
WBGene00007317	F55C5.11	3.62117	12.305	0.0495862	1	bnc-1	N.A.
WBGene00015472	F56A3.5	3.61546	12.2563	0.00160581	1	bro-1	bro-1 encodes an ortholog of human CBFB (OMIM:121360, mutated in acute myeloid leukemia and CBFB haploinsufficiency) and Drosophila BRO\/BGB\; BRO-1 is required for the normal proliferation and differentiation of seam cells, alae, and male tail rays\; bro-1 mutants exhibit defective seam cell division and differentiation, and males exhibit ray loss\; conversely, transgenic overexpression of BRO-1…
WBGene00002062	Y59E1A.2	3.54599	11.6802	0.00345646	0.145668	rgs-8.2	N.A.
WBGene00015474	Y57G11C.39	3.54076	11.6379	0.0183463	1	Y57G11C.39	N.A.
WBGene00015494	Y47D3B.6	3.51966	11.4689	1.72967e-05	0.00804357	Y47D3B.6	N.A.
WBGene00002285	T06E4.12	3.49499	11.2745	0.0325803	1	T06E4.12	N.A.
WBGene00007372	T05A7.3	3.4917	11.2488	0.0177982	1	T05A7.3	N.A.
WBGene00015541	F41F3.3	3.46201	11.0197	0.00489508	0.180121	F41F3.3	N.A.
WBGene00015547	F35D2.2	3.32754	10.0389	0.0130657	1	F35D2.2	N.A.
WBGene00001821	F43E2.9	3.304	9.87648	0.00995683	1	not found
WBGene00015569	B0222.7	3.30216	9.86391	0.00216333	0.110116	col-145	N.A.
WBGene00015576	Y38A10A.11	3.30184	9.86172	0.0464873	1	Y38A10A.11	N.A.
WBGene00003102	C01B12.1	3.24636	9.48969	0.0148386	0.317641	sqt-2	N.A.
WBGene00015595	C02E7.7	3.18461	9.09206	0.000905363	0.0682108	C02E7.7	N.A.
WBGene00015613	D2096.6	3.05443	8.30758	0.00247174	0.119147	D2096.6	N.A.
WBGene00044417	F33D4.6	3.02293	8.12818	0.00321813	0.138657	F33D4.6	N.A.
WBGene00015610	F09F9.2	3.01015	8.05646	0.000891921	0.0675756	F09F9.2	N.A.
WBGene00219217	ZK616.9	2.98916	7.94013	0.0221787	1	spp-7	spp-7 encodes an antimicrobial peptide that belongs to the SPP-protein family, called caenopores, with structural similarity to saposin-like proteins (SAPLIPs), the amoebapores and the mammalian NK-lysin and granulysin\; caenopores are part of the worm's innate immune system and interact with and eliminate bacteria via membrane pore-forming activity\; C. elegans has at least 33 putative SPP prote…
WBGene00007479	F35E12.2	2.96355	7.80044	0.00829561	1	F35E12.2	N.A.
WBGene00045322	H36L18.1	2.93497	7.64741	0.00362574	1	zmp-5	N.A.
WBGene00000616	ZK662.2	2.90711	7.50113	0.00339572	0.144463	ZK662.2	N.A.
WBGene00015664	F58H1.2	2.89451	7.43591	0.00466304	0.174683	F58H1.2	N.A.
WBGene00003380	B0391.14	2.8911	7.41836	0.0184476	1	B0391.14	N.A.
WBGene00000455	Y105C5B.29	2.8773	7.34775	0.0399293	1	hlh-32	hlh-32 encodes a basic helix-loop-helix (bHLH) transcription factor similarto the vertebrate Olig2 proteins that play a role in motoneuron andoligodendrocyte development\; genetic analyses suggest that, along withhlh-17, hlh-31 and vab-3, hlh-32 may play a redundant role in regulation of ventral cephalic sheath (CEPsh) glia function, as assayed by AWC axonaldefects\; an hlh-32::gfp promoter fusio…
WBGene00007531	C47F8.8	2.83116	7.11647	0.0366435	1	nhr-81	N.A.
WBGene00007541	F56D5.1	2.80438	6.98559	0.0217353	0.387215	col-121	col-121 encodes a cuticle collagen required for resistance to theendocrine disrupting chemical bisphenol A (BPA)\; col-121(nx3) andcol-121(RNAi) animals are hypersensitive to BPA, but are otherwisewild-type (e.g., they have normal body shape)\; BPA hypersensitivity hasalso been observed for dpy-2(e8), dpy-7(e88) and dpy-10(e128) mutants.
WBGene00000439	T28C6.4	2.80199	6.97403	0.0210074	0.376736	col-117	N.A.
WBGene00007560	T04C12.1	2.7903	6.91775	0.0325825	1	T04C12.1	N.A.
WBGene00015752	Y47D7A.15	2.78	6.8685	0.0313132	0.470914	Y47D7A.15	N.A.
WBGene00004104	W04C9.3	2.77595	6.84928	0.00129314	0.0880772	cutl-13	N.A.
WBGene00015779	H04M03.4	2.76484	6.79673	3.17682e-05	0.0115791	glf-1	glf-1 encodes a UDP-galactopyranose mutase predicted to synthesize galactofuranose (Gal(f)) as a nucleotide sugar (UDP-Gal(f))\; recombinant GLF-1 has biochemical activity either in vivo (expressed in E. coli) or in vitro\; orthologs of GLF-1 are found in the urochordates Halocynthia and Ciona.
WBGene00015781	C03C10.5	2.75686	6.75926	0.000199298	0.0319372	C03C10.5	N.A.
WBGene00000521	K08C9.4	2.73665	6.6652	0.00201117	0.106011	col-65	N.A.
WBGene00015824	T03G6.1	2.73	6.63457	6.9868e-05	0.0188448	T03G6.1	N.A.
WBGene00015830	C32B5.7	2.72851	6.62773	0.0201082	1	C32B5.7	N.A.
WBGene00015841	H10E21.4	2.71855	6.5821	0.0430144	1	H10E21.4	N.A.
WBGene00015868	C03G6.8	2.70575	6.52396	0.021759	1	nhr-147	N.A.
WBGene00219310	C14A4.9	2.7037	6.51472	0.0138651	1	C14A4.9	N.A.
WBGene00007642	C50B6.4	2.7005	6.50026	0.00263722	0.12264	col-161	N.A.
WBGene00219313	B0205.13	2.69344	6.46854	1.45712e-13	2.80725e-10	B0205.13	B0205.13 encodes a small, novel protein conserved in C. remanei and C. briggsae.
WBGene00007651	W04H10.5	2.68887	6.44807	0.00349011	0.146464	W04H10.5	N.A.
WBGene00001958	K08D12.4	2.68138	6.41471	0.00923166	1	K08D12.4	N.A.
WBGene00007675	F53E10.5	2.66159	6.32729	0.00532445	1	F53E10.5	N.A.
WBGene00044004	T23F1.5	2.64962	6.27501	0.0182805	0.353702	rocf-1	N.A.
WBGene00016067	F29C12.1	2.64639	6.26098	5.77303e-05	0.0173011	pqn-32	The protein product of this gene is predicted to contain a glutamine\/asparagine (Q\/N)-rich ('prion') domain, by the algorithm of Michelitsch and Weissman (as of the WS77 release of WormBase, i.e., in wormpep77).
WBGene00016071	EGAP7.1	2.63615	6.21671	0.0147562	0.316883	dpy-3	N.A.
WBGene00016072	C34D4.1	2.62538	6.17045	0.00769426	0.228055	maph-9	N.A.
WBGene00002233	Y54G2A.37	2.62114	6.15238	0.00111916	0.0786097	Y54G2A.37	N.A.
WBGene00016088	F36H5.3	2.58933	6.01819	0.00996435	1	math-28	N.A.
WBGene00004747	ZC404.1	2.56605	5.92185	0.0300312	1	ZC404.1	N.A.
WBGene00001006	F38B6.5	2.56338	5.91089	0.0250644	1	col-172	N.A.
WBGene00016106	Y75B8A.20	2.55967	5.89573	0.00720509	0.221844	grl-15	grl-15 encodes a hedgehog-like protein, with an N-terminal signalsequence, a central proline-rich low-complexity region, and a C-terminalGround-like (Grl) domain\; GRL-15 is expressed in the reproductivesystem, vulva, and larval hypodermis\; the Grl domain is predicted toform a cysteine-crosslinked protein involved in intercellularsignalling, and it has subtle similarity to the N-terminal Hedge d…
WBGene00005832	ZK1067.7	2.55164	5.86302	0.000787868	0.0639586	abu-14	The protein product of abu-14 is predicted to contain a glutamine\/asparagine (Q\/N)-rich ('prion') domain\; abu-14 is transcriptionally up-regulated during times of cuticle synthesis, such as in late embryogenesis and in the molts\; it is localized to the pharyngeal cuticle and is required for the function of the pharyngeal grinder.
WBGene00007741	F54E2.2	2.54273	5.82692	0.00415572	0.16151	F54E2.2	N.A.
WBGene00016146	F58E1.10	2.53575	5.79879	0.000963861	0.071421	fbxc-22	N.A.
WBGene00001719	F53F1.5	2.5311	5.78012	0.016461	0.335844	cut-2	cut-2 encodes a secreted protein which is a component of cuticlin, the insoluble residue of nematode cuticles\; CUT-2 is expressed during all developmental stages and contributes to the external cortical layer of the cuticle of all larval stages.
WBGene00007750	C01B10.5	2.51838	5.72937	0.0175298	0.347656	hil-7	hil-7 encodes an H1 linker histone.
WBGene00000463	T14F9.5	2.51797	5.72776	0.000251782	0.0373135	lin-32	lin-32 encodes a basic helix-loop-helix transcription factor that is required for development of several types of neurons, including the touch receptor neurons and the male sensory ray neurons.
WBGene00002827	F52E1.4	2.51162	5.7026	0.0443379	1	gcy-7	gcy-7 encodes a membrane guanylyl cyclase\; a gcy-7::gfp reporter is expressed asymmetrically in the ASEL sensory neuron.
WBGene00002213	F41G3.2	2.49296	5.62932	0.0258638	1	not found
WBGene00016273	Y45F10C.6	2.48857	5.61223	0.0026903	0.124153	Y45F10C.6	N.A.
WBGene00007855	R02F11.1	2.45377	5.47847	0.00497027	0.182144	R02F11.1	N.A.
WBGene00016295	ZC123.1	2.43118	5.39334	0.0069247	0.217684	ZC123.1	N.A.
WBGene00016307	ZK675.4	2.41578	5.33608	0.00763697	0.227448	ZK675.4	N.A.
WBGene00016300	Y57E12B.3	2.40282	5.28836	0.0146862	0.316883	lipl-6	N.A.
WBGene00004771	Y43F8C.4	2.40169	5.2842	0.0244816	0.412184	dyf-19	dyf-19 encodes the C. elegans ortholog of mammalian transition fibre protein FBF1 (Fas(TNFRSF6)-binding factor 1)\; DYF-19 is required for actively regulating transit of assembled intraflagellar transport (IFT) particles through the ciliary base, and thus for proper ciliogenesis\; DYF-19 physically interacts with DYF-11, a component of the IFT-B subcomplex orthologous to mammalian IFT54\; DYF-19 …
WBGene00006444	F17A9.3	2.39884	5.27379	0.00617802	0.20471	atf-8	N.A.
WBGene00000451	Y57A10C.10	2.38997	5.24145	0.0433822	1	Y57A10C.10	N.A.
WBGene00007900	Y17G9A.1	2.37832	5.19933	0.0333132	1	str-173	N.A.
WBGene00016355	F45C12.11	2.37035	5.17066	0.0398929	1	sdz-18	N.A.
WBGene00007904	W04G3.1	2.36987	5.16895	0.000871293	0.0663856	lpr-6	lpr-6 encodes one of seven C. elegans proteins related to the lipocalin family of structurally related, low molecular weight, secreted proteins that bind and transport lipophilic molecules and participate in intercellular signaling\; lpr-6 has been reported to be expressed in the amphid sensory neurons.
WBGene00016397	F40H3.3	2.3576	5.12519	0.0348425	1	F40H3.3	N.A.
WBGene00007934	T06E4.6	2.35106	5.10201	0.00528661	0.189112	col-146	N.A.
WBGene00001101	W02B8.5	2.34178	5.06928	0.0197878	1	hot-3	N.A.
WBGene00016422	F53C3.3	2.33419	5.04268	0.0207661	0.373671	F53C3.3	N.A.
WBGene00016457	T22H2.4	2.32733	5.01877	0.0299707	1	T22H2.4	N.A.
WBGene00194650	T21D12.7	2.30853	4.95376	0.0244093	0.411995	T21D12.7	N.A.
WBGene00007984	Y63D3A.3	2.30467	4.94053	6.91877e-07	0.000582761	fbxb-101	N.A.
WBGene00007985	F26A10.28	2.29622	4.91169	0.0420661	1	F26A10.28	N.A.
WBGene00004372	F58F6.1	2.28714	4.88087	0.00659769	0.214663	col-104	N.A.
WBGene00000457	4R79.1	2.28686	4.87993	0.0450027	1	nas-6	nas-6 encodes an astacin-like metalloprotease.
WBGene00000458	T14B4.6	2.26699	4.81317	7.32208e-05	0.0193619	dpy-2	The dpy-2 gene encodes an unusual cuticular collagen that is required for maintaining the normal body length of the animal in later larval stages\; dpy-2 interacts with other cuticular collagens such as dpy-10 and sqt-1, and suppresses mutations in glp-1, mup-1, and emb-5.
WBGene00016520	Y53F4B.27	2.26152	4.79497	0.0375337	1	Y53F4B.27	N.A.
WBGene00003377	F56D2.3	2.25647	4.7782	0.00474637	0.177055	F56D2.3	N.A.
WBGene00016553	C25F9.1	2.24998	4.75676	0.00234387	0.115786	srw-85	N.A.
WBGene00016545	ZK180.5	2.24919	4.75415	0.0439624	0.551567	ZK180.5	N.A.
WBGene00016549	R07E3.3	2.24305	4.73398	0.0033259	0.142829	cut-5	N.A.
WBGene00016551	F46C8.2	2.2403	4.72495	0.0261786	1	col-174	N.A.
WBGene00016577	C44H9.7	2.2254	4.67642	0.0017985	0.101061	C44H9.7	N.A.
WBGene00016578	M142.2	2.20776	4.61959	0.00499856	0.182685	cut-6	N.A.
WBGene00000039	K08F8.2	2.19383	4.57518	0.000129527	0.0272559	atf-2	atf-2 encodes a cAMP-dependent transcription factor paralogous to CES-2, a bZip-like transcription factor that plays a key role in regulation of apoptosis\; atf-2 activity is required for excretory duct cell development and essential for embryonic development\; in regulating excretory duct cell development, ATF-2 controls expression of lin-48\; in vitro, ATF-2 binds the regulatory regions of LIN-…
WBGene00001123	Y46H3A.2	2.19086	4.56578	0.0117673	0.283429	hsp-16.41	hsp-16.41 encodes a 16-kD heat shock protein (HSP) that is a member of the hsp16\/hsp20\/alphaB-crystallin (HSP16) family of heat shock proteins\; an hsp-16.41 reporter fusion, expressed broadly but strongest in intestine and pharynx, is induced in response to heat shock or other environmental stresses\; expression is detectable in somatic tissues in post-gastrulation embryos, all larval stages, …
WBGene00003516	F42G2.3	2.18522	4.54797	0.00853206	0.240216	fbxc-20	N.A.
WBGene00016633	Y102A11A.5	2.18392	4.54385	0.00384586	0.153604	Y102A11A.5	N.A.
WBGene00043996	Y51H7C.10	2.17855	4.52699	0.0061687	0.20471	Y51H7C.10	N.A.
WBGene00000753	R12A1.3	2.17709	4.52241	0.0224693	0.395074	R12A1.3	N.A.
WBGene00008091	F46C8.6	2.16714	4.49131	0.0326444	0.479491	dpy-7	dpy-7 encodes a cuticular collagen\; DPY-7 functions as a structural constituent of the extracellular cuticle whose activity is required for normal cuticular morphology and hence, proper body form.
WBGene00008093	C40A11.10	2.16509	4.48494	0.00276262	0.126215	mir-8199	N.A.
WBGene00002282	T24A6.8	2.16193	4.47513	0.0267892	1	nhr-221	N.A.
WBGene00006366	ZC13.4	2.1556	4.45553	0.00304261	0.134976	mab-7	mab-7 encodes a protein with a hydrophobic type II transmembrane region at the N-terminus, an EGF-like motif, a ShKT motif and a long C-terminus\; mab-7 is involved in morphogenesis of the male tail, specifically affecting the structural cells, neuronal processes and the hypodermal sheath of the sensory rays, as such, it affects mating in males\; a mab-7 promoter-gfp construct is expressed in hyp…
WBGene00008102	F40E10.5	2.15438	4.45176	0.0378612	0.514173	F40E10.5	N.A.
WBGene00045379	Y53C12C.1	2.15427	4.45142	0.000447053	0.0496411	eyg-1	eyg-1 encodes a divergent PAIRED (PRD) class homeodomain protein\; within the PRD class of homeobox genes, it belongs to the Eyg (eyegone) family of PRD homeobox genes that has been lost in vertebrates\; eyg-1 lost the first half of the Paired domain and only retained the second half (RED subdomain)\; it has no obvious function in mass RNAi assays.
WBGene00004219	ZK1248.2	2.13853	4.40312	0.000820089	0.0642354	col-74	N.A.
WBGene00016671	T16A1.1	2.13559	4.39416	0.00689172	0.217662	math-42	N.A.
WBGene00000603	F49B2.3	2.13094	4.38003	0.0100164	0.25862	F49B2.3	N.A.
WBGene00016711	Y38H6A.5	2.11961	4.34576	0.0130775	0.297459	Y38H6A.5	N.A.
WBGene00004335	W04G3.2	2.11553	4.33348	0.00167496	0.098691	lpr-5	lpr-5 encodes one of seven C. elegans proteins related to the lipocalin family of structurally related, low molecular weight, secreted proteins that bind and transport lipophilic molecules and participate in intercellular signaling\; loss of lpr-5 function via RNAi results in defects in locomotion, body morphology, larval lethality, and yolk endocytosis\; lpr-5 appears to be expressed in the hypo…
WBGene00008138	F08D12.12	2.11376	4.32817	0.0467787	1	F08D12.12	N.A.
WBGene00003671	Y38C1BA.3	2.11292	4.32565	0.0441322	0.551591	col-109	col-109 encodes a cuticular collagen\; loss of col-109 via large-scale RNAi screens results in no obvious defects.
WBGene00006853	C15C8.2	2.09768	4.28022	0.0412203	0.534907	cky-1	cky-1 encodes a member of the basic helix-loop-helix\/Per-Arnt-Sim (bHLH-PAS) protein family\; CKY-1 physically interacts with AHA-1, and when co-expressed in vitro, an AHA-1\/CKY-1 complex exhibits sequence-specific DNA binding\; when co-expressed in cultured cells, the AHA-1\/CKY-1 complex can stimulate reporter gene transcription\; cky-1 is expressed in non-neuronal pharyngeal cells.
WBGene00008168	C44H4.1	2.08898	4.25448	0.00283385	0.128612	lron-1	N.A.
WBGene00001377	B0491.4	2.08631	4.24661	0.00362297	0.148127	lgc-20	N.A.
WBGene00000734	F15B9.8	2.06475	4.18362	0.00457842	0.172954	F15B9.8	N.A.
WBGene00001430	Y41D4B.6	2.06402	4.18151	0.00808834	0.233076	Y41D4B.6	N.A.
WBGene00016841	T11F9.9	2.04454	4.12541	0.0355165	0.501243	col-157	N.A.
WBGene00016871	T05H10.3	2.04171	4.11734	0.0020877	0.107872	T05H10.3	N.A.
WBGene00006680	SSSD1.1	2.04029	4.11328	6.56135e-05	0.0184727	igcm-2	igcm-2 encodes a protein containing immunoglobulin and fibronectin repeats\; igcm-2 promoter::gfp fusions are expressed in the PVT interneuron, in some head neurons, and in the pharynx and intestine.
WBGene00004815	F22F4.1	2.03798	4.10669	0.000364286	0.0430944	sups-1	N.A.
WBGene00004819	Y113G7A.6	2.03456	4.09699	0.00107515	0.076717	ttx-1	ttx-1 encodes a homeodomain protein that is a member of the OTD\/OTX subclass of homeodomain transcription factors\; ttx-1 is expressed at higher levels in the AFD thermosensory neurons as compared to the AWB olfactory neurons and is necessary and partly sufficient for specification of the AFD thermosensory neuron fate and thus for proper AFD-mediated thermosensory behavior and normal expression …
WBGene00004814	ZC84.7	2.03056	4.08564	0.0410321	1	ZC84.7	N.A.
WBGene00016886	C44C10.1	2.02818	4.0789	0.00386399	0.153604	col-180	N.A.
WBGene00044770	T04H1.6	2.01985	4.05541	0.0228891	1	lrx-1	lrx-1 encodes a protein that contains four class A low-density lipoprotein receptor domains.
WBGene00008314	C10A4.3	2.01487	4.04144	0.0156074	0.327776	C10A4.3	N.A.
WBGene00000440	F47C12.1	2.01443	4.04022	0.000289302	0.039147	not found
WBGene00000884	Y47G6A.17	1.99349	3.98198	0.00612025	0.204692	ccep-290	N.A.
WBGene00017028	B0304.3	1.99274	3.97992	0.0367769	1	cyp-23A1	cyp-23A1 encodes a cytochrome P450 homologous to the human gene CYP7B1, which when mutated leads to giant cell hepatitis (OMIM:231100)\; as a cytochrome P450, CYP-23A1 is predicted to function as a membrane-associated, heme-containing NADPH-dependent monooxygenases that catalyzes the oxidative metabolism of a variety of exogenous compounds and endogenous substrates.
WBGene00008376	T10E10.2	1.98366	3.95495	0.00727321	0.222418	col-167	N.A.
WBGene00000778	F26D10.11	1.98186	3.95001	0.00615026	0.20471	lhfp-4	F26D10.11 encodes an ortholog of murine TMHS (mutated in hurry-scurry\/hscy mice), a predicted tetraspan membrane protein required for stereociliary function and a possible ortholog of human DFNB53\; the cysteine mutated in hscy mice is conserved in F26D10.11.
WBGene00017046	C17E4.19	1.97923	3.94283	0.0224617	0.395074	C17E4.19	N.A.
WBGene00000731	ZC190.5	1.97811	3.93977	0.00157416	0.0962648	ZC190.5	N.A.
WBGene00008426	F23A7.1	1.97393	3.92836	0.0318018	1	F23A7.1	N.A.
WBGene00017073	R03H10.2	1.97374	3.92786	2.3109e-05	0.00973899	R03H10.2	N.A.
WBGene00017083	F27E5.4	1.96581	3.90631	0.0147431	0.316883	phg-1	N.A.
WBGene00001960	ZK377.1	1.96074	3.8926	0.0191352	0.358912	wrt-6	wrt-6 encodes a hedgehog-like protein, with (from N- to C-terminus) asignal sequence, a Wart domain, an short region of low-complexitysequence, and a Hint\/Hog domain\; WRT-6 is expressed in sheath and socketcells of anterior sensilla, seam cells, and hypodermis\; the Hint\/Hogdomain is predicted to cut WRT-6 into two halves and then covalentlylink cholesterol to the C-terminus of the Wart domain…
WBGene00004115	ZK993.1	1.95461	3.87612	0.00595199	0.20168	ceh-45	ceh-45 encodes a homeodomain-containing protein\; loss of ceh-45 activity via large-scale RNAi results in variable embryonic lethality.
WBGene00017143	T24H10.5	1.94612	3.85336	0.00167583	0.098691	T24H10.5	N.A.
WBGene00017133	K10G6.4	1.94564	3.85208	0.0130609	0.297459	cank-26	N.A.
WBGene00001065	H42K12.3	1.94319	3.84555	0.00726247	0.222418	H42K12.3	N.A.
WBGene00017154	C09F9.7	1.9409	3.83944	0.0448517	0.557998	C09F9.7	N.A.
WBGene00017184	Y2H9A.3	1.94007	3.83725	0.00945065	0.252573	col-162	N.A.
WBGene00001449	Y52B11A.12	1.93825	3.8324	0.0471247	1	Y52B11A.12	N.A.
WBGene00017208	Y46H3A.3	1.93419	3.82162	0.0378648	0.514173	hsp-16.2	hsp-16.2 encodes a 16-kD heat shock protein (HSP) that is a member of the hsp16\/hsp20\/alphaB-crystallin (HSP16) family of heat shock proteins\; hsp-16.2 expression, strongest in intestine and pharynx, is induced in response to heat shock or other environmental stresses\; HSP-16.2 has been shown to interact with intracellular human beta amyloid peptide, a primary component of the extracellular p…
WBGene00008563	F57A10.5	1.93239	3.81688	0.00549792	0.191932	nhr-60	nhr-60 encodes a nuclear hormone receptor required for seam cell development, and for embryonic and early larval viability\; NHR-60 has no obvious non-nematode orthologs, and is thus classified as 'supplementary'\; NHR-60 is expressed throughout development in most cells from one-cell embryos to adults, and is noticeably enriched in seam cells and germline\; NHR-60's germline enrichment suggests …
WBGene00006063	F58E6.13	1.9254	3.79841	0.0308912	0.468088	F58E6.13	N.A.
WBGene00017253	T10D4.6	1.91207	3.76348	9.75874e-16	4.38688e-12	T10D4.6	N.A.
WBGene00017255	ZC13.3	1.90644	3.74884	0.0357619	0.503428	mam-1	N.A.
WBGene00017249	Y51H7C.12	1.90302	3.73995	0.019363	0.360387	Y51H7C.12	N.A.
WBGene00008585	F18E9.1	1.89981	3.73165	0.0384601	1	F18E9.1	N.A.
WBGene00002124	Y39A1A.9	1.89701	3.7244	0.0177324	0.348737	Y39A1A.9	N.A.
WBGene00008592	F53C3.6	1.8962	3.72232	0.00840428	0.239114	F53C3.6	N.A.
WBGene00008605	W01F3.3	1.89567	3.72094	0.0477168	0.572008	mlt-11	mlt-11 encodes one of 13 C. elegans proteins related to the mammalian Tissue Factor Pathway Inhibitors (TFPIs), serine protease inhibitors that function in blood coagulation (OMIM:152310)\; in C. elegans, genetic analysis indicates that mlt-11 is required for proper molting and, likely, for proper spatial and\/or temporal regulation of proteolysis during the molting cycle\; a mlt-11::gfp promoter…
WBGene00008622	ZC328.1	1.89483	3.71879	0.00079398	0.0639586	cuti-1	N.A.
WBGene00017296	F23H12.4	1.88603	3.69616	0.0438708	0.55139	sqt-3	sqt-3 encodes a cuticle collagen\; during development, sqt-3 activity is essential for viability and normal body morphology\; genetic and expression studies indicate that SQT-3 is a cuticle component at all stages of development and that SQT-3 likely forms higher order cuticular structures with the DPY-17 cuticular collagen, both of which are candidate substrates for the DPY-31 procollagen C-prot…
WBGene00017307	R12E2.14	1.88554	3.69491	0.0454429	0.562241	R12E2.14	N.A.
WBGene00017309	ZC204.14	1.88204	3.68595	6.06007e-08	6.28662e-05	ZC204.14	N.A.
WBGene00003243	K08B12.1	1.87867	3.67735	0.0379469	0.514323	K08B12.1	N.A.
WBGene00008666	W06A11.3	1.87754	3.67449	0.0303758	0.463962	fbxb-118	N.A.
WBGene00002232	C16C8.2	1.87044	3.65645	0.0349155	0.496698	skpo-2	N.A.
WBGene00003623	C25D7.3	1.86865	3.6519	1.52255e-15	5.13327e-12	sdc-3	sdc-3 encodes a protein that contains two mutationally separable domains: a zinc finger motif required for dosage compensation and a myosin- like putative ATP- binding region required for her-1 regulation of sex determination\; SDC-3 activates dosage compensation by directing the dosage compensation protein complex to the hermaphrodite X chromosomes, and is functionally redundant with SDC-2 with …
WBGene00000792	ZK1290.12	1.86486	3.64232	0.00238361	0.116892	wrt-1	N.A.
WBGene00017381	F56E3.4	1.86204	3.63521	0.0457623	0.565156	fax-1	fax-1 encodes a conserved nuclear receptor that contains two C4-type zinc fingers and is orthologous to the vertebrate photoreceptor-specific nuclear receptor PNR (OMIM:604485, mutated in enhanced S-cone syndrome and retinitis pigmentosa)\; fax-1 is required for normal locomotion and neuron fate specification, including specification of the AVA, AVE, and AVK interneurons and proper axon pathfindi…
WBGene00044692	F13D11.2	1.85972	3.62937	0.000541618	0.0520699	hbl-1	hbl-1 encodes a C2H2-type zinc finger transcription factor related to Drosophila hunchback\; hbl-1 is a heterochronic gene that plays an essential role in regulating developmental timing during postembryonic development\; accordingly, mutations in hbl-1 affect locomotion, egg laying, body morphology, and hypodermal differentiation\; hbl-1 is expressed in hypodermal precursor cells, neuronal precu…
WBGene00017423	C48B4.3	1.85761	3.62407	0.0177028	0.348737	C48B4.3	N.A.
WBGene00001824	C02F12.1	1.8512	3.60801	0.00216379	0.110116	tsp-17	N.A.
WBGene00008760	ZC168.2	1.84723	3.59809	0.0406659	1	ZC168.2	N.A.
WBGene00008776	T02E9.2	1.84471	3.59181	0.0161495	0.331942	grl-7	grl-7 encodes a hedgehog-like protein, with an N-terminal signalsequence, a central low-complexity region, and a C-terminal Ground-like(Grl) domain\; GRL-7 is expressed in intestine, hypodermis, and seamcells\; the Grl domain is predicted to form a cysteine-crosslinkedprotein involved in intercellular signalling, and it has subtlesimilarity to the N-terminal Hedge domain of HEDGEHOG proteins.
WBGene00017441	T19A5.3	1.83843	3.57622	0.00785191	0.228507	T19A5.3	N.A.
WBGene00008779	C26F1.1	1.83829	3.57585	0.0336372	0.486268	C26F1.1	N.A.
WBGene00017481	ZC101.3	1.83555	3.56907	0.00194187	0.104865	hhat-1	hhat-1 encodes a putative protein-cysteine N-palmitoyltransferase ('hedgehog acyltransferase') orthologous to human HHAT (OMIM: 605743) and GUP1 (OMIM:608116), and paralogous to HHAT-2\; since C. elegans has no HEDGEHOG homolog, the substrate and function of HHAT-1 in vivo are unclear.
WBGene00001475	T10D4.5	1.83463	3.5668	0.0169027	0.343022	srh-71	N.A.
WBGene00008851	Y74E4A.1	1.83421	3.56577	0.00119644	0.0831708	lgc-27	N.A.
WBGene00001131	T02G5.15	1.83358	3.56421	0.0197478	0.361356	T02G5.15	N.A.
WBGene00017535	Y60A9A.3	1.82477	3.54252	0.042748	1	Y60A9A.3	N.A.
WBGene00044058	F59A7.4	1.82439	3.54158	0.0273273	0.437486	hil-6	N.A.
WBGene00017562	F58E6.10	1.82192	3.53552	0.00376495	0.152018	unc-42	unc-42 encodes a paired-like homeodomain protein of the Q50 class\; UNC-42 is required to specify the fate of ASH sensory neurons, AVA, AVD, and AVE interneurons, and a subset of motor neurons\; unc-42 mutants fail to express cell-surface receptors required for differentiated neuronal function (sra-6, srb-6, glr-1, glr-5, and glr-6)\; UNC-42 is also required for AVKR and HSNL growth cones to foll…
WBGene00017568	C44B9.6	1.81858	3.52733	0.0480878	1	fbxb-87	This gene encodes a protein containing an F-box, a motif predicted to mediate protein-protein interactions either with homologs of yeast Skp-1p or with other proteins.
WBGene00003903	F44E5.5	1.79891	3.47956	0.0473864	0.570583	F44E5.5	F44E5.5 encodes a member of the Hsp70 family of heat shock proteins\; as loss of F44E5.5 activity via large-scale RNAi screens results in no obvious defects, the precise role of F44E5.5 in C. elegans development and\/or behavior is not yet known.
WBGene00006666	C07G3.8	1.79824	3.47797	0.0480236	1	C07G3.8	N.A.
WBGene00003772	W02A2.3	1.78996	3.45805	0.00636043	0.209723	pqn-74	pqn-74 encodes a protein with two chitin-binding peritrophin-A domains,separated by a glutamine\/asparagine (Q\/N)-rich ('prion') domain\; likeCEJ-1 and CPG-2, PQN-74 might participate in eggshell synthesis andearly embryonic development, and PQN-74's peritrophin-A domains mightenable mechanical cross-linking of chitin.
WBGene00008971	R01B10.2	1.78811	3.45362	0.0062154	0.205443	R01B10.2	N.A.
WBGene00009015	ZK265.4	1.77831	3.43024	0.0327894	0.479491	ceh-8	ceh-8 encodes a paired-like homeodomain protein of the Q50 class orthologous to the Rx homeobox protein of humans (RAX\; OMIM:601881) and Drosophila (CG10052-PA)\; CEH-8 and RX belong to one of at least 18 distinct families of paired-like homeodomain proteins, including 12 families in the Q50 class.
WBGene00006543	W04H10.6	1.77169	3.41453	0.0389373	0.520809	W04H10.6	N.A.
WBGene00001854	C14F11.6	1.76947	3.40928	0.00706594	0.220582	rml-3	N.A.
WBGene00017716	F36H5.7	1.76591	3.40089	0.0111496	0.277382	str-179	N.A.
WBGene00002125	F31D4.5	1.76558	3.40012	0.0115498	0.281664	F31D4.5	N.A.
WBGene00017723	T14G12.4	1.76499	3.39871	0.000153027	0.0285576	fkh-2	fkh-2 encodes one of 15 C. elegans forkhead transcription factors and is homologous to Drosophila sloppy-paired (slp) and the vertebrate Brain Factor 1 (BF-1, OMIM:164874, expression is restricted to the central nervous system)\; fkh-2 is required, along with ceh-37, for proper development of the AWB chemosensory neurons\; specifically, fkh-2 is required for development of AWB-specific ciliary an…
WBGene00009067	M163.3	1.757	3.37994	0.000454406	0.0496411	his-24	his-24 encodes one of eight C. elegans H1 linker histones\; HIS-24, along with the histone deacetylase SIR-2.1 and the Enhancer of zeste E(Z) ortholog MES-2, plays a key role in heterochromatin regulation and thus, in regulation of fertility and embryonic development\; specifically, HIS-24 and SIR-2.1 are essential for maintenance of the histone H3K27me3 mark at subtelomeric regions in the C. ele…
WBGene00009087	ZK662.8	1.74944	3.36228	0.0451385	1	ZK662.8	N.A.
WBGene00009089	C04C3.5	1.74575	3.35369	2.11365e-06	0.00135737	dyf-3	dyf-3 encodes an ortholog of zebrafish cluap1 (also qilin, and like PKD2required to suppress kidney cysts) and human clusterin-associatedprotein 1 (CLUAP1)\; DYF-3 is predicted to have two coiled-coil domains\;DYF-3 is required for normal assembly of middle and distal ciliarysegments, with dyf-3 mutants showing truncated sensory cilia\; DYF-3 isrequired cell-autonomously for dye uptake\; dyf-3 is…
WBGene00017755	Y43F8B.3	1.74512	3.35223	0.00251631	0.119848	Y43F8B.3	N.A.
WBGene00005018	C18D4.6	1.74475	3.35136	6.61864e-12	9.91767e-09	C18D4.6	N.A.
WBGene00003847	M142.4	1.74258	3.34633	0.0103006	0.263094	vab-7	The vab-7 gene encodes an even-skipped-like homeodomain protein that is required for DB motoneuron identity and posterior DB axonal polarity.
WBGene00017782	C14C11.8	1.74103	3.34274	0.0184195	0.355129	pqn-13	The protein product of this gene is predicted to contain a glutamine\/asparagine (Q\/N)-rich ('prion') domain, by the algorithm of Michelitsch and Weissman (as of the WS77 release of WormBase, i.e., in wormpep77).
WBGene00000396	F54B11.10	1.74079	3.34218	0.0429857	0.547242	F54B11.10	N.A.
WBGene00017814	F46F3.1	1.73866	3.33726	5.21422e-06	0.00270458	ceh-27	ceh-27 encodes a homeodomain protein of the NK-2 class that contains Drosophila scarecrow and human NKX-2 (OMIM:606727)\; CEH-27 activity is essential for embryogenesis and appears to be required for maintaining hypodermal integrity during movement as embryos lacking CEH-27 burst at a breach in the ventral hypodermis upon commencement of muscle contractions\; CEH-27 expression is first detected i…
WBGene00219915	F28F9.1	1.73291	3.32399	0.00155097	0.0955912	zag-1	zag-1 encodes a homeodomain protein of the ZFH class which consists of a homeodomain flanked by two clusters of C2H2-type zinc fingers and is related to transcriptional repressors encoded by Drosophila zfh-1 and the vertebrate ZEB genes\; ZAG-1 is required for locomotion, for neuronal differentiation, and for proper axonal branching and fasciculation\; from late embryogenesis through adult stages…
WBGene00002601	D1054.9	1.72943	3.31596	0.0435462	0.550511	D1054.9	N.A.
WBGene00009155	F40E10.1	1.72722	3.3109	0.000692611	0.0598753	hch-1	hch-1 encodes a member of the zinc-dependent metalloprotease family that contains an epidermal growth factor-like domain, a CUB domain, and a TSP1 domain and affects hatching and QL neuroblast migration.
WBGene00009156	ZK909.4	1.72333	3.30198	0.000318196	0.0401046	ces-2	ces-2 encodes a basic region leucine-zipper (bZIP) transcription factor, most similar in sequence and binding specificity to the PAR (proline- and acid-rich) subfamily of bZIP proteins\; ces-2 is required to activate programmed cell death in the sister cells of the serotoninergic neurosecretory motor (NSM) neurons, and is transcriptionally inhibited by activated LET-60(G12V)\; in regulating progr…
WBGene00000478	T24B8.6	1.72091	3.29645	6.57487e-05	0.0184727	hlh-3	hlh-3 encodes a basic helix-loop-helix transcription factor homologous to Drosophila Achaete-scute\; in vitro, HLH-3 can heterodimerize, and bind an E-box-containing probe, with HLH-2, the C. elegans E\/daughterless ortholog with which it is coexpressed in the nuclei of embryonic neuronal precursors.
WBGene00004017	2RSSE.6	1.71799	3.28977	0.0246464	0.412244	2RSSE.6	N.A.
WBGene00009212	T23F2.1	1.71263	3.27758	0.0100567	0.258825	bus-8	bus-8 encodes a glycosyltransferase related to mannosyltransferases that play a role in protein N-linked glycosylation \; bus-8 is required for colonization by Microbacterium nematophilum and the tail-swelling response to M. nematophilum infection\; bus-8 is also essential for enclosure during embryonic morphogenesis, functioning in or with ephrin-mediated signaling to effect the proper neuroblas…
WBGene00006970	F59B10.3	1.71209	3.27635	0.0405155	1	F59B10.3	N.A.
WBGene00000685	F41A4.1	1.71073	3.27326	0.0153283	0.322996	cutl-28	N.A.
WBGene00004120	T22F7.5	1.70802	3.26712	0.0194544	0.360387	not found
WBGene00000674	C44H4.3	1.69964	3.24819	0.000565576	0.0528084	sym-1	sym-1 encodes a protein containing 15 contiguous leucine-rich repeats (LRRs) that functionally overlaps with sym-5 and interacts with mec-8 with respect to embryonic viability and attachment of body muscle to the extracellular cuticle\; expression begins at the time of embryonic elongation and SYM-1 is secreted from the apical hypodermal surface of the embryo\; microarray analyses indicate that s…
WBGene00000445	C45B2.7	1.6992	3.2472	0.00779997	0.228368	ptr-4	ptr-4 encodes a nematode-specific member of the sterol sensing domain(SSD) proteins, distantly paralogous to Drosophila PATCHED (PTC) andhuman PTCH (OMIM:601309, mutated in basal cell nevus syndrome)\; PTR-4 isstrongly required for normal molting from L4 to adult stages male taildevelopment (a role conserved in C. briggsae)\; PTR-4 is also requiredfor normal endocytosis of yolk by oocytes, adult …
WBGene00017930	ZK1290.8	1.69361	3.23466	0.00181822	0.101324	wrt-10	wrt-10 encodes a hedgehog-like protein, with an N-terminal signalsequence, a Wart domain, and a C-terminal region of low-complexitysequence\; WRT-10 is expressed in both male and hermaphrodite intestine\;the Wart domain is predicted to form a cysteine-crosslinked proteininvolved in intercellular signalling, and it has subtle similarity tothe N-terminal Hedge domain of HEDGEHOG proteins\; WRT-10 i…
WBGene00009292	B0393.5	1.69263	3.23246	0.000613146	0.0558709	B0393.5	N.A.
WBGene00000443	Y116F11A.1	1.68674	3.21929	0.00859842	0.240577	Y116F11A.1	N.A.
WBGene00006380	K01A2.11	1.68625	3.21819	0.0229397	0.400732	cbn-1	cbn-1 encodes a protein that contains a predicted signal peptide and calcium-binding EF-hand motifs.
WBGene00009299	ZK75.2	1.68369	3.21248	0.00871396	0.24255	ins-2	ins-2 encodes an insulin-like peptide.
WBGene00009304	C52E2.7	1.6695	3.18105	0.00349706	0.146464	fbxb-96	N.A.
WBGene00017983	ZK328.8	1.666	3.17334	0.005734	0.196765	tbx-7	tbx-7 encodes one of 21 C. elegans T-box transcription factors\; in large-scale RNAi screens for early embryonic defects, loss of tbx-7 activity results in no obvious abnormalities\; thus, the precise role of tbx-7 in C. elegans development and\/or behavior is not yet known.
WBGene00017991	Y69A2AR.29	1.66563	3.17252	0.00194396	0.104865	ngn-1	ngn-1 encodes a member of the neurogenein family that is required for axonal guidance and connectivity of a subset of neurons, and also affects locomotion.
WBGene00009343	M03A1.7	1.66351	3.16786	0.00056779	0.0528084	dao-2	dao-2 encodes a (putatively) secreted protein with a DB module\; dao-2 is down-regulated in daf-2 mutant adults by comparison with normal adults, and thus may be involved in dauer formation.
WBGene00000658	F20A1.7	1.66248	3.1656	0.013623	0.307173	twk-11	twk-11 encodes one of more than 40 TWK (two-P domain K+) potassium channels in C. elegans that contain two pore regions and four transmembrane domains\; orthologous to C. briggsae CBG19123 with some similarity to Drosophila CG6004.
WBGene00017998	F21D9.1	1.65883	3.1576	0.0465338	1	F21D9.1	This gene encodes a protein containing an F-box, a motif predicted to mediate protein-protein interactions either with homologs of yeast Skp-1p or with other proteins.
WBGene00009359	T08H4.3	1.65745	3.15459	0.0119759	0.285583	ast-1	ast-1 encodes one of ten C. elegans ETS-box transcription factors\; AST-1 is required cell autonomously for proper initiation and maintenance of dopamine (DA) neuron fate\; AST-1 acts to specify DA neuron fate by positively regulating expression of a number of DA neuron-specific genes such as dat-1 and cat-2, which encodes a dopamine transporter and tyrosine hydroxylase, respectively\; AST-1 is a…
WBGene00009361	Y17G9B.11	1.65189	3.14245	0.0339655	0.488857	Y17G9B.11	N.A.
WBGene00045457	T14B4.7	1.64435	3.12607	0.000441379	0.0496037	dpy-10	A cuticle collagen protein that afffects body morphology and movement and genetically interacts with the sqt-1 collagen gene.
WBGene00009371	M03B6.3	1.64112	3.11908	0.00139574	0.0913738	M03B6.3	N.A.
WBGene00009375	F56A12.1	1.64055	3.11785	0.00164457	0.0985716	unc-39	unc-39 encodes a homeodomain transcription factor that belongs to the Six4\/5 family of homeodomain proteins that includes human Six5\; UNC-39 is required for axonal pathfinding in anterior-derived neurons and for specification of most mesodermal cell types and may regulate a developmental decision between migration and differentiation\; UNC-39 is expressed in the embryo in anterior neurons, post…
WBGene00018040	DY3.3	1.63694	3.11006	0.000664784	0.0582161	hlh-16	N.A.
WBGene00018041	2RSSE.2	1.63654	3.1092	0.00248695	0.119356	not found
WBGene00009426	Y73E7A.8	1.63652	3.10915	0.0293749	0.457776	Y73E7A.8	N.A.
WBGene00009469	F09F9.4	1.63439	3.10457	0.00897603	0.247496	F09F9.4	N.A.
WBGene00206519	Y39A1B.2	1.63279	3.10113	0.0420711	0.539839	ptr-19	ptr-19 encodes an ortholog of Drosophila and human PTCHD3, which definesone of seven paralogous families of sterol sensing domain (SSD)proteins\; PTR-19 is required for normal development in mass RNAi assays\;PTR-19 is expressed in pharynx, hypodermis, nervous system (includinghead neurons), and other cells.
WBGene00018102	C44H4.2	1.62672	3.08811	0.00149689	0.094332	let-4	let-4 encodes an extracellular leucine-rich repeat only protein\; let-4 was originally identified in a screen for essential genes, and let-4 mutants exhibit early larval lethality\; let-4 is required for organization of the apical extracellular matrix, and is involved in excretory cell canal morphology and renal function as mutants exhibit excretory canal cysts and impaired renal function.
WBGene00018103	ZC84.6	1.624	3.08229	0.0363287	0.505602	ZC84.6	N.A.
WBGene00006223	C03C10.9	1.62283	3.07979	0.0145058	0.315545	not found
WBGene00009520	T03G11.3	1.61211	3.05698	0.0407317	0.531684	T03G11.3	N.A.
WBGene00004013	F22F1.1	1.61024	3.05303	0.000501506	0.0520699	hil-3	N.A.
WBGene00000745	F52E10.5	1.60836	3.04906	0.0128051	0.293954	ifa-3	ifa-3 encodes an essential intermediate filament protein that is coexpressed with the essential IF protein IFB-1\; IFA-3 is required for survival past early larval stages, correct positioning of excretory canals and body muscles, attachment of cuticle to hypodermis, and locomotion\; IFA-3 forms heteropolymeric intermediate filaments in vitro with an equimolar mixture of IFB-1\; IFA-3 is expressed…
WBGene00006640	F32E10.3	1.60741	3.04705	0.0298786	0.461033	clec-180	N.A.
WBGene00004123	Y17G9B.7	1.605	3.04196	0.0011464	0.0801057	fbxb-77	N.A.
WBGene00009560	W06A11.4	1.60201	3.03565	1.05799e-09	1.29709e-06	W06A11.4	N.A.
WBGene00044375	C54G4.4	1.59845	3.02817	0.0440748	0.551591	C54G4.4	N.A.
WBGene00018204	F52B10.2	1.59497	3.02089	0.00239782	0.117163	hst-3.2	N.A.
WBGene00018215	DY3.5	1.59474	3.0204	0.0172817	0.345019	pqn-26	The protein product of this gene is predicted to contain a glutamine\/asparagine (Q\/N)-rich ('prion') domain, by the algorithm of Michelitsch and Weissman (as of the WS77 release of WormBase, i.e., in wormpep77).
WBGene00001828	ZC455.10	1.58526	3.00062	0.00351533	0.146773	fkb-4	fkb-4 encodes a peptidylprolyl cis\/trans isomerase homologous to mammalian FK506 immunosuppressant-binding protein 9\; FKB-4 expression is positively regulated by signaling through the DAF-2 insulin receptor-like pathway and in part, through the activity of the DAF-16 fork-head transcription factor suggesting that FKB-4 could play a role in metabolism and longevity\; as loss of FKB-4 function vi…
WBGene00009573	F01E11.1	1.58517	3.00043	0.00142526	0.0928551	ugt-57	N.A.
WBGene00002253	F43G9.11	1.58174	2.99332	0.003075	0.135521	ces-1	ces-1 encodes a C2H2-type zinc finger transcription factor that is a member of the Snail family of proteins that includes Drosophila Scratch, Snail, and Slug, and human SNAIL and SLUG\; during development, CES-1 functions as a transcriptional repressor that blocks programmed cell death in specific neurons by inhibiting expression of the cell-death activator EGL-1\; in addition, CES-1 functions to…
WBGene00195034	Y71H2AM.15	1.57775	2.98504	0.000163498	0.0286845	Y71H2AM.15	N.A.
WBGene00018242	Y41C4A.11	1.57687	2.98322	3.30298e-05	0.0116192	Y41C4A.11	Y41C4A.11 encodes a divergent paralog of F38E11.5, the beta' (beta-prime) subunit of the coatomer (COPI) complex.
WBGene00018251	Y116A8C.19	1.57644	2.98233	0.025564	0.422495	Y116A8C.19	Y116A8C.19 encodes a CCCH tandem zinc finger (TZF) protein\; based upon its sequence similarity to C. elegans POS-1, the product of Y116A8C.19 is predicted to function as an RNA-binding protein.
WBGene00018256	T06D8.3	1.57589	2.98119	0.0329258	0.48056	plpr-1	N.A.
WBGene00023284	F15B9.7	1.57043	2.96994	0.00134315	0.0899754	fmi-1	fmi-1 encodes a highly conserved cadherin-like protein with unique domain composition of six EGF and two laminin G domains, a GPS cleavage site and seven-pass transmembrane domain\; fmi-1 plays a crucial role in pioneer axon navigation as well as pioneer-mediated follower navigation\; FMI-1 is required cell autonomously in pioneer and partially non-cell autonomously in the follower\; different do…
WBGene00006746	F52B11.3	1.56631	2.96147	0.00073286	0.0617709	noah-2	noah-2 encodes a PAN and ZP domain-containing protein that is related to the Drosophila extracellular matrix component NompA (no-mechanoreceptor-potential A)\; loss of noah-2 function via RNAi indicates that NOAH-2 activity is essential for molting\; in addition, NOAH-2 appears to be required for embryonic and larval development, reproduction, coordinated locomotion, and the overall health of the…
WBGene00018297	Y65A5A.1	1.56492	2.95861	0.000795087	0.0639586	Y65A5A.1	N.A.
WBGene00018304	F57B9.9	1.55643	2.94126	0.0185804	0.356437	abu-13	The protein product of this gene is predicted to contain a glutamine\/asparagine (Q\/N)-rich ('prion') domain, by the algorithm of Michelitsch and Weissman (as of the WS77 release of WormBase, i.e., in wormpep77).
WBGene00018299	Y110A2AL.4	1.55592	2.94021	0.00954107	0.252791	Y110A2AL.4	N.A.
WBGene00018352	C33D12.7	1.55534	2.93903	0.014385	0.315545	ceh-30	ceh-30 encodes a homeodomain protein most similar to Drosophila and mammalian BarH1 (OMIM:605211) which function in neuronal cell fate determination\; CEH-30 functions as a key regulator of sex-specific apoptosis\; ceh-30 transcription is under the regulatory control of TRA-1A and UNC-86.
WBGene00018355	K08H2.4	1.55286	2.93398	0.00177951	0.100834	K08H2.4	N.A.
WBGene00000882	Y73C8C.2	1.54499	2.91802	0.00422948	0.162968	clec-210	N.A.
NA	C45G7.4	1.54325	2.9145	0.00899251	0.247496	C45G7.4	N.A.
WBGene00219294	C46A5.3	1.54068	2.90932	0.0340845	0.48943	col-14	col-14 encodes a collagen protein that affects vulval morphology in a large-scale RNAi screen\; mRNA expressed in embryos and transcript levels peak during each larval stage.
WBGene00000468	Y73B6BL.12	1.53907	2.90606	0.000162403	0.0286845	Y73B6BL.12	N.A.
WBGene00004092	Y38F2AL.1	1.53714	2.90219	0.000657398	0.0581986	nsy-4	nsy-4 encodes a member of the PMP22\/EMP\/claudin\/calcium channel gamma subunit family\; nsy-4 is worm-specific, with obvious homologs only in C. elegans\; nsy-4 functions with nsy-5 to induce the AWC chemosensory neuron ON fate by regulating the activity of the UNC-2\/UNC-36 calcium channel.
WBGene00018418	C08F1.10	1.53556	2.899	6.0246e-05	0.0176626	C08F1.10	N.A.
WBGene00009692	C01G6.1	1.52867	2.88519	0.000285972	0.039147	aqp-2	aqp-2 encodes, by alternative splicing, two isoforms of an biochemically atypical aquaglyceroporin\; when expressed in Xenopus oocytes, AQP-2 increases water permeability 5- to 11-fold, and urea permeability 4.5-fold, but has no effect on glycerol permeability\; AQP-2::GFP fusion proteins are expressed predominantly in the excretory cell and more weakly in muscle, motor neurons, and hypodermis\; …
WBGene00009698	ZC513.8	1.52413	2.87613	0.00336056	0.143419	col-43	col-43 encodes a collagen that is individually dispensable for viability and gross morphology in mass RNAi screens.
WBGene00018442	T01D3.3	1.52341	2.8747	0.00878017	0.243614	T01D3.3	N.A.
WBGene00018437	T22A3.2	1.51983	2.86757	0.00105492	0.0760787	hsp-12.1	hsp-12.1 encodes a member of the small heat shock family of proteins.
WBGene00018458	K03D10.1	1.51738	2.86271	0.000834644	0.0643201	kal-1	kal-1 encodes a cell surface protein that contains a WAP-type protease inhibitor domain and Type III fibronectin domains and is the C. elegans ortholog of human KAL-1, mutated in the X-linked form of the neurological disorder Kallmann syndrome\; in C. elegans, both kal-1 loss-of-function mutations and kal-1 overexpression result in similar phenotypes that indicate KAL-1 activity is required for e…
WBGene00018452	C40A11.2	1.51442	2.85684	9.31207e-05	0.022695	C40A11.2	N.A.
WBGene00009743	C24H12.2	1.51028	2.84866	0.0321522	0.477479	C24H12.2	N.A.
WBGene00003172	F46E10.2	1.50965	2.84741	0.00014793	0.0280983	F46E10.2	N.A.
WBGene00000747	F39H12.4	1.50353	2.83536	0.00592048	0.201192	igcm-1	igcm-1 encodes a protein containing immunoglobulin and fibronectin repeats\; igcm-1 promoter::gfp fusions are expressed in the labial neurons, including the sheath and socket cells, as well as in the pharynx and lateral hypodermis.
WBGene00018485	F26D10.12	1.50016	2.82875	0.00605714	0.204119	clec-196	N.A.
WBGene00001069	C08F1.11	1.49777	2.82405	0.014196	0.3154	C08F1.11	N.A.
WBGene00018489	T26H2.10	1.49748	2.82349	0.0144995	0.315545	T26H2.10	N.A.
WBGene00000449	F31E9.6	1.49462	2.8179	4.18499e-06	0.00245386	F31E9.6	N.A.
NA	F29F11.5	1.49248	2.81371	0.0326978	0.479491	ceh-22	ceh-22 encodes an NK-2 family homeodomain factor homologous to Drosophila TINMAN and vertebrate Nkx2-5 proteins\; CEH-22 activates pharyngeal muscle gene expression in combination with PHA-1 and is required for normal pharyngeal development\; ceh-22 is the first gene known to be expressed in pharyngeal muscles, being exclusively active in that tissue.
WBGene00219699	C28A5.4	1.48691	2.80287	0.000370134	0.0432277	ceh-43	ceh-43 encodes a homeobox protein of the Distal-less (Dll) class that is required for development of the anterior hypodermis during embryonic morphogenesis for cell adhesion\; ceh-43 affects embryonic and larval viability\; it is predominantly expressed in the head hypdodermis, neuronal support cells and CAN neurons.
WBGene00018572	Y116A8B.1	1.48587	2.80086	0.0187566	0.356545	Y116A8B.1	N.A.
WBGene00018606	C50F2.8	1.48469	2.79858	0.0192441	0.360063	magu-3	N.A.
WBGene00018607	F09E10.6	1.48338	2.79603	0.0335379	0.486213	F09E10.6	N.A.
WBGene00018608	R05H5.8	1.4818	2.79298	0.0240556	0.410557	tts-2	N.A.
WBGene00009863	F47F6.1	1.48165	2.79268	0.0113287	0.279302	lin-42	lin-42 encodes three PAS domain-containing proteins orthologous to insect and vertebrate Period proteins that function in regulation of circadian rhythms\; during larval development, lin-42 functions in the heterochronic pathway to regulate developmental switches that occurs in multiple tissues, including the hypodermis, gonad, sex myoblasts, and vulva\; genetic analysis suggests that, in the hyp…
WBGene00018630	F55B12.11	1.4801	2.78967	0.0177506	0.348737	F55B12.11	N.A.
WBGene00009899	T08E11.6	1.47512	2.78006	0.00988206	0.257277	fbxb-10	This gene encodes a protein containing an F-box, a motif predicted to mediate protein-protein interactions either with homologs of yeast Skp-1p or with other proteins\; its encoded protein also contains a Pfam-B45 motif of presently unknown function.
WBGene00044303	F13E9.11	1.46783	2.76605	0.00333613	0.142829	F13E9.11	N.A.
WBGene00044304	C09F9.2	1.46742	2.76528	0.00222892	0.113004	C09F9.2	N.A.
WBGene00009926	C03A3.1	1.46621	2.76295	0.000791659	0.0639586	C03A3.1	N.A.
WBGene00001253	T10B9.3	1.46593	2.76242	0.0487555	0.579775	cyp-13A6	cyp-13A6 encodes one of ~80 C. elegans cytochrome P450s: membrane-associated, heme-containing NADPH-dependent monooxygenases that catalyze the oxidative metabolism of a variety of exogenous compounds and endogenous substrates\; loss of cyp-13A6 activity in large-scale RNAi screens results in decreased and\/or slow growth and cadmium hypersensitivity\; cyp-13A6 expression is upregulated in respons…
WBGene00001534	C09G5.4	1.46569	2.76196	0.0177755	0.348737	col-39	col-39 encodes a collagen that is individually dispensable for viability and gross morphology in mass RNAi screens\; the amino- and carboxyl-terminal cysteine-rich regions of COL-39 are most closely related to those of COL-8, COL-19, and COL-35.
WBGene00002051	T24B8.3	1.4626	2.75605	0.000292278	0.039147	T24B8.3	N.A.
WBGene00009939	B0272.1	1.461	2.753	0.0116786	0.282843	tbb-4	N.A.
WBGene00009945	Y38E10A.5	1.46094	2.75288	0.014514	0.315545	clec-4	clec-4 encodes a C-type lectin\; clec-4 expression is upregulated in response to stressors, including pathogens and ionizing radiation.
WBGene00001820	Y50E8A.5	1.45896	2.7491	0.0275805	0.4407	Y50E8A.5	N.A.
WBGene00018743	C42D8.5	1.4561	2.74366	0.0105525	0.268007	acn-1	acn-1 encodes an ACE-like protein required for larval development and adult morphogenesis, and probably for cell fusion in larval seam cells\; ACN-1 lacks not only the HExxH consensus metallopeptidase motif, but also other active site residues found in the sequence HEAI\/VxD of mammalian and insect ACEs\; acn-1 is expressed in hypodermal cells, vulval precursor cells, and ray papillae in the male…
WBGene00018747	F09B12.1	1.45106	2.73408	0.0400603	0.525539	mlt-9	N.A.
WBGene00018750	R07E3.6	1.44516	2.72293	0.00343046	0.145026	R07E3.6	N.A.
WBGene00018761	K02E10.4	1.44502	2.72267	0.000575478	0.0531568	K02E10.4	N.A.
WBGene00009983	F36H5.4	1.44483	2.72231	0.00120401	0.0832678	F36H5.4	N.A.
WBGene00018763	F55F8.1	1.43807	2.70957	0.0320408	0.477479	ptr-10	ptr-10 encodes an ortholog of Drosophila and human PTCHD3, which definesone of seven paralogous families of sterol sensing domain (SSD)proteins\; PTR-10 is weakly required for normal molting from L4 to adultstages\; however, PTR-10 in conjunction with PTR-1 and PTR-6 is stronglyrequired for both molting and viability, with triple ptr-1\/-6\/-10 RNAianimals showing pronounced molting defects and l…
WBGene00010012	T19C4.1	1.43589	2.70548	0.0261732	0.42993	T19C4.1	N.A.
WBGene00000164	C49A1.4	1.43541	2.70459	4.2824e-05	0.0137506	eya-1	eya-1 encodes a protein orthologous to the Eyes absent\/Eya Drosophila protein which is involved in eye development and has protein tyrosine phosphatase \; RNA interference and mutant studies indicate that eya-1 is involved in embryonic and larval tissue morphogenesis as well as larval viability\; eya-1 mutants show increased embryonic cell deaths due to activation of the cell death pathway\; eya…
WBGene00018787	R07C3.5	1.4352	2.7042	0.000827317	0.0642354	fbxc-34	N.A.
WBGene00010033	F32H2.6	1.43425	2.70242	0.016648	0.339147	F32H2.6	N.A.
WBGene00000262	C06E7.4	1.43048	2.69536	0.000296085	0.039147	C06E7.4	N.A.
WBGene00010039	F31E8.3	1.42887	2.69235	0.0405764	0.53076	tab-1	tab-1 encodes a homeodomain protein homologous to Drosophila bsh (brain-specific homeodomain protein) and the vertebrate BarH-like homeodomain protein 1\; TAB-1 is required, during early larval development, for backward movement in response to anterior touch with a wire, while during later larval stages, TAB-1 is required for response to gentle touch with a hair\; TAB-1 expression begins in the e…
WBGene00000615	W09G12.4	1.42509	2.68531	0.0451641	0.559305	dsl-1	dsl-1 encodes a secreted protein with a single DSL and EGF domain inseries, resembling Delta\/LAG-2\; DSL-1, with APX-1 and LAG-2, iscollectively required for LIN-12\/Notch-mediated lateral signalling duringpostembryonic vulval development\; DSL-1, when misexpressed by lag-2sequences, can rescue the larval-lethal and anchor cell phenotypes oflag-2(q420ts)\; dsl-1(RNAi) animals have abnormal vulva…
WBGene00010051	F58G6.9	1.41799	2.67213	1.2523e-06	0.000938254	F58G6.9	N.A.
WBGene00018823	T02E9.5	1.41287	2.66267	0.00152427	0.0951683	T02E9.5	N.A.
WBGene00018824	F57G9.3	1.41074	2.65874	0.030449	0.464519	F57G9.3	N.A.
WBGene00018861	F11C1.6	1.40896	2.65545	0.00060428	0.0554375	nhr-25	nhr-25 encodes a nuclear hormone receptor orthologous to Drosophila Ftz-F1\; NHR-25 is required for embryogenesis, molting, vulval and gonadal development, and hypodermal expression of acn-1\; nhr-25 is expressed in gonads and loaded into embryos as a maternal transcript\; nhr-25 is zygotically expressed in progeny of the E cell, and then in hypodermis and gut\; the role of NHR-25 in molting may …
WBGene00077570	F29C4.8	1.4021	2.64286	0.00601835	0.203417	col-99	N.A.
WBGene00044791	K12H4.1	1.40174	2.64221	0.00538372	0.190234	pros-1	pros-1 encodes a homeodomain protein that is the C. elegans homolog of Drosophila prospero and mammalian Prox1 (Prospero-related homeobox)\; PROS-1 is required for excretory canal growth, and loss of pros-1 function in large-scale RNAi screens has been reported to result in locomotion defects, slow growth, and larval lethality\; in regulating excretory canal growth, PROS-1 functions via regulatio…
WBGene00018878	K11G9.4	1.39867	2.63658	0.0149751	0.319548	egl-46	egl-46 encodes a transcription factor with similarity to the TFIIA-like zinc-finger protein family\; egl-46 activity is required for coordinated locomotion, morphology and process formation of the touch cells, male mating efficiency, HSN cell migration, differentiation, and axonal outgrowth, serotonin production and also terminal divisions of the Q neuroblasts\; egl-46 acts to inhibit touch cell …
WBGene00004224	F14B4.1	1.39863	2.63652	0.00303893	0.134976	F14B4.1	N.A.
WBGene00006775	Y51A2D.15	1.39836	2.63602	0.0013477	0.0899754	grdn-1	N.A.
WBGene00000272	T23D8.8	1.39623	2.63213	0.0102696	0.263094	cfi-1	cfi-1 encodes a DNA-binding protein containing an AT-rich interaction domain (ARID) that affects differentiation of the URA sensory neurons, AVD, and PVC interneurons\; acts downstream of UNC-86 and LIN-32 in controlling URA and IL2 cell fate, and is expressed in some neurons and muscle cells.
WBGene00018965	F58D2.1	1.38956	2.61999	0.0192538	0.360063	gadr-1	N.A.
WBGene00000695	F48E3.9	1.38895	2.61888	0.0219921	0.38922	F48E3.9	N.A.
WBGene00018976	Y38H6C.14	1.38716	2.61563	0.029396	0.457776	famh-161	N.A.
WBGene00001400	Y69A2AR.25	1.37763	2.5984	0.0265496	0.433473	Y69A2AR.25	N.A.
WBGene00010163	F13H8.8	1.37733	2.59787	0.0235243	0.405599	F13H8.8	N.A.
WBGene00003650	ZK938.2	1.37696	2.59721	0.000101316	0.0239711	arrd-4	N.A.
WBGene00004133	B0304.1	1.37613	2.59571	0.00483548	0.179645	hlh-1	hlh-1 encodes a basic helix-loop-helix (bHLH) transcription factor that is the C. elegans ortholog of the myogenic regulatory factor (MRF) subgroup of bHLH proteins\; in C. elegans, HLH-1 activity is required during embryogenesis for proper bodywall muscle development and function, but not for bodywall muscle cell fate specification, per se: hlh-1 null mutants generate the normal number of bodywa…
WBGene00004749	Y51H4A.4	1.37123	2.5869	0.00534694	0.18976	zip-7	N.A.
WBGene00010219	H25K10.1	1.36982	2.58438	0.0415456	0.537323	H25K10.1	N.A.
WBGene00002261	Y25C1A.6	1.36908	2.58306	0.0123815	0.28817	Y25C1A.6	N.A.
WBGene00001570	ZK265.7	1.36562	2.57688	0.0121277	0.287293	ZK265.7	N.A.
WBGene00010234	F13H10.5	1.3652	2.57611	0.0121521	0.287293	F13H10.5	N.A.
WBGene00010240	Y37E11AL.5	1.36087	2.5684	0.00675473	0.215107	not found
WBGene00019041	M28.1	1.36069	2.56807	0.0169771	0.343058	cutl-9	N.A.
WBGene00019035	F26A10.2	1.35758	2.56255	0.017385	0.345294	F26A10.2	F26A10.2 encodes a protein with four zinc-finger domains and a glutamine\/asparagine-rich domain, that is required for maintenance of the germline and for locomotion\; F26A10.2(RNAi) animals are uncoordinated and have sterile progeny.
WBGene00006778	F29G9.1	1.35708	2.56166	0.00855443	0.240344	F29G9.1	N.A.
WBGene00077697	C26C6.7	1.33782	2.5277	0.0252913	0.419531	glb-8	glb-8 encodes a globin with no obvious function in mass RNAi assays\; glb-8 expression is induced by anoxia in a HIF-1 dependent manner, although it is also paradoxically upregulated in a hif-1 mutant background\; glb-8 expression is downregulated in a daf-2(e1370) mutant background under normoxic conditions\; glb-8 expression is lower in L3 larvae than in young adults or dauers.
WBGene00000678	T05E11.9	1.33123	2.51618	1.63701e-06	0.00116193	T05E11.9	N.A.
WBGene00044107	H19M22.3	1.33036	2.51465	0.00678931	0.215437	zmp-2	N.A.
WBGene00010285	F54C9.4	1.32562	2.50641	0.0108622	0.272789	col-38	col-38 encodes a member of the collagen superfamily containing collagen triple helix repeats (20 copies) required for normal body morphology.
WBGene00010288	Y63D3A.2	1.32157	2.49939	0.00810974	0.233194	fbxb-100	This gene encodes a protein containing an F-box, a motif predicted to mediate protein-protein interactions either with homologs of yeast Skp-1p or with other proteins.
WBGene00001857	C34G6.6	1.32021	2.49703	0.00765692	0.227448	noah-1	noah-1 encodes a PAN and ZP domain-containing protein that is related to the Drosophila extracellular matrix component NompA (no-mechanoreceptor-potential A)\; loss of noah-1 function via RNAi indicates that NOAH-1 activity is essential for molting\; in addition, NOAH-1 appears to be required for embryonic and larval development, vulval development, coordinated locomotion, and normal body morphol…
WBGene00010319	C16C4.6	1.31723	2.49187	0.0295104	0.4585	fbxb-98	This gene encodes a protein containing an F-box, a motif predicted to mediate protein-protein interactions either with homologs of yeast Skp-1p or with other proteins\; its encoded protein also contains a Pfam-B45 motif of presently unknown function.
WBGene00010310	M03D4.4	1.3145	2.48717	0.0153141	0.322996	M03D4.4	N.A.
WBGene00000401	F45D11.13	1.31432	2.48685	0.046256	0.565328	fbxb-30	N.A.
WBGene00019102	C36F7.4	1.31331	2.4851	0.0313637	0.471015	rig-5	N.A.
WBGene00001687	Y7A9D.1	1.31313	2.48481	0.0040496	0.159221	Y7A9D.1	N.A.
WBGene00019105	T03D3.5	1.31226	2.4833	8.22681e-05	0.0212237	T03D3.5	N.A.
WBGene00019154	H24O09.2	1.31031	2.47995	0.0378606	0.514173	fbxb-72	N.A.
WBGene00019184	H19N07.3	1.30741	2.47496	2.80558e-08	3.15301e-05	scb-1	N.A.
WBGene00019212	F40G9.20	1.30613	2.47277	0.0484218	0.578267	F40G9.20	N.A.
WBGene00010407	Y45G5AM.5	1.30037	2.46291	0.00189016	0.103454	Y45G5AM.5	N.A.
WBGene00019243	ZK783.1	1.29954	2.46151	0.00195196	0.104877	fbn-1	fbn-1 encodes a protein homologous to the human extracellular matrix protein fibrillin-1 (FBN1)\; in C. elegans, fbn-1 activity is required for completion of molting, particularly the L3\/L4 or L4\/Adult molts.
WBGene00010411	C10G8.6	1.29462	2.45313	0.00795866	0.22983	ceh-34	ceh-34 encodes a homeodomain protein, homologous to human SIX2 (OMIM:604994)\; ceh-34 activity is required for regulation of the programmed cell death of a pharyngeal neuron, the sister of the M4 motor neuron\; CEH-34 binds the egl-1 5'-regulatory region in vitro and acts together with EYA-1, with which it physically interacts, to regulate expression of egl-1 to promote programmed cell death of t…
WBGene00019250	F11D5.3	1.2912	2.44732	0.00708631	0.220707	ddr-2	F11D5.3 encodes a putative tyrosine kinase homologous to human RS1 (OMIM:312700, mutated in juvenile X-linked retinoschisis).
WBGene00010423	F59B2.8	1.29109	2.44712	0.025989	0.427423	F59B2.8	This gene encodes a protein containing an F-box, a motif predicted to mediate protein-protein interactions either with homologs of yeast Skp-1p or with other proteins.
WBGene00044200	M01E10.2	1.29044	2.44602	0.0496421	0.583808	dpy-1	dpy-1 encodes a cuticulin\; DPY-1 activity is required for normal body length and alae formation\; dpy-1's site of action is localized to the hyp7 syncytium, based on mosaic analysis.
WBGene00019272	T04D3.2	1.28759	2.4412	0.00672654	0.215107	sdz-30	N.A.
WBGene00019285	ZK757.2	1.28598	2.43847	0.0236582	0.406958	ZK757.2	N.A.
WBGene00019282	F33H2.8	1.28494	2.43672	0.0230593	0.401781	F33H2.8	N.A.
WBGene00010461	ZC132.4	1.28419	2.43545	0.000315914	0.0401046	not found
WBGene00000431	Y53C12B.6	1.28327	2.4339	0.00568811	0.195688	cutl-2	N.A.
WBGene00010495	K06A1.3	1.27909	2.42685	0.0227149	0.397319	cutl-16	N.A.
WBGene00010504	C40A11.8	1.27634	2.42223	0.043625	0.550511	C40A11.8	N.A.
WBGene00019317	C43C3.3	1.27384	2.41804	0.00727319	0.222418	dyf-7	dyf-7 encodes a protein containing a single-pass transmembrane domain, a small cytoplasmic domain, and a large extra-cellular\/luminal domain related to that of zona pellucida (ZP) proteins, components of the matrix surrounding vertebrate oocytes to which sperm bind\; dyf-7 is required for anchoring dendritic tips during cell body migration: in dyf-7 embryos, neurons are born at the proper positi…
WBGene00001844	D1044.2	1.27271	2.41616	0.000116031	0.0257862	dex-1	dex-1 encodes a single-pass transmembrane protein with a domain similar to zonaadhesion, a sperm protein that binds the ZP matrix, dex-1 is also predicted to include two domains similar to nidogens, a family of proteins found in especially neural basement membrane\; dex-1 share a domain composition with alpha and beta\; tectorin, two vertebrate inner ear protein found in matrix that anchors the s…
WBGene00019318	F27E11.3	1.2647	2.40278	0.000718868	0.0609727	cfz-2	cfz-2 encodes one of four C. elegans Frizzled homologs, integral membrane proteins that contain an external cysteine-rich domain (CRD) and seven transmembrane domains and that function in a wide variety of species as receptors for Wnt glycoprotein signaling molecules\; CFZ-2 activity is required for cell migration and for vulval development.
WBGene00002181	F26B1.7	1.26429	2.40209	0.0306657	0.466769	let-381	let-381 encodes a forkhead transcription factor and was identified in a screen for essential genes\; let-381 is essential for development at different times as mutants exhibit embryonic and early larval lethality, with a few developing to sterile adults\; inactivation of let-381 using RNA interference results in adults with mesodermal cell lineage defects and a reduced number of coelomocytes\; re…
NA	Y46B2A.1	1.26149	2.39743	0.00259779	0.121224	fbxc-51	N.A.
WBGene00019407	C40A11.6	1.2571	2.39015	0.00465524	0.174683	C40A11.6	N.A.
WBGene00019412	T05A7.4	1.25695	2.38989	0.00258294	0.12095	hmg-11	N.A.
WBGene00019426	F33E2.5	1.25249	2.38251	0.00606939	0.204119	F33E2.5	N.A.
WBGene00019477	C25B8.4	1.25141	2.38073	0.00368844	0.149376	clec-266	N.A.
WBGene00004949	Y116F11B.10	1.25023	2.3788	0.000823464	0.0642354	Y116F11B.10	N.A.
WBGene00019520	W05E10.3	1.24825	2.37553	0.00047399	0.0507002	ceh-32	ceh-32 encodes a Six\/sine oculis-type homeodomain protein most closely related to the Six3\/6 subfamily that contains Drosophila OPTIX and human SIX3 (OMIM:603714, which when mutated leads to holoprosencephaly 2)\; CEH-32 appears to be essential for development and required for proper head morphogenesis\; during embryogenesis, CEH-32 is expressed in hypodermal and neuronal precursors, and at lat…
WBGene00019515	C08F8.15	1.2477	2.37463	0.012646	0.292027	C08F8.15	N.A.
WBGene00000641	R03C1.3	1.24609	2.37198	0.0495284	0.583644	cog-1	cog-1 encodes the C. elegans ortholog of the vertebrate Nkx6 homeodomain proteins\; cog-1 activity is required for multiple aspects of reproductive system development, including connection of uterus to the vulva and vulval cell specification, as well as for specification of left\/right asymmetry in the ASE taste receptor sensory neurons where cog-1 acts in ASER to suppress the ASEL cell fate\; co…
WBGene00019538	Y15E3A.1	1.24533	2.37073	0.00309156	0.135807	nhr-91	nhr-91 encodes a conserved nuclear receptor that is orthologous to members of the NR6 subfamily of nuclear receptors that includes Drosophila HR4 and human germ cell nuclear factor (GCNF, OMIM:600281, human and mouse GCNF are expressed primarily in the testis)\; by homology, NHR-91 is predicted to function as a transcription factor that may activate or repress transcription in response to a hormo…
WBGene00000220	C37E2.4	1.24505	2.37027	0.0273032	0.437486	ceh-36	ceh-36 encodes a paired-like homeodomain transcription factor that is one of three orthodenticle (OTX\/OTD) homeodomain proteins in C. elegans (the others being TTX-1 and CEH-37)\; CEH-36 is required broadly for specification of the AWC olfactory neuron and also for establishing the left-right asymmetry of the ASEL and ASER gustatory neurons\; in addition, CEH-36 is sufficient to specify the AFD …
WBGene00004827	M01D1.10	1.24269	2.36639	0.0139139	0.311437	fbxb-45	N.A.
WBGene00010691	F58A4.11	1.234	2.35218	0.0233464	0.404171	gei-13	gei-13 encodes a protein, with a BED finger domain (predicted to be DNA-binding) and a glutamine\/asparagine-rich domain\; GEI-13 physically interacts with GEX-3, and is required for normal body shape, cuticle synthesis, and locomotion.
WBGene00044698	C05A9.2	1.23166	2.34837	0.000633883	0.0569903	C05A9.2	N.A.
WBGene00019591	C47G2.2	1.23041	2.34633	0.0194421	0.360387	unc-130	A member of the forkhead domain family of transcription factors that affects the generation of the AWA and ASG chemosensory neurons and is partially required for male tail morphogenesis and embryogenesis\; it is expressed in the AWA and ASG precursors\; it is required for the graded spatial expression of the UNC-129 TGF-beta guidance factor.
WBGene00000857	F59C12.1	1.23014	2.3459	0.0051616	0.186121	cdh-9	cdh-9 encodes a member of the cadherin superfamily of transmembrane glycoproteins that mediate homophilic cell-cell adhesion\; as loss of CDH-9 activity via RNA-mediated interference (RNAi) does not result in any abnormalities, the precise role of CDH-9 in C. elegans development and\/or behavior is not yet known.
WBGene00001715	Y55D5A.1	1.22896	2.34399	0.0115221	0.281498	Y55D5A.1	N.A.
WBGene00010738	K02B12.1	1.22862	2.34342	0.00503443	0.183004	ceh-6	ceh-6 encodes a POU family homeodomain protein, homologous to human POU3F4 (OMIM:304400, mutated in conductive deafness 3)\; ceh-6 is required for embryonic viability, locomotion, and molting, and for regulation of ectodermal and excretory function\; ceh-6 activity is also required for transdifferentiation of the Y rectal cell to the PDA neuron during larval development\; CEH-6 is expressed dynam…
WBGene00010742	K10D6.2	1.22618	2.33947	0.00973802	0.255655	K10D6.2	K10D6.2 encodes three isoforms of a claudin homolog that may be required for normal cohesion of apical junctions in epithelia\; K10D6.2A-C are worm-specific, with obvious homologs only in C. elegans\; K10D6.2A-C are required for embryonic viability in mass RNAi assays\; claudins are integral membrane proteins with four transmembrane sequences that are found in mammalian tight junctions (TJs), ind…
WBGene00010744	F36H5.13	1.22123	2.33145	0.0123097	0.287711	F36H5.13	N.A.
WBGene00019641	F48E3.6	1.22099	2.33106	0.000293371	0.039147	F48E3.6	N.A.
WBGene00010757	F15B10.3	1.21866	2.3273	0.00105006	0.0760787	F15B10.3	N.A.
WBGene00003844	F39D8.2	1.21143	2.31568	0.0147496	0.316883	psa-3	psa-3 encodes a Meis-related protein\; along with nob-1 and ceh-20, psa-3 is required for the proper asymmetric cell division of the T hypodermal cell\; a PSA-3::GFP reporter fusino is expressed in the T hypodermal cell, head neurons, posterior gut cells, hypodermal cells (hyp7, hyp9, and hyp10), and the P blast cells\; psa-3 expression is regulated by the POP-1 TCF transcription factor, as well …
WBGene00019644	T26E3.2	1.21108	2.31511	0.0426362	0.545158	ndx-1	The ndx-1 gene encodes a NUDIX hydrolase.
WBGene00010776	C47C12.3	1.21096	2.31491	0.0128145	0.293954	ref-2	ref-2 encodes a zinc-finger transcription factor of the Opa\/Zic family and is similar to the human proteins ZIC1 and ZIC2 (zinc finger protein of cerebellum 1\/2)\; ref-2 in elegans is required for both the generation of the Pn.p ventral epideraml cells, and to maintain them in an unfused state, in both hermaphrodites and males, so that sex-specifc structures can be formed\; ref-2 is also requir…
WBGene00001210	M01D1.2	1.20942	2.31244	0.0462304	0.565328	math-34	N.A.
WBGene00019661	ZK287.1	1.20842	2.31085	0.032145	0.477479	ZK287.1	N.A.
WBGene00000448	F20B10.1	1.20226	2.30099	0.00284194	0.128612	nlr-1	N.A.
WBGene00019705	Y46H3C.5	1.19837	2.29481	0.0273469	0.437486	Y46H3C.5	N.A.
WBGene00019699	Y49F6C.4	1.19257	2.2856	0.00306654	0.135521	bath-10	N.A.
WBGene00019700	Y71D11A.1	1.19206	2.28479	0.0121651	0.287293	cdh-12	cdh-12 encodes a cadherin\; by sequence similarity, CDH-12 is predicted to function in cellular adhesion.
WBGene00019704	Y71F9AL.7	1.19169	2.2842	0.048092	0.574973	Y71F9AL.7	N.A.
WBGene00001063	F55A4.10	1.18852	2.27918	0.0374054	0.512652	cutl-21	N.A.
WBGene00006508	T28F2.4	1.18513	2.27384	0.00226975	0.11431	jmjc-1	N.A.
WBGene00010808	R07C3.7	1.1841	2.27222	0.00407577	0.159784	fbxc-29	N.A.
WBGene00000928	C25F6.7	1.18322	2.27082	0.0244068	0.411995	C25F6.7	N.A.
WBGene00010835	C13G5.1	1.18108	2.26747	0.0235489	0.405599	ceh-16	ceh-16 encodes a homeodomain protein orthologous to Drosophila and vertebrate Engrailed proteins involved in segment and appendage development\; ceh-16 is an essential gene required for proper specification and differentiation of the lateral seam cells during embryonic development\; in specifying seam cell fates, CEH-16 appears to act as a transcriptional regulator, repressing expression of the e…
WBGene00019751	W01B6.1	1.1805	2.26655	0.00198367	0.10561	cwn-2	cwn-2 encodes one of five C. elegans Wnt signaling molecules that is homologous to mammalian Wnt5\; cwn-2 is required for proper placement of the nerve ring and anterior cells along the anterior\/posterior axis\; cwn-2 also acts redundantly to specify cell fates during vulval development\; CWN-2 appears to be required at the time of nerve ring development (comma stage of embryogenesis) for nerve …
WBGene00019769	T09B4.5	1.17858	2.26353	0.000540245	0.0520699	T09B4.5	N.A.
WBGene00010868	R02D5.1	1.17561	2.25888	0.0172036	0.344433	R02D5.1	N.A.
WBGene00001949	ZK512.1	1.17374	2.25596	0.0144928	0.315545	ZK512.1	N.A.
WBGene00000652	Y73B6BL.9	1.17312	2.25499	0.00201648	0.106011	hil-2	N.A.
WBGene00006843	Y82E9BR.17	1.17221	2.25357	0.000137689	0.027307	Y82E9BR.17	N.A.
WBGene00000853	R11G1.7	1.17107	2.25178	0.0107435	0.270818	R11G1.7	N.A.
WBGene00006873	F53B2.6	1.16875	2.24817	0.0059188	0.201192	ham-1	ham-1 encodes a novel protein with a winged helix DNA-binding motif\; ham-1 is required for the asymmetric divisions of several neuroblasts in the developing embryo and may influence their spindle position\; ham-1 mutations also exhibit HSN motor neuron migration defects\; HAM-1 interacts with itself in a yeast two-hybrid screen and observations suggest that its multimerization is required for it…
WBGene00001898	T05A6.1	1.16828	2.24744	0.000928532	0.0695677	cki-1	cki-1 encodes a homolog of the mammalian cyclin-dependent kinase inhibitor p27\/KIP1 that is required for the arrest of cell division in larval blast lineages, dauer larvae and starved L1 larvae\; excess CKI-1 expression prematurely stops cell division while cki-1(RNAi) induces extra cell divisions, indicating that CKI-1 quantitatively regulates the amount of mitosis in postembryonic worms.
WBGene00010893	C53C11.5	1.16757	2.24633	0.0464867	0.566213	C53C11.5	N.A.
WBGene00010904	Y102A11A.8	1.16667	2.24493	0.00421914	0.162968	igcm-4	N.A.
WBGene00003915	R13H4.1	1.16583	2.24363	0.0296645	0.459307	nphp-4	nphp-4 encodes an ortholog of human NPHP4 (OMIM:607215, mutated injuvenile nephronophthisis and Senior-Loken syndrome-4) that is requiredfor normal chemotaxis, lifespan, and male mating behavior\; NPHP-4 isexpressed in diverse neurons (amphid and phasmid sensory, URX, labial,male lumbar and cloacal ganglia, and male-specific CEM, HOB and RnB)\;within neurons, NPHP-4 is a ciliary protein, localize…
WBGene00019804	F59D12.4	1.16415	2.24102	0.0439666	0.551567	gpn-1	gpn-1 encodes a glypican, a heparan sulfate proteoglycan anchored to the cell membrane by a GPI linkage, that is orthologous to Drosophila Dally-like (Dlp) and mammalian glypicans (OMIM:312870, mutated in Simpson-Golabi-Behmel overgrowth syndrome)\; by homology, GPN-1 is predicted to function as a cell surface protein that regulates intercellular signaling, perhaps within the context of cell divi…
WBGene00010976	F54A5.2	1.16391	2.24063	0.00939242	0.252573	cutl-20	N.A.
WBGene00019839	C45B11.6	1.16316	2.23948	0.0270179	0.437411	C45B11.6	N.A.
WBGene00019832	C25B8.1	1.16228	2.23811	0.0129339	0.295639	kqt-1	kqt-1 encodes one of three C. elegans KCNQ-like potassium channel subunits that, with respect to humans, is most similar to the KCNQ2-5 subfamily of channel proteins\; although loss of KQT-1 activity via large-scale RNAi screens results in no obvious abnormalities, KQT-1 likely functions to regulate cellular excitability as expression of KQT-1 in Xenopus oocytes can produce K+ channel currents th…
WBGene00010987	T26C12.3	1.15777	2.23113	0.00212128	0.109189	T26C12.3	N.A.
WBGene00000584	EEED8.2	1.15728	2.23036	0.00277026	0.126215	EEED8.2	N.A.
WBGene00019843	C10A4.8	1.15543	2.22751	0.0203263	0.368517	mnm-2	N.A.
WBGene00019855	T27B1.2	1.15242	2.22287	0.00295336	0.132322	pat-9	N.A.
WBGene00044281	H37A05.4	1.15047	2.21986	0.0204706	0.370558	H37A05.4	N.A.
WBGene00006651	Y41D4B.10	1.14942	2.21824	0.00418583	0.162213	dsl-3	dsl-3 encodes a putative secreted protein with single DSL and EGF domainsin series, somewhat like Delta\/LAG-2\; DSL-3 belongs to a nematode-specificfamily of Delta\/LAG-2-like proteins that includes DSL-1, -2, -3, -5, -6,and -7.
WBGene00011081	W04B5.2	1.1492	2.2179	0.0277571	0.441951	W04B5.2	N.A.
WBGene00019921	T07C4.2	1.14736	2.21508	0.0402741	0.52783	tbx-8	N.A.
WBGene00019923	K09F6.8	1.14272	2.20798	0.0268027	0.435496	fbxc-25	N.A.
WBGene00011104	Y53C10A.4	1.14068	2.20484	0.019702	0.361356	rga-2	N.A.
WBGene00011107	F44E2.4	1.13969	2.20334	0.0429014	0.547242	F44E2.4	N.A.
WBGene00019967	C32B5.1	1.13969	2.20333	0.00714136	0.220891	fbxc-40	N.A.
WBGene00006331	K11H12.5	1.13894	2.20218	0.0471966	0.570205	K11H12.5	N.A.
WBGene00020090	F25E5.1	1.1387	2.20182	0.000276612	0.038808	F25E5.1	N.A.
WBGene00011231	M110.1	1.13679	2.19891	0.00699908	0.219511	col-76	N.A.
WBGene00044061	C52B9.6	1.13596	2.19764	0.0323971	0.478993	twk-28	N.A.
WBGene00020004	C04G2.7	1.13478	2.19585	0.0463037	0.565328	egl-38	egl-38 encodes a paired domain-containing protein that is a member of the PAX2\/5\/8 family of transcription factors\; egl-38 is an essential gene, required for embryonic and larval development\; in addition, EGL-38 activity is also required for fate specification of four uterine cells and rectal epithelial cells in the hermaphrodite and male tail\; in regulating hindgut development EGL-38 acts i…
WBGene00044725	Y73B6BL.21	1.13473	2.19578	0.028158	0.44466	sfrp-1	N.A.
WBGene00020017	C41H7.7	1.13434	2.19518	0.0181139	0.352354	clec-3	N.A.
WBGene00020039	T04B8.3	1.13294	2.19306	0.00999673	0.25862	arrd-1	N.A.
WBGene00000437	C04F6.3	1.13266	2.19263	0.000704543	0.0601358	cht-1	cht-1 encodes a chitinase orthologous to human chitinase-1 (OMIM:600031, mutations are associated with chitotriosidase deficiency)\; CHT-1 is predicted to function as an extracellular O-glycosyl hydrolase that hydrolyzes the glycosidic bond between two or more carbohydrates\; in C. elegans, CHT-1 may play a role in embryogenesis, and may also be required for cuticle degradation during molting and…
WBGene00001086	K02E10.1	1.13226	2.19202	0.00173566	0.100086	K02E10.1	N.A.
WBGene00011261	W04A8.4	1.13226	2.19202	0.0128865	0.295054	W04A8.4	N.A.
WBGene00020104	Y55B1BR.3	1.12851	2.18633	0.00362463	0.148127	cec-8	N.A.
WBGene00005113	K10D3.4	1.12794	2.18546	0.000550419	0.0520699	K10D3.4	N.A.
WBGene00020073	K11D12.4	1.11916	2.17221	0.00320648	0.138598	cpt-4	N.A.
WBGene00020130	B0285.7	1.11902	2.17199	0.00147889	0.0940193	mnp-1	mnp-1 encodes a protein related to the M1 family of metalloproteinases, but whose sequence indicates that it is unlikely to be catalytically active (MNP-1 lacks three of the four essential zinc-binding amino acids)\; during embryonic development mnp-1 activity is required, likely cell autonomously, for migration of muscle cells from their lateral positions to their final positions close to the do…
WBGene00011327	K02D3.1	1.11869	2.1715	0.0383575	0.51735	K02D3.1	N.A.
WBGene00011328	Y75B8A.6	1.11186	2.16124	0.00390965	0.15462	Y75B8A.6	The protein product of this gene is predicted to contain a glutamine\/asparagine (Q\/N)-rich ('prion') domain, by the algorithm of Michelitsch and Weissman (as of the WS77 release of WormBase, i.e., in wormpep77).
WBGene00011345	C08C3.3	1.11047	2.15916	0.00945791	0.252573	mab-5	mab-5 encodes a homeodomain transcription factor related to the Antennapedia, Ultrabithorax, and abdominal-A family of homeodomain proteins\; during postembryonic development, mab-5 is required cell autonomously for specification of posterior cell fates, including hypodermal and neuronal fates, programmed cell deaths, cell proliferation and migration, and fate specification of the male-specific c…
WBGene00020160	Y56A3A.15	1.10757	2.15483	0.0100295	0.25862	fbxb-24	This gene encodes a protein containing an F-box, a motif predicted to mediate protein-protein interactions either with homologs of yeast Skp-1p or with other proteins.
WBGene00001716	C01G5.9	1.10321	2.14833	0.0145945	0.316378	C01G5.9	N.A.
WBGene00011383	Y71A12B.11	1.10117	2.14528	0.00361624	0.148127	Y71A12B.11	N.A.
WBGene00206521	D1069.2	1.101	2.14504	0.000477453	0.0507002	cpn-2	cpn-2 encodes a calponin homolog, more similar to the calponin paralogs transgelin (SM22 alpha) or neuronal protein NP25 than to calponin per se.
WBGene00020183	F39F10.4	1.10074	2.14465	0.00675595	0.215107	F39F10.4	N.A.
WBGene00020188	F45C12.6	1.10029	2.14398	0.0397273	0.52328	btb-8	N.A.
WBGene00020196	C47D12.4	1.10016	2.14379	0.0170465	0.343118	C47D12.4	This gene encodes a protein containing an F-box, a motif predicted to mediate protein-protein interactions either with homologs of yeast Skp-1p or with other proteins.
WBGene00020194	ZK930.3	1.09954	2.14286	0.0377199	0.513953	vab-23	vab-23 encodes a novel 253 amino acid coiled-coil containing a C-terminal C4H2 zinc finger domain\; VAB-23 is a conserved protein and has a strong homology to human hepatocellular carcinoma antigen (HCA127) (OMIM: 610334)\; vab-23 is required in ventral neuroblasts for ventral closure and elongation of the embryo, specifically to regulate proper cell contacts between contralateral pairs of ventra…
WBGene00020204	C26G2.1	1.09711	2.13925	0.00311808	0.136086	syg-2	syg-2 encodes a transmembrane protein that is a member of the immunoglobulin superfamily of proteins\; during larval development, SYG-2 activity is required in vulval epithelial cells for proper synaptic specificity of the HSNL neuron\; in regulating synapse formation, SYG-2 acts as a guidepost protein for the SYG-1 receptor that interacts with SYG-2 and acts within HSNL to regulate synaptic spec…
WBGene00020205	F49E12.6	1.09103	2.13026	0.000194238	0.0318177	efl-3	efl-3 encodes a protein with two E2F domains that may be involved in apoptosis.
WBGene00011427	C18A3.8	1.08234	2.11747	0.0240648	0.410557	hlh-14	hlh-14 encodes a basic helix-loop-helix (bHLH) transcription factor that is one of five C. elegans Achaete-Scute family homologs\; HLH-14 activity is required generally for normal egg-laying, movement, body morphology, and larval development\; more specifically, HLH-14 is required for proper neuronal development, particularly for regulation of the asymmetric cell division that gives rise to the P…
WBGene00007053	Y71F9B.8	1.08112	2.11568	0.00301236	0.134519	lron-11	N.A.
WBGene00011432	W03F9.4	1.07657	2.10901	0.00665351	0.214663	W03F9.4	N.A.
WBGene00003075	C24H12.1	1.0763	2.10863	0.00310275	0.135856	C24H12.1	This gene encodes a protein containing an F-box, a motif predicted to mediate protein-protein interactions either with homologs of yeast Skp-1p or with other proteins\; its encoded protein also contains a Pfam-B45 motif of presently unknown function.
WBGene00000516	T01G9.3	1.07471	2.1063	0.0360884	0.505602	dma-1	N.A.
WBGene00020221	F08C6.4	1.07182	2.10208	3.14937e-05	0.0115791	sto-1	N.A.
WBGene00001976	F41G3.12	1.0699	2.09929	0.0121561	0.287293	agr-1	agr-1 encodes a large (1396-residue) putative agrin, orthologous to human AGRIN (OMIM:103320), EGFLAM, and Q9NQ15\; AGR-1 is expressed in buccal epithelium and deposited in pharyngeal basal epithelium\; AGR-1 is also expressed in IL1 neurons, distal tip cells, and intestine\; an AGR-1 fragment can cluster vertebrate dystroglycan in cell culture\; agr-1(eg1770) mutations show no obvious phenotype,…
WBGene00011475	Y37E11AR.6	1.06922	2.0983	0.0180018	0.350827	vab-2	The vab-2 gene encodes an ephrin molecule related to human ephrin B2 (OMIM:600527)\; VAB-2, expressed primarily in neuronal cells, is a ligand for the VAB-1 ephrin receptor and plays a role in embryonic cell movements, epidermal morphogenesis during later embryogenesis, and oocyte maturation\; VAB-2 synergizes with PTP-3, a LAR-like receptor tyrosine phosphatase, to regulate morphogenesis.
WBGene00014505	C08F1.6	1.06632	2.09408	0.00937962	0.252573	C08F1.6	N.A.
WBGene00020261	C36F7.1	1.06541	2.09276	0.00669513	0.215107	irx-1	irx-1 encodes a homeodomain-containing protein that is most similar to members of the Iroquois subclass of TALE (three amino acid loop extension) superclass atypical homeodomain proteins\; IRX-1 functions downstream of the UNC-55 nuclear receptor in a transcriptional regulatory network that controls remodeling of the GABAergic DD neuron synapses during larval development.
WBGene00011508	ZK930.6	1.06534	2.09267	0.0355323	0.501243	ZK930.6	N.A.
WBGene00011524	D2023.7	1.05909	2.08362	0.0188898	0.357291	col-158	N.A.
WBGene00044011	Y51H7BR.1	1.05841	2.08263	0.0311067	0.470322	fbxb-42	N.A.
WBGene00077691	F38A6.1	1.05721	2.0809	0.00869783	0.24255	pha-4	pha-4 encodes a FoxA transcription factor\; during embryonic development, PHA-4 functions as an organ identity gene whose activity is necessary and sufficient for development of the pharynx\/foregut\; in addition, PHA-4 plays a key role in regulation of diet-restriction-induced longevity in adult animals\; PHA-4 expression begins early in embryogenesis and is seen in pharyngeal and intestinal cel…
WBGene00000720	Y46G5A.27	1.0566	2.08002	0.0102842	0.263094	pes-10	This gene encodes a protein containing an F-box, a motif predicted to mediate protein-protein interactions either with homologs of yeast Skp-1p or with other proteins.
WBGene00000719	F08D12.6	1.05494	2.07763	0.0337602	0.487462	fbxb-108	This gene encodes a protein containing an F-box, a motif predicted to mediate protein-protein interactions either with homologs of yeast Skp-1p or with other proteins\; its encoded protein also contains a Pfam-B45 motif of presently unknown function.
WBGene00011536	Y106G6D.1	1.05479	2.07742	0.00174589	0.100192	Y106G6D.1	N.A.
WBGene00006545	C52D10.7	1.05387	2.0761	0.00103566	0.0758448	skr-9	skr-9 encodes a homolog of Skp1 in S. cerevisiae, a component of the SCF (Skp1, Cullin, F-box) ubiquitin-ligase complex that regulates ubiquitin-mediated protein degradation\; SKR-9 is required for posterior body morphogenesis, embryonic and larval development, and postembryonic cell proliferation.
WBGene00011564	F40G9.6	1.0513	2.0724	0.0196999	0.361356	F40G9.6	N.A.
WBGene00001484	F39D8.1	1.0491	2.06924	0.0386414	0.519677	pqn-36	The protein product of this gene is predicted to contain a glutamine\/asparagine (Q\/N)-rich ('prion') domain, by the algorithm of Michelitsch and Weissman (as of the WS77 release of WormBase, i.e., in wormpep77).
WBGene00000106	R07B1.9	1.04522	2.06368	0.0419617	0.539462	R07B1.9	N.A.
WBGene00004229	C43E11.6	1.04384	2.06171	0.00501874	0.182926	nab-1	nab-1 encodes a PDZ and SAM domain-containing protein that is the sole C. elegans ortholog of the mammalian Neurabin\/Spinophilin proteins\; by homology, NAB-1 is predicted to interact with F-actin, ZYG-8\/Doublecortin and the SAD-1 serine\/threonine kinase to regulate interactions between the actin and microtubule networks during cell migration, growth cone guidance, and cell division\; loss of …
WBGene00020360	F23D12.3	1.04294	2.06043	0.0216366	0.386032	F23D12.3	N.A.
WBGene00020362	ZK822.1	1.03947	2.05547	0.0425826	0.545158	ZK822.1	N.A.
WBGene00006476	T06E4.4	1.03451	2.04842	0.0302683	0.46396	col-147	N.A.
WBGene00020368	F13C5.2	1.03203	2.0449	0.00157753	0.0962648	F13C5.2	F13C5.2 encodes a bromodomain-containing protein\; loss of F13C5.2 activity via RNAi in wild-type or various mutant backgrounds results in embryonic and larval lethality as well as sterility, reduced brood sizes, and uncoordinated locomotion\; an F13C5.2::gfp reporter fusion is expressed ubiquitously from early embryogenesis through adulthood with notably stronger expression seen in neurons.
WBGene00020379	Y38H6C.16	1.03166	2.04437	0.0071276	0.220891	Y38H6C.16	N.A.
WBGene00011680	F58E1.3	1.03051	2.04274	0.010691	0.270818	fbxb-26	This gene encodes a protein containing an F-box, a motif predicted to mediate protein-protein interactions either with homologs of yeast Skp-1p or with other proteins.
WBGene00011673	ZK1053.4	1.028	2.03919	0.00449235	0.170846	ZK1053.4	ZK1053.4 encodes a coiled-coil domain-containing protein that is a member of the SEPA-1 family of proteins\; ZK1053.4 is selectively removed by autophagy during embryogenesis\; ZK1053.4 physically interacts with SQST-1, the C. elegans ortholog of p62\/sequestome\/SQSTM1\; ZK1053.4 is weakly expressed in the cytoplasm of the embryo at all stages and is present both diffusely and in aggregates.
WBGene00005292	F32A7.3	1.02535	2.03546	0.043743	0.550511	eva-1	eva-1 encodes, by alternative splicing, two isoforms of a cell-surface protein that acts cell-autonomously with SAX-3 as a SLT-1 receptor subunit, and is required for guidance of the AVM pioneer axon to the ventral nerve cord\; EVA-1's long isoform is predicted to have a signal sequence, an ectodomain with two lectinlike galactose-binding sequences, a single transmembrane sequence, and a cytodoma…
WBGene00020408	R148.5	1.02139	2.02987	0.0141306	0.314465	R148.5	N.A.
WBGene00000740	M04F3.3	1.01812	2.02527	0.0242441	0.410749	kin-35	N.A.
WBGene00011706	F44F1.6	1.01592	2.0222	0.00447657	0.170846	F44F1.6	N.A.
WBGene00000730	F20C5.6	1.01503	2.02094	0.0146154	0.316378	F20C5.6	N.A.
WBGene00000301	Y105C5B.13	1.01133	2.01577	0.000154583	0.0285576	skr-10	skr-10 encodes a homolog of Skp1 in S. cerevisiae, a core component of the SCF (Skp1p, Cullin, F-box) ubiquitin-ligase complex that facilitates ubiquitin-mediated protein degradation\; SKR-10 is required for posterior body morphogenesis, embryonic and larval development, and cell proliferation\; SKR-10 is expressed in the tip and end regions of the intestine and can interact in vivo with CUL-1 an…
WBGene00001064	F29B9.9	1.01117	2.01554	0.0312234	0.470479	col-111	N.A.
WBGene00001072	F28D1.2	1.01052	2.01464	0.00183779	0.101994	atz-1	atz-1 encodes a putative myosin heavy chain protein\; deletion of atz-1 results in temperature sensitive reproductive defects, including a depleted or Abnormal Transition Zone with decreased REC-8 expression and disorded ooctye chromosomes\; in somatic cells, atz-1 is expressed in the pharynx and the hypodermis.
WBGene00003018	T05D4.2	1.00966	2.01344	0.00752559	0.227047	T05D4.2	N.A.
WBGene00001434	T07H8.6	1.00893	2.01242	0.0321642	0.477479	ptr-15	ptr-15 encodes a nematode-specific member of the sterol sensing domain(SSD) proteins, distantly paralogous to Drosophila PATCHED (PTC) andhuman PTCH (OMIM:601309, mutated in basal cell nevus syndrome)\; PTR-15has no known function in vivo.
WBGene00000482	Y20C6A.2	1.00754	2.01048	3.36013e-05	0.0116192	fbxb-7	N.A.
WBGene00020532	M01D1.9	1.00298	2.00413	0.0196924	0.361356	fbxb-40	This gene encodes a protein containing an F-box, a motif predicted to mediate protein-protein interactions either with homologs of yeast Skp-1p or with other proteins\; its encoded protein also contains a Pfam-B45 motif of presently unknown function.
WBGene00020537	Y106G6D.2	1.00223	2.0031	0.0048738	0.180121	Y106G6D.2	N.A.
WBGene00001711	C30G12.1	1.00007	2.0001	0.0184596	0.355129	C30G12.1	N.A.
WBGene00001695	C39E6.4	0.997602	1.99668	0.0409012	0.53294	mls-2	mls-2 encodes a homeodomain protein of the HMX family\; during postembryonic development, MLS-2 is required for cell proliferation, cleavage orientation, and fate specification in the mesodermal M lineage\; in regulating M lineage proliferation and fate specification, MLS-2 appears to act upstream of CYE-1\/cyclin E and HLH-1\/CeMyoD, respectively, the latter of which is not expressed in the M li…
WBGene00020554	Y51A2D.19	0.997481	1.99651	0.0022801	0.11431	slo-1	slo-1 encodes a voltage- and calcium-activated potassium (BK) channel\; SLO-1 activity is required for muscle inactivation: mutants have wild-type levels of motor activity, but have less smooth movement and tend to stop and reverse direction\; SLO-1 is expressed in neurons and in body wall and vulval muscle\; SLO-1 localization in proximity to the EGL-19 L-type calcium channel in muscle membrane …
WBGene00011831	F07E5.2	0.995892	1.99431	0.0178971	0.349797	fbxb-35	This gene encodes a protein containing an F-box, a motif predicted to mediate protein-protein interactions either with homologs of yeast Skp-1p or with other proteins\; its encoded protein also contains a Pfam-B45 motif of presently unknown function.
WBGene00011838	T25D10.4	0.993997	1.9917	0.00148496	0.0940193	T25D10.4	N.A.
WBGene00020648	C07A12.1	0.993182	1.99057	0.0285249	0.449925	ham-2	The ham-2 gene encodes a C2H2 zinc finger-containing protein required for proper migration of the hermaphrodite-specific neurons (HSNs) and proper attachment of the pharynx to the nose\; HAM-2 is expressed in the nuclei of the HSNs during migration, and acts downstream of EGL-5, a posterior group Hox protein, in HSN specification\; HAM-2 acts redundantly with UNC-86 to downregulate UNC-43 express…
WBGene00011906	T04B8.2	0.992343	1.98941	0.00944114	0.252573	T04B8.2	This gene encodes a protein containing an F-box, a motif predicted to mediate protein-protein interactions either with homologs of yeast Skp-1p or with other proteins\; its encoded protein also contains a Pfam-B45 motif of presently unknown function.
WBGene00002248	Y49F6B.7	0.9915	1.98825	0.0235492	0.405599	fbxb-104	N.A.
WBGene00011924	F31E3.1	0.989837	1.98596	0.0013425	0.0899754	ceh-20	ceh-20 encodes one of three C. elegans homeodomain proteins (CEH-20, CEH-40, and CEH-60) homologous to Extradenticle (Exd\/Pbx)\; together with ceh-40 and unc-62, ceh-20 activity is required for embryonic viability\; ceh-20 is also required as a cofactor for LIN-39- and MAB-5- dependent postembryonic mesoderm patterning\; in addition, ceh-20 is required for regulating post-embryonic migrations of…
WBGene00006882	F56E10.2	0.985956	1.98063	0.0496535	0.583808	daam-1	daam-1 encodes an ortholog of Drosophila DAAM and human DAAM1 (OMIM:606626)\; DAAM-1 enables Wnt-directed planar cell polarity\; DAAM-1 is required for the fully asymmetrical division of B.a versus B.p cells, though this requirement is quantitatively weak.
NA	ZK896.5	0.985853	1.98048	0.00959185	0.253639	ZK896.5	N.A.
WBGene00011934	F52C12.5	0.983569	1.97735	0.0377164	0.513953	elt-6	elt-6 encodes a GATA transcription factor\; ELT-6 is required for proper specification of vulval and seam cell fates, as well as for cell non-autonomous regulation of tail tip morphogenesis\; ELT-6 localizes to the nucleus.
WBGene00011938	T28D6.4	0.981806	1.97494	0.0092475	0.251943	T28D6.4	N.A.
WBGene00020726	F45D11.5	0.981396	1.97438	0.0381016	0.515037	F45D11.5	N.A.
WBGene00000476	W03G11.4	0.979372	1.97161	0.0113885	0.279889	W03G11.4	N.A.
WBGene00011948	B0250.12	0.978988	1.97108	0.0319686	0.47744	B0250.12	N.A.
WBGene00044623	K09F5.6	0.975614	1.96648	0.0113112	0.279302	K09F5.6	N.A.
WBGene00020748	F45H11.1	0.973306	1.96333	0.00173662	0.100086	sptf-1	N.A.
WBGene00011977	K03D7.1	0.972475	1.9622	0.031672	0.474587	not found
WBGene00001950	F02G3.1	0.971784	1.96126	0.011682	0.282843	ncam-1	N.A.
WBGene00012003	Y55D5A.6	0.971501	1.96088	0.039733	0.52328	cutl-25	N.A.
WBGene00020801	M01E5.6	0.969478	1.95813	0.018666	0.356545	sepa-1	sepa-1 encodes a self associating adaptor protein of 702 amino acids rich in helical structures at its N-terminus and a protein interaction KIX domain at the C-terminus\; SEPA-1 is required for degradation of germline P granule components PGL-1 and PGL-3 in somatic cells by the autophagic machinery\; sepa-1 forms protein aggregates and is preferentially removed by autophagy during embryogenesis\;…
WBGene00020803	C16B8.4	0.968858	1.95729	0.00981433	0.256315	C16B8.4	N.A.
WBGene00020833	T13F2.8	0.967979	1.9561	0.00177054	0.100787	cav-1	cav-1 encodes one of two C. elegans caveolin orthologs\; cav-1 is required for viability and Ras\/MAP-kinase-dependent progression through the meiotic cell cycle\; CAV-1 is expressed in the adult germ line and during embryonic development\; CAV-1::GFP localizes to cortical granules that function to secrete chondroitin and mucin-like proteoglycans to the extracellular space following fertilization.
WBGene00003578	F34D10.6	0.963994	1.9507	0.0370477	0.509631	arcp-1	N.A.
WBGene00044976	C24H10.1	0.962951	1.94929	0.0168854	0.343022	C24H10.1	C24H10.1 encodes a claudin homolog that may be required for normal cohesion of apical junctions in epithelia\; C24H10.1 is worm-specific, with obvious homologs only in C. elegans\; C24H10.1 has no obvious function in mass RNAi assays\; claudins are integral membrane proteins with four transmembrane sequences that are found in mammalian tight junctions (TJs), induce TJs when transgenically express…
WBGene00003933	W09C2.1	0.961791	1.94773	0.00189229	0.103454	elt-1	elt-1 encodes a GATA-like transcription factor\; elt-1 is essential for fate specification of both AB- and P1-derived epidermal (hypodermal) cells during embryogenesis\; elt-1 is also required for regulation of sperm-specific gene expression in the germ line and sperm function, and ELT-1 binds a sequence-specific DNA sequence, the sperm consensus site, in vitro\; ELT-1 has also been shown to acti…
WBGene00000691	Y57A10A.23	0.959723	1.94494	0.00237666	0.116892	txdc-12.1	N.A.
WBGene00012124	B0228.6	0.957626	1.94211	0.0120515	0.286644	B0228.6	N.A.
WBGene00006796	F53B3.5	0.956951	1.9412	0.0206339	0.372473	F53B3.5	F53B3.5 encodes a claudin homolog that may regulate ion channels\; F53B3.5 is distantly similar to mammalian voltage-dependent calcium channel gamma subunits that are known or suspected to prevent epilepsy in vivo (e.g., stargazin\; MGI:1316660)\; F53B3.5 has no obvious function in mass RNAi assays\; claudins are integral membrane proteins with four transmembrane sequences that are found in mamma…
WBGene00020902	Y46G5A.43	0.955233	1.93889	0.02429	0.41101	Y46G5A.43	N.A.
WBGene00000858	R02F2.2	0.952041	1.93461	0.0161074	0.33164	osg-1	R02F2.2 encodes a guanine nucleotide exchange factor of the Dbl family\; R02F2.2 plays a role in aging, and appears to be recruited, under conditions of oxidative stress, to effect loss of neuronal function via dysregulation of RHO-1 GTPase-mediated signaling and subsequent effects on the actin cytoskeleton and actin dynamics\; an R02F2.2::GFP reporter fusion is expressed in body wall muscles, he…
WBGene00020921	K01A2.8	0.950943	1.93314	0.00272888	0.125176	mps-2	mps-2 encodes single-pass transmembrane proteins that are related to the vertebrate KCNE proteins, also known as MinK-related peptides (MiRPs) that associate with, and regulate, pore-forming ion channels\; mps-1 is required for the normal function of several neurons and thus for normal body touch sensation, chemotaxis to select molecules, osmotic avoidance, and nose-touch\; when coexpressed in ti…
WBGene00012186	R04A9.7	0.950563	1.93263	0.0171213	0.34411	R04A9.7	N.A.
WBGene00004156	ZK520.3	0.949071	1.93063	0.00881127	0.243614	dyf-2	dyf-2 encodes an ortholog of human WDR19\; DYF-2 associates withintraflagellar transport (IFT) particle complex B in sensory cilia, andis required for normal assembly and motion of IFT structures, includingcomplex A particles\; consequently, DYF-2 is also required for normalcilial structure and chemosensation\; dyf-2 expression is regulated byDAF-19\; dyf-2 mutants are longer-lived than normal\; …
WBGene00012198	Y49F6C.3	0.943174	1.92275	0.0104146	0.265504	bath-9	N.A.
WBGene00001988	F07H5.13	0.942175	1.92142	0.0231794	0.401797	F07H5.13	N.A.
WBGene00020983	Y49A10A.2	0.939405	1.91774	0.00755757	0.227448	Y49A10A.2	N.A.
WBGene00021002	F32D1.3	0.937674	1.91544	0.00711617	0.220891	F32D1.3	N.A.
WBGene00012226	F11C7.4	0.928476	1.90326	0.00778804	0.228368	crb-1	crb-1 encodes a transmembrane protein with EGF-like and laminin repeats homologous to Drosophila CRUMBS\; crb-1 appears to function redundantly with let-413 to effect epithelial polarization\; CRB-1 localizes to cell junctions of non-cuticular epithelia, such as the intestine and the pharynx, near the apical plasma membrane.
WBGene00012239	C25F6.2	0.925975	1.89997	0.0015474	0.0955912	dlg-1	dlg-1 encodes a MAGUK protein, orthologous to Drosophila Discs large\; DLG-1 is physically located at apical adherens junctions in all epithelia and is required for organization of the embryonic gut epithelium into a coherent tube.
WBGene00021019	K08B4.3	0.924715	1.89831	0.00556765	0.192295	ugt-19	N.A.
WBGene00021025	F41B5.1	0.923306	1.89646	0.0290213	0.455212	F41B5.1	N.A.
WBGene00012254	Y39G10AR.10	0.918324	1.88992	0.00653101	0.2143	epg-2	N.A.
WBGene00012255	C50F2.6	0.917896	1.88936	0.00683983	0.21653	fkb-5	fkb-5 encodes a peptidyl-prolyl cis-trans isomerase (PPIase) that is one of eight FK506 binding proteins encoded by the C. elegans genome\; although fkb-5 single mutants show no obvious defects, animals doubly and triply mutant for fkb-5 and other FKB secretory pathway mutants display synthetic, cold-sensitive body morphology and molting defects as well as L1 larval lethality\; an fkb-5::lacZ rep…
WBGene00012256	F23F12.9	0.91762	1.889	0.00702704	0.219876	zip-8	zip-8 encodes a bZip family transcription factor\; the tm721 variation that affects zip-8 has been reported to result in lethality\; a zip-8::gfp reporter fusion is expressed in the adult intestine.
WBGene00206416	T23C6.4	0.917235	1.88849	0.0219707	0.38922	T23C6.4	N.A.
WBGene00206417	Y41D4B.26	0.911683	1.88124	0.0460345	0.565328	cpg-24	N.A.
WBGene00000453	Y64G10A.7	0.90793	1.87635	0.0216056	0.386032	Y64G10A.7	The Y64G10A.7 gene encodes a homolog of the human gene FIBRILLIN-1, which when mutated leads to Marfan syndrome (OMIM:154700).
WBGene00021054	R03E9.2	0.903435	1.87051	0.0271185	0.437486	R03E9.2	N.A.
WBGene00021055	F44C4.5	0.903171	1.87017	0.00556975	0.192295	ppt-1	ppt-1 encodes the C. elegans palmitoyl protein thioesterase-1 ortholog\; by homology PPT-1 is predicted to function in degradation of palmitoylated proteins and ppt-1 mutations result in loss of enzymatic activity from mixed-stage extracts\; in C. elegans, ppt-1 activity is essential for mitochondrial organization and biogenesis in neuronal and muscle cells, as well as for proper timing of the on…
WBGene00001397	R10E4.2	0.902919	1.86985	0.00255879	0.120657	sup-26	sup-26 encodes an RRM domain-containing protein\; SUP-26 functions in somatic sex determination via negative regulation of tra-2 translation\; SUP-26 binds the tra-2 28-nucleotide repeat element known as the TRA-2\/GLI element (TGE), which is located in tra-2 3'\;untranslated region (UTR)\; SUP-26 physically interacts with the poly(A)-binding protein PAB-1, suggesting that it may control tra-2 tr…
WBGene00012317	F58B3.9	0.901792	1.86839	0.000378829	0.0432277	ttr-50	N.A.
WBGene00001249	T02C5.3	0.898089	1.8636	0.00780644	0.228368	igcm-3	igcm-3 encodes protein containing an immunoglobulin-like domain\; loss of igcm-3 activity via RNAi results in a moderate increase in fat content, suggesting that igcm-3 may play a role in regulating lipid metabolism.
WBGene00001103	F54C8.6	0.895301	1.86	0.0363099	0.505602	F54C8.6	N.A.
WBGene00022415	Y73F8A.26	0.89496	1.85956	0.0053885	0.190234	Y73F8A.26	N.A.
WBGene00022418	T16A1.8	0.894897	1.85948	0.00750561	0.227047	fbxb-37	This gene encodes a protein containing an F-box, a motif predicted to mediate protein-protein interactions either with homologs of yeast Skp-1p or with other proteins\; its encoded protein also contains a Pfam-B45 motif of presently unknown function.
WBGene00004816	M01D1.3	0.891755	1.85543	0.0197327	0.361356	btb-11	N.A.
WBGene00013653	Y46G5A.7	0.888858	1.85171	0.0335655	0.486213	Y46G5A.7	This gene encodes a protein containing an F-box, a motif predicted to mediate protein-protein interactions either with homologs of yeast Skp-1p or with other proteins.
WBGene00013665	C11H1.7	0.888829	1.85167	0.0443245	0.55297	C11H1.7	N.A.
WBGene00013683	K05F6.1	0.886715	1.84896	0.0303086	0.46396	fbxb-49	N.A.
WBGene00013698	F35D2.3	0.885753	1.84773	0.0184353	0.355129	F35D2.3	N.A.
WBGene00013699	Y46D2A.2	0.883057	1.84428	0.044941	0.558594	Y46D2A.2	N.A.
WBGene00022438	K08H2.1	0.882041	1.84298	0.00165976	0.098691	skr-21	The skr-21 gene encodes a homolog of Skp1 in S. cerevisiae that has no known function in vivo, since skr-21(RNAi) animals are at least superficially normal.
WBGene00022441	ZC204.2	0.881867	1.84276	0.046681	0.566213	duxl-1	duxl-1 is a divergent homeobox gene\; it encodes three homeodomains, two of which are likely to have arisen as internal tandem duplication\; duxl-1 is expressed in the gonad, hypodermis, coelomocyte, intestine, germ line, and the excretory cell.
WBGene00006652	F52B10.3	0.880925	1.84156	0.0351606	0.499132	F52B10.3	N.A.
WBGene00013779	Y54G11A.9	0.880567	1.8411	0.0466994	0.566213	Y54G11A.9	N.A.
WBGene00013796	F58H1.5	0.878611	1.8386	0.0169146	0.343022	F58H1.5	N.A.
WBGene00013816	K05F1.5	0.874155	1.83293	0.0241575	0.410749	lect-2	N.A.
WBGene00013826	C33F10.7	0.874032	1.83278	0.0118072	0.283429	lact-5	lact-5 encodes beta-lactamase domain-containing proteins.
WBGene00003681	C32B5.14	0.873511	1.83212	0.00943223	0.252573	fbxc-18	N.A.
WBGene00006217	R13A5.5	0.87097	1.82889	0.0245135	0.412205	ceh-13	a homolog of Hox genes of labial\/Hox1 type\; affects viability, body shape and anterior patterning during embryogenesis, interacts genetically with hox genes\; and is expressed in A, D, E and MS lineages in the early embryo, and in the anterior dorsal hypodermal cells, anterior body wall muscle cells, and in the cells of the prospective ventral nerve cord at the comma stage\; and in the ventral …
WBGene00194835	F42G9.2	0.870469	1.82826	0.00188624	0.103454	cyn-6	cyn-6 encodes a cyclophilin most similar to human secreted cyclophilin type B isoforms that is functional when expressed in E. coli\; it is expressed in the intestine.
WBGene00021204	C06B8.7	0.869021	1.82642	0.0111685	0.277382	C06B8.7	N.A.
WBGene00012492	C02F12.7	0.862526	1.81822	0.015225	0.322516	tag-278	N.A.
WBGene00021293	C41H7.8	0.86135	1.81674	0.0248365	0.414536	sdz-5	N.A.
WBGene00000735	Y71A12B.12	0.858877	1.81363	0.0491853	0.582608	Y71A12B.12	N.A.
NA	B0511.1	0.85643	1.81055	0.0344379	0.493024	fkb-7	fkb-7 encodes a peptidylprolyl cis\/trans isomerase homologous to mammalian FK506-binding proteins\; by homology, FKB-7 could function in a number of different processes including protein folding, signal transduction, and regulation of muscle contraction\; however, as loss of fkb-7 function via RNA-mediated interference (RNAi) does not result in any obvious abnormalities, the precise role of FKB-…
WBGene00006869	Y57G11A.1	0.855855	1.80983	0.0179325	0.349983	tag-273	tag-273 encodes a LIM-type zinc finger domain-containing protein with similarity to human LIM domain and actin-binding protein 1 (HGNC:LIMA1)\; RNAi experiments indicate that TAG-273 is required for normal reproduction\; about 3\% to 10\% of tag-273 transcripts are RNA edited to change A to G resulting in a change to residue 688 from an N to a S.
WBGene00219449	C33B4.3	0.853785	1.80724	0.00764465	0.227448	shn-1	shn-1 encodes the sole elegans SHANK protein and orthlog of vertebrate SHANK3 (SH3 and multiple ankyrin repeat domains 3)\; shn-1 is required for the regulation of calcium-related behaviors like defecation, pharyngeal pumping and male fertility via the inositol triphosphate receptor, itr-1, and this activity is dependent on the shn-1 ANK-repeat domain\; shn-1 is expressed in neurons, pharynx and …
WBGene00006561	C39B5.2	0.852697	1.80587	0.00400137	0.157785	C39B5.2	N.A.
WBGene00000683	C05D9.7	0.852472	1.80559	0.0263406	0.431104	C05D9.7	N.A.
WBGene00012583	C34E7.4	0.850605	1.80326	0.0054109	0.190526	C34E7.4	N.A.
WBGene00000870	F12E12.8	0.8468	1.79851	0.0324277	0.478993	fbxb-91	N.A.
WBGene00021415	C14F11.2	0.844423	1.79555	0.0196281	0.361356	lrch-1	N.A.
WBGene00077669	C35E7.5	0.839852	1.78987	0.00659162	0.214663	C35E7.5	N.A.
WBGene00012626	Y71A12B.17	0.83689	1.7862	0.0116318	0.282642	gadr-5	N.A.
WBGene00012628	F53F10.1	0.835859	1.78492	0.0297716	0.460357	F53F10.1	N.A.
WBGene00012648	T05E7.5	0.833113	1.78153	0.0194425	0.360387	vet-1	N.A.
WBGene00004233	M88.1	0.828842	1.77626	0.000828782	0.0642354	ugt-62	N.A.
WBGene00021468	C17E4.2	0.82746	1.77456	0.0498433	0.585529	C17E4.2	N.A.
WBGene00012723	T22A3.8	0.826859	1.77382	0.0151575	0.321911	lam-3	lam-3 encodes one of two C. elegans a laminin A subunits and is orthologous to human laminin alpha2\; LAM-3 is a basement membrane component required for normal tissue development, including pharyngeal development\; lam-3 is expressed in the pharynx and hypodermis, and also weakly in the intestine.
WBGene00044066	F52F12.6	0.826227	1.77304	0.00382411	0.153488	ztf-11	N.A.
WBGene00012757	C52B11.2	0.824815	1.77131	0.0161713	0.331942	inso-1	N.A.
WBGene00001105	C33D9.6	0.822655	1.76866	0.0242018	0.410749	C33D9.6	N.A.
WBGene00021525	Y66D12A.12	0.820586	1.76612	0.00367819	0.149376	ztf-29	N.A.
WBGene00021513	B0507.1	0.819671	1.765	0.0415286	0.537323	B0507.1	N.A.
WBGene00012814	C36A4.14	0.819269	1.76451	0.0436961	0.550511	C36A4.14	N.A.
WBGene00012826	Y39G8B.2	0.815613	1.76005	0.0112791	0.279102	Y39G8B.2	N.A.
WBGene00044256	R11A5.3	0.815496	1.7599	0.0369665	0.509224	R11A5.3	N.A.
WBGene00012863	F23D12.5	0.813363	1.7573	0.00872286	0.24255	jmjd-3.2	F23D12.5 encodes a putative histone H3 di\/trimethyllysine-27 (H3K27me2\/me3) demethylase\; F23D12.5 contains a C-terminal JmjC domain, and is homologous to human JMJD3, UTX (OMIM:300128), and UTY (OMIM:400009)\; F23D12.5 is expected to antagonize transcriptional repression by polycomb repressor complexes, which mark stem cells (and presumably germline) by H3K27me3-mediated repression of somatic …
WBGene00021557	C26F1.5	0.811597	1.75515	0.0412225	0.534907	grl-10	grl-10 encodes a hedgehog-like protein, with an N-terminal signalsequence and a C-terminal Ground-like (Grl) domain\; the Grl domain ispredicted to form a cysteine-crosslinked protein involved inintercellular signalling, and it has subtle similarity to the N-terminalHedge domain of HEDGEHOG proteins.
WBGene00021576	F39C12.3	0.809398	1.75248	0.0107312	0.270818	tsp-14	N.A.
WBGene00021590	C31H5.4	0.809041	1.75205	0.0426878	0.545158	C31H5.4	N.A.
WBGene00003983	Y40B1B.3	0.806851	1.74939	0.0367301	0.508565	fbxb-66	N.A.
WBGene00044164	Y105E8A.26	0.806197	1.7486	0.018954	0.358003	zoo-1	zoo-1 encodes a protein ortholog of the zonula occludens (ZO) subfamily of membrane-associated guanylate kinases (MAGUKs)\; zoo-1 is involved in the recruitment of actin to cell junctions in a hmr-1\/cadherin dependant manner\; genetic interaction studies indicate that zoo-1 acts together with hmp-1\/alpha-catenin and hmp-2\/beta-catenin for the proper organization of actin at epidermal junctions…
WBGene00077636	T19B10.2	0.80368	1.74555	0.0125925	0.29129	T19B10.2	N.A.
WBGene00012899	K02B12.2	0.8036	1.74545	0.0450574	0.558674	K02B12.2	N.A.
WBGene00002018	F08D12.10	0.801545	1.74297	0.0187808	0.356545	sdz-9	This gene encodes a protein containing an F-box, a motif predicted to mediate protein-protein interactions either with homologs of yeast Skp-1p or with other proteins\; its encoded protein also contains a Pfam-B45 motif of presently unknown function.
WBGene00002016	F48E3.8	0.799336	1.7403	0.0118073	0.283429	F48E3.8	F48E3.8 encodes a polysaccharide deacetylase.
WBGene00021605	F10E9.6	0.797474	1.73806	0.00717814	0.22152	mig-10	mig-10 encodes proteins that contain, from N- to C-terminus, an RA-like (Ras association) domain, a PH (pleckstrin homology) domain, and a proline-rich motif, and that are homologous to the vertebrate RIAM, lamellopodin, and Grb7, Grb10, and Grb14 cytoplasmic adaptor proteins\; during development, mig-10 activity is required for cell migration and for outgrowth of axons and excretory cell canals\…
WBGene00021607	K10G9.3	0.797198	1.73772	0.00740805	0.225085	pad-2	pad-2 encodes an O-fucosyltransferase\; by homology, PAD-2 is predicted to catalyze the transfer of fucose to serine or threonine residues on recipient proteins\; RNAi experiments indicate that pad-2 activity is required for embryogenesis, particularly morphogenesis and late embryonic patterning, and for various aspects of post-embryonic development including neuronal, body wall muscle, and vulva…
WBGene00012922	C37E2.5	0.796406	1.73677	0.0256045	0.422647	ceh-37	ceh-37 encodes one of three C. elegans proteins with an OTX-like homeodomain\; however, CEH-37 lacks other domains found in OTX proteins, and the CEH-37 homeodomain is predicted to resemble the Myb domain of telomere-binding proteins\; CEH-37 binds the telomeric sequence 'TTAGGC' if it is repeated at least 1.5 times, and is mainly localized to the telomere in vivo\; ceh-37 mutants have a weak inc…
WBGene00001077	R52.1	0.796173	1.73649	0.047304	0.570205	sdz-28	N.A.
WBGene00012942	F21H11.3	0.794209	1.73413	0.0117848	0.283429	tbx-2	tbx-2 encodes one of 21 C. elegans T-box transcription factors\; during development, tbx-2 activity is required for normal adaptation, but not chemotaxis, to attractive odorants sensed by the AWC amphid neurons\; tbx-2 is required redundantly with unc-3 and unc-31 for negative regulation of dauer formation, and large-scale RNAi screens reveal an essential role for tbx-2 in early larval developmen…
WBGene00012943	Y71F9B.5	0.792276	1.7318	0.00475264	0.177055	lin-17	lin-17 encodes one of four C. elegans Frizzled homologs, integral membrane proteins that contain an external cysteine rich domain (CRD) and seven transmembrane domains and that function in a wide variety of species as receptors for Wnt glycoprotein signaling molecules\; LIN-17 activity is required for specifying the polarity of a number of asymmetric cell divisions that, in C. elegans, are essent…
WBGene00004813	T10B10.3	0.791884	1.73133	0.000380932	0.0432277	T10B10.3	N.A.
WBGene00021627	D2045.9	0.789265	1.72819	0.00139269	0.0913738	D2045.9	N.A.
WBGene00004820	Y49F6C.11	0.788147	1.72685	0.0324954	0.479468	linc-11	N.A.
WBGene00021643	C52D10.8	0.781869	1.71936	0.0160747	0.331482	skr-13	The skr-13 gene encodes a homolog of Skp1 in S. cerevisiae that has no known function in vivo, since skr-13(RNAi) animals are at least superficially normal.
WBGene00001045	C04G6.6	0.781652	1.7191	0.041819	0.53838	C04G6.6	N.A.
WBGene00001768	ZK1067.6	0.781294	1.71867	0.0190144	0.35814	sym-2	sym-2 encodes a predicted RNA binding protein that contains three RNA recognition motifs (RRMs) similar to those of Drosophila Fusilli and mammalian hnRNP F and H\; genetic analyses indicate that, during embryonic development, sym-2 functions redundantly with mec-8, which also encodes an RRM-containing protein, to affect the structure of body wall muscles or their attachment to the body cuticle, …
WBGene00044949	DC2.7	0.774224	1.71027	0.012772	0.293954	kin-33	N.A.
WBGene00021719	B0250.4	0.769172	1.70429	0.0361781	0.505602	B0250.4	N.A.
WBGene00219758	ZK512.3	0.767669	1.70252	0.0173283	0.34503	ced-11	The ced-11 gene encodes a predicted transmembrane ion channel related to the long transient receptor potential channel (LTRPC) subfamily of TRP channels found in Drosophila and mammals\; CED-11 functions as a downstream effector in the programmed cell death pathway and may play a role in affecting the morphological changes seen in the nucleus, cytoplasm, and plasma membrane of apoptotic cells.
WBGene00021725	K08A8.2	0.764056	1.69826	0.0354624	0.501243	sox-2	sox-2 encodes, by alternative splicing, three isoforms of a putative HMG-box transcription factor orthologous to human SOX1 (OMIM:602148), SOX2 (OMIM:184429, mutated in syndromic anophthalmia), and SOX3 (OMIM:313430, mutated in hypopituitarism), and paralogous to SOX-3\; SOX-2 is required for normal embryonic and larval viability, fertility, egg-laying, locomotion, and normally rapid growth\; SOX…
WBGene00021726	Y75B8A.1	0.759923	1.6934	0.00189479	0.103454	php-3	N.A.
WBGene00013048	T03F1.6	0.758042	1.69119	0.0290809	0.455499	T03F1.6	N.A.
WBGene00013082	Y48E1B.10	0.758004	1.69115	0.00592267	0.201192	gst-20	N.A.
WBGene00004830	C52D10.9	0.754292	1.6868	0.0271305	0.437486	skr-8	skr-8 encodes a homolog of Skp1 in S. cerevisiae, a component of the SCF (Skp1, Cullin, F-box) ubiquitin-ligase complex that regulates ubiquitin-mediated protein degradation\; SKR-8 is required for is required for posterior body morphogenesis, embryonic and larval development, and cell proliferation\; SKR-8 can interact with CUL-1, a C. elegans cullin homolog.
WBGene00013100	Y47D3A.1	0.749419	1.68112	0.0373304	0.512145	Y47D3A.1	N.A.
WBGene00021773	W02B8.2	0.748979	1.6806	0.00155231	0.0955912	W02B8.2	N.A.
WBGene00021788	K10B4.6	0.745732	1.67683	0.00663431	0.214663	cwn-1	cwn-1 encodes one of five C. elegans Wnt signaling ligands\; during embryogenesis cwn-1 likely functions as a downstream target of the PAL-1 homeodomain protein in the regulatory network that specifies cell fates in the C lineage that gives rise to ectodermal and muscle tissue\; consistent with this role, loss of cwn-1 activity via RNAi results in rare larval tail defects that may result, in part…
WBGene00021790	C36F7.2	0.74296	1.67361	0.00143503	0.0930426	swah-1	N.A.
WBGene00077539	C14B9.2	0.741376	1.67177	0.0122833	0.287711	C14B9.2	C14B9.2 encodes a protein disulfide isomerase\; by homology, the product of C14B9.2 is predicted to function in oxidative protein folding in the endoplasmic reticulum (ER)\; C14B9.2 transcript levels are increased in response to ER stress.
WBGene00013135	C29E6.1	0.739295	1.66936	0.040957	0.533153	let-653	let-653 encodes a mucin-like protein similar to the highly glycosylated mucins secreted by the apical surface of epithelia and believed to provide a protective barrier to exposed cellular surfaces\; LET-653 is required for viability, locomotion, and for maintaining the tubular epithelial structure of the excretory cell canals.
WBGene00013145	Y47D3B.10	0.738055	1.66793	0.0195055	0.360838	dpy-18	dpy-18 encodes a catalytic alpha subunit of collagen prolyl 4-hydroxylase (P4H) orthologous to human P4H alpha (I) isoform (OMIM: 176710), an alpha subunit of prolyl-4-hydroxylase which is a procollagen modifying enzyme required for exoskeleton formation, morphogenesis and maintenance of body shape\; dpy-18 has a critical role in hydroxylation of cuticle collagens during collagen synthesis\; dpy-…
WBGene00013147	C05E11.3	0.734815	1.66418	0.0038636	0.153604	C05E11.3	N.A.
WBGene00013173	Y71G12B.20	0.734417	1.66372	0.00387257	0.153604	mab-20	mab-20 encodes the C. elegans Semaphorin-2A ortholog\; during development, mab-20 activity is required for proper epidermal morphogenesis and axon guidance\; specifically, MAB-20, which functions to prevent ectopic, adhesive cell contacts, is required for ventral enclosure during embryogenesis, normal body morphology, and proper formation of sensory rays in the male tail\; co-immunoprecipitation …
WBGene00013218	EEED8.15	0.728782	1.65724	0.0203304	0.368517	EEED8.15	N.A.
WBGene00023484	ZK6.10	0.728704	1.65715	0.0144163	0.315545	dod-19	N.A.
WBGene00021913	F07D3.2	0.718314	1.64526	0.00655301	0.2145	flp-6	N.A.
WBGene00021915	F09C8.2	0.717345	1.64415	0.0156908	0.328072	F09C8.2	N.A.
WBGene00021919	ZC84.3	0.709932	1.63573	0.00547881	0.191915	cls-3	N.A.
WBGene00013234	C04A11.2	0.709781	1.63556	0.0318931	0.47684	C04A11.2	N.A.
WBGene00013263	Y47H9C.5	0.709374	1.63509	0.0334951	0.486213	dnj-27	This gene encodes a protein containing a DnaJ ('J') domain.
WBGene00013266	B0261.8	0.705889	1.63115	0.0359459	0.504965	B0261.8	N.A.
WBGene00013288	F58A3.1	0.700754	1.62535	0.0230271	0.401738	ldb-1	ldb-1 encodes an Ldb\/NLI\/Clim member of the nuclear LIM binding protein family that affects coordinated locomotion, vulval development, mechanosensation, and growth of larvae and is required for transcriptional activation of mec-2\; can interact with MEC-3 to activate transcription using yeast two-hybrid assays and is expressed in all neurons, vulval cells, gonadal sheath cells, and in some bod…
WBGene00021963	Y47D3B.9	0.700025	1.62453	0.0130797	0.297459	bed-2	N.A.
WBGene00013289	T22C8.3	0.699775	1.62425	0.0430132	0.547242	T22C8.3	N.A.
NA	W06D12.3	0.699341	1.62376	0.00953085	0.252791	fat-5	fat-5 encodes a delta-9 fatty acid desaturase that is predicted to be mitochondrial\; when expressed heterologously in S. cerevisiae, FAT-5 rescues the fatty acid auxotrophy of the yeast delta-9 desaturase mutant ole1.
WBGene00013328	F46C8.3	0.698562	1.62289	0.0467715	0.566213	F46C8.3	N.A.
WBGene00021988	C17G1.4	0.694801	1.61866	0.00341705	0.144913	nra-3	N.A.
WBGene00194675	Y57A10A.26	0.694294	1.61809	0.00941225	0.252573	Y57A10A.26	N.A.
WBGene00013403	R08F11.3	0.68965	1.61289	0.032817	0.479491	cyp-33C8	N.A.
WBGene00013404	F47E1.18	0.68835	1.61144	0.00818971	0.234494	linc-22	N.A.
WBGene00013416	F41C6.1	0.687268	1.61023	0.0201929	0.367505	unc-6	unc-6 encodes a netrin orthologous to the human and mouse netrin-1 precursor proteins\; UNC-6 functions as a guidance molecule that regulates circumferential axon migrations as well as migration of mesodermal cells, such as the gonadal distal tip cell, along the dorsoventral axis\; in addition, UNC-6 mediates anchor cell (AC) invasion by regulating localization of the UNC-40 netrin receptor to th…
WBGene00013418	K07C11.4	0.686259	1.60911	0.0313221	0.470914	cest-17	N.A.
WBGene00013438	F10G8.8	0.682865	1.60532	0.0205026	0.370641	F10G8.8	N.A.
WBGene00001705	C05D9.3	0.680165	1.60232	0.00785501	0.228507	C05D9.3	N.A.
WBGene00022096	T07D1.4	0.678433	1.6004	0.0158197	0.329234	fox-1	fox-1 encodes an RNA-binding protein of the RNA recognition motif (RRM) superfamily of ribonucleic acid binding proteins\; during C. elegans development, FOX-1 functions redundantly with other numerator elements to effect proper dosage compensation in the early embryo\; in influencing dosage compensation, FOX-1 likely acts via post-transcriptional regulation of xol-1 mRNA levels\; in addition to …
WBGene00003595	F54E2.1	0.673447	1.59488	0.0173461	0.34503	F54E2.1	N.A.
WBGene00012403	Y47D7A.8	0.672546	1.59388	0.027004	0.437411	skr-14	The skr-14 gene encodes a homolog of Skp1 in S. cerevisiae that has no known function in vivo, since skr-14(RNAi) animals are at least superficially normal.
WBGene00013508	F25D7.3	0.671864	1.59313	0.0198978	0.363114	blmp-1	blmp-1 encodes a zinc finger and SET domain-containing protein that is the C. elegans BLIMP1 (B lymphocyte-induced maturation protein 1) ortholog\; loss of blmp-1 activity via deletion mutation has been reported to result in small, dumpy animals with abnormal fat content, while loss of blmp-1 activity via RNAi reportedly results in animals that are small, dumpy, have an amorphous pharynx, and are…
WBGene00013509	M04G12.4	0.671649	1.59289	0.0128166	0.293954	somi-1	N.A.
WBGene00045058	C07D10.5	0.671301	1.59251	0.0326062	0.479491	C07D10.5	N.A.
WBGene00022103	Y46H3C.7	0.669953	1.59102	0.0147958	0.317228	Y46H3C.7	N.A.
WBGene00022112	F55D10.3	0.662361	1.58267	0.0177772	0.348737	glit-1	N.A.
WBGene00003006	T08E11.4	0.662332	1.58264	0.0494725	0.583644	math-41	N.A.
WBGene00022129	F08G12.1	0.660865	1.58103	0.0354547	0.501243	F08G12.1	N.A.
WBGene00003111	T11B7.1	0.656979	1.57678	0.00961981	0.25388	T11B7.1	N.A.
WBGene00022180	2RSSE.1	0.656864	1.57665	0.011941	0.285583	rga-9	2RSSE.1 encodes a protein that contains a RhoGAP domain and that is similar to Drosophila RhoGAP71E whose activity regulates the number and guidance of mushroom body axons.
WBGene00022181	Y38F1A.5	0.655841	1.57553	0.0336414	0.486268	cyd-1	cyd-1 encodes a cyclin D homolog that is required for escape from G1 cycle arrest in postembryonic blast cells, affects movement and larval viability, and may physically interact with CDK-46 and CKI-1\; expressed embryonically primarily in the head, ventral cord, tail, and is later expressed primarily in the seam cells and in the somatic gonad.
WBGene00022236	F42G2.6	0.64812	1.56712	0.0347441	0.494813	ceh-86	ceh-86 encodes a homeodomain-containing protein with one homeodomain\; it lies on chromosome II near a repetitive region where several other divergent homeobox genes are found\; ceh-86(RNAi) performed in the background of C. elegans retinoblastoma pathway mutants results in a number of phenotypes that suggest ceh-86 plays a role in the normal development and\/or survival of the animal\; a ceh-86:…
WBGene00022242	C06G1.4	0.646371	1.56523	0.013861	0.311031	ain-1	ain-1 encodes an unfamiliar protein synergistically required, withLIN-31, for the normal timing of vulval differentiation, independentlyof LET-60\/RAS, and parallel to or downstream of LIN-14\/LIN-28\/HBL-1\;AIN-1 is expressed in cytoplasmic foci (that are probably P bodies) inseveral tissues, including vulval precursor cells and neurons\; AIN-1coimmunoprecipitates with DCR-1 and ALG-1, also bind…
WBGene00001853	F59D6.3	0.640405	1.55877	0.0434619	0.550511	asp-8	N.A.
WBGene00022261	C44F1.1	0.639256	1.55753	0.0389661	0.520809	C44F1.1	N.A.
WBGene00022274	F53H10.2	0.638288	1.55648	0.00414735	0.16151	saeg-1	N.A.
WBGene00013531	R13G10.1	0.637561	1.5557	0.0066396	0.214663	dpy-27	dpy-27 encodes an ATP-binding protein that is a homolog of the SMC4 subunit of mitotic condensin\; DPY-27, in combination with other proteins including MIX-1, act as a unit to repress X-linked gene expression during hermaphrodite dosage compensation\; in XX oocytes and early embryos, DPY-27 exhibits diffuse nuclear localization, but by the 30-cell stage of embryogenesis, DPY-27 specifically local…
WBGene00022283	ZK1236.2	0.635315	1.55328	0.00933245	0.252573	cec-1	cec-1 encodes a nuclear protein with a chromodomain that is ubiquitously expressed in somatic cells, but is dispensable for embryonic survival or gross adult morphology.
WBGene00004024	R11E3.2	0.631403	1.54907	0.0397244	0.52328	R11E3.2	N.A.
WBGene00001724	F40F4.3	0.629511	1.54704	0.0244664	0.412184	lbp-1	lbp-1 encodes a predicted secreted fatty acid binding protein (FABP) that is similar to the Ascaris suum secreted FABP As-p18\; by homology, LBP-1 is predicted to function in sequestering or transporting small hydrophobic molecules such as lipids and steroid hormones\; an lbp-1::gfp promoter fusion is expressed in the embryo, beginning at gastrulation, in presumptive hypodermal precursors\; lbp-1…
WBGene00013543	T22H6.2	0.627297	1.54467	0.00974395	0.255655	alh-13	N.A.
WBGene00012420	D1009.2	0.618119	1.53487	0.0220379	0.38952	cyn-8	cyn-8 encodes a peptidyl-propyl cis-trans isomerase of the cyclophilin family\; cyclophilins are implicated in protein folding, however the precise role of cyn-8 is not known\; a CYN-8-fusion protein localises specifically to gut cell nuclei.
WBGene00022349	F59C12.3	0.616061	1.53268	0.0365825	0.507563	F59C12.3	N.A.
WBGene00022352	K11C4.4	0.614694	1.53123	0.0114147	0.279889	odc-1	odc-1 encodes ornithine decarboxylase, the first enzyme of polyamine biosynthesis that catalyzes the conversion of ornithine to putrescine\; ODC-1 is required for development when animals are deprived of exogenous polyamines, which are required for oogenesis and completion of embryogenesis\; in addition,ODC-1 may contribute to male fertility\; ODC-1 activity is detectable at all developmental sta…
WBGene00013852	K10D6.4	0.608932	1.52513	0.0378977	0.514173	K10D6.4	N.A.
WBGene00022517	T08H4.1	0.604514	1.52047	0.0460539	0.565328	rhgf-2	rhgf-2 encodes a Rho guanyl-nucleotide exchange factor (RhoGEF) with similarity to the mammalian PLEKHG5\/Tech\/Syx RhoGEFs\; rhgf-2 is required for embryonic morphogenesis, larval development, and regulation of locomotion\; when expressed in mammalian neuronal tissue culture cells, RHGF-2 induces cell rounding inhibits neurite outgrowth\; RHGF-2 functions as a RhoGEF for the RHO-1 GTPase\; RHGF-…
WBGene00022504	Y71H2AM.16	0.598803	1.51446	0.0447086	0.557245	pho-9	N.A.
WBGene00003104	F54B11.6	0.588233	1.5034	0.045956	0.565328	bra-1	bra-1 is an ortholog of human ZMYND11 (zinc finger MYND-type containing 11) and ZMYND8 (zinc finger MYND-type containing 8)\; bra-1 is involved in negative regulation of transforming growth factor beta receptor signaling pathway, and its activity is required for normal adult lifespan\; bra-1 exhibits receptor binding activity\; bra-1 is expressed in the nervous system\; bra-1 is localized to the …
NA	B0273.4	0.583977	1.49898	0.0377235	0.513953	unc-5	unc-5 encodes a netrin receptor\; unc-5 activity is required cell autonomously for dorsalward cell and pioneer motor axon migrations along the body wall that are essential for normal locomotion and gonad development\; unc-5 mRNAs are expressed throughout the entire life cycle, with increasing levels seen as animals progess to adulthood.
WBGene00013856	M05B5.5	0.583745	1.49873	0.0263004	0.431104	hlh-2	hlh-2 encodes a Class I basic helix-loop-helix (bHLH) transcription factor that is the C. elegans ortholog of the mammalian E and Drosophila Daughterless transcriptional activators\; HLH-2 activity is required for cell fate specifications occuring during embryonic and larval development that affect such processes as gonadogenesis, male tail formation, and programmed cell death\; HLH-2 has been sh…
WBGene00022539	F57C7.3	0.583475	1.49845	0.0191172	0.358912	sdn-1	sdn-1 encodes a homolog of vertebrate syndecan-2, a type I transmembrane heparan sulfate proteoglycan\; by homology, SDN-1 is predicted to play a role in cell-cell and cell-matrix adhesion\; loss of sdn-1 activity via RNA-mediated interference (RNAi) indicates that SDN-1 is required for backward locomotion and for normal development of the egg-laying system, particularly gonadal and vulval struct…
WBGene00022564	F11A6.1	0.580211	1.49507	0.0118113	0.283429	kpc-1	kpc-1 encodes two isoforms of a Kex2\/subtilisin-like proprotein convertase that is a member of the subtilase family of calcium-dependent serine endoproteinases that includes mammalian furin (OMIM:136950) and Saccharomyces cerevisiae Kex2p\; KPC-1 is required for normal growth and locomotion and is likely responsible for the processing of transforming growth factor (TGF) beta proproteins encoded …
WBGene00022554	T04D1.4	0.576958	1.4917	0.043313	0.550017	chd-7	N.A.
WBGene00022591	T28F12.2	0.566118	1.48053	0.0276642	0.441316	unc-62	unc-62 encodes a Meis-class homeodomain protein required for posterior embryonic morphogenesis, male tail morphogenesis, commissure formation by VD and DD motor neurons, vulval morphogenesis, and normal locomotion\; UNC-62 is orthologous to Drosophila HOMOTHORAX\; both maternal-effect unc-62 alleles and the zygotic lethal unc-62(s472) allele phenotypically resemble mutations of the caudal ortholo…
WBGene00022601	W01C8.5	0.563835	1.47819	0.0495149	0.583644	W01C8.5	N.A.
WBGene00001429	F25F2.2	0.558125	1.47235	0.0361434	0.505602	cdh-4	cdh-4 encodes a Fat-like cadherin homolog\; CDH-4 is required for axon fasciculation, cell migration, and hypodermis and pharyngeal development\; in addition, CDH-4 functions together with the FMI-1 flamingo-like cadherin to regulate development of the GABAergic VD motorneurons\; cdh-4 is widely expressed beginning early in development, but by the L3 larval stage expression is confined to the VD …
WBGene00000620	Y38C1AA.4	0.557016	1.47122	0.0287704	0.452989	tcl-2	N.A.
WBGene00013847	T14G8.1	0.548643	1.46271	0.0136435	0.307173	chd-3	chd-3 encodes a PHD-finger SNF2 family member containing a chromo domain and a C-terminal helicase domain that affects Notch-dependent vulval development\; expressed in virtually all embryonic cells and in many larval nuclei.
WBGene00013849	F36D3.1	0.546698	1.46074	0.0158464	0.329234	F36D3.1	N.A.
WBGene00013850	C32E12.5	0.544196	1.45821	0.049934	0.586083	sem-2	sem-2 encodes an HMG-box transcription factor that affects the migration, division, and cell-fate of the 2 sex myoblasts, and also affects embryonic viability, elongation of embryos, egg laying, anterior body-wall muscle development, and organization of the anterior hypodermis.
WBGene00014180	C05D9.5	0.543824	1.45783	0.0327604	0.479491	ife-4	The ife-4 gene encodes a member of the Initiation Factor 4E (eIF4E) family.
WBGene00014199	C01F1.3	0.542939	1.45694	0.034285	0.491357	rml-4	N.A.
WBGene00006367	F46A9.6	0.542914	1.45691	0.0488042	0.579775	mec-8	mec-8 encodes a protein with two RNA recognition motifs (RRM)\; mec-8 is required for proper development of body wall muscle and chemosensory and touch receptor neurons and as a result, for embryonic and larval development, sensory neuron fasciculation, and mechanosensation\; MEC-8 functions as an mRNA processing factor whose activity is required for alternative splicing of genes such as unc-52\/…
WBGene00004174	F08G12.10	0.541475	1.45546	0.0346106	0.494474	inx-2	N.A.
WBGene00000414	T22D2.1	0.540929	1.45491	0.0323777	0.478993	vab-19	vab-19 encodes an ankyrin repeat-containing protein that is a member of a conserved family of proteins that includes human Kank, a predicted tumor suppressor\; during embryonic morphogenesis, vab-19 activity is essential for epidermal elongation and proper attachment of muscle to the epidermis, specifically the localization of attachment structures to muscle-adjacent regions of epidermal cells an…
WBGene00000650	F54D5.5	0.540281	1.45426	0.0263298	0.431104	F54D5.5	N.A.
WBGene00006947	W06H12.1	0.53757	1.45153	0.0145301	0.315545	ztf-6	N.A.
WBGene00006956	M142.1	0.535447	1.44939	0.0218447	0.388139	unc-119	unc-119 encodes a novel protein that is highly conserved amongst metazoans\; unc-119 activity is required for proper development of the nervous system, including axonal branching and fasciculation, and hence, for normal movement, chemosensation, and feeding\; unc-119 is expressed pan-neuronally beginning in the early embryo (~60 cells) and continuing through adulthood\; although the molecular fun…
WBGene00022679	H28G03.2	0.529655	1.44358	0.0394246	0.522793	H28G03.2	N.A.
WBGene00000433	C33G3.4	0.527389	1.44132	0.0473127	0.570205	C33G3.4	C33G3.4 is orthologous to the human gene BETA-MANNOSIDASE (MANBA\; OMIM:248510), which when mutated leads to disease.
WBGene00013959	M88.6	0.526359	1.44029	0.0434511	0.550511	pan-1	pan-1 encodes a novel predicted transmembrane protein with extracellular leucine-rich repeats\; loss of PAN-1 activity via RNAi results in molting defects and arrested L2-sized larvae, indicating that PAN-1 is required for completion of the larval molts\; pan-1 expression is enriched in the germline and upregulated in animals mutant for unc-95, which encodes a LIM domain-containing protein that l…
WBGene00013962	F52H3.3	0.524246	1.43818	0.0123935	0.28817	bath-38	N.A.
WBGene00006544	F15D3.1	0.519345	1.4333	0.0273152	0.437486	dys-1	The dys-1 gene encodes an ortholog of human DMD, which when mutated leads to Duchenne muscular dystrophy (OMIM:310200).
WBGene00006952	C16H3.3	0.515912	1.4299	0.0488376	0.579775	C16H3.3	N.A.
WBGene00013982	C17E4.20	0.512819	1.42684	0.0194307	0.360387	C17E4.20	N.A.
WBGene00000425	B0403.4	0.50529	1.41941	0.0143294	0.315545	pdi-6	N.A.
WBGene00001118	F53H8.1	0.50296	1.41712	0.022535	0.395471	apm-3	apm-3 encodes an adaptin, orthologous to the mu3 subunit of adaptor protein complex 3 (AP-3)\; APM-3 is also orthologous to human HPS, which when mutated leads to Hermansky-Pudlak syndrome (OMIM:203300)\; based on structural similarity, APM-3 is predicted to be involved in the formation of intracellular transport vesicles, and genetic analyses indicate that apm-3 activity is required for biogenes…
WBGene00022644	C30F8.4	0.501701	1.41588	0.0369081	0.508939	kin-32	kin-32 encodes, by alternative splicing, two isoforms of a focal adhesion kinase, orthologous to human PTK2 (OMIM:600758) and PTK2B (OMIM:601212)\; KIN-32 is expressed in both nuclei and cytoplasms of larval and adult bodywall muscle cells\; KIN-32 is also expressed in head neurons, a head mesodermal cell, adult vulval muscle, and the reproductive system\; KIN-32 has an N-terminal FERM domain, a …
WBGene00004992	K11E4.4	0.501241	1.41543	0.0325799	0.479491	pix-1	pix-1 is encodes a GTPase activator protein that forms a highly conserved signaling complex with GIT-1 and PAK, and interacts with Rac\/CDC42 GTPases\; pix-1 is orthologous to mammalian alpha-pix (OMIM: 300267)\; PIX-1 work together with GIT-1 and PAK-1 independently of RAC\/CDC-42 GTPases to control DTC migration during gonad morphogenesis\; in epithelial morphogenesis, PIX-1, GIT-1 and PAK-1 to…
WBGene00014039	M01E11.7	0.500387	1.41459	0.0375418	0.513953	tns-1	N.A.
WBGene00200998	F22F4.2	0.498431	1.41268	0.0347463	0.494813	inx-3	N.A.
WBGene00014067	2L52.1	0.493989	1.40833	0.0441226	0.551591	2L52.1	2L52.1 encodes a protein with sequence similarity to GLI-family zinc-finger transcription factors\; deletion mutations in 2L52.1 are reported to be homozygous viable.
WBGene00002085	T07C5.1	0.482052	1.39673	0.0308397	0.468088	ugt-50	N.A.
WBGene00014074	Y47D7A.1	0.472184	1.38721	0.0159742	0.330412	skr-7	The skr-7 gene encodes a homolog of Skp1 in S. cerevisiae that is required for posterior body morphogenesis, embryonic and larval development, and cell proliferation.
WBGene00022816	R119.5	0.464163	1.37952	0.0492059	0.582608	R119.5	N.A.
WBGene00014089	C34F11.9	0.447397	1.36358	0.0360127	0.505377	dsh-1	dsh-1 encodes a homolog of Drosophila DISHEVELED and a paralog of MIG-5 (and DSH-2)\; DSH-1 appears to be required for Wnt-induced endoderm specification in the EMS blastomere, and may influence HSN migration as well\; DSH-1, along with LIN-17, CAM-1, and CWN-2, functions as part of a Wnt signaling pathway that regulates ACR-16 localization to postsynaptic regions, a key component of activity-dep…
WBGene00014136	B0416.6	0.44477	1.3611	0.0320549	0.477479	gly-13	gly-13 encodes an experimentally verified UDP-N-acetylglucosamine alpha-3-D-mannoside beta-1,2-N-acetylglucosaminyltransferase I (GnT I), that is the primary GnT I enzyme in vivo, and that can act on unusual substrates\; gly-13 is expressed throughout development in many cell types\; a deletion allele of gly-13 is partially lethal with survivors displaying severe morphological and behavioral defe…
WBGene00000469	R11B5.1	0.441586	1.3581	0.0487005	0.579775	tbc-12	N.A.
WBGene00014153	B0410.2	0.436854	1.35365	0.0308816	0.468088	vang-1	vang-1 encodes an ortholog of Drosophila STRABISMUS\/VAN GOGH\; vang-1 enables Wnt-directed planar cell polarity\; VANG-1 is required for the fully asymmetrical division of B.a versus B.p cells, though this requirement is quantitatively weak\; vang-1 also negatively regulates adult lifespan via the DAF-2\/IGFR insulin signaling pathway, and also plays a role in thermal tolerance and response to o…
WBGene00014156	K02E10.2	0.434219	1.35118	0.0301436	0.463532	hid-1	hid-1 encodes a putative transmembrane protein, evolutionarily conservedamong eukaryotes but unfamiliar, that is required for negative regulationof dauer formation, along with normal locomotion and defecation\; HID-1 isparalogous to C47D12.2 and dymeclin (OMIM:607461)\; hid-1 is expressed inneurons of the head, tail, and ventral nerve cord\; hid-1 mutations aresuppressed by akt-1 and daf-16 mutat…
WBGene00014159	F18H3.3	0.432136	1.34923	0.0476097	0.571741	pab-2	pab-2 encodes a polyadenylate-binding protein 1 homolog with high similarity to human PABP 1.
WBGene00022837	D2021.1	0.430462	1.34767	0.0364429	0.506669	utx-1	utx-1 encodes a putative histone H3 di\/trimethyllysine-27 (H3K27me2\/me3) demethylase, required for embryonic viability and vulval development, and for high brood sizes, locomotion, and growth sizes\; UTX-1 contains a JmjC domain, is orthologous to human UTX and UTY, and is paralogous to human JMJD3\; by orthology, UTX-1 is expected to antagonize transcriptional repression by polycomb repressor …
T07D3.7	0.355461	1.27939	0.0322966	0.478628	alg-2	alg-2 encodes a PAZ and PIWI-domain containing protein that is a member of the highly conserved eukaryotic RDE-1\/AGO1\/PIWI family of proteins that regulate posttranscriptional gene silencing (PTGS)\; ALG-2 functions with ALG-1 to control specific developmental timing events by positively regulating expression of small temporal RNAs (stRNAs) encoded by lin-4 and let-7\; ALG-2 and ALG-1 are also …
C55B7.4	-0.330441	0.795293	0.0489046	0.580059	acdh-1	acdh-1 encodes a short-chain acyl-CoA dehydrogenase\; ACDH-1 is predicted to be a mitochondrial enzyme that catalyzes the first step of fatty acid beta-oxidation and thus plays a key role in energy production\; steady-state acdh-1 mRNA levels are under the control of the MDT-15 mediator complex subunit\; in addition, gene expression studies indicate that acdh-1 expression is upregulated in daf-2 …
C04F6.1	-0.358556	0.779945	0.0462609	0.565328	vit-5	vit-5 encodes a vitellogenin, a lipid-binding protein precursor related to vertebrate vitellogenins and mammalian ApoB-100, a core LDL particle constituent\; by homology, VIT-5 is predicted to function as a lipid transport protein\; loss of vit-5 activity via large-scale RNA-mediated interference (RNAi) screens indicates that VIT-5 is required for embryogenesis and normal rates of postembryonic g…
Y38F1A.6	-0.362987	0.777553	0.0251971	0.418483	hphd-1	N.A.
ZK822.5	-0.376519	0.770294	0.0459657	0.565328	ZK822.5	N.A.
R01E6.3	-0.377631	0.7697	0.0480454	0.574925	cah-4	cah-4 encodes a carbonic anhydrase homolog, which is rather divergent from other such homologs in C. elegans (with at most 38\% identity to any other carbonic anhydrase, in or out of C. elegans)\; it is individually dispensable for viability and for grossly normal postembryonic morphology, and thus may have a more subtle biological function than the basic cytoprotective functions expected for car…
F29G6.3	-0.378721	0.769119	0.018811	0.356545	hpo-34	N.A.
Y43C5A.2	-0.388547	0.763899	0.0476651	0.571896	Y43C5A.2	N.A.
C09B8.4	-0.390127	0.763062	0.0440729	0.551591	C09B8.4	N.A.
M02F4.8	-0.398209	0.758799	0.0334457	0.486045	aqp-7	aqp-7 encodes an aquaglyceroporin whose expression in Xenopus oocytes increases either water or glycerol permeability five- to seven-fold\; AQP-7 has no function in mass RNAi assays, perhaps reflecting genetic redundancy with its several paralogs\; AQP-7 is expressed in muscle punctae (perhaps focal adhesions).
F49E2.5	-0.399839	0.757943	0.0279015	0.442683	F49E2.5	N.A.
F57F5.1	-0.407104	0.754136	0.0219903	0.38922	cpr-9	N.A.
M03B6.2	-0.411982	0.75159	0.0356817	0.502825	mct-3	N.A.
T07D3.9	-0.412134	0.751511	0.0396612	0.52328	T07D3.9	N.A.
C17C3.12	-0.418631	0.748134	0.0339276	0.488833	acdh-2	acdh-2 encodes a short-chain acyl-CoA dehydrogenase\; ACDH-2 is predicted to be a mitochondrial enzyme that catalyzes the first step of fatty acid beta-oxidation and thus plays a key role in energy production\; steady-state acdh-2 mRNA levels are under the control of the MDT-15 mediator complex subunit\; in addition, gene expression studies indicate that acdh-2 expression is downregulated in fast…
W08D2.4	-0.425019	0.744829	0.0278233	0.442396	fat-3	fat-3 encodes a delta-6 fatty acid desaturase ('linoleoyl-CoA desaturase') containing an N-terminal cytochrome b5 domain that is orthologous to the vertebrate fatty acid desaturases (FADS)\; FAT-3 expressed in yeast uses linoleic and alpha-linolenic acid as substrates\; FAT-3 is absolutely required in vivo for synthesis of delta-6 fatty acids, and also required for fully normal synthesis of C20 f…
D1037.2	-0.434571	0.739914	0.0280903	0.444478	smp-2	N.A.
Y40H7A.10	-0.437312	0.738509	0.036289	0.505602	Y40H7A.10	N.A.
F55F3.3	-0.449263	0.732417	0.0139253	0.311437	nkb-3	N.A.
F55B11.2	-0.459802	0.727086	0.0416554	0.538088	F55B11.2	N.A.
K08F8.1	-0.460128	0.726922	0.0393558	0.522793	mak-1	N.A.
F08F3.3	-0.465565	0.724187	0.0421569	0.540425	rhr-1	rhr-1 encodes an ortholog of human Rhesus blood-group associated glycoprotein (RHAG\; OMIM:180297, mutated in chronic hemolytic anemia), a member of the ammonium transporter family, and affects general levels of mRNA transcripts, and embryonic viability in a large-scale RNAi screen.
K08F8.4	-0.467087	0.723424	0.0321836	0.477479	pah-1	pah-1 encodes a biochemically active phenylalanine-4-hydroxylase orthologous to human PAH\; recombinant PAH-1 has hydroxylase activity on phenylalanine and tryptophan substrates in vitro\; pah-1 is expressed in seam cells, tail hypodermal cells, and ventral hypodermis, with stronger posterior than anterior expression\; PAH-1 might help provide tyrosine for cross-linking in the cuticle, and is par…
C46F4.2	-0.470714	0.721607	0.0459528	0.565328	acs-17	N.A.
F28A12.4	-0.476427	0.718756	0.0144155	0.315545	asp-13	N.A.
M01F1.5	-0.484242	0.714873	0.0462953	0.565328	hmit-1.3	hmit-1.3 encodes one of three C. elegans proton (H+)-dependent myo-inositol transporters\; loss of hmit-1.3 activity via large-scale RNAi result in no obvious abnormalities but by homology, HMIT-1.3 is predicted to function as a plasma membrane protein required for the regulated uptake of myo-inositol and thus potentially for regulation of cell signaling and intracellular osmolarity.
F18E3.7	-0.499545	0.70733	0.00949806	0.252791	ddo-2	ddo-2 encodes a D-aspartate oxidase (DASPO), paralogous to DDO-1 and DDO-3\; recombinant DDO-2 protein has DASPO acvitity on acidic D-amino acid substrates (e.g., D-aspartate, D-glutamate, or N-methyl-D-aspartate\/NMDA), with highest catalytic efficiency on D-aspartate or D-glutamate\; ddo-2 is required for viability in mass RNAi assays.
F21C10.10	-0.503109	0.705585	0.0181467	0.352354	F21C10.10	N.A.
Y54G2A.11	-0.503988	0.705155	0.0189961	0.35814	Y54G2A.11	N.A.
F18E2.1	-0.509186	0.702619	0.00464805	0.174683	papl-1	N.A.
D1086.6	-0.512865	0.700829	0.00315274	0.137154	D1086.6	N.A.
R07B1.4	-0.516478	0.699076	0.0183156	0.353874	gst-36	N.A.
Y102A11A.3	-0.517367	0.698646	0.012303	0.287711	Y102A11A.3	N.A.
E03E2.1	-0.518553	0.698071	0.0315888	0.473867	cyp-43A1	N.A.
C08B6.1	-0.52246	0.696184	0.010497	0.267099	ugt-17	N.A.
ZK930.2	-0.524313	0.69529	0.0381141	0.515037	ZK930.2	N.A.
C17C3.1	-0.528253	0.693394	0.0198863	0.363114	C17C3.1	N.A.
W01B11.6	-0.533717	0.690773	0.0242311	0.410749	W01B11.6	N.A.
T21C9.6	-0.534653	0.690324	0.0264226	0.431921	T21C9.6	N.A.
F22A3.1	-0.536037	0.689663	0.0447865	0.557702	ets-4	N.A.
K07C10.1	-0.539247	0.68813	0.0461756	0.565328	ptr-13	ptr-13 encodes a nematode-specific member of the sterol sensing domain(SSD) proteins, distantly paralogous to Drosophila PATCHED (PTC) andhuman PTCH (OMIM:601309, mutated in basal cell nevus syndrome)\; PTR-13is weakly required for normal molting from L4 to adult stages\; PTR-13 isalso required for normal growth to full size and locomotion.
F21D12.1	-0.54305	0.686319	0.0231122	0.401797	nhr-21	N.A.
Y16B4A.2	-0.543619	0.686048	0.00241213	0.117437	Y16B4A.2	N.A.
F41E6.5	-0.54913	0.683432	0.0431772	0.54881	F41E6.5	N.A.
F25F8.2	-0.552823	0.681685	0.0407653	0.531684	glc-2	glc-2 encodes the beta subunit of a glutamate-gated chloride channel\; in vivo, GLC-2 is capable of forming homomeric glutamate-activated channels, as well as heteromeric channels with GLC-1 that can be activated by glutamate and avermectins, antihelmintics that inhibit pharyngeal pumping\; as loss of glc-2 activity via large-scale RNAi screens does not result in any obvious abnormalities, the pr…
C06B3.6	-0.553042	0.681581	0.00953832	0.252791	C06B3.6	N.A.
K02D7.5	-0.559898	0.67835	0.0259869	0.427423	swt-1	N.A.
K03H6.2	-0.562644	0.67706	0.0329713	0.48068	txt-4	N.A.
ZC376.2	-0.564049	0.676401	0.0209695	0.376557	cest-2.2	N.A.
C56E10.4	-0.564652	0.676118	0.0237257	0.406984	nhr-137	N.A.
F32A5.2	-0.565326	0.675803	0.0455304	0.562807	skpo-3	N.A.
T08A9.11	-0.566346	0.675325	0.0250791	0.417464	ttr-59	N.A.
T11F9.3	-0.566506	0.67525	0.0287863	0.452989	nas-20	nas-20 encodes an astacin-like metalloprotease.
Y119C1B.9	-0.568713	0.674218	0.049553	0.583644	zig-9	N.A.
F32A5.5	-0.574638	0.671455	0.0195814	0.361251	aqp-1	aqp-1 encodes, by alternative splicing, two isoforms of an aquaglyceroporin required for normally short lifespan\; AQP-1 expression is upregulated under daf-2(-) conditions, and loss of AQP-1 function in daf-2 mutant animals results in reduced lifespan\; AQP-1 increases glycerol permeability five- to seven-fold when expressed in Xenopus oocytes\; AQP-1::GFP fusion proteins are expressed predomina…
F46C5.10	-0.575691	0.670965	0.0420488	0.539839	F46C5.10	N.A.
D2096.3	-0.579523	0.669185	0.038909	0.520809	aagr-1	N.A.
K10H10.2	-0.581372	0.668328	0.0294657	0.458333	cysl-2	cysl-2 encodes a homolog of sulfhydrylases\/cysteine synthases.
C09F9.3	-0.594037	0.662486	0.0474977	0.571413	glna-1	N.A.
R06C7.3	-0.595523	0.661804	0.0271354	0.437486	dhp-1	dhp-1 encodes a homolog of the human gene DPYS, which when mutated leads to dihydropyrimidinuria (OMIM:222748).
R10D12.1	-0.597005	0.661125	0.03987	0.52399	R10D12.1	N.A.
F11F1.1	-0.597217	0.661028	0.0278507	0.442396	F11F1.1	N.A.
F11A5.10	-0.599538	0.659965	0.0389544	0.520809	glc-1	glc-1 encodes the alpha subunit of a glutamate-gated chloride channel and forms a functional channel in Xenopus oocytes\; mutations genetically interact with avr-14 and avr-15 mutations such that triple mutants exhibit high level resistance to ivermectin.
F56F10.3	-0.60176	0.65895	0.0384691	0.518277	cdo-1	cdo-1 encodes the C. elegans cysteine dioxygenase ortholog\; by homology to mammalian enzymes, CDO-1 is predicted to function in cysteine catabolism by catalyzing the oxidation of cysteine to cysteine sulfanate.
F17C11.11	-0.606517	0.65678	0.00107331	0.076717	F17C11.11	N.A.
R10F2.6	-0.606978	0.656571	0.0358786	0.504546	R10F2.6	N.A.
R09H10.5	-0.610509	0.654966	0.0171819	0.344433	R09H10.5	N.A.
F32D8.12	-0.610616	0.654917	0.00908097	0.248914	F32D8.12	N.A.
F25E5.8	-0.612638	0.654	0.0031844	0.138086	F25E5.8	N.A.
H23N18.1	-0.613994	0.653386	0.0484533	0.578267	ugt-13	N.A.
F19H8.1	-0.614403	0.6532	0.0210944	0.377794	tps-2	tps-2 encodes one of two trehalose-6-phosphate synthase proteins in C. elegans, and RNAi of both enzymes leads to a more than 90\% reduction decrease in trehalose levels, but does not appear to affect viability or development\; the tps-2 mRNA is expressed throughout development.
F01D4.2	-0.616611	0.652201	0.030378	0.463962	ugt-44	N.A.
C33A12.19	-0.620318	0.650527	0.0465952	0.566213	C33A12.19	N.A.
C49C3.1	-0.620674	0.650367	0.0412504	0.534907	snf-9	N.A.
R12C12.9	-0.620877	0.650276	0.0327595	0.479491	R12C12.9	N.A.
ZK1037.6	-0.621372	0.650053	0.0352256	0.499529	ZK1037.6	N.A.
ZK550.6	-0.626486	0.647752	0.0206592	0.372473	ZK550.6	The ZK550.6 gene encodes an ortholog of the human gene PHYTANOYL-COA HYDROXYLASE (PHYH\; PAHX\; OMIM:602026), which when mutated leads to Refsum disease (OMIM:266500).
T13C5.5	-0.627267	0.647402	0.019555	0.361251	bca-1	bca-1 encodes a member of the carbonic anhydrase family.
C03E10.5	-0.627524	0.647286	0.0280365	0.444302	clec-223	N.A.
DH11.3	-0.630598	0.645909	0.0170181	0.343058	pgp-11	pgp-11 encodes an ATP-binding protein that is a member of the P-glycoprotein subclass of the ATP-binding cassette (ABC) transporter superfamily\; pgp-11 is predicted to function as a transmembrane protein that couples energy to transport of various molecules across membranes\; RNAi experiments indicate that pgp-11 is required for efficient RNA interference in the germline\; pgp-11 promoter-gfp fu…
K11G12.1	-0.63277	0.644937	0.00789537	0.228507	nas-11	nas-11 encodes an astacin-like metalloprotease\; loss of nas-11 activity via RNAi has been reported to result in slow growth\; large-scale expression studies reveal that a nas-11::GFP promoter fusion is expressed in the hypodermis and the nervous system.
F47G6.4	-0.641726	0.640945	0.041171	0.534907	spe-15	spe-15 encodes an unconventional myosin, and is homologous to Drosophila and mouse myosin VI as well as the human gene MYOSIN VI (MYO6\; OMIM:600970), which when mutated leads to a disease that affects hearing\; spe-15 is required during spermiogenesis or sperm activation for the asymmetric partitioning of organelles like the mitochondria and specialized structures called the fibrous-body membran…
T02G5.4	-0.642316	0.640684	0.001377	0.0913738	T02G5.4	N.A.
F46G10.4	-0.644414	0.639753	0.0307808	0.467994	F46G10.4	N.A.
C53C7.5	-0.64937	0.637559	0.0479663	0.574488	C53C7.5	N.A.
F59E11.11	-0.650008	0.637277	0.0346125	0.494474	nhr-143	N.A.
T08B1.6	-0.651317	0.636699	0.0368291	0.508939	acs-3	N.A.
C34D10.2	-0.657221	0.634098	0.000788826	0.0639586	unk-1	N.A.
T05C3.6	-0.660264	0.632763	0.00821457	0.234707	T05C3.6	The T05C3.6 gene encodes a paralog of T05C3.2, a protein with NACHT and WD domains that may be involved in apoptosis.
AC3.7	-0.668227	0.62928	0.0404781	0.529988	ugt-1	N.A.
F13G11.3	-0.681568	0.623487	0.0237503	0.406984	ule-2	N.A.
B0457.2	-0.682329	0.623159	0.0132719	0.300814	B0457.2	N.A.
C28H8.11	-0.68337	0.622709	0.00180952	0.101258	tdo-2	N.A.
T21D12.9	-0.690431	0.619669	0.0156524	0.327776	sma-10	sma-10 encodes a protein containing leucine rich-repeats and immunoglobulin-like domains that is a member of the LRIG family of transmembrane proteins\; sma-10 functions to regulate the TGFbeta signaling pathway that controls body size\; consistent with genetic epistasis analysis suggesting that SMA-10 acts between the DBL-1\/TGFbeta ligand and the SMA-6\/TGFbeta receptor in the SMA-6\/DAF-4 sign…
K09C4.5	-0.692805	0.61865	0.0141285	0.314465	K09C4.5	N.A.
Y34B4A.5	-0.698516	0.616206	0.0276845	0.441316	Y34B4A.5	N.A.
B0410.3	-0.701645	0.614871	0.0465353	0.566213	B0410.3	N.A.
ZK512.7	-0.710565	0.611081	0.0293456	0.457776	ZK512.7	N.A.
F13H8.3	-0.711738	0.610584	0.0390389	0.520902	F13H8.3	N.A.
F18E3.11	-0.714233	0.609529	0.0108393	0.272722	F18E3.11	N.A.
ZC455.6	-0.714934	0.609233	0.0437601	0.550511	ugt-5	N.A.
T03E6.8	-0.715432	0.609023	0.0351423	0.499132	T03E6.8	N.A.
B0393.9	-0.730195	0.602822	0.0368572	0.508939	B0393.9	N.A.
C30G7.1	-0.732175	0.601996	0.0246279	0.412244	hil-1	N.A.
T12A7.6	-0.739231	0.599058	0.0187805	0.356545	T12A7.6	N.A.
C06G8.1	-0.740433	0.59856	0.00110945	0.0783351	swt-3	N.A.
C04F5.7	-0.744118	0.597033	0.0192767	0.360063	ugt-63	N.A.
C39B5.5	-0.749875	0.594655	0.0234074	0.404709	C39B5.5	N.A.
F08A8.2	-0.750674	0.594326	0.000279132	0.038808	acox-1.2	N.A.
T14B4.4	-0.751077	0.59416	0.0475981	0.571741	tsp-10	N.A.
K08C7.1	-0.754676	0.59268	0.0305607	0.465697	K08C7.1	N.A.
F08F1.4	-0.755045	0.592528	0.0114889	0.281197	F08F1.4	N.A.
K09D9.2	-0.757719	0.591431	0.00267729	0.124076	cyp-35A3	cyp-35A3 encodes one of over 80 C. elegans cytochrome P450s, NADPH-dependent monooxygenases that metabolize endogenous and exogenous compounds\; loss of cyp-35A\/C gene family activity in the presence of xenobiotics can diminish the reproductive decline seen in wild-type worms treated with the same compounds\; in addition, cyp-35A(RNAi) also results in a reduction of fat content\; cyp-35A3 report…
C10H11.6	-0.758624	0.59106	0.0134276	0.303325	ugt-26	N.A.
R07B7.5	-0.758807	0.590985	0.0241016	0.410557	kmo-1	N.A.
E01A2.10	-0.765991	0.588049	0.00676297	0.215107	poml-3	N.A.
R08E3.2	-0.769758	0.586516	0.0272536	0.437486	not found
F14B8.3	-0.771921	0.585637	0.0207811	0.373671	pes-23	N.A.
F44B9.1	-0.773406	0.585035	0.0386501	0.519677	dpf-6	N.A.
Y43B11AR.1	-0.77386	0.584851	0.03118	0.470351	Y43B11AR.1	N.A.
C35C5.8	-0.775292	0.58427	0.0390502	0.520902	C35C5.8	N.A.
C06B3.3	-0.775584	0.584152	0.000118549	0.0257862	cyp-35C1	cyp-35C1 encodes one of over 80 C. elegans cytochrome P450s, NADPH-dependent monooxygenases that metabolize endogenous and exogenous compounds\; RT-PCR experiments indicate that cyp-35C1 mRNA is upregulated in response to treatment with xenobiotics, such as PCBs (polychlorinated biphenyls) or PAHs (polycyclic aromatic hydrocarbons)\; loss of cyp-35A\/C gene family activity in the presence of xeno…
F55F3.2	-0.784271	0.580645	0.000949664	0.0707578	cest-13	N.A.
F14F9.4	-0.78649	0.579753	0.0487505	0.579775	F14F9.4	N.A.
ZK563.6	-0.786723	0.579659	0.034005	0.488903	acp-1	N.A.
C08A9.1	-0.789543	0.578527	0.0463212	0.565328	sod-3	sod-3 encodes a iron\/manganese superoxide dismutase, predicted to be mitochondrial, that might defend against oxidative stress and promote normal lifespan\; sod-3 mRNA levels are diminished by mutation of daf-16 and chromatin immunoprecipitation (ChIP) studies demonstrate that DAF-16 can directly bind the sod-3 promoter\; heterologously expressed SOD-3 in E. coli protects against methyl viologen…
C33D9.3	-0.789939	0.578369	0.011959	0.285583	C33D9.3	N.A.
T20C7.2	-0.798548	0.574927	0.0373249	0.512145	not found
C34D1.4	-0.80568	0.572093	0.00912376	0.24958	C34D1.4	N.A.
Y67A6A.2	-0.826561	0.563872	0.0392839	0.522662	nhr-62	N.A.
H23N18.3	-0.82939	0.562767	0.00751575	0.227047	ugt-8	N.A.
T05E7.1	-0.838262	0.559317	0.0160751	0.331482	T05E7.1	N.A.
K06B4.11	-0.843854	0.557153	0.0108885	0.272941	nhr-53	N.A.
Y42A5A.3	-0.849752	0.55488	0.0367299	0.508565	Y42A5A.3	N.A.
Y40B10A.2	-0.856521	0.552283	0.00845011	0.239583	comt-3	N.A.
Y53C12A.2	-0.859643	0.551089	0.0436977	0.550511	glt-5	glt-5 encodes an ortholog of glutamate\/aspartate and neutral amino acid transporters.
M176.6	-0.865724	0.548771	0.0495503	0.583644	kin-15	kin-15 encodes a novel receptor protein tyrosine kinase\; like kin-16, with which it is cotranscribed, kin-15 encodes a protein that displays some unusual features, including a very small extracellular domain (50 amino acids) that lacks a cysteine-rich region typical of ligand-binding domains of known receptor tyrosine kinases, an unusual amino acid substitution in the subdomain VI motif, and a l…
ZK856.5	-0.867756	0.547998	0.0170133	0.343058	ZK856.5	N.A.
T21G5.6	-0.870379	0.547003	0.0311084	0.470322	let-383	N.A.
F54B11.11	-0.874996	0.545255	0.0163135	0.333845	F54B11.11	N.A.
C05A9.1	-0.876682	0.544619	0.00664469	0.214663	pgp-5	pgp-5 encodes a transmembrane protein that is a member of the P-glycoprotein subclass of the ATP-binding cassette (ABC) transporter superfamily\; by homology, PGP-5 is predicted to function as an ATP-dependent efflux pump that protects C. elegans by exporting exogenous toxins\; pgp-5 activity is required for defense response to both Gram-negative and Gram-positive bacteria as well as for the resp…
ZK1193.3	-0.893185	0.538424	0.02678	0.435496	not found
Y25C1A.14	-0.907256	0.533198	0.0290288	0.455212	Y25C1A.14	N.A.
Y43C5B.3	-0.908742	0.532649	0.0301839	0.463623	Y43C5B.3	N.A.
Y48E1B.8	-0.918575	0.529031	0.00777307	0.228368	Y48E1B.8	N.A.
T02B5.3	-0.923836	0.527106	0.00408835	0.159813	cest-1.2	N.A.
M176.7	-0.926453	0.52615	0.0417105	0.538191	kin-16	kin-16 encodes a novel receptor protein tyrosine kinase\; like kin-15, with which it is cotranscribed, kin-16 encodes a protein that displays some unusual features, including a very small extracellular domain (50 amino acids) that lacks a cysteine-rich region typical of ligand-binding domains of known receptor tyrosine kinases, an unusual amino acid substitution in the subdomain VI motif, and a l…
F16F9.2	-0.931256	0.524402	0.0467671	0.566213	dpy-6	dpy-6 encodes a novel, conserved protein that has similarity to human MUC2, a component of mucus layers\; dpy-6 activity is required for normal body morphology\; DPY-6 binds bovine calmodulin in vitro in a calcium-dependent manner.
C14C11.1	-0.93703	0.522307	0.0267687	0.435496	C14C11.1	N.A.
F20D6.5	-0.94405	0.519772	0.0461715	0.565328	F20D6.5	N.A.
C40H1.7	-0.949611	0.517772	0.00214708	0.110097	C40H1.7	N.A.
Y46H3B.2	-0.95232	0.516801	0.02373	0.406984	clec-204	N.A.
C50F4.8	-0.958783	0.514491	0.0193131	0.360244	C50F4.8	N.A.
F57F4.3	-0.9625	0.513167	3.75831e-07	0.000337897	gfi-1	gfi-1 encodes a protein that contains 21 ET modules\; interacts with unc-68 in yeast two-hybrid assays.
C03G6.15	-0.979323	0.507218	3.5023e-05	0.011808	cyp-35A2	cyp-35A2 encodes one of over 80 C. elegans cytochrome P450s, NADPH-dependent monooxygenases that metabolize endogenous and exogenous compounds\; RT-PCR experiments indicate that cyp-35A2 mRNA is upregulated in response to treatment with xenobiotics, such as PCBs (polychlorinated biphenyls) or PAHs (polycyclic aromatic hydrocarbons)\; loss of cyp-35A\/C gene family activity in the presence of xeno…
F36A4.5	-0.982602	0.506066	0.0375857	0.513953	F36A4.5	N.A.
C09H5.2	-0.998931	0.500371	0.000538088	0.0520699	catp-3	N.A.
F09C8.1	-1.00337	0.498834	0.0225799	0.395471	F09C8.1	N.A.
Y32F6A.6	-1.01462	0.494958	0.0100231	0.25862	Y32F6A.6	N.A.
F58A3.3	-1.0178	0.493869	0.0110688	0.275921	F58A3.3	N.A.
T26A5.1	-1.03978	0.486402	0.035403	0.501243	wht-6	N.A.
T22B7.7	-1.05771	0.480394	0.000552128	0.0520699	T22B7.7	N.A.
F07A5.2	-1.08357	0.471861	0.0450718	0.558674	F07A5.2	N.A.
C30G12.2	-1.09336	0.468668	0.000266747	0.0386812	C30G12.2	N.A.
Y53F4B.19	-1.10099	0.466197	0.0363245	0.505602	Y53F4B.19	N.A.
F54C8.1	-1.10135	0.46608	0.0272172	0.437486	F54C8.1	N.A.
C14F5.2	-1.10681	0.46432	0.00433524	0.166094	zig-3	zig-3 encodes a predicted secreted protein that is a member of the immunoglobulin superfamily of proteins\; a zig-3::gfp reporter fusion is expressed in the PVT, AIM, and ASI neurons, as well as in the vulva and weakly in the body wall muscle.
K08C7.2	-1.11578	0.461443	0.0020225	0.106011	fmo-1	fmo-1 encodes a flavin-containing monoxygenase homologous to human FMO1, FMO2, and FMO3 (OMIM:602079, mutated in trimethylaminuria).
B0273.1	-1.12299	0.459141	0.0186781	0.356545	B0273.1	N.A.
T16A9.3	-1.12301	0.459135	0.00584729	0.200143	T16A9.3	N.A.
F09B9.1	-1.14511	0.452156	0.00292839	0.131641	oac-14	N.A.
C55A6.7	-1.15694	0.448464	0.0332015	0.483015	C55A6.7	N.A.
T19H5.1	-1.1577	0.448228	0.01506	0.320853	chil-25	N.A.
F55B11.5	-1.1579	0.448165	0.0156509	0.327776	F55B11.5	N.A.
W06D4.2	-1.16755	0.445178	0.024111	0.410557	spe-46	N.A.
C09G9.7	-1.16761	0.445159	0.00845628	0.239583	npax-4	npax-4 is a divergent Paired domain-only protein\; it encodes only the first part of the Paired domain (the PAI subdomain) and an EH1 (octapeptide) motif\; the Paired domain is a DNA-binding domain\; the PAI subdomain is likely also DNA-binding\; npax genes mostly diverged from complete Paired domain-only and\/or Paired homeobox genes\; no obvious orthologs are present in arthropods or vertebrate…
C15C6.2	-1.1689	0.444761	0.0239874	0.410525	C15C6.2	N.A.
T02G5.11	-1.17229	0.443717	0.000128776	0.0272559	T02G5.11	N.A.
D1046.4	-1.17585	0.442621	0.00787381	0.228507	D1046.4	N.A.
R155.2	-1.17759	0.442089	0.0392985	0.522662	moa-1	N.A.
R09D1.10	-1.18891	0.438635	0.00675384	0.215107	chil-22	N.A.
ZK1058.6	-1.19706	0.436163	0.00257767	0.12095	nit-1	N.A.
T21E8.3	-1.20664	0.433276	0.0471965	0.570205	pgp-8	pgp-8 encodes an ATP-binding protein that is a member of the P-glycoprotein subclass of the ATP-binding cassette (ABC) transporter superfamily\; PGP-8 is predicted to function as a transmembrane protein that couples energy to transport of various molecules across membranes, but as loss of pgp-8 activity via RNAi results in no obvious defects, the precise role of PGP-8 in C. elegans development an…
C25H3.10	-1.21146	0.431833	0.000361683	0.0430944	C25H3.10	N.A.
Y32B12C.5	-1.21471	0.430861	0.0028571	0.128866	Y32B12C.5	N.A.
C34F11.5	-1.221	0.428986	0.0417431	0.538191	C34F11.5	N.A.
C01G12.8	-1.23616	0.4245	0.0231331	0.401797	catp-4	N.A.
F47B8.11	-1.243	0.422493	0.0184864	0.355139	sss-2	N.A.
C40A11.1	-1.24322	0.422429	0.0217853	0.387594	math-18	N.A.
C27D6.11	-1.24982	0.420501	0.0387153	0.520035	C27D6.11	N.A.
Y6G8.2	-1.25749	0.418272	0.038931	0.520809	Y6G8.2	N.A.
F11D5.7	-1.25968	0.417637	0.00977877	0.256071	F11D5.7	N.A.
F32B6.4	-1.26032	0.417451	0.043716	0.550511	F32B6.4	N.A.
C03A7.11	-1.26036	0.41744	0.000516777	0.0520699	ugt-51	N.A.
R04B5.3	-1.268	0.415234	0.0418376	0.53838	nhr-205	N.A.
C05B5.2	-1.26833	0.415139	0.0299472	0.461322	C05B5.2	N.A.
F53F1.6	-1.27267	0.413894	0.0175836	0.348213	F53F1.6	N.A.
K06A5.2	-1.27306	0.413782	0.00779412	0.228368	K06A5.2	N.A.
F25D1.5	-1.27434	0.413415	5.16382e-06	0.00270458	F25D1.5	N.A.
Y48G1C.5	-1.28108	0.411487	0.0186614	0.356545	Y48G1C.5	N.A.
W03F11.4	-1.29923	0.406344	0.0176624	0.348737	W03F11.4	N.A.
W02B12.12	-1.31333	0.40239	0.0245893	0.412244	W02B12.12	N.A.
K09F6.3	-1.31794	0.401107	0.0291942	0.456744	K09F6.3	N.A.
ZK550.5	-1.33191	0.397241	0.0146395	0.316392	ZK550.5	N.A.
C33F10.12	-1.33296	0.396952	0.0395981	0.52328	C33F10.12	N.A.
F55H12.5	-1.33401	0.396663	0.0295911	0.459224	F55H12.5	N.A.
C33F10.11	-1.33897	0.395303	0.0131806	0.29925	C33F10.11	N.A.
F37A4.4	-1.35226	0.391679	0.00760378	0.227448	F37A4.4	N.A.
ZK1251.1	-1.36457	0.388351	0.0152338	0.322516	htas-1	N.A.
W02A2.8	-1.36493	0.388253	0.0289224	0.4546	W02A2.8	N.A.
F53B6.4	-1.36545	0.388113	0.00449728	0.170846	F53B6.4	N.A.
F36A2.10	-1.37832	0.384666	0.00945089	0.252573	F36A2.10	N.A.
ZC116.2	-1.39543	0.380131	0.037729	0.513953	cyc-2.2	cyc-2.2 encodes, along with cyc-2.1, one of two C. elegans cytochrome c proteins\; the product of cyc-2.2 is predicted to function in the electron transport chain by transferring electrons from respiratory chain Complex III to Complex IV\; RNAi screens indicate the cyc-2.2 activity is required for embryonic development as well as for normal body size and rates of growth.
C17H12.5	-1.40269	0.378223	0.0396095	0.52328	C17H12.5	N.A.
K04G2.4	-1.41239	0.375688	0.0298007	0.460357	K04G2.4	N.A.
F58A6.9	-1.42068	0.373537	0.0200128	0.364719	F58A6.9	N.A.
C06A8.6	-1.42583	0.372205	0.0380856	0.515037	C06A8.6	N.A.
F20H11.4	-1.42646	0.372044	0.00838483	0.239065	F20H11.4	N.A.
Y37E11B.10	-1.43782	0.369124	0.0142441	0.315429	Y37E11B.10	N.A.
F26B1.8	-1.43995	0.36858	0.00148246	0.0940193	F26B1.8	N.A.
ZK816.5	-1.4402	0.368517	0.0016251	0.0978396	dhs-26	dhs-26 encodes a short-chain dehydrogenase predicted to be mitochondrial.
T08B6.4	-1.44119	0.368264	0.0124662	0.289362	T08B6.4	N.A.
F19C7.4	-1.44141	0.368207	0.0182124	0.352891	F19C7.4	N.A.
T05A7.6	-1.4418	0.368108	0.0365302	0.50736	T05A7.6	N.A.
C34D4.3	-1.44269	0.36788	0.0143725	0.315545	C34D4.3	N.A.
F58A6.8	-1.44573	0.367107	0.0116008	0.282397	msp-45	msp-45 encodes a member of the major sperm protein family.
C25G4.6	-1.46665	0.361821	0.00131136	0.0888696	smz-1	smz-1 encodes a PDZ domain-containing protein\; SMZ-1 activity is required for spermatocytes to progress through meiotic divisions, and specifically for meiotic chromosome segregation\; SMZ-1 localizes to spermatogenic meiotic chromosomes and mature sperm chromatin.
Y25C1A.1	-1.47704	0.359226	0.0255154	0.422209	clec-123	N.A.
C10G11.8	-1.47743	0.359128	0.00038144	0.0432277	C10G11.8	N.A.
F57B1.9	-1.48125	0.358178	0.00269738	0.124153	F57B1.9	N.A.
T27C10.8	-1.48609	0.356978	0.0369032	0.508939	T27C10.8	N.A.
F40G12.10	-1.48786	0.356542	0.0177911	0.348737	F40G12.10	N.A.
F21H7.5	-1.48872	0.356328	0.000660268	0.0581986	F21H7.5	N.A.
Y106G6H.13	-1.48961	0.356109	0.000332964	0.0415773	Y106G6H.13	N.A.
ZK265.3	-1.4934	0.355174	0.00354215	0.147436	ZK265.3	N.A.
C35D10.2	-1.49459	0.354883	0.000157609	0.0286845	gipc-1	N.A.
C09B9.4	-1.50148	0.353192	0.0190909	0.358912	C09B9.4	N.A.
F49E11.10	-1.51184	0.350664	0.000622132	0.0563092	scl-2	scl-2 encodes a predicted extracellular protein that is a member of the C. elegans family of SCP\/TAPS (sperm coating protein\/Tpx-1\/Ag5\/PR-1\/Sc7) domain-containing proteins\; an scl-2 deletion mutation, tm2428, is reported to be homozygous viable.
F36A2.14	-1.51188	0.350655	0.0140306	0.313273	F36A2.14	N.A.
C04G2.8	-1.51454	0.350007	0.0152762	0.322907	spch-1	spch-1 encodes one of three C. elegans small, highly basic proteins that have similarity to mouse testis-specific histone H1, the human nucleotide binding and splicing-associated protein SON, and the mollusk protamine-like SNBPs (sperm nuclear basic proteins)\; spch-1(RNAi) has been reported to result in low penetrance male meiosis defects\; SPCH-1 associates specifically with spermatogenic meiot…
R07B7.15	-1.51989	0.348712	0.0406323	0.530976	nhr-208	N.A.
T23G11.1	-1.52	0.348686	0.00232284	0.115543	T23G11.1	N.A.
Y69A2AR.19	-1.52014	0.348653	0.0157438	0.328671	Y69A2AR.19	N.A.
F54D1.1	-1.52502	0.347474	0.0162151	0.332335	F54D1.1	N.A.
F46F5.6	-1.52559	0.347337	0.0326382	0.479491	msrp-3	N.A.
F52H3.6	-1.52637	0.347151	0.0099202	0.257772	F52H3.6	N.A.
Y57G7A.6	-1.52665	0.347083	0.00108304	0.0768731	Y57G7A.6	N.A.
B0261.6	-1.53293	0.345575	0.00613195	0.204692	B0261.6	N.A.
ZK858.8	-1.534	0.345319	0.0143397	0.315545	ZK858.8	N.A.
T08B2.12	-1.53807	0.344347	0.0178657	0.349691	T08B2.12	N.A.
R10E9.2	-1.53846	0.344252	0.000542318	0.0520699	R10E9.2	N.A.
F29C4.4	-1.53961	0.34398	0.0466311	0.566213	F29C4.4	N.A.
F08H9.5	-1.54482	0.342738	0.018824	0.356545	clec-227	N.A.
C33F10.1	-1.54508	0.342676	0.00489907	0.180121	C33F10.1	N.A.
ZK1248.6	-1.5535	0.340683	0.00758381	0.227448	msp-64	msp-64 encodes a protein that belongs to a family of proteins called the Major Sperm Proteins (MSPs) that is conserved in nematodes\; this family consists of closely related, small, basic proteins that make up 15\% of sperm protein\; this multigene family consists of over fifty genes, including many pseudogenes\; MSPs are involved in both extracellular signaling and cytoskeletal functions during …
F57H12.5	-1.56515	0.337942	0.015116	0.321537	F57H12.5	N.A.
T22C1.8	-1.56644	0.33764	0.00881534	0.243614	T22C1.8	N.A.
W01C9.4	-1.56729	0.337441	0.0272946	0.437486	decr-1.2	N.A.
Y46G5A.30	-1.56766	0.337355	0.00512174	0.185677	snf-5	N.A.
R09E10.1	-1.56882	0.337085	0.0216402	0.386032	R09E10.1	N.A.
T27E7.1	-1.595	0.331022	0.0100957	0.259334	T27E7.1	N.A.
W03D8.9	-1.59777	0.330388	0.00198909	0.10561	W03D8.9	N.A.
Y59E9AL.3	-1.60255	0.329294	0.00177122	0.100787	Y59E9AL.3	N.A.
ZK945.7	-1.6039	0.328987	0.000355056	0.0430944	ZK945.7	N.A.
C14A6.13	-1.60508	0.328716	0.0397021	0.52328	C14A6.13	N.A.
R148.7	-1.60876	0.327879	0.0169742	0.343058	R148.7	N.A.
W02B12.7	-1.61252	0.327026	0.0311504	0.470351	klp-17	klp-17 encodes a C-terminal kinesin motor protein orthologous to Drosophila NCD and Saccharomyces cerevisiae KAR3\; by homology, KLP-17 is predicted to function as a minus-end directed motor\; loss of klp-17 activity via RNAi results in embryonic lethality generally at the one- or two-cell stage with disorganized mitotic spindles and polyploid nuclei, suggesting that KLP-17 plays a role in chromo…
C14C10.1	-1.61558	0.326334	0.00556621	0.192295	C14C10.1	N.A.
T03F1.5	-1.61578	0.326289	0.00192011	0.104414	gsp-4	gsp-4 encodes an ortholog of protein phosphatase 1 gamma, a Glc7\/PP1 phosphatase (HGNC:PPP1CA)\; GSP-4 is nearly identical to GSP-3, and the two proteins appear to function redundantly during sperm development\; GSP-3\/4 activity is required for chromosome partitioning during sperm meiosis and for sperm motility, specifically for pseudopod development and a normal rate of pseudopodial treadmilli…
R07E5.15	-1.61872	0.325624	0.0231772	0.401797	R07E5.15	N.A.
F41H10.2	-1.62234	0.324809	0.000376448	0.0432277	F41H10.2	N.A.
F07F6.1	-1.62898	0.323316	0.0391203	0.521321	F07F6.1	N.A.
Y106G6A.4	-1.6336	0.322283	0.044991	0.558674	Y106G6A.4	N.A.
F44D12.4	-1.63383	0.322232	0.000173754	0.0296614	gipc-2	N.A.
C17H12.3	-1.63663	0.321608	0.0122018	0.287293	C17H12.3	N.A.
Y44A6D.5	-1.63763	0.321384	0.0415563	0.537323	Y44A6D.5	N.A.
F41G3.5	-1.63968	0.320928	0.0249429	0.415798	F41G3.5	N.A.
R11G11.14	-1.6398	0.320902	0.0442349	0.552363	lipl-3	N.A.
C18H7.4	-1.64381	0.320009	0.0246686	0.412244	C18H7.4	N.A.
Y106G6G.4	-1.64721	0.319257	0.00233039	0.115543	Y106G6G.4	N.A.
H05L14.1	-1.64748	0.319198	0.0157955	0.329234	H05L14.1	N.A.
F36A4.4	-1.64975	0.318695	0.0258692	0.426493	F36A4.4	N.A.
C17G10.3	-1.65119	0.318378	0.0251048	0.417464	C17G10.3	N.A.
ZK1225.6	-1.66694	0.31492	0.0437056	0.550511	ssp-31	N.A.
C28D4.7	-1.66851	0.314578	0.0172945	0.345019	C28D4.7	N.A.
C27D6.3	-1.67169	0.313885	0.0492718	0.582876	C27D6.3	N.A.
H27M09.5	-1.67986	0.312113	0.0370717	0.509631	H27M09.5	N.A.
C48E7.7	-1.6925	0.309391	0.00522511	0.187909	C48E7.7	N.A.
K05F1.3	-1.69262	0.309364	0.00544272	0.191147	acdh-8	N.A.
M70.3	-1.6927	0.309347	0.00982609	0.256315	M70.3	N.A.
T13H10.1	-1.69387	0.309096	0.017214	0.344433	kin-5	kin-5 encodes a predicted protein tyrosine kinase that is most closely related to the non-receptor tyrosine kinases Fes\/Fps and Fer that contain an SH2 domain and a tyrosine kinase domain (OMIM:190030, murine Fes appears to be required for hemopoietic homeostasis)\; as loss of kin-5 activity via large-scale RNAi screens does not result in any obvious abnormalities, the precise role of kin-5 in C…
R05F9.8	-1.69413	0.309041	0.000461417	0.0497814	msp-33	msp-33 encodes a protein that belongs to a family of proteins called the Major Sperm Proteins (MSPs) that is conserved in nematodes\; msp-33 has a C. briggsae homolog as predicted by the Wobble Aware Bulk Aligner (WABA)\; the MSP family consists of closely related, small, basic proteins that make up 15\% of sperm protein\; this multigene family consists of over fifty genes, including many pseudog…
K09C4.1	-1.69526	0.308799	0.00245243	0.118969	K09C4.1	N.A.
T22B3.2	-1.69752	0.308316	0.00232823	0.115543	alg-3	alg-3 encodes an Argonaute (AGO) protein that is a member of the AGO clade of Argonaute small RNA-binding proteins\; together with its paralog, alg-4, alg-3 is required for normal brood sizes at elevated temperatures, specifically for the process of spermiogenesis in which spermatids are converted to mobile ameboid sperm\; alg-3\/4 is also required for accumulation of male germline-specific 26G-R…
Y106G6D.3	-1.69936	0.307924	0.000191213	0.0318177	Y106G6D.3	N.A.
F27C8.5	-1.70234	0.307286	0.0223577	0.394139	pei-1	N.A.
C10G11.9	-1.70278	0.307193	0.0114075	0.279889	spch-2	spch-2 encodes one of three C. elegans small, highly basic proteins that have similarity to mouse testis-specific histone H1, the human nucleotide-binding and splicing-associated protein SON, and the mollusk protamine-like SNBPs (sperm nuclear basic proteins)\; SPCH-2 associates specifically with spermatogenic meiotic and mature sperm chromatin.
C03C11.1	-1.70338	0.307066	0.0398753	0.52399	C03C11.1	N.A.
T25B9.6	-1.70841	0.305997	0.00690823	0.217674	T25B9.6	N.A.
F02E9.3	-1.71004	0.305652	0.00252387	0.119848	F02E9.3	N.A.
C50F4.2	-1.71391	0.304832	0.0399034	0.52399	pfk-1.2	pfk-1.2 encodes a 6-phosphofructokinase (E.C. 2.7.1.11), paralogous to PFK-1.1\; pfk-1.2 is required for fertility, full body size, and normally rapid growth in mass RNAi assays\; pfk-1.2 transcripts are enriched during spermatogenesis.
ZC317.6	-1.71767	0.30404	0.00255869	0.120657	ZC317.6	N.A.
T03F6.6	-1.72044	0.303456	0.000680502	0.059208	T03F6.6	N.A.
ZK484.5	-1.72288	0.302944	0.000520194	0.0520699	msrp-2	N.A.
F56A4.2	-1.72407	0.302694	0.0109201	0.273226	F56A4.2	N.A.
K09E4.1	-1.72673	0.302136	0.00534062	0.18976	K09E4.1	N.A.
F26G1.7	-1.73102	0.301238	0.00851106	0.240126	msp-3	msp-3 encodes a protein that belongs to a family of proteins called the Major Sperm Proteins (MSPs) that is conserved in nematodes\; msp-3 is similar in nucleotide sequence to the msp genes from the nematode Onchocerca volvulus\; the msp gene family consists of closely related, small, basic proteins that make up 15\% of sperm protein\; this multigene family consists of over fifty genes, including…
F10E9.1	-1.73532	0.300342	0.0373145	1	F10E9.1	N.A.
F17C8.7	-1.73652	0.300093	0.0429447	0.547242	F17C8.7	N.A.
ZK354.5	-1.73678	0.300038	0.00086877	0.0663856	msp-51	msp-51 encodes a protein that belongs to a family of proteins called the Major Sperm Proteins (MSPs) that is conserved in nematodes\; msp-51 has a C. briggsae homolog as predicted by the Wobble Aware Bulk Aligner (WABA)\; the MSP family consists of closely related, small, basic proteins that make up 15\% of sperm protein\; this multigene family consists of over fifty genes, including many pseudog…
ZK637.12	-1.74104	0.299154	0.0181585	0.352354	ZK637.12	N.A.
F18A12.4	-1.74862	0.297586	0.0341142	0.48943	nep-8	F18A12.4 encodes a neprilysin\; neprilysins are thermolysin-like zinc metallopeptidases, found on the outer surface of animal cells, that negatively regulate small signalling peptides (e.g., enkephalin, tachykinin, insulin, and natriuretic peptides) by cleaving them\; F18A12.4 has no clear orthologs in other organisms.
W01B6.2	-1.74928	0.297451	0.00928262	0.25239	ttbk-4	N.A.
F10D7.4	-1.75682	0.295901	0.0482803	1	F10D7.4	N.A.
T21G5.4	-1.75982	0.295286	0.000262	0.0384058	smz-2	smz-2 encodes a PDZ domain-containing protein\; SMZ-2 activity is required for spermatocytes to progress through meiotic divisions, and specifically for meiotic chromosome segregation\; SMZ-2 localizes to spermatogenic meiotic chromosomes and mature sperm chromatin.
ZC477.7	-1.7614	0.294962	0.0164094	0.3353	ZC477.7	N.A.
F34H10.5	-1.76195	0.29485	0.0487025	1	F34H10.5	N.A.
BE10.1	-1.76631	0.293959	0.0451721	1	BE10.1	N.A.
R13A1.9	-1.7677	0.293676	0.0330053	0.48068	best-16	N.A.
C17H12.12	-1.77161	0.292881	0.000702788	0.0601358	C17H12.12	N.A.
M70.1	-1.77389	0.29242	0.0317328	0.474971	M70.1	N.A.
B0491.3	-1.77435	0.292327	0.000525759	0.0520699	rmd-3	N.A.
ZK1053.2	-1.77606	0.29198	0.0085077	0.240126	ZK1053.2	N.A.
T13F2.11	-1.77633	0.291925	0.00247375	0.119147	msp-78	msp-78 encodes a protein that belongs to a family of proteins called the Major Sperm Proteins (MSPs) that is conserved in nematodes\; this family consists of closely related, small, basic proteins that make up 15\% of sperm protein\; this multigene family consists of over fifty genes, including many pseudogenes\; MSPs are involved in both extracellular signaling and cytoskeletal functions during …
B0205.10	-1.77849	0.291488	0.00249884	0.119501	B0205.10	N.A.
C34F11.2	-1.78424	0.290329	0.0221934	0.391754	C34F11.2	N.A.
ZK757.3	-1.78931	0.289311	0.00208212	0.107872	alg-4	alg-4 encodes an Argonaute (AGO) protein that is a member of the AGO clade of Argonaute small RNA-binding proteins\; together with its paralog, alg-3, alg-4 is required for normal brood sizes at elevated temperatures, specifically for the process of spermiogenesis in which spermatids are converted to mobile ameboid sperm\; alg-3\/4 is also required for accumulation of male germline-specific 26G-R…
T28H11.7	-1.79101	0.288969	0.00432795	0.166094	T28H11.7	N.A.
ZC168.6	-1.79119	0.288934	0.0362653	0.505602	ssp-34	N.A.
K07F5.2	-1.79435	0.288301	0.00123989	0.0848791	msp-10	msp-10 encodes a protein that belongs to a family of proteins called the Major Sperm Proteins (MSPs) that is conserved in nematodes\; this family consists of closely related, small, basic proteins that make up 15\% of sperm protein\; this multigene family consists of over fifty genes, including many pseudogenes\; MSPs are involved in both extracellular signaling and cytoskeletal functions during …
F20D6.6	-1.79451	0.288269	0.0122857	0.287711	F20D6.6	N.A.
R13H9.4	-1.79575	0.288023	0.000302431	0.0395978	msp-53	msp-53 encodes a protein that belongs to a family of proteins called the Major Sperm Proteins (MSPs) that is conserved in nematodes\; msp-53 has a C. briggsae homolog as identified by the Wobble Aware Bulk Aligner (WABA)\; the MSP family consists of closely related, small, basic proteins that make up 15\% of sperm protein\; this multigene family consists of over fifty genes, including many pseudo…
F14E5.3	-1.79575	0.288021	0.0303091	0.46396	acp-3	N.A.
Y105C5B.18	-1.799	0.287374	0.0281136	0.444478	Y105C5B.18	N.A.
C33F10.9	-1.8012	0.286935	0.000165905	0.0286845	msp-40	msp-40 encodes a protein that belongs to a family of proteins called the Major Sperm Proteins (MSPs) that is conserved in nematodes\; this family consists of closely related, small, basic proteins that make up 15\% of sperm protein\; this multigene family consists of over fifty genes, including many pseudogenes\; MSPs are involved in both extracellular signaling and cytoskeletal functions during …
R10H10.2	-1.80261	0.286655	0.00741048	0.225085	spe-26	spe-26 encodes a Kelch motif-containing protein similar to the Drosophila proteins kelch and diablo and the Limulus (horseshoe crab) actin-bundling protein scruin\; SPE-26 activity is required for several processes including embryogenesis, spermatogenesis, thermotolerance, and regulation of lifespan\; SPE-26 mRNA is detected in spermatogonial cells and spermatocytes, but not in spermatids.
Y38C1AA.7	-1.80332	0.286513	0.000487874	0.0514021	Y38C1AA.7	N.A.
T10E9.4	-1.80354	0.28647	5.40736e-05	0.016959	T10E9.4	N.A.
Y37D8A.5	-1.81221	0.284755	0.0393862	0.522793	Y37D8A.5	N.A.
Y39B6A.30	-1.81482	0.284239	0.0133184	0.301363	Y39B6A.30	N.A.
C48E7.8	-1.81893	0.283431	0.0122066	0.287293	oac-9	N.A.
F37C12.18	-1.86104	0.275278	0.048684	0.579775	F37C12.18	N.A.
F17E9.5	-1.86472	0.274577	9.15658e-05	0.022695	F17E9.5	F17E9.5 encodes a novel protein conserved amongst nematodes.
F32B6.6	-1.8678	0.273992	5.03799e-06	0.00270458	msp-77	msp-77 encodes a protein that belongs to a family of proteins called the Major Sperm Proteins (MSPs) that is conserved in nematodes\; this family consists of closely related, small, basic proteins that make up 15\% of sperm protein\; this multigene family consists of over fifty genes, including many pseudogenes\; MSPs are involved in both extracellular signaling and cytoskeletal functions during …
T02E1.6	-1.8719	0.273214	0.0246032	0.412244	T02E1.6	N.A.
B0379.7	-1.87511	0.272607	0.00052068	0.0520699	B0379.7	N.A.
F10F2.7	-1.88565	0.270622	0.0148652	0.317706	clec-151	N.A.
F36D3.4	-1.88666	0.270433	5.57625e-05	0.0170912	F36D3.4	N.A.
ZK546.6	-1.88785	0.270209	0.00104043	0.0758448	msp-152	msp-152 encodes a protein that belongs to a family of proteins called the Major Sperm Proteins (MSPs) that is conserved in nematodes\; this family consists of closely related, small, basic proteins that make up 15\% of sperm protein\; this multigene family consists of over fifty genes, including many pseudogenes\; MSPs are involved in both extracellular signaling and cytoskeletal functions during…
R05F9.13	-1.88822	0.270139	0.000195823	0.0318177	msp-31	msp-31 encodes a member of the major sperm protein family\; msp-31 has a C. briggsae homolog as predicted by the Wobble Aware Bulk Aligner (WABA)\; expression is enriched in sperm.
T28H11.5	-1.88866	0.270058	0.0464135	0.565942	ssq-2	N.A.
W09C3.6	-1.8895	0.2699	0.000217236	0.0332914	gsp-3	gsp-3 encodes an ortholog of protein phosphatase 1 gamma, a Glc7\/PP1 phosphatase (HGNC:PPP1CA)\; GSP-3 is nearly identical to GSP-4, and the two proteins appear to function redundantly during sperm development\; GSP-3\/4 activity is required for chromosome partitioning during sperm meiosis and for sperm motility, specifically for pseudopod development and a normal rate of pseudopodial treadmilli…
F32B6.5	-1.89892	0.268143	0.000796756	0.0639586	sss-1	N.A.
D1086.17	-1.89966	0.268007	0.00166823	0.098691	D1086.17	N.A.
C04F12.7	-1.90189	0.267592	8.34093e-05	0.0212237	C04F12.7	N.A.
T16A9.5	-1.90586	0.266856	0.00171982	0.0999722	T16A9.5	N.A.
Y43F8A.2	-1.90739	0.266574	0.000538848	0.0520699	Y43F8A.2	N.A.
M162.7	-1.91132	0.265849	0.00763093	0.227448	M162.7	N.A.
C02F5.5	-1.91242	0.265647	0.00121524	0.0836158	C02F5.5	N.A.
K07F5.9	-1.91392	0.26537	0.000639622	0.0571254	ssp-10	N.A.
R09E10.6	-1.91394	0.265366	0.000305924	0.0396702	R09E10.6	R09E10.6 encodes a novel protein conserved amongst nematodes\; R09E10.6 expression is enriched in the germline and loss of R09E10.6 activity via RNAi results in germ cell abnormalities, including oogenesis defects and abnormal syncytial germ cell compartments, that lead to reduced fertility.
F02E11.1	-1.9142	0.265318	0.0267188	0.435496	wht-4	N.A.
Y46G5A.14	-1.9156	0.265062	0.0153567	0.32309	Y46G5A.14	N.A.
C04G2.9	-1.92105	0.264061	0.000164497	0.0286845	C04G2.9	N.A.
W09D6.4	-1.92539	0.26327	0.00514263	0.185934	W09D6.4	N.A.
K07F5.3	-1.92696	0.262984	0.000546871	0.0520699	msp-56	msp-56 encodes a protein that belongs to a family of proteins called the Major Sperm Proteins (MSPs) that is conserved in nematodes\; this family consists of closely related, small, basic proteins that make up 15\% of sperm protein\; this multigene family consists of over fifty genes, including many pseudogenes\; MSPs are involved in both extracellular signaling and cytoskeletal functions during …
B0218.7	-1.93225	0.26202	0.0036849	0.149376	B0218.7	N.A.
T27A3.4	-1.93428	0.261652	0.00613108	0.204692	spch-3	spch-3 encodes one of three C. elegans small, highly basic proteins that have similarity to mouse testis-specific histone H1, the human nucleotide binding and splicing-associated protein SON, and the mollusk protamine-like SNBPs (sperm nuclear basic proteins)\; SPCH-3 associates specifically with spermatogenic meiotic and mature sperm chromatin.
F47B3.7	-1.93582	0.261372	0.00642516	0.211341	F47B3.7	N.A.
F21D9.2	-1.93619	0.261306	0.0299658	0.461322	F21D9.2	N.A.
F13D2.3	-1.93685	0.261187	0.0308259	1	gnrr-7	N.A.
F55C5.1	-1.94553	0.25962	0.000809202	0.0642354	ssp-35	N.A.
C34F11.6	-1.9515	0.258548	0.00171158	0.0999236	msp-49	msp-49 encodes a protein that belongs to a family of proteins called the Major Sperm Proteins (MSPs) that is conserved in nematodes\; this family consists of closely related, small, basic proteins that make up 15\% of sperm protein\; this multigene family consists of over fifty genes, including many pseudogenes\; MSPs are involved in both extracellular signaling and cytoskeletal functions during …
F49C12.15	-1.95315	0.258251	0.000114397	0.0257862	F49C12.15	N.A.
Y43F8C.5	-1.95692	0.257577	0.0078959	0.228507	Y43F8C.5	N.A.
ZK354.7	-1.96564	0.256025	0.00815517	0.234001	ZK354.7	N.A.
F40H6.1	-1.9665	0.255873	0.0292777	0.457519	F40H6.1	N.A.
R09E10.3	-1.96672	0.255833	0.00557522	0.192295	acs-18	N.A.
F56F3.4	-1.96838	0.25554	0.00359076	0.148089	F56F3.4	N.A.
ZK354.4	-1.96912	0.255409	0.00159259	0.096746	msp-113	msp-113 encodes a protein that belongs to a family of proteins called the Major Sperm Proteins (MSPs) that is conserved in nematodes\; msp-113 has a C. briggsae homolog as detected by the Wobble Aware Bulk Aligner (WABA)\; the MSP family consists of closely related, small, basic proteins that make up 15\% of sperm protein\; this multigene family consists of over fifty genes, including many pseudo…
T05F1.5	-1.96998	0.255257	0.000344921	0.0426753	T05F1.5	N.A.
C27D8.1	-1.97313	0.254699	0.00357567	0.147929	C27D8.1	N.A.
ZK1251.6	-1.97561	0.254262	3.62936e-06	0.0022248	msp-76	msp-76 encodes a protein that belongs to a family of proteins called the Major Sperm Proteins (MSPs) that is conserved in nematodes\; this family consists of closely related, small, basic proteins that make up 15\% of sperm protein\; this multigene family consists of over fifty genes, including many pseudogenes\; MSPs are involved in both extracellular signaling and cytoskeletal functions during …
F02C9.4	-1.97763	0.253906	0.0138039	0.310265	irld-3	N.A.
F27C1.1	-1.98196	0.253145	0.00013541	0.0272559	F27C1.1	N.A.
Y59E9AL.6	-1.98329	0.252913	0.00198666	0.10561	cylc-1	N.A.
T28B8.4	-1.99238	0.251323	0.0091725	0.250405	T28B8.4	N.A.
F57F4.1	-1.99283	0.251246	0.000456436	0.0496411	F57F4.1	N.A.
Y76A2A.1	-1.99447	0.250961	0.00178959	0.100981	tag-164	N.A.
F42A9.7	-1.99752	0.250429	0.0119858	0.285583	F42A9.7	N.A.
F46B6.8	-2.0024	0.249585	0.00857918	0.240538	lipl-2	N.A.
C37A2.3	-2.00389	0.249327	0.00773709	0.228368	acdh-5	N.A.
C15H7.3	-2.00532	0.24908	0.0338942	0.488833	C15H7.3	N.A.
K04H4.5	-2.00574	0.249006	0.000201518	0.0319372	K04H4.5	N.A.
Y69E1A.2	-2.01296	0.247765	0.000538068	0.0520699	Y69E1A.2	N.A.
ZK1307.4	-2.01337	0.247693	0.000506029	0.0520699	ZK1307.4	N.A.
T13F2.10	-2.01596	0.247249	9.42399e-05	0.022695	msp-79	msp-79 encodes a member of the major sperm protein family.
ZK938.1	-2.02108	0.246373	1.97246e-05	0.00886685	ZK938.1	N.A.
ZK596.2	-2.023	0.246046	0.0142372	0.315429	ZK596.2	N.A.
C45G9.9	-2.02432	0.245821	0.000827252	0.0642354	C45G9.9	N.A.
F01D4.1	-2.02463	0.245768	0.0124229	1	ugt-43	N.A.
C04G2.4	-2.03036	0.244794	0.000107058	0.0248929	msp-36	msp-36 encodes a protein that belongs to a family of proteins called the Major Sperm Proteins (MSPs) that is conserved in nematodes\; this family comprises of closely related, small, basic proteins that make up 15\% of sperm protein\; this multigene family consists of over fifty genes, including many pseudogenes\; MSP is involved in both extracellular signaling and cytoskeletal functions during r…
B0252.5	-2.04178	0.242864	0.00357593	0.147929	B0252.5	N.A.
ZK892.3	-2.06035	0.239758	0.0255105	1	ZK892.3	N.A.
E03H12.5	-2.06298	0.239321	0.00139397	0.0913738	E03H12.5	N.A.
T22B3.3	-2.06437	0.239091	0.00151386	0.0949576	T22B3.3	N.A.
ZK354.11	-2.07399	0.237501	2.82863e-05	0.0108991	msp-59	msp-59 encodes a member of the major sperm protein family.
ZK402.5	-2.07677	0.237045	0.0425187	1	ZK402.5	N.A.
C35D10.11	-2.07806	0.236832	0.00148043	0.0940193	msd-4	N.A.
F52F12.5	-2.07921	0.236644	0.0472963	0.570205	F52F12.5	N.A.
C34F11.4	-2.08241	0.23612	0.000452538	0.0496411	msp-50	msp-50 encodes a protein that belongs to a family of proteins called the Major Sperm Proteins (MSPs) that is conserved in nematodes\; this family consists of closely related, small, basic proteins that make up 15\% of sperm protein\; this multigene family consists of over fifty genes, including many pseudogenes\; MSPs are involved in both extracellular signaling and cytoskeletal functions during …
F44F1.3	-2.08657	0.235439	0.0346998	0.494813	clp-8	N.A.
D1081.12	-2.0906	0.234783	0.0199102	1	D1081.12	N.A.
F13A7.1	-2.09304	0.234386	0.0112344	0.278506	F13A7.1	N.A.
Y69E1A.3	-2.09346	0.234318	0.0398033	1	Y69E1A.3	N.A.
K03H1.1	-2.09803	0.233577	0.000133594	0.0272559	gln-2	N.A.
D2030.7	-2.10008	0.233246	3.005e-12	5.06567e-09	D2030.7	N.A.
F42C5.5	-2.10208	0.232922	0.00736222	0.224631	F42C5.5	N.A.
F36H12.7	-2.10492	0.232464	0.0254654	0.4219	msp-19	msp-19 encodes a protein that belongs to a family of proteins called the Major Sperm Proteins (MSPs) that is conserved in nematodes\; msp-19 has a homolog in C. briggsae as predicted by the Wobble Aware Bulk Aligner (WABA)\; the msp gene family consists of closely related, small, basic proteins that make up 15\% of sperm protein\; this multigene family consists of over fifty genes, including many…
E03H12.7	-2.11781	0.230397	0.018804	0.356545	E03H12.7	N.A.
K07F5.1	-2.11954	0.23012	1.91274e-06	0.00128976	msp-81	msp-81 encodes a member of the major sperm protein family.
Y69E1A.1	-2.1251	0.229236	0.000177679	0.0299523	Y69E1A.1	N.A.
K08F4.8	-2.13113	0.228279	0.00147834	0.0940193	msp-38	msp-38 encodes a member of the major sperm protein family\; msp-38 has a C. briggsae homolog as predicted by the Wobble Bulk Aware Bulk Aligner (WABA).
B0025.5	-2.13316	0.227959	0.000141183	0.0275941	B0025.5	N.A.
F33D11.7	-2.13334	0.227929	0.0158685	0.329234	F33D11.7	N.A.
K05F1.9	-2.13409	0.227811	0.0225723	0.395471	K05F1.9	N.A.
F18C5.4	-2.14329	0.226363	0.0107251	0.270818	mpz-3	N.A.
F40F9.3	-2.15624	0.22434	0.000991761	0.0730868	F40F9.3	N.A.
F47C12.4	-2.15897	0.223916	0.00227911	0.11431	clec-79	N.A.
K07A3.3	-2.18235	0.220316	0.0020466	0.106565	K07A3.3	N.A.
C28D4.5	-2.18533	0.219862	0.0125709	0.29129	C28D4.5	N.A.
M28.9	-2.19315	0.218673	0.000135382	0.0272559	M28.9	N.A.
F44D12.5	-2.19747	0.21802	1.06556e-05	0.00532227	msd-2	N.A.
C30B5.3	-2.19893	0.217799	0.038362	0.51735	cpb-2	cpb-2 encodes a cytoplasmic polyadenylation element binding (CPEB) protein homolog, expressed specifically in the spermatogenic germ line\; CPB-2 is dispensable for oogenesis, in contrast to CPEBs in vertebrates (Xenopus), arthropods (Drosophila), and molluscs (Spisula), which all participate in oogenesis.
Y34F4.6	-2.20152	0.217409	0.0286306	1	Y34F4.6	N.A.
C39H7.1	-2.22659	0.213664	7.34609e-07	0.000582761	C39H7.1	N.A.
F08H9.2	-2.244	0.211101	0.00076471	0.0639586	F08H9.2	N.A.
T27C10.7	-2.25595	0.209359	0.00526091	0.188693	nspd-10	N.A.
C55C3.4	-2.26005	0.208765	0.0123469	0.288081	C55C3.4	N.A.
F32H2.7	-2.26639	0.207849	2.04298e-05	0.00888763	F32H2.7	N.A.
C48B6.4	-2.28565	0.205093	0.000362119	0.0430944	C48B6.4	N.A.
F28H7.10	-2.28641	0.204984	0.0465881	1	ocr-1	ocr-1 encodes a transient receptor potential (TRP) channel\; an OCR-1::GFP reporter fusion is expressed in the amphid sensory neurons AWA and ADL.
C32E12.1	-2.29902	0.203202	0.00550776	0.191932	C32E12.1	N.A.
C43F9.6	-2.30102	0.20292	0.00490171	0.180121	nkb-2	N.A.
F11A5.12	-2.30566	0.202269	0.019916	1	stdh-2	stdh-2 encodes a putative steroid dehydrogenase required for normally short lifespan\; STDH-2 is orthologous to human HSD17B3 (OMIM:605573, mutated in pseudohermaphroditism), HSD17B12 (OMIM:609574), and HSDL1, and paralogous to LET-767, STDH-1, and STDH-3\/-4.
F54F7.9	-2.31285	0.201263	0.0301408	1	F54F7.9	N.A.
K06H7.8	-2.31498	0.200966	0.042677	1	K06H7.8	N.A.
R102.10	-2.31761	0.200599	0.0203126	0.368517	R102.10	N.A.
K01H12.4	-2.32122	0.200099	2.62619e-05	0.0107324	K01H12.4	N.A.
C09B9.6	-2.32454	0.199638	3.79577e-05	0.0124853	msp-55	msp-55 encodes a member of the major sperm protein family.
C50F4.10	-2.32707	0.199289	0.00169853	0.099593	C50F4.10	N.A.
T28H11.6	-2.33178	0.198638	0.0296251	0.459224	ssp-11	ssp-11 encodes a sperm-specific protein\; loss of ssp-11 activity via RNAi has been reported to result in moderately increased fat content.
Y57G11B.8	-2.34975	0.196179	0.0229029	1	Y57G11B.8	N.A.
W03F11.3	-2.35844	0.195002	0.0414271	1	dct-9	N.A.
E03A3.4	-2.35883	0.194949	0.0143248	1	his-70	his-70 encodes an H3 histone.
T04B2.7	-2.36217	0.194498	0.00457152	0.172954	T04B2.7	N.A.
Y60A3A.15	-2.39935	0.18955	0.018405	1	nhr-240	N.A.
F55B11.7	-2.40602	0.188675	0.0159729	1	F55B11.7	N.A.
T16G1.5	-2.42839	0.185773	0.0467397	1	T16G1.5	N.A.
F54C1.8	-2.44924	0.183107	0.0377959	1	F54C1.8	N.A.
F36A2.12	-2.45213	0.18274	0.00202809	0.106011	F36A2.12	N.A.
ZK354.1	-2.46042	0.181694	0.000203663	0.0319372	msp-65	msp-65 encodes a protein that belongs to a family of proteins called the Major Sperm Proteins (MSPs) that is conserved in nematodes\; this family consists of closely related, small, basic proteins that make up 15\% of sperm protein\; this multigene family consists of over fifty genes, including many pseudogenes\; MSPs are involved in both extracellular signaling and cytoskeletal functions during …
ZK892.5	-2.46745	0.18081	0.00530867	0.189399	ZK892.5	N.A.
R08A2.3	-2.47812	0.179478	0.00902119	0.24778	ssp-33	N.A.
T06A4.2	-2.56248	0.169285	0.0325586	1	mps-3	mps-3 encodes a single-pass transmembrane protein that is related to the vertebrate KCNE proteins, also known as MinK-related peptides (MiRPs) that associate with, and regulate, pore-forming ion channels\; mps-1 is required for the normal function of several neurons and thus for normal body touch sensation, chemotaxis to select molecules, osmotic avoidance, and nose-touch\; when coexpressed in ti…
C24D10.2	-2.57574	0.167735	0.0109405	0.273229	C24D10.2	N.A.
Y54G2A.13	-2.59452	0.165566	0.000117442	0.0257862	Y54G2A.13	N.A.
F59C6.3	-2.6149	0.163243	0.0449177	1	F59C6.3	N.A.
Y71G12B.22	-2.6198	0.162691	0.0170487	1	Y71G12B.22	N.A.
Y76G2A.1	-2.64019	0.160407	0.00379098	0.152612	not found
ZC477.1	-2.69137	0.154817	0.000145259	0.0279853	ssq-3	N.A.
AH6.3	-2.6981	0.154096	0.0417778	1	AH6.3	N.A.
M05B5.1	-2.75135	0.148512	0.000316237	0.0401046	M05B5.1	N.A.
K06A1.2	-2.77916	0.145677	0.0259266	1	K06A1.2	N.A.
Y116A8A.8	-2.79304	0.144282	0.041333	1	clec-194	N.A.
T24A6.17	-2.80545	0.143046	2.80622e-05	0.0108991	T24A6.17	N.A.
C15H11.1	-2.93963	0.130342	0.0144283	0.315545	C15H11.1	N.A.
C36B7.8	-2.94049	0.130264	0.0301439	1	not found
Y59E9AR.1	-2.94703	0.129674	0.0159729	0.330412	Y59E9AR.1	Y59E9AR.1 encodes a protein that contains a major sperm protein domain (MDP)\; the product of Y59E9AR.1 is present in sperm extracts.
C53D6.10	-2.96396	0.128162	0.00972921	0.255655	C53D6.10	N.A.
F36D3.5	-2.98987	0.125881	0.00161551	0.0976984	F36D3.5	N.A.
W01B6.6	-3.02834	0.122569	0.0174403	1	W01B6.6	N.A.
M02B1.4	-3.11157	0.115698	6.7277e-05	0.0185163	M02B1.4	N.A.
R13H9.1	-3.17803	0.110489	0.00024648	0.0372404	rmd-6	N.A.
T20F10.9	-3.18876	0.10967	0.0255841	1	T20F10.9	N.A.
ZK131.4	-3.22004	0.107317	0.0471553	1	his-10	his-10 encodes an H4 histone.
M110.7	-3.24755	0.105291	0.0106356	1	M110.7	N.A.
Y51B9A.5	-3.29878	0.101618	0.028838	1	Y51B9A.5	N.A.
R07E5.6	-3.44722	0.0916822	0.000362668	0.0430944	R07E5.6	N.A.
T21G5.1	-3.48178	0.0895114	0.000208416	0.0323069	T21G5.1	N.A.
T04F3.3	-3.48785	0.0891359	0.000278579	0.038808	T04F3.3	N.A.
Y57G11C.23	-3.52671	0.0867672	0.000785687	0.0639586	Y57G11C.23	N.A.
C06C6.7	-3.53695	0.0861532	0.0248556	1	C06C6.7	N.A.
Y59E9AL.2	-3.64137	0.0801377	0.000248527	0.0372404	Y59E9AL.2	N.A.
F56B3.15	-3.72379	0.0756878	0.0409531	1	F56B3.15	N.A.
C38C10.3	-3.75231	0.0742063	0.0118217	1	C38C10.3	N.A.
F36D1.3	-3.75875	0.0738759	0.0400418	1	sru-47	N.A.
Y44A6B.4	-3.77346	0.0731265	0.0360828	1	ttr-13	N.A.
Y37A1B.318	-3.82684	0.0704703	0.037948	1	21ur-6354	N.A.
ZK666.10	-3.8442	0.0696275	0.0349535	1	sri-8	N.A.
K05F1.7	-3.91638	0.0662297	0.0302041	1	msp-63	msp-63 encodes a protein that belongs to a family of proteins called the Major Sperm Proteins (MSPs) that is conserved in nematodes\; this family consists of closely related, small, basic proteins that make up 15\% of sperm protein\; this multigene family consists of over fifty genes, including many pseudogenes\; MSPs are involved in both extracellular signaling and cytoskeletal functions during …
ZK354.10	-3.93172	0.0655289	0.0384702	1	msp-58	msp-58 encodes a protein that belongs to a family of proteins called the Major Sperm Proteins (MSPs) that is conserved in nematodes\; this family consists of closely related, small, basic proteins that make up 15\% of sperm protein\; this multigene family consists of over fifty genes, including many pseudogenes\; MSPs are involved in both extracellular signaling and cytoskeletal functions during …
F28E10.5	-3.9559	0.0644399	0.0243741	1	F28E10.5	N.A.
F35H8.1	-4.25929	0.0522187	0.0307749	1	F35H8.1	N.A.
Y37E11AR.7	-4.53418	0.0431596	0.0256678	1	Y37E11AR.7	N.A.
F14E5.8	-4.59077	0.0414993	0.00410355	1	F14E5.8	N.A.
F37C4.2	-4.78468	0.03628	0.0144762	1	oac-22	N.A.
Y73F8A.12	-5.07307	0.0297067	0.0065838	1	Y73F8A.12	N.A.
F11G11.13	-5.15111	0.0281425	0.00432014	1	F11G11.13	N.A.
B0213.12	-5.47185	0.0225325	0.000964911	1	cyp-34A7	N.A.
F54H5.2	-5.5846	0.0208386	0.00114915	1	F54H5.2	N.A.
B0213.11	-6.14365	0.0141441	6.37124e-05	1	cyp-34A6	N.A.
B0213.10	-7.17333	0.00692808	1.21788e-07	0.000117317	cyp-34A5	N.A.
B0213.16	-8.19501	0.00341238	2.20759e-10	2.97716e-07	cyp-34A10	N.A.
K07C6.5	-9.45123	0.00142856	1.5095e-14	4.07143e-11	cyp-35A5	cyp-35A5 encodes one of over 80 C. elegans cytochrome P450s, NADPH-dependent monooxygenases that metabolize endogenous and exogenous compounds\; RT-PCR experiments indicate that cyp-35A5 mRNA is upregulated in response to treatment with xenobiotics, such as PCBs (polychlorinated biphenyls) or PAHs (polycyclic aromatic hydrocarbons)\; loss of cyp-35A\/C gene family activity in the presence of xeno…
T09H2.1	-9.49034	0.00139035	2.59051e-14	5.82259e-11	dach-1	N.A.
B0213.15	-10.4422	0.000718775	7.21414e-18	4.86449e-14	cyp-34A9	N.A.
B0213.14	-10.7826	0.000567689	5.96198e-19	8.04032e-15	cyp-34A8	N.A.

## Sheet: DAVID Molecular Factors
Category	Term	Count	%	PValue	Genes	List Total	Pop Hits	Pop Total	Fold Enrichment	Bonferroni	Benjamini	FDR
GOTERM_MF_DIRECT	GO:0000981~RNA polymerase II transcription factor activity, sequence-specific DNA binding	68	9.2517	3.82098e-30	WBGENE00000449, WBGENE00000448, WBGENE00022554, WBGENE00000440, WBGENE00022837, WBGENE00000443, WBGENE00001210, WBGENE00000445, WBGENE00006545, WBGENE00000521, WBGENE00009743, WBGENE00006873, WBGENE00006796, WBGENE00004013, WBGENE00004771, WBGENE00017755, WBGENE00013438, WBGENE00000437, WBGENE00000439, WBGENE00001960, WBGENE00001400, WBGENE00003102, WBGENE00000431, WBGENE00001249, WBGENE00006853,…	389	333	9934	5.21482	1.11573e-27	1.11573e-27	1.08134e-27
GOTERM_MF_DIRECT	GO:0000978~RNA polymerase II core promoter proximal region sequence-specific DNA binding	62	8.43537	1.05567e-24	WBGENE00000449, WBGENE00000448, WBGENE00022554, WBGENE00017046, WBGENE00000443, WBGENE00001210, WBGENE00000445, WBGENE00006545, WBGENE00009743, WBGENE00006873, WBGENE00006796, WBGENE00004013, WBGENE00004771, WBGENE00003681, WBGENE00017755, WBGENE00000437, WBGENE00000439, WBGENE00001960, WBGENE00001400, WBGENE00020748, WBGENE00003102, WBGENE00000431, WBGENE00001249, WBGENE00006853, WBGENE00003623,…	389	339	9934	4.67053	3.08257e-22	1.54128e-22	1.49378e-22
GOTERM_MF_DIRECT	GO:0042302~structural constituent of cuticle	35	4.7619	1.65847e-15	WBGENE00000603, WBGENE00000745, WBGENE00002827, WBGENE00000747, WBGENE00000683, WBGENE00005018, WBGENE00000641, WBGENE00005017, WBGENE00000685, WBGENE00000740, WBGENE00000720, WBGENE00000620, WBGENE00001065, WBGENE00009983, WBGENE00001064, WBGENE00000691, WBGENE00000658, WBGENE00000735, WBGENE00000734, WBGENE00000616, WBGENE00000615, WBGENE00000719, WBGENE00000718, WBGENE00001069, WBGENE00000650,…	389	170	9934	5.25767	4.86278e-13	1.61425e-13	1.56449e-13
GOTERM_MF_DIRECT	GO:0000977~RNA polymerase II regulatory region sequence-specific DNA binding	28	3.80952	1.39885e-13	WBGENE00000449, WBGENE00004949, WBGENE00001958, WBGENE00000440, WBGENE00001950, WBGENE00000220, WBGENE00000443, WBGENE00022837, WBGENE00003377, WBGENE00003933, WBGENE00000521, WBGENE00000469, WBGENE00000468, WBGENE00006652, WBGENE00001824, WBGENE00001948, WBGENE00001949, WBGENE00000451, WBGENE00004335, WBGENE00003102, WBGENE00006853, WBGENE00000433, WBGENE00006778, WBGENE00001204, WBGENE00000457,…	389	123	9934	5.81336	4.08473e-11	1.02116e-11	9.8969e-12
GOTERM_MF_DIRECT	GO:0003677~DNA binding	77	10.4762	4.78415e-11	WBGENE00001858, WBGENE00000449, WBGENE00000448, WBGENE00022554, WBGENE00001857, WBGENE00000440, WBGENE00022837, WBGENE00000443, WBGENE00000445, WBGENE00001898, WBGENE00006545, WBGENE00001854, WBGENE00000521, WBGENE00001976, WBGENE00001853, WBGENE00006873, WBGENE00006796, WBGENE00004013, WBGENE00004771, WBGENE00003681, WBGENE00000437, WBGENE00000439, WBGENE00001400, WBGENE00000476, WBGENE00020748,…	389	900	9934	2.18486	1.39697e-08	2.79394e-09	2.70783e-09
GOTERM_MF_DIRECT	GO:0003700~transcription factor activity, sequence-specific DNA binding	40	5.44218	1.7557e-06	WBGENE00013100, WBGENE00000463, WBGENE00000440, WBGENE00000220, WBGENE00000443, WBGENE00001210, WBGENE00006545, WBGENE00001434, WBGENE00000469, WBGENE00003018, WBGENE00002601, WBGENE00006652, WBGENE00003380, WBGENE00004013, WBGENE00003681, WBGENE00017535, WBGENE00017755, WBGENE00017814, WBGENE00000437, WBGENE00015395, WBGENE00020368, WBGENE00003847, WBGENE00001948, WBGENE00001400, WBGENE00000453,…	389	446	9934	2.29034	0.000512533	8.5444e-05	8.28104e-05
GOTERM_MF_DIRECT	GO:0097602~cullin family protein binding	8	1.08844	7.63127e-05	WBGENE00004827, WBGENE00004816, WBGENE00004815, WBGENE00016871, WBGENE00004819, WBGENE00004820, WBGENE00004814, WBGENE00004813	389	28	9934	7.29636	0.0220377	0.00318333	0.00308521
GOTERM_MF_DIRECT	GO:0043565~sequence-specific DNA binding	32	4.35374	0.000208597	WBGENE00001958, WBGENE00001950, WBGENE00000445, WBGENE00000521, WBGENE00004747, WBGENE00001434, WBGENE00003018, WBGENE00002601, WBGENE00000468, WBGENE00000272, WBGENE00004013, WBGENE00001086, WBGENE00003681, WBGENE00013438, WBGENE00000437, WBGENE00015395, WBGENE00020368, WBGENE00000439, WBGENE00019751, WBGENE00001949, WBGENE00001400, WBGENE00000476, WBGENE00020748, WBGENE00001249, WBGENE00006853,…	389	400	9934	2.04298	0.0590985	0.00761381	0.00737914
GOTERM_MF_DIRECT	GO:0046983~protein dimerization activity	10	1.36054	0.000623882	WBGENE00011327, WBGENE00001958, WBGENE00003595, WBGENE00001948, WBGENE00001949, WBGENE00001960, WBGENE00001950, WBGENE00013665, WBGENE00000521, WBGENE00003018	389	62	9934	4.11892	0.166591	0.0202415	0.0196176
GOTERM_MF_DIRECT	GO:0050839~cell adhesion molecule binding	5	0.680272	0.00167922	WBGENE00018215, WBGENE00020130, WBGENE00013683, WBGENE00007750, WBGENE00020160	389	14	9934	9.12046	0.387829	0.0447765	0.0433964
GOTERM_MF_DIRECT	GO:0031492~nucleosomal DNA binding	4	0.544218	0.00184013	WBGENE00001857, WBGENE00001854, WBGENE00001898, WBGENE00001853	389	7	9934	14.5927	0.415976	0.0447765	0.0433964
GOTERM_MF_DIRECT	GO:0070888~E-box binding	4	0.544218	0.00184013	WBGENE00003595, WBGENE00001960, WBGENE00013665, WBGENE00003018	389	7	9934	14.5927	0.415976	0.0447765	0.0433964
GOTERM_MF_DIRECT	GO:0005201~extracellular matrix structural constituent	6	0.816327	0.00852752	WBGENE00000603, WBGENE00000658, WBGENE00000652, WBGENE00000674, WBGENE00018304, WBGENE00007170	389	33	9934	4.64314	0.917974	0.191541	0.185638
GOTERM_MF_DIRECT	GO:0042329~structural constituent of collagen and cuticulin-based cuticle	4	0.544218	0.0126256	WBGENE00001072, WBGENE00001064, WBGENE00001069, WBGENE00000731	389	13	9934	7.85762	0.975526	0.263334	0.255217
GOTERM_MF_DIRECT	GO:0004867~serine-type endopeptidase inhibitor activity	8	1.08844	0.0234303	WBGENE00011328, WBGENE00012814, WBGENE00013849, WBGENE00007479, WBGENE00012186, WBGENE00020648, WBGENE00010738, WBGENE00020017	389	73	9934	2.79861	0.999015	0.45611	0.442052
GOTERM_MF_DIRECT	GO:0005518~collagen binding	3	0.408163	0.0280499	WBGENE00013531, WBGENE00018304, WBGENE00017381	389	7	9934	10.9445	0.999753	0.463486	0.4492
GOTERM_MF_DIRECT	GO:0048018~receptor agonist activity	3	0.408163	0.0280499	WBGENE00000858, WBGENE00001449, WBGENE00000857	389	7	9934	10.9445	0.999753	0.463486	0.4492
GOTERM_MF_DIRECT	GO:0005515~protein binding	59	8.02721	0.028571	WBGENE00010808, WBGENE00016871, WBGENE00001377, WBGENE00000440, WBGENE00000443, WBGENE00009939, WBGENE00006508, WBGENE00001898, WBGENE00000521, WBGENE00006476, WBGENE00012626, WBGENE00006796, WBGENE00009304, WBGENE00003243, WBGENE00008971, WBGENE00003681, WBGENE00018763, WBGENE00000870, WBGENE00004830, WBGENE00000431, WBGENE00006853, WBGENE00003623, WBGENE00001006, WBGENE00001131, WBGENE00007750,…	389	1163	9934	1.29553	0.999789	0.463486	0.4492
GOTERM_MF_DIRECT	GO:0003755~peptidyl-prolyl cis-trans isomerase activity	5	0.680272	0.0313442	WBGENE00001429, WBGENE00001432, WBGENE00001430, WBGENE00000882, WBGENE00000884	389	31	9934	4.11892	0.999908	0.48171	0.466863
GOTERM_MF_DIRECT	GO:0016853~isomerase activity	8	1.08844	0.0342516	WBGENE00001429, WBGENE00019154, WBGENE00015168, WBGENE00001432, WBGENE00015752, WBGENE00001430, WBGENE00000882, WBGENE00000884	389	79	9934	2.58605	0.999962	0.483748	0.468838
GOTERM_MF_DIRECT	GO:0008266~poly(U) RNA binding	3	0.408163	0.0364468	WBGENE00003903, WBGENE00001484, WBGENE00006331	389	8	9934	9.57648	0.99998	0.483748	0.468838
GOTERM_MF_DIRECT	GO:0043035~chromatin insulator sequence binding	3	0.408163	0.0364468	WBGENE00012317, WBGENE00003933, WBGENE00017814	389	8	9934	9.57648	0.99998	0.483748	0.468838
GOTERM_MF_DIRECT	GO:0005509~calcium ion binding	14	1.90476	0.0392266	WBGENE00022103, WBGENE00000396, WBGENE00000792, WBGENE00001475, WBGENE00022816, WBGENE00008779, WBGENE00019285, WBGENE00000401, WBGENE00019184, WBGENE00003772, WBGENE00017028, WBGENE00018304, WBGENE00013416, WBGENE00007170	389	193	9934	1.85244	0.999992	0.498007	0.482658
GOTERM_MF_DIRECT	GO:0017147~Wnt-protein binding	3	0.408163	0.04567	WBGENE00022242, WBGENE00003006, WBGENE00000478	389	9	9934	8.51243	0.999999	0.51291	0.497101
GOTERM_MF_DIRECT	GO:0005109~frizzled binding	3	0.408163	0.04567	WBGENE00000858, WBGENE00000857, WBGENE00001101	389	9	9934	8.51243	0.999999	0.51291	0.497101
GOTERM_MF_DIRECT	GO:0000987~core promoter proximal region sequence-specific DNA binding	3	0.408163	0.04567	WBGENE00003847, WBGENE00000463, WBGENE00000443	389	9	9934	8.51243	0.999999	0.51291	0.497101
GOTERM_MF_DIRECT	GO:0005102~receptor binding	7	0.952381	0.0650672	WBGENE00007531, WBGENE00000858, WBGENE00000857, WBGENE00002232, WBGENE00000262, WBGENE00002213, WBGENE00006746	389	73	9934	2.44878	1	0.691334	0.670026
GOTERM_MF_DIRECT	GO:0030971~receptor tyrosine kinase binding	3	0.408163	0.0662923	WBGENE00000857, WBGENE00003006, WBGENE00001101	389	11	9934	6.96471	1	0.691334	0.670026
GOTERM_MF_DIRECT	GO:0008143~poly(A) binding	3	0.408163	0.0775513	WBGENE00003903, WBGENE00001484, WBGENE00006331	389	12	9934	6.38432	1	0.780861	0.756794
GOTERM_MF_DIRECT	GO:0005112~Notch binding	4	0.544218	0.0943532	WBGENE00001103, WBGENE00021513, WBGENE00001105, WBGENE00021525	389	28	9934	3.64818	1	0.918371	0.890065
GOTERM_MF_DIRECT	GO:0030414~peptidase inhibitor activity	5	0.680272	0.0976335	WBGENE00011328, WBGENE00002181, WBGENE00007479, WBGENE00018824, WBGENE00020017	389	45	9934	2.83748	1	0.919645	0.8913

## Sheet: DAVID calcium ion binding
Gene ID	Gene Name	Species
WBGene00018304	Agrin (agr-1)	Caenorhabditis elegans
WBGene00001475	Cadherin EGF LAG seven-pass G-type receptor fmi-1 (fmi-1)	Caenorhabditis elegans
WBGene00022103	Cadherin domain-containing protein (cdh-12)	Caenorhabditis elegans
WBGene00000401	Cadherin domain-containing protein (cdh-9)	Caenorhabditis elegans
WBGene00000396	Cadherin-4 (cdh-4)	Caenorhabditis elegans
WBGene00017028	Dendrite extension defective protein 1 (dex-1)	Caenorhabditis elegans
WBGene00019184	EF-hand domain-containing protein (H10E21.4)	Caenorhabditis elegans
WBGene00019285	EF-hand domain-containing protein (cbn-1)	Caenorhabditis elegans
WBGene00008779	EGF-like domain-containing protein (F14B4.1)	Caenorhabditis elegans
WBGene00022816	EGF-like domain-containing protein (fbn-1)	Caenorhabditis elegans
WBGene00013416	Multiple epidermal growth factor-like domains protein 6 (Y64G10A.7)	Caenorhabditis elegans
WBGene00003772	Neurexin like receptor 1 (nlr-1)	Caenorhabditis elegans
WBGene00007170	Nidogen (B0393.5)	Caenorhabditis elegans
WBGene00000792	uncharacterized protein (crb-1)	Caenorhabditis elegans

## Sheet: Sheet5
fmo-4 OE	Log2Fc/N2	Fc/N2	pval
C03A7.14	6.95253	123.857	1.57893e-05
T25E4.1	6.01187	64.5289	0.000353111
T06E4.9	5.63854	49.816	0.0047808
T18H9.1	5.41139	42.5591	0.00271971
C03A7.4	5.10797	34.4866	0.0186045
F22F7.6	5.09901	34.2733	0.0185231
K10C2.5	5.08476	33.9364	0.0048173
T01D3.2	5.06009	33.3609	0.00630763
C12D8.14	4.95864	31.0957	0.0268625
W03D2.9	4.82066	28.2593	0.0122713
K01D12.1	4.80478	27.9502	0.000269729
Y57G11A.207	4.78987	27.6628	0.0384356
F43G6.16	4.78775	27.6221	0.0371405
T06E4.14	4.66914	25.442	0.00545944
W04E12.9	4.53993	23.2625	0.0102676
AC3.4	4.53989	23.2618	0.0103986
C03A7.7	4.46566	22.0952	0.0206689
T16G1.8	4.43513	21.6325	0.0291694
Y110A2AL.1	4.43499	21.6304	0.00930196
Y6G8.1	4.40911	21.2459	0.034959
F38A1.7	4.38167	20.8456	0.0430279
C05G5.6	4.34427	20.3121	0.0390181
ZK1010.6	4.31972	19.9694	0.0390315
Y46G5A.39	4.21141	18.5251	0.0493543
F39E9.14	4.20949	18.5005	0.0119828
C44B11.1	4.1628	17.9113	0.0216555
F33A8.9	4.13782	17.6038	0.0148481
F33E2.3	4.11093	17.2788	0.0171396
R03C1.1	4.10296	17.1836	0.0196148
C02E7.6	4.04362	16.4911	0.0268882
D1007.1	4.04139	16.4657	0.020329
Y69A2AL.1	4.02162	16.2416	0.00440917
C08E3.3	3.99945	15.994	0.0328635
Y105C5B.14	3.98174	15.7987	0.00476679
R186.2	3.93719	15.3184	0.0252608
Y45F3A.8	3.89004	14.8258	0.0267171
F49D11.6	3.84091	14.3295	0.0279725
F56H6.2	3.8331	14.2521	0.043567
F18C5.9	3.77395	13.6796	0.0110786
C46E10.5	3.77114	13.6529	0.000356333
F33H12.7	3.7468	13.4246	0.0482697
Y82E9BR.20	3.7272	13.2434	0.0402841
F08H9.4	3.68967	12.9033	0.0421648
F17B5.6	3.67032	12.7314	0.0467866
C24A8.6	3.6394	12.4615	0.0426707
F55C5.11	3.62117	12.305	0.0495862
F56A3.5	3.61546	12.2563	0.00160581
Y59E1A.2	3.54599	11.6802	0.00345646
Y57G11C.39	3.54076	11.6379	0.0183463
Y47D3B.6	3.51966	11.4689	1.72967e-05
T06E4.12	3.49499	11.2745	0.0325803
T05A7.3	3.4917	11.2488	0.0177982
F41F3.3	3.46201	11.0197	0.00489508
F35D2.2	3.32754	10.0389	0.0130657
F43E2.9	3.304	9.87648	0.00995683
B0222.7	3.30216	9.86391	0.00216333
Y38A10A.11	3.30184	9.86172	0.0464873
C01B12.1	3.24636	9.48969	0.0148386
C02E7.7	3.18461	9.09206	0.000905363
D2096.6	3.05443	8.30758	0.00247174
F33D4.6	3.02293	8.12818	0.00321813
F09F9.2	3.01015	8.05646	0.000891921
ZK616.9	2.98916	7.94013	0.0221787
F35E12.2	2.96355	7.80044	0.00829561
H36L18.1	2.93497	7.64741	0.00362574
ZK662.2	2.90711	7.50113	0.00339572
F58H1.2	2.89451	7.43591	0.00466304
B0391.14	2.8911	7.41836	0.0184476
Y105C5B.29	2.8773	7.34775	0.0399293
C47F8.8	2.83116	7.11647	0.0366435
F56D5.1	2.80438	6.98559	0.0217353
T28C6.4	2.80199	6.97403	0.0210074
T04C12.1	2.7903	6.91775	0.0325825
Y47D7A.15	2.78	6.8685	0.0313132
W04C9.3	2.77595	6.84928	0.00129314
H04M03.4	2.76484	6.79673	3.17682e-05
C03C10.5	2.75686	6.75926	0.000199298
K08C9.4	2.73665	6.6652	0.00201117
T03G6.1	2.73	6.63457	6.9868e-05
C32B5.7	2.72851	6.62773	0.0201082
H10E21.4	2.71855	6.5821	0.0430144
C03G6.8	2.70575	6.52396	0.021759
C14A4.9	2.7037	6.51472	0.0138651
C50B6.4	2.7005	6.50026	0.00263722
B0205.13	2.69344	6.46854	1.45712e-13
W04H10.5	2.68887	6.44807	0.00349011
K08D12.4	2.68138	6.41471	0.00923166
F53E10.5	2.66159	6.32729	0.00532445
T23F1.5	2.64962	6.27501	0.0182805
F29C12.1	2.64639	6.26098	5.77303e-05
EGAP7.1	2.63615	6.21671	0.0147562
C34D4.1	2.62538	6.17045	0.00769426
Y54G2A.37	2.62114	6.15238	0.00111916
F36H5.3	2.58933	6.01819	0.00996435
ZC404.1	2.56605	5.92185	0.0300312
F38B6.5	2.56338	5.91089	0.0250644
Y75B8A.20	2.55967	5.89573	0.00720509
ZK1067.7	2.55164	5.86302	0.000787868
F54E2.2	2.54273	5.82692	0.00415572
F58E1.10	2.53575	5.79879	0.000963861
F53F1.5	2.5311	5.78012	0.016461
C01B10.5	2.51838	5.72937	0.0175298
T14F9.5	2.51797	5.72776	0.000251782
F52E1.4	2.51162	5.7026	0.0443379
F41G3.2	2.49296	5.62932	0.0258638
Y45F10C.6	2.48857	5.61223	0.0026903
R02F11.1	2.45377	5.47847	0.00497027
ZC123.1	2.43118	5.39334	0.0069247
ZK675.4	2.41578	5.33608	0.00763697
Y57E12B.3	2.40282	5.28836	0.0146862
Y43F8C.4	2.40169	5.2842	0.0244816
F17A9.3	2.39884	5.27379	0.00617802
Y57A10C.10	2.38997	5.24145	0.0433822
Y17G9A.1	2.37832	5.19933	0.0333132
F45C12.11	2.37035	5.17066	0.0398929
W04G3.1	2.36987	5.16895	0.000871293
F40H3.3	2.3576	5.12519	0.0348425
T06E4.6	2.35106	5.10201	0.00528661
W02B8.5	2.34178	5.06928	0.0197878
F53C3.3	2.33419	5.04268	0.0207661
T22H2.4	2.32733	5.01877	0.0299707
T21D12.7	2.30853	4.95376	0.0244093
Y63D3A.3	2.30467	4.94053	6.91877e-07
F26A10.28	2.29622	4.91169	0.0420661
F58F6.1	2.28714	4.88087	0.00659769
4R79.1	2.28686	4.87993	0.0450027
T14B4.6	2.26699	4.81317	7.32208e-05
Y53F4B.27	2.26152	4.79497	0.0375337
F56D2.3	2.25647	4.7782	0.00474637
C25F9.1	2.24998	4.75676	0.00234387
ZK180.5	2.24919	4.75415	0.0439624
R07E3.3	2.24305	4.73398	0.0033259
F46C8.2	2.2403	4.72495	0.0261786
C44H9.7	2.2254	4.67642	0.0017985
M142.2	2.20776	4.61959	0.00499856
K08F8.2	2.19383	4.57518	0.000129527
Y46H3A.2	2.19086	4.56578	0.0117673
F42G2.3	2.18522	4.54797	0.00853206
Y102A11A.5	2.18392	4.54385	0.00384586
Y51H7C.10	2.17855	4.52699	0.0061687
R12A1.3	2.17709	4.52241	0.0224693
F46C8.6	2.16714	4.49131	0.0326444
C40A11.10	2.16509	4.48494	0.00276262
T24A6.8	2.16193	4.47513	0.0267892
ZC13.4	2.1556	4.45553	0.00304261
F40E10.5	2.15438	4.45176	0.0378612
Y53C12C.1	2.15427	4.45142	0.000447053
ZK1248.2	2.13853	4.40312	0.000820089
T16A1.1	2.13559	4.39416	0.00689172
F49B2.3	2.13094	4.38003	0.0100164
Y38H6A.5	2.11961	4.34576	0.0130775
W04G3.2	2.11553	4.33348	0.00167496
F08D12.12	2.11376	4.32817	0.0467787
Y38C1BA.3	2.11292	4.32565	0.0441322
C15C8.2	2.09768	4.28022	0.0412203
C44H4.1	2.08898	4.25448	0.00283385
B0491.4	2.08631	4.24661	0.00362297
F15B9.8	2.06475	4.18362	0.00457842
Y41D4B.6	2.06402	4.18151	0.00808834
T11F9.9	2.04454	4.12541	0.0355165
T05H10.3	2.04171	4.11734	0.0020877
SSSD1.1	2.04029	4.11328	6.56135e-05
F22F4.1	2.03798	4.10669	0.000364286
Y113G7A.6	2.03456	4.09699	0.00107515
ZC84.7	2.03056	4.08564	0.0410321
C44C10.1	2.02818	4.0789	0.00386399
T04H1.6	2.01985	4.05541	0.0228891
C10A4.3	2.01487	4.04144	0.0156074
F47C12.1	2.01443	4.04022	0.000289302
Y47G6A.17	1.99349	3.98198	0.00612025
B0304.3	1.99274	3.97992	0.0367769
T10E10.2	1.98366	3.95495	0.00727321
F26D10.11	1.98186	3.95001	0.00615026
C17E4.19	1.97923	3.94283	0.0224617
ZC190.5	1.97811	3.93977	0.00157416
F23A7.1	1.97393	3.92836	0.0318018
R03H10.2	1.97374	3.92786	2.3109e-05
F27E5.4	1.96581	3.90631	0.0147431
ZK377.1	1.96074	3.8926	0.0191352
ZK993.1	1.95461	3.87612	0.00595199
T24H10.5	1.94612	3.85336	0.00167583
K10G6.4	1.94564	3.85208	0.0130609
H42K12.3	1.94319	3.84555	0.00726247
C09F9.7	1.9409	3.83944	0.0448517
Y2H9A.3	1.94007	3.83725	0.00945065
Y52B11A.12	1.93825	3.8324	0.0471247
Y46H3A.3	1.93419	3.82162	0.0378648
F57A10.5	1.93239	3.81688	0.00549792
F58E6.13	1.9254	3.79841	0.0308912
T10D4.6	1.91207	3.76348	9.75874e-16
ZC13.3	1.90644	3.74884	0.0357619
Y51H7C.12	1.90302	3.73995	0.019363
F18E9.1	1.89981	3.73165	0.0384601
Y39A1A.9	1.89701	3.7244	0.0177324
F53C3.6	1.8962	3.72232	0.00840428
W01F3.3	1.89567	3.72094	0.0477168
ZC328.1	1.89483	3.71879	0.00079398
F23H12.4	1.88603	3.69616	0.0438708
R12E2.14	1.88554	3.69491	0.0454429
ZC204.14	1.88204	3.68595	6.06007e-08
K08B12.1	1.87867	3.67735	0.0379469
W06A11.3	1.87754	3.67449	0.0303758
C16C8.2	1.87044	3.65645	0.0349155
C25D7.3	1.86865	3.6519	1.52255e-15
ZK1290.12	1.86486	3.64232	0.00238361
F56E3.4	1.86204	3.63521	0.0457623
F13D11.2	1.85972	3.62937	0.000541618
C48B4.3	1.85761	3.62407	0.0177028
C02F12.1	1.8512	3.60801	0.00216379
ZC168.2	1.84723	3.59809	0.0406659
T02E9.2	1.84471	3.59181	0.0161495
T19A5.3	1.83843	3.57622	0.00785191
C26F1.1	1.83829	3.57585	0.0336372
ZC101.3	1.83555	3.56907	0.00194187
T10D4.5	1.83463	3.5668	0.0169027
Y74E4A.1	1.83421	3.56577	0.00119644
T02G5.15	1.83358	3.56421	0.0197478
Y60A9A.3	1.82477	3.54252	0.042748
F59A7.4	1.82439	3.54158	0.0273273
F58E6.10	1.82192	3.53552	0.00376495
C44B9.6	1.81858	3.52733	0.0480878
F44E5.5	1.79891	3.47956	0.0473864
C07G3.8	1.79824	3.47797	0.0480236
W02A2.3	1.78996	3.45805	0.00636043
R01B10.2	1.78811	3.45362	0.0062154
ZK265.4	1.77831	3.43024	0.0327894
W04H10.6	1.77169	3.41453	0.0389373
C14F11.6	1.76947	3.40928	0.00706594
F36H5.7	1.76591	3.40089	0.0111496
F31D4.5	1.76558	3.40012	0.0115498
T14G12.4	1.76499	3.39871	0.000153027
M163.3	1.757	3.37994	0.000454406
ZK662.8	1.74944	3.36228	0.0451385
C04C3.5	1.74575	3.35369	2.11365e-06
Y43F8B.3	1.74512	3.35223	0.00251631
C18D4.6	1.74475	3.35136	6.61864e-12
M142.4	1.74258	3.34633	0.0103006
C14C11.8	1.74103	3.34274	0.0184195
F54B11.10	1.74079	3.34218	0.0429857
F46F3.1	1.73866	3.33726	5.21422e-06
F28F9.1	1.73291	3.32399	0.00155097
D1054.9	1.72943	3.31596	0.0435462
F40E10.1	1.72722	3.3109	0.000692611
ZK909.4	1.72333	3.30198	0.000318196
T24B8.6	1.72091	3.29645	6.57487e-05
2RSSE.6	1.71799	3.28977	0.0246464
T23F2.1	1.71263	3.27758	0.0100567
F59B10.3	1.71209	3.27635	0.0405155
F41A4.1	1.71073	3.27326	0.0153283
T22F7.5	1.70802	3.26712	0.0194544
C44H4.3	1.69964	3.24819	0.000565576
C45B2.7	1.6992	3.2472	0.00779997
ZK1290.8	1.69361	3.23466	0.00181822
B0393.5	1.69263	3.23246	0.000613146
Y116F11A.1	1.68674	3.21929	0.00859842
K01A2.11	1.68625	3.21819	0.0229397
ZK75.2	1.68369	3.21248	0.00871396
C52E2.7	1.6695	3.18105	0.00349706
ZK328.8	1.666	3.17334	0.005734
Y69A2AR.29	1.66563	3.17252	0.00194396
M03A1.7	1.66351	3.16786	0.00056779
F20A1.7	1.66248	3.1656	0.013623
F21D9.1	1.65883	3.1576	0.0465338
T08H4.3	1.65745	3.15459	0.0119759
Y17G9B.11	1.65189	3.14245	0.0339655
T14B4.7	1.64435	3.12607	0.000441379
M03B6.3	1.64112	3.11908	0.00139574
F56A12.1	1.64055	3.11785	0.00164457
DY3.3	1.63694	3.11006	0.000664784
2RSSE.2	1.63654	3.1092	0.00248695
Y73E7A.8	1.63652	3.10915	0.0293749
F09F9.4	1.63439	3.10457	0.00897603
Y39A1B.2	1.63279	3.10113	0.0420711
C44H4.2	1.62672	3.08811	0.00149689
ZC84.6	1.624	3.08229	0.0363287
C03C10.9	1.62283	3.07979	0.0145058
T03G11.3	1.61211	3.05698	0.0407317
F22F1.1	1.61024	3.05303	0.000501506
F52E10.5	1.60836	3.04906	0.0128051
F32E10.3	1.60741	3.04705	0.0298786
Y17G9B.7	1.605	3.04196	0.0011464
W06A11.4	1.60201	3.03565	1.05799e-09
C54G4.4	1.59845	3.02817	0.0440748
F52B10.2	1.59497	3.02089	0.00239782
DY3.5	1.59474	3.0204	0.0172817
ZC455.10	1.58526	3.00062	0.00351533
F01E11.1	1.58517	3.00043	0.00142526
F43G9.11	1.58174	2.99332	0.003075
Y71H2AM.15	1.57775	2.98504	0.000163498
Y41C4A.11	1.57687	2.98322	3.30298e-05
Y116A8C.19	1.57644	2.98233	0.025564
T06D8.3	1.57589	2.98119	0.0329258
F15B9.7	1.57043	2.96994	0.00134315
F52B11.3	1.56631	2.96147	0.00073286
Y65A5A.1	1.56492	2.95861	0.000795087
F57B9.9	1.55643	2.94126	0.0185804
Y110A2AL.4	1.55592	2.94021	0.00954107
C33D12.7	1.55534	2.93903	0.014385
K08H2.4	1.55286	2.93398	0.00177951
Y73C8C.2	1.54499	2.91802	0.00422948
C45G7.4	1.54325	2.9145	0.00899251
C46A5.3	1.54068	2.90932	0.0340845
Y73B6BL.12	1.53907	2.90606	0.000162403
Y38F2AL.1	1.53714	2.90219	0.000657398
C08F1.10	1.53556	2.899	6.0246e-05
C01G6.1	1.52867	2.88519	0.000285972
ZC513.8	1.52413	2.87613	0.00336056
T01D3.3	1.52341	2.8747	0.00878017
T22A3.2	1.51983	2.86757	0.00105492
K03D10.1	1.51738	2.86271	0.000834644
C40A11.2	1.51442	2.85684	9.31207e-05
C24H12.2	1.51028	2.84866	0.0321522
F46E10.2	1.50965	2.84741	0.00014793
F39H12.4	1.50353	2.83536	0.00592048
F26D10.12	1.50016	2.82875	0.00605714
C08F1.11	1.49777	2.82405	0.014196
T26H2.10	1.49748	2.82349	0.0144995
F31E9.6	1.49462	2.8179	4.18499e-06
F29F11.5	1.49248	2.81371	0.0326978
C28A5.4	1.48691	2.80287	0.000370134
Y116A8B.1	1.48587	2.80086	0.0187566
C50F2.8	1.48469	2.79858	0.0192441
F09E10.6	1.48338	2.79603	0.0335379
R05H5.8	1.4818	2.79298	0.0240556
F47F6.1	1.48165	2.79268	0.0113287
F55B12.11	1.4801	2.78967	0.0177506
T08E11.6	1.47512	2.78006	0.00988206
F13E9.11	1.46783	2.76605	0.00333613
C09F9.2	1.46742	2.76528	0.00222892
C03A3.1	1.46621	2.76295	0.000791659
T10B9.3	1.46593	2.76242	0.0487555
C09G5.4	1.46569	2.76196	0.0177755
T24B8.3	1.4626	2.75605	0.000292278
B0272.1	1.461	2.753	0.0116786
Y38E10A.5	1.46094	2.75288	0.014514
Y50E8A.5	1.45896	2.7491	0.0275805
C42D8.5	1.4561	2.74366	0.0105525
F09B12.1	1.45106	2.73408	0.0400603
R07E3.6	1.44516	2.72293	0.00343046
K02E10.4	1.44502	2.72267	0.000575478
F36H5.4	1.44483	2.72231	0.00120401
F55F8.1	1.43807	2.70957	0.0320408
T19C4.1	1.43589	2.70548	0.0261732
C49A1.4	1.43541	2.70459	4.2824e-05
R07C3.5	1.4352	2.7042	0.000827317
F32H2.6	1.43425	2.70242	0.016648
C06E7.4	1.43048	2.69536	0.000296085
F31E8.3	1.42887	2.69235	0.0405764
W09G12.4	1.42509	2.68531	0.0451641
F58G6.9	1.41799	2.67213	1.2523e-06
T02E9.5	1.41287	2.66267	0.00152427
F57G9.3	1.41074	2.65874	0.030449
F11C1.6	1.40896	2.65545	0.00060428
F29C4.8	1.4021	2.64286	0.00601835
K12H4.1	1.40174	2.64221	0.00538372
K11G9.4	1.39867	2.63658	0.0149751
F14B4.1	1.39863	2.63652	0.00303893
Y51A2D.15	1.39836	2.63602	0.0013477
T23D8.8	1.39623	2.63213	0.0102696
F58D2.1	1.38956	2.61999	0.0192538
F48E3.9	1.38895	2.61888	0.0219921
Y38H6C.14	1.38716	2.61563	0.029396
Y69A2AR.25	1.37763	2.5984	0.0265496
F13H8.8	1.37733	2.59787	0.0235243
ZK938.2	1.37696	2.59721	0.000101316
B0304.1	1.37613	2.59571	0.00483548
Y51H4A.4	1.37123	2.5869	0.00534694
H25K10.1	1.36982	2.58438	0.0415456
Y25C1A.6	1.36908	2.58306	0.0123815
ZK265.7	1.36562	2.57688	0.0121277
F13H10.5	1.3652	2.57611	0.0121521
Y37E11AL.5	1.36087	2.5684	0.00675473
M28.1	1.36069	2.56807	0.0169771
F26A10.2	1.35758	2.56255	0.017385
F29G9.1	1.35708	2.56166	0.00855443
C26C6.7	1.33782	2.5277	0.0252913
T05E11.9	1.33123	2.51618	1.63701e-06
H19M22.3	1.33036	2.51465	0.00678931
F54C9.4	1.32562	2.50641	0.0108622
Y63D3A.2	1.32157	2.49939	0.00810974
C34G6.6	1.32021	2.49703	0.00765692
C16C4.6	1.31723	2.49187	0.0295104
M03D4.4	1.3145	2.48717	0.0153141
F45D11.13	1.31432	2.48685	0.046256
C36F7.4	1.31331	2.4851	0.0313637
Y7A9D.1	1.31313	2.48481	0.0040496
T03D3.5	1.31226	2.4833	8.22681e-05
H24O09.2	1.31031	2.47995	0.0378606
H19N07.3	1.30741	2.47496	2.80558e-08
F40G9.20	1.30613	2.47277	0.0484218
Y45G5AM.5	1.30037	2.46291	0.00189016
ZK783.1	1.29954	2.46151	0.00195196
C10G8.6	1.29462	2.45313	0.00795866
F11D5.3	1.2912	2.44732	0.00708631
F59B2.8	1.29109	2.44712	0.025989
M01E10.2	1.29044	2.44602	0.0496421
T04D3.2	1.28759	2.4412	0.00672654
ZK757.2	1.28598	2.43847	0.0236582
F33H2.8	1.28494	2.43672	0.0230593
ZC132.4	1.28419	2.43545	0.000315914
Y53C12B.6	1.28327	2.4339	0.00568811
K06A1.3	1.27909	2.42685	0.0227149
C40A11.8	1.27634	2.42223	0.043625
C43C3.3	1.27384	2.41804	0.00727319
D1044.2	1.27271	2.41616	0.000116031
F27E11.3	1.2647	2.40278	0.000718868
F26B1.7	1.26429	2.40209	0.0306657
Y46B2A.1	1.26149	2.39743	0.00259779
C40A11.6	1.2571	2.39015	0.00465524
T05A7.4	1.25695	2.38989	0.00258294
F33E2.5	1.25249	2.38251	0.00606939
C25B8.4	1.25141	2.38073	0.00368844
Y116F11B.10	1.25023	2.3788	0.000823464
W05E10.3	1.24825	2.37553	0.00047399
C08F8.15	1.2477	2.37463	0.012646
R03C1.3	1.24609	2.37198	0.0495284
Y15E3A.1	1.24533	2.37073	0.00309156
C37E2.4	1.24505	2.37027	0.0273032
M01D1.10	1.24269	2.36639	0.0139139
F58A4.11	1.234	2.35218	0.0233464
C05A9.2	1.23166	2.34837	0.000633883
C47G2.2	1.23041	2.34633	0.0194421
F59C12.1	1.23014	2.3459	0.0051616
Y55D5A.1	1.22896	2.34399	0.0115221
K02B12.1	1.22862	2.34342	0.00503443
K10D6.2	1.22618	2.33947	0.00973802
F36H5.13	1.22123	2.33145	0.0123097
F48E3.6	1.22099	2.33106	0.000293371
F15B10.3	1.21866	2.3273	0.00105006
F39D8.2	1.21143	2.31568	0.0147496
T26E3.2	1.21108	2.31511	0.0426362
C47C12.3	1.21096	2.31491	0.0128145
M01D1.2	1.20942	2.31244	0.0462304
ZK287.1	1.20842	2.31085	0.032145
F20B10.1	1.20226	2.30099	0.00284194
Y46H3C.5	1.19837	2.29481	0.0273469
Y49F6C.4	1.19257	2.2856	0.00306654
Y71D11A.1	1.19206	2.28479	0.0121651
Y71F9AL.7	1.19169	2.2842	0.048092
F55A4.10	1.18852	2.27918	0.0374054
T28F2.4	1.18513	2.27384	0.00226975
R07C3.7	1.1841	2.27222	0.00407577
C25F6.7	1.18322	2.27082	0.0244068
C13G5.1	1.18108	2.26747	0.0235489
W01B6.1	1.1805	2.26655	0.00198367
T09B4.5	1.17858	2.26353	0.000540245
R02D5.1	1.17561	2.25888	0.0172036
ZK512.1	1.17374	2.25596	0.0144928
Y73B6BL.9	1.17312	2.25499	0.00201648
Y82E9BR.17	1.17221	2.25357	0.000137689
R11G1.7	1.17107	2.25178	0.0107435
F53B2.6	1.16875	2.24817	0.0059188
T05A6.1	1.16828	2.24744	0.000928532
C53C11.5	1.16757	2.24633	0.0464867
Y102A11A.8	1.16667	2.24493	0.00421914
R13H4.1	1.16583	2.24363	0.0296645
F59D12.4	1.16415	2.24102	0.0439666
F54A5.2	1.16391	2.24063	0.00939242
C45B11.6	1.16316	2.23948	0.0270179
C25B8.1	1.16228	2.23811	0.0129339
T26C12.3	1.15777	2.23113	0.00212128
EEED8.2	1.15728	2.23036	0.00277026
C10A4.8	1.15543	2.22751	0.0203263
T27B1.2	1.15242	2.22287	0.00295336
H37A05.4	1.15047	2.21986	0.0204706
Y41D4B.10	1.14942	2.21824	0.00418583
W04B5.2	1.1492	2.2179	0.0277571
T07C4.2	1.14736	2.21508	0.0402741
K09F6.8	1.14272	2.20798	0.0268027
Y53C10A.4	1.14068	2.20484	0.019702
F44E2.4	1.13969	2.20334	0.0429014
C32B5.1	1.13969	2.20333	0.00714136
K11H12.5	1.13894	2.20218	0.0471966
F25E5.1	1.1387	2.20182	0.000276612
M110.1	1.13679	2.19891	0.00699908
C52B9.6	1.13596	2.19764	0.0323971
C04G2.7	1.13478	2.19585	0.0463037
Y73B6BL.21	1.13473	2.19578	0.028158
C41H7.7	1.13434	2.19518	0.0181139
T04B8.3	1.13294	2.19306	0.00999673
C04F6.3	1.13266	2.19263	0.000704543
K02E10.1	1.13226	2.19202	0.00173566
W04A8.4	1.13226	2.19202	0.0128865
Y55B1BR.3	1.12851	2.18633	0.00362463
K10D3.4	1.12794	2.18546	0.000550419
K11D12.4	1.11916	2.17221	0.00320648
B0285.7	1.11902	2.17199	0.00147889
K02D3.1	1.11869	2.1715	0.0383575
Y75B8A.6	1.11186	2.16124	0.00390965
C08C3.3	1.11047	2.15916	0.00945791
Y56A3A.15	1.10757	2.15483	0.0100295
C01G5.9	1.10321	2.14833	0.0145945
Y71A12B.11	1.10117	2.14528	0.00361624
D1069.2	1.101	2.14504	0.000477453
F39F10.4	1.10074	2.14465	0.00675595
F45C12.6	1.10029	2.14398	0.0397273
C47D12.4	1.10016	2.14379	0.0170465
ZK930.3	1.09954	2.14286	0.0377199
C26G2.1	1.09711	2.13925	0.00311808
F49E12.6	1.09103	2.13026	0.000194238
C18A3.8	1.08234	2.11747	0.0240648
Y71F9B.8	1.08112	2.11568	0.00301236
W03F9.4	1.07657	2.10901	0.00665351
C24H12.1	1.0763	2.10863	0.00310275
T01G9.3	1.07471	2.1063	0.0360884
F08C6.4	1.07182	2.10208	3.14937e-05
F41G3.12	1.0699	2.09929	0.0121561
Y37E11AR.6	1.06922	2.0983	0.0180018
C08F1.6	1.06632	2.09408	0.00937962
C36F7.1	1.06541	2.09276	0.00669513
ZK930.6	1.06534	2.09267	0.0355323
D2023.7	1.05909	2.08362	0.0188898
Y51H7BR.1	1.05841	2.08263	0.0311067
F38A6.1	1.05721	2.0809	0.00869783
Y46G5A.27	1.0566	2.08002	0.0102842
F08D12.6	1.05494	2.07763	0.0337602
Y106G6D.1	1.05479	2.07742	0.00174589
C52D10.7	1.05387	2.0761	0.00103566
F40G9.6	1.0513	2.0724	0.0196999
F39D8.1	1.0491	2.06924	0.0386414
R07B1.9	1.04522	2.06368	0.0419617
C43E11.6	1.04384	2.06171	0.00501874
F23D12.3	1.04294	2.06043	0.0216366
ZK822.1	1.03947	2.05547	0.0425826
T06E4.4	1.03451	2.04842	0.0302683
F13C5.2	1.03203	2.0449	0.00157753
Y38H6C.16	1.03166	2.04437	0.0071276
F58E1.3	1.03051	2.04274	0.010691
ZK1053.4	1.028	2.03919	0.00449235
F32A7.3	1.02535	2.03546	0.043743
R148.5	1.02139	2.02987	0.0141306
M04F3.3	1.01812	2.02527	0.0242441
F44F1.6	1.01592	2.0222	0.00447657
F20C5.6	1.01503	2.02094	0.0146154
Y105C5B.13	1.01133	2.01577	0.000154583
F29B9.9	1.01117	2.01554	0.0312234
F28D1.2	1.01052	2.01464	0.00183779
T05D4.2	1.00966	2.01344	0.00752559
T07H8.6	1.00893	2.01242	0.0321642
Y20C6A.2	1.00754	2.01048	3.36013e-05
M01D1.9	1.00298	2.00413	0.0196924
Y106G6D.2	1.00223	2.0031	0.0048738
C30G12.1	1.00007	2.0001	0.0184596
C39E6.4	0.997602	1.99668	0.0409012
Y51A2D.19	0.997481	1.99651	0.0022801
F07E5.2	0.995892	1.99431	0.0178971
T25D10.4	0.993997	1.9917	0.00148496
C07A12.1	0.993182	1.99057	0.0285249
T04B8.2	0.992343	1.98941	0.00944114
Y49F6B.7	0.9915	1.98825	0.0235492
F31E3.1	0.989837	1.98596	0.0013425
F56E10.2	0.985956	1.98063	0.0496535
ZK896.5	0.985853	1.98048	0.00959185
F52C12.5	0.983569	1.97735	0.0377164
T28D6.4	0.981806	1.97494	0.0092475
F45D11.5	0.981396	1.97438	0.0381016
W03G11.4	0.979372	1.97161	0.0113885
B0250.12	0.978988	1.97108	0.0319686
K09F5.6	0.975614	1.96648	0.0113112
F45H11.1	0.973306	1.96333	0.00173662
K03D7.1	0.972475	1.9622	0.031672
F02G3.1	0.971784	1.96126	0.011682
Y55D5A.6	0.971501	1.96088	0.039733
M01E5.6	0.969478	1.95813	0.018666
C16B8.4	0.968858	1.95729	0.00981433
T13F2.8	0.967979	1.9561	0.00177054
F34D10.6	0.963994	1.9507	0.0370477
C24H10.1	0.962951	1.94929	0.0168854
W09C2.1	0.961791	1.94773	0.00189229
Y57A10A.23	0.959723	1.94494	0.00237666
B0228.6	0.957626	1.94211	0.0120515
F53B3.5	0.956951	1.9412	0.0206339
Y46G5A.43	0.955233	1.93889	0.02429
R02F2.2	0.952041	1.93461	0.0161074
K01A2.8	0.950943	1.93314	0.00272888
R04A9.7	0.950563	1.93263	0.0171213
ZK520.3	0.949071	1.93063	0.00881127
Y49F6C.3	0.943174	1.92275	0.0104146
F07H5.13	0.942175	1.92142	0.0231794
Y49A10A.2	0.939405	1.91774	0.00755757
F32D1.3	0.937674	1.91544	0.00711617
F11C7.4	0.928476	1.90326	0.00778804
C25F6.2	0.925975	1.89997	0.0015474
K08B4.3	0.924715	1.89831	0.00556765
F41B5.1	0.923306	1.89646	0.0290213
Y39G10AR.10	0.918324	1.88992	0.00653101
C50F2.6	0.917896	1.88936	0.00683983
F23F12.9	0.91762	1.889	0.00702704
T23C6.4	0.917235	1.88849	0.0219707
Y41D4B.26	0.911683	1.88124	0.0460345
Y64G10A.7	0.90793	1.87635	0.0216056
R03E9.2	0.903435	1.87051	0.0271185
F44C4.5	0.903171	1.87017	0.00556975
R10E4.2	0.902919	1.86985	0.00255879
F58B3.9	0.901792	1.86839	0.000378829
T02C5.3	0.898089	1.8636	0.00780644
F54C8.6	0.895301	1.86	0.0363099
Y73F8A.26	0.89496	1.85956	0.0053885
T16A1.8	0.894897	1.85948	0.00750561
M01D1.3	0.891755	1.85543	0.0197327
Y46G5A.7	0.888858	1.85171	0.0335655
C11H1.7	0.888829	1.85167	0.0443245
K05F6.1	0.886715	1.84896	0.0303086
F35D2.3	0.885753	1.84773	0.0184353
Y46D2A.2	0.883057	1.84428	0.044941
K08H2.1	0.882041	1.84298	0.00165976
ZC204.2	0.881867	1.84276	0.046681
F52B10.3	0.880925	1.84156	0.0351606
Y54G11A.9	0.880567	1.8411	0.0466994
F58H1.5	0.878611	1.8386	0.0169146
K05F1.5	0.874155	1.83293	0.0241575
C33F10.7	0.874032	1.83278	0.0118072
C32B5.14	0.873511	1.83212	0.00943223
R13A5.5	0.87097	1.82889	0.0245135
F42G9.2	0.870469	1.82826	0.00188624
C06B8.7	0.869021	1.82642	0.0111685
C02F12.7	0.862526	1.81822	0.015225
C41H7.8	0.86135	1.81674	0.0248365
Y71A12B.12	0.858877	1.81363	0.0491853
B0511.1	0.85643	1.81055	0.0344379
Y57G11A.1	0.855855	1.80983	0.0179325
C33B4.3	0.853785	1.80724	0.00764465
C39B5.2	0.852697	1.80587	0.00400137
C05D9.7	0.852472	1.80559	0.0263406
C34E7.4	0.850605	1.80326	0.0054109
F12E12.8	0.8468	1.79851	0.0324277
C14F11.2	0.844423	1.79555	0.0196281
C35E7.5	0.839852	1.78987	0.00659162
Y71A12B.17	0.83689	1.7862	0.0116318
F53F10.1	0.835859	1.78492	0.0297716
T05E7.5	0.833113	1.78153	0.0194425
M88.1	0.828842	1.77626	0.000828782
C17E4.2	0.82746	1.77456	0.0498433
T22A3.8	0.826859	1.77382	0.0151575
F52F12.6	0.826227	1.77304	0.00382411
C52B11.2	0.824815	1.77131	0.0161713
C33D9.6	0.822655	1.76866	0.0242018
Y66D12A.12	0.820586	1.76612	0.00367819
B0507.1	0.819671	1.765	0.0415286
C36A4.14	0.819269	1.76451	0.0436961
Y39G8B.2	0.815613	1.76005	0.0112791
R11A5.3	0.815496	1.7599	0.0369665
F23D12.5	0.813363	1.7573	0.00872286
C26F1.5	0.811597	1.75515	0.0412225
F39C12.3	0.809398	1.75248	0.0107312
C31H5.4	0.809041	1.75205	0.0426878
Y40B1B.3	0.806851	1.74939	0.0367301
Y105E8A.26	0.806197	1.7486	0.018954
T19B10.2	0.80368	1.74555	0.0125925
K02B12.2	0.8036	1.74545	0.0450574
F08D12.10	0.801545	1.74297	0.0187808
F48E3.8	0.799336	1.7403	0.0118073
F10E9.6	0.797474	1.73806	0.00717814
K10G9.3	0.797198	1.73772	0.00740805
C37E2.5	0.796406	1.73677	0.0256045
R52.1	0.796173	1.73649	0.047304
F21H11.3	0.794209	1.73413	0.0117848
Y71F9B.5	0.792276	1.7318	0.00475264
T10B10.3	0.791884	1.73133	0.000380932
D2045.9	0.789265	1.72819	0.00139269
Y49F6C.11	0.788147	1.72685	0.0324954
C52D10.8	0.781869	1.71936	0.0160747
C04G6.6	0.781652	1.7191	0.041819
ZK1067.6	0.781294	1.71867	0.0190144
DC2.7	0.774224	1.71027	0.012772
B0250.4	0.769172	1.70429	0.0361781
ZK512.3	0.767669	1.70252	0.0173283
K08A8.2	0.764056	1.69826	0.0354624
Y75B8A.1	0.759923	1.6934	0.00189479
T03F1.6	0.758042	1.69119	0.0290809
Y48E1B.10	0.758004	1.69115	0.00592267
C52D10.9	0.754292	1.6868	0.0271305
Y47D3A.1	0.749419	1.68112	0.0373304
W02B8.2	0.748979	1.6806	0.00155231
K10B4.6	0.745732	1.67683	0.00663431
C36F7.2	0.74296	1.67361	0.00143503
C14B9.2	0.741376	1.67177	0.0122833
C29E6.1	0.739295	1.66936	0.040957
Y47D3B.10	0.738055	1.66793	0.0195055
C05E11.3	0.734815	1.66418	0.0038636
Y71G12B.20	0.734417	1.66372	0.00387257
EEED8.15	0.728782	1.65724	0.0203304
ZK6.10	0.728704	1.65715	0.0144163
F07D3.2	0.718314	1.64526	0.00655301
F09C8.2	0.717345	1.64415	0.0156908
ZC84.3	0.709932	1.63573	0.00547881
C04A11.2	0.709781	1.63556	0.0318931
Y47H9C.5	0.709374	1.63509	0.0334951
B0261.8	0.705889	1.63115	0.0359459
F58A3.1	0.700754	1.62535	0.0230271
Y47D3B.9	0.700025	1.62453	0.0130797
T22C8.3	0.699775	1.62425	0.0430132
W06D12.3	0.699341	1.62376	0.00953085
F46C8.3	0.698562	1.62289	0.0467715
C17G1.4	0.694801	1.61866	0.00341705
Y57A10A.26	0.694294	1.61809	0.00941225
R08F11.3	0.68965	1.61289	0.032817
F47E1.18	0.68835	1.61144	0.00818971
F41C6.1	0.687268	1.61023	0.0201929
K07C11.4	0.686259	1.60911	0.0313221
F10G8.8	0.682865	1.60532	0.0205026
C05D9.3	0.680165	1.60232	0.00785501
T07D1.4	0.678433	1.6004	0.0158197
F54E2.1	0.673447	1.59488	0.0173461
Y47D7A.8	0.672546	1.59388	0.027004
F25D7.3	0.671864	1.59313	0.0198978
M04G12.4	0.671649	1.59289	0.0128166
C07D10.5	0.671301	1.59251	0.0326062
Y46H3C.7	0.669953	1.59102	0.0147958
F55D10.3	0.662361	1.58267	0.0177772
T08E11.4	0.662332	1.58264	0.0494725
F08G12.1	0.660865	1.58103	0.0354547
T11B7.1	0.656979	1.57678	0.00961981
2RSSE.1	0.656864	1.57665	0.011941
Y38F1A.5	0.655841	1.57553	0.0336414
F42G2.6	0.64812	1.56712	0.0347441
C06G1.4	0.646371	1.56523	0.013861
F59D6.3	0.640405	1.55877	0.0434619
C44F1.1	0.639256	1.55753	0.0389661
F53H10.2	0.638288	1.55648	0.00414735
R13G10.1	0.637561	1.5557	0.0066396
ZK1236.2	0.635315	1.55328	0.00933245
R11E3.2	0.631403	1.54907	0.0397244
F40F4.3	0.629511	1.54704	0.0244664
T22H6.2	0.627297	1.54467	0.00974395
D1009.2	0.618119	1.53487	0.0220379
F59C12.3	0.616061	1.53268	0.0365825
K11C4.4	0.614694	1.53123	0.0114147
K10D6.4	0.608932	1.52513	0.0378977
T08H4.1	0.604514	1.52047	0.0460539
Y71H2AM.16	0.598803	1.51446	0.0447086
F54B11.6	0.588233	1.5034	0.045956
B0273.4	0.583977	1.49898	0.0377235
M05B5.5	0.583745	1.49873	0.0263004
F57C7.3	0.583475	1.49845	0.0191172
F11A6.1	0.580211	1.49507	0.0118113
T04D1.4	0.576958	1.4917	0.043313
T28F12.2	0.566118	1.48053	0.0276642
W01C8.5	0.563835	1.47819	0.0495149
F25F2.2	0.558125	1.47235	0.0361434
Y38C1AA.4	0.557016	1.47122	0.0287704
T14G8.1	0.548643	1.46271	0.0136435
F36D3.1	0.546698	1.46074	0.0158464
C32E12.5	0.544196	1.45821	0.049934
C05D9.5	0.543824	1.45783	0.0327604
C01F1.3	0.542939	1.45694	0.034285
F46A9.6	0.542914	1.45691	0.0488042
F08G12.10	0.541475	1.45546	0.0346106
T22D2.1	0.540929	1.45491	0.0323777
F54D5.5	0.540281	1.45426	0.0263298
W06H12.1	0.53757	1.45153	0.0145301
M142.1	0.535447	1.44939	0.0218447
H28G03.2	0.529655	1.44358	0.0394246
C33G3.4	0.527389	1.44132	0.0473127
M88.6	0.526359	1.44029	0.0434511
F52H3.3	0.524246	1.43818	0.0123935
F15D3.1	0.519345	1.4333	0.0273152
C16H3.3	0.515912	1.4299	0.0488376
C17E4.20	0.512819	1.42684	0.0194307
B0403.4	0.50529	1.41941	0.0143294
F53H8.1	0.50296	1.41712	0.022535
C30F8.4	0.501701	1.41588	0.0369081
K11E4.4	0.501241	1.41543	0.0325799
M01E11.7	0.500387	1.41459	0.0375418
F22F4.2	0.498431	1.41268	0.0347463
2L52.1	0.493989	1.40833	0.0441226
T07C5.1	0.482052	1.39673	0.0308397
Y47D7A.1	0.472184	1.38721	0.0159742
R119.5	0.464163	1.37952	0.0492059
C34F11.9	0.447397	1.36358	0.0360127
B0416.6	0.44477	1.3611	0.0320549
R11B5.1	0.441586	1.3581	0.0487005
B0410.2	0.436854	1.35365	0.0308816
K02E10.2	0.434219	1.35118	0.0301436
F18H3.3	0.432136	1.34923	0.0476097
D2021.1	0.430462	1.34767	0.0364429
T07D3.7	0.355461	1.27939	0.0322966
C55B7.4	-0.330441	0.795293	0.0489046
C04F6.1	-0.358556	0.779945	0.0462609
Y38F1A.6	-0.362987	0.777553	0.0251971
ZK822.5	-0.376519	0.770294	0.0459657
R01E6.3	-0.377631	0.7697	0.0480454
F29G6.3	-0.378721	0.769119	0.018811
Y43C5A.2	-0.388547	0.763899	0.0476651
C09B8.4	-0.390127	0.763062	0.0440729
M02F4.8	-0.398209	0.758799	0.0334457
F49E2.5	-0.399839	0.757943	0.0279015
F57F5.1	-0.407104	0.754136	0.0219903
M03B6.2	-0.411982	0.75159	0.0356817
T07D3.9	-0.412134	0.751511	0.0396612
C17C3.12	-0.418631	0.748134	0.0339276
W08D2.4	-0.425019	0.744829	0.0278233
D1037.2	-0.434571	0.739914	0.0280903
Y40H7A.10	-0.437312	0.738509	0.036289
F55F3.3	-0.449263	0.732417	0.0139253
F55B11.2	-0.459802	0.727086	0.0416554
K08F8.1	-0.460128	0.726922	0.0393558
F08F3.3	-0.465565	0.724187	0.0421569
K08F8.4	-0.467087	0.723424	0.0321836
C46F4.2	-0.470714	0.721607	0.0459528
F28A12.4	-0.476427	0.718756	0.0144155
M01F1.5	-0.484242	0.714873	0.0462953
F18E3.7	-0.499545	0.70733	0.00949806
F21C10.10	-0.503109	0.705585	0.0181467
Y54G2A.11	-0.503988	0.705155	0.0189961
F18E2.1	-0.509186	0.702619	0.00464805
D1086.6	-0.512865	0.700829	0.00315274
R07B1.4	-0.516478	0.699076	0.0183156
Y102A11A.3	-0.517367	0.698646	0.012303
E03E2.1	-0.518553	0.698071	0.0315888
C08B6.1	-0.52246	0.696184	0.010497
ZK930.2	-0.524313	0.69529	0.0381141
C17C3.1	-0.528253	0.693394	0.0198863
W01B11.6	-0.533717	0.690773	0.0242311
T21C9.6	-0.534653	0.690324	0.0264226
F22A3.1	-0.536037	0.689663	0.0447865
K07C10.1	-0.539247	0.68813	0.0461756
F21D12.1	-0.54305	0.686319	0.0231122
Y16B4A.2	-0.543619	0.686048	0.00241213
F41E6.5	-0.54913	0.683432	0.0431772
F25F8.2	-0.552823	0.681685	0.0407653
C06B3.6	-0.553042	0.681581	0.00953832
K02D7.5	-0.559898	0.67835	0.0259869
K03H6.2	-0.562644	0.67706	0.0329713
ZC376.2	-0.564049	0.676401	0.0209695
C56E10.4	-0.564652	0.676118	0.0237257
F32A5.2	-0.565326	0.675803	0.0455304
T08A9.11	-0.566346	0.675325	0.0250791
T11F9.3	-0.566506	0.67525	0.0287863
Y119C1B.9	-0.568713	0.674218	0.049553
F32A5.5	-0.574638	0.671455	0.0195814
F46C5.10	-0.575691	0.670965	0.0420488
D2096.3	-0.579523	0.669185	0.038909
K10H10.2	-0.581372	0.668328	0.0294657
C09F9.3	-0.594037	0.662486	0.0474977
R06C7.3	-0.595523	0.661804	0.0271354
R10D12.1	-0.597005	0.661125	0.03987
F11F1.1	-0.597217	0.661028	0.0278507
F11A5.10	-0.599538	0.659965	0.0389544
F56F10.3	-0.60176	0.65895	0.0384691
F17C11.11	-0.606517	0.65678	0.00107331
R10F2.6	-0.606978	0.656571	0.0358786
R09H10.5	-0.610509	0.654966	0.0171819
F32D8.12	-0.610616	0.654917	0.00908097
F25E5.8	-0.612638	0.654	0.0031844
H23N18.1	-0.613994	0.653386	0.0484533
F19H8.1	-0.614403	0.6532	0.0210944
F01D4.2	-0.616611	0.652201	0.030378
C33A12.19	-0.620318	0.650527	0.0465952
C49C3.1	-0.620674	0.650367	0.0412504
R12C12.9	-0.620877	0.650276	0.0327595
ZK1037.6	-0.621372	0.650053	0.0352256
ZK550.6	-0.626486	0.647752	0.0206592
T13C5.5	-0.627267	0.647402	0.019555
C03E10.5	-0.627524	0.647286	0.0280365
DH11.3	-0.630598	0.645909	0.0170181
K11G12.1	-0.63277	0.644937	0.00789537
F47G6.4	-0.641726	0.640945	0.041171
T02G5.4	-0.642316	0.640684	0.001377
F46G10.4	-0.644414	0.639753	0.0307808
C53C7.5	-0.64937	0.637559	0.0479663
F59E11.11	-0.650008	0.637277	0.0346125
T08B1.6	-0.651317	0.636699	0.0368291
C34D10.2	-0.657221	0.634098	0.000788826
T05C3.6	-0.660264	0.632763	0.00821457
AC3.7	-0.668227	0.62928	0.0404781
F13G11.3	-0.681568	0.623487	0.0237503
B0457.2	-0.682329	0.623159	0.0132719
C28H8.11	-0.68337	0.622709	0.00180952
T21D12.9	-0.690431	0.619669	0.0156524
K09C4.5	-0.692805	0.61865	0.0141285
Y34B4A.5	-0.698516	0.616206	0.0276845
B0410.3	-0.701645	0.614871	0.0465353
ZK512.7	-0.710565	0.611081	0.0293456
F13H8.3	-0.711738	0.610584	0.0390389
F18E3.11	-0.714233	0.609529	0.0108393
ZC455.6	-0.714934	0.609233	0.0437601
T03E6.8	-0.715432	0.609023	0.0351423
B0393.9	-0.730195	0.602822	0.0368572
C30G7.1	-0.732175	0.601996	0.0246279
T12A7.6	-0.739231	0.599058	0.0187805
C06G8.1	-0.740433	0.59856	0.00110945
C04F5.7	-0.744118	0.597033	0.0192767
C39B5.5	-0.749875	0.594655	0.0234074
F08A8.2	-0.750674	0.594326	0.000279132
T14B4.4	-0.751077	0.59416	0.0475981
K08C7.1	-0.754676	0.59268	0.0305607
F08F1.4	-0.755045	0.592528	0.0114889
K09D9.2	-0.757719	0.591431	0.00267729
C10H11.6	-0.758624	0.59106	0.0134276
R07B7.5	-0.758807	0.590985	0.0241016
E01A2.10	-0.765991	0.588049	0.00676297
R08E3.2	-0.769758	0.586516	0.0272536
F14B8.3	-0.771921	0.585637	0.0207811
F44B9.1	-0.773406	0.585035	0.0386501
Y43B11AR.1	-0.77386	0.584851	0.03118
C35C5.8	-0.775292	0.58427	0.0390502
C06B3.3	-0.775584	0.584152	0.000118549
F55F3.2	-0.784271	0.580645	0.000949664
F14F9.4	-0.78649	0.579753	0.0487505
ZK563.6	-0.786723	0.579659	0.034005
C08A9.1	-0.789543	0.578527	0.0463212
C33D9.3	-0.789939	0.578369	0.011959
T20C7.2	-0.798548	0.574927	0.0373249
C34D1.4	-0.80568	0.572093	0.00912376
Y67A6A.2	-0.826561	0.563872	0.0392839
H23N18.3	-0.82939	0.562767	0.00751575
T05E7.1	-0.838262	0.559317	0.0160751
K06B4.11	-0.843854	0.557153	0.0108885
Y42A5A.3	-0.849752	0.55488	0.0367299
Y40B10A.2	-0.856521	0.552283	0.00845011
Y53C12A.2	-0.859643	0.551089	0.0436977
M176.6	-0.865724	0.548771	0.0495503
ZK856.5	-0.867756	0.547998	0.0170133
T21G5.6	-0.870379	0.547003	0.0311084
F54B11.11	-0.874996	0.545255	0.0163135
C05A9.1	-0.876682	0.544619	0.00664469
ZK1193.3	-0.893185	0.538424	0.02678
Y25C1A.14	-0.907256	0.533198	0.0290288
Y43C5B.3	-0.908742	0.532649	0.0301839
Y48E1B.8	-0.918575	0.529031	0.00777307
T02B5.3	-0.923836	0.527106	0.00408835
M176.7	-0.926453	0.52615	0.0417105
F16F9.2	-0.931256	0.524402	0.0467671
C14C11.1	-0.93703	0.522307	0.0267687
F20D6.5	-0.94405	0.519772	0.0461715
C40H1.7	-0.949611	0.517772	0.00214708
Y46H3B.2	-0.95232	0.516801	0.02373
C50F4.8	-0.958783	0.514491	0.0193131
F57F4.3	-0.9625	0.513167	3.75831e-07
C03G6.15	-0.979323	0.507218	3.5023e-05
F36A4.5	-0.982602	0.506066	0.0375857
C09H5.2	-0.998931	0.500371	0.000538088
F09C8.1	-1.00337	0.498834	0.0225799
Y32F6A.6	-1.01462	0.494958	0.0100231
F58A3.3	-1.0178	0.493869	0.0110688
T26A5.1	-1.03978	0.486402	0.035403
T22B7.7	-1.05771	0.480394	0.000552128
F07A5.2	-1.08357	0.471861	0.0450718
C30G12.2	-1.09336	0.468668	0.000266747
Y53F4B.19	-1.10099	0.466197	0.0363245
F54C8.1	-1.10135	0.46608	0.0272172
C14F5.2	-1.10681	0.46432	0.00433524
K08C7.2	-1.11578	0.461443	0.0020225
B0273.1	-1.12299	0.459141	0.0186781
T16A9.3	-1.12301	0.459135	0.00584729
F09B9.1	-1.14511	0.452156	0.00292839
C55A6.7	-1.15694	0.448464	0.0332015
T19H5.1	-1.1577	0.448228	0.01506
F55B11.5	-1.1579	0.448165	0.0156509
W06D4.2	-1.16755	0.445178	0.024111
C09G9.7	-1.16761	0.445159	0.00845628
C15C6.2	-1.1689	0.444761	0.0239874
T02G5.11	-1.17229	0.443717	0.000128776
D1046.4	-1.17585	0.442621	0.00787381
R155.2	-1.17759	0.442089	0.0392985
R09D1.10	-1.18891	0.438635	0.00675384
ZK1058.6	-1.19706	0.436163	0.00257767
T21E8.3	-1.20664	0.433276	0.0471965
C25H3.10	-1.21146	0.431833	0.000361683
Y32B12C.5	-1.21471	0.430861	0.0028571
C34F11.5	-1.221	0.428986	0.0417431
C01G12.8	-1.23616	0.4245	0.0231331
F47B8.11	-1.243	0.422493	0.0184864
C40A11.1	-1.24322	0.422429	0.0217853
C27D6.11	-1.24982	0.420501	0.0387153
Y6G8.2	-1.25749	0.418272	0.038931
F11D5.7	-1.25968	0.417637	0.00977877
F32B6.4	-1.26032	0.417451	0.043716
C03A7.11	-1.26036	0.41744	0.000516777
R04B5.3	-1.268	0.415234	0.0418376
C05B5.2	-1.26833	0.415139	0.0299472
F53F1.6	-1.27267	0.413894	0.0175836
K06A5.2	-1.27306	0.413782	0.00779412
F25D1.5	-1.27434	0.413415	5.16382e-06
Y48G1C.5	-1.28108	0.411487	0.0186614
W03F11.4	-1.29923	0.406344	0.0176624
W02B12.12	-1.31333	0.40239	0.0245893
K09F6.3	-1.31794	0.401107	0.0291942
ZK550.5	-1.33191	0.397241	0.0146395
C33F10.12	-1.33296	0.396952	0.0395981
F55H12.5	-1.33401	0.396663	0.0295911
C33F10.11	-1.33897	0.395303	0.0131806
F37A4.4	-1.35226	0.391679	0.00760378
ZK1251.1	-1.36457	0.388351	0.0152338
W02A2.8	-1.36493	0.388253	0.0289224
F53B6.4	-1.36545	0.388113	0.00449728
F36A2.10	-1.37832	0.384666	0.00945089
ZC116.2	-1.39543	0.380131	0.037729
C17H12.5	-1.40269	0.378223	0.0396095
K04G2.4	-1.41239	0.375688	0.0298007
F58A6.9	-1.42068	0.373537	0.0200128
C06A8.6	-1.42583	0.372205	0.0380856
F20H11.4	-1.42646	0.372044	0.00838483
Y37E11B.10	-1.43782	0.369124	0.0142441
F26B1.8	-1.43995	0.36858	0.00148246
ZK816.5	-1.4402	0.368517	0.0016251
T08B6.4	-1.44119	0.368264	0.0124662
F19C7.4	-1.44141	0.368207	0.0182124
T05A7.6	-1.4418	0.368108	0.0365302
C34D4.3	-1.44269	0.36788	0.0143725
F58A6.8	-1.44573	0.367107	0.0116008
C25G4.6	-1.46665	0.361821	0.00131136
Y25C1A.1	-1.47704	0.359226	0.0255154
C10G11.8	-1.47743	0.359128	0.00038144
F57B1.9	-1.48125	0.358178	0.00269738
T27C10.8	-1.48609	0.356978	0.0369032
F40G12.10	-1.48786	0.356542	0.0177911
F21H7.5	-1.48872	0.356328	0.000660268
Y106G6H.13	-1.48961	0.356109	0.000332964
ZK265.3	-1.4934	0.355174	0.00354215
C35D10.2	-1.49459	0.354883	0.000157609
C09B9.4	-1.50148	0.353192	0.0190909
F49E11.10	-1.51184	0.350664	0.000622132
F36A2.14	-1.51188	0.350655	0.0140306
C04G2.8	-1.51454	0.350007	0.0152762
R07B7.15	-1.51989	0.348712	0.0406323
T23G11.1	-1.52	0.348686	0.00232284
Y69A2AR.19	-1.52014	0.348653	0.0157438
F54D1.1	-1.52502	0.347474	0.0162151
F46F5.6	-1.52559	0.347337	0.0326382
F52H3.6	-1.52637	0.347151	0.0099202
Y57G7A.6	-1.52665	0.347083	0.00108304
B0261.6	-1.53293	0.345575	0.00613195
ZK858.8	-1.534	0.345319	0.0143397
T08B2.12	-1.53807	0.344347	0.0178657
R10E9.2	-1.53846	0.344252	0.000542318
F29C4.4	-1.53961	0.34398	0.0466311
F08H9.5	-1.54482	0.342738	0.018824
C33F10.1	-1.54508	0.342676	0.00489907
ZK1248.6	-1.5535	0.340683	0.00758381
F57H12.5	-1.56515	0.337942	0.015116
T22C1.8	-1.56644	0.33764	0.00881534
W01C9.4	-1.56729	0.337441	0.0272946
Y46G5A.30	-1.56766	0.337355	0.00512174
R09E10.1	-1.56882	0.337085	0.0216402
T27E7.1	-1.595	0.331022	0.0100957
W03D8.9	-1.59777	0.330388	0.00198909
Y59E9AL.3	-1.60255	0.329294	0.00177122
ZK945.7	-1.6039	0.328987	0.000355056
C14A6.13	-1.60508	0.328716	0.0397021
R148.7	-1.60876	0.327879	0.0169742
W02B12.7	-1.61252	0.327026	0.0311504
C14C10.1	-1.61558	0.326334	0.00556621
T03F1.5	-1.61578	0.326289	0.00192011
R07E5.15	-1.61872	0.325624	0.0231772
F41H10.2	-1.62234	0.324809	0.000376448
F07F6.1	-1.62898	0.323316	0.0391203
Y106G6A.4	-1.6336	0.322283	0.044991
F44D12.4	-1.63383	0.322232	0.000173754
C17H12.3	-1.63663	0.321608	0.0122018
Y44A6D.5	-1.63763	0.321384	0.0415563
F41G3.5	-1.63968	0.320928	0.0249429
R11G11.14	-1.6398	0.320902	0.0442349
C18H7.4	-1.64381	0.320009	0.0246686
Y106G6G.4	-1.64721	0.319257	0.00233039
H05L14.1	-1.64748	0.319198	0.0157955
F36A4.4	-1.64975	0.318695	0.0258692
C17G10.3	-1.65119	0.318378	0.0251048
ZK1225.6	-1.66694	0.31492	0.0437056
C28D4.7	-1.66851	0.314578	0.0172945
C27D6.3	-1.67169	0.313885	0.0492718
H27M09.5	-1.67986	0.312113	0.0370717
C48E7.7	-1.6925	0.309391	0.00522511
K05F1.3	-1.69262	0.309364	0.00544272
M70.3	-1.6927	0.309347	0.00982609
T13H10.1	-1.69387	0.309096	0.017214
R05F9.8	-1.69413	0.309041	0.000461417
K09C4.1	-1.69526	0.308799	0.00245243
T22B3.2	-1.69752	0.308316	0.00232823
Y106G6D.3	-1.69936	0.307924	0.000191213
F27C8.5	-1.70234	0.307286	0.0223577
C10G11.9	-1.70278	0.307193	0.0114075
C03C11.1	-1.70338	0.307066	0.0398753
T25B9.6	-1.70841	0.305997	0.00690823
F02E9.3	-1.71004	0.305652	0.00252387
C50F4.2	-1.71391	0.304832	0.0399034
ZC317.6	-1.71767	0.30404	0.00255869
T03F6.6	-1.72044	0.303456	0.000680502
ZK484.5	-1.72288	0.302944	0.000520194
F56A4.2	-1.72407	0.302694	0.0109201
K09E4.1	-1.72673	0.302136	0.00534062
F26G1.7	-1.73102	0.301238	0.00851106
F10E9.1	-1.73532	0.300342	0.0373145
F17C8.7	-1.73652	0.300093	0.0429447
ZK354.5	-1.73678	0.300038	0.00086877
ZK637.12	-1.74104	0.299154	0.0181585
F18A12.4	-1.74862	0.297586	0.0341142
W01B6.2	-1.74928	0.297451	0.00928262
F10D7.4	-1.75682	0.295901	0.0482803
T21G5.4	-1.75982	0.295286	0.000262
ZC477.7	-1.7614	0.294962	0.0164094
F34H10.5	-1.76195	0.29485	0.0487025
BE10.1	-1.76631	0.293959	0.0451721
R13A1.9	-1.7677	0.293676	0.0330053
C17H12.12	-1.77161	0.292881	0.000702788
M70.1	-1.77389	0.29242	0.0317328
B0491.3	-1.77435	0.292327	0.000525759
ZK1053.2	-1.77606	0.29198	0.0085077
T13F2.11	-1.77633	0.291925	0.00247375
B0205.10	-1.77849	0.291488	0.00249884
C34F11.2	-1.78424	0.290329	0.0221934
ZK757.3	-1.78931	0.289311	0.00208212
T28H11.7	-1.79101	0.288969	0.00432795
ZC168.6	-1.79119	0.288934	0.0362653
K07F5.2	-1.79435	0.288301	0.00123989
F20D6.6	-1.79451	0.288269	0.0122857
R13H9.4	-1.79575	0.288023	0.000302431
F14E5.3	-1.79575	0.288021	0.0303091
Y105C5B.18	-1.799	0.287374	0.0281136
C33F10.9	-1.8012	0.286935	0.000165905
R10H10.2	-1.80261	0.286655	0.00741048
Y38C1AA.7	-1.80332	0.286513	0.000487874
T10E9.4	-1.80354	0.28647	5.40736e-05
Y37D8A.5	-1.81221	0.284755	0.0393862
Y39B6A.30	-1.81482	0.284239	0.0133184
C48E7.8	-1.81893	0.283431	0.0122066
F37C12.18	-1.86104	0.275278	0.048684
F17E9.5	-1.86472	0.274577	9.15658e-05
F32B6.6	-1.8678	0.273992	5.03799e-06
T02E1.6	-1.8719	0.273214	0.0246032
B0379.7	-1.87511	0.272607	0.00052068
F10F2.7	-1.88565	0.270622	0.0148652
F36D3.4	-1.88666	0.270433	5.57625e-05
ZK546.6	-1.88785	0.270209	0.00104043
R05F9.13	-1.88822	0.270139	0.000195823
T28H11.5	-1.88866	0.270058	0.0464135
W09C3.6	-1.8895	0.2699	0.000217236
F32B6.5	-1.89892	0.268143	0.000796756
D1086.17	-1.89966	0.268007	0.00166823
C04F12.7	-1.90189	0.267592	8.34093e-05
T16A9.5	-1.90586	0.266856	0.00171982
Y43F8A.2	-1.90739	0.266574	0.000538848
M162.7	-1.91132	0.265849	0.00763093
C02F5.5	-1.91242	0.265647	0.00121524
K07F5.9	-1.91392	0.26537	0.000639622
R09E10.6	-1.91394	0.265366	0.000305924
F02E11.1	-1.9142	0.265318	0.0267188
Y46G5A.14	-1.9156	0.265062	0.0153567
C04G2.9	-1.92105	0.264061	0.000164497
W09D6.4	-1.92539	0.26327	0.00514263
K07F5.3	-1.92696	0.262984	0.000546871
B0218.7	-1.93225	0.26202	0.0036849
T27A3.4	-1.93428	0.261652	0.00613108
F47B3.7	-1.93582	0.261372	0.00642516
F21D9.2	-1.93619	0.261306	0.0299658
F13D2.3	-1.93685	0.261187	0.0308259
F55C5.1	-1.94553	0.25962	0.000809202
C34F11.6	-1.9515	0.258548	0.00171158
F49C12.15	-1.95315	0.258251	0.000114397
Y43F8C.5	-1.95692	0.257577	0.0078959
ZK354.7	-1.96564	0.256025	0.00815517
F40H6.1	-1.9665	0.255873	0.0292777
R09E10.3	-1.96672	0.255833	0.00557522
F56F3.4	-1.96838	0.25554	0.00359076
ZK354.4	-1.96912	0.255409	0.00159259
T05F1.5	-1.96998	0.255257	0.000344921
C27D8.1	-1.97313	0.254699	0.00357567
ZK1251.6	-1.97561	0.254262	3.62936e-06
F02C9.4	-1.97763	0.253906	0.0138039
F27C1.1	-1.98196	0.253145	0.00013541
Y59E9AL.6	-1.98329	0.252913	0.00198666
T28B8.4	-1.99238	0.251323	0.0091725
F57F4.1	-1.99283	0.251246	0.000456436
Y76A2A.1	-1.99447	0.250961	0.00178959
F42A9.7	-1.99752	0.250429	0.0119858
F46B6.8	-2.0024	0.249585	0.00857918
C37A2.3	-2.00389	0.249327	0.00773709
C15H7.3	-2.00532	0.24908	0.0338942
K04H4.5	-2.00574	0.249006	0.000201518
Y69E1A.2	-2.01296	0.247765	0.000538068
ZK1307.4	-2.01337	0.247693	0.000506029
T13F2.10	-2.01596	0.247249	9.42399e-05
ZK938.1	-2.02108	0.246373	1.97246e-05
ZK596.2	-2.023	0.246046	0.0142372
C45G9.9	-2.02432	0.245821	0.000827252
F01D4.1	-2.02463	0.245768	0.0124229
C04G2.4	-2.03036	0.244794	0.000107058
B0252.5	-2.04178	0.242864	0.00357593
ZK892.3	-2.06035	0.239758	0.0255105
E03H12.5	-2.06298	0.239321	0.00139397
T22B3.3	-2.06437	0.239091	0.00151386
ZK354.11	-2.07399	0.237501	2.82863e-05
ZK402.5	-2.07677	0.237045	0.0425187
C35D10.11	-2.07806	0.236832	0.00148043
F52F12.5	-2.07921	0.236644	0.0472963
C34F11.4	-2.08241	0.23612	0.000452538
F44F1.3	-2.08657	0.235439	0.0346998
D1081.12	-2.0906	0.234783	0.0199102
F13A7.1	-2.09304	0.234386	0.0112344
Y69E1A.3	-2.09346	0.234318	0.0398033
K03H1.1	-2.09803	0.233577	0.000133594
D2030.7	-2.10008	0.233246	3.005e-12
F42C5.5	-2.10208	0.232922	0.00736222
F36H12.7	-2.10492	0.232464	0.0254654
E03H12.7	-2.11781	0.230397	0.018804
K07F5.1	-2.11954	0.23012	1.91274e-06
Y69E1A.1	-2.1251	0.229236	0.000177679
K08F4.8	-2.13113	0.228279	0.00147834
B0025.5	-2.13316	0.227959	0.000141183
F33D11.7	-2.13334	0.227929	0.0158685
K05F1.9	-2.13409	0.227811	0.0225723
F18C5.4	-2.14329	0.226363	0.0107251
F40F9.3	-2.15624	0.22434	0.000991761
F47C12.4	-2.15897	0.223916	0.00227911
K07A3.3	-2.18235	0.220316	0.0020466
C28D4.5	-2.18533	0.219862	0.0125709
M28.9	-2.19315	0.218673	0.000135382
F44D12.5	-2.19747	0.21802	1.06556e-05
C30B5.3	-2.19893	0.217799	0.038362
Y34F4.6	-2.20152	0.217409	0.0286306
C39H7.1	-2.22659	0.213664	7.34609e-07
F08H9.2	-2.244	0.211101	0.00076471
T27C10.7	-2.25595	0.209359	0.00526091
C55C3.4	-2.26005	0.208765	0.0123469
F32H2.7	-2.26639	0.207849	2.04298e-05
C48B6.4	-2.28565	0.205093	0.000362119
F28H7.10	-2.28641	0.204984	0.0465881
C32E12.1	-2.29902	0.203202	0.00550776
C43F9.6	-2.30102	0.20292	0.00490171
F11A5.12	-2.30566	0.202269	0.019916
F54F7.9	-2.31285	0.201263	0.0301408
K06H7.8	-2.31498	0.200966	0.042677
R102.10	-2.31761	0.200599	0.0203126
K01H12.4	-2.32122	0.200099	2.62619e-05
C09B9.6	-2.32454	0.199638	3.79577e-05
C50F4.10	-2.32707	0.199289	0.00169853
T28H11.6	-2.33178	0.198638	0.0296251
Y57G11B.8	-2.34975	0.196179	0.0229029
W03F11.3	-2.35844	0.195002	0.0414271
E03A3.4	-2.35883	0.194949	0.0143248
T04B2.7	-2.36217	0.194498	0.00457152
Y60A3A.15	-2.39935	0.18955	0.018405
F55B11.7	-2.40602	0.188675	0.0159729
T16G1.5	-2.42839	0.185773	0.0467397
F54C1.8	-2.44924	0.183107	0.0377959
F36A2.12	-2.45213	0.18274	0.00202809
ZK354.1	-2.46042	0.181694	0.000203663
ZK892.5	-2.46745	0.18081	0.00530867
R08A2.3	-2.47812	0.179478	0.00902119
T06A4.2	-2.56248	0.169285	0.0325586
C24D10.2	-2.57574	0.167735	0.0109405
Y54G2A.13	-2.59452	0.165566	0.000117442
F59C6.3	-2.6149	0.163243	0.0449177
Y71G12B.22	-2.6198	0.162691	0.0170487
Y76G2A.1	-2.64019	0.160407	0.00379098
ZC477.1	-2.69137	0.154817	0.000145259
AH6.3	-2.6981	0.154096	0.0417778
M05B5.1	-2.75135	0.148512	0.000316237
K06A1.2	-2.77916	0.145677	0.0259266
Y116A8A.8	-2.79304	0.144282	0.041333
T24A6.17	-2.80545	0.143046	2.80622e-05
C15H11.1	-2.93963	0.130342	0.0144283
C36B7.8	-2.94049	0.130264	0.0301439
Y59E9AR.1	-2.94703	0.129674	0.0159729
C53D6.10	-2.96396	0.128162	0.00972921
F36D3.5	-2.98987	0.125881	0.00161551
W01B6.6	-3.02834	0.122569	0.0174403
M02B1.4	-3.11157	0.115698	6.7277e-05
R13H9.1	-3.17803	0.110489	0.00024648
T20F10.9	-3.18876	0.10967	0.0255841
ZK131.4	-3.22004	0.107317	0.0471553
M110.7	-3.24755	0.105291	0.0106356
Y51B9A.5	-3.29878	0.101618	0.028838
R07E5.6	-3.44722	0.0916822	0.000362668
T21G5.1	-3.48178	0.0895114	0.000208416
T04F3.3	-3.48785	0.0891359	0.000278579
Y57G11C.23	-3.52671	0.0867672	0.000785687
C06C6.7	-3.53695	0.0861532	0.0248556
Y59E9AL.2	-3.64137	0.0801377	0.000248527
F56B3.15	-3.72379	0.0756878	0.0409531
C38C10.3	-3.75231	0.0742063	0.0118217
F36D1.3	-3.75875	0.0738759	0.0400418
Y44A6B.4	-3.77346	0.0731265	0.0360828
Y37A1B.318	-3.82684	0.0704703	0.037948
ZK666.10	-3.8442	0.0696275	0.0349535
K05F1.7	-3.91638	0.0662297	0.0302041
ZK354.10	-3.93172	0.0655289	0.0384702
F28E10.5	-3.9559	0.0644399	0.0243741
F35H8.1	-4.25929	0.0522187	0.0307749
Y37E11AR.7	-4.53418	0.0431596	0.0256678
F14E5.8	-4.59077	0.0414993	0.00410355
F37C4.2	-4.78468	0.03628	0.0144762
Y73F8A.12	-5.07307	0.0297067	0.0065838
F11G11.13	-5.15111	0.0281425	0.00432014
B0213.12	-5.47185	0.0225325	0.000964911
F54H5.2	-5.5846	0.0208386	0.00114915
B0213.11	-6.14365	0.0141441	6.37124e-05
B0213.10	-7.17333	0.00692808	1.21788e-07
B0213.16	-8.19501	0.00341238	2.20759e-10
K07C6.5	-9.45123	0.00142856	1.5095e-14
T09H2.1	-9.49034	0.00139035	2.59051e-14
B0213.15	-10.4422	0.000718775	7.21414e-18
B0213.14	-10.7826	0.000567689	5.96198e-19

## Sheet: SHeet 4
fmo-4 KO	Log2Fc/N2	Fc/N2	pvalue	padj	Gene Name	Concise Description	Notes		fmo-4 OE	Log2Fc/N2	Fc/N2	pval	padj	Gene Name	Concise Description	Notes
H39E23.3	6.95782	124.312	1.58546e-05	0.00453326	H39E23.3	N.A.			C03A7.14	6.95253	123.857	1.57893e-05	0.00760481	abu-8	abu-8 encodes a transmembrane protein with a predicted signal sequence, a glutamine\/asparagine-rich domain and multiple cysteine-rich repeats (DUF139)\; abu-8 expression is induced by blockage of the unfolded-protein response in the endoplasmic reticulum, and ABU-8 may help protect the organism from damage by improperly folded nascent protein.
ZK546.7	6.24322	75.7523	0.000214943	0.0222121	ZK546.7	N.A.			T25E4.1	6.01187	64.5289	0.000353111	1	T25E4.1	N.A.
F48C1.9	6.10036	68.6108	2.31984e-12	6.08029e-09	F48C1.9	N.A.			T06E4.9	5.63854	49.816	0.0047808	1	T06E4.9	N.A.
D1081.3	5.96258	62.3612	0.000368341	0.0292297	D1081.3	N.A.			T18H9.1	5.41139	42.5591	0.00271971	1	grd-6	grd-6 encodes a hedgehog-like protein, with an N-terminal signalsequence, a central low-complexity proline-rich domain, and a C-terminalGround domain\; GRD-6 is expressed in hypodermis and in various neurons,in both head and tail, and the PVT interneuron\; the Ground domain ispredicted to form a cysteine-crosslinked protein involved inintercellular signalling, and it has subtle similarity to the …
ZK783.6	5.9048	59.9131	5.67785e-05	0.00875391	ZK783.6	N.A.			C03A7.4	5.10797	34.4866	0.0186045	1	abu-15	The protein product of this gene is predicted to contain a glutamine\/asparagine (Q\/N)-rich ('prion') domain, by the algorithm of Michelitsch and Weissman (as of the WS77 release of WormBase, i.e., in wormpep77).
Y32G9A.3	5.79759	55.6222	0.000459044	0.0328986	Y32G9A.3	N.A.			F22F7.6	5.09901	34.2733	0.0185231	1	bgnt-1.2	N.A.
C17B7.10	5.71635	52.5766	0.000733713	0.0434679	C17B7.10	C17B7.10 encodes a neprilysin\; neprilysins are thermolysin-like zinc metallopeptidases, found on the outer surface of animal cells, that negatively regulate small signalling peptides (e.g., enkephalin, tachykinin, insulin, and natriuretic peptides) by cleaving them\; C17B7.10 has no clear orthologs in other organisms.			K10C2.5	5.08476	33.9364	0.0048173	1	grl-6	grl-6 encodes a hedgehog-like protein, with an N-terminal signalsequence, a central proline-rich low-complexity region, and a C-terminalGround-like (Grl) domain\; GRL-6 is expressed in larval intestine, amphidsocket cells, and neurons\; the Grl domain is predicted to form acysteine-crosslinked protein involved in intercellular signalling, andit has subtle similarity to the N-terminal Hedge domain…
Y38F1A.7	5.5476	46.7729	0.000312963	0.027042	Y38F1A.7	N.A.			T01D3.2	5.06009	33.3609	0.00630763	1	hlh-34	N.A.
C12D8.14	5.50347	45.3639	0.00284973	0.0889184	fipr-4	N.A.			C12D8.14	4.95864	31.0957	0.0268625	1	fipr-4	N.A.
ZC168.5	5.47504	44.4786	2.84105e-05	0.00645557	grl-21	grl-21 encodes a hedgehog-like protein, with an N-terminal signalsequence, a central proline-rich low-complexity region, and a C-terminalGround-like (Grl) domain\; GRL-21 is expressed in arcade cells andhypodermis\; the Grl domain is predicted to form a cysteine-crosslinkedprotein involved in intercellular signalling, and it has subtlesimilarity to the N-terminal Hedge domain of HEDGEHOG proteins.			W03D2.9	4.82066	28.2593	0.0122713	1	W03D2.9	N.A.
Y51A2B.4	5.4699	44.3204	0.000417118	0.0319092	Y51A2B.4	N.A.			K01D12.1	4.80478	27.9502	0.000269729	0.0386974	K01D12.1	N.A.
Y39A3B.7	5.46512	44.1739	0.00943977	0.18441	Y39A3B.7	N.A.			Y57G11A.207	4.78987	27.6628	0.0384356	1	21ur-9869	N.A.
F37C4.8	5.44972	43.7048	0.00303131	0.0925638	F37C4.8	N.A.			F43G6.16	4.78775	27.6221	0.0371405	1	F43G6.16	N.A.
ZC513.10	5.44428	43.5403	0.00326324	0.0966042	fbxa-223	fbxa-223 encodes a protein containing an F-box, a motif predicted to mediate protein-protein interactions either with homologs of yeast Skp-1p or with other proteins\; FBXA-223 also contains an FTH\/DUF38 motif, which may also mediate protein-protein interaction.			T06E4.14	4.66914	25.442	0.00545944	1	T06E4.14	N.A.
C38C3.7	5.19852	36.7208	0.00111111	0.0551211	not found				W04E12.9	4.53993	23.2625	0.0102676	1	W04E12.9	N.A.
F56H1.2	5.18392	36.351	0.00934675	1	nhr-266	N.A.			AC3.4	4.53989	23.2618	0.0103986	1	pqn-2	The protein product of this gene is predicted to contain a glutamine\/asparagine (Q\/N)-rich ('prion') domain, by the algorithm of Michelitsch and Weissman (as of the WS77 release of WormBase, i.e., in wormpep77).
C45B2.2	5.12782	34.9646	0.000488385	0.0338827	C45B2.2	N.A.			C03A7.7	4.46566	22.0952	0.0206689	1	abu-6	abu-6 encodes a transmembrane protein with a predicted signal sequence, a glutamine\/asparagine-rich domain and multiple cysteine-rich repeats (DUF139)\; abu-6 is a member of a paralogous group of genes whose expression is transcriptionally up-regulated during times of cuticle synthesis, such as during late embryogenesis and during the molts\; abu-6 expression is induced by blockage of the unfold…
C03A7.14	5.06962	33.582	0.0120432	1	abu-8	abu-8 encodes a transmembrane protein with a predicted signal sequence, a glutamine\/asparagine-rich domain and multiple cysteine-rich repeats (DUF139)\; abu-8 expression is induced by blockage of the unfolded-protein response in the endoplasmic reticulum, and ABU-8 may help protect the organism from damage by improperly folded nascent protein.			T16G1.8	4.43513	21.6325	0.0291694	1	grl-2	grl-2 encodes a hedgehog-like protein, with an N-terminal signalsequence, a central proline-rich low-complexity region, and a C-terminalGround-like (Grl) domain\; GRL-2 is expressed in neurons, amphid socketcells, and other cells\; the Grl domain is predicted to form acysteine-crosslinked protein involved in intercellular signalling, andit has subtle similarity to the N-terminal Hedge domain of H…
T25E12.16	5.00234	32.0519	0.00999148	1	T25E12.16	N.A.			Y110A2AL.1	4.43499	21.6304	0.00930196	1	Y110A2AL.1	N.A.
R06B9.2	4.99771	31.9492	0.0095627	1	arrd-12	N.A.			Y6G8.1	4.40911	21.2459	0.034959	1	srz-45	N.A.
K08H2.5	4.95121	30.936	0.0026889	0.0871868	K08H2.5	N.A.			F38A1.7	4.38167	20.8456	0.0430279	1	clec-168	N.A.
B0213.17	4.9268	30.4168	1.20228e-10	2.36337e-07	nlp-34	N.A.			C05G5.6	4.34427	20.3121	0.0390181	1	let-7	let-7 encodes a 21-nucleotide microRNA (also known as a small temporal RNA, or stRNA) that is conserved in bilateral animal species (including vertebrates, ascidians, hemichordates, molluscs, annelids and arthropods), but is not found in cnidarians, poriferans, fungi, plants, protists, archaea, or bacteria\; let-7 is required for the transition from late larval to adult cell fates, and for larval…
K08H10.5	4.91918	30.2567	0.0133622	1	K08H10.5	N.A.			ZK1010.6	4.31972	19.9694	0.0390315	1	ZK1010.6	N.A.
C18D11.6	4.73302	26.5939	0.000340431	0.0277813	C18D11.6	N.A.			Y46G5A.39	4.21141	18.5251	0.0493543	1	Y46G5A.39	N.A.
C10G8.3	4.72739	26.4903	0.0235576	1	C10G8.3	N.A.			F39E9.14	4.20949	18.5005	0.0119828	1	F39E9.14	N.A.
F10D11.4	4.69058	25.8228	0.00441161	0.116993	F10D11.4	N.A.			C44B11.1	4.1628	17.9113	0.0216555	1	C44B11.1	N.A.
C24H11.1	4.63024	24.7651	0.0324368	1	C24H11.1	N.A.			F33A8.9	4.13782	17.6038	0.0148481	1	col-83	N.A.
Y50E8A.10	4.60909	24.4048	0.00347956	0.100403	Y50E8A.10	N.A.			F33E2.3	4.11093	17.2788	0.0171396	1	clec-102	N.A.
C47E12.12	4.60675	24.3652	0.00804308	0.167309	C47E12.12	N.A.			R03C1.1	4.10296	17.1836	0.0196148	1	R03C1.1	N.A.
C53B4.1	4.59584	24.1817	0.00653156	0.149079	suex-2	N.A.			C02E7.6	4.04362	16.4911	0.0268882	0.43636	C02E7.6	N.A.
Y22D7AR.12	4.58788	24.0487	4.66937e-05	0.00777816	Y22D7AR.12	N.A.			D1007.1	4.04139	16.4657	0.020329	1	ceh-17	ceh-17 encodes a phox-2-like homeodomain protein that is a member of the Q50 paired-like class of homeobox proteins and the vertebrate orthologue of Phox2a and Phox2b\; that affects ALA and SIA axonal development\; ceh-17 affects ALA and SIA antero-posterior axonal growth and navigation, and is expressed in five neurons of the ring ganglia (ALA and the 4 SIAs) with strongest expression in embryos…
F46C5.7	4.555	23.5067	0.0358766	1	F46C5.7	N.A.			Y69A2AL.1	4.02162	16.2416	0.00440917	1	grd-16	N.A.
F09E8.1	4.54792	23.3917	0.00755383	0.161901	spe-43	N.A.			C08E3.3	3.99945	15.994	0.0328635	1	bath-33	N.A.
F10F2.5	4.54769	23.3879	0.00921342	0.181548	clec-154	N.A.			Y105C5B.14	3.98174	15.7987	0.00476679	1	Y105C5B.14	N.A.
T25C8.3	4.54585	23.3581	0.00273981	0.0872193	gln-4	N.A.			R186.2	3.93719	15.3184	0.0252608	1	srd-35	N.A.
ZK1248.20	4.53786	23.229	0.00843107	0.172892	ZK1248.20	N.A.			Y45F3A.8	3.89004	14.8258	0.0267171	1	Y45F3A.8	N.A.
K01D12.1	4.52395	23.0062	0.00138484	0.0621985	K01D12.1	N.A.			F49D11.6	3.84091	14.3295	0.0279725	1	F49D11.6	N.A.
T22C8.1	4.51282	22.8294	0.0407635	1	T22C8.1	N.A.			F56H6.2	3.8331	14.2521	0.043567	1	F56H6.2	N.A.
T25B9.2	4.48723	22.428	0.047204	1	T25B9.2	N.A.			F18C5.9	3.77395	13.6796	0.0110786	1	F18C5.9	N.A.
ZC513.14	4.45385	21.9151	3.77379e-08	3.95554e-05	ZC513.14	N.A.			C46E10.5	3.77114	13.6529	0.000356333	1	fbxc-53	N.A.
C54C6.11	4.39439	21.0302	0.0112487	0.206468	C54C6.11	N.A.			F33H12.7	3.7468	13.4246	0.0482697	1	F33H12.7	N.A.
Y110A2AL.1	4.38524	20.8972	0.0112516	0.206468	Y110A2AL.1	N.A.			Y82E9BR.20	3.7272	13.2434	0.0402841	1	Y82E9BR.20	N.A.
F49D11.2	4.36377	20.5885	0.048756	1	F49D11.2	N.A.			F08H9.4	3.68967	12.9033	0.0421648	1	F08H9.4	F08H9.4 encodes a heat shock protein (HSP) of the HSP16 class\; unlike most HSP16s in C. elegans, it is specifically expressed in a particular tissue (the excretory canal and ventral nerve-cord neurons), and its expression is only mildly induced by heat shock\; however, F08H9.4 expression is increased by heat shock, is induced in a new tissue type (intestine) by heat shock, and probably aids heat…
F57H12.6	4.28615	19.5101	3.01347e-13	1.39619e-09	F57H12.6	N.A.			F17B5.6	3.67032	12.7314	0.0467866	1	F17B5.6	N.A.
ZK783.5	4.28268	19.4632	0.0255593	0.337203	not found				C24A8.6	3.6394	12.4615	0.0426707	0.545158	C24A8.6	N.A.
ZK1290.7	4.28159	19.4486	0.0281163	0.360356	ZK1290.7	N.A.			F55C5.11	3.62117	12.305	0.0495862	1	bnc-1	N.A.
C47A4.4	4.27557	19.3675	0.020066	0.291969	C47A4.4	N.A.			F56A3.5	3.61546	12.2563	0.00160581	1	bro-1	bro-1 encodes an ortholog of human CBFB (OMIM:121360, mutated in acute myeloid leukemia and CBFB haploinsufficiency) and Drosophila BRO\/BGB\; BRO-1 is required for the normal proliferation and differentiation of seam cells, alae, and male tail rays\; bro-1 mutants exhibit defective seam cell division and differentiation, and males exhibit ray loss\; conversely, transgenic overexpression of BRO-1…
Y23H5B.2	4.25623	19.1096	0.0251708	0.333338	Y23H5B.2	N.A.			Y59E1A.2	3.54599	11.6802	0.00345646	0.145668	rgs-8.2	N.A.
F28A10.4	4.25173	19.0501	0.0161972	0.256771	F28A10.4	N.A.			Y57G11C.39	3.54076	11.6379	0.0183463	1	Y57G11C.39	N.A.
F33H12.7	4.23476	18.8274	0.016962	0.262285	F33H12.7	N.A.			Y47D3B.6	3.51966	11.4689	1.72967e-05	0.00804357	Y47D3B.6	N.A.
F28A10.1	4.2224	18.6667	0.0379139	0.423462	F28A10.1	F28A10.1 encodes a putative small-molecule methyltransferase, belongingto a large nematode-specific expanded family\; F28A10.1 inhibits CEP-1-and HUS-1-dependent germline apoptosis, as do BMK-1, RAD-50, and RAD-51\;F28A10.1 is expressed in neurons, and F28A10.1 transcripts are enrichedin spermatogenesis\; although F's obvious homologs are all Caenorhabditisproteins, it has distant similarity to 3…			T06E4.12	3.49499	11.2745	0.0325803	1	T06E4.12	N.A.
F46F5.14	4.2115	18.5263	0.00472428	0.121838	F46F5.14	N.A.			T05A7.3	3.4917	11.2488	0.0177982	1	T05A7.3	N.A.
Y60A3A.2	4.18666	18.21	0.0181319	1	clec-260	N.A.			F41F3.3	3.46201	11.0197	0.00489508	0.180121	F41F3.3	N.A.
T04A8.3	4.17484	18.0615	0.00601945	0.142994	clec-155	N.A.			F35D2.2	3.32754	10.0389	0.0130657	1	F35D2.2	N.A.
R09B5.3	4.16385	17.9244	2.23971e-06	0.00125791	cnc-2	cnc-2 encodes one of eleven C. elegans caenacin peptides\; cnc-2 functions as a secreted antimicrobial peptide in the innate immune response: cnc-2 expression is strongly induced in the epidermis upon infection by the fungal pathogen and overexpression of cnc-2 promotes survival after D. coniospora infection\; cnc-2 expression is also induced upon infection by the Gram negative bacterium Serratia…			F43E2.9	3.304	9.87648	0.00995683	1	not found
C25H3.16	4.14676	17.7133	0.027248	1	C25H3.16	N.A.			B0222.7	3.30216	9.86391	0.00216333	0.110116	col-145	N.A.
Y46E12A.1	4.14187	17.6533	0.02175	0.308422	cnc-6	cnc-6 encodes one of eleven C. elegans caenacin peptides\; cnc-6 expression is strongly induced after infection by the fungus Drechmeria coniospora, suggesting that it functions as a secreted antimicrobial peptide in the innate immune response.			Y38A10A.11	3.30184	9.86172	0.0464873	1	Y38A10A.11	N.A.
F38A5.11	4.12879	17.4941	0.0066247	0.150052	irld-7	N.A.			C01B12.1	3.24636	9.48969	0.0148386	0.317641	sqt-2	N.A.
R09E10.2	4.11202	17.2919	4.02446e-08	3.95554e-05	R09E10.2	N.A.			C02E7.7	3.18461	9.09206	0.000905363	0.0682108	C02E7.7	N.A.
C04E6.4	4.10244	17.1774	0.00381752	0.10669	C04E6.4	N.A.			D2096.6	3.05443	8.30758	0.00247174	0.119147	D2096.6	N.A.
ZK970.7	4.03495	16.3924	4.80769e-09	7.56058e-06	ZK970.7	ZK970.7 encodes, along with C06A8.3, one of two C. elegans proteins with similarity to the Onchocerca volvulus Ov17 hypodermal antigen\; ZK970.7 expression increases in lin-35\; slr-2 doubly mutant animals and in response to stressors such as ionizing radiation and bacterial infection.			F33D4.6	3.02293	8.12818	0.00321813	0.138657	F33D4.6	N.A.
F56G4.7	4.0168	16.1874	0.00864507	0.174971	F56G4.7	N.A.			F09F9.2	3.01015	8.05646	0.000891921	0.0675756	F09F9.2	N.A.
Y1A5A.1	4.0119	16.1325	4.36645e-06	0.00185586	Y1A5A.1	N.A.			ZK616.9	2.98916	7.94013	0.0221787	1	spp-7	spp-7 encodes an antimicrobial peptide that belongs to the SPP-protein family, called caenopores, with structural similarity to saposin-like proteins (SAPLIPs), the amoebapores and the mammalian NK-lysin and granulysin\; caenopores are part of the worm's innate immune system and interact with and eliminate bacteria via membrane pore-forming activity\; C. elegans has at least 33 putative SPP prote…
F53B6.9	3.99461	15.9403	5.77105e-06	0.00226889	fip-6	N.A.			F35E12.2	2.96355	7.80044	0.00829561	1	F35E12.2	N.A.
F33A8.9	3.98803	15.8678	0.0373968	1	col-83	N.A.			H36L18.1	2.93497	7.64741	0.00362574	1	zmp-5	N.A.
ZK1251.5	3.98481	15.8324	0.00362492	0.103458	ZK1251.5	N.A.			ZK662.2	2.90711	7.50113	0.00339572	0.144463	ZK662.2	N.A.
C15H11.13	3.96065	15.5695	0.0428421	1	C15H11.13	N.A.			F58H1.2	2.89451	7.43591	0.00466304	0.174683	F58H1.2	N.A.
F12A10.7	3.95497	15.5084	0.0342731	1	suex-1	N.A.			B0391.14	2.8911	7.41836	0.0184476	1	B0391.14	N.A.
F49F1.12	3.9539	15.4968	0.0251258	0.333338	F49F1.12	N.A.			Y105C5B.29	2.8773	7.34775	0.0399293	1	hlh-32	hlh-32 encodes a basic helix-loop-helix (bHLH) transcription factor similarto the vertebrate Olig2 proteins that play a role in motoneuron andoligodendrocyte development\; genetic analyses suggest that, along withhlh-17, hlh-31 and vab-3, hlh-32 may play a redundant role in regulation of ventral cephalic sheath (CEPsh) glia function, as assayed by AWC axonaldefects\; an hlh-32::gfp promoter fusio…
K07H8.11	3.94314	15.3816	0.0122341	0.215205	K07H8.11	N.A.			C47F8.8	2.83116	7.11647	0.0366435	1	nhr-81	N.A.
B0545.3	3.94198	15.3693	0.000199583	0.0210647	scl-23	N.A.			F56D5.1	2.80438	6.98559	0.0217353	0.387215	col-121	col-121 encodes a cuticle collagen required for resistance to theendocrine disrupting chemical bisphenol A (BPA)\; col-121(nx3) andcol-121(RNAi) animals are hypersensitive to BPA, but are otherwisewild-type (e.g., they have normal body shape)\; BPA hypersensitivity hasalso been observed for dpy-2(e8), dpy-7(e88) and dpy-10(e128) mutants.
ZK783.3	3.92648	15.205	0.0446826	1	ZK783.3	N.A.			T28C6.4	2.80199	6.97403	0.0210074	0.376736	col-117	N.A.
F02C12.2	3.92429	15.182	0.0318018	1	F02C12.2	N.A.			T04C12.1	2.7903	6.91775	0.0325825	1	T04C12.1	N.A.
T28D9.9	3.9146	15.0804	0.00680059	0.152128	lido-16	N.A.			Y47D7A.15	2.78	6.8685	0.0313132	0.470914	Y47D7A.15	N.A.
C17C3.11	3.88967	14.822	0.0376692	0.4221	C17C3.11	N.A.			W04C9.3	2.77595	6.84928	0.00129314	0.0880772	cutl-13	N.A.
C35A5.4	3.88539	14.7782	0.000145255	0.0169206	C35A5.4	N.A.			H04M03.4	2.76484	6.79673	3.17682e-05	0.0115791	glf-1	glf-1 encodes a UDP-galactopyranose mutase predicted to synthesize galactofuranose (Gal(f)) as a nucleotide sugar (UDP-Gal(f))\; recombinant GLF-1 has biochemical activity either in vivo (expressed in E. coli) or in vitro\; orthologs of GLF-1 are found in the urochordates Halocynthia and Ciona.
T06E4.5	3.85669	14.487	0.0149935	0.243104	T06E4.5	N.A.			C03C10.5	2.75686	6.75926	0.000199298	0.0319372	C03C10.5	N.A.
R11H6.7	3.80893	14.0153	0.019491	0.287269	R11H6.7	N.A.			K08C9.4	2.73665	6.6652	0.00201117	0.106011	col-65	N.A.
T28C6.4	3.80176	13.9458	2.4345e-06	0.00132017	col-117	N.A.			T03G6.1	2.73	6.63457	6.9868e-05	0.0188448	T03G6.1	N.A.
F13A7.7	3.75462	13.4975	0.00197122	0.0744205	F13A7.7	N.A.			C32B5.7	2.72851	6.62773	0.0201082	1	C32B5.7	N.A.
K12B6.2	3.73532	13.3181	0.00196121	0.0744205	spe-49	N.A.			H10E21.4	2.71855	6.5821	0.0430144	1	H10E21.4	N.A.
C05B5.6	3.69997	12.9957	0.000960523	0.0504345	fbxa-155	N.A.			C03G6.8	2.70575	6.52396	0.021759	1	nhr-147	N.A.
F01D4.3	3.6917	12.9215	0.00336815	0.0977261	F01D4.3	N.A.			C14A4.9	2.7037	6.51472	0.0138651	1	C14A4.9	N.A.
K03H1.9	3.66301	12.6671	0.00129931	0.0606727	K03H1.9	N.A.			C50B6.4	2.7005	6.50026	0.00263722	0.12264	col-161	N.A.
C15H7.4	3.65001	12.5535	0.0107532	0.201711	C15H7.4	N.A.			B0205.13	2.69344	6.46854	1.45712e-13	2.80725e-10	B0205.13	B0205.13 encodes a small, novel protein conserved in C. remanei and C. briggsae.
W03D8.10	3.64076	12.4732	1.73544e-05	0.00484679	W03D8.10	N.A.			W04H10.5	2.68887	6.44807	0.00349011	0.146464	W04H10.5	N.A.
Y40B10A.4	3.63405	12.4153	0.0285881	0.362439	Y40B10A.4	N.A.			K08D12.4	2.68138	6.41471	0.00923166	1	K08D12.4	N.A.
Y45F10B.2	3.62826	12.3656	0.0245644	0.329327	Y45F10B.2	N.A.			F53E10.5	2.66159	6.32729	0.00532445	1	F53E10.5	N.A.
C44C10.1	3.62673	12.3525	1.18264e-08	1.54985e-05	col-180	N.A.			T23F1.5	2.64962	6.27501	0.0182805	0.353702	rocf-1	N.A.
K07B1.1	3.62329	12.3231	0.00977956	0.189168	try-5	N.A.			F29C12.1	2.64639	6.26098	5.77303e-05	0.0173011	pqn-32	The protein product of this gene is predicted to contain a glutamine\/asparagine (Q\/N)-rich ('prion') domain, by the algorithm of Michelitsch and Weissman (as of the WS77 release of WormBase, i.e., in wormpep77).
F26A1.4	3.58025	11.9609	0.00375626	0.106052	F26A1.4	N.A.			EGAP7.1	2.63615	6.21671	0.0147562	0.316883	dpy-3	N.A.
B0496.6	3.54511	11.673	0.0197767	0.289091	B0496.6	N.A.			C34D4.1	2.62538	6.17045	0.00769426	0.228055	maph-9	N.A.
F26A3.5	3.51019	11.3939	4.65995e-07	0.000431073	F26A3.5	N.A.			Y54G2A.37	2.62114	6.15238	0.00111916	0.0786097	Y54G2A.37	N.A.
F46A8.6	3.50911	11.3854	0.0175596	0.268882	F46A8.6	N.A.			F36H5.3	2.58933	6.01819	0.00996435	1	math-28	N.A.
B0207.11	3.50264	11.3344	0.00103456	0.0524134	B0207.11	B0207.11 encodes a nematode-specific protein probably required for a normally high ovulation rate\; B0207.11 has no obvious non-nematode homologs, but does have a putative N-terminal coiled-coil domain and an SH2 motif, and is is paralogous to four other C. elegans proteins (F42G4.6, F44F4.10, T08G11.2, and Y81G3A.1)\; B0207.11(tm322) hermaphrodites show abnormal egg-laying, retaining significant…			ZC404.1	2.56605	5.92185	0.0300312	1	ZC404.1	N.A.
T02B11.9	3.47192	11.0957	0.00106684	0.0532608	T02B11.9	N.A.			F38B6.5	2.56338	5.91089	0.0250644	1	col-172	N.A.
C29E4.14	3.46491	11.0419	0.0181961	0.275935	C29E4.14	N.A.			Y75B8A.20	2.55967	5.89573	0.00720509	0.221844	grl-15	grl-15 encodes a hedgehog-like protein, with an N-terminal signalsequence, a central proline-rich low-complexity region, and a C-terminalGround-like (Grl) domain\; GRL-15 is expressed in the reproductivesystem, vulva, and larval hypodermis\; the Grl domain is predicted toform a cysteine-crosslinked protein involved in intercellularsignalling, and it has subtle similarity to the N-terminal Hedge d…
W04E12.4	3.46368	11.0324	0.00198615	0.0745312	W04E12.4	N.A.			ZK1067.7	2.55164	5.86302	0.000787868	0.0639586	abu-14	The protein product of abu-14 is predicted to contain a glutamine\/asparagine (Q\/N)-rich ('prion') domain\; abu-14 is transcriptionally up-regulated during times of cuticle synthesis, such as in late embryogenesis and in the molts\; it is localized to the pharyngeal cuticle and is required for the function of the pharyngeal grinder.
F53B7.7	3.46367	11.0324	3.1735e-06	0.00146784	F53B7.7	N.A.			F54E2.2	2.54273	5.82692	0.00415572	0.16151	F54E2.2	N.A.
C45B2.3	3.4543	10.9609	0.00142441	0.0626143	C45B2.3	N.A.			F58E1.10	2.53575	5.79879	0.000963861	0.071421	fbxc-22	N.A.
W09C3.8	3.42858	10.7672	0.00326806	0.0966042	W09C3.8	N.A.			F53F1.5	2.5311	5.78012	0.016461	0.335844	cut-2	cut-2 encodes a secreted protein which is a component of cuticlin, the insoluble residue of nematode cuticles\; CUT-2 is expressed during all developmental stages and contributes to the external cortical layer of the cuticle of all larval stages.
C18E9.8	3.41934	10.6985	1.02401e-06	0.000802757	C18E9.8	C18E9.8 is orthologous to the human gene JOINED TO JAZF1 (JJAZ1\; OMIM:606245), which when mutated leads to disease.			C01B10.5	2.51838	5.72937	0.0175298	0.347656	hil-7	hil-7 encodes an H1 linker histone.
Y116F11B.8	3.40546	10.5961	0.000822763	0.0461517	Y116F11B.8	N.A.			T14F9.5	2.51797	5.72776	0.000251782	0.0373135	lin-32	lin-32 encodes a basic helix-loop-helix transcription factor that is required for development of several types of neurons, including the touch receptor neurons and the male sensory ray neurons.
F59G1.2	3.40208	10.5713	0.0180395	0.27436	tsp-18	N.A.			F52E1.4	2.51162	5.7026	0.0443379	1	gcy-7	gcy-7 encodes a membrane guanylyl cyclase\; a gcy-7::gfp reporter is expressed asymmetrically in the ASEL sensory neuron.
Y39F10A.3	3.39892	10.5482	0.0268778	0.349322	Y39F10A.3	N.A.			F41G3.2	2.49296	5.62932	0.0258638	1	not found
F56H1.3	3.39251	10.5014	0.00976469	0.189113	F56H1.3	N.A.			Y45F10C.6	2.48857	5.61223	0.0026903	0.124153	Y45F10C.6	N.A.
H06I04.5	3.37991	10.4101	4.97931e-05	0.00815674	H06I04.5	N.A.			R02F11.1	2.45377	5.47847	0.00497027	0.182144	R02F11.1	N.A.
C18H2.3	3.37655	10.3859	0.011548	0.209116	C18H2.3	N.A.			ZC123.1	2.43118	5.39334	0.0069247	0.217684	ZC123.1	N.A.
B0024.1	3.35051	10.2001	1.03461e-14	8.13514e-11	col-149	N.A.			ZK675.4	2.41578	5.33608	0.00763697	0.227448	ZK675.4	N.A.
K03B4.6	3.33494	10.0906	0.0393269	0.430022	K03B4.6	N.A.			Y57E12B.3	2.40282	5.28836	0.0146862	0.316883	lipl-6	N.A.
F56D6.14	3.32882	10.0479	0.00508165	0.127348	F56D6.14	N.A.			Y43F8C.4	2.40169	5.2842	0.0244816	0.412184	dyf-19	dyf-19 encodes the C. elegans ortholog of mammalian transition fibre protein FBF1 (Fas(TNFRSF6)-binding factor 1)\; DYF-19 is required for actively regulating transit of assembled intraflagellar transport (IFT) particles through the ciliary base, and thus for proper ciliogenesis\; DYF-19 physically interacts with DYF-11, a component of the IFT-B subcomplex orthologous to mammalian IFT54\; DYF-19 …
T06E4.4	3.32129	9.99558	1.07392e-15	1.68885e-11	col-147	N.A.			F17A9.3	2.39884	5.27379	0.00617802	0.20471	atf-8	N.A.
ZK849.1	3.31857	9.97678	0.0113124	0.2071	ZK849.1	N.A.			Y57A10C.10	2.38997	5.24145	0.0433822	1	Y57A10C.10	N.A.
T06E4.6	3.31846	9.976	3.92207e-05	0.00734267	col-146	N.A.			Y17G9A.1	2.37832	5.19933	0.0333132	1	str-173	N.A.
BE10.5	3.30438	9.87913	0.0224838	0.314015	BE10.5	N.A.			F45C12.11	2.37035	5.17066	0.0398929	1	sdz-18	N.A.
C45G9.15	3.27499	9.67988	0.0171903	0.264871	C45G9.15	N.A.			W04G3.1	2.36987	5.16895	0.000871293	0.0663856	lpr-6	lpr-6 encodes one of seven C. elegans proteins related to the lipocalin family of structurally related, low molecular weight, secreted proteins that bind and transport lipophilic molecules and participate in intercellular signaling\; lpr-6 has been reported to be expressed in the amphid sensory neurons.
C34F11.1	3.27057	9.6503	0.00282947	0.0886815	C34F11.1	N.A.			F40H3.3	2.3576	5.12519	0.0348425	1	F40H3.3	N.A.
F36H2.6	3.26848	9.63632	0.0165233	0.257807	F36H2.6	N.A.			T06E4.6	2.35106	5.10201	0.00528661	0.189112	col-146	N.A.
ZK849.4	3.26181	9.59185	0.00204658	0.0757284	best-25	N.A.			W02B8.5	2.34178	5.06928	0.0197878	1	hot-3	N.A.
W06F12.3	3.26133	9.58865	0.00273584	0.0872193	W06F12.3	N.A.			F53C3.3	2.33419	5.04268	0.0207661	0.373671	F53C3.3	N.A.
K06B4.15	3.25358	9.5373	0.000340565	0.0277813	K06B4.15	N.A.			T22H2.4	2.32733	5.01877	0.0299707	1	T22H2.4	N.A.
H20J04.1	3.24245	9.464	2.67216e-05	0.00636703	H20J04.1	N.A.			T21D12.7	2.30853	4.95376	0.0244093	0.411995	T21D12.7	N.A.
C38C6.5	3.23798	9.4347	0.00552164	0.135889	C38C6.5	N.A.			Y63D3A.3	2.30467	4.94053	6.91877e-07	0.000582761	fbxb-101	N.A.
F43G9.8	3.22767	9.36757	0.0309051	0.379402	F43G9.8	N.A.			F26A10.28	2.29622	4.91169	0.0420661	1	F26A10.28	N.A.
F35E2.6	3.22562	9.35424	0.000359362	0.0286869	oac-19	N.A.			F58F6.1	2.28714	4.88087	0.00659769	0.214663	col-104	N.A.
T11F8.4	3.22068	9.32229	0.000302928	0.0267628	T11F8.4	N.A.			4R79.1	2.28686	4.87993	0.0450027	1	nas-6	nas-6 encodes an astacin-like metalloprotease.
T05B4.14	3.21799	9.30492	0.00118207	0.057374	T05B4.14	N.A.			T14B4.6	2.26699	4.81317	7.32208e-05	0.0193619	dpy-2	The dpy-2 gene encodes an unusual cuticular collagen that is required for maintaining the normal body length of the animal in later larval stages\; dpy-2 interacts with other cuticular collagens such as dpy-10 and sqt-1, and suppresses mutations in glp-1, mup-1, and emb-5.
T16G1.13	3.21348	9.27584	0.0353418	0.40782	T16G1.13	N.A.			Y53F4B.27	2.26152	4.79497	0.0375337	1	Y53F4B.27	N.A.
F15B9.2	3.20331	9.2107	0.000304626	0.0267628	far-4	far-4 encodes a fatty acid and retinol-binding protein, paralogous to FAR-3 and FAR-5 and distantly homologous to FAR proteins of parasitic nematodes\; FAR-4 binds lipids in vitro\; far-4 is transcribed at highest levels in the fourth larval stage, and is dispensable for viability and gross morphology in mass RNAi assays.			F56D2.3	2.25647	4.7782	0.00474637	0.177055	F56D2.3	N.A.
C50F2.5	3.20283	9.20761	3.55415e-05	0.00693986	C50F2.5	N.A.			C25F9.1	2.24998	4.75676	0.00234387	0.115786	srw-85	N.A.
ZC190.7	3.19002	9.12624	0.0214825	0.305311	ZC190.7	N.A.			ZK180.5	2.24919	4.75415	0.0439624	0.551567	ZK180.5	N.A.
T04B2.8	3.1887	9.11787	0.00638602	0.147204	T04B2.8	N.A.			R07E3.3	2.24305	4.73398	0.0033259	0.142829	cut-5	N.A.
ZK688.10	3.17294	9.0188	2.98006e-06	0.00142014	ZK688.10	N.A.			F46C8.2	2.2403	4.72495	0.0261786	1	col-174	N.A.
T27E4.6	3.16007	8.93872	0.00367702	0.104377	oac-50	N.A.			C44H9.7	2.2254	4.67642	0.0017985	0.101061	C44H9.7	N.A.
R05H5.2	3.15891	8.93153	0.00386105	0.107277	cdc-25.4	a homolog of dual specificity phosphatase Cdc25.			M142.2	2.20776	4.61959	0.00499856	0.182685	cut-6	N.A.
F28E10.4	3.15568	8.91157	0.00089538	0.0487223	F28E10.4	N.A.			K08F8.2	2.19383	4.57518	0.000129527	0.0272559	atf-2	atf-2 encodes a cAMP-dependent transcription factor paralogous to CES-2, a bZip-like transcription factor that plays a key role in regulation of apoptosis\; atf-2 activity is required for excretory duct cell development and essential for embryonic development\; in regulating excretory duct cell development, ATF-2 controls expression of lin-48\; in vitro, ATF-2 binds the regulatory regions of LIN-…
F13H8.12	3.13224	8.76795	0.00527594	0.130867	F13H8.12	N.A.			Y46H3A.2	2.19086	4.56578	0.0117673	0.283429	hsp-16.41	hsp-16.41 encodes a 16-kD heat shock protein (HSP) that is a member of the hsp16\/hsp20\/alphaB-crystallin (HSP16) family of heat shock proteins\; an hsp-16.41 reporter fusion, expressed broadly but strongest in intestine and pharynx, is induced in response to heat shock or other environmental stresses\; expression is detectable in somatic tissues in post-gastrulation embryos, all larval stages, …
Y38H6C.15	3.13116	8.76139	0.00182223	0.0720009	Y38H6C.15	N.A.			F42G2.3	2.18522	4.54797	0.00853206	0.240216	fbxc-20	N.A.
F56D5.2	3.12153	8.70313	0.0320025	0.384471	F56D5.2	N.A.			Y102A11A.5	2.18392	4.54385	0.00384586	0.153604	Y102A11A.5	N.A.
C45G9.4	3.11491	8.66324	0.000265401	0.0245512	C45G9.4	N.A.			Y51H7C.10	2.17855	4.52699	0.0061687	0.20471	Y51H7C.10	N.A.
Y51A2B.5	3.11086	8.63896	0.00224879	0.0799773	Y51A2B.5	N.A.			R12A1.3	2.17709	4.52241	0.0224693	0.395074	R12A1.3	N.A.
Y47G6A.26	3.10988	8.63309	5.39443e-05	0.00848328	Y47G6A.26	N.A.			F46C8.6	2.16714	4.49131	0.0326444	0.479491	dpy-7	dpy-7 encodes a cuticular collagen\; DPY-7 functions as a structural constituent of the extracellular cuticle whose activity is required for normal cuticular morphology and hence, proper body form.
Y116F11B.7	3.1083	8.62368	0.00741202	0.160112	Y116F11B.7	N.A.			C40A11.10	2.16509	4.48494	0.00276262	0.126215	mir-8199	N.A.
F36G9.13	3.09746	8.55912	0.00103461	0.0524134	F36G9.13	N.A.			T24A6.8	2.16193	4.47513	0.0267892	1	nhr-221	N.A.
C14A4.8	3.08557	8.48883	0.006504	0.148947	C14A4.8	N.A.			ZC13.4	2.1556	4.45553	0.00304261	0.134976	mab-7	mab-7 encodes a protein with a hydrophobic type II transmembrane region at the N-terminus, an EGF-like motif, a ShKT motif and a long C-terminus\; mab-7 is involved in morphogenesis of the male tail, specifically affecting the structural cells, neuronal processes and the hypodermal sheath of the sensory rays, as such, it affects mating in males\; a mab-7 promoter-gfp construct is expressed in hyp…
F11G11.9	3.07699	8.43849	4.56733e-05	0.00777816	mpst-4	N.A.			F40E10.5	2.15438	4.45176	0.0378612	0.514173	F40E10.5	N.A.
Y37F4.5	3.06934	8.39387	1.44454e-05	0.00445428	Y37F4.5	N.A.			Y53C12C.1	2.15427	4.45142	0.000447053	0.0496411	eyg-1	eyg-1 encodes a divergent PAIRED (PRD) class homeodomain protein\; within the PRD class of homeobox genes, it belongs to the Eyg (eyegone) family of PRD homeobox genes that has been lost in vertebrates\; eyg-1 lost the first half of the Paired domain and only retained the second half (RED subdomain)\; it has no obvious function in mass RNAi assays.
F44D12.6	3.0618	8.35015	0.001549	0.0661593	F44D12.6	N.A.			ZK1248.2	2.13853	4.40312	0.000820089	0.0642354	col-74	N.A.
F35E2.10	3.05155	8.29104	0.0341253	0.398936	F35E2.10	N.A.			T16A1.1	2.13559	4.39416	0.00689172	0.217662	math-42	N.A.
T04A6.3	3.04739	8.26714	0.0306591	0.377265	T04A6.3	N.A.			F49B2.3	2.13094	4.38003	0.0100164	0.25862	F49B2.3	N.A.
Y51H4A.22	3.04467	8.2516	0.0301151	0.374972	Y51H4A.22	N.A.			Y38H6A.5	2.11961	4.34576	0.0130775	0.297459	Y38H6A.5	N.A.
R13F6.5	3.03887	8.21847	0.035624	0.410119	dhhc-5	N.A.			W04G3.2	2.11553	4.33348	0.00167496	0.098691	lpr-5	lpr-5 encodes one of seven C. elegans proteins related to the lipocalin family of structurally related, low molecular weight, secreted proteins that bind and transport lipophilic molecules and participate in intercellular signaling\; loss of lpr-5 function via RNAi results in defects in locomotion, body morphology, larval lethality, and yolk endocytosis\; lpr-5 appears to be expressed in the hypo…
C25F9.11	3.0367	8.20614	0.0165392	0.257807	C25F9.11	N.A.			F08D12.12	2.11376	4.32817	0.0467787	1	F08D12.12	N.A.
F26G1.8	3.03299	8.18502	0.0206509	0.298488	msp-42	msp-42 encodes a protein that belongs to a family of proteins called the Major Sperm Proteins (MSPs) that is conserved in nematodes\; this family consists of closely related, small, basic proteins that make up 15\% of sperm protein\; this multigene family consists of over fifty genes, including many pseudogenes\; MSPs are involved in both extracellular signaling and cytoskeletal functions during …			Y38C1BA.3	2.11292	4.32565	0.0441322	0.551591	col-109	col-109 encodes a cuticular collagen\; loss of col-109 via large-scale RNAi screens results in no obvious defects.
K11C4.1	3.03283	8.18412	2.94007e-05	0.00650411	K11C4.1	N.A.			C15C8.2	2.09768	4.28022	0.0412203	0.534907	cky-1	cky-1 encodes a member of the basic helix-loop-helix\/Per-Arnt-Sim (bHLH-PAS) protein family\; CKY-1 physically interacts with AHA-1, and when co-expressed in vitro, an AHA-1\/CKY-1 complex exhibits sequence-specific DNA binding\; when co-expressed in cultured cells, the AHA-1\/CKY-1 complex can stimulate reporter gene transcription\; cky-1 is expressed in non-neuronal pharyngeal cells.
C10C6.3	3.01872	8.10449	0.0312408	0.381143	C10C6.3	N.A.			C44H4.1	2.08898	4.25448	0.00283385	0.128612	lron-1	N.A.
T16G12.7	3.0151	8.08419	0.00014195	0.0169114	T16G12.7	N.A.			B0491.4	2.08631	4.24661	0.00362297	0.148127	lgc-20	N.A.
B0393.4	3.01363	8.07595	0.000953255	0.0504345	B0393.4	N.A.			F15B9.8	2.06475	4.18362	0.00457842	0.172954	F15B9.8	N.A.
D1065.3	3.00695	8.03865	0.0364321	0.415701	D1065.3	N.A.			Y41D4B.6	2.06402	4.18151	0.00808834	0.233076	Y41D4B.6	N.A.
B0222.7	2.98627	7.92424	0.00172655	0.0700359	col-145	N.A.			T11F9.9	2.04454	4.12541	0.0355165	0.501243	col-157	N.A.
T28C12.3	2.96231	7.79371	0.000934178	0.0501395	fbxa-202	This gene encodes a protein containing an F-box, a motif predicted to mediate protein-protein interactions either with homologs of yeast Skp-1p or with other proteins\; this gene's encoded protein also contains an FTH\/DUF38 motif, which may also mediate protein-protein interaction.			T05H10.3	2.04171	4.11734	0.0020877	0.107872	T05H10.3	N.A.
B0207.7	2.95917	7.77676	0.00125786	0.0594298	B0207.7	N.A.			SSSD1.1	2.04029	4.11328	6.56135e-05	0.0184727	igcm-2	igcm-2 encodes a protein containing immunoglobulin and fibronectin repeats\; igcm-2 promoter::gfp fusions are expressed in the PVT interneuron, in some head neurons, and in the pharynx and intestine.
C04F12.6	2.94702	7.71156	0.0302028	0.375173	C04F12.6	N.A.			F22F4.1	2.03798	4.10669	0.000364286	0.0430944	sups-1	N.A.
F17C8.5	2.94329	7.69162	0.0402338	0.435156	twk-6	twk-6 encodes one of 44 C. elegans TWK (two-P domain K+) potassium channel subunits that contain two pore-forming domains and four transmembrane domains\; as loss of TWK-6 function via RNA-mediated interference (RNAi) does not result in any abnormalities, the precise role of TWK-6 in C. elegans development and\/or behavior is not yet known\; TWK-6 may, however, function redundantly with other TWK…			Y113G7A.6	2.03456	4.09699	0.00107515	0.076717	ttx-1	ttx-1 encodes a homeodomain protein that is a member of the OTD\/OTX subclass of homeodomain transcription factors\; ttx-1 is expressed at higher levels in the AFD thermosensory neurons as compared to the AWB olfactory neurons and is necessary and partly sufficient for specification of the AFD thermosensory neuron fate and thus for proper AFD-mediated thermosensory behavior and normal expression …
R07C3.13	2.94122	7.68062	0.00138217	0.0621985	R07C3.13	N.A.			ZC84.7	2.03056	4.08564	0.0410321	1	ZC84.7	N.A.
F57A8.6	2.9343	7.64387	4.20697e-05	0.00752261	F57A8.6	N.A.			C44C10.1	2.02818	4.0789	0.00386399	0.153604	col-180	N.A.
T23B7.2	2.92714	7.60602	0.00728936	0.158706	T23B7.2	N.A.			T04H1.6	2.01985	4.05541	0.0228891	1	lrx-1	lrx-1 encodes a protein that contains four class A low-density lipoprotein receptor domains.
F47G6.3	2.92536	7.59663	0.0162169	0.256825	F47G6.3	N.A.			C10A4.3	2.01487	4.04144	0.0156074	0.327776	C10A4.3	N.A.
K09C6.8	2.92522	7.59587	0.017369	0.267101	K09C6.8	N.A.			F47C12.1	2.01443	4.04022	0.000289302	0.039147	not found
T10E10.1	2.91594	7.54721	5.67618e-05	0.00875391	col-168	N.A.			Y47G6A.17	1.99349	3.98198	0.00612025	0.204692	ccep-290	N.A.
K01H12.2	2.90545	7.49249	1.95207e-06	0.00113697	ant-1.3	ant-1.3 encodes an ortholog of the human adenine nucleotide translocase ANT genes, the other ANT genes in C. elegans include ant-1.1, ant-1.2 and ant-1.4\; by homology, ANT-1.3 is predicted to mediate the exchange of ATP generated in the mitochondria for cytosolic ADP\; ANT-1.3 GFP fusion protein is expressed in the intestine and the anterior of the elongating embryo, and in a pair of head neuron…			B0304.3	1.99274	3.97992	0.0367769	1	cyp-23A1	cyp-23A1 encodes a cytochrome P450 homologous to the human gene CYP7B1, which when mutated leads to giant cell hepatitis (OMIM:231100)\; as a cytochrome P450, CYP-23A1 is predicted to function as a membrane-associated, heme-containing NADPH-dependent monooxygenases that catalyzes the oxidative metabolism of a variety of exogenous compounds and endogenous substrates.
Y46G5A.25	2.90271	7.47827	0.0134421	0.225671	snf-4	N.A.			T10E10.2	1.98366	3.95495	0.00727321	0.222418	col-167	N.A.
ZK262.9	2.90254	7.4774	0.0257692	0.339119	ZK262.9	N.A.			F26D10.11	1.98186	3.95001	0.00615026	0.20471	lhfp-4	F26D10.11 encodes an ortholog of murine TMHS (mutated in hurry-scurry\/hscy mice), a predicted tetraspan membrane protein required for stereociliary function and a possible ortholog of human DFNB53\; the cysteine mutated in hscy mice is conserved in F26D10.11.
F21F3.2	2.90231	7.4762	7.27417e-05	0.0106988	F21F3.2	N.A.			C17E4.19	1.97923	3.94283	0.0224617	0.395074	C17E4.19	N.A.
ZK617.3	2.9013	7.47101	0.0159818	0.254125	spe-17	spe-17 is predicted to encode a hydrophilic serine\/threonine rich protein with no significant homology to any known protein\; spe-17 is required for the proper development of spermatids into sperm during spermatogenesis and thus for fertility\; specifically, spe-17 is required for the correct partitioning of organelles and sperm components into specialized Golgi-derived fibrous body-membranous o…			ZC190.5	1.97811	3.93977	0.00157416	0.0962648	ZC190.5	N.A.
F59A3.8	2.90124	7.47069	3.91976e-05	0.00734267	F59A3.8	N.A.			F23A7.1	1.97393	3.92836	0.0318018	1	F23A7.1	N.A.
F41E7.6	2.9011	7.46996	0.00124407	0.0591788	F41E7.6	N.A.			R03H10.2	1.97374	3.92786	2.3109e-05	0.00973899	R03H10.2	N.A.
C38D9.9	2.89964	7.46243	0.0122089	0.215003	fbxa-176	This gene encodes a protein containing an F-box, a motif predicted to mediate protein-protein interactions either with homologs of yeast Skp-1p or with other proteins\; this gene's encoded protein also contains an FTH\/DUF38 motif, which may also mediate protein-protein interaction.			F27E5.4	1.96581	3.90631	0.0147431	0.316883	phg-1	N.A.
C29F5.2	2.87423	7.3321	0.0466376	0.468342	sdz-3	N.A.			ZK377.1	1.96074	3.8926	0.0191352	0.358912	wrt-6	wrt-6 encodes a hedgehog-like protein, with (from N- to C-terminus) asignal sequence, a Wart domain, an short region of low-complexitysequence, and a Hint\/Hog domain\; WRT-6 is expressed in sheath and socketcells of anterior sensilla, seam cells, and hypodermis\; the Hint\/Hogdomain is predicted to cut WRT-6 into two halves and then covalentlylink cholesterol to the C-terminus of the Wart domain…
F07E5.8	2.87077	7.31457	0.000539257	0.0357821	F07E5.8	N.A.			ZK993.1	1.95461	3.87612	0.00595199	0.20168	ceh-45	ceh-45 encodes a homeodomain-containing protein\; loss of ceh-45 activity via large-scale RNAi results in variable embryonic lethality.
C09G5.4	2.86717	7.29635	2.05548e-10	3.5916e-07	col-39	col-39 encodes a collagen that is individually dispensable for viability and gross morphology in mass RNAi screens\; the amino- and carboxyl-terminal cysteine-rich regions of COL-39 are most closely related to those of COL-8, COL-19, and COL-35.			T24H10.5	1.94612	3.85336	0.00167583	0.098691	T24H10.5	N.A.
Y49F6B.8	2.85788	7.24947	0.00012475	0.0156946	Y49F6B.8	N.A.			K10G6.4	1.94564	3.85208	0.0130609	0.297459	cank-26	N.A.
F55C5.2	2.85456	7.23281	0.000315616	0.0271223	F55C5.2	N.A.			H42K12.3	1.94319	3.84555	0.00726247	0.222418	H42K12.3	N.A.
F58E6.12	2.85433	7.23167	0.0136694	0.228443	2021-03-01	N.A.			C09F9.7	1.9409	3.83944	0.0448517	0.557998	C09F9.7	N.A.
T01B11.4	2.8328	7.12456	1.15131e-05	0.00377197	ant-1.4	ant-1.4 encodes an ortholog of the human adenine nucleotide translocase ANT genes, the other ANT genes in C. elegans include ant-1.1, ant-1.2 and ant-1.3\; phylogenetic analysis indicates that ant-1.4 is specific to C. elegans, resulting from a recent duplication following the speciation of the common ancestor of C. elegans, C. briggsae, and C. remanei\; by homology, ANT-1.4 is predicted to media…			Y2H9A.3	1.94007	3.83725	0.00945065	0.252573	col-162	N.A.
ZK616.61	2.83182	7.11972	0.000342608	0.0277813	ZK616.61	N.A.			Y52B11A.12	1.93825	3.8324	0.0471247	1	Y52B11A.12	N.A.
ZC581.10	2.82719	7.0969	0.0126362	0.21837	ZC581.10	N.A.			Y46H3A.3	1.93419	3.82162	0.0378648	0.514173	hsp-16.2	hsp-16.2 encodes a 16-kD heat shock protein (HSP) that is a member of the hsp16\/hsp20\/alphaB-crystallin (HSP16) family of heat shock proteins\; hsp-16.2 expression, strongest in intestine and pharynx, is induced in response to heat shock or other environmental stresses\; HSP-16.2 has been shown to interact with intracellular human beta amyloid peptide, a primary component of the extracellular p…
AC7.3	2.82514	7.08681	0.0122801	0.215293	AC7.3	N.A.			F57A10.5	1.93239	3.81688	0.00549792	0.191932	nhr-60	nhr-60 encodes a nuclear hormone receptor required for seam cell development, and for embryonic and early larval viability\; NHR-60 has no obvious non-nematode orthologs, and is thus classified as 'supplementary'\; NHR-60 is expressed throughout development in most cells from one-cell embryos to adults, and is noticeably enriched in seam cells and germline\; NHR-60's germline enrichment suggests …
Y39B6A.25	2.8249	7.08564	0.01406	0.232501	Y39B6A.25	N.A.			F58E6.13	1.9254	3.79841	0.0308912	0.468088	F58E6.13	N.A.
T10E10.2	2.82448	7.08356	3.0267e-08	3.39985e-05	col-167	N.A.			T10D4.6	1.91207	3.76348	9.75874e-16	4.38688e-12	T10D4.6	N.A.
C42D4.3	2.81991	7.0612	0.000425824	0.0320407	C42D4.3	N.A.			ZC13.3	1.90644	3.74884	0.0357619	0.503428	mam-1	N.A.
T01C3.5	2.81356	7.03015	0.000114174	0.0144799	irld-14	N.A.			Y51H7C.12	1.90302	3.73995	0.019363	0.360387	Y51H7C.12	N.A.
Y4C6A.1	2.80138	6.97107	0.0241935	0.326861	Y4C6A.1	N.A.			F18E9.1	1.89981	3.73165	0.0384601	1	F18E9.1	N.A.
C09B9.7	2.79814	6.95543	0.0102579	0.195062	C09B9.7	N.A.			Y39A1A.9	1.89701	3.7244	0.0177324	0.348737	Y39A1A.9	N.A.
R09B5.8	2.79435	6.93718	0.0481201	0.474146	cnc-3	cnc-3 encodes one of eleven C. elegans caenacin peptides\; CNC-3 is predicted to be a secreted protein that, based upon similarity to CNC-2, -4, and -6, may function as an antimicrobial peptide in the innate immune response.			F53C3.6	1.8962	3.72232	0.00840428	0.239114	F53C3.6	N.A.
C06A6.7	2.7893	6.91295	0.00185208	0.0722724	C06A6.7	N.A.			W01F3.3	1.89567	3.72094	0.0477168	0.572008	mlt-11	mlt-11 encodes one of 13 C. elegans proteins related to the mammalian Tissue Factor Pathway Inhibitors (TFPIs), serine protease inhibitors that function in blood coagulation (OMIM:152310)\; in C. elegans, genetic analysis indicates that mlt-11 is required for proper molting and, likely, for proper spatial and\/or temporal regulation of proteolysis during the molting cycle\; a mlt-11::gfp promoter…
C04C3.6	2.77806	6.8593	0.0475246	0.472321	C04C3.6	N.A.			ZC328.1	1.89483	3.71879	0.00079398	0.0639586	cuti-1	N.A.
T28C6.6	2.77316	6.83602	0.00177227	0.0709179	col-3	col-3 encodes a collagen protein that affects body morphogenesis, larval viability, and locomotion in large scale RNAi screens\; mRNA is expressed during all developmental stages examined (in embryos, during the L2 to dauer molt, during the dauer to L4 larval molt, and during the L4 to adult molt).			F23H12.4	1.88603	3.69616	0.0438708	0.55139	sqt-3	sqt-3 encodes a cuticle collagen\; during development, sqt-3 activity is essential for viability and normal body morphology\; genetic and expression studies indicate that SQT-3 is a cuticle component at all stages of development and that SQT-3 likely forms higher order cuticular structures with the DPY-17 cuticular collagen, both of which are candidate substrates for the DPY-31 procollagen C-prot…
ZK666.8	2.77231	6.83199	0.0309597	0.379572	ZK666.8	N.A.			R12E2.14	1.88554	3.69491	0.0454429	0.562241	R12E2.14	N.A.
R155.3	2.77159	6.82858	0.000660094	0.041193	R155.3	N.A.			ZC204.14	1.88204	3.68595	6.06007e-08	6.28662e-05	ZC204.14	N.A.
F14D7.10	2.76378	6.79174	0.0304626	0.37645	F14D7.10	N.A.			K08B12.1	1.87867	3.67735	0.0379469	0.514323	K08B12.1	N.A.
B0432.11	2.7607	6.77725	0.0382102	0.424559	B0432.11	N.A.			W06A11.3	1.87754	3.67449	0.0303758	0.463962	fbxb-118	N.A.
T28B8.6	2.75674	6.75868	0.00314477	0.0945596	T28B8.6	N.A.			C16C8.2	1.87044	3.65645	0.0349155	0.496698	skpo-2	N.A.
F26A1.3	2.75673	6.75865	0.000353985	0.0284019	F26A1.3	N.A.			C25D7.3	1.86865	3.6519	1.52255e-15	5.13327e-12	sdc-3	sdc-3 encodes a protein that contains two mutationally separable domains: a zinc finger motif required for dosage compensation and a myosin- like putative ATP- binding region required for her-1 regulation of sex determination\; SDC-3 activates dosage compensation by directing the dosage compensation protein complex to the hermaphrodite X chromosomes, and is functionally redundant with SDC-2 with …
F57H12.3	2.75431	6.74731	0.000429877	0.0320775	ora-1	N.A.			ZK1290.12	1.86486	3.64232	0.00238361	0.116892	wrt-1	N.A.
R02F2.5	2.73766	6.66988	0.0412524	0.441317	R02F2.5	N.A.			F56E3.4	1.86204	3.63521	0.0457623	0.565156	fax-1	fax-1 encodes a conserved nuclear receptor that contains two C4-type zinc fingers and is orthologous to the vertebrate photoreceptor-specific nuclear receptor PNR (OMIM:604485, mutated in enhanced S-cone syndrome and retinitis pigmentosa)\; fax-1 is required for normal locomotion and neuron fate specification, including specification of the AVA, AVE, and AVK interneurons and proper axon pathfindi…
C10G11.10	2.73314	6.64902	0.0130374	0.222214	C10G11.10	N.A.			F13D11.2	1.85972	3.62937	0.000541618	0.0520699	hbl-1	hbl-1 encodes a C2H2-type zinc finger transcription factor related to Drosophila hunchback\; hbl-1 is a heterochronic gene that plays an essential role in regulating developmental timing during postembryonic development\; accordingly, mutations in hbl-1 affect locomotion, egg laying, body morphology, and hypodermal differentiation\; hbl-1 is expressed in hypodermal precursor cells, neuronal precu…
C18H7.7	2.73308	6.64876	0.00136294	0.0619466	C18H7.7	N.A.			C48B4.3	1.85761	3.62407	0.0177028	0.348737	C48B4.3	N.A.
ZK354.8	2.73107	6.63947	1.18211e-06	0.000844997	ZK354.8	N.A.			C02F12.1	1.8512	3.60801	0.00216379	0.110116	tsp-17	N.A.
F56H11.3	2.72936	6.63162	0.00381169	0.10669	elo-7	The elo-7 gene encodes a paralog of elo-1 and elo-2, each of which encodes a polyunsaturated fatty acid (PUFA) elongase\; ELO-7 has no known function in vivo.			ZC168.2	1.84723	3.59809	0.0406659	1	ZC168.2	N.A.
K06A4.8	2.71891	6.58374	0.0116411	0.210089	K06A4.8	N.A.			T02E9.2	1.84471	3.59181	0.0161495	0.331942	grl-7	grl-7 encodes a hedgehog-like protein, with an N-terminal signalsequence, a central low-complexity region, and a C-terminal Ground-like(Grl) domain\; GRL-7 is expressed in intestine, hypodermis, and seamcells\; the Grl domain is predicted to form a cysteine-crosslinkedprotein involved in intercellular signalling, and it has subtlesimilarity to the N-terminal Hedge domain of HEDGEHOG proteins.
T23F6.3	2.71819	6.58048	0.000259435	0.0242084	T23F6.3	N.A.			T19A5.3	1.83843	3.57622	0.00785191	0.228507	T19A5.3	N.A.
C15A11.5	2.71618	6.57129	4.57818e-05	0.00777816	col-7	col-7 encodes a member of the collagen superfamily containing collagen triple helix repeats (20 copies)\; expressed during the L2-to-dauer molt and the L4-to-adult molt.			C26F1.1	1.83829	3.57585	0.0336372	0.486268	C26F1.1	N.A.
R08C7.8	2.71325	6.55799	0.00200548	0.0745582	R08C7.8	N.A.			ZC101.3	1.83555	3.56907	0.00194187	0.104865	hhat-1	hhat-1 encodes a putative protein-cysteine N-palmitoyltransferase ('hedgehog acyltransferase') orthologous to human HHAT (OMIM: 605743) and GUP1 (OMIM:608116), and paralogous to HHAT-2\; since C. elegans has no HEDGEHOG homolog, the substrate and function of HHAT-1 in vivo are unclear.
C29F4.1	2.70914	6.53931	7.88392e-05	0.0112169	col-125	N.A.			T10D4.5	1.83463	3.5668	0.0169027	0.343022	srh-71	N.A.
C09H10.1	2.70204	6.50722	0.0108749	0.203352	rpl-42	N.A.			Y74E4A.1	1.83421	3.56577	0.00119644	0.0831708	lgc-27	N.A.
C47E8.1	2.6992	6.49441	0.0125756	0.217857	C47E8.1	N.A.			T02G5.15	1.83358	3.56421	0.0197478	0.361356	T02G5.15	N.A.
R01H2.4	2.69289	6.46608	0.00593807	0.141498	R01H2.4	N.A.			Y60A9A.3	1.82477	3.54252	0.042748	1	Y60A9A.3	N.A.
Y116A8A.6	2.69228	6.46333	0.0460673	0.46672	Y116A8A.6	N.A.			F59A7.4	1.82439	3.54158	0.0273273	0.437486	hil-6	N.A.
ZK673.6	2.68983	6.45238	0.0145252	0.237417	ZK673.6	N.A.			F58E6.10	1.82192	3.53552	0.00376495	0.152018	unc-42	unc-42 encodes a paired-like homeodomain protein of the Q50 class\; UNC-42 is required to specify the fate of ASH sensory neurons, AVA, AVD, and AVE interneurons, and a subset of motor neurons\; unc-42 mutants fail to express cell-surface receptors required for differentiated neuronal function (sra-6, srb-6, glr-1, glr-5, and glr-6)\; UNC-42 is also required for AVKR and HSNL growth cones to foll…
C41G7.6	2.68955	6.45112	2.60144e-06	0.00132912	cylc-2	N.A.			C44B9.6	1.81858	3.52733	0.0480878	1	fbxb-87	This gene encodes a protein containing an F-box, a motif predicted to mediate protein-protein interactions either with homologs of yeast Skp-1p or with other proteins.
Y51H7C.1	2.68892	6.44832	0.0113513	0.207253	Y51H7C.1	N.A.			F44E5.5	1.79891	3.47956	0.0473864	0.570583	F44E5.5	F44E5.5 encodes a member of the Hsp70 family of heat shock proteins\; as loss of F44E5.5 activity via large-scale RNAi screens results in no obvious defects, the precise role of F44E5.5 in C. elegans development and\/or behavior is not yet known.
F21F3.3	2.68871	6.44736	9.95771e-05	0.0133899	icmt-1	N.A.			C07G3.8	1.79824	3.47797	0.0480236	1	C07G3.8	N.A.
F36H12.14	2.68835	6.44574	0.0212645	0.304836	F36H12.14	N.A.			W02A2.3	1.78996	3.45805	0.00636043	0.209723	pqn-74	pqn-74 encodes a protein with two chitin-binding peritrophin-A domains,separated by a glutamine\/asparagine (Q\/N)-rich ('prion') domain\; likeCEJ-1 and CPG-2, PQN-74 might participate in eggshell synthesis andearly embryonic development, and PQN-74's peritrophin-A domains mightenable mechanical cross-linking of chitin.
Y73C8C.2	2.68786	6.44358	6.91568e-06	0.00258943	clec-210	N.A.			R01B10.2	1.78811	3.45362	0.0062154	0.205443	R01B10.2	N.A.
Y116A8C.24	2.68675	6.4386	0.00283086	0.0886815	Y116A8C.24	N.A.			ZK265.4	1.77831	3.43024	0.0327894	0.479491	ceh-8	ceh-8 encodes a paired-like homeodomain protein of the Q50 class orthologous to the Rx homeobox protein of humans (RAX\; OMIM:601881) and Drosophila (CG10052-PA)\; CEH-8 and RX belong to one of at least 18 distinct families of paired-like homeodomain proteins, including 12 families in the Q50 class.
F46F5.9	2.68547	6.43289	0.0171966	0.264871	msrp-4	N.A.			W04H10.6	1.77169	3.41453	0.0389373	0.520809	W04H10.6	N.A.
T08B6.9	2.67308	6.37791	0.000823743	0.0461517	T08B6.9	N.A.			C14F11.6	1.76947	3.40928	0.00706594	0.220582	rml-3	N.A.
AH10.1	2.67258	6.3757	2.79103e-05	0.00645466	acs-10	N.A.			F36H5.7	1.76591	3.40089	0.0111496	0.277382	str-179	N.A.
ZC376.8	2.67188	6.37259	0.00206576	0.075902	ZC376.8	N.A.			F31D4.5	1.76558	3.40012	0.0115498	0.281664	F31D4.5	N.A.
F55F8.7	2.66376	6.33682	0.000161751	0.0186126	F55F8.7	N.A.			T14G12.4	1.76499	3.39871	0.000153027	0.0285576	fkh-2	fkh-2 encodes one of 15 C. elegans forkhead transcription factors and is homologous to Drosophila sloppy-paired (slp) and the vertebrate Brain Factor 1 (BF-1, OMIM:164874, expression is restricted to the central nervous system)\; fkh-2 is required, along with ceh-37, for proper development of the AWB chemosensory neurons\; specifically, fkh-2 is required for development of AWB-specific ciliary an…
C02E7.6	2.66319	6.33431	0.0294082	0.369074	C02E7.6	N.A.			M163.3	1.757	3.37994	0.000454406	0.0496411	his-24	his-24 encodes one of eight C. elegans H1 linker histones\; HIS-24, along with the histone deacetylase SIR-2.1 and the Enhancer of zeste E(Z) ortholog MES-2, plays a key role in heterochromatin regulation and thus, in regulation of fertility and embryonic development\; specifically, HIS-24 and SIR-2.1 are essential for maintenance of the histone H3K27me3 mark at subtelomeric regions in the C. ele…
F46A9.1	2.66276	6.33243	3.06317e-05	0.00650597	F46A9.1	N.A.			ZK662.8	1.74944	3.36228	0.0451385	1	ZK662.8	N.A.
D2062.1	2.65268	6.28834	0.000220317	0.0224981	D2062.1	N.A.			C04C3.5	1.74575	3.35369	2.11365e-06	0.00135737	dyf-3	dyf-3 encodes an ortholog of zebrafish cluap1 (also qilin, and like PKD2required to suppress kidney cysts) and human clusterin-associatedprotein 1 (CLUAP1)\; DYF-3 is predicted to have two coiled-coil domains\;DYF-3 is required for normal assembly of middle and distal ciliarysegments, with dyf-3 mutants showing truncated sensory cilia\; DYF-3 isrequired cell-autonomously for dye uptake\; dyf-3 is…
Y49E10.10	2.65069	6.27969	0.00057756	0.0369216	Y49E10.10	N.A.			Y43F8B.3	1.74512	3.35223	0.00251631	0.119848	Y43F8B.3	N.A.
T08G3.4	2.63781	6.22384	0.000769188	0.0451353	T08G3.4	N.A.			C18D4.6	1.74475	3.35136	6.61864e-12	9.91767e-09	C18D4.6	N.A.
T22A3.6	2.63748	6.22245	0.0380846	0.424312	T22A3.6	N.A.			M142.4	1.74258	3.34633	0.0103006	0.263094	vab-7	The vab-7 gene encodes an even-skipped-like homeodomain protein that is required for DB motoneuron identity and posterior DB axonal polarity.
W08D2.8	2.63141	6.19631	0.00179054	0.0713987	kin-21	N.A.			C14C11.8	1.74103	3.34274	0.0184195	0.355129	pqn-13	The protein product of this gene is predicted to contain a glutamine\/asparagine (Q\/N)-rich ('prion') domain, by the algorithm of Michelitsch and Weissman (as of the WS77 release of WormBase, i.e., in wormpep77).
F30A10.12	2.62853	6.18394	0.00592629	0.141498	F30A10.12	N.A.			F54B11.10	1.74079	3.34218	0.0429857	0.547242	F54B11.10	N.A.
Y62E10A.3	2.62786	6.18107	0.0470135	0.469981	Y62E10A.3	N.A.			F46F3.1	1.73866	3.33726	5.21422e-06	0.00270458	ceh-27	ceh-27 encodes a homeodomain protein of the NK-2 class that contains Drosophila scarecrow and human NKX-2 (OMIM:606727)\; CEH-27 activity is essential for embryogenesis and appears to be required for maintaining hypodermal integrity during movement as embryos lacking CEH-27 burst at a breach in the ventral hypodermis upon commencement of muscle contractions\; CEH-27 expression is first detected i…
H08M01.1	2.62517	6.16955	0.000805593	0.0461517	H08M01.1	N.A.			F28F9.1	1.73291	3.32399	0.00155097	0.0955912	zag-1	zag-1 encodes a homeodomain protein of the ZFH class which consists of a homeodomain flanked by two clusters of C2H2-type zinc fingers and is related to transcriptional repressors encoded by Drosophila zfh-1 and the vertebrate ZEB genes\; ZAG-1 is required for locomotion, for neuronal differentiation, and for proper axonal branching and fasciculation\; from late embryogenesis through adult stages…
C01G5.3	2.61615	6.13113	0.0120183	0.214043	C01G5.3	N.A.			D1054.9	1.72943	3.31596	0.0435462	0.550511	D1054.9	N.A.
B0416.11	2.6135	6.11987	0.029508	0.369755	B0416.11	N.A.			F40E10.1	1.72722	3.3109	0.000692611	0.0598753	hch-1	hch-1 encodes a member of the zinc-dependent metalloprotease family that contains an epidermal growth factor-like domain, a CUB domain, and a TSP1 domain and affects hatching and QL neuroblast migration.
F47D12.7	2.60734	6.09379	2.47646e-05	0.00608514	F47D12.7	N.A.			ZK909.4	1.72333	3.30198	0.000318196	0.0401046	ces-2	ces-2 encodes a basic region leucine-zipper (bZIP) transcription factor, most similar in sequence and binding specificity to the PAR (proline- and acid-rich) subfamily of bZIP proteins\; ces-2 is required to activate programmed cell death in the sister cells of the serotoninergic neurosecretory motor (NSM) neurons, and is transcriptionally inhibited by activated LET-60(G12V)\; in regulating progr…
C10G11.9	2.60661	6.09071	3.10281e-05	0.00650597	spch-2	spch-2 encodes one of three C. elegans small, highly basic proteins that have similarity to mouse testis-specific histone H1, the human nucleotide-binding and splicing-associated protein SON, and the mollusk protamine-like SNBPs (sperm nuclear basic proteins)\; SPCH-2 associates specifically with spermatogenic meiotic and mature sperm chromatin.			T24B8.6	1.72091	3.29645	6.57487e-05	0.0184727	hlh-3	hlh-3 encodes a basic helix-loop-helix transcription factor homologous to Drosophila Achaete-scute\; in vitro, HLH-3 can heterodimerize, and bind an E-box-containing probe, with HLH-2, the C. elegans E\/daughterless ortholog with which it is coexpressed in the nuclei of embryonic neuronal precursors.
Y54E2A.9	2.60414	6.08029	3.33184e-05	0.00679505	Y54E2A.9	N.A.			2RSSE.6	1.71799	3.28977	0.0246464	0.412244	2RSSE.6	N.A.
B0024.4	2.59798	6.05437	0.00451287	0.118366	B0024.4	N.A.			T23F2.1	1.71263	3.27758	0.0100567	0.258825	bus-8	bus-8 encodes a glycosyltransferase related to mannosyltransferases that play a role in protein N-linked glycosylation \; bus-8 is required for colonization by Microbacterium nematophilum and the tail-swelling response to M. nematophilum infection\; bus-8 is also essential for enclosure during embryonic morphogenesis, functioning in or with ephrin-mediated signaling to effect the proper neuroblas…
F54A3.4	2.59595	6.04585	0.000783933	0.045324	cbs-2	The F54A3.4 gene encodes a homolog of the human gene CBS, which when mutated leads to homocystinuria (OMIM:236200).			F59B10.3	1.71209	3.27635	0.0405155	1	F59B10.3	N.A.
Y51H7C.13	2.58727	6.00959	0.000713888	0.0431041	Y51H7C.13	N.A.			F41A4.1	1.71073	3.27326	0.0153283	0.322996	cutl-28	N.A.
H12D21.13	2.5845	5.99807	0.024703	0.329779	nspa-4	N.A.			T22F7.5	1.70802	3.26712	0.0194544	0.360387	not found
K03H1.12	2.58172	5.98655	0.0195665	0.287304	K03H1.12	N.A.			C44H4.3	1.69964	3.24819	0.000565576	0.0528084	sym-1	sym-1 encodes a protein containing 15 contiguous leucine-rich repeats (LRRs) that functionally overlaps with sym-5 and interacts with mec-8 with respect to embryonic viability and attachment of body muscle to the extracellular cuticle\; expression begins at the time of embryonic elongation and SYM-1 is secreted from the apical hypodermal surface of the embryo\; microarray analyses indicate that s…
K01D12.15	2.58026	5.98048	7.42763e-05	0.0108155	K01D12.15	N.A.			C45B2.7	1.6992	3.2472	0.00779997	0.228368	ptr-4	ptr-4 encodes a nematode-specific member of the sterol sensing domain(SSD) proteins, distantly paralogous to Drosophila PATCHED (PTC) andhuman PTCH (OMIM:601309, mutated in basal cell nevus syndrome)\; PTR-4 isstrongly required for normal molting from L4 to adult stages male taildevelopment (a role conserved in C. briggsae)\; PTR-4 is also requiredfor normal endocytosis of yolk by oocytes, adult …
T27A3.5	2.57752	5.96914	4.63626e-05	0.00777816	T27A3.5	N.A.			ZK1290.8	1.69361	3.23466	0.00181822	0.101324	wrt-10	wrt-10 encodes a hedgehog-like protein, with an N-terminal signalsequence, a Wart domain, and a C-terminal region of low-complexitysequence\; WRT-10 is expressed in both male and hermaphrodite intestine\;the Wart domain is predicted to form a cysteine-crosslinked proteininvolved in intercellular signalling, and it has subtle similarity tothe N-terminal Hedge domain of HEDGEHOG proteins\; WRT-10 i…
F09G2.6	2.57516	5.95939	0.03309	0.390792	ugt-36	N.A.			B0393.5	1.69263	3.23246	0.000613146	0.0558709	B0393.5	N.A.
T23F11.2	2.57493	5.95841	4.04502e-05	0.00748377	T23F11.2	N.A.			Y116F11A.1	1.68674	3.21929	0.00859842	0.240577	Y116F11A.1	N.A.
C49A1.3	2.57442	5.95633	0.0141246	0.233323	best-11	N.A.			K01A2.11	1.68625	3.21819	0.0229397	0.400732	cbn-1	cbn-1 encodes a protein that contains a predicted signal peptide and calcium-binding EF-hand motifs.
H12D21.5	2.57309	5.95084	0.0193501	0.285996	H12D21.5	N.A.			ZK75.2	1.68369	3.21248	0.00871396	0.24255	ins-2	ins-2 encodes an insulin-like peptide.
F10F2.6	2.56932	5.93528	0.0257964	0.339193	clec-152	N.A.			C52E2.7	1.6695	3.18105	0.00349706	0.146464	fbxb-96	N.A.
T09A12.1	2.56852	5.932	0.00250262	0.0842685	T09A12.1	N.A.			ZK328.8	1.666	3.17334	0.005734	0.196765	tbx-7	tbx-7 encodes one of 21 C. elegans T-box transcription factors\; in large-scale RNAi screens for early embryonic defects, loss of tbx-7 activity results in no obvious abnormalities\; thus, the precise role of tbx-7 in C. elegans development and\/or behavior is not yet known.
W03G9.6	2.56843	5.93164	0.00377782	0.106089	paf-1	paf-1 encodes one of two C. elegans homologs of mammalian Type II platelet-activating factor-acetylhydrolase (PAF-AH).			Y69A2AR.29	1.66563	3.17252	0.00194396	0.104865	ngn-1	ngn-1 encodes a member of the neurogenein family that is required for axonal guidance and connectivity of a subset of neurons, and also affects locomotion.
F49A5.3	2.56827	5.93098	0.00610966	0.143833	clec-22	N.A.			M03A1.7	1.66351	3.16786	0.00056779	0.0528084	dao-2	dao-2 encodes a (putatively) secreted protein with a DB module\; dao-2 is down-regulated in daf-2 mutant adults by comparison with normal adults, and thus may be involved in dauer formation.
C14A6.6	2.56612	5.92213	0.000247321	0.0237156	C14A6.6	N.A.			F20A1.7	1.66248	3.1656	0.013623	0.307173	twk-11	twk-11 encodes one of more than 40 TWK (two-P domain K+) potassium channels in C. elegans that contain two pore regions and four transmembrane domains\; orthologous to C. briggsae CBG19123 with some similarity to Drosophila CG6004.
T22H9.3	2.56116	5.90182	7.10235e-05	0.0106373	wago-10	N.A.			F21D9.1	1.65883	3.1576	0.0465338	1	F21D9.1	This gene encodes a protein containing an F-box, a motif predicted to mediate protein-protein interactions either with homologs of yeast Skp-1p or with other proteins.
K09D9.11	2.55973	5.89596	0.0117532	0.211236	K09D9.11	N.A.			T08H4.3	1.65745	3.15459	0.0119759	0.285583	ast-1	ast-1 encodes one of ten C. elegans ETS-box transcription factors\; AST-1 is required cell autonomously for proper initiation and maintenance of dopamine (DA) neuron fate\; AST-1 acts to specify DA neuron fate by positively regulating expression of a number of DA neuron-specific genes such as dat-1 and cat-2, which encodes a dopamine transporter and tyrosine hydroxylase, respectively\; AST-1 is a…
F53F4.18	2.55962	5.89551	0.038163	0.424559	F53F4.18	N.A.			Y17G9B.11	1.65189	3.14245	0.0339655	0.488857	Y17G9B.11	N.A.
H04J21.1	2.55321	5.86941	0.00252801	0.0842685	H04J21.1	N.A.			T14B4.7	1.64435	3.12607	0.000441379	0.0496037	dpy-10	A cuticle collagen protein that afffects body morphology and movement and genetically interacts with the sqt-1 collagen gene.
F11G11.4	2.55117	5.86111	0.00232683	0.0808514	F11G11.4	N.A.			M03B6.3	1.64112	3.11908	0.00139574	0.0913738	M03B6.3	N.A.
F32B4.2	2.54974	5.85528	0.00056771	0.0364785	F32B4.2	N.A.			F56A12.1	1.64055	3.11785	0.00164457	0.0985716	unc-39	unc-39 encodes a homeodomain transcription factor that belongs to the Six4\/5 family of homeodomain proteins that includes human Six5\; UNC-39 is required for axonal pathfinding in anterior-derived neurons and for specification of most mesodermal cell types and may regulate a developmental decision between migration and differentiation\; UNC-39 is expressed in the embryo in anterior neurons, post…
Y41E3.18	2.547	5.84417	0.00323089	0.0962884	Y41E3.18	N.A.			DY3.3	1.63694	3.11006	0.000664784	0.0582161	hlh-16	N.A.
C07G1.7	2.54266	5.82661	0.00172183	0.0700359	C07G1.7	N.A.			2RSSE.2	1.63654	3.1092	0.00248695	0.119356	not found
Y39G8C.2	2.54253	5.82611	0.001388	0.0621985	Y39G8C.2	N.A.			Y73E7A.8	1.63652	3.10915	0.0293749	0.457776	Y73E7A.8	N.A.
Y47D7A.13	2.53973	5.8148	0.00040316	0.0313866	Y47D7A.13	N.A.			F09F9.4	1.63439	3.10457	0.00897603	0.247496	F09F9.4	N.A.
F44F4.10	2.53798	5.80774	0.00144681	0.0632016	F44F4.10	F44F4.1 encodes a nematode-specific sperm protein probably required for a normally high ovulation rate\; F44F4.1 has no obvious non-nematode homologs, but does have a putative central coiled-coil domain, and is is paralogous to four other C. elegans proteins (B0207.11, F42G4.6, T08G11.2, and Y81G3A.1)\; F44F4.1(tm332) hermaphrodites show abnormal egg-laying, retaining significantly fewer eggs tha…			Y39A1B.2	1.63279	3.10113	0.0420711	0.539839	ptr-19	ptr-19 encodes an ortholog of Drosophila and human PTCHD3, which definesone of seven paralogous families of sterol sensing domain (SSD)proteins\; PTR-19 is required for normal development in mass RNAi assays\;PTR-19 is expressed in pharynx, hypodermis, nervous system (includinghead neurons), and other cells.
C55B7.10	2.53399	5.79172	0.00397681	0.108764	C55B7.10	N.A.			C44H4.2	1.62672	3.08811	0.00149689	0.094332	let-4	let-4 encodes an extracellular leucine-rich repeat only protein\; let-4 was originally identified in a screen for essential genes, and let-4 mutants exhibit early larval lethality\; let-4 is required for organization of the apical extracellular matrix, and is involved in excretory cell canal morphology and renal function as mutants exhibit excretory canal cysts and impaired renal function.
T20D4.10	2.53328	5.78887	0.000169267	0.019289	T20D4.10	N.A.			ZC84.6	1.624	3.08229	0.0363287	0.505602	ZC84.6	N.A.
Y105C5B.11	2.52807	5.76799	0.00828945	0.171076	Y105C5B.11	N.A.			C03C10.9	1.62283	3.07979	0.0145058	0.315545	not found
F59A6.8	2.52787	5.76721	0.00687731	0.152551	msp-71	msp-71 encodes a protein that belongs to a family of proteins called the Major Sperm Proteins (MSPs) that is conserved in nematodes\; this family consists of closely related, small, basic proteins that make up 15\% of sperm protein\; this multigene family consists of over fifty genes, including many pseudogenes\; MSPs are involved in both extracellular signaling and cytoskeletal functions during …			T03G11.3	1.61211	3.05698	0.0407317	0.531684	T03G11.3	N.A.
Y45F10C.6	2.5254	5.75734	0.0121972	0.215003	Y45F10C.6	N.A.			F22F1.1	1.61024	3.05303	0.000501506	0.0520699	hil-3	N.A.
T13F2.12	2.52244	5.74552	0.0102068	0.19473	ssp-36	N.A.			F52E10.5	1.60836	3.04906	0.0128051	0.293954	ifa-3	ifa-3 encodes an essential intermediate filament protein that is coexpressed with the essential IF protein IFB-1\; IFA-3 is required for survival past early larval stages, correct positioning of excretory canals and body muscles, attachment of cuticle to hypodermis, and locomotion\; IFA-3 forms heteropolymeric intermediate filaments in vitro with an equimolar mixture of IFB-1\; IFA-3 is expressed…
T14D7.3	2.51992	5.73549	0.00213637	0.0774115	snb-6	N.A.			F32E10.3	1.60741	3.04705	0.0298786	0.461033	clec-180	N.A.
F32A11.3	2.51949	5.7338	8.49676e-06	0.00303682	F32A11.3	N.A.			Y17G9B.7	1.605	3.04196	0.0011464	0.0801057	fbxb-77	N.A.
F44G4.5	2.51805	5.72806	0.00372134	0.105445	F44G4.5	N.A.			W06A11.4	1.60201	3.03565	1.05799e-09	1.29709e-06	W06A11.4	N.A.
ZK622.1	2.51584	5.71931	0.00142541	0.0626143	ZK622.1	N.A.			C54G4.4	1.59845	3.02817	0.0440748	0.551591	C54G4.4	N.A.
F47F6.5	2.51572	5.71884	0.000546613	0.0359667	clec-119	N.A.			F52B10.2	1.59497	3.02089	0.00239782	0.117163	hst-3.2	N.A.
F58E6.5	2.51227	5.70517	0.0251262	0.333338	F58E6.5	N.A.			DY3.5	1.59474	3.0204	0.0172817	0.345019	pqn-26	The protein product of this gene is predicted to contain a glutamine\/asparagine (Q\/N)-rich ('prion') domain, by the algorithm of Michelitsch and Weissman (as of the WS77 release of WormBase, i.e., in wormpep77).
C36H8.1	2.51176	5.70317	0.000109305	0.013983	C36H8.1	N.A.			ZC455.10	1.58526	3.00062	0.00351533	0.146773	fkb-4	fkb-4 encodes a peptidylprolyl cis\/trans isomerase homologous to mammalian FK506 immunosuppressant-binding protein 9\; FKB-4 expression is positively regulated by signaling through the DAF-2 insulin receptor-like pathway and in part, through the activity of the DAF-16 fork-head transcription factor suggesting that FKB-4 could play a role in metabolism and longevity\; as loss of FKB-4 function vi…
H34I24.1	2.50783	5.68764	0.00232899	0.0808514	H34I24.1	N.A.			F01E11.1	1.58517	3.00043	0.00142526	0.0928551	ugt-57	N.A.
C31H1.1	2.50495	5.6763	0.00493681	0.125625	C31H1.1	N.A.			F43G9.11	1.58174	2.99332	0.003075	0.135521	ces-1	ces-1 encodes a C2H2-type zinc finger transcription factor that is a member of the Snail family of proteins that includes Drosophila Scratch, Snail, and Slug, and human SNAIL and SLUG\; during development, CES-1 functions as a transcriptional repressor that blocks programmed cell death in specific neurons by inhibiting expression of the cell-death activator EGL-1\; in addition, CES-1 functions to…
Y39B6A.31	2.50132	5.66205	0.00559259	0.136567	Y39B6A.31	N.A.			Y71H2AM.15	1.57775	2.98504	0.000163498	0.0286845	Y71H2AM.15	N.A.
W09C3.2	2.5006	5.65921	0.0026651	0.0865938	W09C3.2	N.A.			Y41C4A.11	1.57687	2.98322	3.30298e-05	0.0116192	Y41C4A.11	Y41C4A.11 encodes a divergent paralog of F38E11.5, the beta' (beta-prime) subunit of the coatomer (COPI) complex.
Y47D3A.10	2.49575	5.64023	0.000128398	0.0160252	tbx-34	tbx-34 encodes a diverged member of the T-box transcription factor family\; by homology, TBX-34 is predicted to function as a transcriptional regulator during development, but as loss of tbx-34 activity via RNAi results in no obvious defects, the precise role of TBX-34 in C. elegans development and\/or behavior is not yet known.			Y116A8C.19	1.57644	2.98233	0.025564	0.422495	Y116A8C.19	Y116A8C.19 encodes a CCCH tandem zinc finger (TZF) protein\; based upon its sequence similarity to C. elegans POS-1, the product of Y116A8C.19 is predicted to function as an RNA-binding protein.
W05B5.2	2.48909	5.61424	0.0405151	0.436811	npr-14	N.A.			T06D8.3	1.57589	2.98119	0.0329258	0.48056	plpr-1	N.A.
C16D2.1	2.48587	5.6017	0.00235381	0.0813873	C16D2.1	N.A.			F15B9.7	1.57043	2.96994	0.00134315	0.0899754	fmi-1	fmi-1 encodes a highly conserved cadherin-like protein with unique domain composition of six EGF and two laminin G domains, a GPS cleavage site and seven-pass transmembrane domain\; fmi-1 plays a crucial role in pioneer axon navigation as well as pioneer-mediated follower navigation\; FMI-1 is required cell autonomously in pioneer and partially non-cell autonomously in the follower\; different do…
F14F7.4	2.4798	5.57818	0.000260157	0.0242084	F14F7.4	N.A.			F52B11.3	1.56631	2.96147	0.00073286	0.0617709	noah-2	noah-2 encodes a PAN and ZP domain-containing protein that is related to the Drosophila extracellular matrix component NompA (no-mechanoreceptor-potential A)\; loss of noah-2 function via RNAi indicates that NOAH-2 activity is essential for molting\; in addition, NOAH-2 appears to be required for embryonic and larval development, reproduction, coordinated locomotion, and the overall health of the…
Y38H8A.3	2.47835	5.57262	0.000479998	0.0338495	Y38H8A.3	N.A.			Y65A5A.1	1.56492	2.95861	0.000795087	0.0639586	Y65A5A.1	N.A.
BE10.1	2.47777	5.57034	0.00055381	0.0361379	BE10.1	N.A.			F57B9.9	1.55643	2.94126	0.0185804	0.356437	abu-13	The protein product of this gene is predicted to contain a glutamine\/asparagine (Q\/N)-rich ('prion') domain, by the algorithm of Michelitsch and Weissman (as of the WS77 release of WormBase, i.e., in wormpep77).
F15H10.2	2.47383	5.55517	1.26127e-06	0.000862382	col-13	col-13 encodes a collagen which is expressed in all stages of development, like sqt-3 (col-1), col-3, col-10, col-11, col-12, and col-14\; collagen genes with this expression profile may be specifically required to construct the L1 cuticle (and, perhaps, less specifically required for cuticles at other stages)\; the amino- and carboxyl-terminal cysteine-rich regions of COL-13 are most closely rel…			Y110A2AL.4	1.55592	2.94021	0.00954107	0.252791	Y110A2AL.4	N.A.
D2063.4	2.46219	5.51051	0.000134783	0.0165449	irld-1	N.A.			C33D12.7	1.55534	2.93903	0.014385	0.315545	ceh-30	ceh-30 encodes a homeodomain protein most similar to Drosophila and mammalian BarH1 (OMIM:605211) which function in neuronal cell fate determination\; CEH-30 functions as a key regulator of sex-specific apoptosis\; ceh-30 transcription is under the regulatory control of TRA-1A and UNC-86.
F13E9.5	2.45809	5.49489	8.58304e-05	0.0120515	F13E9.5	N.A.			K08H2.4	1.55286	2.93398	0.00177951	0.100834	K08H2.4	N.A.
F54H12.7	2.45475	5.48217	0.000187107	0.0201537	F54H12.7	N.A.			Y73C8C.2	1.54499	2.91802	0.00422948	0.162968	clec-210	N.A.
Y38H8A.2	2.45249	5.47358	0.00135483	0.0617566	Y38H8A.2	N.A.			C45G7.4	1.54325	2.9145	0.00899251	0.247496	C45G7.4	N.A.
Y6E2A.9	2.44434	5.44278	0.0283257	0.361139	sfxn-1.3	N.A.			C46A5.3	1.54068	2.90932	0.0340845	0.48943	col-14	col-14 encodes a collagen protein that affects vulval morphology in a large-scale RNAi screen\; mRNA expressed in embryos and transcript levels peak during each larval stage.
C30G7.3	2.44168	5.43273	0.000494091	0.0338827	C30G7.3	N.A.			Y73B6BL.12	1.53907	2.90606	0.000162403	0.0286845	Y73B6BL.12	N.A.
F47H4.12	2.43914	5.42319	0.00966092	0.188029	F47H4.12	N.A.			Y38F2AL.1	1.53714	2.90219	0.000657398	0.0581986	nsy-4	nsy-4 encodes a member of the PMP22\/EMP\/claudin\/calcium channel gamma subunit family\; nsy-4 is worm-specific, with obvious homologs only in C. elegans\; nsy-4 functions with nsy-5 to induce the AWC chemosensory neuron ON fate by regulating the activity of the UNC-2\/UNC-36 calcium channel.
F44E7.6	2.43909	5.42299	0.0461132	0.46672	fbxa-183	This gene encodes a protein containing an F-box, a motif predicted to mediate protein-protein interactions either with homologs of yeast Skp-1p or with other proteins\; this gene's encoded protein also contains an FTH\/DUF38 motif, which may also mediate protein-protein interaction.			C08F1.10	1.53556	2.899	6.0246e-05	0.0176626	C08F1.10	N.A.
Y46C8AL.1	2.43657	5.41352	5.36907e-05	0.00848328	clec-73	N.A.			C01G6.1	1.52867	2.88519	0.000285972	0.039147	aqp-2	aqp-2 encodes, by alternative splicing, two isoforms of an biochemically atypical aquaglyceroporin\; when expressed in Xenopus oocytes, AQP-2 increases water permeability 5- to 11-fold, and urea permeability 4.5-fold, but has no effect on glycerol permeability\; AQP-2::GFP fusion proteins are expressed predominantly in the excretory cell and more weakly in muscle, motor neurons, and hypodermis\; …
K06H7.8	2.43637	5.41279	0.00131246	0.0609103	K06H7.8	N.A.			ZC513.8	1.52413	2.87613	0.00336056	0.143419	col-43	col-43 encodes a collagen that is individually dispensable for viability and gross morphology in mass RNAi screens.
T05C12.3	2.4349	5.40727	0.0037475	0.105995	decr-1.3	N.A.			T01D3.3	1.52341	2.8747	0.00878017	0.243614	T01D3.3	N.A.
F38A3.2	2.4344	5.40539	4.54607e-11	1.02131e-07	ram-2	ram-2 encodes a cuticle collagen that interacts with unc-6 to affect ray cell migration, and interacts with unc-5 and unc-6 to affect embryonic viability\; also affects ray morphology in males such that the structural cells and the hypodermis of the rays are swollen in mutants.			T22A3.2	1.51983	2.86757	0.00105492	0.0760787	hsp-12.1	hsp-12.1 encodes a member of the small heat shock family of proteins.
ZK930.4	2.43239	5.39786	0.00453631	0.118366	ZK930.4	N.A.			K03D10.1	1.51738	2.86271	0.000834644	0.0643201	kal-1	kal-1 encodes a cell surface protein that contains a WAP-type protease inhibitor domain and Type III fibronectin domains and is the C. elegans ortholog of human KAL-1, mutated in the X-linked form of the neurological disorder Kallmann syndrome\; in C. elegans, both kal-1 loss-of-function mutations and kal-1 overexpression result in similar phenotypes that indicate KAL-1 activity is required for e…
Y71G12B.27	2.43116	5.39326	0.00676522	0.15165	Y71G12B.27	N.A.			C40A11.2	1.51442	2.85684	9.31207e-05	0.022695	C40A11.2	N.A.
Y43C5A.4	2.43093	5.39242	0.00790196	0.165909	Y43C5A.4	N.A.			C24H12.2	1.51028	2.84866	0.0321522	0.477479	C24H12.2	N.A.
B0432.12	2.43067	5.39144	0.0186791	0.279227	clec-117	N.A.			F46E10.2	1.50965	2.84741	0.00014793	0.0280983	F46E10.2	N.A.
T02E1.1	2.42916	5.38579	0.000950562	0.0504345	spe-12	spe-12 encodes a novel protein with a single transmembrane domain\; spe-12 is required for hermaphrodite spermatogenesis or sperm activation but not for male-derived sperm activation (sperm activation is the morphogenesis of a round non-motile spermatid to an amoeboid crawling sperm)\; however, mutant hermaphrodite spe-12 spermatids can transactivate and form functional sperm during mating with m…			F39H12.4	1.50353	2.83536	0.00592048	0.201192	igcm-1	igcm-1 encodes a protein containing immunoglobulin and fibronectin repeats\; igcm-1 promoter::gfp fusions are expressed in the labial neurons, including the sheath and socket cells, as well as in the pharynx and lateral hypodermis.
T08G3.7	2.42888	5.38477	0.00334879	0.0977052	T08G3.7	N.A.			F26D10.12	1.50016	2.82875	0.00605714	0.204119	clec-196	N.A.
K08C9.2	2.42078	5.3546	2.70456e-06	0.00132912	K08C9.2	N.A.			C08F1.11	1.49777	2.82405	0.014196	0.3154	C08F1.11	N.A.
Y50E8A.9	2.41874	5.34703	0.00663145	0.150052	scrm-7	scrm-7 encodes a putative phospholipid scramblase homologous to humanPLSCR1-5, and paralogous to other C. elegans SCRMs (e.g., SCRM-1)\;scrm-7(RNAi) animals have no obvious phenotype.			T26H2.10	1.49748	2.82349	0.0144995	0.315545	T26H2.10	N.A.
Y43C5B.2	2.41764	5.34296	0.0454751	0.463621	Y43C5B.2	N.A.			F31E9.6	1.49462	2.8179	4.18499e-06	0.00245386	F31E9.6	N.A.
M05B5.3	2.40991	5.31443	0.00255232	0.0845086	M05B5.3	N.A.			F29F11.5	1.49248	2.81371	0.0326978	0.479491	ceh-22	ceh-22 encodes an NK-2 family homeodomain factor homologous to Drosophila TINMAN and vertebrate Nkx2-5 proteins\; CEH-22 activates pharyngeal muscle gene expression in combination with PHA-1 and is required for normal pharyngeal development\; ceh-22 is the first gene known to be expressed in pharyngeal muscles, being exclusively active in that tissue.
Y39B6A.18	2.40965	5.31347	0.00176276	0.0707173	Y39B6A.18	N.A.			C28A5.4	1.48691	2.80287	0.000370134	0.0432277	ceh-43	ceh-43 encodes a homeobox protein of the Distal-less (Dll) class that is required for development of the anterior hypodermis during embryonic morphogenesis for cell adhesion\; ceh-43 affects embryonic and larval viability\; it is predominantly expressed in the head hypdodermis, neuronal support cells and CAN neurons.
C04G2.8	2.40835	5.30866	0.0200699	0.291969	spch-1	spch-1 encodes one of three C. elegans small, highly basic proteins that have similarity to mouse testis-specific histone H1, the human nucleotide binding and splicing-associated protein SON, and the mollusk protamine-like SNBPs (sperm nuclear basic proteins)\; spch-1(RNAi) has been reported to result in low penetrance male meiosis defects\; SPCH-1 associates specifically with spermatogenic meiot…			Y116A8B.1	1.48587	2.80086	0.0187566	0.356545	Y116A8B.1	N.A.
C47A4.3	2.40182	5.28468	0.00573142	0.138665	C47A4.3	N.A.			C50F2.8	1.48469	2.79858	0.0192441	0.360063	magu-3	N.A.
Y69E1A.8	2.39862	5.27299	0.00424077	0.113612	Y69E1A.8	N.A.			F09E10.6	1.48338	2.79603	0.0335379	0.486213	F09E10.6	N.A.
F10G8.1	2.39744	5.26866	0.000990459	0.0512367	F10G8.1	N.A.			R05H5.8	1.4818	2.79298	0.0240556	0.410557	tts-2	N.A.
Y57G11C.6	2.39376	5.25525	0.000309655	0.0270257	ptp-5.2	N.A.			F47F6.1	1.48165	2.79268	0.0113287	0.279302	lin-42	lin-42 encodes three PAS domain-containing proteins orthologous to insect and vertebrate Period proteins that function in regulation of circadian rhythms\; during larval development, lin-42 functions in the heterochronic pathway to regulate developmental switches that occurs in multiple tissues, including the hypodermis, gonad, sex myoblasts, and vulva\; genetic analysis suggests that, in the hyp…
H32C10.3	2.39366	5.25488	0.00971802	0.188441	dhhc-13	N.A.			F55B12.11	1.4801	2.78967	0.0177506	0.348737	F55B12.11	N.A.
F13G11.2	2.39054	5.24352	0.0121089	0.214683	irld-4	N.A.			T08E11.6	1.47512	2.78006	0.00988206	0.257277	fbxb-10	This gene encodes a protein containing an F-box, a motif predicted to mediate protein-protein interactions either with homologs of yeast Skp-1p or with other proteins\; its encoded protein also contains a Pfam-B45 motif of presently unknown function.
C47A4.5	2.39036	5.24288	0.0110635	0.204412	C47A4.5	N.A.			F13E9.11	1.46783	2.76605	0.00333613	0.142829	F13E9.11	N.A.
H06H21.9	2.38967	5.24039	0.00103541	0.0524134	mpz-4	H06H21.9 encodes a Caenorhabditis-specific protein with two PDZ domainsthat inhibits CEP-1- and HUS-1-dependent germline apoptosis, as doBMK-1, RAD-50, and RAD-51.			C09F9.2	1.46742	2.76528	0.00222892	0.113004	C09F9.2	N.A.
D1022.9	2.38515	5.22398	0.0129392	0.221176	D1022.9	N.A.			C03A3.1	1.46621	2.76295	0.000791659	0.0639586	C03A3.1	N.A.
F21H7.2	2.38265	5.21493	0.000566445	0.0364785	F21H7.2	N.A.			T10B9.3	1.46593	2.76242	0.0487555	0.579775	cyp-13A6	cyp-13A6 encodes one of ~80 C. elegans cytochrome P450s: membrane-associated, heme-containing NADPH-dependent monooxygenases that catalyze the oxidative metabolism of a variety of exogenous compounds and endogenous substrates\; loss of cyp-13A6 activity in large-scale RNAi screens results in decreased and\/or slow growth and cadmium hypersensitivity\; cyp-13A6 expression is upregulated in respons…
Y57G11A.2	2.37996	5.20521	1.1496e-05	0.00377197	Y57G11A.2	N.A.			C09G5.4	1.46569	2.76196	0.0177755	0.348737	col-39	col-39 encodes a collagen that is individually dispensable for viability and gross morphology in mass RNAi screens\; the amino- and carboxyl-terminal cysteine-rich regions of COL-39 are most closely related to those of COL-8, COL-19, and COL-35.
F42G8.8	2.37689	5.19415	0.000238063	0.0234546	F42G8.8	N.A.			T24B8.3	1.4626	2.75605	0.000292278	0.039147	T24B8.3	N.A.
F54B3.2	2.37629	5.19199	0.018602	0.2788	F54B3.2	N.A.			B0272.1	1.461	2.753	0.0116786	0.282843	tbb-4	N.A.
K02E11.1	2.37533	5.18855	2.2654e-05	0.00574607	ent-3	N.A.			Y38E10A.5	1.46094	2.75288	0.014514	0.315545	clec-4	clec-4 encodes a C-type lectin\; clec-4 expression is upregulated in response to stressors, including pathogens and ionizing radiation.
Y59E9AL.3	2.37306	5.18038	3.81051e-06	0.00171212	Y59E9AL.3	N.A.			Y50E8A.5	1.45896	2.7491	0.0275805	0.4407	Y50E8A.5	N.A.
F36A2.11	2.373	5.18019	0.000962124	0.0504345	F36A2.11	N.A.			C42D8.5	1.4561	2.74366	0.0105525	0.268007	acn-1	acn-1 encodes an ACE-like protein required for larval development and adult morphogenesis, and probably for cell fusion in larval seam cells\; ACN-1 lacks not only the HExxH consensus metallopeptidase motif, but also other active site residues found in the sequence HEAI\/VxD of mammalian and insect ACEs\; acn-1 is expressed in hypodermal cells, vulval precursor cells, and ray papillae in the male…
Y37E11B.10	2.37259	5.17869	1.10688e-05	0.00377197	Y37E11B.10	N.A.			F09B12.1	1.45106	2.73408	0.0400603	0.525539	mlt-9	N.A.
F23B2.7	2.37189	5.17619	0.011131	0.205213	F23B2.7	N.A.			R07E3.6	1.44516	2.72293	0.00343046	0.145026	R07E3.6	N.A.
Y37E3.19	2.37166	5.17537	0.0393893	0.430164	Y37E3.19	N.A.			K02E10.4	1.44502	2.72267	0.000575478	0.0531568	K02E10.4	N.A.
F37A8.1	2.37157	5.17502	0.003239	0.0962884	F37A8.1	N.A.			F36H5.4	1.44483	2.72231	0.00120401	0.0832678	F36H5.4	N.A.
Y53F4B.36	2.37148	5.17471	0.016265	0.257139	Y53F4B.36	N.A.			F55F8.1	1.43807	2.70957	0.0320408	0.477479	ptr-10	ptr-10 encodes an ortholog of Drosophila and human PTCHD3, which definesone of seven paralogous families of sterol sensing domain (SSD)proteins\; PTR-10 is weakly required for normal molting from L4 to adultstages\; however, PTR-10 in conjunction with PTR-1 and PTR-6 is stronglyrequired for both molting and viability, with triple ptr-1\/-6\/-10 RNAianimals showing pronounced molting defects and l…
Y41C4A.7	2.37133	5.17417	0.0396552	0.431868	Y41C4A.7	N.A.			T19C4.1	1.43589	2.70548	0.0261732	0.42993	T19C4.1	N.A.
Y46G5A.22	2.36452	5.14981	0.00080931	0.0461517	Y46G5A.22	N.A.			C49A1.4	1.43541	2.70459	4.2824e-05	0.0137506	eya-1	eya-1 encodes a protein orthologous to the Eyes absent\/Eya Drosophila protein which is involved in eye development and has protein tyrosine phosphatase \; RNA interference and mutant studies indicate that eya-1 is involved in embryonic and larval tissue morphogenesis as well as larval viability\; eya-1 mutants show increased embryonic cell deaths due to activation of the cell death pathway\; eya…
ZK616.8	2.36163	5.13951	0.000335712	0.0277813	ZK616.8	N.A.			R07C3.5	1.4352	2.7042	0.000827317	0.0642354	fbxc-34	N.A.
F37A4.5	2.35968	5.13256	0.00138825	0.0621985	F37A4.5	N.A.			F32H2.6	1.43425	2.70242	0.016648	0.339147	F32H2.6	N.A.
C06A8.6	2.35685	5.12249	0.000138438	0.0166189	C06A8.6	N.A.			C06E7.4	1.43048	2.69536	0.000296085	0.039147	C06E7.4	N.A.
R105.1	2.3566	5.1216	1.2191e-05	0.00391256	R105.1	N.A.			F31E8.3	1.42887	2.69235	0.0405764	0.53076	tab-1	tab-1 encodes a homeodomain protein homologous to Drosophila bsh (brain-specific homeodomain protein) and the vertebrate BarH-like homeodomain protein 1\; TAB-1 is required, during early larval development, for backward movement in response to anterior touch with a wire, while during later larval stages, TAB-1 is required for response to gentle touch with a hair\; TAB-1 expression begins in the e…
C10H11.7	2.3546	5.11453	0.00229161	0.0807281	C10H11.7	N.A.			W09G12.4	1.42509	2.68531	0.0451641	0.559305	dsl-1	dsl-1 encodes a secreted protein with a single DSL and EGF domain inseries, resembling Delta\/LAG-2\; DSL-1, with APX-1 and LAG-2, iscollectively required for LIN-12\/Notch-mediated lateral signalling duringpostembryonic vulval development\; DSL-1, when misexpressed by lag-2sequences, can rescue the larval-lethal and anchor cell phenotypes oflag-2(q420ts)\; dsl-1(RNAi) animals have abnormal vulva…
F44D12.8	2.35316	5.10942	0.00634571	0.147204	F44D12.8	N.A.			F58G6.9	1.41799	2.67213	1.2523e-06	0.000938254	F58G6.9	N.A.
D1081.5	2.35233	5.10649	0.000818102	0.0461517	D1081.5	N.A.			T02E9.5	1.41287	2.66267	0.00152427	0.0951683	T02E9.5	N.A.
T10B5.2	2.34679	5.08693	0.00469768	0.121506	T10B5.2	N.A.			F57G9.3	1.41074	2.65874	0.030449	0.464519	F57G9.3	N.A.
ZK1010.5	2.34514	5.08108	2.24089e-05	0.00574607	ZK1010.5	N.A.			F11C1.6	1.40896	2.65545	0.00060428	0.0554375	nhr-25	nhr-25 encodes a nuclear hormone receptor orthologous to Drosophila Ftz-F1\; NHR-25 is required for embryogenesis, molting, vulval and gonadal development, and hypodermal expression of acn-1\; nhr-25 is expressed in gonads and loaded into embryos as a maternal transcript\; nhr-25 is zygotically expressed in progeny of the E cell, and then in hypodermis and gut\; the role of NHR-25 in molting may …
C01G10.14	2.34326	5.07448	0.00767629	0.162863	C01G10.14	N.A.			F29C4.8	1.4021	2.64286	0.00601835	0.203417	col-99	N.A.
F44G3.7	2.34279	5.07284	0.00128541	0.0605222	F44G3.7	N.A.			K12H4.1	1.40174	2.64221	0.00538372	0.190234	pros-1	pros-1 encodes a homeodomain protein that is the C. elegans homolog of Drosophila prospero and mammalian Prox1 (Prospero-related homeobox)\; PROS-1 is required for excretory canal growth, and loss of pros-1 function in large-scale RNAi screens has been reported to result in locomotion defects, slow growth, and larval lethality\; in regulating excretory canal growth, PROS-1 functions via regulatio…
C09H5.7	2.34219	5.07073	0.00180709	0.0715827	C09H5.7	N.A.			K11G9.4	1.39867	2.63658	0.0149751	0.319548	egl-46	egl-46 encodes a transcription factor with similarity to the TFIIA-like zinc-finger protein family\; egl-46 activity is required for coordinated locomotion, morphology and process formation of the touch cells, male mating efficiency, HSN cell migration, differentiation, and axonal outgrowth, serotonin production and also terminal divisions of the Q neuroblasts\; egl-46 acts to inhibit touch cell …
F16C3.4	2.34033	5.06419	0.0213477	0.305311	F16C3.4	N.A.			F14B4.1	1.39863	2.63652	0.00303893	0.134976	F14B4.1	N.A.
F22B3.8	2.33975	5.06214	0.0265702	0.346108	F22B3.8	N.A.			Y51A2D.15	1.39836	2.63602	0.0013477	0.0899754	grdn-1	N.A.
F36H1.3	2.33743	5.05403	0.00721188	0.157739	F36H1.3	N.A.			T23D8.8	1.39623	2.63213	0.0102696	0.263094	cfi-1	cfi-1 encodes a DNA-binding protein containing an AT-rich interaction domain (ARID) that affects differentiation of the URA sensory neurons, AVD, and PVC interneurons\; acts downstream of UNC-86 and LIN-32 in controlling URA and IL2 cell fate, and is expressed in some neurons and muscle cells.
C38C10.3	2.33499	5.04548	0.00502305	0.12669	C38C10.3	N.A.			F58D2.1	1.38956	2.61999	0.0192538	0.360063	gadr-1	N.A.
Y105C5B.17	2.33271	5.0375	0.00858229	0.174332	Y105C5B.17	N.A.			F48E3.9	1.38895	2.61888	0.0219921	0.38922	F48E3.9	N.A.
K05F1.9	2.33054	5.02994	2.54803e-05	0.00616466	K05F1.9	N.A.			Y38H6C.14	1.38716	2.61563	0.029396	0.457776	famh-161	N.A.
W09C5.4	2.32934	5.02574	0.0220229	0.310055	ins-33	ins-33 encodes an insulin-like peptide of the insulin superfamily of proteins (OMIM:176730, 147440)\; INS-33 is one of 38 insulin-like peptides in C. elegans\; loss of INS-33 function can result in embryonic lethality, slow growth, and lack of coordination\; additionally, INS-33 appears to be a direct downstream target of LIN-14, a nuclear protein and key regulator of the temporal sequence of pos…			Y69A2AR.25	1.37763	2.5984	0.0265496	0.433473	Y69A2AR.25	N.A.
C56C10.6	2.32589	5.01374	0.00847274	0.172916	C56C10.6	N.A.			F13H8.8	1.37733	2.59787	0.0235243	0.405599	F13H8.8	N.A.
F44D12.7	2.32511	5.01103	0.00557595	0.136372	msd-3	N.A.			ZK938.2	1.37696	2.59721	0.000101316	0.0239711	arrd-4	N.A.
C55C3.6	2.32503	5.01076	0.0221999	0.311711	C55C3.6	N.A.			B0304.1	1.37613	2.59571	0.00483548	0.179645	hlh-1	hlh-1 encodes a basic helix-loop-helix (bHLH) transcription factor that is the C. elegans ortholog of the myogenic regulatory factor (MRF) subgroup of bHLH proteins\; in C. elegans, HLH-1 activity is required during embryogenesis for proper bodywall muscle development and function, but not for bodywall muscle cell fate specification, per se: hlh-1 null mutants generate the normal number of bodywa…
C46E10.1	2.32138	4.99809	0.000674148	0.0417388	C46E10.1	N.A.			Y51H4A.4	1.37123	2.5869	0.00534694	0.18976	zip-7	N.A.
C34H4.4	2.31723	4.98374	0.00472601	0.121838	col-107	N.A.			H25K10.1	1.36982	2.58438	0.0415456	0.537323	H25K10.1	N.A.
F09C12.8	2.31569	4.97842	0.000230175	0.0232034	F09C12.8	F09C12.8 encodes an ortholog, predicted to be catalytically inactive, ofBombyx mori ecdysteroid phosphate phosphatase (EPP), human STS1(OMIM:609201) and human UBASH3A (OMIM:605736)\; F09C12.8 is alsoparalogous to C. elegans C52E4.7, F53B6.7, F55A11.11, and T07F12.1.			Y25C1A.6	1.36908	2.58306	0.0123815	0.28817	Y25C1A.6	N.A.
T13F2.9	2.31496	4.9759	1.07198e-06	0.000802757	T13F2.9	N.A.			ZK265.7	1.36562	2.57688	0.0121277	0.287293	ZK265.7	N.A.
F53B2.5	2.3134	4.97054	0.000673776	0.0417388	F53B2.5	N.A.			F13H10.5	1.3652	2.57611	0.0121521	0.287293	F13H10.5	N.A.
F15H10.1	2.31064	4.96103	8.15658e-06	0.00298303	col-12	col-12 encodes a member of the collagen superfamily containing collagen triple helix repeats (20 copies)\; expressed throughout development but expression peaks after each larval molt when new cuticle is being secreted and deposited, and after the L4 to adult larval molt.			Y37E11AL.5	1.36087	2.5684	0.00675473	0.215107	not found
C10G11.1	2.30568	4.94401	0.0399512	0.433557	C10G11.1	N.A.			M28.1	1.36069	2.56807	0.0169771	0.343058	cutl-9	N.A.
C09B9.4	2.30303	4.93493	3.07878e-05	0.00650597	C09B9.4	N.A.			F26A10.2	1.35758	2.56255	0.017385	0.345294	F26A10.2	F26A10.2 encodes a protein with four zinc-finger domains and a glutamine\/asparagine-rich domain, that is required for maintenance of the germline and for locomotion\; F26A10.2(RNAi) animals are uncoordinated and have sterile progeny.
C34B2.3	2.30253	4.93322	0.000216104	0.0222121	C34B2.3	N.A.			F29G9.1	1.35708	2.56166	0.00855443	0.240344	F29G9.1	N.A.
ZK354.2	2.30075	4.92715	1.24852e-05	0.00392685	ZK354.2	N.A.			C26C6.7	1.33782	2.5277	0.0252913	0.419531	glb-8	glb-8 encodes a globin with no obvious function in mass RNAi assays\; glb-8 expression is induced by anoxia in a HIF-1 dependent manner, although it is also paradoxically upregulated in a hif-1 mutant background\; glb-8 expression is downregulated in a daf-2(e1370) mutant background under normoxic conditions\; glb-8 expression is lower in L3 larvae than in young adults or dauers.
T27A3.4	2.30054	4.92643	0.0305019	0.376509	spch-3	spch-3 encodes one of three C. elegans small, highly basic proteins that have similarity to mouse testis-specific histone H1, the human nucleotide binding and splicing-associated protein SON, and the mollusk protamine-like SNBPs (sperm nuclear basic proteins)\; SPCH-3 associates specifically with spermatogenic meiotic and mature sperm chromatin.			T05E11.9	1.33123	2.51618	1.63701e-06	0.00116193	T05E11.9	N.A.
Y47D7A.15	2.30023	4.92535	0.0495436	0.480999	Y47D7A.15	N.A.			H19M22.3	1.33036	2.51465	0.00678931	0.215437	zmp-2	N.A.
C30H6.2	2.29915	4.92168	0.00338586	0.0980591	zipt-17	N.A.			F54C9.4	1.32562	2.50641	0.0108622	0.272789	col-38	col-38 encodes a member of the collagen superfamily containing collagen triple helix repeats (20 copies) required for normal body morphology.
F49E11.7	2.29816	4.9183	0.0214918	0.305311	F49E11.7	N.A.			Y63D3A.2	1.32157	2.49939	0.00810974	0.233194	fbxb-100	This gene encodes a protein containing an F-box, a motif predicted to mediate protein-protein interactions either with homologs of yeast Skp-1p or with other proteins.
F19B6.4	2.29387	4.90371	0.00168839	0.0698725	wht-5	N.A.			C34G6.6	1.32021	2.49703	0.00765692	0.227448	noah-1	noah-1 encodes a PAN and ZP domain-containing protein that is related to the Drosophila extracellular matrix component NompA (no-mechanoreceptor-potential A)\; loss of noah-1 function via RNAi indicates that NOAH-1 activity is essential for molting\; in addition, NOAH-1 appears to be required for embryonic and larval development, vulval development, coordinated locomotion, and normal body morphol…
Y39G10AR.25	2.29383	4.90355	0.00634517	0.147204	peel-1	N.A.			C16C4.6	1.31723	2.49187	0.0295104	0.4585	fbxb-98	This gene encodes a protein containing an F-box, a motif predicted to mediate protein-protein interactions either with homologs of yeast Skp-1p or with other proteins\; its encoded protein also contains a Pfam-B45 motif of presently unknown function.
F38E1.3	2.29308	4.90102	0.00404979	0.110376	F38E1.3	N.A.			M03D4.4	1.3145	2.48717	0.0153141	0.322996	M03D4.4	N.A.
Y54G2A.24	2.28914	4.88763	0.0218524	0.309317	Y54G2A.24	N.A.			F45D11.13	1.31432	2.48685	0.046256	0.565328	fbxb-30	N.A.
F01G10.5	2.28661	4.87908	0.00310222	0.0938282	F01G10.5	N.A.			C36F7.4	1.31331	2.4851	0.0313637	0.471015	rig-5	N.A.
C38C3.3	2.28391	4.86996	4.65443e-05	0.00777816	C38C3.3	N.A.			Y7A9D.1	1.31313	2.48481	0.0040496	0.159221	Y7A9D.1	N.A.
F23B12.1	2.28277	4.86613	0.017689	0.270076	F23B12.1	N.A.			T03D3.5	1.31226	2.4833	8.22681e-05	0.0212237	T03D3.5	N.A.
Y37D8A.5	2.28106	4.86035	3.3386e-05	0.00679505	Y37D8A.5	N.A.			H24O09.2	1.31031	2.47995	0.0378606	0.514173	fbxb-72	N.A.
K09C6.1	2.27664	4.84549	0.00683086	0.152372	not found				H19N07.3	1.30741	2.47496	2.80558e-08	3.15301e-05	scb-1	N.A.
K07F5.4	2.27622	4.84407	0.0144354	0.236378	kin-24	N.A.			F40G9.20	1.30613	2.47277	0.0484218	0.578267	F40G9.20	N.A.
F15B9.1	2.27431	4.83765	3.01008e-08	3.39985e-05	far-3	N.A.			Y45G5AM.5	1.30037	2.46291	0.00189016	0.103454	Y45G5AM.5	N.A.
K07H8.5	2.27261	4.83198	0.0170321	0.26311	K07H8.5	N.A.			ZK783.1	1.29954	2.46151	0.00195196	0.104877	fbn-1	fbn-1 encodes a protein homologous to the human extracellular matrix protein fibrillin-1 (FBN1)\; in C. elegans, fbn-1 activity is required for completion of molting, particularly the L3\/L4 or L4\/Adult molts.
T25D10.5	2.27248	4.83153	0.0156045	0.249894	btb-2	N.A.			C10G8.6	1.29462	2.45313	0.00795866	0.22983	ceh-34	ceh-34 encodes a homeodomain protein, homologous to human SIX2 (OMIM:604994)\; ceh-34 activity is required for regulation of the programmed cell death of a pharyngeal neuron, the sister of the M4 motor neuron\; CEH-34 binds the egl-1 5'-regulatory region in vitro and acts together with EYA-1, with which it physically interacts, to regulate expression of egl-1 to promote programmed cell death of t…
Y116A8C.4	2.27219	4.83057	0.00091629	0.0495175	nep-23	Y116A8C.4 encodes a neprilysin\; neprilysins are thermolysin-like zinc metallopeptidases, found on the outer surface of animal cells, that negatively regulate small signalling peptides (e.g., enkephalin, tachykinin, insulin, and natriuretic peptides) by cleaving them\; Y116A8C.4 has no clear orthologs in other organisms.			F11D5.3	1.2912	2.44732	0.00708631	0.220707	ddr-2	F11D5.3 encodes a putative tyrosine kinase homologous to human RS1 (OMIM:312700, mutated in juvenile X-linked retinoschisis).
C17F3.1	2.2714	4.82791	0.00199053	0.0745312	C17F3.1	N.A.			F59B2.8	1.29109	2.44712	0.025989	0.427423	F59B2.8	This gene encodes a protein containing an F-box, a motif predicted to mediate protein-protein interactions either with homologs of yeast Skp-1p or with other proteins.
F59C6.2	2.27085	4.82608	0.00160948	0.0676758	dhhc-12	N.A.			M01E10.2	1.29044	2.44602	0.0496421	0.583808	dpy-1	dpy-1 encodes a cuticulin\; DPY-1 activity is required for normal body length and alae formation\; dpy-1's site of action is localized to the hyp7 syncytium, based on mosaic analysis.
F18A12.1	2.26947	4.82145	0.00169492	0.0699586	nep-6	F18A12.1 encodes a neprilysin\; neprilysins are thermolysin-like zinc metallopeptidases, found on the outer surface of animal cells, that negatively regulate small signalling peptides (e.g., enkephalin, tachykinin, insulin, and natriuretic peptides) by cleaving them\; F18A12.1 has no clear orthologs in other organisms.			T04D3.2	1.28759	2.4412	0.00672654	0.215107	sdz-30	N.A.
Y48B6A.5	2.26881	4.81925	0.000203952	0.0213823	Y48B6A.5	N.A.			ZK757.2	1.28598	2.43847	0.0236582	0.406958	ZK757.2	N.A.
W01D2.3	2.26802	4.81661	0.00151231	0.0648028	W01D2.3	N.A.			F33H2.8	1.28494	2.43672	0.0230593	0.401781	F33H2.8	N.A.
F40F12.8	2.26542	4.80793	0.0424935	0.445502	F40F12.8	N.A.			ZC132.4	1.28419	2.43545	0.000315914	0.0401046	not found
K08D10.8	2.2601	4.79024	0.000484531	0.0338827	scrm-5	scrm-5 encodes a putative phospholipid scramblase homologous to humanPLSCR1-5, and paralogous to other C. elegans SCRMs (e.g., SCRM-1)\;scrm-5(RNAi) animals have no obvious phenotype.			Y53C12B.6	1.28327	2.4339	0.00568811	0.195688	cutl-2	N.A.
ZK945.6	2.26	4.7899	0.0052091	0.129836	ZK945.6	N.A.			K06A1.3	1.27909	2.42685	0.0227149	0.397319	cutl-16	N.A.
C09B9.2	2.25926	4.78745	3.58908e-05	0.00693986	C09B9.2	N.A.			C40A11.8	1.27634	2.42223	0.043625	0.550511	C40A11.8	N.A.
C04G2.3	2.25654	4.77843	0.000713798	0.0431041	C04G2.3	N.A.			C43C3.3	1.27384	2.41804	0.00727319	0.222418	dyf-7	dyf-7 encodes a protein containing a single-pass transmembrane domain, a small cytoplasmic domain, and a large extra-cellular\/luminal domain related to that of zona pellucida (ZP) proteins, components of the matrix surrounding vertebrate oocytes to which sperm bind\; dyf-7 is required for anchoring dendritic tips during cell body migration: in dyf-7 embryos, neurons are born at the proper positi…
ZK1290.6	2.25625	4.77748	0.00208412	0.0762603	rnh-1.1	rnh-1.1 is one of four C. elegans genes that can encode an RNase H ribonuclease\; when expressed in vitro, RNH-1.1 exhibits RNase H activity\; rnh-1.1 transcripts are expressed from the L3 larval stage through adulthood.			D1044.2	1.27271	2.41616	0.000116031	0.0257862	dex-1	dex-1 encodes a single-pass transmembrane protein with a domain similar to zonaadhesion, a sperm protein that binds the ZP matrix, dex-1 is also predicted to include two domains similar to nidogens, a family of proteins found in especially neural basement membrane\; dex-1 share a domain composition with alpha and beta\; tectorin, two vertebrate inner ear protein found in matrix that anchors the s…
B0252.5	2.25486	4.77289	4.69875e-05	0.00777816	B0252.5	N.A.			F27E11.3	1.2647	2.40278	0.000718868	0.0609727	cfz-2	cfz-2 encodes one of four C. elegans Frizzled homologs, integral membrane proteins that contain an external cysteine-rich domain (CRD) and seven transmembrane domains and that function in a wide variety of species as receptors for Wnt glycoprotein signaling molecules\; CFZ-2 activity is required for cell migration and for vulval development.
AC3.10	2.24369	4.73606	0.0296206	0.37087	spe-10	spe-10 encodes a DHHC-CRD family zinc-finger transmembrane protein with homologs in other eukaryotes and is predicted to be a palmitoyl transferase\; spe-10 is required during spermatogenesis and thus for fertility\; specifically, spe-10 is required for the proper biogenesis and functioning of specialized Golgi-derived fibrous body-membranous organelle (FB-MO) complexes during spermatid formation…			F26B1.7	1.26429	2.40209	0.0306657	0.466769	let-381	let-381 encodes a forkhead transcription factor and was identified in a screen for essential genes\; let-381 is essential for development at different times as mutants exhibit embryonic and early larval lethality, with a few developing to sterile adults\; inactivation of let-381 using RNA interference results in adults with mesodermal cell lineage defects and a reduced number of coelomocytes\; re…
Y69E1A.4	2.24296	4.73368	0.0086847	0.175503	Y69E1A.4	N.A.			Y46B2A.1	1.26149	2.39743	0.00259779	0.121224	fbxc-51	N.A.
Y44A6D.5	2.24253	4.73226	0.0004709	0.0333575	Y44A6D.5	N.A.			C40A11.6	1.2571	2.39015	0.00465524	0.174683	C40A11.6	N.A.
T28F4.3	2.24178	4.72981	0.00129008	0.0605606	T28F4.3	N.A.			T05A7.4	1.25695	2.38989	0.00258294	0.12095	hmg-11	N.A.
C15C6.2	2.23977	4.72321	1.04272e-05	0.00364397	C15C6.2	N.A.			F33E2.5	1.25249	2.38251	0.00606939	0.204119	F33E2.5	N.A.
R08A2.1	2.22718	4.68219	0.00273635	0.0872193	R08A2.1	N.A.			C25B8.4	1.25141	2.38073	0.00368844	0.149376	clec-266	N.A.
C31H1.5	2.22454	4.67363	0.000930146	0.0500941	C31H1.5	N.A.			Y116F11B.10	1.25023	2.3788	0.000823464	0.0642354	Y116F11B.10	N.A.
ZK856.18	2.22197	4.66531	0.0029914	0.0922407	ZK856.18	N.A.			W05E10.3	1.24825	2.37553	0.00047399	0.0507002	ceh-32	ceh-32 encodes a Six\/sine oculis-type homeodomain protein most closely related to the Six3\/6 subfamily that contains Drosophila OPTIX and human SIX3 (OMIM:603714, which when mutated leads to holoprosencephaly 2)\; CEH-32 appears to be essential for development and required for proper head morphogenesis\; during embryogenesis, CEH-32 is expressed in hypodermal and neuronal precursors, and at lat…
F55G11.5	2.22116	4.66268	0.0223755	0.313057	dod-22	N.A.			C08F8.15	1.2477	2.37463	0.012646	0.292027	C08F8.15	N.A.
C28D4.4	2.21978	4.65824	0.00647633	0.148742	C28D4.4	N.A.			R03C1.3	1.24609	2.37198	0.0495284	0.583644	cog-1	cog-1 encodes the C. elegans ortholog of the vertebrate Nkx6 homeodomain proteins\; cog-1 activity is required for multiple aspects of reproductive system development, including connection of uterus to the vulva and vulval cell specification, as well as for specification of left\/right asymmetry in the ASE taste receptor sensory neurons where cog-1 acts in ASER to suppress the ASEL cell fate\; co…
C54G4.3	2.21905	4.65588	0.00358604	0.102721	C54G4.3	N.A.			Y15E3A.1	1.24533	2.37073	0.00309156	0.135807	nhr-91	nhr-91 encodes a conserved nuclear receptor that is orthologous to members of the NR6 subfamily of nuclear receptors that includes Drosophila HR4 and human germ cell nuclear factor (GCNF, OMIM:600281, human and mouse GCNF are expressed primarily in the testis)\; by homology, NHR-91 is predicted to function as a transcription factor that may activate or repress transcription in response to a hormo…
F47B8.11	2.21687	4.64882	5.1505e-05	0.00835018	sss-2	N.A.			C37E2.4	1.24505	2.37027	0.0273032	0.437486	ceh-36	ceh-36 encodes a paired-like homeodomain transcription factor that is one of three orthodenticle (OTX\/OTD) homeodomain proteins in C. elegans (the others being TTX-1 and CEH-37)\; CEH-36 is required broadly for specification of the AWC olfactory neuron and also for establishing the left-right asymmetry of the ASEL and ASER gustatory neurons\; in addition, CEH-36 is sufficient to specify the AFD …
C06C6.7	2.21246	4.63464	0.00639325	0.147204	C06C6.7	N.A.			M01D1.10	1.24269	2.36639	0.0139139	0.311437	fbxb-45	N.A.
C43G2.3	2.21117	4.6305	0.000522206	0.0350787	C43G2.3	N.A.			F58A4.11	1.234	2.35218	0.0233464	0.404171	gei-13	gei-13 encodes a protein, with a BED finger domain (predicted to be DNA-binding) and a glutamine\/asparagine-rich domain\; GEI-13 physically interacts with GEX-3, and is required for normal body shape, cuticle synthesis, and locomotion.
F59A6.4	2.2111	4.63029	0.00526644	0.130837	F59A6.4	N.A.			C05A9.2	1.23166	2.34837	0.000633883	0.0569903	C05A9.2	N.A.
F37E3.3	2.21101	4.62998	0.000416853	0.0319092	comp-1	N.A.			C47G2.2	1.23041	2.34633	0.0194421	0.360387	unc-130	A member of the forkhead domain family of transcription factors that affects the generation of the AWA and ASG chemosensory neurons and is partially required for male tail morphogenesis and embryogenesis\; it is expressed in the AWA and ASG precursors\; it is required for the graded spatial expression of the UNC-129 TGF-beta guidance factor.
C33H5.16	2.21046	4.62824	0.00490737	0.125078	C33H5.16	N.A.			F59C12.1	1.23014	2.3459	0.0051616	0.186121	cdh-9	cdh-9 encodes a member of the cadherin superfamily of transmembrane glycoproteins that mediate homophilic cell-cell adhesion\; as loss of CDH-9 activity via RNA-mediated interference (RNAi) does not result in any abnormalities, the precise role of CDH-9 in C. elegans development and\/or behavior is not yet known.
C50F4.2	2.21004	4.62687	0.000343292	0.0277813	pfk-1.2	pfk-1.2 encodes a 6-phosphofructokinase (E.C. 2.7.1.11), paralogous to PFK-1.1\; pfk-1.2 is required for fertility, full body size, and normally rapid growth in mass RNAi assays\; pfk-1.2 transcripts are enriched during spermatogenesis.			Y55D5A.1	1.22896	2.34399	0.0115221	0.281498	Y55D5A.1	N.A.
F58G1.3	2.20727	4.61801	0.000777001	0.0452471	F58G1.3	N.A.			K02B12.1	1.22862	2.34342	0.00503443	0.183004	ceh-6	ceh-6 encodes a POU family homeodomain protein, homologous to human POU3F4 (OMIM:304400, mutated in conductive deafness 3)\; ceh-6 is required for embryonic viability, locomotion, and molting, and for regulation of ectodermal and excretory function\; ceh-6 activity is also required for transdifferentiation of the Y rectal cell to the PDA neuron during larval development\; CEH-6 is expressed dynam…
C33F10.8	2.20701	4.61717	0.00435586	0.11571	C33F10.8	This gene encodes a protein containing an F-box, a motif predicted to mediate protein-protein interactions either with homologs of yeast Skp-1p or with other proteins\; its encoded protein also contains a Pfam-B45 motif of presently unknown function.			K10D6.2	1.22618	2.33947	0.00973802	0.255655	K10D6.2	K10D6.2 encodes three isoforms of a claudin homolog that may be required for normal cohesion of apical junctions in epithelia\; K10D6.2A-C are worm-specific, with obvious homologs only in C. elegans\; K10D6.2A-C are required for embryonic viability in mass RNAi assays\; claudins are integral membrane proteins with four transmembrane sequences that are found in mammalian tight junctions (TJs), ind…
Y69A2AR.14	2.19774	4.58761	0.00911486	0.180529	Y69A2AR.14	N.A.			F36H5.13	1.22123	2.33145	0.0123097	0.287711	F36H5.13	N.A.
F32B5.1	2.1922	4.57001	0.00329393	0.0968232	F32B5.1	N.A.			F48E3.6	1.22099	2.33106	0.000293371	0.039147	F48E3.6	N.A.
R08C7.5	2.19089	4.56588	0.00334382	0.0977052	R08C7.5	N.A.			F15B10.3	1.21866	2.3273	0.00105006	0.0760787	F15B10.3	N.A.
Y113G7C.1	2.18694	4.55339	0.00102401	0.0524134	Y113G7C.1	N.A.			F39D8.2	1.21143	2.31568	0.0147496	0.316883	psa-3	psa-3 encodes a Meis-related protein\; along with nob-1 and ceh-20, psa-3 is required for the proper asymmetric cell division of the T hypodermal cell\; a PSA-3::GFP reporter fusino is expressed in the T hypodermal cell, head neurons, posterior gut cells, hypodermal cells (hyp7, hyp9, and hyp10), and the P blast cells\; psa-3 expression is regulated by the POP-1 TCF transcription factor, as well …
Y6E2A.10	2.18597	4.55033	0.0229126	0.316628	Y6E2A.10	N.A.			T26E3.2	1.21108	2.31511	0.0426362	0.545158	ndx-1	The ndx-1 gene encodes a NUDIX hydrolase.
C43E11.5	2.18454	4.54582	0.000177352	0.0195038	C43E11.5	N.A.			C47C12.3	1.21096	2.31491	0.0128145	0.293954	ref-2	ref-2 encodes a zinc-finger transcription factor of the Opa\/Zic family and is similar to the human proteins ZIC1 and ZIC2 (zinc finger protein of cerebellum 1\/2)\; ref-2 in elegans is required for both the generation of the Pn.p ventral epideraml cells, and to maintain them in an unfused state, in both hermaphrodites and males, so that sex-specifc structures can be formed\; ref-2 is also requir…
Y38H8A.4	2.18358	4.54278	0.000106968	0.013983	Y38H8A.4	N.A.			M01D1.2	1.20942	2.31244	0.0462304	0.565328	math-34	N.A.
R01H2.2	2.18329	4.54187	0.00766733	0.162863	R01H2.2	N.A.			ZK287.1	1.20842	2.31085	0.032145	0.477479	ZK287.1	N.A.
B0205.13	2.18158	4.5365	5.82632e-07	0.000482235	B0205.13	B0205.13 encodes a small, novel protein conserved in C. remanei and C. briggsae.			F20B10.1	1.20226	2.30099	0.00284194	0.128612	nlr-1	N.A.
F55D12.6	2.18106	4.53487	0.00270311	0.0872193	F55D12.6	N.A.			Y46H3C.5	1.19837	2.29481	0.0273469	0.437486	Y46H3C.5	N.A.
ZK512.8	2.17891	4.52811	0.000177279	0.0195038	ZK512.8	N.A.			Y49F6C.4	1.19257	2.2856	0.00306654	0.135521	bath-10	N.A.
ZC477.10	2.17755	4.52384	0.0154485	0.247648	ZC477.10	N.A.			Y71D11A.1	1.19206	2.28479	0.0121651	0.287293	cdh-12	cdh-12 encodes a cadherin\; by sequence similarity, CDH-12 is predicted to function in cellular adhesion.
C49C8.1	2.17483	4.51532	0.00045145	0.0327166	C49C8.1	N.A.			Y71F9AL.7	1.19169	2.2842	0.048092	0.574973	Y71F9AL.7	N.A.
R13H9.5	2.17426	4.51355	0.0102864	0.195131	R13H9.5	N.A.			F55A4.10	1.18852	2.27918	0.0374054	0.512652	cutl-21	N.A.
K09G1.2	2.17241	4.50775	0.00140456	0.0622199	K09G1.2	N.A.			T28F2.4	1.18513	2.27384	0.00226975	0.11431	jmjc-1	N.A.
F53C3.1	2.17226	4.50729	0.007376	0.159993	F53C3.1	N.A.			R07C3.7	1.1841	2.27222	0.00407577	0.159784	fbxc-29	N.A.
C17H12.3	2.17136	4.50448	0.000135719	0.0165449	C17H12.3	N.A.			C25F6.7	1.18322	2.27082	0.0244068	0.411995	C25F6.7	N.A.
F33D11.2	2.17077	4.50264	0.0230337	0.317465	F33D11.2	N.A.			C13G5.1	1.18108	2.26747	0.0235489	0.405599	ceh-16	ceh-16 encodes a homeodomain protein orthologous to Drosophila and vertebrate Engrailed proteins involved in segment and appendage development\; ceh-16 is an essential gene required for proper specification and differentiation of the lateral seam cells during embryonic development\; in specifying seam cell fates, CEH-16 appears to act as a transcriptional regulator, repressing expression of the e…
F58F12.3	2.16972	4.49935	0.00191789	0.0737177	F58F12.3	N.A.			W01B6.1	1.1805	2.26655	0.00198367	0.10561	cwn-2	cwn-2 encodes one of five C. elegans Wnt signaling molecules that is homologous to mammalian Wnt5\; cwn-2 is required for proper placement of the nerve ring and anterior cells along the anterior\/posterior axis\; cwn-2 also acts redundantly to specify cell fates during vulval development\; CWN-2 appears to be required at the time of nerve ring development (comma stage of embryogenesis) for nerve …
F59A1.15	2.16444	4.48291	0.0135754	0.227598	F59A1.15	N.A.			T09B4.5	1.17858	2.26353	0.000540245	0.0520699	T09B4.5	N.A.
C08F8.6	2.16439	4.48276	0.00131302	0.0609103	C08F8.6	N.A.			R02D5.1	1.17561	2.25888	0.0172036	0.344433	R02D5.1	N.A.
F07A5.2	2.16267	4.47743	7.27948e-05	0.0106988	F07A5.2	N.A.			ZK512.1	1.17374	2.25596	0.0144928	0.315545	ZK512.1	N.A.
Y48E1B.16	2.16232	4.47634	0.00885244	0.176891	clec-145	N.A.			Y73B6BL.9	1.17312	2.25499	0.00201648	0.106011	hil-2	N.A.
T10E10.6	2.16027	4.46998	0.0332837	0.391488	col-170	N.A.			Y82E9BR.17	1.17221	2.25357	0.000137689	0.027307	Y82E9BR.17	N.A.
Y57G7A.5	2.15315	4.44797	0.000997216	0.0514171	Y57G7A.5	N.A.			R11G1.7	1.17107	2.25178	0.0107435	0.270818	R11G1.7	N.A.
C27D8.2	2.15226	4.44524	1.89744e-05	0.00505749	C27D8.2	N.A.			F53B2.6	1.16875	2.24817	0.0059188	0.201192	ham-1	ham-1 encodes a novel protein with a winged helix DNA-binding motif\; ham-1 is required for the asymmetric divisions of several neuroblasts in the developing embryo and may influence their spindle position\; ham-1 mutations also exhibit HSN motor neuron migration defects\; HAM-1 interacts with itself in a yeast two-hybrid screen and observations suggest that its multimerization is required for it…
F54F12.1	2.15043	4.4396	0.00103654	0.0524134	F54F12.1	N.A.			T05A6.1	1.16828	2.24744	0.000928532	0.0695677	cki-1	cki-1 encodes a homolog of the mammalian cyclin-dependent kinase inhibitor p27\/KIP1 that is required for the arrest of cell division in larval blast lineages, dauer larvae and starved L1 larvae\; excess CKI-1 expression prematurely stops cell division while cki-1(RNAi) induces extra cell divisions, indicating that CKI-1 quantitatively regulates the amount of mitosis in postembryonic worms.
F52B11.4	2.14972	4.43741	2.03025e-05	0.00532129	col-133	N.A.			C53C11.5	1.16757	2.24633	0.0464867	0.566213	C53C11.5	N.A.
T27A3.3	2.1497	4.43736	0.000564848	0.0364785	ssp-16	N.A.			Y102A11A.8	1.16667	2.24493	0.00421914	0.162968	igcm-4	N.A.
B0205.10	2.1482	4.43275	0.000214124	0.0222121	B0205.10	N.A.			R13H4.1	1.16583	2.24363	0.0296645	0.459307	nphp-4	nphp-4 encodes an ortholog of human NPHP4 (OMIM:607215, mutated injuvenile nephronophthisis and Senior-Loken syndrome-4) that is requiredfor normal chemotaxis, lifespan, and male mating behavior\; NPHP-4 isexpressed in diverse neurons (amphid and phasmid sensory, URX, labial,male lumbar and cloacal ganglia, and male-specific CEM, HOB and RnB)\;within neurons, NPHP-4 is a ciliary protein, localize…
F55H12.1	2.14795	4.43199	0.00874289	0.175819	snf-2	N.A.			F59D12.4	1.16415	2.24102	0.0439666	0.551567	gpn-1	gpn-1 encodes a glypican, a heparan sulfate proteoglycan anchored to the cell membrane by a GPI linkage, that is orthologous to Drosophila Dally-like (Dlp) and mammalian glypicans (OMIM:312870, mutated in Simpson-Golabi-Behmel overgrowth syndrome)\; by homology, GPN-1 is predicted to function as a cell surface protein that regulates intercellular signaling, perhaps within the context of cell divi…
F48C1.7	2.14673	4.42822	0.00302732	0.0925638	spe-11	spe-11 encodes a novel protein that is required for early embryonic development and for regulating the dynamic morphology of sperm pseudopods\; SPE-11 is one of the few paternally provided proteins known to be essential for embryogenesis\; SPE-11 is first detected in the nuclei of primary spermatocytes and then remains tightly associated with sperm chromatin until fertilization at which point it …			F54A5.2	1.16391	2.24063	0.00939242	0.252573	cutl-20	N.A.
F53G12.7	2.1464	4.42721	0.0303034	0.37583	col-45	col-45 encodes a cuticle collagen.			C45B11.6	1.16316	2.23948	0.0270179	0.437411	C45B11.6	N.A.
F32B5.4	2.14564	4.42487	0.00193909	0.0741949	msrp-1	N.A.			C25B8.1	1.16228	2.23811	0.0129339	0.295639	kqt-1	kqt-1 encodes one of three C. elegans KCNQ-like potassium channel subunits that, with respect to humans, is most similar to the KCNQ2-5 subfamily of channel proteins\; although loss of KQT-1 activity via large-scale RNAi screens results in no obvious abnormalities, KQT-1 likely functions to regulate cellular excitability as expression of KQT-1 in Xenopus oocytes can produce K+ channel currents th…
F27E5.3	2.14417	4.42039	0.0206844	0.298699	F27E5.3	N.A.			T26C12.3	1.15777	2.23113	0.00212128	0.109189	T26C12.3	N.A.
C15H7.3	2.14333	4.41782	0.000943714	0.0504345	C15H7.3	N.A.			EEED8.2	1.15728	2.23036	0.00277026	0.126215	EEED8.2	N.A.
F59A3.13	2.14148	4.41215	0.0354773	0.40873	F59A3.13	N.A.			C10A4.8	1.15543	2.22751	0.0203263	0.368517	mnm-2	N.A.
ZC581.2	2.13847	4.40294	0.0232243	0.318702	ZC581.2	N.A.			T27B1.2	1.15242	2.22287	0.00295336	0.132322	pat-9	N.A.
F52H3.6	2.13808	4.40177	0.000182582	0.019802	F52H3.6	N.A.			H37A05.4	1.15047	2.21986	0.0204706	0.370558	H37A05.4	N.A.
F17E9.5	2.13538	4.39353	0.0134009	0.225392	F17E9.5	F17E9.5 encodes a novel protein conserved amongst nematodes.			Y41D4B.10	1.14942	2.21824	0.00418583	0.162213	dsl-3	dsl-3 encodes a putative secreted protein with single DSL and EGF domainsin series, somewhat like Delta\/LAG-2\; DSL-3 belongs to a nematode-specificfamily of Delta\/LAG-2-like proteins that includes DSL-1, -2, -3, -5, -6,and -7.
K08F4.5	2.13388	4.38898	0.0132795	0.224449	K08F4.5	N.A.			W04B5.2	1.1492	2.2179	0.0277571	0.441951	W04B5.2	N.A.
Y55B1AR.4	2.13067	4.37921	0.000888111	0.0486635	Y55B1AR.4	N.A.			T07C4.2	1.14736	2.21508	0.0402741	0.52783	tbx-8	N.A.
F58A6.9	2.13058	4.37892	0.000133406	0.0165193	F58A6.9	N.A.			K09F6.8	1.14272	2.20798	0.0268027	0.435496	fbxc-25	N.A.
ZK1053.6	2.13032	4.37816	0.00789326	0.165909	ZK1053.6	ZK1053.6 encodes an ortholog of human SLC41A1 (OMIM:610801) and bacterial MgtE\; like its orthologs, ZK1053.6 is predicted to transport Mg(2+) into cells\; ZK1053.6 is paralogous to K07H8.2 and ZK185.2, and has no obvious function in mass RNAi assays.			Y53C10A.4	1.14068	2.20484	0.019702	0.361356	rga-2	N.A.
Y38E10A.17	2.12706	4.36828	0.0475067	0.472321	Y38E10A.17	N.A.			F44E2.4	1.13969	2.20334	0.0429014	0.547242	F44E2.4	N.A.
ZK1248.5	2.12309	4.35626	0.00739343	0.160112	ZK1248.5	N.A.			C32B5.1	1.13969	2.20333	0.00714136	0.220891	fbxc-40	N.A.
Y73F8A.20	2.12043	4.34822	0.00148192	0.0640239	Y73F8A.20	N.A.			K11H12.5	1.13894	2.20218	0.0471966	0.570205	K11H12.5	N.A.
C06A1.3	2.1191	4.34423	3.3703e-05	0.00679505	C06A1.3	N.A.			F25E5.1	1.1387	2.20182	0.000276612	0.038808	F25E5.1	N.A.
C05C12.1	2.11659	4.33667	0.00252923	0.0842685	C05C12.1	N.A.			M110.1	1.13679	2.19891	0.00699908	0.219511	col-76	N.A.
Y53F4B.11	2.11317	4.3264	7.91729e-05	0.0112169	Y53F4B.11	N.A.			C52B9.6	1.13596	2.19764	0.0323971	0.478993	twk-28	N.A.
T06C10.3	2.10955	4.31556	0.00359313	0.102737	T06C10.3	N.A.			C04G2.7	1.13478	2.19585	0.0463037	0.565328	egl-38	egl-38 encodes a paired domain-containing protein that is a member of the PAX2\/5\/8 family of transcription factors\; egl-38 is an essential gene, required for embryonic and larval development\; in addition, EGL-38 activity is also required for fate specification of four uterine cells and rectal epithelial cells in the hermaphrodite and male tail\; in regulating hindgut development EGL-38 acts i…
R08A2.2	2.10867	4.31292	0.00156599	0.0663839	R08A2.2	N.A.			Y73B6BL.21	1.13473	2.19578	0.028158	0.44466	sfrp-1	N.A.
ZC581.6	2.1059	4.30467	0.00551492	0.135889	try-7	N.A.			C41H7.7	1.13434	2.19518	0.0181139	0.352354	clec-3	N.A.
C50H2.7	2.09741	4.27942	0.0371345	0.418621	C50H2.7	N.A.			T04B8.3	1.13294	2.19306	0.00999673	0.25862	arrd-1	N.A.
W01B6.2	2.0972	4.27878	0.000101943	0.013586	ttbk-4	N.A.			C04F6.3	1.13266	2.19263	0.000704543	0.0601358	cht-1	cht-1 encodes a chitinase orthologous to human chitinase-1 (OMIM:600031, mutations are associated with chitotriosidase deficiency)\; CHT-1 is predicted to function as an extracellular O-glycosyl hydrolase that hydrolyzes the glycosidic bond between two or more carbohydrates\; in C. elegans, CHT-1 may play a role in embryogenesis, and may also be required for cuticle degradation during molting and…
F32B6.4	2.09526	4.27302	9.96198e-05	0.0133899	F32B6.4	N.A.			K02E10.1	1.13226	2.19202	0.00173566	0.100086	K02E10.1	N.A.
ZK795.2	2.08939	4.25568	0.00188258	0.0729199	ZK795.2	N.A.			W04A8.4	1.13226	2.19202	0.0128865	0.295054	W04A8.4	N.A.
ZK757.3	2.08813	4.25197	0.000253702	0.0240345	alg-4	alg-4 encodes an Argonaute (AGO) protein that is a member of the AGO clade of Argonaute small RNA-binding proteins\; together with its paralog, alg-3, alg-4 is required for normal brood sizes at elevated temperatures, specifically for the process of spermiogenesis in which spermatids are converted to mobile ameboid sperm\; alg-3\/4 is also required for accumulation of male germline-specific 26G-R…			Y55B1BR.3	1.12851	2.18633	0.00362463	0.148127	cec-8	N.A.
T16H12.6	2.08726	4.24941	6.09593e-05	0.00921775	kel-10	N.A.			K10D3.4	1.12794	2.18546	0.000550419	0.0520699	K10D3.4	N.A.
K09C6.7	2.08599	4.24566	0.000794733	0.0457801	K09C6.7	N.A.			K11D12.4	1.11916	2.17221	0.00320648	0.138598	cpt-4	N.A.
Y116A8C.23	2.08576	4.24498	0.0126554	0.218463	Y116A8C.23	N.A.			B0285.7	1.11902	2.17199	0.00147889	0.0940193	mnp-1	mnp-1 encodes a protein related to the M1 family of metalloproteinases, but whose sequence indicates that it is unlikely to be catalytically active (MNP-1 lacks three of the four essential zinc-binding amino acids)\; during embryonic development mnp-1 activity is required, likely cell autonomously, for migration of muscle cells from their lateral positions to their final positions close to the do…
C29E6.3	2.08479	4.24212	0.0367572	0.417499	pph-2	N.A.			K02D3.1	1.11869	2.1715	0.0383575	0.51735	K02D3.1	N.A.
C05C12.5	2.08458	4.24151	0.00622996	0.146446	C05C12.5	N.A.			Y75B8A.6	1.11186	2.16124	0.00390965	0.15462	Y75B8A.6	The protein product of this gene is predicted to contain a glutamine\/asparagine (Q\/N)-rich ('prion') domain, by the algorithm of Michelitsch and Weissman (as of the WS77 release of WormBase, i.e., in wormpep77).
F47B3.4	2.08374	4.23904	0.0027503	0.0873762	F47B3.4	N.A.			C08C3.3	1.11047	2.15916	0.00945791	0.252573	mab-5	mab-5 encodes a homeodomain transcription factor related to the Antennapedia, Ultrabithorax, and abdominal-A family of homeodomain proteins\; during postembryonic development, mab-5 is required cell autonomously for specification of posterior cell fates, including hypodermal and neuronal fates, programmed cell deaths, cell proliferation and migration, and fate specification of the male-specific c…
D2045.5	2.08315	4.2373	0.00397223	0.108764	D2045.5	N.A.			Y56A3A.15	1.10757	2.15483	0.0100295	0.25862	fbxb-24	This gene encodes a protein containing an F-box, a motif predicted to mediate protein-protein interactions either with homologs of yeast Skp-1p or with other proteins.
C16C8.18	2.0829	4.23659	0.00117383	0.0571506	C16C8.18	N.A.			C01G5.9	1.10321	2.14833	0.0145945	0.316378	C01G5.9	N.A.
C32E12.1	2.08155	4.2326	0.000235888	0.0234546	C32E12.1	N.A.			Y71A12B.11	1.10117	2.14528	0.00361624	0.148127	Y71A12B.11	N.A.
Y66D12A.11	2.08088	4.23067	0.00723942	0.158121	Y66D12A.11	N.A.			D1069.2	1.101	2.14504	0.000477453	0.0507002	cpn-2	cpn-2 encodes a calponin homolog, more similar to the calponin paralogs transgelin (SM22 alpha) or neuronal protein NP25 than to calponin per se.
W09C3.6	2.079	4.22514	0.000198643	0.0210647	gsp-3	gsp-3 encodes an ortholog of protein phosphatase 1 gamma, a Glc7\/PP1 phosphatase (HGNC:PPP1CA)\; GSP-3 is nearly identical to GSP-4, and the two proteins appear to function redundantly during sperm development\; GSP-3\/4 activity is required for chromosome partitioning during sperm meiosis and for sperm motility, specifically for pseudopod development and a normal rate of pseudopodial treadmilli…			F39F10.4	1.10074	2.14465	0.00675595	0.215107	F39F10.4	N.A.
Y69F12A.1	2.078	4.22222	0.0276873	0.355437	Y69F12A.1	N.A.			F45C12.6	1.10029	2.14398	0.0397273	0.52328	btb-8	N.A.
C27B7.6	2.07731	4.22018	0.0132877	0.224449	C27B7.6	N.A.			C47D12.4	1.10016	2.14379	0.0170465	0.343118	C47D12.4	This gene encodes a protein containing an F-box, a motif predicted to mediate protein-protein interactions either with homologs of yeast Skp-1p or with other proteins.
Y47G6A.13	2.0765	4.21782	3.56323e-05	0.00693986	Y47G6A.13	N.A.			ZK930.3	1.09954	2.14286	0.0377199	0.513953	vab-23	vab-23 encodes a novel 253 amino acid coiled-coil containing a C-terminal C4H2 zinc finger domain\; VAB-23 is a conserved protein and has a strong homology to human hepatocellular carcinoma antigen (HCA127) (OMIM: 610334)\; vab-23 is required in ventral neuroblasts for ventral closure and elongation of the embryo, specifically to regulate proper cell contacts between contralateral pairs of ventra…
C28C12.11	2.07574	4.21561	0.00115079	0.0562566	C28C12.11	N.A.			C26G2.1	1.09711	2.13925	0.00311808	0.136086	syg-2	syg-2 encodes a transmembrane protein that is a member of the immunoglobulin superfamily of proteins\; during larval development, SYG-2 activity is required in vulval epithelial cells for proper synaptic specificity of the HSNL neuron\; in regulating synapse formation, SYG-2 acts as a guidepost protein for the SYG-1 receptor that interacts with SYG-2 and acts within HSNL to regulate synaptic spec…
F53G12.6	2.07564	4.2153	0.0110077	0.204137	spe-8	spe-8 is predicted to encode a non-receptor tyrosine kinase with a SH2 domain\; spe-8 is required for hermaphrodite spermatogenesis or sperm activation but not for male-derived sperm activation (sperm activation is the morphogenesis of a round non-motile spermatid to an amoeboid crawling sperm)\; however, mutant hermaphrodite spe-8 spermatids can transactivate and form functional sperm during mat…			F49E12.6	1.09103	2.13026	0.000194238	0.0318177	efl-3	efl-3 encodes a protein with two E2F domains that may be involved in apoptosis.
H23L24.2	2.07481	4.21288	0.0458339	0.464918	ipla-5	ipla-5 encodes a phospholipase A2.			C18A3.8	1.08234	2.11747	0.0240648	0.410557	hlh-14	hlh-14 encodes a basic helix-loop-helix (bHLH) transcription factor that is one of five C. elegans Achaete-Scute family homologs\; HLH-14 activity is required generally for normal egg-laying, movement, body morphology, and larval development\; more specifically, HLH-14 is required for proper neuronal development, particularly for regulation of the asymmetric cell division that gives rise to the P…
B0379.2	2.0731	4.20789	0.00146065	0.0635818	B0379.2	N.A.			Y71F9B.8	1.08112	2.11568	0.00301236	0.134519	lron-11	N.A.
F36H12.8	2.07271	4.20676	0.0062694	0.146742	ttbk-2	N.A.			W03F9.4	1.07657	2.10901	0.00665351	0.214663	W03F9.4	N.A.
F08H9.2	2.07227	4.20548	0.000779726	0.0452471	F08H9.2	N.A.			C24H12.1	1.0763	2.10863	0.00310275	0.135856	C24H12.1	This gene encodes a protein containing an F-box, a motif predicted to mediate protein-protein interactions either with homologs of yeast Skp-1p or with other proteins\; its encoded protein also contains a Pfam-B45 motif of presently unknown function.
Y57G11C.5	2.07204	4.20481	0.00421412	0.113406	Y57G11C.5	N.A.			T01G9.3	1.07471	2.1063	0.0360884	0.505602	dma-1	N.A.
C17H12.5	2.06805	4.1932	0.000516086	0.0349826	C17H12.5	N.A.			F08C6.4	1.07182	2.10208	3.14937e-05	0.0115791	sto-1	N.A.
Y105E8A.27	2.06753	4.19169	0.000171428	0.0193948	Y105E8A.27	N.A.			F41G3.12	1.0699	2.09929	0.0121561	0.287293	agr-1	agr-1 encodes a large (1396-residue) putative agrin, orthologous to human AGRIN (OMIM:103320), EGFLAM, and Q9NQ15\; AGR-1 is expressed in buccal epithelium and deposited in pharyngeal basal epithelium\; AGR-1 is also expressed in IL1 neurons, distal tip cells, and intestine\; an AGR-1 fragment can cluster vertebrate dystroglycan in cell culture\; agr-1(eg1770) mutations show no obvious phenotype,…
Y40H4A.2	2.06662	4.18903	0.0035068	0.101003	Y40H4A.2	N.A.			Y37E11AR.6	1.06922	2.0983	0.0180018	0.350827	vab-2	The vab-2 gene encodes an ephrin molecule related to human ephrin B2 (OMIM:600527)\; VAB-2, expressed primarily in neuronal cells, is a ligand for the VAB-1 ephrin receptor and plays a role in embryonic cell movements, epidermal morphogenesis during later embryogenesis, and oocyte maturation\; VAB-2 synergizes with PTP-3, a LAR-like receptor tyrosine phosphatase, to regulate morphogenesis.
F36A4.2	2.06244	4.17692	0.00184418	0.0722724	F36A4.2	N.A.			C08F1.6	1.06632	2.09408	0.00937962	0.252573	C08F1.6	N.A.
C01G5.4	2.06055	4.17144	0.00778963	0.163989	C01G5.4	N.A.			C36F7.1	1.06541	2.09276	0.00669513	0.215107	irx-1	irx-1 encodes a homeodomain-containing protein that is most similar to members of the Iroquois subclass of TALE (three amino acid loop extension) superclass atypical homeodomain proteins\; IRX-1 functions downstream of the UNC-55 nuclear receptor in a transcriptional regulatory network that controls remodeling of the GABAergic DD neuron synapses during larval development.
T05H4.2	2.05904	4.16709	0.00676956	0.15165	fbxa-196	This gene encodes a protein containing an F-box, a motif predicted to mediate protein-protein interactions either with homologs of yeast Skp-1p or with other proteins\; this gene's encoded protein also contains an FTH\/DUF38 motif, which may also mediate protein-protein interaction.			ZK930.6	1.06534	2.09267	0.0355323	0.501243	ZK930.6	N.A.
F45E4.1	2.05633	4.15928	1.48456e-05	0.00448965	warf-1	N.A.			D2023.7	1.05909	2.08362	0.0188898	0.357291	col-158	N.A.
Y71G12B.17	2.05406	4.15272	0.00164841	0.0685793	Y71G12B.17	N.A.			Y51H7BR.1	1.05841	2.08263	0.0311067	0.470322	fbxb-42	N.A.
K05F1.7	2.05312	4.15002	0.0208964	0.300931	msp-63	msp-63 encodes a protein that belongs to a family of proteins called the Major Sperm Proteins (MSPs) that is conserved in nematodes\; this family consists of closely related, small, basic proteins that make up 15\% of sperm protein\; this multigene family consists of over fifty genes, including many pseudogenes\; MSPs are involved in both extracellular signaling and cytoskeletal functions during …			F38A6.1	1.05721	2.0809	0.00869783	0.24255	pha-4	pha-4 encodes a FoxA transcription factor\; during embryonic development, PHA-4 functions as an organ identity gene whose activity is necessary and sufficient for development of the pharynx\/foregut\; in addition, PHA-4 plays a key role in regulation of diet-restriction-induced longevity in adult animals\; PHA-4 expression begins early in embryogenesis and is seen in pharyngeal and intestinal cel…
C25D7.1	2.04931	4.13907	0.00248544	0.0839959	C25D7.1	N.A.			Y46G5A.27	1.0566	2.08002	0.0102842	0.263094	pes-10	This gene encodes a protein containing an F-box, a motif predicted to mediate protein-protein interactions either with homologs of yeast Skp-1p or with other proteins.
F10F2.8	2.04738	4.13356	0.0102281	0.19473	clec-153	N.A.			F08D12.6	1.05494	2.07763	0.0337602	0.487462	fbxb-108	This gene encodes a protein containing an F-box, a motif predicted to mediate protein-protein interactions either with homologs of yeast Skp-1p or with other proteins\; its encoded protein also contains a Pfam-B45 motif of presently unknown function.
C54G4.2	2.04685	4.13202	0.00199633	0.0745582	C54G4.2	N.A.			Y106G6D.1	1.05479	2.07742	0.00174589	0.100192	Y106G6D.1	N.A.
B0218.5	2.0435	4.12244	0.00714444	0.157358	B0218.5	N.A.			C52D10.7	1.05387	2.0761	0.00103566	0.0758448	skr-9	skr-9 encodes a homolog of Skp1 in S. cerevisiae, a component of the SCF (Skp1, Cullin, F-box) ubiquitin-ligase complex that regulates ubiquitin-mediated protein degradation\; SKR-9 is required for posterior body morphogenesis, embryonic and larval development, and postembryonic cell proliferation.
D2062.6	2.03932	4.11052	0.0251373	0.333338	msrp-6	N.A.			F40G9.6	1.0513	2.0724	0.0196999	0.361356	F40G9.6	N.A.
R10D12.10	2.0387	4.10875	0.0115578	0.209116	R10D12.10	N.A.			F39D8.1	1.0491	2.06924	0.0386414	0.519677	pqn-36	The protein product of this gene is predicted to contain a glutamine\/asparagine (Q\/N)-rich ('prion') domain, by the algorithm of Michelitsch and Weissman (as of the WS77 release of WormBase, i.e., in wormpep77).
F31E8.5	2.03837	4.10782	0.00130019	0.0606727	F31E8.5	N.A.			R07B1.9	1.04522	2.06368	0.0419617	0.539462	R07B1.9	N.A.
F36A2.10	2.03775	4.10605	7.86222e-05	0.0112169	F36A2.10	N.A.			C43E11.6	1.04384	2.06171	0.00501874	0.182926	nab-1	nab-1 encodes a PDZ and SAM domain-containing protein that is the sole C. elegans ortholog of the mammalian Neurabin\/Spinophilin proteins\; by homology, NAB-1 is predicted to interact with F-actin, ZYG-8\/Doublecortin and the SAD-1 serine\/threonine kinase to regulate interactions between the actin and microtubule networks during cell migration, growth cone guidance, and cell division\; loss of …
F38H4.4	2.03705	4.10404	0.0014999	0.0644466	F38H4.4	N.A.			F23D12.3	1.04294	2.06043	0.0216366	0.386032	F23D12.3	N.A.
T11F9.5	2.03647	4.10241	0.0433891	0.450983	nas-21	nas-21 encodes an astacin-like metalloprotease.			ZK822.1	1.03947	2.05547	0.0425826	0.545158	ZK822.1	N.A.
ZK892.5	2.03639	4.10218	0.00205582	0.0758212	ZK892.5	N.A.			T06E4.4	1.03451	2.04842	0.0302683	0.46396	col-147	N.A.
C07G1.6	2.03471	4.09741	0.00637686	0.147204	C07G1.6	N.A.			F13C5.2	1.03203	2.0449	0.00157753	0.0962648	F13C5.2	F13C5.2 encodes a bromodomain-containing protein\; loss of F13C5.2 activity via RNAi in wild-type or various mutant backgrounds results in embryonic and larval lethality as well as sterility, reduced brood sizes, and uncoordinated locomotion\; an F13C5.2::gfp reporter fusion is expressed ubiquitously from early embryogenesis through adulthood with notably stronger expression seen in neurons.
F10F2.7	2.03421	4.09599	0.00210877	0.076588	clec-151	N.A.			Y38H6C.16	1.03166	2.04437	0.0071276	0.220891	Y38H6C.16	N.A.
R13H9.6	2.03389	4.09508	0.0162695	0.257139	R13H9.6	N.A.			F58E1.3	1.03051	2.04274	0.010691	0.270818	fbxb-26	This gene encodes a protein containing an F-box, a motif predicted to mediate protein-protein interactions either with homologs of yeast Skp-1p or with other proteins.
ZC412.5	2.03168	4.0888	0.0154399	0.247648	ZC412.5	N.A.			ZK1053.4	1.028	2.03919	0.00449235	0.170846	ZK1053.4	ZK1053.4 encodes a coiled-coil domain-containing protein that is a member of the SEPA-1 family of proteins\; ZK1053.4 is selectively removed by autophagy during embryogenesis\; ZK1053.4 physically interacts with SQST-1, the C. elegans ortholog of p62\/sequestome\/SQSTM1\; ZK1053.4 is weakly expressed in the cytoplasm of the embryo at all stages and is present both diffusely and in aggregates.
ZK418.2	2.03065	4.08589	0.00869369	0.175503	ZK418.2	N.A.			F32A7.3	1.02535	2.03546	0.043743	0.550511	eva-1	eva-1 encodes, by alternative splicing, two isoforms of a cell-surface protein that acts cell-autonomously with SAX-3 as a SLT-1 receptor subunit, and is required for guidance of the AVM pioneer axon to the ventral nerve cord\; EVA-1's long isoform is predicted to have a signal sequence, an ectodomain with two lectinlike galactose-binding sequences, a single transmembrane sequence, and a cytodoma…
Y39E4B.11	2.03025	4.08477	0.00232374	0.0808514	Y39E4B.11	N.A.			R148.5	1.02139	2.02987	0.0141306	0.314465	R148.5	N.A.
Y59E9AR.1	2.03018	4.08455	0.00770874	0.16294	Y59E9AR.1	Y59E9AR.1 encodes a protein that contains a major sperm protein domain (MDP)\; the product of Y59E9AR.1 is present in sperm extracts.			M04F3.3	1.01812	2.02527	0.0242441	0.410749	kin-35	N.A.
ZK1053.2	2.02985	4.08362	0.00163333	0.0683338	ZK1053.2	N.A.			F44F1.6	1.01592	2.0222	0.00447657	0.170846	F44F1.6	N.A.
F17C8.7	2.02829	4.0792	0.00227614	0.0806182	F17C8.7	N.A.			F20C5.6	1.01503	2.02094	0.0146154	0.316378	F20C5.6	N.A.
F59A7.9	2.02801	4.07842	0.00882881	0.176869	cysl-4	N.A.			Y105C5B.13	1.01133	2.01577	0.000154583	0.0285576	skr-10	skr-10 encodes a homolog of Skp1 in S. cerevisiae, a core component of the SCF (Skp1p, Cullin, F-box) ubiquitin-ligase complex that facilitates ubiquitin-mediated protein degradation\; SKR-10 is required for posterior body morphogenesis, embryonic and larval development, and cell proliferation\; SKR-10 is expressed in the tip and end regions of the intestine and can interact in vivo with CUL-1 an…
C34G6.3	2.02746	4.07687	0.0163756	0.257415	C34G6.3	N.A.			F29B9.9	1.01117	2.01554	0.0312234	0.470479	col-111	N.A.
T06A4.2	2.02711	4.07586	0.00447118	0.117778	mps-3	mps-3 encodes a single-pass transmembrane protein that is related to the vertebrate KCNE proteins, also known as MinK-related peptides (MiRPs) that associate with, and regulate, pore-forming ion channels\; mps-1 is required for the normal function of several neurons and thus for normal body touch sensation, chemotaxis to select molecules, osmotic avoidance, and nose-touch\; when coexpressed in ti…			F28D1.2	1.01052	2.01464	0.00183779	0.101994	atz-1	atz-1 encodes a putative myosin heavy chain protein\; deletion of atz-1 results in temperature sensitive reproductive defects, including a depleted or Abnormal Transition Zone with decreased REC-8 expression and disorded ooctye chromosomes\; in somatic cells, atz-1 is expressed in the pharynx and the hypodermis.
R102.10	2.02689	4.07525	0.0017964	0.0713987	R102.10	N.A.			T05D4.2	1.00966	2.01344	0.00752559	0.227047	T05D4.2	N.A.
Y51B9A.3	2.01833	4.05116	0.00520962	0.129836	mpz-6	N.A.			T07H8.6	1.00893	2.01242	0.0321642	0.477479	ptr-15	ptr-15 encodes a nematode-specific member of the sterol sensing domain(SSD) proteins, distantly paralogous to Drosophila PATCHED (PTC) andhuman PTCH (OMIM:601309, mutated in basal cell nevus syndrome)\; PTR-15has no known function in vivo.
ZK39.10	2.01683	4.04693	0.0214349	0.305311	ZK39.10	N.A.			Y20C6A.2	1.00754	2.01048	3.36013e-05	0.0116192	fbxb-7	N.A.
K07F5.6	2.01667	4.04648	0.0271214	0.350462	K07F5.6	N.A.			M01D1.9	1.00298	2.00413	0.0196924	0.361356	fbxb-40	This gene encodes a protein containing an F-box, a motif predicted to mediate protein-protein interactions either with homologs of yeast Skp-1p or with other proteins\; its encoded protein also contains a Pfam-B45 motif of presently unknown function.
ZK892.3	2.01649	4.04599	0.00430145	0.115042	ZK892.3	N.A.			Y106G6D.2	1.00223	2.0031	0.0048738	0.180121	Y106G6D.2	N.A.
T16A9.5	2.01582	4.0441	0.0323426	0.386489	T16A9.5	N.A.			C30G12.1	1.00007	2.0001	0.0184596	0.355129	C30G12.1	N.A.
C24D10.1	2.01259	4.03505	0.00248901	0.0839959	ptp-5.1	N.A.			C39E6.4	0.997602	1.99668	0.0409012	0.53294	mls-2	mls-2 encodes a homeodomain protein of the HMX family\; during postembryonic development, MLS-2 is required for cell proliferation, cleavage orientation, and fate specification in the mesodermal M lineage\; in regulating M lineage proliferation and fate specification, MLS-2 appears to act upstream of CYE-1\/cyclin E and HLH-1\/CeMyoD, respectively, the latter of which is not expressed in the M li…
Y69E1A.1	2.01073	4.02987	0.0269254	0.349364	Y69E1A.1	N.A.			Y51A2D.19	0.997481	1.99651	0.0022801	0.11431	slo-1	slo-1 encodes a voltage- and calcium-activated potassium (BK) channel\; SLO-1 activity is required for muscle inactivation: mutants have wild-type levels of motor activity, but have less smooth movement and tend to stop and reverse direction\; SLO-1 is expressed in neurons and in body wall and vulval muscle\; SLO-1 localization in proximity to the EGL-19 L-type calcium channel in muscle membrane …
C09G9.4	2.01014	4.02822	0.00843242	0.172892	hdl-2	tag-19 superficially resembles aromatic-L-amino-acid\/L-histidine decarboxylases\; however, it is distantly related, being no closer to them than to glutamine decarboxylase\/sphingosinge lyase (e.g., tag-38, spl-1)\; tag-19 thus might be termed a Pyridoxal-phosphate (PLP) dependent decarboxylase-like protei, but is missing the absolutely conserved Lys residue of all PLP-DCs (hence the -like would…			F07E5.2	0.995892	1.99431	0.0178971	0.349797	fbxb-35	This gene encodes a protein containing an F-box, a motif predicted to mediate protein-protein interactions either with homologs of yeast Skp-1p or with other proteins\; its encoded protein also contains a Pfam-B45 motif of presently unknown function.
Y47D3A.11	2.00882	4.02454	0.00687197	0.152551	wht-8	N.A.			T25D10.4	0.993997	1.9917	0.00148496	0.0940193	T25D10.4	N.A.
[truncated: 1,103 more rows]

## Sheet: Sheet3
fmo-2O; -4 KO	Log2Fc/N2	Fc/N2	pvalue	padj	Gene Name	Concise Description	Notes		fmo-2O; 4O	Log2Fc/N2	Fc/N2	pvalue	padj	Gene Name	Concise Description	Notes		fmo-2O; -4K	Log2Fc/C9	Fc/C9	pvalue	padj	Gene Name	Concise Description	Notes		fmo-2O; -4O	Log2Fc/C9	Fc/C9	pvalue	padj	Gene Name	Concise Description	Notes
[truncated: 1,500 more rows]
