# Supplementary material for: fmo-4 promotes longevity and stress resistance via ER to mitochondria calcium regulation in C. elegans
Source: eLife. 2025 Feb 14;13:RP99971. doi: 10.7554/eLife.99971 (PMC11828484; doi:10.7554/eLife.99971)
Supplement: Supplementary file 3. [file elife-99971-supp3.xlsx]

## Sheet: RNAi List
RNAi	Description	E. coli strain	RNAi Library
EV	Empty Vector RNAi control	HT115	Ahringer
crt-1	calreticulin knock down	HT115	Ahringer
itr-1	inositol triphosphate receptor knock down	HT115	Ahringer
mcu-1	mitochondrial calcium uniporter knock down	HT115	Ahringer
atf-6	activating transcription factor-6 knock down	HT115	Ahringer
atf-4	activating transcription factor-4 knock down	HT115	Ahringer
pek-1	PERK kinase knock down	HT115	Ahringer
ire-1	IRE1 kinase knock down	HT115	Ahringer
xbp-1	X-box binding protein knock down	HT115	Ahringer
