# Supplementary material for: fmo-4 promotes longevity and stress resistance via ER to mitochondria calcium regulation in C. elegans
Source: eLife. 2025 Feb 14;13:RP99971. doi: 10.7554/eLife.99971 (PMC11828484; doi:10.7554/eLife.99971)
Supplement: Supplementary file 4. [file elife-99971-supp4.xlsx]

## Sheet: Worm Strains
Worm Strain Description	Source	Identifier
Wild-Type	CGC	N2 or WT
fmo-4(ok294)	CGC	fmo-4 KO
fmo-2(ok2147)	CGC	fmo-2 KO
eft-3p::fmo-4::SL2-GFP-let-858 3'UTR	Suny BioScience	fmo-4 OE ubiquitous
dpy-7p::fmo-4::SL2-GFP-let-858 3'UTR	Suny BioScience	fmo-4 OE hypodermal
KAE9; fmo-4(ok294)	In House	fmo-2OE;4KO
KAE9; LEI168	In House	fmo-2OE;4OE
eft-3p::fmo-4::SL2-GFP-let-858 3'UTR;fmo-2(ok2147)	In House	fmo-4OE;2KO
eft-3p::fmo-2 + h2b ::gfp + Cbr-unc-119(+)	Injection In House	fmo-2 OE
fmo-4p::mCherry	Suny BioScience	fmo-4p::mCherry
