# Supplementary material for: fmo-4 promotes longevity and stress resistance via ER to mitochondria calcium regulation in C. elegans
Source: eLife. 2025 Feb 14;13:RP99971. doi: 10.7554/eLife.99971 (PMC11828484; doi:10.7554/eLife.99971)
Supplement: Supplementary file 5. [file elife-99971-supp5.xlsx]

## Sheet: qPCR primers
qPCR Primer	Sequence
cdc-42_qPCR_F	CTGCTGGACAGGAAGATTACG
cdc-42_qPCR_R	CTCGGACATTCTCCAATGAAG
Y45F10D4_qPCR_F	GTCGCTTCAAATCAGTTCAGC
Y45F10D4_qPCR_R	GTTCTTGTCAAGTGATCCGACA
fmo-2_qPCR_F	ACGAAACGAATGAGTCGTCAGT
fmo-2_qPCR_R	AGAGCAGACAAGAACGCCAT
fmo-4_qPCR_F	AGGGAGGCAGAGAATTCAAGT
fmo-4_qPCR_R	GGGAAATCCGAGTAGGCC

## Sheet: genotyping primers
Genotyping Primer	Sequence
fmo-4_ok294_F (fmo-4 KO)	GCATATGGTACATTTGCCCC
fmo-4_ok294_R (fmo-4 KO)	AAATCAACTCAAACCGCACC
fmo-2_ok2147_F (fmo-2 KO)	TGTTCAATGATCGTACCCGA
fmo-2_ok2147_R (fmo-2 KO)	GTTCGAAATTGGGAAATCCA
ttTi4348_ChrI_HR_F (fmo-2 OE)	AATTCCTGAGCTGCATGGCT
ttTi4348_ChrI_HR_R (fmo-2 OE)	GTCGACCGCTAGTGTAGCTT
ttTi4348_ChrI_internal_R (fmo-2 OE)	TGAGCCAATTCATCCCGGTT
fmo-4 OE ubiquitous	visualized green fluorescence
fmo-4 OE hypodermal	visualized green fluorescence
